# Supplementary material
Source: PubMed Central journal article supplement (PMC5879496)
Supplement: NIHMS940842-supplement.pdf [file NIHMS940842-supplement.pdf]

## Supplementary appendix

### INDEX

| <a href="#">Link</a> | <a href="#">Page</a> | <a href="#">Content</a>                                                                                                                                                                                                                                                                                                                                                                    |
|----------------------|----------------------|--------------------------------------------------------------------------------------------------------------------------------------------------------------------------------------------------------------------------------------------------------------------------------------------------------------------------------------------------------------------------------------------|
| <b>Web-table 1</b>   | <b>2</b>             | Haematological malignancies in adults and children - definition and groupings based on the International Classification of Diseases for Oncology, third edition                                                                                                                                                                                                                            |
| <b>Web-table 2</b>   | <b>6</b>             | Data quality indicators, patients diagnosed 2000-2014: for all cancers combined, adults (15-99 years) diagnosed with one of 15 common malignancies and children (0-14 years) diagnosed with one of three common malignancies, by continent, country and registry                                                                                                                           |
| <b>Web-table 3</b>   | <b>102</b>           | Population covered by participating registries (number of persons and % of national population), and number of adults (15-99 years) diagnosed with one of 15 common malignancies and children (0-14 years) diagnosed with one of three common malignancies who were included in survival analyses, by continent, country and registry: <a href="#">patients diagnosed during 2000-2014</a> |
| <b>Web-table 3.1</b> | <b>111</b>           | Number of patients included in survival analyses, by continent, country and registry: <a href="#">patients diagnosed during 2000-2004</a>                                                                                                                                                                                                                                                  |
| <b>Web-table 3.2</b> | <b>120</b>           | Number of patients included in survival analyses, by continent, country and registry: <a href="#">patients diagnosed during 2005-2009</a>                                                                                                                                                                                                                                                  |
| <b>Web-table 3.3</b> | <b>129</b>           | Number of patients included in survival analyses, by continent, country and registry: <a href="#">patients diagnosed during 2010-2014</a>                                                                                                                                                                                                                                                  |
| <b>Web-table 4</b>   | <b>138</b>           | Age-standardised five-year net survival (%): adults (15-99 years) diagnosed with one of 15 common malignancies and children (0-14 years) diagnosed with one of three common malignancies, by continent, country, registry and calendar period of diagnosis (2000-2004, 2005-2009, 2010-2014)                                                                                               |
| <b>Web-table 4.1</b> | <b>139</b>           | Cancers of the oesophagus, stomach, colon, rectum, liver and pancreas                                                                                                                                                                                                                                                                                                                      |
| <b>Web-table 4.2</b> | <b>152</b>           | Cancer of the lung, melanoma of the skin, cancers of the breast, ovary, cervix and prostate                                                                                                                                                                                                                                                                                                |
| <b>Web-table 4.3</b> | <b>165</b>           | Brain tumours (adults), brain tumours (children), adults with myeloid or lymphoid malignancies, and children with acute lymphoblastic leukaemia or lymphoma                                                                                                                                                                                                                                |
| <b>Web-figure 1</b>  | <b>178</b>           | Maps of participating countries and territories: adults and children                                                                                                                                                                                                                                                                                                                       |
| <b>Web-figure 2</b>  | <b>209</b>           | Global distribution of age-standardised five-year net survival (%), adults (15-99 years) diagnosed with one of 15 common malignancies and children (0-14 years) diagnosed with one of 3 common malignancies, by continent, country and period of diagnosis (2000-2004, 2005-2009, 2010-2014)                                                                                               |
| <b>Web-figure 3</b>  | <b>228</b>           | 20-year trends in age-standardised five-year net survival (%), adults (15-99 years) diagnosed with one of 15 common malignancies and children (0-14 years) diagnosed with one of 3 common malignancies during 1995-1999, 2000-2004, 2005-2009 and 2010-2014, by continent (or continental region) and country                                                                              |
| <b>Web-figure 4</b>  | <b>247</b>           | Range of age-standardised five-year net survival (%), adults (15-99 years) diagnosed with one of 15 common malignancies, and children (0-14 years) diagnosed with one of 3 common malignancies, by continent and period of diagnosis (2000-2004, 2005-2009 and 2010-2014)                                                                                                                  |
| <b>Web-annex 1</b>   | <b>266</b>           | Structure of survival analyses, patients diagnosed 2000-2014                                                                                                                                                                                                                                                                                                                               |
| <b>Web-annex 2</b>   | <b>267</b>           | CONCORD-3 life table report                                                                                                                                                                                                                                                                                                                                                                |

**Web-table 1: Haematological malignancies in adults and children - definition and groupings based on the International Classification of Diseases for Oncology, third edition\***

- \* New entities defined in the first revision of ICD-O-3<sup>15</sup> are underlined. Adapted from HAEMACARE<sup>17</sup> and ICC-3.<sup>20</sup> CLL/SLL: Chronic lymphocytic leukaemia/small lymphocytic lymphoma; HL: Hodgkin lymphoma; NHL: Non-Hodgkin lymphoma; NOS: not otherwise specified
- † ICD-O-3 topography: C42.0: blood, C42.1: bone marrow, C42.3: reticulo-endothelial system NOS, C42.4: haematopoietic system NOS, C80.9: unknown primary site.

**Web-table 1 Haematological malignancies in adults and children - definition and groupings based on the International Classification of Diseases for Oncology, third edition\***

| HAEMACARE group (adults)                                                        | Morphology and behaviour* | ICD-O-3.1 description                                                            | ICCC-3 group (children)                                                                                                   |
|---------------------------------------------------------------------------------|---------------------------|----------------------------------------------------------------------------------|---------------------------------------------------------------------------------------------------------------------------|
| <b>1 Lymphoma NOS</b>                                                           | 9590/3                    | Malignant lymphoma, NOS                                                          | <b>II Lymphoma</b>                                                                                                        |
| <b>2 NH Lymphoma NOS</b>                                                        | 9591/3                    | Malignant lymphoma, non-Hodgkin, NOS                                             |                                                                                                                           |
|                                                                                 | 9597/3                    | Primary cutaneous follicle centre lymphoma                                       |                                                                                                                           |
| <b>3 Composite HL and NHL</b>                                                   | 9596/3                    | Composite Hodgkin and non-Hodgkin lymphoma                                       |                                                                                                                           |
| <b>4 HL nodular lymphocyte predominance</b>                                     | 9659/3                    | Hodgkin lymphoma, nodular lymphocyte predominance                                |                                                                                                                           |
| <b>5 Classical HL</b>                                                           | 9650/3                    | Hodgkin lymphoma, NOS                                                            |                                                                                                                           |
|                                                                                 | 9651/3                    | Hodgkin lymphoma, lymphocyte-rich                                                |                                                                                                                           |
|                                                                                 | 9652/3                    | Hodgkin lymphoma, mixed cellularity, NOS                                         |                                                                                                                           |
|                                                                                 | 9653/3                    | Hodgkin lymphoma, lymphocyte depletion, NOS                                      |                                                                                                                           |
|                                                                                 | 9654/3                    | Hodgkin lymphoma, lymphocyte depletion, diffuse fibrosis                         |                                                                                                                           |
|                                                                                 | 9655/3                    | Hodgkin lymphoma, lymphocyte depletion, reticular                                |                                                                                                                           |
|                                                                                 | 9661/3                    | Hodgkin granuloma                                                                |                                                                                                                           |
|                                                                                 | 9662/3                    | Hodgkin sarcoma                                                                  |                                                                                                                           |
|                                                                                 | 9663/3                    | Hodgkin lymphoma, nodular sclerosis, NOS                                         |                                                                                                                           |
|                                                                                 | 9664/3                    | Hodgkin lymphoma, nodular sclerosis, cellular phase                              |                                                                                                                           |
| <b>6 CLL/SLL</b>                                                                | 9670/3                    | Malignant lymphoma, small B lymphocytic, NOS                                     | Other or not grouped                                                                                                      |
|                                                                                 | 9823/3                    | B-cell chronic lymphocytic leukaemia/small lymphocytic lymphoma                  |                                                                                                                           |
| <b>7 Immunoproliferative diseases</b>                                           | 9671/3                    | Malignant lymphoma, lymphoplasmacytic                                            | <b>II Lymphoma</b>                                                                                                        |
|                                                                                 | 9760/3                    | Immunoproliferative disease, NOS                                                 |                                                                                                                           |
|                                                                                 | 9761/3                    | Waldenstrom macroglobulinemia                                                    |                                                                                                                           |
|                                                                                 | 9762/3                    | Heavy chain disease, NOS                                                         |                                                                                                                           |
| <b>8 Mantle cell/centrocytic lymphoma</b>                                       | 9673/3                    | Mantle cell lymphoma                                                             |                                                                                                                           |
| <b>9 Follicular B lymphoma</b>                                                  | 9690/3                    | Follicular lymphoma, NOS                                                         |                                                                                                                           |
|                                                                                 | 9691/3                    | Follicular lymphoma, grade 2                                                     |                                                                                                                           |
|                                                                                 | 9695/3                    | Follicular lymphoma, grade 1                                                     |                                                                                                                           |
| <b>10 Diffuse B lymphoma</b>                                                    | 9698/3                    | Follicular lymphoma, grade 3                                                     |                                                                                                                           |
|                                                                                 | 9675/3                    | Malignant lymphoma, mixed small and large cell, diffuse                          |                                                                                                                           |
|                                                                                 | 9678/3                    | Primary effusion lymphoma                                                        |                                                                                                                           |
|                                                                                 | 9679/3                    | Mediastinal large B-cell lymphoma                                                |                                                                                                                           |
|                                                                                 | 9680/3                    | Malignant lymphoma, large B-cell, diffuse, NOS                                   |                                                                                                                           |
|                                                                                 | 9684/3                    | Malignant lymphoma, large B-cell, diffuse, immunoblastic, NOS                    |                                                                                                                           |
|                                                                                 | 9688/3                    | T-cell/histiocyte rich large B-cell lymphoma                                     |                                                                                                                           |
|                                                                                 | 9712/3                    | Intravascular large B-cell lymphoma                                              |                                                                                                                           |
|                                                                                 | 9735/3                    | Plasmablastic lymphoma                                                           |                                                                                                                           |
|                                                                                 | 9737/3                    | ALK positive large B-cell lymphoma                                               |                                                                                                                           |
| <b>11 Burkitt's leukaemia/lymphoma</b>                                          | 9738/3                    | Large B-cell lymphoma arising in HHV8-associated multicentric Castleman disease  | Other or not grouped                                                                                                      |
|                                                                                 | 9687/3                    | Burkitt lymphoma, NOS                                                            |                                                                                                                           |
| <b>12 Marginal zone lymphoma</b>                                                | 9826/3                    | Burkitt cell leukaemia                                                           | <b>II Lymphoma</b>                                                                                                        |
|                                                                                 | 9689/3                    | Splenic marginal zone B-cell lymphoma                                            |                                                                                                                           |
|                                                                                 | 9699/3                    | Marginal zone B-cell lymphoma, NOS                                               |                                                                                                                           |
|                                                                                 | 9764/3                    | Immunoproliferative small intestinal disease                                     |                                                                                                                           |
| <b>13 T lymphoma cutaneous</b>                                                  | 9700/3                    | Mycosis fungoides                                                                | <b>II Lymphoma</b>                                                                                                        |
|                                                                                 | 9701/3                    | Sezary syndrome                                                                  |                                                                                                                           |
|                                                                                 | 9708/3                    | Subcutaneous panniculitis-like T-cell lymphoma                                   |                                                                                                                           |
|                                                                                 | 9709/3                    | Cutaneous T-cell lymphoma, NOS                                                   |                                                                                                                           |
|                                                                                 | 9718/3                    | Primary cutaneous CD30+ T-cell lymphoproliferative disorder                      |                                                                                                                           |
|                                                                                 | 9726/3                    | Primary cutaneous gamma-delta T-cell lymphoma                                    |                                                                                                                           |
| <b>14 Other T-cell lymphoma</b>                                                 | 9702/3                    | Mature T-cell lymphoma, NOS                                                      | Other or not grouped                                                                                                      |
|                                                                                 | 9705/3                    | Angioimmunoblastic T-cell lymphoma                                               |                                                                                                                           |
|                                                                                 | 9714/3                    | Anaplastic large cell lymphoma, T cell and Null cell type                        |                                                                                                                           |
|                                                                                 | 9716/3                    | Hepatosplenic T cell lymphoma                                                    |                                                                                                                           |
|                                                                                 | 9717/3                    | Intestinal T-cell lymphoma                                                       |                                                                                                                           |
|                                                                                 | 9719/3                    | NK/T-cell lymphoma, nasal and nasal-type                                         |                                                                                                                           |
|                                                                                 | 9725/3                    | Hydroa vacciniforme-like lymphoma                                                |                                                                                                                           |
|                                                                                 | 9827/3                    | Adult T-cell leukaemia/lymphoma (HTLV-1 positive)                                |                                                                                                                           |
|                                                                                 | 9831/3                    | T-cell large granular lymphocytic leukaemia                                      |                                                                                                                           |
|                                                                                 | 9834/3                    | Prolymphocytic leukaemia, T-cell type                                            |                                                                                                                           |
|                                                                                 | 9948/3                    | Aggressive NK-cell leukaemia                                                     |                                                                                                                           |
| <b>15 Lymphoblastic lymphoma/acute (precursor cell) lymphoblastic leukaemia</b> | 9727/3                    | Precursor cell lymphoblastic lymphoma, NOS                                       | <b>II Lymphoma</b>                                                                                                        |
|                                                                                 | 9728/3                    | Precursor B-cell lymphoblastic lymphoma                                          |                                                                                                                           |
|                                                                                 | 9729/3                    | Precursor T-cell lymphoblastic lymphoma                                          |                                                                                                                           |
|                                                                                 | 9811/3                    | B lymphoblastic leukaemia/lymphoma, NOS                                          |                                                                                                                           |
|                                                                                 | 9812/3                    | B lymphoblastic leukaemia/lymphoma with t(9;22)(q34;q11.2); BCR-ABL1             |                                                                                                                           |
|                                                                                 | 9813/3                    | B lymphoblastic leukaemia/lymphoma with t(v;11q23); MLL rearranged               | <b>la1 precursor-cell lymphoid leukaemias (ALL) if topography C42.0, C42.1, C42.3, C42.4, C80.9 †; II Lymphoma if not</b> |
|                                                                                 | 9814/3                    | B lymphoblastic leukaemia/lymphoma with t(12;21)(p13;q22); TEL-AML1 (ETV6-RUNX1) |                                                                                                                           |
|                                                                                 | 9815/3                    | B lymphoblastic leukaemia/lymphoma with hyperdiploidy                            |                                                                                                                           |
|                                                                                 | 9816/3                    | B lymphoblastic leukaemia/lymphoma with hypodiploidy (Hypodiploid ALL)           |                                                                                                                           |
|                                                                                 | 9817/3                    | B lymphoblastic leukaemia/lymphoma with t(5;14)(q31;q32); IL3-IGH                |                                                                                                                           |
|                                                                                 | 9818/3                    | B lymphoblastic leukaemia/lymphoma with t(1;19)(q23;p13.3); E2A-PBX1 (TCF3-PBX1) | <b>la1 precursor-cell lymphoid leukaemias lymphoid leukaemias (ALL)</b>                                                   |
|                                                                                 | 9835/3                    | Precursor cell lymphoblastic leukaemia, NOS                                      |                                                                                                                           |
|                                                                                 | 9836/3                    | Precursor B-cell lymphoblastic leukaemia                                         |                                                                                                                           |
|                                                                                 | 9837/3                    | Precursor T-cell lymphoblastic leukaemia                                         |                                                                                                                           |
|                                                                                 |                           |                                                                                  |                                                                                                                           |

**Web-table 1 Haematological malignancies in adults and children - definition and groupings based on the International Classification of Diseases for Oncology, third edition\***

| HAEMACARE group (adults)                               | Morphology and behaviour*                                                                                                                                                                                                                             | ICD-O-3.1 description                                                                                                                                                                                                                                                                                                                                                                                                                                                                                                                                                                                                                                                                                                                                                                                                                                                                                                                                                                                                                                                | ICCC-3 group (children)                            |
|--------------------------------------------------------|-------------------------------------------------------------------------------------------------------------------------------------------------------------------------------------------------------------------------------------------------------|----------------------------------------------------------------------------------------------------------------------------------------------------------------------------------------------------------------------------------------------------------------------------------------------------------------------------------------------------------------------------------------------------------------------------------------------------------------------------------------------------------------------------------------------------------------------------------------------------------------------------------------------------------------------------------------------------------------------------------------------------------------------------------------------------------------------------------------------------------------------------------------------------------------------------------------------------------------------------------------------------------------------------------------------------------------------|----------------------------------------------------|
| <b>16 Plasma cell neoplasms</b>                        | 9731/3<br>9732/3<br>9733/3<br>9734/3                                                                                                                                                                                                                  | Plasmacytoma, NOS<br>Multiple myeloma<br>Plasma cell leukaemia<br>Plasmacytoma, extramedullary (not occurring in bone)                                                                                                                                                                                                                                                                                                                                                                                                                                                                                                                                                                                                                                                                                                                                                                                                                                                                                                                                               | <b>II Lymphoma</b>                                 |
| <b>17 Mature B cell leukaemia</b>                      | 9833/3                                                                                                                                                                                                                                                | Prolymphocytic leukaemia, B-cell type                                                                                                                                                                                                                                                                                                                                                                                                                                                                                                                                                                                                                                                                                                                                                                                                                                                                                                                                                                                                                                | Other or not grouped                               |
| <b>18 Mature B-cell leukaemia, hairy cell</b>          | 9940/3                                                                                                                                                                                                                                                | Hairy cell leukaemia                                                                                                                                                                                                                                                                                                                                                                                                                                                                                                                                                                                                                                                                                                                                                                                                                                                                                                                                                                                                                                                 |                                                    |
| <b>19 Lymphatic leukaemia NOS</b>                      | 9820/3<br>9832/3                                                                                                                                                                                                                                      | Lymphoid leukaemia, NOS<br>Prolymphocytic leukaemia, NOS                                                                                                                                                                                                                                                                                                                                                                                                                                                                                                                                                                                                                                                                                                                                                                                                                                                                                                                                                                                                             |                                                    |
| <b>20 Leukaemia NOS</b>                                | 9800/3<br>9801/3<br>9805/3<br><u>9806/3</u><br><br><u>9807/3</u><br><br><u>9808/3</u><br><u>9809/3</u>                                                                                                                                                | Leukaemia, NOS<br>Acute leukaemia, NOS<br>Acute biphenotypic leukaemia<br>Mixed phenotype acute leukaemia with t(9;22)(q34;q11.2); BCR-ABL1<br><br>Mixed phenotype acute leukaemia with t(v;11q23); MLL rearranged<br><br>Mixed phenotype acute leukaemia, B/myeloid, NOS<br>Mixed phenotype acute leukaemia, T/myeloid, NOS                                                                                                                                                                                                                                                                                                                                                                                                                                                                                                                                                                                                                                                                                                                                         |                                                    |
| <b>21 Myeloid leukaemia NOS</b>                        | 9860/3<br><u>9898/3</u>                                                                                                                                                                                                                               | Myeloid leukaemia, NOS<br>Myeloid leukaemia associated with Down Syndrome                                                                                                                                                                                                                                                                                                                                                                                                                                                                                                                                                                                                                                                                                                                                                                                                                                                                                                                                                                                            |                                                    |
| <b>22 Acute myeloid leukaemia</b>                      | 9840/3<br>9861/3<br><u>9865/3</u><br>9866/3<br>9867/3<br><u>9869/3</u><br><br>9870/3<br>9871/3<br>9872/3<br>9873/3<br>9874/3<br>9891/3<br>9895/3<br>9896/3<br>9897/3<br>9910/3<br><u>9911/3</u><br><br>9920/3<br>9930/3<br>9931/3<br>9984/3<br>9987/3 | Acute myeloid leukaemia, M6 type<br>Acute myeloid leukaemia, NOS<br>Acute myeloid leukaemia with t(6;9)(p23;q34); DEK-NUP214<br>Acute promyelocytic leukaemia, t(15;17)(q22;q11-12)<br>Acute myelomonocytic leukaemia<br>Acute myeloid leukaemia with inv(3)(q21;q26.2) or t(3;3)(q21;q26.2); RPN1-EV1<br>Acute basophilic leukaemia<br>Acute myeloid leukaemia with abnormal marrow eosinophils<br>Acute myeloid leukaemia, minimal differentiation<br>Acute myeloid leukaemia without maturation<br>Acute myeloid leukaemia with maturation<br>Acute monocytic leukaemia<br>Acute myeloid leukaemia with myelodysplasia-related changes<br>Acute myeloid leukaemia, t(8;21)(q22;q22)<br>Acute myeloid leukaemia, 11q23 abnormalities<br>Acute megakaryoblastic leukaemia<br>Acute myeloid leukaemia (megakaryoblastic) with t(1;22)(p13;q13); RBM15-MKL1<br>Therapy-related myeloid neoplasm<br>Myeloid sarcoma<br>Acute panmyelosis with myelofibrosis<br>Refractory anemia with excess blasts in transformation<br>Therapy-related myelodysplastic syndrome, NOS |                                                    |
| <b>23 Myeloproliferative neoplasms</b>                 | 9740/3<br>9741/3<br>9742/3<br>9863/3<br>9875/3<br>9950/3<br>9960/3<br>9961/3<br>9962/3<br>9963/3<br>9964/3                                                                                                                                            | Mast cell sarcoma<br>Malignant mastocytosis<br>Mast cell leukaemia<br>Chronic myeloid leukaemia, NOS<br>Chronic myelogenous leukaemia, BCR/ABL positive<br>Polycythemia vera<br>Myeloproliferative neoplasm NOS<br>Primary myelofibrosis<br>Essential thrombocythemia<br>Chronic neutrophilic leukaemia<br>Chronic eosinophilic leukaemia NOS                                                                                                                                                                                                                                                                                                                                                                                                                                                                                                                                                                                                                                                                                                                        | <b>II Lymphoma</b><br><br><br>Other or not grouped |
| <b>24 Myelodysplastic syndrome</b>                     | 9980/3<br>9982/3<br>9983/3<br>9985/3<br>9986/3<br>9989/3<br><u>9991/3</u><br><u>9992/3</u>                                                                                                                                                            | Refractory anemia<br>Refractory anemia with sideroblasts<br>Refractory anemia with excess blasts<br>Refractory cytopenia with multilineage dysplasia<br>Myelodysplastic syndrome with 5q deletion (5q-) syndrome<br>Myelodysplastic syndrome, NOS<br>Refractory neutropenia<br>Refractory thrombocytopenia                                                                                                                                                                                                                                                                                                                                                                                                                                                                                                                                                                                                                                                                                                                                                           |                                                    |
| <b>25 Myelodysplastic/myeloproliferative neoplasms</b> | 9876/3<br>9945/3<br>9946/3<br>9975/3                                                                                                                                                                                                                  | Atypical chronic myeloid leukaemia, BCR/ABL negative<br>Chronic myelomonocytic leukaemia, NOS<br>Juvenile myelomonocytic leukaemia<br>Myeloproliferative neoplasm, unclassifiable                                                                                                                                                                                                                                                                                                                                                                                                                                                                                                                                                                                                                                                                                                                                                                                                                                                                                    |                                                    |

**Web-table 1 Haematological malignancies in adults and children - definition and groupings based on the International Classification of Diseases for Oncology, third edition\***

| HAEMACARE group (adults) | Morphology<br>and<br>behaviour* | ICD-O-3.1 description                                                 | ICCC-3 group (children) |
|--------------------------|---------------------------------|-----------------------------------------------------------------------|-------------------------|
| Other or not grouped     | 9724/3                          | Systemic EBV positive T-cell lymphoproliferative disease of childhood |                         |
|                          | 9750/3                          | Malignant histiocytosis                                               | II Lymphoma             |
|                          | <u>9751/3</u>                   | Langerhans cell histiocytosis, NOS                                    |                         |
|                          | <u>9752/1</u>                   | Langerhans cell histiocytosis, unifocal                               |                         |
|                          | <u>9753/1</u>                   | Langerhans cell histiocytosis, multifocal                             |                         |
|                          | 9754/3                          | Langerhans cell histiocytosis, disseminated                           |                         |
|                          | 9755/3                          | Histiocytic sarcoma                                                   |                         |
|                          | 9756/3                          | Langerhans cell sarcoma                                               |                         |
|                          | 9757/3                          | Interdigitating dendritic cell sarcoma                                |                         |
|                          | 9758/3                          | Follicular dendritic cell sarcoma                                     |                         |
|                          | <u>9759/3</u>                   | Fibroblastic reticular cell tumor                                     |                         |
|                          | 9765/1                          | Monoclonal gammopathy of undetermined significance                    |                         |
|                          | 9766/1                          | Angiocentric immunoproliferative lesion                               |                         |
|                          | 9767/1                          | Angioimmunoblastic lymphadenopathy (AIC)                              |                         |
|                          | 9768/1                          | T-gamma lymphoproliferative disease                                   |                         |
|                          | 9769/1                          | Immunoglobulin deposition disease                                     |                         |
|                          | 9965/3                          | Myeloid and lymphoid neoplasms with PDGFRA rearrangement              | Other or not grouped    |
|                          | 9966/3                          | Myeloid neoplasms with PDGFRB rearrangement                           |                         |
|                          | 9967/3                          | Myeloid and lymphoid neoplasms with FGFR1 abnormalities               | II Lymphoma             |
|                          | 9970/1                          | Lymphoproliferative disorder, NOS                                     |                         |
|                          | <u>9971/3</u>                   | Polymorphic post transplant lymphoproliferative disorder              |                         |

**Web-table 2: Data quality indicators, patients diagnosed 2000-2014: for all cancers combined, and for adults (15-99 years) diagnosed with one of 15 common malignancies and children (0-14 years) diagnosed with one of three common malignancies, by continent, country and registry**

### Adults

#### Web-table 2 All cancers combined

|                |                       |
|----------------|-----------------------|
| Web-table 2.1  | Oesophagus            |
| Web-table 2.2  | Stomach               |
| Web-table 2.3  | Colon                 |
| Web-table 2.4  | Rectum                |
| Web-table 2.5  | Liver                 |
| Web-table 2.6  | Pancreas              |
| Web-table 2.7  | Lung                  |
| Web-table 2.8  | Melanoma of the skin  |
| Web-table 2.9  | Breast (women)        |
| Web-table 2.10 | Cervix                |
| Web-table 2.11 | Ovary                 |
| Web-table 2.12 | Prostate              |
| Web-table 2.13 | Brain tumours         |
| Web-table 2.14 | Myeloid malignancies  |
| Web-table 2.15 | Lymphoid malignancies |

### Children

|                |                               |
|----------------|-------------------------------|
| Web-table 2.16 | Brain tumours                 |
| Web-table 2.17 | Acute lymphoblastic leukaemia |
| Web-table 2.18 | Lymphomas                     |

\* Data with 100% coverage of the national population.

† Data with 100% coverage of the national population for childhood malignancies only.

‡ **Korea:** Republic of Korea; **Russia:** Russian Federation.

¶ **Incomplete dates:** records in which the year of birth is unknown; or the month and/or year of diagnosis is unknown; or the year of last known vital status is unknown. **In situ** malignancy (ICD-O-3 behaviour code 2): some registries do not register in situ cancers; other registries did not submit them. **Other:** records with incomplete data, or for tumours that are benign (behaviour code 0, except brain tumours), of uncertain behaviour (1), metastatic from another organ (6), or unknown if primary or metastatic (9); or for patients with age outside the range 0-14 years (children) or 15-99 years (adults); or other conditions (see text).

|| **DCO:** tumours registered from a death certificate only (DCO), or detected solely at autopsy. Sweden does not register DCOs; autopsy-detected cases were not submitted for CONCORD-2, but have been submitted for CONCORD-3. **Other:** vital status or sex unknown; invalid date or sequence of dates; inconsistency of sex-site, site-morphology, age-site, age-morphology, or age-site-morphology.

†† **MV:** microscopically verified. **Non-specific morphology** (solid tumours only): ICD-O-3<sup>14,15</sup> morphology code in the range 8000-8005. **Censored:** patients whose last known vital status is “alive” and who were censored within five years of diagnosis or, if diagnosed in 2010 or later, before 31 December 2014.

Web-table 2: Data quality indicators, patients diagnosed during 2000-2014, by continent, country and registry: ALL CANCERS COMBINED

Back

|                                    | Calendar period | Patients submitted | Ineligible (%) ¶ |            |            | Eligible patients | Excluded (%) |            | Patients included | Data quality indicators (%) †† |                         |                   |             |
|------------------------------------|-----------------|--------------------|------------------|------------|------------|-------------------|--------------|------------|-------------------|--------------------------------|-------------------------|-------------------|-------------|
|                                    |                 |                    | Incomplete dates | In situ    | Other      |                   | DCO          | Other      |                   | MV                             | Non-specific morphology | Lost to follow-up | Censored    |
| <b>AFRICA</b>                      |                 | <b>46,627</b>      | <b>9.6</b>       | <b>0.4</b> | <b>1.1</b> | <b>41,447</b>     | <b>0.9</b>   | <b>2.1</b> | <b>40,197</b>     | <b>91.6</b>                    | <b>14.1</b>             | <b>7.6</b>        | <b>37.7</b> |
| Algerian registries                | 2000-2014       | 18,157             | 7.6              | 0.1        | 1.8        | 16,434            | 1.8          | 3.3        | 15,602            | 98.4                           | 10.2                    | 0.0               | 31.5        |
| Annaba                             | 2000-2014       | 4,898              | 12.6             | 0.2        | 5.9        | 3,981             | 1.6          | 1.2        | 3,872             | 94.2                           | 1.6                     | 0.0               | 80.8        |
| Sétif                              | 2000-2014       | 7,197              | 10.7             | 0.0        | 0.2        | 6,413             | 0.0          | 6.0        | 6,023             | 99.6                           | 14.6                    | 0.0               | 29.6        |
| Tlemcen                            | 2006-2014       | 6,062              | 0.0              | 0.0        | 0.4        | 6,040             | 3.8          | 1.7        | 5,707             | 100.0                          | 11.5                    | 0.0               | 0.1         |
| Mali (Bamako)                      | 2010-2012       | 104                | 41.3             | 0.0        | 0.0        | 61                | 0.0          | 1.6        | 60                | 100.0                          | 20.0                    | 0.0               | 0.0         |
| Mauritius *                        | 2005-2012       | 4,125              | 0.0              | 0.0        | 0.4        | 4,109             | 0.0          | 3.7        | 3,959             | 96.7                           | 19.8                    | 0.0               | 2.3         |
| Morocco (Casablanca)               | 2008-2012       | 4,840              | 1.4              | 0.0        | 0.1        | 4,769             | 0.0          | 1.8        | 4,683             | 100.0                          | 2.4                     | 33.0              | 35.6        |
| Nigeria (Ibadan)                   | 2003-2014       | 11,726             | 25.4             | 1.4        | 1.2        | 8,443             | 0.9          | 1.1        | 8,274             | 98.7                           | 2.0                     | 0.0               | 65.3        |
| South Africa (Eastern Cape)        | 2000-2014       | 7,675              | 0.0              | 0.0        | 0.6        | 7,631             | 0.0          | 0.2        | 7,619             | 62.3                           | 39.5                    | 19.7              | 40.2        |
| <b>AMERICA (Central and South)</b> |                 | <b>906,076</b>     | <b>5.4</b>       | <b>3.1</b> | <b>0.7</b> | <b>822,687</b>    | <b>13.7</b>  | <b>1.1</b> | <b>700,946</b>    | <b>92.4</b>                    | <b>8.0</b>              | <b>5.2</b>        | <b>3.7</b>  |
| Argentinian registries             | 2000-2014       | 75,167             | 1.7              | 1.5        | 0.5        | 72,366            | 10.8         | 0.6        | 64,151            | 96.5                           | 5.7                     | 0.0               | 2.3         |
| Chubut                             | 2008-2013       | 3,795              | 34.0             | 1.7        | 0.3        | 2,428             | 7.1          | 2.0        | 2,206             | 84.0                           | 20.4                    | 0.0               | 0.3         |
| Córdoba                            | 2004-2013       | 25,491             | 0.0              | 3.9        | 0.9        | 24,268            | 11.4         | 0.7        | 21,334            | 96.9                           | 6.0                     | 0.0               | 0.0         |
| Mendoza                            | 2003-2013       | 34,895             | 0.0              | 0.0        | 0.4        | 34,741            | 12.5         | 0.5        | 30,232            | 97.1                           | 4.6                     | 0.0               | 0.0         |
| Tierra del Fuego                   | 2005-2013       | 714                | 0.0              | 7.0        | 0.0        | 664               | 2.9          | 0.3        | 643               | 91.3                           | 10.6                    | 0.0               | 1.2         |
| Argentina (Childhood) †            | 2000-2014       | 10,272             | 0.0              | 0.0        | 0.1        | 10,265            | 4.7          | 0.4        | 9,736             | 96.8                           | 4.6                     | 0.0               | 14.8        |
| Brazilian registries               | 2000-2014       | 191,344            | 18.5             | 3.9        | 0.5        | 147,622           | 8.0          | 0.9        | 134,597           | 90.0                           | 10.6                    | 22.9              | 0.3         |
| Aracaju                            | 2000-2012       | 11,491             | 2.1              | 13.3       | 0.3        | 9,692             | 7.3          | 0.1        | 8,966             | 97.3                           | 3.4                     | 0.0               | 0.0         |
| Cuiabá                             | 2000-2009       | 1,918              | 5.2              | 47.5       | 0.1        | 906               | 4.4          | 13.5       | 744               | 98.8                           | 4.3                     | 0.0               | 0.0         |
| Curitiba                           | 2000-2012       | 35,730             | 0.0              | 0.6        | 0.5        | 35,336            | 15.0         | 0.4        | 29,895            | 96.5                           | 4.7                     | 0.0               | 0.0         |
| Goiânia                            | 2000-2012       | 8,187              | 7.8              | 2.4        | 0.3        | 7,329             | 9.6          | 1.7        | 6,500             | 98.1                           | 4.7                     | 0.5               | 6.4         |
| Jau                                | 2000-2014       | 3,692              | 1.0              | 8.7        | 1.1        | 3,293             | 1.4          | 0.2        | 3,240             | 96.0                           | 5.2                     | 0.0               | 1.6         |
| São Paulo                          | 2000-2012       | 130,326            | 26.3             | 3.3        | 0.5        | 91,066            | 5.4          | 0.9        | 85,252            | 86.0                           | 14.1                    | 36.1              | 0.0         |
| Chilean registries                 | 2000-2012       | 28,987             | 0.0              | 0.8        | 0.7        | 28,555            | 7.6          | 0.1        | 26,363            | 86.2                           | 12.0                    | 0.0               | 13.6        |
| Antofagasta                        | 2003-2010       | 5,812              | 0.0              | 4.0        | 0.7        | 5,537             | 14.8         | 0.1        | 4,717             | 86.0                           | 15.7                    | 0.0               | 13.2        |
| Biobio                             | 2003-2012       | 6,500              | 0.0              | 0.0        | 0.6        | 6,462             | 3.8          | 0.2        | 6,207             | 80.3                           | 20.8                    | 0.0               | 7.3         |
| Concepción                         | 2006-2010       | 8,647              | 0.0              | 0.0        | 0.5        | 8,600             | 7.3          | 0.1        | 7,961             | 87.3                           | 13.4                    | 0.0               | 17.7        |
| Los Rios                           | 2000-2012       | 8,028              | 0.0              | 0.0        | 0.9        | 7,956             | 5.9          | 0.2        | 7,478             | 90.0                           | 0.8                     | 0.0               | 14.6        |
| Colombian registries               | 2000-2014       | 63,402             | 3.1              | 1.5        | 1.2        | 59,740            | 5.0          | 0.9        | 56,245            | 89.9                           | 11.3                    | 0.0               | 21.0        |
| Bucaramanga                        | 2003-2013       | 2,986              | 0.5              | 1.7        | 3.4        | 2,816             | 7.3          | 0.8        | 2,587             | 95.5                           | 6.7                     | 0.0               | 0.1         |
| Cali                               | 2000-2014       | 48,360             | 1.4              | 0.0        | 1.2        | 47,112            | 4.8          | 0.8        | 44,484            | 89.2                           | 11.6                    | 0.0               | 23.6        |
| Manizales                          | 2003-2012       | 5,715              | 16.7             | 0.0        | 0.7        | 4,719             | 1.3          | 2.5        | 4,542             | 92.1                           | 10.7                    | 0.0               | 25.2        |
| Pasto                              | 2000-2012       | 6,341              | 4.7              | 13.9       | 1.1        | 5,093             | 8.7          | 0.3        | 4,632             | 91.6                           | 11.6                    | 0.0               | 3.4         |
| Costa Rica *                       | 2002-2014       | 72,900             | 0.0              | 4.1        | 1.4        | 68,900            | 8.4          | 0.8        | 62,536            | 90.1                           | 13.0                    | 0.0               | 0.0         |
| Cuba *                             | 2000-2012       | 193,196            | 0.0              | 0.0        | 0.2        | 192,755           | 32.3         | 2.5        | 125,696           | 91.8                           | 5.1                     | 2.6               | 0.0         |
| Ecuadorian registries              | 2000-2014       | 71,798             | 7.7              | 8.2        | 0.8        | 59,892            | 9.8          | 1.6        | 53,043            | 92.0                           | 9.9                     | 0.3               | 2.7         |
| Cuenca                             | 2000-2014       | 6,002              | 39.5             | 2.7        | 1.4        | 3,387             | 9.9          | 5.4        | 2,869             | 88.9                           | 12.7                    | 0.0               | 26.3        |
| Guayaquil                          | 2005-2013       | 20,091             | 0.1              | 6.8        | 0.7        | 18,560            | 7.7          | 4.0        | 16,388            | 89.9                           | 11.9                    | 0.0               | 0.0         |
| Loja                               | 2000-2013       | 3,633              | 0.2              | 10.6       | 1.7        | 3,182             | 2.9          | 0.0        | 3,091             | 85.8                           | 16.2                    | 4.5               | 0.0         |
| Manabí                             | 2000-2013       | 13,068             | 7.6              | 14.1       | 1.1        | 10,085            | 18.6         | 0.1        | 8,198             | 88.9                           | 12.6                    | 0.0               | 0.8         |
| Quito                              | 2000-2013       | 29,004             | 7.3              | 7.3        | 0.4        | 24,678            | 8.7          | 0.2        | 22,497            | 95.9                           | 6.4                     | 0.0               | 2.7         |
| Guadeloupe *                       | 2008-2013       | 8,896              | 0.0              | 12.0       | 0.3        | 7,802             | 0.0          | 0.2        | 7,787             | 99.1                           | 2.1                     | 0.0               | 57.7        |
| Martinique *                       | 2000-2012       | 16,066             | 0.0              | 0.0        | 0.1        | 16,053            | 0.0          | 1.7        | 15,779            | 97.3                           | 0.7                     | 7.3               | 0.1         |
| Mexico (Childhood) †               | 2008-2014       | 9,749              | 5.8              | 0.0        | 9.7        | 8,236             | 0.0          | 0.5        | 8,194             | 99.8                           | 3.9                     | 9.3               | 7.6         |
| Peru (Lima)                        | 2010-2012       | 19,078             | 0.1              | 0.0        | 0.7        | 18,929            | 8.9          | 0.1        | 17,226            | 93.9                           | 2.9                     | 0.0               | 10.2        |
| Puerto Rico *                      | 2000-2011       | 118,877            | 3.7              | 3.9        | 0.7        | 109,001           | 6.4          | 0.3        | 101,613           | 98.4                           | 3.4                     | 0.0               | 0.0         |
| Uruguay *                          | 2008-2012       | 36,616             | 0.0              | 9.6        | 0.7        | 32,836            | 15.5         | 0.1        | 27,716            | 85.0                           | 15.9                    | 0.0               | 0.0         |
| <b>AMERICA (North)</b>             |                 | <b>15,925,870</b>  | <b>0.7</b>       | <b>6.8</b> | <b>0.7</b> | <b>14,622,183</b> | <b>1.8</b>   | <b>0.3</b> | <b>14,320,034</b> | <b>97.7</b>                    | <b>3.0</b>              | <b>1.4</b>        | <b>0.0</b>  |
| Canadian registries                | 2000-2014       | 1,519,461          | 0.1              | 4.9        | 0.7        | 1,431,975         | 1.2          | 0.4        | 1,409,413         | 94.8                           | 5.5                     | 0.0               | 0.0         |
| Alberta                            | 2000-2014       | 175,759            | 0.2              | 5.0        | 0.8        | 165,199           | 0.3          | 0.3        | 164,125           | 97.2                           | 3.3                     | 0.0               | 0.0         |
| British Columbia                   | 2000-2014       | 286,167            | 0.4              | 10.3       | 2.0        | 249,881           | 1.3          | 0.8        | 244,678           | 97.7                           | 2.6                     | 0.0               | 0.0         |
| Manitoba                           | 2000-2014       | 73,660             | 0.2              | 6.2        | 0.8        | 68,359            | 1.2          | 0.2        | 67,356            | 95.5                           | 4.9                     | 0.0               | 0.0         |
| New Brunswick                      | 2000-2014       | 52,712             | 0.0              | 5.2        | 0.8        | 49,566            | 0.3          | 0.1        | 49,398            | 92.5                           | 0.5                     | 0.0               | 0.0         |
| Newfoundland & Labrador            | 2000-2014       | 39,227             | 0.2              | 15.1       | 1.6        | 32,611            | 1.5          | 0.2        | 32,074            | 96.6                           | 4.0                     | 0.0               | 0.0         |
| Nova Scotia                        | 2000-2014       | 68,454             | 0.5              | 5.2        | 0.8        | 63,996            | 0.7          | 0.3        | 63,377            | 92.7                           | 8.0                     | 0.0               | 0.0         |
| Ontario                            | 2000-2014       | 748,798            | 0.0              | 2.0        | 0.2        | 732,717           | 1.4          | 0.3        | 720,005           | 93.4                           | 7.3                     | 0.0               | 0.0         |
| Prince Edward Island               | 2000-2014       | 11,175             | 0.0              | 13.3       | 0.7        | 9,602             | 1.4          | 0.3        | 9,432             | 93.9                           | 6.7                     | 0.0               | 0.0         |
| Saskatchewan                       | 2000-2014       | 63,509             | 0.1              | 4.6        | 0.8        | 60,044            | 1.6          | 0.2        | 58,968            | 95.9                           | 4.6                     | 0.0               | 0.0         |
| US registries                      | 2000-2014       | 14,406,409         | 0.7              | 7.0        | 0.7        | 13,190,208        | 1.8          | 0.3        | 12,910,621        | 98.0                           | 2.8                     | 1.5               | 0.0         |
| Alabama                            | 2000-2014       | 295,831            | 0.7              | 7.5        | 0.6        | 269,706           | 1.7          | 0.3        | 264,284           | 97.3                           | 3.5                     | 0.0               | 0.0         |
| Alaska                             | 2000-2013       | 28,257             | 2.6              | 7.1        | 0.7        | 25,314            | 0.9          | 0.3        | 25,007            | 97.4                           | 3.8                     | 0.0               | 0.0         |
| Arkansas                           | 2000-2011       | 141,321            | 0.2              | 5.3        | 0.7        | 132,576           | 1.5          | 0.3        | 130,186           | 98.7                           | 2.0                     | 0.0               | 0.0         |
| California                         | 2000-2011       | 1,498,352          | 1.6              | 7.6        | 0.8        | 1,349,316         | 0.9          | 0.3        | 1,331,999         | 98.3                           | 2.3                     | 0.0               | 0.0         |
| Greater Bay Area                   | 2000-2014       | 378,403            | 1.1              | 8.9        | 0.9        | 337,510           | 1.1          | 0.3        | 332,601           | 98.8                           | 1.8                     | 7.0               | 0.0         |
| Greater California                 | 2000-2014       | 1,048,342          | 1.6              | 8.0        | 0.8        | 939,409           | 1.0          | 0.4        | 927,034           | 97.9                           | 2.7                     | 7.2               | 0.0         |
| Los Angeles                        | 2000-2014       | 457,090            | 1.6              | 6.8        | 0.9        | 414,805           | 0.9          | 0.4        | 409,577           | 98.6                           | 1.9                     | 13.8              | 0.0         |
| Colorado                           | 2000-2013       | 229,760            | 0.3              | 7.9        | 0.8        | 209,125           | 2.5          | 0.3        | 203,276           | 98.0                           | 2.5                     | 0.0               | 0.0         |
| Connecticut                        | 2000-2014       | 248,353            | 0.3              | 9.4        | 0.8        | 222,426           | 1.2          | 0.3        | 219,104           | 98.7                           | 2.1                     | 3.4               | 0.0         |
| Delaware                           | 2000-2014       | 62,508             | 0.3              | 9.0        | 0.7        | 56,259            | 1.8          | 0.2        | 55,117            | 98.6                           | 1.8                     | 0.0               | 0.0         |
| Florida                            | 2000-2013       | 1,197,135          | 0.1              | 6.6        | 0.7        | 1,108,272         | 2.5          | 0.4        | 1,076,407         | 98.4                           | 3.4                     | 0.0               | 0.0         |
| Georgia                            | 2000-2014       | 509,361            | 0.0              | 7.4        | 0.7        | 467,969           | 1.6          | 0.2        | 459,349           | 98.4                           | 2.4                     | 0.0               | 0.0         |
| Atlanta                            | 2000-2014       | 158,439            | 0.0              | 8.8        | 0.7        | 143,283           | 1.0          | 0.3        | 141,398           | 98.9                           | 1.9                     | 0.0               | 0.0         |
| Hawaii                             | 2000-2014       | 77,850             | 0.3              | 7.9        | 0.8        | 70,828            | 1.5          | 0.2        | 69,658            | 97.9                           | 2.7                     | 3.3               | 0.0         |
| Idaho                              | 2000-2014       | 83,533             | 0.6              | 7.6        | 0.7        | 76,058            | 2.5          | 0.3        | 73,943            | 98.1                           | 2.3                     | 0.0               | 0.0         |
| Indiana                            | 2000-2014       | 382,258            | 0.4              | 6.5        | 0.8        | 352,974           | 1.7          | 0.2        | 346,108           | 98.0                           | 2.5                     | 0.0               | 0.0         |
| Iowa                               | 2000-2014       | 201,188            | 0.6              | 6.1        | 0.8        | 185,890           | 1.4          | 0.3        | 182,804           | 97.7                           | 2.7                     | 1.6               | 0.0         |
| Kentucky                           | 2000-2014       | 293,909            | 0.0              | 6.4        | 0.8        | 272,834           | 1.1          | 0.3        | 269,263           | 97.2                           | 3.3                     | 1.5               | 0.0         |
| Louisiana                          | 2000-2014       | 277,105            | 0.3              | 5.6        | 0.7        | 258,597           | 1.3          | 0.3        | 254,391           | 98.1                           | 2.5                     | 2.4               | 0.0         |
| Maine                              | 2000-2013       | 93,405             | 0.1              | 7.7        | 0.8        | 85,383            | 1.8          | 0.2        | 83,632            | 97.8                           | 2.6                     | 0.0               | 0.0         |
| Massachusetts                      | 2000-2009       | 300,444            | 0.0              | 9.0        | 0.8        | 270,831           | 1.9          | 0.3        | 264,950           | 97.4                           | 3.0                     | 0.0               | 0.0         |
| Michigan                           | 2000-2013       | 606,401            | 0.4              | 6.9        | 0.7        | 558,367           | 1.2          | 0.3        | 550,144           | 97.3                           | 3.4                     | 0.0               | 0.0         |

Web-table 2: Data quality indicators, patients diagnosed during 2000-2014, by continent, country and registry: ALL CANCERS COMBINED

|                     | Calendar period | Patients submitted | Ineligible (%) ¶ |            |            | Eligible patients | Excluded (%) |            | Patients included | Data quality indicators (%) †† |                         |                   |            |
|---------------------|-----------------|--------------------|------------------|------------|------------|-------------------|--------------|------------|-------------------|--------------------------------|-------------------------|-------------------|------------|
|                     |                 |                    | Incomplete dates | In situ    | Other      |                   | DCO          | Other      |                   | MV                             | Non-specific morphology | Lost to follow-up | Censored   |
| Detroit             | 2000-2014       | 272,111            | 0.7              | 7.0        | 0.7        | 249,185           | 1.5          | 0.3        | 244,802           | 99.0                           | 1.5                     | 2.9               | 0.0        |
| Minnesota           | 2000-2013       | 295,491            | 0.0              | 7.5        | 0.7        | 271,158           | 2.2          | 0.4        | 264,266           | 99.9                           | 0.4                     | 0.0               | 0.0        |
| Mississippi         | 2002-2014       | 156,143            | 0.4              | 5.4        | 0.7        | 145,929           | 2.2          | 0.2        | 142,427           | 98.6                           | 2.1                     | 0.0               | 0.0        |
| Missouri            | 2000-2010       | 52,505             | 0.2              | 16.1       | 0.1        | 43,881            | 0.9          | 0.1        | 43,425            | 98.8                           | 1.5                     | 0.0               | 0.0        |
| Montana             | 2000-2014       | 65,370             | 1.0              | 7.0        | 0.7        | 59,669            | 2.8          | 0.3        | 57,871            | 98.4                           | 2.0                     | 0.0               | 0.0        |
| Nebraska            | 2000-2014       | 109,998            | 0.4              | 6.3        | 0.9        | 101,595           | 1.6          | 0.3        | 99,711            | 98.0                           | 2.4                     | 0.0               | 0.0        |
| New Hampshire       | 2000-2014       | 91,107             | 0.2              | 9.7        | 0.7        | 81,429            | 1.6          | 0.2        | 79,974            | 97.9                           | 2.6                     | 0.0               | 0.0        |
| New Jersey          | 2000-2014       | 597,167            | 0.9              | 8.8        | 0.8        | 534,993           | 1.3          | 0.2        | 526,669           | 98.4                           | 2.3                     | 30.8              | 0.0        |
| New Mexico          | 2000-2014       | 102,721            | 0.0              | 6.8        | 0.8        | 94,929            | 3.1          | 0.3        | 91,690            | 98.0                           | 3.2                     | 4.7               | 0.2        |
| New York            | 2000-2014       | 1,200,631          | 2.6              | 5.6        | 0.7        | 1,093,595         | 1.2          | 0.3        | 1,077,828         | 98.3                           | 2.3                     | 0.0               | 0.0        |
| New York City       | 2000-2014       | 442,697            | 3.2              | 5.7        | 0.8        | 399,486           | 1.0          | 0.3        | 394,233           | 98.9                           | 1.8                     | 0.0               | 0.0        |
| North Carolina      | 2000-2014       | 564,124            | 0.0              | 7.7        | 0.7        | 517,048           | 2.1          | 0.2        | 505,054           | 98.3                           | 2.3                     | 0.0               | 0.0        |
| Ohio                | 2000-2014       | 736,843            | 0.1              | 6.9        | 0.7        | 680,497           | 3.1          | 0.3        | 657,606           | 98.2                           | 2.9                     | 0.0               | 0.0        |
| Oklahoma            | 2000-2010       | 164,342            | 0.4              | 4.9        | 0.7        | 154,422           | 2.8          | 0.2        | 149,742           | 97.5                           | 4.5                     | 0.0               | 0.0        |
| Oregon              | 2000-2013       | 223,579            | 0.1              | 8.5        | 0.8        | 202,539           | 1.9          | 0.2        | 198,288           | 96.5                           | 4.3                     | 0.0               | 0.0        |
| Pennsylvania        | 2000-2014       | 912,948            | 0.9              | 7.2        | 0.7        | 832,151           | 2.0          | 0.2        | 813,515           | 98.3                           | 2.2                     | 0.0               | 0.0        |
| Rhode Island        | 2000-2014       | 73,975             | 0.2              | 8.0        | 0.8        | 67,349            | 1.7          | 0.3        | 66,032            | 97.7                           | 2.8                     | 0.0               | 0.0        |
| South Carolina      | 2000-2014       | 287,765            | 0.0              | 7.7        | 0.6        | 263,907           | 2.3          | 0.3        | 257,044           | 97.2                           | 3.4                     | 0.0               | 0.0        |
| Tennessee           | 2000-2011       | 290,481            | 0.4              | 5.7        | 0.7        | 270,639           | 2.4          | 0.3        | 263,422           | 98.4                           | 2.2                     | 0.0               | 0.0        |
| Texas               | 2000-2013       | 1,085,685          | 1.2              | 5.4        | 0.7        | 1,006,482         | 2.7          | 0.3        | 976,343           | 97.1                           | 4.5                     | 0.0               | 0.0        |
| Utah                | 2000-2014       | 105,288            | 0.3              | 9.4        | 0.9        | 94,203            | 0.4          | 0.3        | 93,552            | 98.2                           | 2.4                     | 5.2               | 0.1        |
| Vermont             | 2000-2013       | 40,323             | 0.2              | 9.1        | 0.6        | 36,331            | 1.7          | 0.2        | 35,639            | 98.2                           | 2.3                     | 0.0               | 0.0        |
| Washington          | 2000-2008       | 232,387            | 0.6              | 8.0        | 0.8        | 210,735           | 1.1          | 0.2        | 207,962           | 97.9                           | 2.6                     | 0.0               | 0.0        |
| Seattle             | 2000-2014       | 282,982            | 0.5              | 9.3        | 0.8        | 253,203           | 0.7          | 0.2        | 250,792           | 98.1                           | 2.2                     | 1.7               | 0.0        |
| West Virginia       | 2000-2014       | 134,334            | 0.7              | 5.6        | 0.7        | 124,835           | 1.4          | 0.3        | 122,752           | 96.6                           | 4.1                     | 0.0               | 0.0        |
| Wisconsin           | 2000-2013       | 328,552            | 0.6              | 6.2        | 0.7        | 303,752           | 2.6          | 0.3        | 294,989           | 98.4                           | 2.3                     | 0.0               | 0.0        |
| Wyoming             | 2000-2013       | 27,679             | 0.2              | 7.2        | 0.8        | 25,415            | 0.5          | 0.4        | 25,198            | 98.4                           | 2.1                     | 0.0               | 0.0        |
| <b>ASIA</b>         |                 | <b>6,595,363</b>   | <b>0.6</b>       | <b>3.4</b> | <b>0.4</b> | <b>6,298,518</b>  | <b>4.7</b>   | <b>0.4</b> | <b>5,976,959</b>  | <b>88.6</b>                    | <b>11.5</b>             | <b>0.4</b>        | <b>1.0</b> |
| Chinese registries  | 2003-2013       | 610,729            | 0.8              | 0.2        | 0.2        | 603,861           | 1.4          | 0.1        | 594,533           | 66.2                           | 41.8                    | 3.2               | 0.1        |
| Beijing             | 2003-2013       | 186,434            | 0.0              | 0.0        | 0.2        | 186,014           | 0.9          | 0.1        | 184,109           | 73.8                           | 27.2                    | 6.9               | 0.2        |
| Changle             | 2003-2013       | 12,370             | 4.4              | 0.2        | 0.2        | 11,779            | 0.9          | 0.7        | 11,593            | 57.9                           | 52.4                    | 1.6               | 0.0        |
| Cixian              | 2003-2013       | 18,135             | 0.0              | 1.7        | 0.0        | 17,821            | 2.5          | 0.0        | 17,373            | 80.4                           | 20.7                    | 0.0               | 0.0        |
| Dafeng              | 2003-2013       | 17,237             | 0.0              | 0.0        | 0.0        | 17,232            | 0.3          | 0.0        | 17,179            | 66.5                           | 46.9                    | 0.0               | 0.0        |
| Dalian              | 2003-2013       | 65,399             | 0.0              | 0.0        | 0.1        | 65,337            | 6.2          | 0.1        | 61,256            | 76.8                           | 26.5                    | 0.0               | 0.1        |
| Donghai             | 2003-2013       | 16,250             | 0.2              | 0.0        | 0.0        | 16,214            | 2.8          | 0.2        | 15,735            | 45.2                           | 59.3                    | 4.2               | 0.0        |
| Feicheng            | 2003-2013       | 22,861             | 0.0              | 0.3        | 0.0        | 22,791            | 0.3          | 0.1        | 22,691            | 70.2                           | 32.4                    | 3.0               | 0.0        |
| Ganyu               | 2003-2013       | 16,775             | 0.0              | 0.0        | 0.0        | 16,771            | 0.2          | 0.3        | 16,679            | 40.4                           | 65.1                    | 1.6               | 0.1        |
| Guanyun             | 2004-2013       | 15,043             | 0.0              | 0.0        | 0.0        | 15,042            | 1.8          | 0.2        | 14,754            | 54.6                           | 72.9                    | 1.9               | 0.0        |
| Haimen              | 2003-2013       | 33,116             | 0.0              | 0.0        | 0.6        | 32,921            | 1.0          | 0.0        | 32,566            | 50.6                           | 51.5                    | 0.4               | 0.0        |
| Haining             | 2003-2013       | 14,103             | 0.0              | 0.1        | 0.1        | 14,069            | 0.9          | 0.2        | 13,909            | 61.4                           | 61.0                    | 0.5               | 0.0        |
| Jianhu              | 2003-2013       | 25,370             | 0.0              | 0.0        | 0.0        | 25,368            | 0.0          | 0.0        | 25,358            | 67.6                           | 80.9                    | 5.5               | 0.0        |
| Jiashan             | 2003-2013       | 11,557             | 0.0              | 0.2        | 0.2        | 11,508            | 0.3          | 0.1        | 11,466            | 68.2                           | 33.2                    | 0.5               | 0.0        |
| Jintan              | 2003-2013       | 14,012             | 0.0              | 0.1        | 0.3        | 13,955            | 0.9          | 0.2        | 13,800            | 40.1                           | 61.0                    | 2.0               | 0.0        |
| Lianyungang         | 2008-2013       | 10,225             | 0.0              | 0.0        | 0.2        | 10,199            | 1.5          | 0.1        | 10,041            | 71.7                           | 46.1                    | 13.1              | 0.2        |
| Linzhou             | 2003-2013       | 26,036             | 0.0              | 0.4        | 0.0        | 25,924            | 1.3          | 0.1        | 25,578            | 79.4                           | 21.9                    | 0.0               | 0.0        |
| Qidong              | 2003-2013       | 35,740             | 0.0              | 0.0        | 0.1        | 35,718            | 0.1          | 0.1        | 35,672            | 47.5                           | 55.0                    | 0.8               | 0.0        |
| Sihui               | 2003-2013       | 6,474              | 2.5              | 0.0        | 0.2        | 6,296             | 5.2          | 0.1        | 5,962             | 42.3                           | 68.0                    | 3.0               | 0.5        |
| Taixing             | 2003-2013       | 26,553             | 15.0             | 0.0        | 0.0        | 22,573            | 0.1          | 0.1        | 22,533            | 56.8                           | 69.9                    | 3.3               | 0.0        |
| Yangzhong           | 2003-2013       | 10,272             | 0.0              | 0.0        | 0.0        | 10,267            | 0.2          | 0.1        | 10,233            | 70.5                           | 93.8                    | 0.0               | 0.0        |
| Zhongshan           | 2003-2013       | 26,767             | 0.0              | 2.0        | 0.6        | 26,062            | 0.0          | 0.1        | 26,046            | 69.7                           | 33.4                    | 0.1               | 0.0        |
| Cyprus *            | 2004-2014       | 25,086             | 1.4              | 2.6        | 0.8        | 23,880            | 9.0          | 0.5        | 21,610            | 98.9                           | 1.8                     | 0.0               | 34.8       |
| Hong Kong *         | 2005-2014       | 78,127             | 3.8              | 0.0        | 0.0        | 75,146            | 0.4          | 0.2        | 74,721            | 96.6                           | 0.0                     | 5.5               | 0.0        |
| Indian registries   | 2000-2014       | 5,048              | 3.2              | 0.0        | 0.0        | 4,882             | 1.7          | 0.6        | 4,774             | 82.1                           | 25.1                    | 1.8               | 0.1        |
| Guwahati            | 2004-2014       | 657                | 23.7             | 0.0        | 0.0        | 501               | 4.6          | 1.4        | 471               | 96.2                           | 3.8                     | 8.9               | 1.1        |
| Karunagappally      | 2000-2014       | 4,391              | 0.2              | 0.0        | 0.0        | 4,381             | 1.3          | 0.5        | 4,303             | 80.6                           | 27.4                    | 1.0               | 0.0        |
| Iran (Golestan)     | 2006-2008       | 1,187              | 0.0              | 0.0        | 0.5        | 1,181             | 8.9          | 3.1        | 1,039             | 82.1                           | 17.9                    | 8.9               | 0.0        |
| Israel *            | 2000-2013       | 282,191            | 0.0              | 7.3        | 2.2        | 255,359           | 4.8          | 0.4        | 241,881           | 96.8                           | 4.2                     | 0.0               | 0.0        |
| Japanese registries | 2000-2014       | 2,237,861          | 1.0              | 4.8        | 0.5        | 2,096,697         | 12.4         | 0.1        | 1,834,894         | 91.4                           | 11.3                    | 0.0               | 1.7        |
| Aichi               | 2003-2013       | 338,135            | 0.3              | 4.9        | 0.6        | 318,572           | 10.3         | 0.1        | 285,369           | 94.2                           | 7.5                     | 0.0               | 2.0        |
| Akita               | 2010-2014       | 38,096             | 1.2              | 7.7        | 0.8        | 34,388            | 0.0          | 2.4        | 33,564            | 88.9                           | 14.1                    | 0.0               | 37.9       |
| Ehime               | 2007-2013       | 64,541             | 0.1              | 6.7        | 0.9        | 59,577            | 15.1         | 0.1        | 50,516            | 92.5                           | 8.9                     | 0.0               | 0.0        |
| Fukui               | 2003-2009       | 29,282             | 0.3              | 4.7        | 0.8        | 27,583            | 2.6          | 0.1        | 26,828            | 89.5                           | 12.1                    | 0.0               | 1.8        |
| Gunma               | 2003-2012       | 94,334             | 16.6             | 3.3        | 0.2        | 75,424            | 21.8         | 0.2        | 58,823            | 86.2                           | 3.5                     | 0.0               | 1.3        |
| Hiroshima           | 2004-2008       | 81,114             | 0.3              | 7.7        | 1.1        | 73,733            | 7.7          | 0.0        | 68,067            | 98.9                           | 1.5                     | 0.0               | 0.4        |
| Hyogo               | 2007-2012       | 174,437            | 0.5              | 5.5        | 0.8        | 162,581           | 21.6         | 0.1        | 127,335           | 94.0                           | 8.0                     | 0.0               | 1.1        |
| Ibaraki             | 2006-2012       | 99,990             | 0.3              | 5.3        | 0.7        | 93,684            | 14.9         | 0.1        | 79,698            | 91.1                           | 15.6                    | 0.0               | 1.0        |
| Kanagawa            | 2000-2013       | 462,254            | 0.0              | 3.7        | 0.2        | 444,260           | 14.1         | 0.2        | 380,845           | 89.0                           | 22.5                    | 0.0               | 0.0        |
| Miyagi              | 2000-2010       | 128,742            | 1.3              | 7.1        | 0.1        | 117,825           | 8.8          | 0.1        | 107,308           | 91.9                           | 8.8                     | 0.0               | 1.3        |
| Niigata             | 2000-2013       | 187,256            | 0.1              | 4.3        | 0.9        | 177,292           | 9.3          | 0.2        | 160,564           | 90.1                           | 0.9                     | 0.0               | 0.0        |
| Osaka               | 2000-2008       | 318,685            | 0.0              | 3.2        | 0.5        | 306,736           | 12.1         | 0.1        | 269,366           | 91.0                           | 12.0                    | 0.0               | 2.8        |
| Saga                | 2006-2013       | 34,109             | 0.4              | 5.7        | 0.8        | 31,747            | 9.3          | 0.1        | 28,764            | 90.6                           | 11.0                    | 0.0               | 0.0        |
| Tochigi             | 2006-2013       | 82,181             | 0.4              | 5.8        | 0.8        | 76,508            | 11.9         | 0.1        | 67,368            | 93.5                           | 8.1                     | 0.0               | 0.8        |
| Yamagata            | 2003-2013       | 80,835             | 0.5              | 6.5        | 0.6        | 74,704            | 5.5          | 0.0        | 70,538            | 90.0                           | 12.3                    | 0.0               | 0.4        |
| Yamanashi           | 2008-2012       | 23,870             | 0.4              | 6.1        | 1.0        | 22,083            | 9.7          | 0.0        | 19,941            | 91.0                           | 10.8                    | 0.0               | 0.3        |
| Jordan *            | 2000-2014       | 43,442             | 0.2              | 1.2        | 1.5        | 42,179            | 0.2          | 1.6        | 41,433            | 99.1                           | 3.0                     | 5.9               | 0.0        |
| Korea * ‡           | 2000-2014       | 1,770,463          | 0.5              | 0.0        | 0.0        | 1,762,176         | 0.0          | 0.1        | 1,760,804         | 93.1                           | 7.8                     | 0.0               | 0.0        |
| Kuwait *            | 2000-2013       | 8,931              | 0.0              | 1.4        | 1.1        | 8,710             | 2.3          | 0.3        | 8,484             | 99.8                           | 0.4                     | 1.2               | 0.0        |
| Malaysia (Penang)   | 2000-2013       | 19,612             | 0.3              | 0.0        | 0.1        | 19,527            | 1.6          | 2.1        | 18,805            | 94.2                           | 9.5                     | 0.0               | 13.0       |
| Mongolia *          | 2003-2014       | 1,025              | 0.0              | 1.1        | 0.0        | 1,014             | 0.3          | 1.2        | 999               | 77.0                           | 4.1                     | 7.6               | 0.0        |
| Qatar *             | 2000-2014       | 7,940              | 0.0              | 1.0        | 1.0        | 7,778             | 1.0          | 0.7        | 7,642             | 95.4                           | 6.3                     | 0.0               | 51.0       |
| Singapore *         | 2000-2014       | 122,461            | 0.0              | 7.0        | 1.9        | 111,495           | 1.1          | 0.3        | 109,992           | 91.7                           | 1.9                     | 0.0               | 0.0        |
| Taiwan *            | 2000-2014       | 941,313            | 0.1              | 8.6        | 0.1        | 859,169           | 0.0          | 0.1        | 858,683           | 86.6                           | 0.5                     | 0.0               | 0.0        |

Web-table 2: Data quality indicators, patients diagnosed during 2000-2014, by continent, country and registry: ALL CANCERS COMBINED

|                                | Calendar period | Patients submitted | Ineligible (%) ¶ |            |            | Excluded (%) ¶¶   |            |            | Data quality indicators (%) ¶¶ |             |                         |                   |            |
|--------------------------------|-----------------|--------------------|------------------|------------|------------|-------------------|------------|------------|--------------------------------|-------------|-------------------------|-------------------|------------|
|                                |                 |                    | Incomplete dates | In situ    | Other      | Eligible patients | DCO        | Other      | Patients included              | MV          | Non-specific morphology | Lost to follow-up | Censored   |
| Thai registries                | 2000-2014       | 183,776            | 0.0              | 0.3        | 0.5        | 182,455           | 3.8        | 8.7        | 159,528                        | 68.6        | 34.0                    | 0.0               | 3.0        |
| Bangkok                        | 2000-2012       | 89,386             | 0.0              | 0.5        | 0.6        | 88,405            | 3.7        | 17.6       | 69,577                         | 68.7        | 34.5                    | 0.0               | 0.0        |
| Khon Kaen                      | 2000-2014       | 29,025             | 0.0              | 0.0        | 0.2        | 28,954            | 2.7        | 0.4        | 28,074                         | 63.2        | 38.1                    | 0.0               | 4.5        |
| Lampang                        | 2000-2014       | 19,944             | 0.0              | 0.0        | 0.0        | 19,941            | 4.2        | 0.3        | 19,059                         | 69.0        | 32.4                    | 0.0               | 0.1        |
| Lamphun                        | 2000-2014       | 10,143             | 0.0              | 0.0        | 0.0        | 10,143            | 6.0        | 0.5        | 9,481                          | 60.9        | 40.6                    | 0.0               | 0.0        |
| Lopburi                        | 2000-2014       | 16,640             | 0.0              | 0.0        | 0.6        | 16,534            | 6.1        | 0.5        | 15,455                         | 64.4        | 39.5                    | 0.0               | 20.9       |
| Songkhla                       | 2000-2014       | 18,638             | 0.0              | 0.0        | 0.9        | 18,478            | 3.0        | 0.3        | 17,882                         | 83.6        | 19.3                    | 0.3               | 1.4        |
| Turkish registries             | 2000-2013       | 256,171            | 1.5              | 2.7        | 0.9        | 243,009           | 1.9        | 0.5        | 237,137                        | 94.7        | 7.9                     | 0.2               | 3.8        |
| Ankara                         | 2008-2012       | 69,091             | 0.0              | 1.5        | 1.3        | 67,133            | 0.7        | 0.4        | 66,386                         | 99.0        | 3.9                     | 0.0               | 1.2        |
| Antalya                        | 2006-2012       | 19,161             | 0.3              | 7.2        | 0.4        | 17,658            | 0.7        | 0.5        | 17,445                         | 95.1        | 6.9                     | 0.0               | 1.1        |
| Bursa                          | 2006-2012       | 25,300             | 4.3              | 0.0        | 0.9        | 23,989            | 3.2        | 0.4        | 23,104                         | 92.3        | 11.0                    | 0.0               | 0.0        |
| Edirne                         | 2006-2012       | 5,347              | 4.3              | 0.0        | 0.8        | 5,074             | 6.0        | 0.4        | 4,748                          | 87.3        | 15.2                    | 0.0               | 0.0        |
| Erzurum                        | 2006-2012       | 7,034              | 1.4              | 0.6        | 0.8        | 6,837             | 1.1        | 0.9        | 6,701                          | 88.4        | 15.9                    | 0.0               | 1.4        |
| Eskisehir                      | 2006-2012       | 8,131              | 0.0              | 0.2        | 1.4        | 8,003             | 1.7        | 0.4        | 7,840                          | 91.7        | 1.1                     | 1.0               | 0.3        |
| Izmir                          | 2000-2013       | 98,312             | 2.4              | 4.1        | 0.6        | 91,265            | 2.6        | 0.6        | 88,307                         | 94.0        | 8.7                     | 0.0               | 8.8        |
| Samsun                         | 2006-2012       | 14,035             | 0.0              | 1.8        | 0.7        | 13,689            | 2.1        | 0.3        | 13,360                         | 92.4        | 10.7                    | 2.0               | 0.0        |
| Trabzon                        | 2006-2012       | 9,760              | 0.6              | 2.9        | 0.6        | 9,361             | 1.1        | 0.1        | 9,246                          | 90.1        | 15.3                    | 0.0               | 0.9        |
| <b>EUROPE</b>                  |                 | <b>17,057,088</b>  | <b>0.1</b>       | <b>7.0</b> | <b>2.1</b> | <b>15,481,564</b> | <b>2.8</b> | <b>0.3</b> | <b>14,991,316</b>              | <b>94.0</b> | <b>3.9</b>              | <b>0.9</b>        | <b>2.1</b> |
| Austria *                      | 2000-2014       | 486,379            | 0.0              | 7.4        | 1.2        | 444,735           | 6.1        | 1.1        | 412,683                        | 98.0        | 4.9                     | 0.0               | 0.0        |
| Belarus (Childhood) †          | 2000-2014       | 1,740              | 0.0              | 0.0        | 0.0        | 1,740             | 0.6        | 2.5        | 1,687                          | 97.9        | 2.5                     | 1.5               | 0.0        |
| Belgium *                      | 2004-2014       | 616,737            | 0.0              | 11.4       | 0.2        | 545,373           | 0.0        | 0.2        | 544,110                        | 98.4        | 2.0                     | 1.1               | 0.0        |
| Bulgaria *                     | 2000-2014       | 299,563            | 0.0              | 0.0        | 0.1        | 299,333           | 8.5        | 0.0        | 273,868                        | 89.2        | 1.4                     | 0.1               | 0.0        |
| Croatia *                      | 2000-2014       | 246,883            | 0.0              | 3.5        | 0.2        | 237,793           | 6.2        | 0.1        | 222,776                        | 82.9        | 0.5                     | 0.0               | 0.0        |
| Czech Republic *               | 2000-2014       | 640,594            | 0.0              | 7.5        | 1.6        | 582,748           | 1.3        | 0.4        | 572,368                        | 90.3        | 1.5                     | 0.0               | 0.0        |
| Denmark *                      | 2000-2014       | 366,310            | 0.0              | 0.0        | 0.2        | 365,525           | 0.0        | 0.1        | 365,105                        | 96.3        | 6.8                     | 0.2               | 0.0        |
| Estonia *                      | 2000-2012       | 64,038             | 0.0              | 1.8        | 0.7        | 62,396            | 3.9        | 0.2        | 59,848                         | 89.2        | 2.0                     | 0.3               | 0.0        |
| Finland *                      | 2000-2014       | 328,513            | 0.6              | 5.4        | 0.9        | 306,077           | 3.8        | 0.1        | 294,268                        | 95.8        | 3.2                     | 0.1               | 0.0        |
| French registries              | 2000-2012       | 466,020            | 0.2              | 0.0        | 0.3        | 463,588           | 0.0        | 0.6        | 460,927                        | 96.1        | 0.6                     | 1.8               | 0.1        |
| Bas-Rhin                       | 2000-2010       | 48,025             | 0.0              | 0.0        | 0.3        | 47,859            | 0.0        | 0.3        | 47,696                         | 96.2        | 0.3                     | 1.1               | 0.0        |
| Basse Normandie                | 2002-2010       | 7,545              | 0.0              | 0.0        | 0.1        | 7,540             | 0.0        | 0.0        | 7,538                          | 100.0       | 0.2                     | 0.1               | 0.0        |
| Burgundy Digestive             | 2000-2010       | 13,703             | 0.0              | 0.0        | 0.0        | 13,697            | 0.0        | 0.4        | 13,647                         | 86.0        | 0.4                     | 0.9               | 0.0        |
| Calvados                       | 2000-2010       | 17,957             | 0.0              | 0.0        | 0.0        | 17,951            | 0.0        | 0.1        | 17,941                         | 96.9        | 0.8                     | 0.4               | 0.0        |
| Calvados Digestive             | 2000-2010       | 7,889              | 0.1              | 0.0        | 0.1        | 7,881             | 0.0        | 0.1        | 7,873                          | 83.6        | 3.8                     | 1.2               | 0.0        |
| Côte-d'Or Gynaecologic         | 2000-2010       | 4,896              | 0.9              | 0.0        | 0.0        | 4,853             | 0.0        | 1.0        | 4,803                          | 99.2        | 0.0                     | 2.7               | 0.0        |
| Côte-d'Or Haematopoietic       | 2000-2010       | 3,409              | 0.0              | 0.0        | 0.1        | 3,407             | 0.0        | 0.0        | 3,407                          | 100.0       | 0.1                     | 0.3               | 0.0        |
| Doubs                          | 2000-2010       | 23,159             | 0.0              | 0.0        | 0.3        | 23,099            | 0.0        | 0.2        | 23,060                         | 97.1        | 0.2                     | 0.9               | 0.0        |
| Finistère                      | 2005-2010       | 7,230              | 0.1              | 0.0        | 0.0        | 7,223             | 0.0        | 0.4        | 7,192                          | 90.8        | 0.3                     | 1.8               | 0.0        |
| Gironde CNS                    | 2000-2010       | 1,253              | 1.6              | 0.0        | 2.6        | 1,201             | 0.0        | 1.2        | 1,187                          | 84.8        | 0.8                     | 3.2               | 0.0        |
| Gironde General                | 2005-2010       | 20,416             | 1.9              | 0.0        | 0.3        | 19,966            | 0.0        | 0.4        | 19,886                         | 95.4        | 0.8                     | 5.0               | 0.0        |
| Gironde Haematopoietic         | 2002-2010       | 6,949              | 0.0              | 0.0        | 0.1        | 6,945             | 0.0        | 0.2        | 6,930                          | 100.0       | 0.3                     | 3.2               | 0.0        |
| Haut-Rhin                      | 2000-2010       | 32,832             | 0.1              | 0.0        | 0.3        | 32,723            | 0.0        | 0.6        | 32,543                         | 97.9        | 0.4                     | 2.3               | 0.0        |
| Haute-Vienne                   | 2009-2009       | 1,896              | 0.0              | 0.0        | 0.1        | 1,894             | 0.0        | 0.4        | 1,886                          | 97.0        | 0.5                     | 2.1               | 0.0        |
| Hérault                        | 2000-2010       | 47,093             | 0.0              | 0.0        | 0.3        | 46,946            | 0.0        | 0.7        | 46,621                         | 96.2        | 0.3                     | 2.2               | 0.0        |
| Isère                          | 2000-2010       | 49,588             | 0.0              | 0.0        | 0.3        | 49,458            | 0.0        | 1.0        | 48,968                         | 96.1        | 0.3                     | 0.8               | 0.0        |
| Lille Metro                    | 2008-2010       | 9,208              | 0.0              | 0.0        | 0.3        | 9,180             | 0.0        | 0.2        | 9,164                          | 93.6        | 0.4                     | 1.2               | 0.0        |
| Loire-Atlantique               | 2000-2010       | 85,590             | 0.7              | 0.0        | 0.3        | 84,777            | 0.0        | 1.2        | 83,792                         | 97.1        | 0.6                     | 2.4               | 0.0        |
| Manche                         | 2000-2010       | 21,678             | 0.0              | 0.0        | 0.4        | 21,602            | 0.0        | 0.2        | 21,555                         | 95.9        | 0.8                     | 1.6               | 0.0        |
| Somme                          | 2000-2010       | 24,404             | 0.0              | 0.0        | 0.0        | 24,395            | 0.0        | 0.5        | 24,265                         | 96.0        | 1.1                     | 2.9               | 0.0        |
| Tarn                           | 2000-2010       | 19,158             | 0.0              | 0.0        | 0.3        | 19,110            | 0.0        | 0.1        | 19,093                         | 95.9        | 1.5                     | 1.2               | 0.0        |
| France Childhood Haem †        | 2000-2012       | 7,659              | 0.0              | 0.0        | 3.3        | 7,404             | 0.0        | 0.0        | 7,403                          | 100.0       | 0.0                     | 0.0               | 3.2        |
| France Childhood Solid †       | 2000-2012       | 4,483              | 0.0              | 0.0        | 0.1        | 4,477             | 0.0        | 0.0        | 4,477                          | 98.8        | 1.6                     | 0.0               | 2.7        |
| German registries              | 2000-2014       | 1,925,070          | 0.4              | 4.5        | 1.0        | 1,811,465         | 10.3       | 0.2        | 1,621,312                      | 97.5        | 0.7                     | 0.3               | 17.7       |
| Brandenburg                    | 2000-2014       | 182,153            | 0.0              | 6.4        | 0.8        | 169,127           | 9.1        | 0.1        | 153,566                        | 96.8        | 0.6                     | 0.0               | 21.4       |
| Bremen                         | 2000-2013       | 50,512             | 0.0              | 7.6        | 1.7        | 45,800            | 6.9        | 0.2        | 42,545                         | 96.1        | 0.3                     | 3.2               | 0.0        |
| Hamburg                        | 2000-2013       | 109,772            | 0.0              | 0.0        | 0.5        | 109,250           | 8.6        | 0.2        | 99,646                         | 99.2        | 1.0                     | 4.1               | 0.0        |
| Lower Saxony                   | 2003-2013       | 443,403            | 1.8              | 0.0        | 0.8        | 432,143           | 11.5       | 0.2        | 381,262                        | 99.7        | 0.5                     | 0.0               | 24.6       |
| Mecklenburg-W. Pomerania       | 2000-2014       | 123,992            | 0.0              | 7.5        | 0.9        | 113,597           | 7.8        | 0.1        | 104,686                        | 96.4        | 0.5                     | 0.0               | 21.3       |
| Rhineland Palatinate           | 2000-2013       | 263,437            | 0.0              | 6.0        | 1.2        | 244,559           | 12.7       | 0.2        | 212,995                        | 94.3        | 0.2                     | 0.0               | 25.6       |
| Saarland                       | 2000-2012       | 67,919             | 0.0              | 6.2        | 1.4        | 62,793            | 5.7        | 0.3        | 59,013                         | 98.4        | 2.1                     | 0.0               | 0.0        |
| Saxony                         | 2000-2014       | 318,162            | 0.0              | 6.4        | 0.9        | 295,048           | 7.1        | 0.1        | 273,740                        | 96.0        | 1.1                     | 0.0               | 20.0       |
| Schleswig-Holstein             | 2000-2012       | 209,273            | 0.0              | 7.8        | 1.7        | 189,471           | 14.7       | 0.3        | 161,182                        | 99.0        | 1.2                     | 0.0               | 0.0        |
| Thuringia                      | 2000-2014       | 156,447            | 0.0              | 3.6        | 0.7        | 149,677           | 11.3       | 0.1        | 132,677                        | 97.4        | 0.5                     | 0.0               | 22.0       |
| Gibraltar *                    | 2000-2010       | 732                | 13.0             | 11.7       | 1.1        | 543               | 0.2        | 1.7        | 533                            | 99.6        | 0.8                     | 0.0               | 41.7       |
| Greece (National Paediatric) † | 2000-2014       | 1,743              | 0.6              | 0.0        | 0.0        | 1,733             | 0.0        | 0.4        | 1,726                          | 99.9        | 0.1                     | 0.8               | 0.2        |
| Iceland *                      | 2000-2014       | 15,245             | 0.0              | 1.4        | 0.8        | 14,918            | 0.8        | 0.1        | 14,782                         | 96.5        | 3.9                     | 0.0               | 0.0        |
| Ireland *                      | 2000-2013       | 240,962            | 0.0              | 16.3       | 0.9        | 199,552           | 1.5        | 0.2        | 196,331                        | 92.2        | 1.7                     | 0.0               | 0.0        |
| Italian registries             | 2000-2014       | 1,452,003          | 0.0              | 1.8        | 0.8        | 1,414,476         | 0.7        | 0.3        | 1,400,117                      | 87.5        | 14.1                    | 0.7               | 0.8        |
| Alto Adige                     | 2000-2010       | 21,777             | 0.0              | 0.0        | 0.5        | 21,662            | 1.2        | 0.2        | 21,349                         | 92.6        | 7.7                     | 0.0               | 0.0        |
| Barletta-Andria-Trani          | 2006-2012       | 9,672              | 0.0              | 0.0        | 0.3        | 9,647             | 1.5        | 0.3        | 9,474                          | 85.1        | 15.6                    | 1.1               | 0.0        |
| Basilicata                     | 2006-2010       | 11,504             | 0.0              | 0.0        | 0.3        | 11,466            | 0.0        | 0.3        | 11,431                         | 83.5        | 17.5                    | 0.3               | 0.6        |
| Bergamo                        | 2007-2012       | 30,447             | 0.0              | 0.0        | 0.3        | 30,370            | 0.0        | 0.3        | 30,280                         | 88.0        | 13.6                    | 0.5               | 0.0        |
| Biella-Vercelli                | 2000-2010       | 16,556             | 0.0              | 5.0        | 1.5        | 15,487            | 1.3        | 0.3        | 15,227                         | 88.3        | 12.4                    | 0.3               | 1.4        |
| Brescia                        | 2000-2008       | 44,753             | 0.0              | 0.0        | 0.2        | 44,673            | 0.0        | 0.3        | 44,521                         | 80.2        | 22.2                    | 0.5               | 0.0        |
| Brindisi                       | 2006-2008       | 4,481              | 0.0              | 0.0        | 0.2        | 4,473             | 0.0        | 0.4        | 4,454                          | 84.2        | 16.5                    | 0.4               | 1.5        |
| Caserta                        | 2008-2010       | 8,571              | 0.0              | 0.0        | 0.2        | 8,553             | 0.0        | 0.6        | 8,499                          | 86.3        | 14.4                    | 0.3               | 5.6        |
| Catania-Messina-Enna           | 2003-2012       | 66,584             | 0.0              | 0.0        | 0.2        | 66,461            | 1.5        | 0.2        | 65,278                         | 87.6        | 17.7                    | 0.0               | 1.8        |
| Catanzaro                      | 2003-2009       | 7,189              | 0.0              | 0.0        | 0.2        | 7,172             | 0.0        | 0.4        | 7,141                          | 87.3        | 13.6                    | 0.2               | 0.3        |
| Como                           | 2003-2011       | 24,128             | 0.0              | 0.0        | 0.2        | 24,079            | 0.1        | 0.2        | 24,014                         | 90.4        | 10.3                    | 0.7               | 0.0        |
| Cremona                        | 2005-2010       | 11,376             | 0.0              | 0.0        | 0.2        | 11,352            | 0.9        | 0.3        | 11,215                         | 84.7        | 16.3                    | 0.9               | 0.0        |
| Ferrara                        | 2000-2011       | 25,944             | 0.0              | 0.0        | 0.2        | 25,900            | 0.3        | 0.3        | 25,735                         | 88.0        | 12.6                    | 0.9               | 0.0        |
| Friuli-Venezia-Giulia          | 2000-2010       | 73,002             | 0.0              | 0.0        | 0.3        | 72,769            | 2.8        | 0.4        | 70,486                         | 89.7        | 11.0                    | 0.4               | 0.0        |
| Genoa                          | 2000-2009       | 56,194             | 0.0              | 5.1        | 2.6        | 51,859            | 0.1        | 0.2        | 51,701                         | 86.8        | 13.9                    | 0.0               | 0.0        |
| Latina                         | 2000-2011       | 21,814             | 0.0              | 0.0        | 0.3        | 21,757            | 0.0        | 0.6        | 21,624                         | 82.3        | 18.5                    | 1.9               | 1.6        |
| Lecce                          | 2003-2008       | 18,148             | 0.0              | 0.0        | 0.3        | 18,094            | 0.0        | 0.5        | 18,000                         | 82.6        | 18.8                    | 0.3               | 1.3        |
| Mantova                        | 2000-2010       | 21,481             | 0.0              | 0.0        | 0.3        | 21,421            | 1.2        | 0.5        | 21,069                         | 87.3        | 16.1                    | 0.0               | 0.0        |
| Milano                         | 2000-2012       | 118,094            | 0.0              | 0.0        | 0.2        | 117,813           | 0.1        | 0.3        | 117,392                        | 88.3        | 12.8                    | 3.0               | 0.5        |

Web-table 2: Data quality indicators, patients diagnosed during 2000-2014, by continent, country and registry: ALL CANCERS COMBINED

|                      | Calendar period | Patients submitted | Ineligible (%) ¶ |         |       | Eligible patients | Excluded (%) |       | Patients included | Data quality indicators (%) †† |                         |                   |          |
|----------------------|-----------------|--------------------|------------------|---------|-------|-------------------|--------------|-------|-------------------|--------------------------------|-------------------------|-------------------|----------|
|                      |                 |                    | Incomplete dates | In situ | Other |                   | DCO          | Other |                   | MV                             | Non-specific morphology | Lost to follow-up | Censored |
| Modena               | 2000-2012       | 48,415             | 0.0              | 9.4     | 1.0   | 43,394            | 0.0          | 0.3   | 43,257            | 90.1                           | 10.3                    | 0.0               | 1.1      |
| Monza-Brianza        | 2007-2012       | 23,105             | 0.0              | 0.0     | 0.2   | 23,069            | 0.0          | 0.3   | 22,994            | 87.0                           | 14.6                    | 0.6               | 0.0      |
| Naples               | 2000-2012       | 31,831             | 0.0              | 0.0     | 0.3   | 31,737            | 0.0          | 0.6   | 31,560            | 88.2                           | 12.5                    | 1.4               | 1.6      |
| Nuoro                | 2003-2012       | 8,356              | 0.0              | 0.0     | 0.2   | 8,338             | 1.5          | 0.3   | 8,188             | 83.6                           | 17.6                    | 0.0               | 0.0      |
| Palermo              | 2003-2012       | 42,164             | 0.0              | 0.0     | 0.2   | 42,079            | 2.9          | 0.3   | 40,743            | 84.2                           | 17.0                    | 0.2               | 0.0      |
| Parma                | 2000-2014       | 38,055             | 0.0              | 6.1     | 0.7   | 35,460            | 0.4          | 0.2   | 35,239            | 90.0                           | 11.9                    | 1.2               | 0.1      |
| Pavia                | 2003-2009       | 19,799             | 0.0              | 0.0     | 0.4   | 19,712            | 0.1          | 0.3   | 19,639            | 84.4                           | 17.3                    | 0.5               | 0.6      |
| Piacenza             | 2006-2011       | 9,710              | 0.0              | 0.0     | 0.2   | 9,693             | 0.0          | 0.4   | 9,655             | 86.9                           | 13.9                    | 0.6               | 2.4      |
| Ragusa               | 2000-2012       | 19,865             | 0.0              | 2.6     | 1.7   | 19,020            | 2.1          | 0.3   | 18,557            | 83.4                           | 20.6                    | 0.4               | 0.0      |
| Reggio Emilia        | 2000-2012       | 30,321             | 0.0              | 0.0     | 0.3   | 30,222            | 0.0          | 0.4   | 30,093            | 89.6                           | 13.8                    | 1.1               | 0.0      |
| Romagna              | 2000-2012       | 89,498             | 0.0              | 8.7     | 0.3   | 81,390            | 0.1          | 0.2   | 81,179            | 87.7                           | 12.8                    | 0.1               | 0.0      |
| Salerno              | 2000-2009       | 33,903             | 0.0              | 0.0     | 0.2   | 33,841            | 0.0          | 0.7   | 33,610            | 81.2                           | 19.9                    | 0.5               | 3.2      |
| Sassari              | 2000-2011       | 20,654             | 0.0              | 0.0     | 0.1   | 20,628            | 2.4          | 0.4   | 20,063            | 88.0                           | 15.6                    | 0.0               | 0.0      |
| Siracusa             | 2000-2012       | 16,868             | 0.0              | 0.0     | 0.3   | 16,823            | 2.5          | 0.3   | 16,359            | 84.3                           | 17.6                    | 0.0               | 1.0      |
| Sondrio              | 2000-2011       | 10,378             | 0.0              | 0.0     | 0.3   | 10,352            | 0.0          | 0.2   | 10,330            | 86.7                           | 14.7                    | 0.3               | 0.2      |
| Taranto              | 2006-2012       | 15,357             | 0.0              | 0.0     | 0.3   | 15,312            | 2.0          | 0.6   | 14,910            | 88.6                           | 12.5                    | 1.6               | 0.0      |
| Trapani              | 2002-2010       | 12,270             | 0.0              | 0.0     | 0.2   | 12,241            | 0.7          | 0.4   | 12,100            | 83.6                           | 21.3                    | 0.7               | 0.6      |
| Trento               | 2000-2010       | 21,654             | 0.0              | 0.0     | 0.2   | 21,600            | 0.8          | 0.4   | 21,356            | 90.2                           | 12.4                    | 0.9               | 0.0      |
| Turin                | 2000-2012       | 64,752             | 0.0              | 6.1     | 0.9   | 60,221            | 1.4          | 0.2   | 59,247            | 89.9                           | 11.4                    | 1.8               | 0.0      |
| Tuscany              | 2000-2009       | 68,620             | 0.0              | 5.4     | 6.5   | 60,418            | 0.8          | 0.4   | 59,734            | 86.0                           | 15.6                    | 0.0               | 2.2      |
| Umbria               | 2000-2013       | 62,286             | 0.0              | 0.0     | 0.2   | 62,154            | 0.2          | 0.2   | 61,904            | 91.6                           | 10.0                    | 0.2               | 0.2      |
| Varese               | 2000-2012       | 52,594             | 0.0              | 0.0     | 0.7   | 52,237            | 0.2          | 0.2   | 52,026            | 90.1                           | 10.3                    | 0.6               | 0.2      |
| Veneto               | 2000-2009       | 111,189            | 0.0              | 0.0     | 0.3   | 110,902           | 0.5          | 0.3   | 110,047           | 87.6                           | 14.4                    | 0.6               | 1.7      |
| Viterbo              | 2006-2010       | 7,926              | 0.0              | 0.0     | 0.2   | 7,911             | 2.0          | 0.4   | 7,723             | 86.6                           | 14.0                    | 0.1               | 29.0     |
| Piedmont Childhood   | 2000-2011       | 718                | 0.0              | 0.6     | 0.0   | 714               | 0.0          | 0.0   | 714               | 97.6                           | 2.4                     | 0.0               | 0.0      |
| Latvia *             | 2000-2014       | 97,852             | 0.0              | 0.1     | 26.8  | 71,511            | 0.0          | 0.6   | 71,082            | 99.8                           | 1.1                     | 0.0               | 0.0      |
| Lithuania *          | 2000-2012       | 154,857            | 0.0              | 4.1     | 1.1   | 146,896           | 4.9          | 0.2   | 139,475           | 87.6                           | 1.5                     | 0.0               | 0.3      |
| Malta *              | 2000-2013       | 17,625             | 0.0              | 6.9     | 1.8   | 16,091            | 3.1          | 0.4   | 15,518            | 92.4                           | 8.9                     | 0.0               | 0.0      |
| Netherlands *        | 2000-2014       | 1,047,456          | 0.0              | 3.8     | 1.2   | 994,826           | 0.2          | 0.6   | 987,029           | 96.2                           | 4.0                     | 0.5               | 0.0      |
| Norway *             | 2000-2014       | 488,733            | 0.0              | 10.3    | 32.5  | 279,696           | 0.5          | 0.1   | 277,991           | 99.8                           | 0.4                     | 0.2               | 0.0      |
| Poland *             | 2000-2014       | 1,389,978          | 0.0              | 0.1     | 0.3   | 1,383,780         | 2.5          | 0.3   | 1,344,837         | 91.4                           | 1.3                     | 0.0               | 0.0      |
| Greater Poland       | 2000-2014       | 126,836            | 0.0              | 0.0     | 0.4   | 126,303           | 4.6          | 0.3   | 120,099           | 94.5                           | 1.3                     | 0.0               | 0.0      |
| Holy Cross           | 2000-2014       | 50,346             | 0.0              | 0.0     | 0.4   | 50,143            | 2.0          | 0.3   | 48,965            | 94.6                           | 1.6                     | 0.0               | 0.0      |
| Kuiavia-Pomerania    | 2000-2014       | 78,140             | 0.0              | 0.0     | 0.3   | 77,876            | 0.9          | 0.3   | 76,963            | 97.3                           | 1.3                     | 0.0               | 0.0      |
| Lesser Poland        | 2000-2014       | 117,449            | 0.0              | 0.0     | 0.4   | 116,962           | 3.5          | 0.2   | 112,639           | 93.1                           | 2.9                     | 0.0               | 0.0      |
| Łódź                 | 2000-2014       | 94,240             | 0.0              | 0.0     | 0.2   | 94,014            | 0.7          | 1.3   | 92,164            | 85.2                           | 1.1                     | 0.0               | 0.0      |
| Lower Silesia        | 2000-2014       | 117,073            | 0.0              | 1.4     | 0.0   | 115,374           | 0.5          | 0.2   | 114,565           | 82.9                           | 2.7                     | 0.2               | 0.0      |
| Lublin               | 2000-2014       | 78,404             | 0.0              | 0.0     | 0.3   | 78,142            | 5.8          | 0.2   | 73,444            | 87.5                           | 1.0                     | 0.0               | 0.0      |
| Lubush               | 2000-2014       | 34,325             | 0.0              | 0.1     | 0.3   | 34,216            | 2.0          | 0.2   | 33,469            | 93.5                           | 0.9                     | 0.0               | 0.0      |
| Mazovia              | 2000-2014       | 170,744            | 0.0              | 0.0     | 0.3   | 170,253           | 0.0          | 0.1   | 170,070           | 91.3                           | 0.6                     | 0.0               | 0.0      |
| Opole                | 2000-2014       | 35,859             | 0.0              | 0.0     | 0.5   | 35,683            | 0.1          | 0.3   | 35,555            | 96.9                           | 0.6                     | 0.0               | 0.0      |
| Podlaha              | 2000-2014       | 40,204             | 0.0              | 0.0     | 0.3   | 40,074            | 6.1          | 0.4   | 37,464            | 86.9                           | 1.7                     | 0.0               | 0.0      |
| Pomerania            | 2000-2014       | 91,246             | 0.0              | 0.0     | 0.4   | 90,863            | 7.7          | 0.3   | 83,629            | 96.8                           | 0.5                     | 0.0               | 0.0      |
| Silesia              | 2000-2014       | 174,659            | 0.0              | 0.0     | 0.5   | 173,782           | 1.0          | 0.2   | 171,619           | 90.6                           | 0.9                     | 0.0               | 0.0      |
| Subcarpathia         | 2000-2014       | 71,626             | 0.0              | 0.0     | 0.3   | 71,445            | 2.8          | 0.9   | 68,809            | 96.4                           | 1.5                     | 0.0               | 0.0      |
| Varmia-Mazuria       | 2000-2014       | 48,491             | 0.0              | 0.0     | 0.2   | 48,366            | 0.4          | 0.2   | 48,037            | 95.4                           | 1.6                     | 0.0               | 0.2      |
| West Pomerania       | 2000-2014       | 60,336             | 0.0              | 0.0     | 0.1   | 60,284            | 4.5          | 0.3   | 57,346            | 86.0                           | 0.9                     | 0.0               | 0.0      |
| Portugal *           | 2000-2014       | 408,523            | 0.7              | 2.7     | 1.5   | 388,199           | 0.1          | 0.2   | 386,853           | 96.7                           | 2.7                     | 1.7               | 0.0      |
| Azores               | 2000-2014       | 10,193             | 0.0              | 0.0     | 0.4   | 10,155            | 3.9          | 0.4   | 9,717             | 92.2                           | 8.4                     | 0.6               | 0.9      |
| Portugal Central     | 2003-2010       | 44,723             | 0.4              | 0.0     | 0.0   | 44,526            | 0.0          | 0.1   | 44,488            | 97.5                           | 4.1                     | 0.6               | 0.0      |
| Portugal North       | 2000-2010       | 103,329            | 2.5              | 0.0     | 1.0   | 99,736            | 0.0          | 0.1   | 99,591            | 97.9                           | 3.4                     | 0.0               | 0.0      |
| Portugal South       | 2000-2014       | 250,278            | 0.0              | 4.5     | 2.1   | 233,782           | 0.0          | 0.3   | 233,057           | 96.2                           | 1.9                     | 2.6               | 0.0      |
| Romania (Cluj)       | 2006-2012       | 17,740             | 0.0              | 3.1     | 1.7   | 16,894            | 16.6         | 0.2   | 14,060            | 90.1                           | 10.7                    | 0.0               | 0.0      |
| Russian registries ‡ | 2000-2014       | 252,171            | 0.0              | 0.5     | 0.4   | 249,928           | 0.8          | 1.0   | 245,591           | 85.4                           | 4.1                     | 2.0               | 1.3      |
| Arkhangelsk          | 2000-2014       | 47,844             | 0.0              | 1.0     | 0.3   | 47,208            | 0.9          | 1.1   | 46,280            | 85.0                           | 4.0                     | 1.1               | 0.0      |
| Karelia              | 2000-2014       | 26,813             | 0.0              | 2.5     | 0.8   | 25,934            | 2.0          | 0.6   | 25,277            | 79.4                           | 6.0                     | 0.9               | 3.1      |
| Omsk                 | 2000-2014       | 37,792             | 0.0              | 0.0     | 0.1   | 37,736            | 0.0          | 0.4   | 37,585            | 98.4                           | 5.1                     | 4.2               | 5.7      |
| Samara               | 2000-2014       | 119,094            | 0.0              | 0.0     | 0.4   | 118,621           | 0.8          | 0.6   | 116,931           | 82.9                           | 4.1                     | 1.8               | 0.0      |
| Tomsk                | 2005-2014       | 20,628             | 0.0              | 0.8     | 0.1   | 20,429            | 0.0          | 4.5   | 19,518            | 84.4                           | 0.1                     | 2.0               | 1.4      |
| Slovakia *           | 2000-2010       | 180,029            | 0.0              | 4.1     | 1.3   | 170,269           | 8.2          | 0.1   | 156,122           | 94.0                           | 6.7                     | 0.0               | 0.0      |
| Slovenia *           | 2000-2013       | 124,213            | 0.0              | 13.0    | 2.4   | 105,052           | 2.0          | 0.0   | 102,970           | 93.5                           | 0.3                     | 0.1               | 0.0      |
| Spanish registries   | 2000-2014       | 417,865            | 0.3              | 6.8     | 0.9   | 384,586           | 1.9          | 0.2   | 376,759           | 91.7                           | 2.2                     | 0.5               | 0.5      |
| Basque Country       | 2000-2013       | 139,746            | 0.0              | 8.3     | 0.4   | 127,525           | 1.3          | 0.2   | 125,628           | 90.5                           | 0.7                     | 0.4               | 0.0      |
| Canaries             | 2000-2011       | 62,696             | 0.0              | 10.7    | 1.4   | 55,103            | 1.8          | 0.0   | 54,085            | 92.6                           | 1.0                     | 0.2               | 0.0      |
| Girona               | 2000-2013       | 41,234             | 1.2              | 9.5     | 2.8   | 35,686            | 2.8          | 0.2   | 34,611            | 92.9                           | 7.8                     | 1.2               | 0.0      |
| Granada              | 2000-2012       | 32,737             | 0.0              | 0.0     | 0.8   | 32,472            | 2.6          | 0.0   | 31,636            | 87.8                           | 0.3                     | 0.4               | 0.0      |
| Mallorca             | 2000-2012       | 35,985             | 0.9              | 7.1     | 0.9   | 32,764            | 2.1          | 0.2   | 31,994            | 93.2                           | 1.0                     | 2.1               | 0.0      |
| Murcia               | 2000-2010       | 43,277             | 0.0              | 0.0     | 0.6   | 43,028            | 1.9          | 0.3   | 42,079            | 93.2                           | 7.7                     | 0.0               | 0.0      |
| Navarra              | 2000-2010       | 25,889             | 0.0              | 6.2     | 0.1   | 24,257            | 1.6          | 0.0   | 23,875            | 91.4                           | 0.9                     | 0.2               | 0.0      |
| Tarragona            | 2000-2011       | 33,178             | 0.8              | 5.7     | 1.2   | 30,628            | 2.7          | 0.2   | 29,734            | 93.2                           | 0.8                     | 0.0               | 0.0      |
| Spain Childhood      | 2000-2014       | 2,354              | 0.0              | 0.0     | 0.0   | 2,354             | 0.0          | 0.2   | 2,349             | 95.1                           | 0.3                     | 0.0               | 73.4     |
| Valencia Childhood   | 2000-2012       | 769                | 0.0              | 0.0     | 0.0   | 769               | 0.0          | 0.1   | 768               | 97.5                           | 3.0                     | 0.0               | 0.0      |
| Sweden *             | 2000-2014       | 676,693            | 0.0              | 15.4    | 3.0   | 551,717           | 1.1          | 0.2   | 544,531           | 98.6                           | 2.2                     | 0.2               | 0.0      |
| Swiss registries     | 2000-2014       | 241,610            | 0.0              | 7.9     | 2.5   | 216,439           | 1.2          | 0.5   | 212,695           | 95.9                           | 2.4                     | 4.6               | 3.9      |
| Basel                | 2000-2011       | 13,160             | 0.0              | 0.0     | 0.8   | 13,059            | 0.4          | 6.0   | 12,224            | 100.0                          | 0.1                     | 0.7               | 11.2     |
| Fribourg             | 2006-2014       | 10,790             | 0.0              | 11.8    | 1.9   | 9,306             | 0.0          | 1.7   | 9,144             | 97.1                           | 3.1                     | 2.4               | 0.0      |
| Geneva               | 2000-2013       | 30,053             | 0.0              | 14.5    | 1.7   | 25,185            | 1.2          | 0.2   | 24,836            | 94.3                           | 6.0                     | 5.9               | 0.0      |
| Graubünden-Glarus    | 2000-2014       | 15,071             | 0.0              | 6.1     | 0.7   | 14,034            | 0.2          | 0.0   | 14,002            | 94.2                           | 0.2                     | 39.4              | 0.0      |
| Neuchâtel            | 2000-2014       | 15,601             | 0.0              | 6.3     | 25.0  | 10,719            | 1.0          | 0.0   | 10,608            | 93.4                           | 1.3                     | 2.8               | 3.0      |
| St Gallen-Appenzell  | 2000-2014       | 31,311             | 0.0              | 6.9     | 0.6   | 28,961            | 0.3          | 0.0   | 28,881            | 95.5                           | 0.1                     | 2.7               | 0.0      |
| Ticino               | 2000-2014       | 24,006             | 0.0              | 5.5     | 0.1   | 22,674            | 1.7          | 0.1   | 22,251            | 97.4                           | 2.9                     | 1.9               | 0.0      |
| Valais               | 2000-2014       | 21,024             | 0.0              | 10.6    | 1.0   | 18,582            | 0.5          | 0.0   | 18,482            | 93.0                           | 0.2                     | 1.4               | 0.0      |

Web-table 2: Data quality indicators, patients diagnosed during 2000-2014, by continent, country and registry: ALL CANCERS COMBINED

|                              | Calendar period | Patients submitted | Ineligible (%) ¶ |            |            | Eligible patients | Excluded (%) |            | Patients included | Data quality indicators (%) †† |                         |                   |            |
|------------------------------|-----------------|--------------------|------------------|------------|------------|-------------------|--------------|------------|-------------------|--------------------------------|-------------------------|-------------------|------------|
|                              |                 |                    | Incomplete dates | In situ    | Other      |                   | DCO          | Other      |                   | MV                             | Non-specific morphology | Lost to follow-up | Censored   |
| Zürich                       | 2000-2013       | 78,875             | 0.0              | 7.4        | 1.0        | 72,287            | 2.1          | 0.2        | 70,645            | 96.8                           | 3.4                     | 1.1               | 9.4        |
| Switzerland (Childhood) †    | 2000-2014       | 1,719              | 0.0              | 0.0        | 5.1        | 1,632             | 0.0          | 0.6        | 1,622             | 95.0                           | 0.1                     | 1.4               | 1.0        |
| United Kingdom *             | 2000-2014       | 4,389,211          | 0.1              | 13.0       | 1.4        | 3,753,685         | 1.8          | 0.3        | 3,673,362         | 94.9                           | 4.5                     | 1.9               | 0.0        |
| England                      | 2000-2014       | 3,617,431          | 0.1              | 13.0       | 1.0        | 3,106,653         | 1.9          | 0.4        | 3,035,060         | 96.1                           | 4.6                     | 2.3               | 0.0        |
| Northern Ireland             | 2000-2014       | 118,041            | 0.1              | 17.3       | 2.3        | 94,712            | 0.8          | 0.2        | 93,719            | 87.6                           | 14.4                    | 0.0               | 0.0        |
| Scotland                     | 2000-2014       | 413,899            | 0.0              | 12.8       | 3.3        | 347,140           | 0.5          | 0.0        | 345,391           | 85.9                           | 0.8                     | 0.1               | 0.0        |
| Wales                        | 2000-2014       | 239,840            | 0.0              | 10.3       | 4.2        | 205,180           | 2.6          | 0.3        | 199,192           | 96.6                           | 4.6                     | 0.0               | 0.0        |
| <b>OCEANIA</b>               |                 | <b>1,691,153</b>   | <b>0.3</b>       | <b>9.7</b> | <b>0.7</b> | <b>1,510,866</b>  | <b>1.6</b>   | <b>0.2</b> | <b>1,483,573</b>  | <b>96.5</b>                    | <b>3.6</b>              | <b>0.0</b>        | <b>0.0</b> |
| Australia *                  | 2000-2014       | 1,443,620          | 0.3              | 11.3       | 0.8        | 1,263,961         | 1.4          | 0.2        | 1,244,350         | 97.0                           | 3.0                     | 0.0               | 0.0        |
| Australian Capital Territory | 2000-2013       | 18,457             | 0.0              | 12.3       | 1.9        | 15,837            | 1.0          | 0.4        | 15,606            | 99.0                           | 1.2                     | 0.0               | 0.1        |
| New South Wales              | 2000-2012       | 375,881            | 0.2              | 0.0        | 0.6        | 372,743           | 1.3          | 0.2        | 367,212           | 98.6                           | 1.9                     | 0.0               | 0.0        |
| Northern Territory           | 2000-2013       | 6,284              | 0.0              | 0.0        | 0.3        | 6,264             | 0.2          | 0.2        | 6,236             | 94.5                           | 0.7                     | 0.0               | 0.0        |
| Queensland                   | 2000-2014       | 378,047            | 1.1              | 21.5       | 1.5        | 286,932           | 1.2          | 0.2        | 283,124           | 98.3                           | 2.3                     | 0.0               | 0.0        |
| South Australia              | 2000-2013       | 99,493             | 0.0              | 0.0        | 0.4        | 99,040            | 0.1          | 0.3        | 98,633            | 93.8                           | 1.2                     | 0.0               | 0.0        |
| Tasmania                     | 2000-2013       | 36,116             | 0.0              | 7.7        | 1.3        | 32,892            | 1.2          | 0.3        | 32,378            | 95.2                           | 5.7                     | 0.0               | 0.0        |
| Victoria                     | 2000-2014       | 391,807            | 0.0              | 16.2       | 0.2        | 327,488           | 2.5          | 0.1        | 319,030           | 94.8                           | 5.6                     | 0.0               | 0.0        |
| Western Australia            | 2000-2014       | 137,535            | 0.0              | 9.9        | 0.8        | 122,765           | 0.4          | 0.2        | 122,131           | 97.4                           | 2.9                     | 0.0               | 0.0        |
| New Zealand *                | 2000-2014       | 247,533            | 0.0              | 0.0        | 0.3        | 246,905           | 2.9          | 0.2        | 239,223           | 94.3                           | 6.3                     | 0.0               | 0.0        |
| <b>Total</b>                 |                 | <b>42,222,177</b>  | <b>0.5</b>       | <b>6.4</b> | <b>1.2</b> | <b>38,777,265</b> | <b>2.9</b>   | <b>0.3</b> | <b>37,513,025</b> | <b>94.6</b>                    | <b>4.9</b>              | <b>1.0</b>        | <b>1.1</b> |

Web-table 2.1: Data quality indicators, patients diagnosed during 2000-2014, by continent, country and registry: OESOPHAGUS

Back

|                                    | Calendar period | Patients submitted | Ineligible (%) ¶ |            |            | Excluded (%) ¶¶   |             |            | Patients included | Data quality indicators (%) †† |                         |                   |             |
|------------------------------------|-----------------|--------------------|------------------|------------|------------|-------------------|-------------|------------|-------------------|--------------------------------|-------------------------|-------------------|-------------|
|                                    |                 |                    | Incomplete dates | In situ    | Other      | Eligible patients | DCO         | Other      |                   | MV                             | Non-specific morphology | Lost to follow-up | Censored    |
| <b>AFRICA</b>                      |                 | <b>3,116</b>       | <b>1.5</b>       | <b>0.0</b> | <b>0.0</b> | <b>3,069</b>      | <b>0.1</b>  | <b>0.3</b> | <b>3,057</b>      | <b>50.0</b>                    | <b>50.3</b>             | <b>20.0</b>       | <b>36.7</b> |
| Algerian registries                | 2000-2014       | 161                | 28.6             | 0.0        | 0.6        | 114               | 3.5         | 5.3        | 104               | 97.1                           | 3.8                     | 0.0               | 10.6        |
| Annaba                             | 2000-2013       | 18                 | 0.0              | 0.0        | 5.6        | 17                | 0.0         | 0.0        | 17                | 82.4                           | 11.8                    | 0.0               | 58.8        |
| Sétif                              | 2000-2014       | 75                 | 61.3             | 0.0        | 0.0        | 29                | 0.0         | 20.7       | 23                | 100.0                          | 0.0                     | 0.0               | 0.0         |
| Tlemcen                            | 2006-2014       | 68                 | 0.0              | 0.0        | 0.0        | 68                | 5.9         | 0.0        | 64                | 100.0                          | 3.1                     | 0.0               | 1.6         |
| Mali (Bamako)                      | -               | -                  | -                | -          | -          | -                 | -           | -          | -                 | -                              | -                       | -                 | -           |
| Mauritius *                        | 2010-2012       | 61                 | 0.0              | 0.0        | 0.0        | 61                | 0.0         | 3.3        | 59                | 100.0                          | 11.9                    | 0.0               | 0.0         |
| Morocco (Casablanca)               | -               | -                  | -                | -          | -          | -                 | -           | -          | -                 | -                              | -                       | -                 | -           |
| Nigeria (Ibadan)                   | -               | -                  | -                | -          | -          | -                 | -           | -          | -                 | -                              | -                       | -                 | -           |
| South Africa (Eastern Cape)        | 2000-2014       | 2,894              | 0.0              | 0.0        | 0.0        | 2,894             | 0.0         | 0.0        | 2,894             | 47.2                           | 52.8                    | 21.1              | 38.4        |
| <b>AMERICA (Central and South)</b> |                 | <b>17,049</b>      | <b>9.7</b>       | <b>0.6</b> | <b>0.2</b> | <b>15,272</b>     | <b>11.2</b> | <b>0.2</b> | <b>13,528</b>     | <b>89.9</b>                    | <b>10.7</b>             | <b>3.4</b>        | <b>1.0</b>  |
| Argentinian registries             | 2002-2013       | 1,406              | 0.0              | 0.5        | 0.1        | 1,398             | 17.4        | 0.2        | 1,152             | 96.4                           | 4.6                     | 0.0               | 0.0         |
| Chubut                             | -               | -                  | -                | -          | -          | -                 | -           | -          | -                 | -                              | -                       | -                 | -           |
| Córdoba                            | 2004-2012       | 520                | 0.0              | 0.4        | 0.2        | 517               | 16.8        | 0.2        | 429               | 96.7                           | 5.1                     | 0.0               | 0.0         |
| Mendoza                            | 2003-2013       | 886                | 0.0              | 0.6        | 0.0        | 881               | 17.7        | 0.2        | 723               | 96.1                           | 4.3                     | 0.0               | 0.0         |
| Tierra del Fuego                   | -               | -                  | -                | -          | -          | -                 | -           | -          | -                 | -                              | -                       | -                 | -           |
| Argentina (Childhood) †            | -               | -                  | -                | -          | -          | -                 | -           | -          | -                 | -                              | -                       | -                 | -           |
| Brazilian registries               | 2000-2014       | 9,031              | 16.8             | 0.7        | 0.1        | 7,443             | 10.2        | 0.1        | 6,678             | 88.4                           | 12.0                    | 6.8               | 0.0         |
| Aracaju                            | 2000-2012       | 145                | 4.8              | 0.0        | 0.7        | 137               | 8.0         | 0.0        | 126               | 96.8                           | 3.2                     | 0.0               | 0.0         |
| Cuiabá                             | -               | -                  | -                | -          | -          | -                 | -           | -          | -                 | -                              | -                       | -                 | -           |
| Curitiba                           | 2000-2012       | 1,202              | 0.0              | 0.0        | 0.3        | 1,198             | 18.8        | 0.2        | 971               | 93.1                           | 7.7                     | 0.0               | 0.0         |
| Goiânia                            | 2000-2012       | 546                | 6.6              | 0.2        | 0.4        | 507               | 10.5        | 1.0        | 449               | 99.8                           | 2.7                     | 0.0               | 0.2         |
| Jaú                                | 2000-2014       | 136                | 0.7              | 0.0        | 0.0        | 135               | 0.7         | 0.0        | 134               | 99.3                           | 1.5                     | 0.0               | 0.0         |
| São Paulo                          | 2000-2012       | 7,002              | 21.1             | 0.9        | 0.0        | 5,466             | 8.5         | 0.0        | 4,998             | 86.0                           | 14.2                    | 9.1               | 0.0         |
| Chilean registries                 | 2000-2012       | 1,016              | 0.0              | 0.0        | 0.4        | 1,012             | 9.3         | 0.0        | 918               | 84.5                           | 13.8                    | 0.0               | 1.6         |
| Antofagasta                        | 2003-2010       | 135                | 0.0              | 0.0        | 0.7        | 134               | 20.1        | 0.0        | 107               | 83.2                           | 17.8                    | 0.0               | 1.9         |
| Biobio                             | 2003-2012       | 296                | 0.0              | 0.0        | 1.0        | 293               | 6.1         | 0.0        | 275               | 76.0                           | 25.1                    | 0.0               | 1.1         |
| Concepción                         | 2006-2010       | 260                | 0.0              | 0.0        | 0.0        | 260               | 11.9        | 0.0        | 229               | 83.8                           | 16.6                    | 0.0               | 0.9         |
| Los Rios                           | 2000-2012       | 325                | 0.0              | 0.0        | 0.0        | 325               | 5.5         | 0.0        | 307               | 93.2                           | 0.3                     | 0.0               | 2.6         |
| Colombian registries               | 2000-2014       | 744                | 5.8              | 0.1        | 0.4        | 697               | 7.3         | 0.6        | 642               | 87.1                           | 13.6                    | 0.0               | 15.6        |
| Bucaramanga                        | -               | -                  | -                | -          | -          | -                 | -           | -          | -                 | -                              | -                       | -                 | -           |
| Cali                               | 2000-2014       | 539                | 1.3              | 0.0        | 0.4        | 530               | 7.0         | 0.4        | 491               | 85.3                           | 14.9                    | 0.0               | 18.3        |
| Manizales                          | 2003-2012       | 111                | 27.0             | 0.0        | 0.9        | 80                | 2.5         | 2.5        | 76                | 88.2                           | 13.2                    | 0.0               | 13.2        |
| Pasto                              | 2000-2012       | 94                 | 6.4              | 1.1        | 0.0        | 87                | 13.8        | 0.0        | 75                | 97.3                           | 5.3                     | 0.0               | 0.0         |
| Costa Rica *                       | 2002-2014       | 629                | 0.0              | 0.0        | 0.3        | 627               | 15.5        | 0.3        | 528               | 86.2                           | 18.8                    | 0.0               | 0.0         |
| Cuba *                             | -               | -                  | -                | -          | -          | -                 | -           | -          | -                 | -                              | -                       | -                 | -           |
| Ecuadorian registries              | 2000-2013       | 622                | 7.7              | 1.0        | 0.3        | 566               | 13.1        | 1.1        | 486               | 88.1                           | 13.6                    | 0.4               | 0.8         |
| Cuenca                             | 2003-2012       | 43                 | 27.9             | 0.0        | 2.3        | 30                | 16.7        | 0.0        | 25                | 88.0                           | 12.0                    | 0.0               | 12.0        |
| Guayaquil                          | 2005-2013       | 151                | 0.0              | 0.7        | 0.0        | 150               | 7.3         | 4.0        | 133               | 88.7                           | 14.3                    | 0.0               | 0.0         |
| Loja                               | 2000-2013       | 25                 | 0.0              | 0.0        | 0.0        | 25                | 4.0         | 0.0        | 24                | 87.5                           | 16.7                    | 8.3               | 0.0         |
| Manabí                             | 2000-2013       | 142                | 7.0              | 0.7        | 0.0        | 131               | 16.8        | 0.0        | 109               | 77.1                           | 23.9                    | 0.0               | 0.0         |
| Quito                              | 2000-2013       | 261                | 10.0             | 1.5        | 0.4        | 230               | 15.2        | 0.0        | 195               | 93.8                           | 7.2                     | 0.0               | 0.5         |
| Guadeloupe *                       | 2008-2013       | 119                | 0.0              | 0.0        | 0.0        | 119               | 0.0         | 0.0        | 119               | 100.0                          | 0.0                     | 0.0               | 10.1        |
| Martinique *                       | 2000-2012       | 214                | 0.0              | 0.0        | 0.0        | 214               | 0.0         | 0.5        | 213               | 96.7                           | 0.5                     | 1.4               | 0.0         |
| Mexico (Childhood) †               | -               | -                  | -                | -          | -          | -                 | -           | -          | -                 | -                              | -                       | -                 | -           |
| Peru (Lima)                        | -               | -                  | -                | -          | -          | -                 | -           | -          | -                 | -                              | -                       | -                 | -           |
| Puerto Rico *                      | 2000-2011       | 1,995              | 2.3              | 0.9        | 0.2        | 1,929             | 9.5         | 0.2        | 1,743             | 97.6                           | 3.8                     | 0.0               | 0.0         |
| Uruguay *                          | 2008-2012       | 1,273              | 0.0              | 0.2        | 0.2        | 1,267             | 17.2        | 0.0        | 1,049             | 86.7                           | 14.1                    | 0.0               | 0.0         |
| <b>AMERICA (North)</b>             |                 | <b>205,390</b>     | <b>0.4</b>       | <b>1.9</b> | <b>0.2</b> | <b>200,401</b>    | <b>2.1</b>  | <b>0.5</b> | <b>195,255</b>    | <b>98.3</b>                    | <b>2.4</b>              | <b>0.4</b>        | <b>0.0</b>  |
| Canadian registries                | 2000-2014       | 19,479             | 0.1              | 1.1        | 0.1        | 19,217            | 1.3         | 0.9        | 18,788            | 96.3                           | 3.9                     | 0.0               | 0.0         |
| Alberta                            | 2000-2014       | 2,217              | 0.1              | 1.5        | 0.1        | 2,178             | 0.2         | 0.3        | 2,167             | 98.9                           | 1.3                     | 0.0               | 0.0         |
| British Columbia                   | 2000-2014       | 3,698              | 0.2              | 2.1        | 0.3        | 3,603             | 1.0         | 0.6        | 3,545             | 98.4                           | 1.8                     | 0.0               | 0.0         |
| Manitoba                           | 2000-2014       | 834                | 0.0              | 4.0        | 0.4        | 798               | 1.6         | 0.8        | 779               | 98.1                           | 2.7                     | 0.0               | 0.0         |
| New Brunswick                      | 2000-2014       | 639                | 0.0              | 2.0        | 0.2        | 625               | 0.5         | 0.3        | 620               | 95.6                           | 0.0                     | 0.0               | 0.0         |
| Newfoundland & Labrador            | 2000-2014       | 371                | 0.3              | 2.2        | 0.3        | 361               | 2.8         | 0.0        | 351               | 97.7                           | 2.6                     | 0.0               | 0.0         |
| Nova Scotia                        | 2000-2014       | 993                | 0.7              | 2.5        | 0.4        | 957               | 0.7         | 0.8        | 942               | 93.2                           | 7.4                     | 0.0               | 0.0         |
| Ontario                            | 2000-2014       | 9,861              | 0.0              | 0.0        | 0.0        | 9,861             | 1.8         | 1.3        | 9,559             | 95.0                           | 5.4                     | 0.0               | 0.0         |
| Prince Edward Island               | 2000-2014       | 143                | 0.0              | 4.2        | 0.0        | 137               | 1.5         | 0.0        | 135               | 94.8                           | 5.2                     | 0.0               | 0.0         |
| Saskatchewan                       | 2000-2014       | 723                | 0.0              | 3.2        | 0.4        | 697               | 1.0         | 0.0        | 690               | 97.2                           | 2.9                     | 0.0               | 0.0         |
| US registries                      | 2000-2014       | 185,911            | 0.4              | 1.9        | 0.2        | 181,184           | 2.2         | 0.4        | 176,467           | 98.6                           | 2.2                     | 0.4               | 0.0         |
| Alabama                            | 2000-2014       | 3,800              | 0.3              | 1.5        | 0.1        | 3,725             | 1.3         | 0.4        | 3,661             | 97.9                           | 2.7                     | 0.0               | 0.0         |
| Alaska                             | 2000-2013       | 433                | 2.3              | 1.8        | 0.0        | 415               | 0.2         | 0.7        | 411               | 99.3                           | 1.7                     | 0.0               | 0.0         |
| Arkansas                           | 2000-2011       | 1,564              | 0.2              | 1.9        | 0.4        | 1,525             | 2.6         | 0.8        | 1,474             | 99.5                           | 1.2                     | 0.0               | 0.0         |
| California                         | 2000-2011       | 16,157             | 0.9              | 1.5        | 0.3        | 15,732            | 0.8         | 0.7        | 15,495            | 98.7                           | 1.9                     | 0.0               | 0.0         |
| Greater Bay Area                   | 2000-2014       | 3,984              | 0.5              | 1.8        | 0.3        | 3,878             | 1.2         | 0.6        | 3,810             | 99.3                           | 1.1                     | 2.2               | 0.0         |
| Greater California                 | 2000-2014       | 11,958             | 0.9              | 1.3        | 0.2        | 11,671            | 0.9         | 0.7        | 11,485            | 98.5                           | 2.2                     | 1.8               | 0.0         |
| Los Angeles                        | 2000-2014       | 4,531              | 0.9              | 1.5        | 0.5        | 4,396             | 0.7         | 0.5        | 4,344             | 98.6                           | 1.9                     | 4.0               | 0.0         |
| Colorado                           | 2000-2013       | 2,769              | 0.1              | 1.8        | 0.1        | 2,712             | 2.9         | 0.2        | 2,627             | 97.6                           | 2.7                     | 0.0               | 0.0         |
| Connecticut                        | 2000-2014       | 3,265              | 0.2              | 2.4        | 0.1        | 3,177             | 0.8         | 0.3        | 3,143             | 99.3                           | 1.2                     | 1.0               | 0.0         |
| Delaware                           | 2000-2014       | 810                | 0.4              | 1.5        | 0.2        | 793               | 2.5         | 0.8        | 767               | 99.1                           | 1.3                     | 0.0               | 0.0         |
| Florida                            | 2000-2013       | 16,019             | 0.1              | 2.9        | 0.2        | 15,511            | 3.9         | 0.4        | 14,842            | 99.1                           | 3.2                     | 0.0               | 0.0         |
| Georgia                            | 2000-2014       | 6,284              | 0.0              | 1.4        | 0.2        | 6,182             | 1.6         | 0.6        | 6,046             | 98.8                           | 2.0                     | 0.0               | 0.0         |
| Atlanta                            | 2000-2014       | 1,631              | 0.0              | 1.3        | 0.2        | 1,605             | 1.4         | 0.4        | 1,576             | 99.2                           | 1.4                     | 0.0               | 0.0         |
| Hawaii                             | 2000-2014       | 807                | 0.2              | 0.9        | 0.1        | 797               | 1.6         | 0.1        | 783               | 98.6                           | 1.8                     | 0.5               | 0.0         |
| Idaho                              | 2000-2014       | 1,088              | 0.4              | 1.4        | 0.4        | 1,065             | 3.3         | 0.4        | 1,026             | 98.8                           | 1.4                     | 0.0               | 0.0         |
| Indiana                            | 2000-2014       | 5,597              | 0.4              | 1.6        | 0.2        | 5,477             | 2.0         | 0.5        | 5,336             | 99.2                           | 1.2                     | 0.0               | 0.0         |
| Iowa                               | 2000-2014       | 2,849              | 0.4              | 0.9        | 0.3        | 2,804             | 1.6         | 0.5        | 2,747             | 98.9                           | 1.6                     | 0.6               | 0.0         |
| Kentucky                           | 2000-2014       | 3,594              | 0.0              | 2.0        | 0.3        | 3,511             | 0.8         | 0.9        | 3,452             | 98.0                           | 2.4                     | 0.3               | 0.0         |
| Louisiana                          | 2000-2014       | 3,530              | 0.2              | 1.3        | 0.2        | 3,467             | 1.4         | 0.3        | 3,409             | 99.0                           | 1.3                     | 0.5               | 0.0         |
| Maine                              | 2000-2013       | 1,529              | 0.0              | 1.0        | 0.1        | 1,512             | 2.3         | 0.6        | 1,468             | 99.1                           | 1.0                     | 0.0               | 0.0         |
| Massachusetts                      | 2000-2009       | 4,628              | 0.0              | 1.7        | 0.3        | 4,533             | 1.4         | 0.6        | 4,444             | 98.2                           | 1.9                     | 0.0               | 0.0         |
| Michigan                           | 2000-2013       | 8,558              | 0.2              | 1.2        | 0.2        | 8,424             | 1.4         | 0.4        | 8,270             | 97.1                           | 3.6                     | 0.0               | 0.0         |

Web-table 2.1: Data quality indicators, patients diagnosed during 2000-2014, by continent, country and registry: OESOPHAGUS

|                     | Calendar period | Patients submitted | Ineligible (%) ¶ |            |            | Excluded (%) ¶¶   |            |            | Patients included | Data quality indicators (%) †† |                         |                   |            |
|---------------------|-----------------|--------------------|------------------|------------|------------|-------------------|------------|------------|-------------------|--------------------------------|-------------------------|-------------------|------------|
|                     |                 |                    | Incomplete dates | In situ    | Other      | Eligible patients | DCO        | Other      |                   | MV                             | Non-specific morphology | Lost to follow-up | Censored   |
| Detroit             | 2000-2014       | 3,419              | 0.4              | 0.8        | 0.2        | 3,371             | 1.9        | 0.3        | 3,296             | 99.5                           | 0.9                     | 0.8               | 0.0        |
| Minnesota           | 2000-2013       | 3,792              | 0.0              | 1.5        | 0.3        | 3,725             | 1.9        | 0.5        | 3,638             | 100.0                          | 0.1                     | 0.0               | 0.0        |
| Mississippi         | 2002-2014       | 2,020              | 0.3              | 1.0        | 0.3        | 1,987             | 1.8        | 0.4        | 1,944             | 98.9                           | 1.6                     | 0.0               | 0.0        |
| Missouri            | -               | -                  | -                | -          | -          | -                 | -          | -          | -                 | -                              | -                       | -                 | -          |
| Montana             | 2000-2014       | 855                | 0.2              | 2.0        | 0.4        | 833               | 3.4        | 0.8        | 798               | 99.2                           | 0.8                     | 0.0               | 0.0        |
| Nebraska            | 2000-2014       | 1,441              | 0.1              | 1.5        | 0.3        | 1,414             | 1.2        | 0.6        | 1,389             | 98.2                           | 2.2                     | 0.0               | 0.0        |
| New Hampshire       | 2000-2014       | 1,545              | 0.1              | 2.5        | 0.2        | 1,503             | 2.0        | 0.3        | 1,468             | 98.8                           | 1.6                     | 0.0               | 0.0        |
| New Jersey          | 2000-2014       | 7,129              | 0.5              | 2.6        | 0.3        | 6,889             | 1.8        | 0.1        | 6,758             | 99.0                           | 1.5                     | 8.9               | 0.0        |
| New Mexico          | 2000-2014       | 1,247              | 0.0              | 1.7        | 0.1        | 1,225             | 3.1        | 0.2        | 1,184             | 97.7                           | 3.6                     | 1.5               | 0.3        |
| New York            | 2000-2014       | 16,067             | 1.3              | 2.6        | 0.2        | 15,394            | 1.2        | 0.2        | 15,183            | 99.1                           | 1.3                     | 0.0               | 0.0        |
| New York City       | 2000-2014       | 5,206              | 2.2              | 2.0        | 0.2        | 4,974             | 1.4        | 0.1        | 4,900             | 99.3                           | 1.0                     | 0.0               | 0.0        |
| North Carolina      | 2000-2014       | 6,921              | 0.0              | 2.1        | 0.2        | 6,766             | 2.1        | 0.4        | 6,600             | 99.0                           | 1.8                     | 0.0               | 0.0        |
| Ohio                | 2000-2014       | 10,718             | 0.1              | 1.9        | 0.1        | 10,500            | 3.6        | 0.6        | 10,066            | 98.4                           | 2.7                     | 0.0               | 0.0        |
| Oklahoma            | 2000-2010       | 1,965              | 0.5              | 1.0        | 0.2        | 1,932             | 4.7        | 0.9        | 1,823             | 97.7                           | 3.6                     | 0.0               | 0.0        |
| Oregon              | 2000-2013       | 3,183              | 0.0              | 2.0        | 0.2        | 3,111             | 2.3        | 0.5        | 3,025             | 96.8                           | 4.2                     | 0.0               | 0.0        |
| Pennsylvania        | 2000-2014       | 12,694             | 0.4              | 2.5        | 0.2        | 12,293            | 1.8        | 0.3        | 12,029            | 99.1                           | 1.3                     | 0.0               | 0.0        |
| Rhode Island        | 2000-2014       | 1,084              | 0.1              | 2.2        | 0.1        | 1,058             | 1.5        | 0.6        | 1,036             | 98.0                           | 2.5                     | 0.0               | 0.1        |
| South Carolina      | 2000-2014       | 3,902              | 0.0              | 1.5        | 0.1        | 3,839             | 2.2        | 0.5        | 3,734             | 96.3                           | 4.2                     | 0.0               | 0.0        |
| Tennessee           | 2000-2011       | 3,574              | 0.2              | 1.3        | 0.1        | 3,516             | 4.2        | 0.9        | 3,337             | 99.2                           | 1.3                     | 0.0               | 0.0        |
| Texas               | 2000-2013       | 12,684             | 0.8              | 1.7        | 0.3        | 12,328            | 3.6        | 0.4        | 11,840            | 97.6                           | 4.1                     | 0.0               | 0.0        |
| Utah                | 2000-2014       | 1,023              | 0.0              | 2.5        | 0.7        | 990               | 0.6        | 0.6        | 978               | 98.5                           | 2.0                     | 0.8               | 0.1        |
| Vermont             | 2000-2013       | 581                | 0.0              | 1.0        | 0.2        | 574               | 2.1        | 0.3        | 560               | 98.9                           | 1.3                     | 0.0               | 0.0        |
| Washington          | 2000-2008       | 2,912              | 0.3              | 2.6        | 0.1        | 2,823             | 1.3        | 0.5        | 2,773             | 98.1                           | 2.2                     | 0.0               | 0.0        |
| Seattle             | 2000-2014       | 3,369              | 0.3              | 1.0        | 0.2        | 3,319             | 0.7        | 0.5        | 3,278             | 98.7                           | 1.5                     | 0.7               | 0.0        |
| West Virginia       | 2000-2014       | 1,894              | 0.4              | 1.5        | 0.2        | 1,856             | 1.1        | 0.4        | 1,828             | 98.2                           | 2.1                     | 0.0               | 0.0        |
| Wisconsin           | 2000-2013       | 4,984              | 0.4              | 2.0        | 0.1        | 4,861             | 3.4        | 0.5        | 4,673             | 99.0                           | 1.4                     | 0.0               | 0.0        |
| Wyoming             | 2000-2013       | 415                | 0.0              | 1.9        | 0.5        | 405               | 0.2        | 0.5        | 402               | 99.3                           | 1.2                     | 0.0               | 0.2        |
| <b>ASIA</b>         |                 | <b>223,117</b>     | <b>0.8</b>       | <b>1.8</b> | <b>0.1</b> | <b>216,999</b>    | <b>4.8</b> | <b>0.2</b> | <b>206,254</b>    | <b>88.2</b>                    | <b>17.5</b>             | <b>0.8</b>        | <b>0.6</b> |
| Chinese registries  | 2003-2013       | 75,177             | 1.7              | 0.5        | 0.0        | 73,518            | 1.1        | 0.0        | 72,714            | 77.3                           | 37.3                    | 2.1               | 0.0        |
| Beijing             | 2003-2013       | 7,230              | 0.1              | 0.0        | 0.0        | 7,220             | 1.6        | 0.3        | 7,084             | 68.4                           | 31.7                    | 4.5               | 0.2        |
| Changle             | 2003-2013       | 749                | 4.8              | 0.0        | 0.0        | 713               | 1.1        | 0.6        | 701               | 46.8                           | 62.5                    | 0.6               | 0.0        |
| Cixian              | 2003-2013       | 7,505              | 0.0              | 3.3        | 0.0        | 7,255             | 2.6        | 0.0        | 7,066             | 86.3                           | 13.7                    | 0.0               | 0.0        |
| Dafeng              | 2003-2013       | 3,260              | 0.0              | 0.0        | 0.0        | 3,260             | 0.2        | 0.0        | 3,253             | 93.5                           | 18.6                    | 0.0               | 0.0        |
| Dalian              | 2003-2013       | 1,903              | 0.0              | 0.0        | 0.1        | 1,902             | 6.8        | 0.0        | 1,772             | 87.6                           | 15.7                    | 0.0               | 0.2        |
| Donghai             | 2003-2013       | 1,964              | 0.1              | 0.0        | 0.0        | 1,962             | 2.0        | 0.0        | 1,922             | 57.1                           | 43.2                    | 3.4               | 0.1        |
| Feicheng            | 2003-2013       | 8,227              | 0.0              | 0.4        | 0.0        | 8,190             | 0.3        | 0.0        | 8,163             | 83.4                           | 17.8                    | 3.0               | 0.0        |
| Ganyu               | 2003-2013       | 4,179              | 0.0              | 0.0        | 0.0        | 4,178             | 0.2        | 0.0        | 4,170             | 44.9                           | 59.4                    | 1.5               | 0.0        |
| Guanyun             | 2004-2013       | 2,598              | 0.0              | 0.0        | 0.0        | 2,598             | 2.0        | 0.0        | 2,547             | 65.2                           | 70.5                    | 1.2               | 0.0        |
| Haimen              | 2003-2013       | 2,116              | 0.0              | 0.0        | 0.4        | 2,107             | 2.2        | 0.0        | 2,061             | 78.7                           | 21.3                    | 0.2               | 0.0        |
| Haining             | 2003-2013       | 840                | 0.0              | 0.0        | 0.0        | 840               | 0.8        | 0.2        | 831               | 88.1                           | 59.8                    | 0.8               | 0.0        |
| Jianhu              | 2003-2013       | 6,669              | 0.0              | 0.0        | 0.0        | 6,669             | 0.0        | 0.0        | 6,669             | 81.0                           | 75.6                    | 5.6               | 0.0        |
| Jiashan             | 2003-2013       | 674                | 0.0              | 0.0        | 0.0        | 674               | 0.3        | 0.0        | 672               | 90.9                           | 9.1                     | 0.3               | 0.0        |
| Jintan              | 2003-2013       | 2,820              | 0.0              | 0.0        | 0.1        | 2,815             | 0.8        | 0.0        | 2,793             | 43.8                           | 56.2                    | 2.3               | 0.0        |
| Lianyungang         | 2008-2013       | 1,051              | 0.0              | 0.0        | 0.0        | 1,051             | 1.7        | 0.0        | 1,033             | 78.9                           | 31.9                    | 10.5              | 0.2        |
| Linzhou             | 2003-2013       | 9,121              | 0.0              | 1.0        | 0.0        | 9,031             | 0.9        | 0.0        | 8,946             | 89.3                           | 10.7                    | 0.0               | 0.0        |
| Qidong              | 2003-2013       | 1,528              | 0.0              | 0.0        | 0.0        | 1,528             | 0.1        | 0.0        | 1,527             | 69.3                           | 30.7                    | 0.3               | 0.0        |
| Sihui               | 2003-2013       | 266                | 2.3              | 0.0        | 0.0        | 260               | 5.4        | 0.0        | 246               | 51.6                           | 65.0                    | 1.6               | 0.0        |
| Taixing             | 2003-2013       | 7,701              | 15.6             | 0.0        | 0.1        | 6,492             | 0.1        | 0.0        | 6,487             | 85.6                           | 53.9                    | 3.5               | 0.0        |
| Yangzhong           | 2003-2013       | 2,962              | 0.0              | 0.0        | 0.0        | 2,962             | 0.1        | 0.0        | 2,960             | 73.9                           | 93.3                    | 0.0               | 0.0        |
| Zhongshan           | 2003-2013       | 1,814              | 0.1              | 0.1        | 0.1        | 1,811             | 0.0        | 0.0        | 1,811             | 89.2                           | 14.0                    | 0.2               | 0.0        |
| Cyprus *            | 2004-2014       | 108                | 2.8              | 0.0        | 0.9        | 104               | 22.1       | 0.0        | 81                | 100.0                          | 0.0                     | 0.0               | 29.6       |
| Hong Kong *         | -               | -                  | -                | -          | -          | -                 | -          | -          | -                 | -                              | -                       | -                 | -          |
| Indian registries   | 2000-2014       | 274                | 0.4              | 0.0        | 0.0        | 273               | 1.5        | 0.0        | 269               | 83.6                           | 17.5                    | 2.2               | 0.0        |
| Guwahati            | -               | -                  | -                | -          | -          | -                 | -          | -          | -                 | -                              | -                       | -                 | -          |
| Karunagappally      | 2000-2014       | 274                | 0.4              | 0.0        | 0.0        | 273               | 1.5        | 0.0        | 269               | 83.6                           | 17.5                    | 2.2               | 0.0        |
| Iran (Golestan)     | 2007-2008       | 449                | 0.0              | 0.0        | 0.2        | 448               | 8.0        | 0.0        | 412               | 84.2                           | 15.8                    | 8.7               | 0.0        |
| Israel *            | 2000-2013       | 1,840              | 0.0              | 1.5        | 1.3        | 1,790             | 5.5        | 0.0        | 1,691             | 96.8                           | 3.6                     | 0.0               | 0.0        |
| Japanese registries | 2000-2014       | 76,701             | 0.5              | 4.3        | 0.1        | 72,951            | 12.7       | 0.1        | 63,631            | 93.2                           | 9.0                     | 0.0               | 1.2        |
| Aichi               | 2003-2013       | 9,301              | 0.2              | 3.4        | 0.1        | 8,953             | 8.8        | 0.0        | 8,167             | 97.3                           | 4.1                     | 0.0               | 1.3        |
| Akita               | 2010-2014       | 1,740              | 0.7              | 9.8        | 0.1        | 1,554             | 0.0        | 2.3        | 1,518             | 92.7                           | 9.0                     | 0.0               | 26.7       |
| Ehime               | 2007-2013       | 1,504              | 0.0              | 7.3        | 0.1        | 1,393             | 12.9       | 0.0        | 1,213             | 97.0                           | 3.7                     | 0.0               | 0.0        |
| Fukui               | 2003-2009       | 644                | 0.5              | 5.3        | 0.0        | 607               | 3.1        | 0.0        | 588               | 95.1                           | 6.6                     | 0.0               | 1.5        |
| Gunma               | 2003-2012       | 2,678              | 8.6              | 1.7        | 0.1        | 2,401             | 24.7       | 0.1        | 1,805             | 94.5                           | 2.5                     | 0.0               | 0.8        |
| Hiroshima           | 2004-2008       | 2,235              | 0.2              | 6.1        | 0.3        | 2,089             | 5.7        | 0.0        | 1,970             | 99.5                           | 0.6                     | 0.0               | 0.6        |
| Hyogo               | 2007-2012       | 6,316              | 0.5              | 6.4        | 0.2        | 5,867             | 20.3       | 0.0        | 4,676             | 96.2                           | 5.5                     | 0.0               | 0.8        |
| Ibaraki             | 2006-2012       | 2,883              | 0.3              | 4.6        | 0.0        | 2,741             | 15.8       | 0.0        | 2,307             | 92.9                           | 14.3                    | 0.0               | 0.6        |
| Kanagawa            | 2000-2013       | 18,493             | 0.0              | 3.3        | 0.0        | 17,872            | 19.2       | 0.1        | 14,423            | 87.8                           | 19.6                    | 0.0               | 0.0        |
| Miyagi              | 2000-2010       | 5,150              | 0.9              | 5.6        | 0.0        | 4,811             | 6.4        | 0.0        | 4,502             | 93.8                           | 6.4                     | 0.0               | 0.8        |
| Niigata             | 2000-2013       | 7,655              | 0.1              | 4.1        | 0.1        | 7,333             | 8.3        | 0.1        | 6,723             | 94.0                           | 0.4                     | 0.0               | 0.0        |
| Osaka               | 2000-2008       | 11,393             | 0.0              | 3.1        | 0.1        | 11,037            | 10.4       | 0.0        | 9,889             | 91.8                           | 10.8                    | 0.0               | 1.2        |
| Saga                | 2006-2013       | 920                | 0.3              | 7.1        | 0.0        | 852               | 9.3        | 0.0        | 773               | 94.0                           | 6.7                     | 0.0               | 0.0        |
| Tochigi             | 2006-2013       | 2,374              | 0.3              | 4.4        | 0.1        | 2,259             | 8.7        | 0.0        | 2,063             | 96.1                           | 4.6                     | 0.0               | 0.5        |
| Yamagata            | 2003-2013       | 2,707              | 0.2              | 6.7        | 0.1        | 2,518             | 4.1        | 0.0        | 2,415             | 95.9                           | 6.0                     | 0.0               | 0.3        |
| Yamanashi           | 2008-2012       | 708                | 0.4              | 5.6        | 0.1        | 664               | 9.8        | 0.0        | 599               | 95.0                           | 7.7                     | 0.0               | 0.3        |
| Jordan *            | 2000-2014       | 365                | 0.0              | 0.3        | 0.8        | 361               | 0.6        | 1.9        | 352               | 100.0                          | 0.3                     | 4.3               | 0.0        |
| Korea * ‡           | 2000-2014       | 30,775             | 0.5              | 0.0        | 0.0        | 30,628            | 0.0        | 0.0        | 30,627            | 94.4                           | 6.3                     | 0.0               | 0.0        |
| Kuwait *            | 2000-2013       | 97                 | 0.0              | 0.0        | 0.0        | 97                | 7.2        | 0.0        | 90                | 100.0                          | 0.0                     | 2.2               | 0.0        |
| Malaysia (Penang)   | 2000-2013       | 296                | 0.3              | 0.0        | 0.0        | 295               | 1.0        | 0.7        | 290               | 95.9                           | 8.3                     | 0.0               | 4.1        |
| Mongolia *          | -               | -                  | -                | -          | -          | -                 | -          | -          | -                 | -                              | -                       | -                 | -          |
| Qatar *             | 2000-2014       | 103                | 0.0              | 0.0        | 1.0        | 102               | 3.9        | 0.0        | 98                | 98.0                           | 3.1                     | 0.0               | 52.0       |
| Singapore *         | 2000-2014       | 1,480              | 0.0              | 1.1        | 0.9        | 1,450             | 0.9        | 0.2        | 1,434             | 96.9                           | 0.8                     | 0.0               | 0.0        |
| Taiwan *            | 2000-2014       | 28,053             | 0.0              | 1.3        | 0.0        | 27,680            | 0.0        | 0.0        | 27,680            | 97.9                           | 0.1                     | 0.0               | 0.0        |

Web-table 2.1: Data quality indicators, patients diagnosed during 2000-2014, by continent, country and registry: OESOPHAGUS

|                                | Calendar period | Patients submitted | Ineligible (%) ¶ |            |            | Excluded (%) ¶¶   |            |            | Patients included | Data quality indicators (%) †† |                         |                   |            |
|--------------------------------|-----------------|--------------------|------------------|------------|------------|-------------------|------------|------------|-------------------|--------------------------------|-------------------------|-------------------|------------|
|                                |                 |                    | Incomplete dates | In situ    | Other      | Eligible patients | DCO        | Other      |                   | MV                             | Non-specific morphology | Lost to follow-up | Censored   |
| Thai registries                | 2000-2014       | 3,724              | 0.0              | 0.1        | 0.3        | 3,711             | 3.6        | 6.3        | 3,344             | 79.2                           | 21.2                    | 0.1               | 2.6        |
| Bangkok                        | 2000-2012       | 1,745              | 0.0              | 0.2        | 0.5        | 1,733             | 4.8        | 13.0       | 1,423             | 75.8                           | 24.2                    | 0.0               | 0.0        |
| Khon Kaen                      | 2000-2014       | 212                | 0.0              | 0.0        | 0.0        | 212               | 1.9        | 0.0        | 208               | 75.5                           | 25.0                    | 0.0               | 7.2        |
| Lampang                        | 2000-2014       | 179                | 0.0              | 0.0        | 0.0        | 179               | 2.8        | 0.0        | 174               | 81.0                           | 19.0                    | 0.0               | 0.0        |
| Lamphun                        | 2000-2014       | 88                 | 0.0              | 0.0        | 0.0        | 88                | 0.0        | 0.0        | 88                | 61.4                           | 38.6                    | 0.0               | 0.0        |
| Lopburi                        | 2000-2014       | 480                | 0.0              | 0.0        | 0.0        | 480               | 4.8        | 0.0        | 457               | 72.0                           | 28.0                    | 0.0               | 12.5       |
| Songkhla                       | 2000-2014       | 1,020              | 0.0              | 0.0        | 0.1        | 1,019             | 1.9        | 0.6        | 994               | 89.6                           | 11.9                    | 0.4               | 1.4        |
| Turkish registries             | 2000-2012       | 3,675              | 1.4              | 0.8        | 0.1        | 3,591             | 1.2        | 0.2        | 3,541             | 94.4                           | 7.8                     | 0.1               | 5.1        |
| Ankara                         | 2008-2012       | 975                | 0.0              | 1.1        | 0.1        | 963               | 0.1        | 0.0        | 962               | 99.0                           | 2.8                     | 0.0               | 1.0        |
| Antalya                        | 2006-2012       | 153                | 0.0              | 1.3        | 0.0        | 151               | 0.0        | 0.0        | 151               | 93.4                           | 8.6                     | 0.0               | 0.7        |
| Bursa                          | 2006-2012       | 330                | 5.5              | 0.0        | 0.0        | 312               | 2.6        | 0.0        | 304               | 92.8                           | 10.2                    | 0.0               | 0.0        |
| Edirne                         | 2006-2012       | 50                 | 12.0             | 0.0        | 0.0        | 44                | 6.8        | 0.0        | 41                | 87.8                           | 14.6                    | 0.0               | 0.0        |
| Erzurum                        | 2006-2012       | 613                | 0.5              | 0.2        | 0.0        | 609               | 0.2        | 0.7        | 604               | 90.1                           | 12.7                    | 0.0               | 2.0        |
| Eskisehir                      | 2006-2012       | 100                | 0.0              | 0.0        | 0.0        | 100               | 0.0        | 1.0        | 99                | 94.9                           | 0.0                     | 1.0               | 0.0        |
| Izmir                          | 2000-2013       | 1,177              | 2.0              | 0.9        | 0.2        | 1,141             | 2.5        | 0.1        | 1,112             | 93.7                           | 9.1                     | 0.1               | 13.8       |
| Samsun                         | 2006-2012       | 203                | 0.0              | 2.5        | 0.0        | 198               | 1.0        | 0.0        | 196               | 94.9                           | 6.6                     | 0.5               | 0.0        |
| Trabzon                        | 2006-2012       | 74                 | 1.4              | 0.0        | 0.0        | 73                | 1.4        | 0.0        | 72                | 91.7                           | 9.7                     | 0.0               | 6.9        |
| <b>EUROPE</b>                  |                 | <b>309,985</b>     | <b>0.1</b>       | <b>1.5</b> | <b>0.5</b> | <b>303,241</b>    | <b>2.5</b> | <b>0.3</b> | <b>294,606</b>    | <b>95.8</b>                    | <b>2.3</b>              | <b>0.4</b>        | <b>0.8</b> |
| Austria *                      | 2000-2014       | 5,915              | 0.0              | 0.9        | 0.1        | 5,856             | 8.5        | 0.6        | 5,324             | 97.9                           | 6.3                     | 0.0               | 0.0        |
| Belarus (Childhood) †          | -               | -                  | -                | -          | -          | -                 | -          | -          | -                 | -                              | -                       | -                 | -          |
| Belgium *                      | 2004-2014       | 10,981             | 0.0              | 6.8        | 0.0        | 10,230            | 0.0        | 0.4        | 10,191            | 99.5                           | 0.7                     | 0.7               | 0.0        |
| Bulgaria *                     | -               | -                  | -                | -          | -          | -                 | -          | -          | -                 | -                              | -                       | -                 | -          |
| Croatia *                      | 2000-2014       | 3,297              | 0.0              | 0.2        | 0.0        | 3,290             | 8.5        | 0.1        | 3,007             | 77.1                           | 0.3                     | 0.0               | 0.0        |
| Czech Republic *               | 2000-2014       | 8,050              | 0.0              | 0.8        | 0.3        | 7,958             | 2.0        | 0.4        | 7,764             | 92.0                           | 0.6                     | 0.0               | 0.0        |
| Denmark *                      | 2000-2014       | 6,562              | 0.0              | 0.0        | 0.1        | 6,556             | 0.0        | 0.0        | 6,556             | 98.3                           | 3.6                     | 0.1               | 0.0        |
| Estonia *                      | 2000-2012       | 833                | 0.0              | 0.1        | 0.1        | 831               | 5.3        | 0.1        | 786               | 89.2                           | 0.9                     | 0.0               | 0.0        |
| Finland *                      | 2000-2014       | 3,862              | 0.5              | 0.0        | 0.3        | 3,831             | 3.8        | 0.0        | 3,686             | 95.8                           | 1.4                     | 0.1               | 0.0        |
| French registries              | 2000-2010       | 10,017             | 0.1              | 0.0        | 0.0        | 10,002            | 0.0        | 0.4        | 9,958             | 97.3                           | 0.3                     | 0.6               | 0.0        |
| Bas-Rhin                       | 2000-2010       | 898                | 0.0              | 0.0        | 0.0        | 898               | 0.0        | 0.1        | 897               | 98.7                           | 0.0                     | 0.1               | 0.0        |
| Basse Normandie                | -               | -                  | -                | -          | -          | -                 | -          | -          | -                 | -                              | -                       | -                 | -          |
| Burgundy Digestive             | 2000-2010       | 992                | 0.0              | 0.0        | 0.1        | 991               | 0.0        | 0.1        | 990               | 95.5                           | 0.3                     | 0.6               | 0.0        |
| Calvados                       | -               | -                  | -                | -          | -          | -                 | -          | -          | -                 | -                              | -                       | -                 | -          |
| Calvados Digestive             | 2000-2010       | 798                | 0.1              | 0.0        | 0.0        | 797               | 0.0        | 0.1        | 796               | 95.9                           | 1.0                     | 0.0               | 0.0        |
| Côte-d'Or Gynaecologic         | -               | -                  | -                | -          | -          | -                 | -          | -          | -                 | -                              | -                       | -                 | -          |
| Côte-d'Or Haematopoietic       | -               | -                  | -                | -          | -          | -                 | -          | -          | -                 | -                              | -                       | -                 | -          |
| Doubs                          | 2000-2010       | 344                | 0.0              | 0.0        | 0.0        | 344               | 0.0        | 0.0        | 344               | 99.4                           | 0.3                     | 0.3               | 0.0        |
| Finistère                      | 2005-2010       | 825                | 0.1              | 0.0        | 0.0        | 824               | 0.0        | 0.5        | 820               | 97.7                           | 0.2                     | 0.4               | 0.0        |
| Gironde CNS                    | -               | -                  | -                | -          | -          | -                 | -          | -          | -                 | -                              | -                       | -                 | -          |
| Gironde General                | 2005-2010       | 354                | 1.7              | 0.0        | 0.0        | 348               | 0.0        | 0.0        | 348               | 95.1                           | 0.3                     | 1.4               | 0.0        |
| Gironde Haematopoietic         | -               | -                  | -                | -          | -          | -                 | -          | -          | -                 | -                              | -                       | -                 | -          |
| Haut-Rhin                      | 2000-2010       | 594                | 0.0              | 0.0        | 0.0        | 594               | 0.0        | 0.5        | 591               | 99.3                           | 0.0                     | 0.7               | 0.0        |
| Haute-Vienne                   | 2009-2009       | 27                 | 0.0              | 0.0        | 0.0        | 27                | 0.0        | 0.0        | 27                | 96.3                           | 0.0                     | 0.0               | 0.0        |
| Hérault                        | 2000-2010       | 677                | 0.0              | 0.0        | 0.0        | 677               | 0.0        | 0.1        | 676               | 96.2                           | 0.0                     | 0.4               | 0.0        |
| Isère                          | 2000-2010       | 685                | 0.0              | 0.0        | 0.1        | 684               | 0.0        | 0.0        | 684               | 97.5                           | 0.1                     | 0.4               | 0.0        |
| Lille Metro                    | 2008-2010       | 239                | 0.0              | 0.0        | 0.0        | 239               | 0.0        | 0.0        | 239               | 93.7                           | 0.0                     | 0.0               | 0.0        |
| Loire-Atlantique               | 2000-2010       | 1,918              | 0.3              | 0.0        | 0.0        | 1,913             | 0.0        | 1.5        | 1,885             | 98.4                           | 0.4                     | 1.3               | 0.0        |
| Manche                         | 2000-2010       | 660                | 0.0              | 0.0        | 0.0        | 660               | 0.0        | 0.2        | 659               | 98.3                           | 0.0                     | 0.5               | 0.0        |
| Somme                          | 2000-2010       | 710                | 0.0              | 0.0        | 0.0        | 710               | 0.0        | 0.6        | 706               | 96.6                           | 1.0                     | 0.6               | 0.0        |
| Tarn                           | 2000-2010       | 296                | 0.0              | 0.0        | 0.0        | 296               | 0.0        | 0.0        | 296               | 97.0                           | 0.0                     | 0.7               | 0.0        |
| France Childhood Haem †        | -               | -                  | -                | -          | -          | -                 | -          | -          | -                 | -                              | -                       | -                 | -          |
| France Childhood Solid †       | -               | -                  | -                | -          | -          | -                 | -          | -          | -                 | -                              | -                       | -                 | -          |
| German registries              | 2000-2014       | 30,779             | 0.4              | 0.8        | 0.2        | 30,367            | 10.2       | 0.2        | 27,208            | 97.9                           | 0.4                     | 0.2               | 8.2        |
| Brandenburg                    | 2000-2014       | 2,993              | 0.0              | 1.2        | 0.1        | 2,956             | 9.3        | 0.2        | 2,674             | 97.5                           | 0.5                     | 0.0               | 9.1        |
| Bremen                         | 2000-2013       | 936                | 0.0              | 2.2        | 0.3        | 912               | 5.5        | 0.1        | 861               | 97.9                           | 0.1                     | 2.4               | 0.0        |
| Hamburg                        | 2000-2013       | 2,249              | 0.0              | 0.0        | 0.0        | 2,249             | 11.8       | 0.0        | 1,983             | 99.7                           | 0.4                     | 1.1               | 0.0        |
| Lower Saxony                   | 2003-2013       | 7,051              | 1.7              | 0.0        | 0.1        | 6,920             | 9.1        | 0.3        | 6,270             | 99.9                           | 0.1                     | 0.0               | 11.6       |
| Mecklenburg-W. Pomerania       | 2000-2014       | 2,262              | 0.0              | 0.8        | 0.2        | 2,239             | 6.9        | 0.0        | 2,084             | 97.4                           | 0.1                     | 0.0               | 8.7        |
| Rhineland Palatinate           | 2000-2013       | 4,095              | 0.0              | 1.2        | 0.1        | 4,043             | 14.8       | 0.1        | 3,443             | 93.6                           | 0.0                     | 0.0               | 14.5       |
| Saarland                       | 2000-2012       | 1,014              | 0.0              | 2.0        | 0.0        | 994               | 3.6        | 0.6        | 952               | 99.4                           | 0.7                     | 0.0               | 0.0        |
| Saxony                         | 2000-2014       | 4,802              | 0.0              | 0.9        | 0.3        | 4,743             | 7.9        | 0.2        | 4,359             | 97.0                           | 1.0                     | 0.0               | 8.4        |
| Schleswig-Holstein             | 2000-2012       | 3,163              | 0.0              | 0.9        | 0.4        | 3,121             | 14.2       | 0.2        | 2,672             | 99.5                           | 0.6                     | 0.0               | 0.0        |
| Thuringia                      | 2000-2014       | 2,214              | 0.0              | 0.9        | 0.2        | 2,190             | 12.5       | 0.3        | 1,910             | 97.7                           | 0.3                     | 0.0               | 11.5       |
| Gibraltar *                    | 2000-2009       | 14                 | 14.3             | 0.0        | 0.0        | 12                | 0.0        | 0.0        | 12                | 100.0                          | 0.0                     | 0.0               | 25.0       |
| Greece (National Paediatric) † | -               | -                  | -                | -          | -          | -                 | -          | -          | -                 | -                              | -                       | -                 | -          |
| Iceland *                      | 2000-2014       | 273                | 0.0              | 0.0        | 0.0        | 273               | 0.7        | 0.0        | 271               | 98.9                           | 1.1                     | 0.0               | 0.0        |
| Ireland *                      | 2000-2013       | 5,087              | 0.0              | 2.2        | 0.1        | 4,971             | 1.2        | 0.2        | 4,899             | 95.0                           | 0.8                     | 0.0               | 0.0        |
| Italian registries             | 2000-2014       | 12,344             | 0.0              | 0.2        | 0.1        | 12,316            | 0.8        | 0.0        | 12,219            | 87.7                           | 13.5                    | 0.3               | 0.3        |
| Alto Adige                     | 2000-2010       | 292                | 0.0              | 0.0        | 0.0        | 292               | 0.7        | 0.0        | 290               | 96.9                           | 3.1                     | 0.0               | 0.0        |
| Barletta-Andria-Trani          | 2006-2012       | 34                 | 0.0              | 0.0        | 0.0        | 34                | 0.0        | 0.0        | 34                | 79.4                           | 20.6                    | 0.0               | 0.0        |
| Basilicata                     | 2006-2010       | 77                 | 0.0              | 0.0        | 0.0        | 77                | 0.0        | 0.0        | 77                | 90.9                           | 10.4                    | 0.0               | 0.0        |
| Bergamo                        | 2007-2012       | 302                | 0.0              | 0.0        | 0.0        | 302               | 0.0        | 0.0        | 302               | 88.1                           | 12.6                    | 0.0               | 0.0        |
| Biella-Vercelli                | 2000-2010       | 161                | 0.0              | 1.2        | 0.0        | 159               | 1.9        | 0.0        | 156               | 91.0                           | 9.0                     | 0.0               | 1.3        |
| Brescia                        | 2000-2008       | 555                | 0.0              | 0.0        | 0.0        | 555               | 0.0        | 0.0        | 555               | 81.8                           | 18.6                    | 0.0               | 0.2        |
| Brindisi                       | 2006-2008       | 20                 | 0.0              | 0.0        | 0.0        | 20                | 0.0        | 0.0        | 20                | 70.0                           | 30.0                    | 0.0               | 0.0        |
| Caserta                        | 2008-2010       | 38                 | 0.0              | 0.0        | 0.0        | 38                | 0.0        | 0.0        | 38                | 78.9                           | 21.1                    | 0.0               | 0.0        |
| Catania-Messina-Enna           | 2003-2012       | 306                | 0.0              | 0.0        | 0.0        | 306               | 2.9        | 0.0        | 297               | 80.5                           | 25.6                    | 0.0               | 1.7        |
| Catanzaro                      | 2003-2009       | 43                 | 0.0              | 0.0        | 0.0        | 43                | 0.0        | 0.0        | 43                | 79.1                           | 23.3                    | 2.3               | 0.0        |
| Como                           | 2003-2011       | 178                | 0.0              | 0.0        | 0.0        | 178               | 0.0        | 0.0        | 178               | 91.0                           | 9.0                     | 0.6               | 0.0        |
| Cremona                        | 2005-2010       | 157                | 0.0              | 0.0        | 0.0        | 157               | 0.0        | 0.0        | 157               | 84.7                           | 15.9                    | 1.3               | 0.0        |
| Ferrara                        | 2000-2011       | 226                | 0.0              | 0.0        | 0.0        | 226               | 0.4        | 0.0        | 225               | 88.4                           | 11.6                    | 0.0               | 0.0        |
| Friuli-Venezia-Giulia          | 2000-2010       | 1,095              | 0.0              | 0.0        | 0.1        | 1,094             | 2.1        | 0.0        | 1,071             | 94.2                           | 6.3                     | 0.5               | 0.0        |
| Genoa                          | 2000-2009       | 465                | 0.0              | 0.6        | 0.6        | 459               | 0.2        | 0.0        | 458               | 86.5                           | 14.2                    | 0.0               | 0.0        |
| Latina                         | 2000-2011       | 159                | 0.0              | 0.0        | 0.0        | 159               | 0.0        | 0.0        | 159               | 76.7                           | 23.3                    | 1.3               | 3.1        |
| Lecce                          | 2003-2008       | 131                | 0.0              | 0.0        | 0.0        | 131               | 0.0        | 0.0        | 131               | 82.4                           | 18.3                    | 0.0               | 0.0        |

Web-table 2.1: Data quality indicators, patients diagnosed during 2000-2014, by continent, country and registry: OESOPHAGUS

|                      | Calendar period | Patients submitted | Ineligible (%) ¶ |         |       | Excluded (%)      |      |       | Patients included | Data quality indicators (%) †† |                         |                   |          |
|----------------------|-----------------|--------------------|------------------|---------|-------|-------------------|------|-------|-------------------|--------------------------------|-------------------------|-------------------|----------|
|                      |                 |                    | Incomplete dates | In situ | Other | Eligible patients | DCO  | Other |                   | MV                             | Non-specific morphology | Lost to follow-up | Censored |
| Mantova              | 2000-2010       | 211                | 0.0              | 0.0     | 0.0   | 211               | 0.5  | 0.0   | 210               | 92.4                           | 9.5                     | 0.0               | 0.0      |
| Milano               | 2000-2012       | 1,076              | 0.0              | 0.0     | 0.0   | 1,076             | 0.2  | 0.0   | 1,074             | 87.0                           | 13.8                    | 1.6               | 0.7      |
| Modena               | 2000-2012       | 259                | 0.0              | 3.5     | 0.0   | 250               | 0.0  | 0.0   | 250               | 94.0                           | 6.0                     | 0.0               | 0.0      |
| Monza-Brianza        | 2007-2012       | 202                | 0.0              | 0.0     | 0.0   | 202               | 0.5  | 0.0   | 201               | 84.6                           | 17.4                    | 0.0               | 0.0      |
| Naples               | 2000-2012       | 176                | 0.0              | 0.0     | 0.0   | 176               | 0.0  | 1.1   | 174               | 83.9                           | 17.2                    | 1.1               | 0.0      |
| Nuoro                | 2003-2012       | 107                | 0.0              | 0.0     | 0.0   | 107               | 0.0  | 0.0   | 107               | 90.7                           | 10.3                    | 0.0               | 0.0      |
| Palermo              | 2003-2012       | 208                | 0.0              | 0.0     | 0.0   | 208               | 1.9  | 0.0   | 204               | 75.5                           | 25.5                    | 0.0               | 0.0      |
| Parma                | 2000-2014       | 318                | 0.0              | 1.3     | 0.0   | 314               | 0.0  | 0.0   | 314               | 91.7                           | 8.3                     | 1.3               | 0.3      |
| Pavia                | 2003-2009       | 190                | 0.0              | 0.0     | 0.0   | 190               | 0.0  | 0.0   | 190               | 82.1                           | 18.4                    | 0.0               | 0.5      |
| Piacenza             | 2006-2011       | 79                 | 0.0              | 0.0     | 0.0   | 79                | 0.0  | 0.0   | 79                | 86.1                           | 15.2                    | 0.0               | 0.0      |
| Ragusa               | 2000-2012       | 78                 | 0.0              | 0.0     | 0.0   | 78                | 3.8  | 0.0   | 75                | 81.3                           | 25.3                    | 0.0               | 0.0      |
| Reggio Emilia        | 2000-2012       | 210                | 0.0              | 0.0     | 0.0   | 210               | 0.0  | 0.0   | 210               | 87.6                           | 13.8                    | 0.0               | 0.0      |
| Romagna              | 2000-2012       | 386                | 0.0              | 0.3     | 0.0   | 385               | 0.0  | 0.0   | 385               | 87.0                           | 14.0                    | 0.0               | 0.0      |
| Salerno              | 2000-2009       | 202                | 0.0              | 0.0     | 0.0   | 202               | 0.0  | 0.0   | 202               | 74.8                           | 25.7                    | 0.0               | 2.0      |
| Sassari              | 2000-2011       | 246                | 0.0              | 0.0     | 0.0   | 246               | 1.6  | 0.0   | 242               | 91.3                           | 9.9                     | 0.0               | 0.0      |
| Siracusa             | 2000-2012       | 80                 | 0.0              | 0.0     | 0.0   | 80                | 3.8  | 0.0   | 77                | 83.1                           | 18.2                    | 0.0               | 0.0      |
| Sondrio              | 2000-2011       | 156                | 0.0              | 0.0     | 0.0   | 156               | 0.0  | 0.0   | 156               | 87.8                           | 13.5                    | 0.0               | 0.0      |
| Taranto              | 2006-2012       | 65                 | 0.0              | 0.0     | 0.0   | 65                | 4.6  | 0.0   | 62                | 80.6                           | 19.4                    | 0.0               | 0.0      |
| Trapani              | 2002-2010       | 87                 | 0.0              | 0.0     | 0.0   | 87                | 3.4  | 1.1   | 83                | 75.9                           | 31.3                    | 0.0               | 0.0      |
| Trento               | 2000-2010       | 438                | 0.0              | 0.0     | 0.0   | 438               | 1.4  | 0.0   | 432               | 95.6                           | 15.0                    | 0.0               | 0.0      |
| Turin                | 2000-2012       | 485                | 0.0              | 0.0     | 0.0   | 485               | 0.8  | 0.0   | 481               | 91.1                           | 9.4                     | 0.8               | 0.0      |
| Tuscany              | 2000-2009       | 356                | 0.0              | 0.3     | 0.6   | 353               | 1.4  | 0.0   | 348               | 81.0                           | 20.1                    | 0.0               | 0.3      |
| Umbria               | 2000-2013       | 341                | 0.0              | 0.0     | 0.3   | 340               | 1.2  | 0.0   | 336               | 88.4                           | 11.6                    | 0.3               | 0.3      |
| Varese               | 2000-2012       | 518                | 0.0              | 0.0     | 0.0   | 518               | 0.2  | 0.0   | 517               | 90.9                           | 9.1                     | 0.2               | 0.0      |
| Veneto               | 2000-2009       | 1,585              | 0.0              | 0.0     | 0.1   | 1,584             | 0.4  | 0.0   | 1,578             | 88.3                           | 12.3                    | 0.1               | 0.4      |
| Viterbo              | 2006-2010       | 46                 | 0.0              | 0.0     | 0.0   | 46                | 10.9 | 0.0   | 41                | 75.6                           | 24.4                    | 0.0               | 4.9      |
| Piedmont Childhood   | -               | -                  | -                | -       | -     | -                 | -    | -     | -                 | -                              | -                       | -                 | -        |
| Latvia *             | 2000-2014       | 1,803              | 0.0              | 0.0     | 27.9  | 1,300             | 0.0  | 0.5   | 1,294             | 100.0                          | 0.5                     | 0.0               | 0.0      |
| Lithuania *          | 2000-2012       | 2,340              | 0.0              | 0.0     | 0.1   | 2,338             | 8.9  | 0.0   | 2,130             | 81.5                           | 0.6                     | 0.0               | 0.0      |
| Malta *              | 2000-2013       | 197                | 0.0              | 0.0     | 0.0   | 197               | 6.1  | 0.5   | 184               | 95.1                           | 6.0                     | 0.0               | 0.0      |
| Netherlands *        | 2000-2014       | 26,198             | 0.0              | 1.3     | 0.0   | 25,840            | 0.1  | 1.8   | 25,342            | 98.7                           | 1.4                     | 0.1               | 0.0      |
| Norway *             | 2000-2014       | 3,832              | 0.0              | 1.3     | 19.5  | 3,036             | 0.4  | 0.1   | 3,021             | 99.9                           | 0.3                     | 0.0               | 0.0      |
| Poland *             | 2000-2014       | 19,684             | 0.0              | 0.0     | 0.0   | 19,680            | 3.4  | 0.3   | 18,959            | 87.6                           | 0.5                     | 0.0               | 0.0      |
| Greater Poland       | 2000-2014       | 1,836              | 0.0              | 0.0     | 0.0   | 1,836             | 5.0  | 0.4   | 1,737             | 89.6                           | 0.7                     | 0.0               | 0.0      |
| Holy Cross           | 2000-2014       | 630                | 0.0              | 0.0     | 0.0   | 630               | 3.3  | 0.2   | 608               | 93.1                           | 1.3                     | 0.0               | 0.0      |
| Kujavia-Pomerania    | 2000-2014       | 1,049              | 0.0              | 0.0     | 0.0   | 1,049             | 1.1  | 0.1   | 1,036             | 95.6                           | 0.5                     | 0.0               | 0.0      |
| Lesser Poland        | 2000-2014       | 1,605              | 0.0              | 0.0     | 0.0   | 1,605             | 5.3  | 0.1   | 1,518             | 90.3                           | 1.3                     | 0.0               | 0.0      |
| Łódź                 | 2000-2014       | 1,435              | 0.0              | 0.0     | 0.0   | 1,435             | 0.8  | 1.0   | 1,408             | 78.8                           | 0.1                     | 0.0               | 0.0      |
| Lower Silesia        | 2000-2014       | 1,648              | 0.0              | 0.2     | 0.0   | 1,645             | 0.4  | 0.0   | 1,638             | 79.4                           | 0.5                     | 0.1               | 0.0      |
| Lublin               | 2000-2014       | 878                | 0.0              | 0.0     | 0.0   | 878               | 6.4  | 0.3   | 819               | 78.9                           | 0.4                     | 0.0               | 0.0      |
| Lubush               | 2000-2014       | 435                | 0.0              | 0.0     | 0.0   | 435               | 3.0  | 0.0   | 422               | 88.2                           | 1.4                     | 0.0               | 0.0      |
| Mazovia              | 2000-2014       | 1,989              | 0.0              | 0.0     | 0.0   | 1,989             | 0.0  | 0.2   | 1,985             | 89.4                           | 0.2                     | 0.0               | 0.0      |
| Opole                | 2000-2014       | 622                | 0.0              | 0.0     | 0.0   | 622               | 0.2  | 0.3   | 619               | 95.3                           | 0.0                     | 0.0               | 0.0      |
| Podlaha              | 2000-2014       | 629                | 0.0              | 0.0     | 0.0   | 629               | 7.0  | 0.2   | 584               | 87.5                           | 0.3                     | 0.0               | 0.0      |
| Pomerania            | 2000-2014       | 1,405              | 0.0              | 0.0     | 0.0   | 1,405             | 13.3 | 0.2   | 1,215             | 94.6                           | 0.1                     | 0.0               | 0.0      |
| Silesia              | 2000-2014       | 3,149              | 0.0              | 0.0     | 0.0   | 3,149             | 1.3  | 0.1   | 3,105             | 86.0                           | 0.4                     | 0.0               | 0.0      |
| Subcarpathia         | 2000-2014       | 849                | 0.0              | 0.0     | 0.0   | 849               | 3.7  | 0.7   | 812               | 95.2                           | 0.0                     | 0.0               | 0.0      |
| Varmia-Mazuria       | 2000-2014       | 636                | 0.0              | 0.0     | 0.2   | 635               | 0.9  | 0.0   | 629               | 93.3                           | 1.0                     | 0.0               | 0.2      |
| West Pomerania       | 2000-2014       | 889                | 0.0              | 0.0     | 0.0   | 889               | 7.1  | 0.2   | 824               | 78.9                           | 0.0                     | 0.0               | 0.0      |
| Portugal *           | 2000-2014       | 6,299              | 1.5              | 0.7     | 0.6   | 6,129             | 0.1  | 0.0   | 6,122             | 96.9                           | 1.9                     | 1.5               | 0.0      |
| Azores               | 2000-2014       | 153                | 0.0              | 0.0     | 0.0   | 153               | 3.9  | 0.0   | 147               | 91.8                           | 8.2                     | 1.4               | 2.0      |
| Portugal Central     | 2007-2010       | 433                | 0.0              | 0.0     | 0.0   | 433               | 0.0  | 0.0   | 433               | 97.2                           | 3.2                     | 0.5               | 0.0      |
| Portugal North       | 2000-2010       | 2,102              | 4.3              | 0.0     | 0.2   | 2,007             | 0.0  | 0.0   | 2,007             | 98.6                           | 2.5                     | 0.0               | 0.0      |
| Portugal South       | 2000-2014       | 3,611              | 0.0              | 1.2     | 0.9   | 3,536             | 0.0  | 0.0   | 3,535             | 96.2                           | 1.1                     | 2.4               | 0.0      |
| Romania (Cluj)       | 2006-2012       | 259                | 0.0              | 0.8     | 0.0   | 257               | 16.0 | 0.0   | 216               | 91.2                           | 9.7                     | 0.0               | 0.0      |
| Russian registries ‡ | 2000-2014       | 6,085              | 0.0              | 0.1     | 0.0   | 6,078             | 0.9  | 0.4   | 6,000             | 87.1                           | 2.6                     | 1.0               | 0.2      |
| Arkhangelsk          | 2000-2014       | 1,941              | 0.0              | 0.1     | 0.0   | 1,939             | 0.9  | 0.4   | 1,913             | 85.0                           | 2.8                     | 0.2               | 0.0      |
| Karelia              | 2000-2014       | 924                | 0.0              | 0.0     | 0.2   | 922               | 1.4  | 0.3   | 906               | 88.7                           | 5.6                     | 0.6               | 0.3      |
| Omsk                 | 2001-2014       | 663                | 0.0              | 0.0     | 0.0   | 663               | 0.0  | 0.3   | 661               | 98.2                           | 4.8                     | 2.6               | 0.3      |
| Samara               | 2000-2014       | 2,068              | 0.0              | 0.0     | 0.0   | 2,067             | 1.1  | 0.2   | 2,041             | 84.4                           | 0.8                     | 1.5               | 0.0      |
| Tomsk                | 2005-2014       | 489                | 0.0              | 0.4     | 0.0   | 487               | 0.0  | 1.6   | 479               | 88.7                           | 0.6                     | 1.3               | 1.7      |
| Slovakia *           | 2000-2010       | 3,115              | 0.0              | 0.3     | 0.0   | 3,104             | 10.0 | 0.0   | 2,794             | 94.9                           | 5.4                     | 0.0               | 0.0      |
| Slovenia *           | 2000-2013       | 1,244              | 0.0              | 0.0     | 0.4   | 1,239             | 3.0  | 0.0   | 1,202             | 93.3                           | 0.3                     | 0.2               | 0.0      |
| Spanish registries   | 2000-2013       | 5,811              | 0.1              | 0.7     | 0.2   | 5,746             | 1.8  | 0.1   | 5,637             | 95.7                           | 1.2                     | 0.4               | 0.0      |
| Basque Country       | 2000-2013       | 2,229              | 0.0              | 0.0     | 0.1   | 2,227             | 1.0  | 0.2   | 2,201             | 96.4                           | 0.0                     | 0.3               | 0.0      |
| Canaries             | 2000-2011       | 1,043              | 0.0              | 1.2     | 0.1   | 1,030             | 1.7  | 0.0   | 1,012             | 94.9                           | 0.3                     | 0.7               | 0.0      |
| Girona               | 2000-2013       | 579                | 0.5              | 4.0     | 0.5   | 550               | 2.2  | 0.4   | 536               | 95.0                           | 5.8                     | 0.9               | 0.0      |
| Granada              | 2000-2012       | 356                | 0.0              | 0.0     | 0.3   | 355               | 3.7  | 0.0   | 342               | 90.9                           | 0.0                     | 0.3               | 0.0      |
| Mallorca             | 2000-2012       | 451                | 0.4              | 1.6     | 0.2   | 441               | 2.5  | 0.0   | 430               | 97.4                           | 1.6                     | 0.2               | 0.0      |
| Murcia               | 2000-2010       | 452                | 0.0              | 0.0     | 0.2   | 451               | 1.6  | 0.0   | 444               | 95.3                           | 5.2                     | 0.0               | 0.0      |
| Navarra              | 2000-2010       | 317                | 0.0              | 0.0     | 0.0   | 317               | 1.6  | 0.0   | 312               | 96.5                           | 0.3                     | 0.0               | 0.0      |
| Tarragona            | 2000-2011       | 384                | 0.8              | 0.3     | 1.3   | 375               | 4.0  | 0.0   | 360               | 97.5                           | 0.6                     | 0.0               | 0.0      |
| Spain Childhood      | -               | -                  | -                | -       | -     | -                 | -    | -     | -                 | -                              | -                       | -                 | -        |
| Valencia Childhood   | -               | -                  | -                | -       | -     | -                 | -    | -     | -                 | -                              | -                       | -                 | -        |
| Sweden *             | 2000-2014       | 6,847              | 0.0              | 5.8     | 1.7   | 6,339             | 1.5  | 0.2   | 6,233             | 99.4                           | 0.9                     | 0.0               | 0.0      |
| Swiss registries     | 2000-2014       | 3,682              | 0.0              | 0.7     | 0.6   | 3,634             | 1.1  | 0.3   | 3,583             | 97.9                           | 1.5                     | 1.7               | 1.5      |
| Basel                | 2000-2011       | 226                | 0.0              | 0.0     | 0.4   | 225               | 0.4  | 4.4   | 214               | 100.0                          | 0.0                     | 0.0               | 2.3      |
| Fribourg             | 2006-2014       | 152                | 0.0              | 0.0     | 0.7   | 151               | 0.0  | 0.7   | 150               | 98.7                           | 1.3                     | 0.0               | 0.0      |
| Geneva               | 2000-2013       | 465                | 0.0              | 3.0     | 0.0   | 451               | 1.3  | 0.0   | 445               | 96.4                           | 4.0                     | 1.8               | 0.0      |
| Graubünden-Glarus    | 2000-2014       | 238                | 0.0              | 0.0     | 0.4   | 237               | 0.0  | 0.0   | 237               | 97.9                           | 0.8                     | 14.3              | 0.0      |
| Neuchâtel            | 2000-2014       | 219                | 0.0              | 3.2     | 5.9   | 199               | 1.0  | 0.0   | 197               | 97.5                           | 1.0                     | 1.5               | 2.0      |
| St Gallen-Appenzell  | 2000-2014       | 492                | 0.0              | 0.0     | 0.0   | 492               | 0.0  | 0.0   | 492               | 98.8                           | 0.0                     | 1.4               | 0.0      |
| Ticino               | 2000-2014       | 394                | 0.0              | 0.0     | 0.0   | 394               | 0.8  | 0.0   | 391               | 98.7                           | 1.5                     | 0.8               | 0.0      |
| Valais               | 2000-2014       | 366                | 0.0              | 1.6     | 0.5   | 358               | 0.0  | 0.0   | 358               | 96.1                           | 0.0                     | 0.3               | 0.0      |

Web-table 2.1: Data quality indicators, patients diagnosed during 2000-2014, by continent, country and registry: OESOPHAGUS

|                              | Calendar period | Patients submitted | Ineligible (%) ¶ |            |            | Eligible patients | Excluded (%) ¶¶ |            | Patients included | Data quality indicators (%) †† |                         |                   |            |
|------------------------------|-----------------|--------------------|------------------|------------|------------|-------------------|-----------------|------------|-------------------|--------------------------------|-------------------------|-------------------|------------|
|                              |                 |                    | Incomplete dates | In situ    | Other      |                   | DCO             | Other      |                   | MV                             | Non-specific morphology | Lost to follow-up | Censored   |
| Zürich                       | 2000-2013       | 1,130              | 0.0              | 0.0        | 0.3        | 1,127             | 2.5             | 0.0        | 1,099             | 98.1                           | 2.3                     | 0.5               | 3.9        |
| Switzerland (Childhood) †    | -               | -                  |                  |            |            |                   |                 |            |                   |                                |                         |                   |            |
| United Kingdom *             | 2000-2014       | 124,575            | 0.1              | 2.1        | 0.0        | 121,831           | 1.3             | 0.2        | 120,008           | 97.3                           | 2.5                     | 0.5               | 0.0        |
| England                      | 2000-2014       | 102,309            | 0.1              | 2.3        | 0.0        | 99,853            | 1.4             | 0.2        | 98,253            | 97.8                           | 2.6                     | 0.7               | 0.0        |
| Northern Ireland             | 2000-2014       | 2,676              | 0.0              | 0.9        | 0.1        | 2,650             | 0.6             | 0.1        | 2,631             | 92.6                           | 7.8                     | 0.0               | 0.0        |
| Scotland                     | 2000-2014       | 12,872             | 0.0              | 1.6        | 0.1        | 12,652            | 0.4             | 0.0        | 12,599            | 94.0                           | 0.3                     | 0.1               | 0.0        |
| Wales                        | 2000-2014       | 6,718              | 0.0              | 0.6        | 0.0        | 6,676             | 2.0             | 0.3        | 6,525             | 98.2                           | 2.7                     | 0.0               | 0.0        |
| <b>OCEANIA</b>               |                 | <b>22,437</b>      | <b>0.2</b>       | <b>0.5</b> | <b>0.2</b> | <b>22,229</b>     | <b>1.7</b>      | <b>0.5</b> | <b>21,728</b>     | <b>95.9</b>                    | <b>4.1</b>              | <b>0.0</b>        | <b>0.0</b> |
| Australia *                  | 2000-2014       | 18,464             | 0.2              | 0.6        | 0.3        | 18,256            | 1.5             | 0.6        | 17,877            | 96.6                           | 3.4                     | 0.0               | 0.0        |
| Australian Capital Territory | 2000-2013       | 189                | 0.0              | 2.6        | 1.1        | 182               | 1.1             | 0.0        | 180               | 97.2                           | 5.0                     | 0.0               | 0.0        |
| New South Wales              | 2000-2012       | 5,303              | 0.1              | 0.0        | 0.3        | 5,282             | 1.9             | 0.9        | 5,135             | 98.7                           | 1.6                     | 0.0               | 0.0        |
| Northern Territory           | 2000-2013       | 138                | 0.0              | 0.0        | 0.0        | 138               | 0.7             | 0.0        | 137               | 97.1                           | 1.5                     | 0.0               | 0.0        |
| Queensland                   | 2000-2014       | 4,086              | 0.9              | 1.7        | 0.7        | 3,953             | 1.7             | 0.2        | 3,879             | 98.5                           | 1.8                     | 0.0               | 0.0        |
| South Australia              | 2000-2013       | 1,467              | 0.0              | 0.0        | 0.1        | 1,466             | 0.2             | 0.8        | 1,451             | 95.1                           | 1.0                     | 0.0               | 0.0        |
| Tasmania                     | 2000-2013       | 650                | 0.0              | 1.4        | 0.2        | 640               | 1.1             | 1.1        | 626               | 94.9                           | 5.4                     | 0.0               | 0.0        |
| Victoria                     | 2000-2014       | 4,807              | 0.0              | 0.7        | 0.0        | 4,772             | 1.9             | 0.5        | 4,657             | 92.8                           | 7.5                     | 0.0               | 0.0        |
| Western Australia            | 2000-2014       | 1,824              | 0.0              | 0.0        | 0.1        | 1,823             | 0.3             | 0.3        | 1,812             | 98.2                           | 2.0                     | 0.0               | 0.0        |
| New Zealand *                | 2000-2014       | 3,973              | 0.0              | 0.0        | 0.0        | 3,973             | 2.8             | 0.3        | 3,851             | 92.9                           | 7.7                     | 0.0               | 0.0        |
| <b>Total</b>                 |                 | <b>781,094</b>     | <b>0.6</b>       | <b>1.7</b> | <b>0.3</b> | <b>761,211</b>    | <b>3.2</b>      | <b>0.3</b> | <b>734,428</b>    | <b>94.1</b>                    | <b>7.0</b>              | <b>0.6</b>        | <b>0.6</b> |

Web-table 2.2: Data quality indicators, patients diagnosed during 2000-2014, by continent, country and registry: STOMACH

|                                    | Calendar period | Patients submitted | Ineligible (%) ¶ |            |            | Excluded (%) ¶¶   |             |            | Patients included | Data quality indicators (%) †† |                         |                   |             |
|------------------------------------|-----------------|--------------------|------------------|------------|------------|-------------------|-------------|------------|-------------------|--------------------------------|-------------------------|-------------------|-------------|
|                                    |                 |                    | Incomplete dates | In situ    | Other      | Eligible patients | DCO         | Other      |                   | MV                             | Non-specific morphology | Lost to follow-up | Censored    |
| <b>AFRICA</b>                      |                 | <b>1,972</b>       | <b>5.9</b>       | <b>0.0</b> | <b>2.0</b> | <b>1,817</b>      | <b>1.9</b>  | <b>2.9</b> | <b>1,731</b>      | <b>95.2</b>                    | <b>14.5</b>             | <b>1.0</b>        | <b>18.1</b> |
| Algerian registries                | 2000-2014       | 1,338              | 8.7              | 0.0        | 2.4        | 1,190             | 2.9         | 2.3        | 1,129             | 98.5                           | 9.9                     | 0.0               | 22.4        |
| Annaba                             | 2000-2014       | 292                | 14.0             | 0.0        | 10.3       | 221               | 4.1         | 0.9        | 210               | 92.4                           | 6.2                     | 0.0               | 82.9        |
| Sétif                              | 2000-2010       | 506                | 14.8             | 0.0        | 0.0        | 431               | 0.0         | 4.6        | 411               | 99.8                           | 14.8                    | 0.0               | 19.0        |
| Tlemcen                            | 2006-2014       | 540                | 0.0              | 0.0        | 0.4        | 538               | 4.6         | 0.9        | 508               | 100.0                          | 7.5                     | 0.0               | 0.2         |
| Mali (Bamako)                      | -               | -                  | -                | -          | -          | -                 | -           | -          | -                 | -                              | -                       | -                 | -           |
| Mauritius *                        | 2005-2012       | 525                | 0.0              | 0.0        | 1.1        | 519               | 0.0         | 4.8        | 494               | 96.8                           | 17.8                    | 0.0               | 4.0         |
| Morocco (Casablanca)               | -               | -                  | -                | -          | -          | -                 | -           | -          | -                 | -                              | -                       | -                 | -           |
| Nigeria (Ibadan)                   | -               | -                  | -                | -          | -          | -                 | -           | -          | -                 | -                              | -                       | -                 | -           |
| South Africa (Eastern Cape)        | 2000-2014       | 109                | 0.0              | 0.0        | 0.9        | 108               | 0.0         | 0.0        | 108               | 53.7                           | 47.2                    | 16.7              | 37.0        |
| <b>AMERICA (Central and South)</b> |                 | <b>79,603</b>      | <b>7.2</b>       | <b>0.2</b> | <b>2.8</b> | <b>71,538</b>     | <b>14.6</b> | <b>0.6</b> | <b>60,643</b>     | <b>88.0</b>                    | <b>10.6</b>             | <b>4.1</b>        | <b>2.3</b>  |
| Argentinian registries             | 2002-2013       | 3,527              | 4.3              | 0.3        | 2.7        | 3,270             | 17.7        | 0.2        | 2,686             | 95.1                           | 6.3                     | 0.0               | 0.0         |
| Chubut                             | 2008-2013       | 330                | 46.1             | 0.0        | 0.6        | 176               | 10.8        | 0.6        | 156               | 84.0                           | 19.9                    | 0.0               | 0.6         |
| Córdoba                            | 2004-2012       | 1,075              | 0.0              | 0.7        | 5.0        | 1,013             | 17.6        | 0.1        | 834               | 95.0                           | 7.0                     | 0.0               | 0.0         |
| Mendoza                            | 2003-2013       | 2,039              | 0.0              | 0.1        | 1.9        | 1,998             | 19.0        | 0.2        | 1,615             | 96.7                           | 4.4                     | 0.0               | 0.0         |
| Tierra del Fuego                   | 2005-2013       | 83                 | 0.0              | 0.0        | 0.0        | 83                | 2.4         | 0.0        | 81                | 87.7                           | 12.3                    | 0.0               | 0.0         |
| Argentina (Childhood) †            | -               | -                  | -                | -          | -          | -                 | -           | -          | -                 | -                              | -                       | -                 | -           |
| Brazilian registries               | 2000-2014       | 22,369             | 19.9             | 0.2        | 2.4        | 17,321            | 10.1        | 0.0        | 15,567            | 87.6                           | 12.6                    | 12.5              | 0.0         |
| Aracaju                            | 2000-2012       | 521                | 2.7              | 0.0        | 0.0        | 507               | 5.9         | 0.0        | 477               | 96.4                           | 4.0                     | 0.0               | 0.0         |
| Cuiabá                             | -               | -                  | -                | -          | -          | -                 | -           | -          | -                 | -                              | -                       | -                 | -           |
| Curitiba                           | 2000-2012       | 2,590              | 0.0              | 0.0        | 0.2        | 2,585             | 20.9        | 0.0        | 2,045             | 95.0                           | 6.1                     | 0.0               | 0.0         |
| Goiânia                            | -               | -                  | -                | -          | -          | -                 | -           | -          | -                 | -                              | -                       | -                 | -           |
| Juá                                | 2000-2014       | 256                | 2.0              | 0.4        | 4.7        | 238               | 0.8         | 0.0        | 236               | 99.2                           | 3.0                     | 0.0               | 1.3         |
| São Paulo                          | 2000-2012       | 19,002             | 23.4             | 0.3        | 2.7        | 13,991            | 8.4         | 0.0        | 12,809            | 85.9                           | 14.2                    | 15.1              | 0.0         |
| Chilean registries                 | 2000-2012       | 4,885              | 0.0              | 0.0        | 2.3        | 4,774             | 7.4         | 0.0        | 4,423             | 86.7                           | 11.2                    | 0.0               | 4.9         |
| Antofagasta                        | 2003-2010       | 612                | 0.0              | 0.0        | 3.1        | 593               | 15.5        | 0.0        | 501               | 88.6                           | 12.2                    | 0.0               | 5.6         |
| Biobío                             | 2003-2012       | 1,357              | 0.0              | 0.0        | 1.8        | 1,333             | 3.7         | 0.0        | 1,284             | 83.4                           | 17.1                    | 0.0               | 2.3         |
| Concepción                         | 2006-2010       | 1,440              | 0.0              | 0.0        | 1.7        | 1,416             | 6.5         | 0.0        | 1,324             | 84.2                           | 15.9                    | 0.0               | 6.1         |
| Los Ríos                           | 2000-2012       | 1,476              | 0.0              | 0.0        | 3.0        | 1,432             | 8.2         | 0.0        | 1,314             | 91.7                           | 0.4                     | 0.0               | 5.8         |
| Colombian registries               | 2000-2014       | 9,384              | 2.6              | 0.0        | 3.4        | 8,819             | 8.8         | 0.6        | 7,988             | 89.5                           | 11.7                    | 0.0               | 11.1        |
| Bucaramanga                        | 2003-2013       | 1,708              | 0.5              | 0.0        | 3.3        | 1,643             | 10.3        | 0.5        | 1,465             | 94.1                           | 8.9                     | 0.1               | 0.0         |
| Cali                               | 2000-2014       | 5,705              | 1.5              | 0.0        | 3.7        | 5,406             | 8.4         | 0.3        | 4,935             | 87.5                           | 12.2                    | 0.0               | 15.6        |
| Manizales                          | 2003-2012       | 836                | 9.7              | 0.0        | 2.8        | 732               | 1.0         | 3.6        | 699               | 91.7                           | 13.4                    | 0.0               | 10.6        |
| Pasto                              | 2000-2012       | 1,135              | 5.7              | 0.3        | 2.6        | 1,038             | 14.2        | 0.2        | 889               | 90.7                           | 12.0                    | 0.0               | 4.6         |
| Costa Rica *                       | 2002-2014       | 9,899              | 0.0              | 0.0        | 2.5        | 9,651             | 10.7        | 0.4        | 8,577             | 88.8                           | 14.7                    | 0.0               | 0.0         |
| Cuba *                             | 2000-2012       | 10,499             | 0.0              | 0.0        | 2.4        | 10,251            | 34.8        | 0.2        | 6,664             | 74.2                           | 5.5                     | 6.6               | 0.0         |
| Ecuadorian registries              | 2000-2014       | 10,054             | 7.8              | 0.2        | 1.5        | 9,094             | 17.6        | 3.1        | 7,210             | 88.9                           | 12.1                    | 0.3               | 1.4         |
| Cuenca                             | 2000-2014       | 998                | 24.9             | 0.6        | 4.3        | 700               | 18.0        | 22.6       | 416               | 84.4                           | 16.6                    | 0.0               | 17.3        |
| Guayaquil                          | 2005-2013       | 2,324              | 0.0              | 0.1        | 0.9        | 2,299             | 14.1        | 5.6        | 1,847             | 85.3                           | 16.0                    | 0.0               | 0.0         |
| Loja                               | 2000-2013       | 708                | 0.0              | 0.7        | 3.5        | 678               | 3.4         | 0.0        | 655               | 87.6                           | 13.6                    | 3.4               | 0.2         |
| Manabí                             | 2000-2013       | 2,408              | 9.5              | 0.0        | 2.7        | 2,114             | 28.2        | 0.0        | 1,517             | 84.8                           | 16.3                    | 0.0               | 0.6         |
| Quito                              | 2000-2013       | 3,616              | 8.4              | 0.3        | 0.0        | 3,303             | 16.0        | 0.0        | 2,775             | 94.6                           | 6.2                     | 0.0               | 0.6         |
| Guadeloupe *                       | 2008-2013       | 523                | 0.0              | 0.0        | 0.4        | 521               | 0.0         | 0.0        | 521               | 99.2                           | 1.3                     | 0.0               | 32.2        |
| Martinique *                       | 2000-2012       | 1,011              | 0.0              | 0.0        | 0.2        | 1,009             | 0.0         | 3.6        | 973               | 98.4                           | 1.0                     | 6.4               | 0.0         |
| Mexico (Childhood) †               | -               | -                  | -                | -          | -          | -                 | -           | -          | -                 | -                              | -                       | -                 | -           |
| Peru (Lima)                        | -               | -                  | -                | -          | -          | -                 | -           | -          | -                 | -                              | -                       | -                 | -           |
| Puerto Rico *                      | 2000-2011       | 4,815              | 2.0              | 0.7        | 8.1        | 4,294             | 8.9         | 0.3        | 3,900             | 98.2                           | 3.3                     | 0.0               | 0.0         |
| Uruguay *                          | 2008-2012       | 2,637              | 0.0              | 0.3        | 3.5        | 2,534             | 15.8        | 0.0        | 2,134             | 89.7                           | 11.7                    | 0.0               | 0.0         |
| <b>AMERICA (North)</b>             |                 | <b>324,323</b>     | <b>0.4</b>       | <b>1.0</b> | <b>9.3</b> | <b>289,360</b>    | <b>1.7</b>  | <b>0.3</b> | <b>283,566</b>    | <b>98.5</b>                    | <b>2.1</b>              | <b>0.8</b>        | <b>0.0</b>  |
| Canadian registries                | 2000-2014       | 36,449             | 0.1              | 0.6        | 4.5        | 34,569            | 1.4         | 0.6        | 33,889            | 95.7                           | 4.6                     | 0.0               | 0.0         |
| Alberta                            | 2000-2014       | 4,026              | 0.2              | 0.9        | 7.9        | 3,664             | 0.4         | 0.2        | 3,643             | 98.3                           | 1.9                     | 0.0               | 0.0         |
| British Columbia                   | 2000-2014       | 6,280              | 0.2              | 1.2        | 11.5       | 5,473             | 1.7         | 0.2        | 5,368             | 98.2                           | 2.0                     | 0.0               | 0.0         |
| Manitoba                           | 2000-2014       | 1,909              | 0.1              | 1.5        | 6.3        | 1,758             | 1.6         | 0.3        | 1,724             | 97.7                           | 2.6                     | 0.0               | 0.0         |
| New Brunswick                      | 2000-2014       | 1,325              | 0.1              | 1.2        | 7.8        | 1,204             | 0.4         | 0.1        | 1,198             | 96.3                           | 0.3                     | 0.0               | 0.0         |
| Newfoundland & Labrador            | 2000-2014       | 1,389              | 0.4              | 1.4        | 6.8        | 1,270             | 2.7         | 0.2        | 1,234             | 98.2                           | 2.1                     | 0.0               | 0.0         |
| Nova Scotia                        | 2000-2014       | 1,522              | 0.3              | 1.1        | 8.3        | 1,375             | 1.2         | 0.1        | 1,357             | 92.4                           | 8.0                     | 0.0               | 0.0         |
| Ontario                            | 2000-2014       | 18,278             | 0.0              | 0.0        | 0.0        | 18,275            | 1.4         | 0.9        | 17,854            | 94.1                           | 6.5                     | 0.0               | 0.0         |
| Prince Edward Island               | 2000-2014       | 195                | 0.0              | 3.6        | 2.6        | 183               | 3.3         | 0.0        | 177               | 96.0                           | 5.1                     | 0.0               | 0.0         |
| Saskatchewan                       | 2000-2014       | 1,525              | 0.0              | 1.5        | 8.9        | 1,367             | 2.0         | 0.4        | 1,334             | 97.3                           | 3.0                     | 0.0               | 0.0         |
| US registries                      | 2000-2014       | 287,874            | 0.5              | 1.1        | 9.9        | 254,791           | 1.7         | 0.3        | 249,677           | 98.9                           | 1.8                     | 0.9               | 0.0         |
| Alabama                            | 2000-2014       | 5,475              | 0.5              | 1.0        | 8.9        | 4,907             | 1.8         | 0.3        | 4,802             | 98.4                           | 2.2                     | 0.0               | 0.0         |
| Alaska                             | 2000-2013       | 601                | 1.3              | 0.7        | 9.5        | 532               | 1.1         | 0.0        | 526               | 98.7                           | 2.5                     | 0.0               | 0.2         |
| Arkansas                           | 2000-2011       | 2,553              | 0.1              | 0.9        | 12.6       | 2,206             | 1.7         | 0.5        | 2,158             | 99.5                           | 0.7                     | 0.0               | 0.0         |
| California                         | 2000-2011       | 35,957             | 1.0              | 0.9        | 9.8        | 31,755            | 0.8         | 0.4        | 31,377            | 98.9                           | 1.6                     | 0.0               | 0.0         |
| Greater Bay Area                   | 2000-2014       | 9,109              | 0.6              | 1.0        | 9.4        | 8,105             | 1.1         | 0.4        | 7,977             | 99.1                           | 1.3                     | 4.8               | 0.0         |
| Greater California                 | 2000-2014       | 21,869             | 1.0              | 0.7        | 9.7        | 19,361            | 0.8         | 0.4        | 19,137            | 98.8                           | 1.9                     | 4.2               | 0.0         |
| Los Angeles                        | 2000-2014       | 14,712             | 1.4              | 0.8        | 8.7        | 13,107            | 0.7         | 0.3        | 12,973            | 99.0                           | 1.3                     | 8.4               | 0.0         |
| Colorado                           | 2000-2013       | 3,782              | 0.2              | 0.9        | 10.0       | 3,364             | 2.3         | 0.3        | 3,276             | 98.8                           | 1.5                     | 0.0               | 0.0         |
| Connecticut                        | 2000-2014       | 5,589              | 0.2              | 1.2        | 8.2        | 5,052             | 1.1         | 0.1        | 4,990             | 99.4                           | 1.2                     | 2.8               | 0.0         |
| Delaware                           | 2000-2014       | 1,099              | 0.1              | 1.3        | 9.4        | 981               | 2.2         | 0.4        | 955               | 99.4                           | 1.0                     | 0.0               | 0.0         |
| Florida                            | 2000-2013       | 22,754             | 0.0              | 1.2        | 9.3        | 20,353            | 2.9         | 0.3        | 19,713            | 99.2                           | 2.1                     | 0.0               | 0.0         |
| Georgia                            | 2000-2014       | 9,264              | 0.0              | 0.8        | 9.9        | 8,273             | 1.8         | 0.4        | 8,092             | 99.1                           | 1.5                     | 0.0               | 0.0         |
| Atlanta                            | 2000-2014       | 2,958              | 0.0              | 0.5        | 9.3        | 2,669             | 1.3         | 0.4        | 2,622             | 99.4                           | 1.3                     | 0.0               | 0.0         |
| Hawaii                             | 2000-2014       | 2,711              | 0.2              | 1.1        | 8.3        | 2,452             | 1.2         | 0.0        | 2,422             | 98.6                           | 1.6                     | 1.9               | 0.0         |
| Idaho                              | 2000-2014       | 1,275              | 0.3              | 0.2        | 10.6       | 1,133             | 3.1         | 0.4        | 1,093             | 98.4                           | 1.6                     | 0.0               | 0.0         |
| Indiana                            | 2000-2014       | 6,304              | 0.2              | 1.0        | 12.1       | 5,466             | 1.6         | 0.4        | 5,356             | 99.0                           | 1.4                     | 0.0               | 0.0         |
| Iowa                               | 2000-2014       | 3,142              | 0.4              | 0.7        | 11.4       | 2,747             | 1.3         | 0.2        | 2,707             | 99.0                           | 1.4                     | 0.9               | 0.0         |
| Kentucky                           | 2000-2014       | 4,886              | 0.0              | 1.0        | 13.9       | 4,159             | 1.0         | 0.3        | 4,104             | 98.4                           | 1.9                     | 0.7               | 0.0         |
| Louisiana                          | 2000-2014       | 6,122              | 0.1              | 0.9        | 10.8       | 5,396             | 1.2         | 0.4        | 5,309             | 99.0                           | 1.4                     | 1.3               | 0.1         |
| Maine                              | 2000-2013       | 1,488              | 0.0              | 0.3        | 11.6       | 1,311             | 1.3         | 0.5        | 1,288             | 99.0                           | 1.4                     | 0.0               | 0.0         |
| Massachusetts                      | 2000-2009       | 5,942              | 0.0              | 1.1        | 9.2        | 5,333             | 2.1         | 0.2        | 5,207             | 98.4                           | 1.9                     | 0.0               | 0.0         |
| Michigan                           | 2000-2013       | 11,423             | 0.3              | 0.8        | 10.6       | 10,081            | 0.9         | 0.3        | 9,963             | 97.8                           | 3.0                     | 0.0               | 0.0         |

Web-table 2.2: Data quality indicators, patients diagnosed during 2000-2014, by continent, country and registry: STOMACH

|                     | Calendar period | Patients submitted | Ineligible (%) ¶ |            |            | Excluded (%) ¶¶   |            |            | Patients included | Data quality indicators (%) †† |                         |                   |            |
|---------------------|-----------------|--------------------|------------------|------------|------------|-------------------|------------|------------|-------------------|--------------------------------|-------------------------|-------------------|------------|
|                     |                 |                    | Incomplete dates | In situ    | Other      | Eligible patients | DCO        | Other      |                   | MV                             | Non-specific morphology | Lost to follow-up | Censored   |
| Detroit             | 2000-2014       | 5,813              | 0.5              | 0.7        | 9.5        | 5,187             | 1.2        | 0.3        | 5,108             | 99.6                           | 0.7                     | 1.8               | 0.0        |
| Minnesota           | 2000-2013       | 4,726              | 0.0              | 0.8        | 10.4       | 4,196             | 1.8        | 0.4        | 4,101             | 99.9                           | 0.2                     | 0.0               | 0.0        |
| Mississippi         | 2002-2014       | 3,119              | 0.1              | 1.0        | 10.4       | 2,761             | 2.4        | 0.3        | 2,687             | 99.3                           | 1.1                     | 0.0               | 0.0        |
| Missouri            | -               | -                  | -                | -          | -          | -                 | -          | -          | -                 | -                              | -                       | -                 | -          |
| Montana             | 2000-2014       | 1,050              | 0.4              | 1.3        | 11.4       | 912               | 2.5        | 0.7        | 883               | 99.5                           | 0.7                     | 0.0               | 0.0        |
| Nebraska            | 2000-2014       | 1,775              | 0.4              | 1.0        | 12.5       | 1,529             | 0.9        | 0.7        | 1,506             | 98.9                           | 1.4                     | 0.0               | 0.1        |
| New Hampshire       | 2000-2014       | 1,383              | 0.0              | 1.2        | 12.0       | 1,200             | 0.8        | 0.1        | 1,189             | 99.7                           | 0.9                     | 0.0               | 0.0        |
| New Jersey          | 2000-2014       | 13,702             | 0.5              | 1.6        | 9.7        | 12,079            | 1.2        | 0.1        | 11,914            | 99.3                           | 1.1                     | 15.0              | 0.0        |
| New Mexico          | 2000-2014       | 2,425              | 0.0              | 0.9        | 8.7        | 2,190             | 3.3        | 0.1        | 2,114             | 98.1                           | 3.1                     | 2.6               | 0.0        |
| New York            | 2000-2014       | 31,909             | 1.6              | 1.5        | 9.0        | 28,059            | 1.0        | 0.2        | 27,733            | 99.2                           | 1.2                     | 0.0               | 0.0        |
| New York City       | 2000-2014       | 15,692             | 2.2              | 1.5        | 8.5        | 13,782            | 1.0        | 0.2        | 13,626            | 99.4                           | 1.0                     | 0.0               | 0.0        |
| North Carolina      | 2000-2014       | 9,890              | 0.0              | 1.3        | 10.2       | 8,752             | 2.0        | 0.3        | 8,543             | 99.2                           | 1.5                     | 0.0               | 0.0        |
| Ohio                | 2000-2014       | 13,313             | 0.1              | 1.3        | 9.2        | 11,918            | 2.5        | 0.3        | 11,587            | 98.9                           | 1.9                     | 0.0               | 0.0        |
| Oklahoma            | 2000-2010       | 2,623              | 0.4              | 0.5        | 11.0       | 2,312             | 2.1        | 0.3        | 2,257             | 98.6                           | 2.9                     | 0.0               | 0.0        |
| Oregon              | 2000-2013       | 3,547              | 0.0              | 0.7        | 11.8       | 3,103             | 1.1        | 0.3        | 3,060             | 97.6                           | 3.4                     | 0.0               | 0.0        |
| Pennsylvania        | 2000-2014       | 17,926             | 0.5              | 1.3        | 9.5        | 15,904            | 1.6        | 0.3        | 15,615            | 99.2                           | 1.2                     | 0.0               | 0.0        |
| Rhode Island        | 2000-2014       | 1,703              | 0.1              | 1.7        | 9.8        | 1,506             | 0.9        | 0.1        | 1,490             | 98.5                           | 1.8                     | 0.0               | 0.0        |
| South Carolina      | 2000-2014       | 5,496              | 0.0              | 1.1        | 8.1        | 4,988             | 2.2        | 0.5        | 4,854             | 96.6                           | 3.8                     | 0.0               | 0.0        |
| Tennessee           | 2000-2011       | 4,976              | 0.2              | 0.6        | 11.7       | 4,350             | 3.0        | 0.5        | 4,198             | 99.3                           | 1.1                     | 0.0               | 0.0        |
| Texas               | 2000-2013       | 23,067             | 0.7              | 0.9        | 9.8        | 20,425            | 2.9        | 0.3        | 19,767            | 98.4                           | 2.9                     | 0.0               | 0.0        |
| Utah                | 2000-2014       | 1,591              | 0.1              | 1.3        | 12.4       | 1,373             | 0.6        | 0.2        | 1,362             | 98.1                           | 2.3                     | 2.9               | 0.1        |
| Vermont             | 2000-2013       | 556                | 0.0              | 0.7        | 11.9       | 486               | 1.6        | 0.2        | 477               | 97.7                           | 3.1                     | 0.0               | 0.0        |
| Washington          | 2000-2008       | 3,992              | 0.2              | 1.0        | 12.0       | 3,467             | 0.9        | 0.5        | 3,418             | 98.5                           | 1.9                     | 0.0               | 0.0        |
| Seattle             | 2000-2014       | 4,903              | 0.1              | 0.5        | 11.1       | 4,327             | 0.6        | 0.4        | 4,284             | 98.7                           | 1.7                     | 1.6               | 0.0        |
| West Virginia       | 2000-2014       | 2,380              | 0.3              | 1.1        | 10.8       | 2,092             | 0.9        | 0.1        | 2,070             | 98.6                           | 1.6                     | 0.0               | 0.0        |
| Wisconsin           | 2000-2013       | 5,929              | 0.3              | 1.2        | 9.0        | 5,306             | 2.9        | 0.3        | 5,134             | 99.0                           | 1.3                     | 0.0               | 0.0        |
| Wyoming             | 2000-2013       | 429                | 0.0              | 0.9        | 10.0       | 382               | 0.5        | 0.0        | 380               | 99.7                           | 1.1                     | 0.0               | 0.0        |
| <b>ASIA</b>         |                 | <b>1,030,378</b>   | <b>0.6</b>       | <b>0.1</b> | <b>0.8</b> | <b>1,015,353</b>  | <b>4.2</b> | <b>0.1</b> | <b>971,935</b>    | <b>93.5</b>                    | <b>9.7</b>              | <b>0.3</b>        | <b>0.9</b> |
| Chinese registries  | 2003-2013       | 95,183             | 1.2              | 0.1        | 0.2        | 93,733            | 1.2        | 0.0        | 92,578            | 79.8                           | 32.9                    | 2.6               | 0.1        |
| Beijing             | 2003-2013       | 16,413             | 0.1              | 0.0        | 0.0        | 16,402            | 1.2        | 0.0        | 16,203            | 78.7                           | 21.4                    | 6.0               | 0.2        |
| Changle             | 2003-2013       | 4,636              | 5.3              | 0.0        | 0.2        | 4,378             | 0.8        | 0.7        | 4,311             | 63.0                           | 46.6                    | 1.8               | 0.0        |
| Cixian              | 2003-2013       | 3,977              | 0.0              | 1.5        | 0.1        | 3,915             | 2.1        | 0.0        | 3,832             | 86.4                           | 13.7                    | 0.0               | 0.1        |
| Dafeng              | 2003-2013       | 3,358              | 0.0              | 0.0        | 0.0        | 3,357             | 0.1        | 0.0        | 3,355             | 90.2                           | 21.2                    | 0.0               | 0.0        |
| Dalian              | 2003-2013       | 9,095              | 0.0              | 0.0        | 0.0        | 9,092             | 4.9        | 0.0        | 8,642             | 90.7                           | 12.2                    | 0.0               | 0.1        |
| Donghai             | 2003-2013       | 2,520              | 0.3              | 0.0        | 0.1        | 2,509             | 2.8        | 0.0        | 2,440             | 52.6                           | 48.0                    | 4.3               | 0.0        |
| Feicheng            | 2003-2013       | 4,329              | 0.0              | 0.3        | 0.1        | 4,311             | 0.2        | 0.0        | 4,302             | 82.1                           | 19.1                    | 2.5               | 0.0        |
| Ganyu               | 2003-2013       | 2,137              | 0.0              | 0.0        | 0.0        | 2,136             | 0.1        | 0.0        | 2,133             | 40.3                           | 63.2                    | 1.4               | 0.0        |
| Guanyun             | 2004-2013       | 2,002              | 0.0              | 0.0        | 0.0        | 2,002             | 2.3        | 0.0        | 1,955             | 67.5                           | 72.1                    | 1.8               | 0.1        |
| Haimen              | 2003-2013       | 5,056              | 0.0              | 0.0        | 2.0        | 4,957             | 1.2        | 0.0        | 4,896             | 87.2                           | 12.8                    | 0.5               | 0.0        |
| Haining             | 2003-2013       | 1,591              | 0.0              | 0.0        | 0.3        | 1,587             | 0.7        | 0.1        | 1,574             | 87.8                           | 55.4                    | 0.9               | 0.0        |
| Jianhu              | 2003-2013       | 8,169              | 0.0              | 0.0        | 0.0        | 8,168             | 0.0        | 0.0        | 8,168             | 83.6                           | 74.5                    | 5.7               | 0.0        |
| Jiashan             | 2003-2013       | 1,602              | 0.0              | 0.1        | 0.2        | 1,596             | 0.4        | 0.0        | 1,590             | 95.6                           | 4.4                     | 0.9               | 0.0        |
| Jintan              | 2003-2013       | 4,542              | 0.0              | 0.0        | 0.1        | 4,535             | 0.7        | 0.0        | 4,502             | 45.8                           | 54.2                    | 2.3               | 0.0        |
| Lianyungang         | 2008-2013       | 1,333              | 0.0              | 0.0        | 0.4        | 1,328             | 1.1        | 0.0        | 1,314             | 80.7                           | 37.3                    | 13.5              | 0.4        |
| Linzhou             | 2003-2013       | 8,519              | 0.0              | 0.1        | 0.0        | 8,509             | 0.8        | 0.0        | 8,439             | 89.7                           | 10.3                    | 0.0               | 0.0        |
| Qidong              | 2003-2013       | 5,008              | 0.0              | 0.0        | 0.2        | 5,000             | 0.0        | 0.0        | 4,999             | 84.6                           | 15.4                    | 1.0               | 0.0        |
| Sihui               | 2003-2013       | 435                | 3.0              | 0.0        | 0.5        | 420               | 5.2        | 0.0        | 398               | 55.8                           | 63.1                    | 6.8               | 0.5        |
| Taixing             | 2003-2013       | 5,235              | 16.6             | 0.0        | 0.1        | 4,364             | 0.1        | 0.0        | 4,360             | 88.8                           | 41.0                    | 5.0               | 0.0        |
| Yangzhong           | 2003-2013       | 3,774              | 0.0              | 0.0        | 0.1        | 3,772             | 0.1        | 0.0        | 3,770             | 80.3                           | 92.8                    | 0.0               | 0.0        |
| Zhongshan           | 2003-2013       | 1,452              | 0.0              | 0.0        | 3.9        | 1,395             | 0.0        | 0.0        | 1,395             | 87.1                           | 15.1                    | 0.1               | 0.0        |
| Cyprus *            | 2004-2014       | 961                | 1.1              | 0.1        | 8.4        | 868               | 7.6        | 0.0        | 802               | 99.4                           | 1.4                     | 0.0               | 18.1       |
| Hong Kong *         | -               | -                  | -                | -          | -          | -                 | -          | -          | -                 | -                              | -                       | -                 | -          |
| Indian registries   | 2000-2014       | 310                | 0.3              | 0.0        | 0.0        | 309               | 1.9        | 0.0        | 303               | 68.0                           | 36.3                    | 0.3               | 0.0        |
| Guwahati            | -               | -                  | -                | -          | -          | -                 | -          | -          | -                 | -                              | -                       | -                 | -          |
| Karunagappally      | 2000-2014       | 310                | 0.3              | 0.0        | 0.0        | 309               | 1.9        | 0.0        | 303               | 68.0                           | 36.3                    | 0.3               | 0.0        |
| Iran (Golestan)     | 2007-2008       | 446                | 0.0              | 0.0        | 0.7        | 443               | 12.0       | 8.4        | 353               | 82.4                           | 17.6                    | 5.7               | 0.0        |
| Israel *            | 2000-2013       | 12,085             | 0.0              | 1.2        | 14.3       | 10,208            | 4.5        | 0.1        | 9,737             | 97.9                           | 2.4                     | 0.0               | 0.0        |
| Japanese registries | 2000-2014       | 429,212            | 0.7              | 0.0        | 1.0        | 421,551           | 9.4        | 0.1        | 381,457           | 92.8                           | 11.8                    | 0.0               | 1.9        |
| Aichi               | 2003-2013       | 58,236             | 0.2              | 0.0        | 1.4        | 57,331            | 12.2       | 0.0        | 50,356            | 97.5                           | 4.1                     | 0.0               | 1.9        |
| Akita               | 2010-2014       | 9,010              | 1.2              | 0.0        | 1.8        | 8,738             | 0.0        | 2.7        | 8,504             | 94.2                           | 7.6                     | 0.0               | 41.1       |
| Ehime               | 2007-2013       | 11,676             | 0.1              | 0.0        | 2.0        | 11,437            | 14.8       | 0.0        | 9,746             | 97.8                           | 3.4                     | 0.0               | 0.0        |
| Fukui               | 2003-2009       | 6,383              | 0.1              | 0.1        | 1.8        | 6,257             | 2.1        | 0.0        | 6,124             | 95.9                           | 5.8                     | 0.0               | 1.8        |
| Gunma               | 2003-2012       | 16,727             | 14.8             | 0.0        | 0.1        | 14,241            | 25.5       | 0.0        | 10,602            | 95.2                           | 3.0                     | 0.0               | 0.9        |
| Hiroshima           | 2004-2008       | 15,413             | 0.1              | 0.1        | 2.7        | 14,972            | 5.3        | 0.0        | 14,180            | 99.8                           | 0.3                     | 0.0               | 0.3        |
| Hyogo               | 2007-2012       | 30,844             | 0.2              | 0.0        | 1.6        | 30,294            | 23.0       | 0.0        | 23,337            | 97.8                           | 3.9                     | 0.0               | 1.2        |
| Ibaraki             | 2006-2012       | 19,096             | 0.2              | 0.1        | 1.4        | 18,781            | 16.3       | 0.0        | 15,718            | 94.6                           | 14.1                    | 0.0               | 0.9        |
| Kanagawa            | 2000-2013       | 83,118             | 0.0              | 0.1        | 0.2        | 82,887            | 0.0        | 0.1        | 82,844            | 81.9                           | 35.3                    | 0.0               | 0.0        |
| Miyagi              | 2000-2010       | 26,011             | 1.0              | 0.0        | 0.0        | 25,744            | 8.5        | 0.0        | 23,554            | 96.5                           | 3.6                     | 0.0               | 1.2        |
| Niigata             | 2000-2013       | 46,237             | 0.1              | 0.0        | 0.9        | 45,803            | 8.9        | 0.0        | 41,722            | 95.3                           | 0.7                     | 0.0               | 0.0        |
| Osaka               | 2000-2008       | 61,004             | 0.0              | 0.0        | 1.0        | 60,413            | 10.6       | 0.0        | 54,037            | 92.7                           | 10.2                    | 0.0               | 2.7        |
| Saga                | 2006-2013       | 6,354              | 0.2              | 0.0        | 1.5        | 6,242             | 8.6        | 0.0        | 5,705             | 95.3                           | 6.2                     | 0.0               | 0.0        |
| Tochigi             | 2006-2013       | 15,481             | 0.2              | 0.0        | 1.9        | 15,157            | 13.5       | 0.0        | 13,104            | 97.2                           | 4.1                     | 0.0               | 0.8        |
| Yamagata            | 2003-2013       | 19,529             | 0.3              | 0.0        | 1.0        | 19,282            | 4.9        | 0.0        | 18,343            | 96.3                           | 6.0                     | 0.0               | 0.4        |
| Yamanashi           | 2008-2012       | 4,093              | 0.1              | 0.1        | 2.8        | 3,972             | 9.8        | 0.0        | 3,581             | 94.7                           | 7.5                     | 0.0               | 0.2        |
| Jordan *            | 2000-2014       | 2,321              | 0.1              | 0.6        | 14.3       | 1,973             | 0.1        | 0.8        | 1,955             | 99.6                           | 1.9                     | 5.0               | 0.0        |
| Korea * ‡           | 2000-2014       | 397,688            | 0.4              | 0.0        | 0.0        | 396,222           | 0.0        | 0.0        | 396,213           | 96.7                           | 3.8                     | 0.0               | 0.0        |
| Kuwait *            | 2000-2013       | 233                | 0.0              | 0.0        | 6.4        | 218               | 5.0        | 0.0        | 207               | 100.0                          | 0.0                     | 1.0               | 0.0        |
| Malaysia (Penang)   | 2000-2013       | 1,117              | 0.2              | 0.0        | 0.1        | 1,114             | 2.6        | 2.2        | 1,061             | 94.6                           | 8.4                     | 0.0               | 6.8        |
| Mongolia *          | -               | -                  | -                | -          | -          | -                 | -          | -          | -                 | -                              | -                       | -                 | -          |
| Qatar *             | 2000-2014       | 384                | 0.0              | 0.0        | 5.2        | 364               | 0.5        | 0.3        | 361               | 98.6                           | 1.9                     | 0.0               | 50.1       |
| Singapore *         | 2000-2014       | 7,228              | 0.0              | 0.4        | 4.6        | 6,871             | 0.7        | 0.0        | 6,822             | 97.1                           | 1.0                     | 0.0               | 0.0        |
| Taiwan *            | 2000-2014       | 55,467             | 0.0              | 0.8        | 0.1        | 54,984            | 0.0        | 0.0        | 54,983            | 97.6                           | 0.2                     | 0.0               | 0.0        |

Web-table 2.2: Data quality indicators, patients diagnosed during 2000-2014, by continent, country and registry: STOMACH

|                                | Calendar period | Patients submitted | Ineligible (%) ¶ |            |            | Excluded (%) ¶¶   |            |            | Patients included | Data quality indicators (%) †† |                         |                   |            |
|--------------------------------|-----------------|--------------------|------------------|------------|------------|-------------------|------------|------------|-------------------|--------------------------------|-------------------------|-------------------|------------|
|                                |                 |                    | Incomplete dates | In situ    | Other      | Eligible patients | DCO        | Other      |                   | MV                             | Non-specific morphology | Lost to follow-up | Censored   |
| Thai registries                | 2000-2014       | 6,320              | 0.0              | 0.0        | 1.6        | 6,214             | 3.4        | 11.0       | 5,321             | 75.2                           | 25.1                    | 0.0               | 7.4        |
| Bangkok                        | 2000-2012       | 3,198              | 0.0              | 0.1        | 0.9        | 3,166             | 3.9        | 21.6       | 2,358             | 80.7                           | 19.4                    | 0.0               | 0.0        |
| Khon Kaen                      | 2000-2014       | 739                | 0.0              | 0.0        | 0.4        | 736               | 1.4        | 0.0        | 726               | 82.5                           | 18.7                    | 0.0               | 6.5        |
| Lampang                        | 2000-2014       | 697                | 0.0              | 0.0        | 0.0        | 697               | 4.6        | 0.0        | 665               | 85.9                           | 14.1                    | 0.0               | 0.0        |
| Lamphun                        | 2000-2014       | 359                | 0.0              | 0.0        | 0.0        | 359               | 0.0        | 0.0        | 359               | 64.9                           | 35.1                    | 0.0               | 0.0        |
| Lopburi                        | 2000-2014       | 879                | 0.0              | 0.0        | 3.9        | 845               | 3.8        | 0.0        | 813               | 40.2                           | 59.8                    | 0.0               | 41.6       |
| Songkhla                       | 2000-2014       | 448                | 0.0              | 0.0        | 8.3        | 411               | 2.7        | 0.0        | 400               | 92.5                           | 9.0                     | 0.3               | 2.8        |
| Turkish registries             | 2000-2013       | 21,423             | 1.3              | 0.3        | 3.7        | 20,281            | 2.4        | 0.1        | 19,782            | 96.0                           | 6.9                     | 0.1               | 3.7        |
| Ankara                         | 2008-2012       | 6,467              | 0.0              | 0.2        | 4.0        | 6,191             | 0.9        | 0.0        | 6,135             | 99.6                           | 3.5                     | 0.0               | 1.1        |
| Antalya                        | 2006-2012       | 793                | 0.0              | 0.1        | 0.1        | 791               | 0.0        | 0.1        | 790               | 98.0                           | 3.0                     | 0.0               | 1.4        |
| Bursa                          | 2006-2012       | 2,583              | 4.0              | 0.0        | 3.4        | 2,393             | 4.2        | 0.1        | 2,289             | 92.8                           | 10.0                    | 0.0               | 0.0        |
| Edirne                         | 2006-2012       | 463                | 3.9              | 0.0        | 2.8        | 432               | 7.6        | 0.0        | 399               | 93.7                           | 7.3                     | 0.0               | 0.0        |
| Erzurum                        | 2006-2012       | 1,393              | 0.6              | 0.0        | 1.3        | 1,366             | 1.5        | 0.2        | 1,343             | 90.6                           | 13.0                    | 0.0               | 1.6        |
| Eskisehir                      | 2006-2012       | 703                | 0.0              | 0.0        | 0.0        | 703               | 1.7        | 0.1        | 690               | 95.4                           | 0.0                     | 1.3               | 0.0        |
| Izmir                          | 2000-2013       | 6,384              | 2.3              | 0.5        | 5.4        | 5,860             | 3.7        | 0.1        | 5,642             | 95.6                           | 7.4                     | 0.0               | 11.0       |
| Samsun                         | 2006-2012       | 1,431              | 0.0              | 0.2        | 3.4        | 1,380             | 2.9        | 0.1        | 1,339             | 92.6                           | 11.7                    | 1.2               | 0.1        |
| Trabzon                        | 2006-2012       | 1,206              | 0.2              | 0.7        | 2.5        | 1,165             | 0.9        | 0.0        | 1,155             | 95.2                           | 10.0                    | 0.0               | 0.5        |
| <b>EUROPE</b>                  |                 | <b>723,241</b>     | <b>0.1</b>       | <b>0.5</b> | <b>2.5</b> | <b>700,317</b>    | <b>4.4</b> | <b>0.2</b> | <b>668,096</b>    | <b>93.9</b>                    | <b>2.6</b>              | <b>0.4</b>        | <b>1.2</b> |
| Austria *                      | 2000-2014       | 22,335             | 0.0              | 0.7        | 4.3        | 21,211            | 8.2        | 0.8        | 19,308            | 98.6                           | 3.7                     | 0.0               | 0.0        |
| Belarus (Childhood) †          | -               | -                  | -                | -          | -          | -                 | -          | -          | -                 | -                              | -                       | -                 | -          |
| Belgium *                      | 2004-2014       | 15,737             | 0.0              | 3.0        | 0.1        | 15,247            | 0.0        | 0.2        | 15,222            | 99.5                           | 0.7                     | 1.0               | 0.0        |
| Bulgaria *                     | 2000-2014       | 25,813             | 0.0              | 0.0        | 0.0        | 25,811            | 17.1       | 0.0        | 21,404            | 81.5                           | 0.4                     | 0.0               | 0.0        |
| Croatia *                      | 2000-2014       | 16,008             | 0.0              | 0.1        | 0.0        | 15,994            | 8.7        | 0.1        | 14,589            | 81.8                           | 0.3                     | 0.0               | 0.0        |
| Czech Republic *               | 2000-2014       | 25,479             | 0.0              | 0.7        | 1.8        | 24,846            | 2.2        | 0.6        | 24,157            | 91.9                           | 0.7                     | 0.0               | 0.0        |
| Denmark *                      | 2000-2014       | 8,139              | 0.0              | 0.0        | 1.4        | 8,022             | 0.0        | 0.0        | 8,022             | 98.0                           | 3.5                     | 0.1               | 0.0        |
| Estonia *                      | 2000-2012       | 5,553              | 0.0              | 0.3        | 2.0        | 5,430             | 3.7        | 0.3        | 5,212             | 93.3                           | 0.7                     | 0.1               | 0.0        |
| Finland *                      | 2000-2014       | 11,042             | 0.3              | 0.0        | 6.9        | 10,245            | 3.7        | 0.0        | 9,871             | 97.0                           | 1.1                     | 0.0               | 0.0        |
| French registries              | 2000-2010       | 13,894             | 0.1              | 0.0        | 0.1        | 13,871            | 0.0        | 0.7        | 13,770            | 97.8                           | 0.4                     | 1.5               | 0.0        |
| Bas-Rhin                       | 2000-2010       | 1,259              | 0.0              | 0.0        | 0.2        | 1,256             | 0.0        | 0.4        | 1,251             | 99.0                           | 0.0                     | 1.1               | 0.0        |
| Basse Normandie                | -               | -                  | -                | -          | -          | -                 | -          | -          | -                 | -                              | -                       | -                 | -          |
| Burgundy Digestive             | 2000-2010       | 1,587              | 0.0              | 0.0        | 0.1        | 1,586             | 0.0        | 0.1        | 1,585             | 97.1                           | 0.5                     | 1.1               | 0.0        |
| Calvados                       | -               | -                  | -                | -          | -          | -                 | -          | -          | -                 | -                              | -                       | -                 | -          |
| Calvados Digestive             | 2000-2010       | 843                | 0.0              | 0.0        | 0.1        | 842               | 0.0        | 0.0        | 842               | 94.3                           | 1.0                     | 1.2               | 0.0        |
| Côte-d'Or Gynaecologic         | -               | -                  | -                | -          | -          | -                 | -          | -          | -                 | -                              | -                       | -                 | -          |
| Côte-d'Or Haematopoietic       | -               | -                  | -                | -          | -          | -                 | -          | -          | -                 | -                              | -                       | -                 | -          |
| Doubs                          | 2000-2010       | 611                | 0.0              | 0.0        | 0.0        | 611               | 0.0        | 0.5        | 608               | 98.8                           | 0.3                     | 0.8               | 0.0        |
| Finistère                      | 2005-2010       | 848                | 0.0              | 0.0        | 0.0        | 848               | 0.0        | 1.7        | 834               | 98.3                           | 0.4                     | 1.1               | 0.0        |
| Gironde CNS                    | -               | -                  | -                | -          | -          | -                 | -          | -          | -                 | -                              | -                       | -                 | -          |
| Gironde General                | 2005-2010       | 564                | 1.1              | 0.0        | 0.4        | 556               | 0.0        | 0.0        | 556               | 97.1                           | 0.2                     | 2.7               | 0.0        |
| Gironde Haematopoietic         | -               | -                  | -                | -          | -          | -                 | -          | -          | -                 | -                              | -                       | -                 | -          |
| Haut-Rhin                      | 2000-2010       | 979                | 0.0              | 0.0        | 0.2        | 977               | 0.0        | 1.1        | 966               | 98.8                           | 0.1                     | 2.3               | 0.0        |
| Haute-Vienne                   | 2009-2009       | 49                 | 0.0              | 0.0        | 0.0        | 49                | 0.0        | 0.0        | 49                | 98.0                           | 0.0                     | 0.0               | 0.0        |
| Hérault                        | 2000-2010       | 1,159              | 0.0              | 0.0        | 0.2        | 1,157             | 0.0        | 0.4        | 1,152             | 97.1                           | 0.1                     | 1.0               | 0.0        |
| Isère                          | 2000-2010       | 1,386              | 0.0              | 0.0        | 0.0        | 1,386             | 0.0        | 1.1        | 1,371             | 97.0                           | 0.4                     | 0.5               | 0.0        |
| Lille Metro                    | 2008-2010       | 188                | 0.0              | 0.0        | 0.0        | 188               | 0.0        | 0.0        | 188               | 97.3                           | 0.0                     | 1.6               | 0.0        |
| Loire-Atlantique               | 2000-2010       | 2,184              | 0.2              | 0.0        | 0.1        | 2,178             | 0.0        | 1.9        | 2,136             | 98.5                           | 0.6                     | 2.8               | 0.0        |
| Manche                         | 2000-2010       | 1,033              | 0.0              | 0.0        | 0.0        | 1,033             | 0.0        | 0.1        | 1,032             | 98.8                           | 0.0                     | 1.5               | 0.0        |
| Somme                          | 2000-2010       | 712                | 0.0              | 0.0        | 0.0        | 712               | 0.0        | 0.6        | 708               | 98.2                           | 1.0                     | 2.3               | 0.0        |
| Tarn                           | 2000-2010       | 492                | 0.0              | 0.0        | 0.0        | 492               | 0.0        | 0.0        | 492               | 97.6                           | 0.4                     | 1.0               | 0.0        |
| France Childhood Haem †        | -               | -                  | -                | -          | -          | -                 | -          | -          | -                 | -                              | -                       | -                 | -          |
| France Childhood Solid †       | -               | -                  | -                | -          | -          | -                 | -          | -          | -                 | -                              | -                       | -                 | -          |
| German registries              | 2000-2014       | 90,789             | 0.4              | 0.4        | 3.7        | 86,707            | 13.0       | 0.1        | 75,378            | 97.8                           | 0.5                     | 0.2               | 9.6        |
| Brandenburg                    | 2000-2014       | 8,979              | 0.0              | 0.7        | 2.1        | 8,729             | 14.3       | 0.1        | 7,470             | 97.6                           | 0.3                     | 0.0               | 10.9       |
| Bremen                         | 2000-2013       | 2,109              | 0.0              | 1.1        | 7.4        | 1,928             | 7.0        | 0.0        | 1,793             | 97.8                           | 0.2                     | 2.8               | 0.0        |
| Hamburg                        | 2000-2013       | 4,301              | 0.0              | 0.0        | 0.5        | 4,278             | 12.8       | 0.0        | 3,729             | 99.0                           | 1.1                     | 2.3               | 0.0        |
| Lower Saxony                   | 2003-2013       | 19,826             | 1.9              | 0.0        | 4.7        | 18,518            | 10.9       | 0.0        | 16,499            | 99.8                           | 0.3                     | 0.0               | 13.4       |
| Mecklenburg-W. Pomerania       | 2000-2014       | 6,699              | 0.0              | 0.4        | 2.3        | 6,519             | 10.9       | 0.1        | 5,802             | 97.2                           | 0.4                     | 0.0               | 11.5       |
| Rhineland Palatinate           | 2000-2013       | 11,610             | 0.0              | 0.4        | 6.1        | 10,853            | 17.0       | 0.2        | 8,988             | 93.4                           | 0.1                     | 0.0               | 13.8       |
| Saarland                       | 2000-2012       | 2,799              | 0.0              | 0.4        | 0.0        | 2,787             | 5.0        | 0.3        | 2,641             | 99.1                           | 1.3                     | 0.0               | 0.0        |
| Saxony                         | 2000-2014       | 17,455             | 0.0              | 0.6        | 2.5        | 16,910            | 10.7       | 0.1        | 15,077            | 97.2                           | 1.1                     | 0.0               | 9.8        |
| Schleswig-Holstein             | 2000-2012       | 8,680              | 0.0              | 0.4        | 6.9        | 8,047             | 15.2       | 0.0        | 6,818             | 99.5                           | 0.6                     | 0.0               | 0.0        |
| Thuringia                      | 2000-2014       | 8,331              | 0.0              | 0.5        | 1.8        | 8,138             | 19.3       | 0.1        | 6,561             | 97.7                           | 0.3                     | 0.0               | 12.9       |
| Gibraltar *                    | 2000-2008       | 35                 | 11.4             | 2.9        | 2.9        | 29                | 0.0        | 0.0        | 29                | 100.0                          | 3.4                     | 0.0               | 17.2       |
| Greece (National Paediatric) † | -               | -                  | -                | -          | -          | -                 | -          | -          | -                 | -                              | -                       | -                 | -          |
| Iceland *                      | 2000-2014       | 526                | 0.0              | 0.0        | 9.3        | 477               | 0.8        | 0.0        | 473               | 97.9                           | 2.1                     | 0.0               | 0.0        |
| Ireland *                      | 2000-2013       | 7,230              | 0.0              | 1.2        | 2.6        | 6,961             | 2.2        | 0.1        | 6,801             | 96.1                           | 0.9                     | 0.0               | 0.0        |
| Italian registries             | 2000-2014       | 82,120             | 0.0              | 0.2        | 0.6        | 81,423            | 0.9        | 0.0        | 80,686            | 91.2                           | 9.5                     | 0.5               | 0.5        |
| Alto Adige                     | 2000-2010       | 1,469              | 0.0              | 0.0        | 0.1        | 1,467             | 1.3        | 0.0        | 1,448             | 97.2                           | 3.0                     | 0.0               | 0.0        |
| Barletta-Andria-Trani          | 2006-2012       | 446                | 0.0              | 0.0        | 0.0        | 446               | 2.0        | 0.0        | 437               | 93.1                           | 7.1                     | 0.7               | 0.0        |
| Basilicata                     | 2006-2010       | 706                | 0.0              | 0.0        | 0.0        | 706               | 0.0        | 0.0        | 706               | 87.0                           | 14.0                    | 0.0               | 0.3        |
| Bergamo                        | 2007-2012       | 2,047              | 0.0              | 0.0        | 0.0        | 2,047             | 0.0        | 0.0        | 2,046             | 93.0                           | 7.5                     | 0.3               | 0.0        |
| Biella-Vercelli                | 2000-2010       | 720                | 0.0              | 1.1        | 3.5        | 687               | 2.0        | 0.1        | 672               | 95.4                           | 4.8                     | 0.3               | 1.5        |
| Brescia                        | 2000-2008       | 3,216              | 0.0              | 0.0        | 0.1        | 3,214             | 0.0        | 0.0        | 3,213             | 86.6                           | 14.3                    | 0.5               | 0.1        |
| Brindisi                       | 2006-2008       | 186                | 0.0              | 0.0        | 0.0        | 186               | 0.0        | 0.0        | 186               | 87.1                           | 12.9                    | 1.1               | 0.0        |
| Caserta                        | 2008-2010       | 490                | 0.0              | 0.0        | 0.0        | 490               | 0.0        | 0.0        | 490               | 91.0                           | 9.2                     | 0.4               | 3.3        |
| Catania-Messina-Enna           | 2003-2012       | 3,430              | 0.0              | 0.0        | 0.0        | 3,430             | 3.7        | 0.0        | 3,302             | 92.3                           | 10.3                    | 0.0               | 2.1        |
| Catanzaro                      | 2003-2009       | 523                | 0.0              | 0.0        | 0.0        | 523               | 0.0        | 0.0        | 523               | 89.3                           | 11.5                    | 0.0               | 0.2        |
| Como                           | 2003-2011       | 1,486              | 0.0              | 0.0        | 0.1        | 1,485             | 0.0        | 0.0        | 1,485             | 95.1                           | 5.2                     | 0.4               | 0.0        |
| Cremona                        | 2005-2010       | 958                | 0.0              | 0.0        | 0.1        | 957               | 0.6        | 0.0        | 951               | 90.0                           | 10.7                    | 0.5               | 0.0        |
| Ferrara                        | 2000-2011       | 1,246              | 0.0              | 0.0        | 0.2        | 1,244             | 0.5        | 0.0        | 1,238             | 88.0                           | 12.3                    | 0.8               | 0.0        |
| Friuli-Venezia-Giulia          | 2000-2010       | 4,537              | 0.0              | 0.0        | 0.2        | 4,530             | 2.6        | 0.0        | 4,412             | 94.6                           | 5.9                     | 0.3               | 0.0        |
| Genoa                          | 2000-2009       | 2,411              | 0.0              | 1.3        | 2.9        | 2,308             | 0.1        | 0.0        | 2,306             | 90.2                           | 10.0                    | 0.1               | 0.0        |
| Latina                         | 2000-2011       | 1,297              | 0.0              | 0.0        | 0.0        | 1,297             | 0.1        | 0.2        | 1,294             | 84.9                           | 15.6                    | 1.2               | 0.7        |
| Lecce                          | 2003-2008       | 837                | 0.0              | 0.0        | 0.2        | 835               | 0.0        | 0.0        | 835               | 88.7                           | 11.9                    | 0.1               | 1.0        |

Web-table 2.2: Data quality indicators, patients diagnosed during 2000-2014, by continent, country and registry: STOMACH

|                      | Calendar period | Patients submitted | Ineligible (%) ¶ |         |       | Excluded (%) ¶¶   |      |       | Patients included | Data quality indicators (%) †† |                         |                   |          |
|----------------------|-----------------|--------------------|------------------|---------|-------|-------------------|------|-------|-------------------|--------------------------------|-------------------------|-------------------|----------|
|                      |                 |                    | Incomplete dates | In situ | Other | Eligible patients | DCO  | Other |                   | MV                             | Non-specific morphology | Lost to follow-up | Censored |
| Mantova              | 2000-2010       | 1,399              | 0.0              | 0.0     | 0.1   | 1,398             | 2.3  | 0.1   | 1,365             | 91.1                           | 9.3                     | 0.0               | 0.1      |
| Milano               | 2000-2012       | 5,863              | 0.0              | 0.0     | 0.1   | 5,858             | 0.1  | 0.0   | 5,851             | 89.4                           | 11.1                    | 1.8               | 0.8      |
| Modena               | 2000-2012       | 2,506              | 0.0              | 1.4     | 0.4   | 2,461             | 0.0  | 0.0   | 2,459             | 93.9                           | 6.3                     | 0.0               | 0.7      |
| Monza-Brianza        | 2007-2012       | 1,394              | 0.0              | 0.0     | 0.0   | 1,394             | 0.0  | 0.1   | 1,393             | 91.5                           | 9.5                     | 0.8               | 0.0      |
| Naples               | 2000-2012       | 1,653              | 0.0              | 0.0     | 0.1   | 1,652             | 0.0  | 0.0   | 1,652             | 90.5                           | 9.6                     | 1.0               | 1.1      |
| Nuoro                | 2003-2012       | 440                | 0.0              | 0.0     | 0.2   | 439               | 1.6  | 0.0   | 432               | 92.6                           | 7.9                     | 0.0               | 0.0      |
| Palermo              | 2003-2012       | 1,710              | 0.0              | 0.0     | 0.1   | 1,709             | 4.0  | 0.0   | 1,640             | 87.8                           | 13.0                    | 0.1               | 0.0      |
| Parma                | 2000-2014       | 2,510              | 0.0              | 0.2     | 1.1   | 2,477             | 0.5  | 0.0   | 2,464             | 90.1                           | 10.0                    | 0.9               | 0.1      |
| Pavia                | 2003-2009       | 1,166              | 0.0              | 0.0     | 0.2   | 1,164             | 0.1  | 0.0   | 1,163             | 86.0                           | 14.4                    | 0.5               | 0.5      |
| Piacenza             | 2006-2011       | 660                | 0.0              | 0.0     | 0.0   | 660               | 0.0  | 0.0   | 660               | 93.0                           | 7.3                     | 0.0               | 1.8      |
| Ragusa               | 2000-2012       | 891                | 0.0              | 0.7     | 3.3   | 856               | 4.0  | 0.0   | 822               | 90.8                           | 11.6                    | 0.2               | 0.0      |
| Reggio Emilia        | 2000-2012       | 1,989              | 0.0              | 0.0     | 0.2   | 1,986             | 0.0  | 0.0   | 1,986             | 92.0                           | 8.4                     | 0.5               | 0.0      |
| Romagna              | 2000-2012       | 6,592              | 0.0              | 0.9     | 0.1   | 6,530             | 0.1  | 0.0   | 6,522             | 92.6                           | 7.6                     | 0.1               | 0.0      |
| Salerno              | 2000-2009       | 1,722              | 0.0              | 0.0     | 0.1   | 1,720             | 0.0  | 0.0   | 1,720             | 84.7                           | 15.9                    | 0.4               | 3.0      |
| Sassari              | 2000-2011       | 784                | 0.0              | 0.0     | 0.3   | 782               | 2.8  | 0.0   | 760               | 93.8                           | 7.5                     | 0.0               | 0.0      |
| Siracusa             | 2000-2012       | 734                | 0.0              | 0.0     | 0.0   | 734               | 3.5  | 0.0   | 708               | 90.1                           | 11.4                    | 0.0               | 0.4      |
| Sondrio              | 2000-2011       | 698                | 0.0              | 0.0     | 0.3   | 696               | 0.0  | 0.0   | 696               | 93.4                           | 7.3                     | 0.6               | 0.0      |
| Taranto              | 2006-2012       | 697                | 0.0              | 0.0     | 0.0   | 697               | 1.6  | 0.0   | 686               | 96.9                           | 3.8                     | 0.4               | 0.0      |
| Trapani              | 2002-2010       | 546                | 0.0              | 0.0     | 0.0   | 546               | 1.6  | 0.2   | 536               | 84.7                           | 18.8                    | 0.4               | 0.0      |
| Trento               | 2000-2010       | 1,322              | 0.0              | 0.0     | 0.2   | 1,319             | 1.4  | 0.0   | 1,300             | 94.5                           | 10.5                    | 0.4               | 0.0      |
| Turin                | 2000-2012       | 2,685              | 0.0              | 0.0     | 8.1   | 2,467             | 1.5  | 0.0   | 2,429             | 95.0                           | 5.4                     | 1.0               | 0.0      |
| Tuscany              | 2000-2009       | 4,653              | 0.0              | 0.6     | 1.8   | 4,543             | 1.4  | 0.2   | 4,473             | 87.1                           | 13.8                    | 0.0               | 1.0      |
| Umbria               | 2000-2013       | 4,958              | 0.0              | 0.0     | 0.0   | 4,956             | 0.2  | 0.0   | 4,944             | 93.5                           | 6.8                     | 0.2               | 0.1      |
| Varese               | 2000-2012       | 3,021              | 0.0              | 0.0     | 0.3   | 3,011             | 0.3  | 0.0   | 3,003             | 92.2                           | 8.0                     | 0.6               | 0.0      |
| Veneto               | 2000-2009       | 5,009              | 0.0              | 0.0     | 0.1   | 5,003             | 0.5  | 0.0   | 4,980             | 91.6                           | 8.8                     | 0.6               | 0.7      |
| Viterbo              | 2006-2010       | 513                | 0.0              | 0.0     | 0.0   | 513               | 2.9  | 0.0   | 498               | 90.6                           | 10.4                    | 0.0               | 14.5     |
| Piedmont Childhood   | -               | -                  | -                | -       | -     | -                 | -    | -     | -                 | -                              | -                       | -                 | -        |
| Latvia *             | 2000-2014       | 9,416              | 0.0              | 0.0     | 26.8  | 6,896             | 0.0  | 0.3   | 6,878             | 100.0                          | 0.5                     | 0.0               | 0.0      |
| Lithuania *          | 2000-2012       | 13,008             | 0.0              | 0.0     | 2.6   | 12,671            | 6.6  | 0.0   | 11,840            | 85.4                           | 0.6                     | 0.0               | 0.3      |
| Malta *              | 2000-2013       | 734                | 0.0              | 0.0     | 6.7   | 685               | 3.9  | 0.3   | 656               | 94.7                           | 6.1                     | 0.0               | 0.0      |
| Netherlands *        | 2000-2014       | 30,734             | 0.0              | 0.6     | 2.2   | 29,872            | 0.4  | 0.6   | 29,585            | 98.2                           | 1.9                     | 0.4               | 0.0      |
| Norway *             | 2000-2014       | 9,551              | 0.0              | 0.7     | 19.9  | 7,585             | 0.4  | 0.1   | 7,548             | 100.0                          | 0.2                     | 0.1               | 0.0      |
| Poland *             | 2000-2014       | 83,799             | 0.0              | 0.0     | 0.1   | 83,714            | 4.8  | 0.3   | 79,466            | 88.4                           | 0.7                     | 0.0               | 0.0      |
| Greater Poland       | 2000-2014       | 7,605              | 0.0              | 0.0     | 0.0   | 7,605             | 9.8  | 0.2   | 6,851             | 91.3                           | 0.9                     | 0.0               | 0.0      |
| Holy Cross           | 2000-2014       | 3,282              | 0.0              | 0.0     | 0.0   | 3,282             | 3.6  | 0.2   | 3,159             | 92.7                           | 1.6                     | 0.0               | 0.0      |
| Kujavia-Pomerania    | 2000-2014       | 4,432              | 0.0              | 0.0     | 0.0   | 4,430             | 1.7  | 0.3   | 4,342             | 95.4                           | 0.1                     | 0.0               | 0.0      |
| Lesser Poland        | 2000-2014       | 7,985              | 0.0              | 0.0     | 0.0   | 7,983             | 6.5  | 0.1   | 7,456             | 91.8                           | 1.5                     | 0.0               | 0.0      |
| Łódź                 | 2000-2014       | 5,524              | 0.0              | 0.0     | 0.0   | 5,523             | 1.3  | 1.4   | 5,375             | 79.6                           | 0.3                     | 0.0               | 0.0      |
| Lower Silesia        | 2000-2014       | 6,901              | 0.0              | 0.0     | 0.0   | 6,901             | 0.8  | 0.0   | 6,845             | 81.1                           | 0.5                     | 0.1               | 0.0      |
| Lublin               | 2000-2014       | 4,316              | 0.0              | 0.0     | 0.0   | 4,316             | 10.5 | 0.2   | 3,854             | 82.1                           | 0.2                     | 0.0               | 0.0      |
| Lubush               | 2000-2014       | 2,187              | 0.0              | 0.0     | 0.1   | 2,185             | 3.8  | 0.2   | 2,099             | 87.6                           | 0.3                     | 0.0               | 0.0      |
| Mazovia              | 2000-2014       | 8,243              | 0.0              | 0.0     | 0.0   | 8,242             | 0.0  | 0.0   | 8,239             | 88.5                           | 0.2                     | 0.0               | 0.0      |
| Opole                | 2000-2014       | 2,367              | 0.0              | 0.0     | 0.0   | 2,367             | 0.2  | 0.3   | 2,355             | 95.8                           | 0.3                     | 0.0               | 0.0      |
| Podlaha              | 2000-2014       | 2,687              | 0.0              | 0.0     | 0.0   | 2,687             | 10.5 | 0.0   | 2,404             | 81.6                           | 0.8                     | 0.0               | 0.0      |
| Pomerania            | 2000-2014       | 5,311              | 0.0              | 0.0     | 0.0   | 5,311             | 15.0 | 0.1   | 4,510             | 93.9                           | 0.1                     | 0.0               | 0.0      |
| Silesia              | 2000-2014       | 11,670             | 0.0              | 0.0     | 0.6   | 11,597            | 1.8  | 0.2   | 11,373            | 87.5                           | 1.2                     | 0.0               | 0.0      |
| Subcarpathia         | 2000-2014       | 5,044              | 0.0              | 0.0     | 0.0   | 5,042             | 3.8  | 0.7   | 4,817             | 94.9                           | 0.4                     | 0.0               | 0.0      |
| Varmia-Mazuria       | 2000-2014       | 2,955              | 0.0              | 0.0     | 0.0   | 2,955             | 0.8  | 0.2   | 2,925             | 94.3                           | 1.0                     | 0.0               | 0.1      |
| West Pomerania       | 2000-2014       | 3,290              | 0.0              | 0.0     | 0.1   | 3,288             | 12.8 | 0.1   | 2,862             | 78.1                           | 0.1                     | 0.0               | 0.0      |
| Portugal *           | 2000-2014       | 36,434             | 1.4              | 0.3     | 5.2   | 33,914            | 0.1  | 0.0   | 33,865            | 97.6                           | 2.0                     | 1.0               | 0.0      |
| Azores               | 2000-2014       | 758                | 0.0              | 0.0     | 0.1   | 757               | 5.4  | 0.0   | 716               | 96.1                           | 4.2                     | 0.1               | 0.4      |
| Portugal Central     | 2003-2010       | 4,041              | 0.4              | 0.0     | 0.0   | 4,022             | 0.0  | 0.0   | 4,022             | 98.4                           | 2.4                     | 0.8               | 0.0      |
| Portugal North       | 2000-2010       | 13,453             | 3.6              | 0.0     | 3.2   | 12,541            | 0.0  | 0.0   | 12,541            | 98.6                           | 2.3                     | 0.0               | 0.0      |
| Portugal South       | 2000-2014       | 18,182             | 0.0              | 0.7     | 8.0   | 16,594            | 0.0  | 0.0   | 16,586            | 96.8                           | 1.5                     | 1.8               | 0.0      |
| Romania (Cluj)       | 2006-2012       | 1,672              | 0.0              | 0.2     | 3.5   | 1,609             | 25.4 | 0.0   | 1,201             | 87.9                           | 12.7                    | 0.0               | 0.0      |
| Russian registries ‡ | 2000-2014       | 32,113             | 0.0              | 0.1     | 0.1   | 32,048            | 0.7  | 0.3   | 31,711            | 89.2                           | 2.7                     | 1.4               | 0.6      |
| Arkhangelsk          | 2000-2014       | 7,639              | 0.0              | 0.3     | 0.0   | 7,616             | 0.9  | 0.5   | 7,508             | 87.5                           | 3.7                     | 0.8               | 0.0      |
| Karelia              | 2000-2014       | 3,820              | 0.0              | 0.0     | 0.6   | 3,796             | 1.8  | 0.5   | 3,708             | 79.6                           | 4.0                     | 0.6               | 1.9      |
| Omsk                 | 2000-2014       | 4,605              | 0.0              | 0.0     | 0.0   | 4,605             | 0.0  | 0.2   | 4,598             | 98.3                           | 5.8                     | 3.4               | 2.4      |
| Samara               | 2000-2014       | 13,389             | 0.0              | 0.0     | 0.0   | 13,388            | 0.7  | 0.1   | 13,280            | 90.7                           | 1.3                     | 1.2               | 0.0      |
| Tomsk                | 2005-2014       | 2,660              | 0.0              | 0.3     | 0.3   | 2,643             | 0.0  | 1.0   | 2,617             | 84.9                           | 0.0                     | 1.8               | 0.7      |
| Slovakia *           | 2000-2010       | 11,179             | 0.0              | 0.7     | 3.9   | 10,667            | 10.0 | 0.0   | 9,604             | 95.8                           | 4.4                     | 0.0               | 0.0      |
| Slovenia *           | 2000-2013       | 7,067              | 0.0              | 0.0     | 5.8   | 6,654             | 3.2  | 0.0   | 6,443             | 96.1                           | 0.2                     | 0.0               | 0.0      |
| Spanish registries   | 2000-2013       | 19,643             | 0.2              | 0.6     | 6.1   | 18,299            | 2.4  | 0.1   | 17,844            | 94.6                           | 1.6                     | 0.4               | 0.0      |
| Basque Country       | 2000-2013       | 7,650              | 0.0              | 0.0     | 5.5   | 7,229             | 1.6  | 0.2   | 7,098             | 94.3                           | 0.4                     | 0.2               | 0.0      |
| Canaries             | 2000-2011       | 2,231              | 0.0              | 1.7     | 10.7  | 1,955             | 2.2  | 0.1   | 1,911             | 96.3                           | 0.6                     | 0.1               | 0.0      |
| Girona               | 2000-2013       | 1,948              | 0.8              | 2.8     | 9.2   | 1,699             | 3.9  | 0.1   | 1,632             | 94.4                           | 6.7                     | 1.2               | 0.0      |
| Granada              | 2000-2012       | 1,743              | 0.0              | 0.0     | 5.7   | 1,644             | 3.8  | 0.0   | 1,582             | 92.3                           | 0.0                     | 0.7               | 0.0      |
| Mallorca             | 2000-2012       | 1,310              | 0.8              | 1.3     | 9.8   | 1,154             | 2.4  | 0.1   | 1,125             | 96.9                           | 0.5                     | 1.3               | 0.0      |
| Murcia               | 2000-2010       | 2,091              | 0.0              | 0.0     | 5.1   | 1,985             | 2.2  | 0.2   | 1,938             | 94.3                           | 6.1                     | 0.0               | 0.0      |
| Navarra              | 2000-2010       | 1,434              | 0.0              | 0.0     | 0.1   | 1,433             | 1.9  | 0.0   | 1,406             | 94.8                           | 0.4                     | 0.1               | 0.0      |
| Tarragona            | 2000-2011       | 1,236              | 0.3              | 0.4     | 2.2   | 1,200             | 4.0  | 0.0   | 1,152             | 95.9                           | 0.3                     | 0.0               | 0.0      |
| Spain Childhood      | -               | -                  | -                | -       | -     | -                 | -    | -     | -                 | -                              | -                       | -                 | -        |
| Valencia Childhood   | -               | -                  | -                | -       | -     | -                 | -    | -     | -                 | -                              | -                       | -                 | -        |
| Sweden *             | 2000-2014       | 14,630             | 0.0              | 3.1     | 3.0   | 13,737            | 1.9  | 0.1   | 13,463            | 99.4                           | 1.0                     | 0.1               | 0.0      |
| Swiss registries     | 2000-2014       | 6,856              | 0.0              | 0.4     | 8.2   | 6,265             | 1.4  | 0.6   | 6,135             | 97.8                           | 1.0                     | 2.7               | 1.8      |
| Basel                | 2000-2011       | 397                | 0.0              | 0.0     | 0.5   | 395               | 0.5  | 8.4   | 360               | 100.0                          | 0.0                     | 0.0               | 7.5      |
| Fribourg             | 2006-2014       | 280                | 0.0              | 0.7     | 6.4   | 260               | 0.0  | 2.7   | 253               | 98.4                           | 1.6                     | 2.0               | 0.0      |
| Geneva               | 2000-2013       | 672                | 0.0              | 0.9     | 11.9  | 586               | 1.5  | 0.0   | 577               | 98.1                           | 1.9                     | 2.1               | 0.0      |
| Graubünden-Glarus    | 2000-2014       | 531                | 0.0              | 0.0     | 10.4  | 476               | 0.2  | 0.0   | 475               | 96.2                           | 0.2                     | 19.6              | 0.0      |
| Neuchâtel            | 2000-2014       | 271                | 0.0              | 0.7     | 8.1   | 247               | 0.4  | 0.0   | 246               | 98.4                           | 0.8                     | 1.2               | 1.2      |
| St Gallen-Appenzell  | 2000-2014       | 949                | 0.0              | 0.0     | 8.3   | 870               | 0.6  | 0.0   | 865               | 96.1                           | 0.0                     | 1.4               | 0.0      |
| Ticino               | 2000-2014       | 898                | 0.0              | 0.0     | 0.2   | 896               | 2.2  | 0.0   | 876               | 98.6                           | 1.6                     | 1.4               | 0.0      |
| Valais               | 2000-2014       | 661                | 0.0              | 3.0     | 3.5   | 618               | 1.5  | 0.0   | 609               | 96.2                           | 0.0                     | 1.6               | 0.0      |

Web-table 2.2: Data quality indicators, patients diagnosed during 2000-2014, by continent, country and registry: STOMACH

|                              | Calendar period | Patients submitted | Ineligible (%) ¶ |            |            | Eligible patients | Excluded (%) ¶¶ |            | Patients included | Data quality indicators (%) †† |                         |                   |            |
|------------------------------|-----------------|--------------------|------------------|------------|------------|-------------------|-----------------|------------|-------------------|--------------------------------|-------------------------|-------------------|------------|
|                              |                 |                    | Incomplete dates | In situ    | Other      |                   | DCO             | Other      |                   | MV                             | Non-specific morphology | Lost to follow-up | Censored   |
| Zürich                       | 2000-2013       | 2,197              | 0.0              | 0.0        | 12.7       | 1,917             | 2.2             | 0.0        | 1,874             | 98.5                           | 1.6                     | 1.1               | 4.4        |
| Switzerland (Childhood) †    | -               | -                  |                  |            |            |                   |                 |            |                   |                                |                         |                   |            |
| United Kingdom *             | 2000-2014       | 121,705            | 0.1              | 1.1        | 0.7        | 119,427           | 1.9             | 0.1        | 116,935           | 96.6                           | 3.1                     | 0.6               | 0.0        |
| England                      | 2000-2014       | 97,923             | 0.1              | 1.2        | 0.0        | 96,645            | 2.0             | 0.2        | 94,554            | 97.1                           | 3.4                     | 0.8               | 0.0        |
| Northern Ireland             | 2000-2014       | 3,722              | 0.0              | 2.4        | 5.1        | 3,442             | 1.3             | 0.2        | 3,388             | 93.5                           | 7.2                     | 0.0               | 0.0        |
| Scotland                     | 2000-2014       | 12,268             | 0.0              | 0.7        | 2.7        | 11,851            | 0.7             | 0.0        | 11,771            | 92.9                           | 0.3                     | 0.0               | 0.0        |
| Wales                        | 2000-2014       | 7,792              | 0.0              | 0.4        | 3.5        | 7,489             | 3.4             | 0.1        | 7,222             | 98.3                           | 2.3                     | 0.0               | 0.0        |
| <b>OCEANIA</b>               |                 | <b>35,913</b>      | <b>0.1</b>       | <b>0.2</b> | <b>4.8</b> | <b>34,091</b>     | <b>1.7</b>      | <b>0.2</b> | <b>33,411</b>     | <b>96.7</b>                    | <b>3.3</b>              | <b>0.0</b>        | <b>0.0</b> |
| Australia *                  | 2000-2014       | 30,253             | 0.2              | 0.2        | 5.7        | 28,431            | 1.4             | 0.3        | 27,952            | 97.2                           | 2.6                     | 0.0               | 0.0        |
| Australian Capital Territory | 2000-2013       | 344                | 0.0              | 0.0        | 7.0        | 320               | 1.3             | 0.0        | 316               | 99.4                           | 0.6                     | 0.0               | 0.0        |
| New South Wales              | 2000-2012       | 9,049              | 0.1              | 0.0        | 5.8        | 8,515             | 1.3             | 0.5        | 8,368             | 98.7                           | 1.6                     | 0.0               | 0.0        |
| Northern Territory           | 2000-2013       | 110                | 0.0              | 0.0        | 0.0        | 110               | 0.0             | 0.0        | 110               | 100.0                          | 0.0                     | 0.0               | 0.0        |
| Queensland                   | 2000-2014       | 6,652              | 0.6              | 0.5        | 16.2       | 5,501             | 1.8             | 0.2        | 5,390             | 98.4                           | 1.9                     | 0.0               | 0.0        |
| South Australia              | 2000-2013       | 2,316              | 0.0              | 0.0        | 0.0        | 2,314             | 0.2             | 0.4        | 2,299             | 94.6                           | 0.7                     | 0.0               | 0.0        |
| Tasmania                     | 2000-2013       | 848                | 0.0              | 0.5        | 9.9        | 760               | 1.4             | 0.3        | 747               | 95.9                           | 4.3                     | 0.0               | 0.0        |
| Victoria                     | 2000-2014       | 8,283              | 0.0              | 0.2        | 0.0        | 8,261             | 2.0             | 0.2        | 8,084             | 95.5                           | 4.7                     | 0.0               | 0.0        |
| Western Australia            | 2000-2014       | 2,651              | 0.0              | 0.0        | 0.0        | 2,650             | 0.4             | 0.1        | 2,638             | 97.3                           | 2.9                     | 0.0               | 0.0        |
| New Zealand *                | 2000-2014       | 5,660              | 0.0              | 0.0        | 0.0        | 5,660             | 3.4             | 0.1        | 5,459             | 94.2                           | 6.7                     | 0.0               | 0.0        |
| <b>Total</b>                 |                 | <b>2,195,430</b>   | <b>0.7</b>       | <b>0.4</b> | <b>2.7</b> | <b>2,112,476</b>  | <b>4.2</b>      | <b>0.2</b> | <b>2,019,382</b>  | <b>94.2</b>                    | <b>6.2</b>              | <b>0.5</b>        | <b>0.9</b> |

Web-table 2.3: Data quality indicators, patients diagnosed during 2000-2014, by continent, country and registry: COLON

|                                    | Calendar period | Patients submitted | Ineligible (%) ¶ |            |            | Excluded (%) ¶¶   |             |            | Data quality indicators (%) †† |             |                         |                   |             |
|------------------------------------|-----------------|--------------------|------------------|------------|------------|-------------------|-------------|------------|--------------------------------|-------------|-------------------------|-------------------|-------------|
|                                    |                 |                    | Incomplete dates | In situ    | Other      | Eligible patients | DCO         | Other      | Patients included              | MV          | Non-specific morphology | Lost to follow-up | Censored    |
| <b>AFRICA</b>                      |                 | <b>2,492</b>       | <b>9.5</b>       | <b>0.0</b> | <b>1.2</b> | <b>2,226</b>      | <b>1.1</b>  | <b>1.3</b> | <b>2,172</b>                   | <b>97.4</b> | <b>8.3</b>              | <b>1.3</b>        | <b>32.3</b> |
| Algerian registries                | 2000-2014       | 1,444              | 4.2              | 0.0        | 1.0        | 1,369             | 1.5         | 1.2        | 1,331                          | 98.6        | 6.2                     | 0.0               | 34.4        |
| Annaba                             | 2000-2014       | 381                | 11.5             | 0.0        | 2.6        | 327               | 1.8         | 1.5        | 316                            | 94.6        | 0.0                     | 0.0               | 84.2        |
| Sétif                              | 2000-2010       | 618                | 2.8              | 0.0        | 0.6        | 597               | 0.5         | 1.5        | 585                            | 99.8        | 10.9                    | 0.0               | 32.6        |
| Tlemcen                            | 2006-2014       | 445                | 0.0              | 0.0        | 0.0        | 445               | 2.7         | 0.7        | 430                            | 100.0       | 4.2                     | 0.0               | 0.2         |
| Mali (Bamako)                      | -               | -                  | -                | -          | -          | -                 | -           | -          | -                              | -           | -                       | -                 | -           |
| Mauritius *                        | 2005-2012       | 506                | 0.0              | 0.0        | 0.6        | 503               | 0.0         | 1.8        | 494                            | 98.6        | 13.6                    | 0.0               | 5.5         |
| Morocco (Casablanca)               | -               | -                  | -                | -          | -          | -                 | -           | -          | -                              | -           | -                       | -                 | -           |
| Nigeria (Ibadan)                   | 2005-2014       | 423                | 41.4             | 0.0        | 2.8        | 236               | 1.7         | 0.8        | 230                            | 100.0       | 0.0                     | 0.0               | 75.7        |
| South Africa (Eastern Cape)        | 2000-2014       | 119                | 0.0              | 0.0        | 0.8        | 118               | 0.0         | 0.8        | 117                            | 73.5        | 26.5                    | 24.8              | 35.9        |
| <b>AMERICA (Central and South)</b> |                 | <b>105,194</b>     | <b>6.9</b>       | <b>0.9</b> | <b>0.6</b> | <b>96,415</b>     | <b>13.6</b> | <b>0.5</b> | <b>82,843</b>                  | <b>89.8</b> | <b>10.0</b>             | <b>7.2</b>        | <b>2.1</b>  |
| Argentinian registries             | 2002-2013       | 7,294              | 0.8              | 0.6        | 0.7        | 7,137             | 14.6        | 0.2        | 6,076                          | 97.0        | 3.9                     | 0.0               | 0.0         |
| Chubut                             | 2008-2013       | 529                | 11.5             | 0.6        | 0.2        | 464               | 4.3         | 1.1        | 439                            | 90.7        | 11.8                    | 0.0               | 0.0         |
| Córdoba                            | 2004-2012       | 2,696              | 0.0              | 1.4        | 0.9        | 2,633             | 14.5        | 0.0        | 2,251                          | 97.7        | 3.3                     | 0.0               | 0.0         |
| Mendoza                            | 2003-2013       | 3,946              | 0.0              | 0.1        | 0.6        | 3,918             | 16.3        | 0.3        | 3,268                          | 97.6        | 3.0                     | 0.0               | 0.0         |
| Tierra del Fuego                   | 2005-2013       | 123                | 0.0              | 0.8        | 0.0        | 122               | 3.3         | 0.0        | 118                            | 90.7        | 10.2                    | 0.0               | 0.0         |
| Argentina (Childhood) †            | -               | -                  | -                | -          | -          | -                 | -           | -          | -                              | -           | -                       | -                 | -           |
| Brazilian registries               | 2000-2014       | 30,286             | 21.0             | 0.6        | 0.3        | 23,629            | 6.9         | 0.0        | 21,984                         | 89.4        | 10.7                    | 26.4              | 0.0         |
| Aracaju                            | 2000-2012       | 629                | 1.1              | 0.6        | 0.3        | 616               | 3.9         | 0.0        | 592                            | 98.3        | 1.9                     | 0.0               | 0.0         |
| Cuiabá                             | -               | -                  | -                | -          | -          | -                 | -           | -          | -                              | -           | -                       | -                 | -           |
| Curitiba                           | 2000-2012       | 3,179              | 0.0              | 0.0        | 0.2        | 3,173             | 16.7        | 0.1        | 2,641                          | 94.7        | 5.7                     | 0.0               | 0.0         |
| Goiânia                            | -               | -                  | -                | -          | -          | -                 | -           | -          | -                              | -           | -                       | -                 | -           |
| Juá                                | 2000-2014       | 391                | 0.8              | 0.3        | 1.0        | 383               | 1.8         | 0.0        | 376                            | 97.3        | 3.2                     | 0.0               | 1.3         |
| São Paulo                          | 2000-2012       | 26,087             | 24.4             | 0.7        | 0.3        | 19,457            | 5.6         | 0.0        | 18,375                         | 88.2        | 11.9                    | 31.6              | 0.0         |
| Chilean registries                 | 2000-2012       | 2,145              | 0.0              | 0.0        | 0.7        | 2,131             | 8.5         | 0.0        | 1,949                          | 86.9        | 10.7                    | 0.0               | 15.9        |
| Antofagasta                        | 2003-2010       | 422                | 0.0              | 0.0        | 0.7        | 419               | 14.1        | 0.0        | 360                            | 88.3        | 11.9                    | 0.0               | 18.3        |
| Biobio                             | 2003-2012       | 450                | 0.0              | 0.0        | 0.2        | 449               | 3.1         | 0.0        | 435                            | 76.3        | 24.1                    | 0.0               | 11.0        |
| Concepción                         | 2006-2010       | 736                | 0.0              | 0.0        | 0.8        | 730               | 8.1         | 0.0        | 671                            | 91.2        | 8.8                     | 0.0               | 17.9        |
| Los Rios                           | 2000-2012       | 537                | 0.0              | 0.0        | 0.7        | 533               | 9.4         | 0.0        | 483                            | 89.4        | 0.2                     | 0.0               | 15.5        |
| Colombian registries               | 2000-2014       | 4,291              | 2.6              | 0.0        | 1.4        | 4,119             | 5.2         | 0.8        | 3,874                          | 88.9        | 10.9                    | 0.0               | 23.1        |
| Bucaramanga                        | -               | -                  | -                | -          | -          | -                 | -           | -          | -                              | -           | -                       | -                 | -           |
| Cali                               | 2000-2014       | 3,586              | 1.5              | 0.0        | 1.5        | 3,482             | 5.3         | 0.8        | 3,272                          | 88.5        | 10.7                    | 0.0               | 26.3        |
| Manizales                          | 2003-2012       | 460                | 11.3             | 0.0        | 0.4        | 406               | 1.5         | 1.2        | 395                            | 92.9        | 9.6                     | 0.0               | 8.9         |
| Pasto                              | 2000-2012       | 245                | 3.3              | 0.0        | 2.4        | 231               | 10.4        | 0.0        | 207                            | 87.9        | 15.9                    | 0.0               | 0.0         |
| Costa Rica *                       | 2002-2014       | 6,020              | 0.0              | 0.0        | 1.0        | 5,961             | 8.0         | 0.8        | 5,438                          | 87.5        | 15.3                    | 0.0               | 0.0         |
| Cuba *                             | 2000-2012       | 22,635             | 0.0              | 0.0        | 0.3        | 22,557            | 32.0        | 1.3        | 15,047                         | 77.6        | 20.4                    | 0.0               | 0.0         |
| Ecuadorian registries              | 2000-2013       | 3,948              | 6.2              | 0.6        | 0.9        | 3,646             | 10.6        | 1.6        | 3,203                          | 90.5        | 10.2                    | 0.2               | 2.2         |
| Cuenca                             | 2000-2012       | 261                | 37.2             | 0.4        | 1.9        | 158               | 8.9         | 0.0        | 144                            | 86.8        | 13.9                    | 0.0               | 27.8        |
| Guayaquil                          | 2005-2013       | 1,306              | 0.0              | 0.6        | 0.5        | 1,291             | 9.7         | 4.4        | 1,109                          | 88.5        | 12.2                    | 0.0               | 0.1         |
| Loja                               | 2000-2013       | 194                | 0.0              | 0.5        | 3.6        | 186               | 2.2         | 0.0        | 182                            | 83.5        | 18.7                    | 3.8               | 0.0         |
| Manabí                             | 2000-2013       | 635                | 7.7              | 0.5        | 2.4        | 568               | 19.5        | 0.0        | 457                            | 82.7        | 17.9                    | 0.0               | 1.1         |
| Quito                              | 2000-2013       | 1,552              | 6.4              | 0.6        | 0.1        | 1,443             | 9.1         | 0.0        | 1,311                          | 96.3        | 4.3                     | 0.0               | 1.8         |
| Guadeloupe *                       | 2008-2013       | 810                | 0.0              | 10.4       | 0.0        | 726               | 0.1         | 0.1        | 724                            | 99.3        | 1.2                     | 0.0               | 47.9        |
| Martinique *                       | 2000-2012       | 1,328              | 0.0              | 0.0        | 0.1        | 1,327             | 0.0         | 1.7        | 1,305                          | 96.6        | 1.1                     | 8.7               | 0.0         |
| Mexico (Childhood) †               | -               | -                  | -                | -          | -          | -                 | -           | -          | -                              | -           | -                       | -                 | -           |
| Peru (Lima)                        | 2010-2012       | 3,302              | 0.2              | 0.0        | 2.6        | 3,209             | 12.6        | 0.0        | 2,803                          | 91.0        | 1.1                     | 0.0               | 4.2         |
| Puerto Rico *                      | 2000-2011       | 16,291             | 2.8              | 2.8        | 0.5        | 15,301            | 4.5         | 0.1        | 14,594                         | 98.7        | 2.2                     | 0.0               | 0.0         |
| Uruguay *                          | 2008-2012       | 6,844              | 0.0              | 1.8        | 0.7        | 6,672             | 12.4        | 0.0        | 5,846                          | 92.6        | 8.0                     | 0.0               | 0.0         |
| <b>AMERICA (North)</b>             |                 | <b>1,593,256</b>   | <b>0.4</b>       | <b>5.1</b> | <b>0.6</b> | <b>1,496,211</b>  | <b>1.5</b>  | <b>0.1</b> | <b>1,471,548</b>               | <b>98.3</b> | <b>2.1</b>              | <b>1.1</b>        | <b>0.0</b>  |
| Canadian registries                | 2000-2014       | 175,070            | 0.1              | 3.0        | 0.4        | 168,956           | 1.2         | 0.1        | 166,760                        | 95.8        | 4.1                     | 0.0               | 0.0         |
| Alberta                            | 2000-2014       | 18,995             | 0.1              | 4.6        | 0.6        | 17,967            | 0.3         | 0.1        | 17,889                         | 98.3        | 1.9                     | 0.0               | 0.0         |
| British Columbia                   | 2000-2014       | 29,890             | 0.3              | 2.9        | 1.3        | 28,561            | 1.2         | 0.1        | 28,192                         | 98.1        | 2.0                     | 0.0               | 0.0         |
| Manitoba                           | 2000-2014       | 10,139             | 0.1              | 12.9       | 0.5        | 8,775             | 1.0         | 0.1        | 8,678                          | 97.3        | 2.8                     | 0.0               | 0.0         |
| New Brunswick                      | 2000-2014       | 6,659              | 0.0              | 8.1        | 0.6        | 6,083             | 0.2         | 0.0        | 6,067                          | 94.5        | 0.1                     | 0.0               | 0.0         |
| Newfoundland & Labrador            | 2000-2014       | 5,831              | 0.3              | 5.8        | 1.0        | 5,415             | 1.3         | 0.1        | 5,342                          | 98.0        | 2.1                     | 0.0               | 0.0         |
| Nova Scotia                        | 2000-2014       | 8,930              | 0.3              | 3.9        | 0.4        | 8,513             | 0.7         | 0.1        | 8,444                          | 93.3        | 7.0                     | 0.0               | 0.0         |
| Ontario                            | 2000-2014       | 84,810             | 0.0              | 0.0        | 0.0        | 84,809            | 1.4         | 0.2        | 83,426                         | 94.5        | 5.8                     | 0.0               | 0.0         |
| Prince Edward Island               | 2000-2014       | 1,400              | 0.0              | 12.4       | 0.9        | 1,215             | 1.1         | 0.1        | 1,201                          | 94.6        | 5.4                     | 0.0               | 0.0         |
| Saskatchewan                       | 2000-2014       | 8,416              | 0.0              | 8.9        | 0.5        | 7,618             | 1.2         | 0.1        | 7,521                          | 97.5        | 2.6                     | 0.0               | 0.0         |
| US registries                      | 2000-2014       | 1,418,186          | 0.4              | 5.4        | 0.6        | 1,327,255         | 1.5         | 0.1        | 1,304,788                      | 98.6        | 1.9                     | 1.3               | 0.0         |
| Alabama                            | 2000-2014       | 30,865             | 0.4              | 6.1        | 0.4        | 28,724            | 1.3         | 0.1        | 28,321                         | 98.1        | 2.2                     | 0.0               | 0.0         |
| Alaska                             | 2000-2013       | 2,801              | 1.3              | 7.0        | 0.8        | 2,547             | 0.6         | 0.1        | 2,528                          | 98.3        | 2.7                     | 0.0               | 0.1         |
| Arkansas                           | 2000-2011       | 14,447             | 0.1              | 3.7        | 0.5        | 13,823            | 1.3         | 0.3        | 13,606                         | 99.4        | 0.9                     | 0.0               | 0.0         |
| California                         | 2000-2011       | 140,617            | 0.9              | 4.3        | 0.8        | 132,121           | 0.8         | 0.2        | 130,781                        | 98.8        | 1.5                     | 0.0               | 0.0         |
| Greater Bay Area                   | 2000-2014       | 33,955             | 0.4              | 3.8        | 0.9        | 32,239            | 1.0         | 0.2        | 31,864                         | 99.0        | 1.2                     | 5.8               | 0.0         |
| Greater California                 | 2000-2014       | 93,444             | 0.9              | 3.8        | 0.7        | 88,345            | 0.8         | 0.2        | 87,421                         | 98.5        | 1.9                     | 6.0               | 0.0         |
| Los Angeles                        | 2000-2014       | 45,743             | 1.3              | 5.3        | 0.8        | 42,367            | 0.7         | 0.2        | 41,984                         | 99.0        | 1.2                     | 11.5              | 0.0         |
| Colorado                           | 2000-2013       | 20,175             | 0.1              | 6.6        | 0.8        | 18,673            | 2.4         | 0.2        | 18,187                         | 98.3        | 1.9                     | 0.0               | 0.0         |
| Connecticut                        | 2000-2014       | 23,552             | 0.1              | 6.7        | 0.7        | 21,771            | 1.1         | 0.1        | 21,514                         | 98.9        | 1.5                     | 2.5               | 0.0         |
| Delaware                           | 2000-2014       | 5,475              | 0.2              | 4.0        | 0.6        | 5,211             | 1.6         | 0.1        | 5,124                          | 99.0        | 1.2                     | 0.0               | 0.0         |
| Florida                            | 2000-2013       | 119,380            | 0.1              | 5.1        | 0.5        | 112,624           | 2.0         | 0.2        | 110,218                        | 99.0        | 2.2                     | 0.0               | 0.0         |
| Georgia                            | 2000-2014       | 46,988             | 0.0              | 4.7        | 0.6        | 44,475            | 1.5         | 0.2        | 43,737                         | 99.0        | 1.5                     | 0.0               | 0.0         |
| Atlanta                            | 2000-2014       | 13,461             | 0.0              | 4.4        | 0.7        | 12,761            | 1.2         | 0.2        | 12,584                         | 99.1        | 1.3                     | 0.0               | 0.0         |
| Hawaii                             | 2000-2014       | 8,279              | 0.1              | 5.4        | 0.9        | 7,753             | 0.8         | 0.1        | 7,682                          | 98.6        | 1.5                     | 2.7               | 0.0         |
| Idaho                              | 2000-2014       | 6,903              | 0.4              | 2.3        | 0.8        | 6,663             | 2.1         | 0.1        | 6,517                          | 98.7        | 1.5                     | 0.0               | 0.0         |
| Indiana                            | 2000-2014       | 40,673             | 0.2              | 6.2        | 0.6        | 37,785            | 1.4         | 0.1        | 37,211                         | 98.8        | 1.5                     | 0.0               | 0.0         |
| Iowa                               | 2000-2014       | 21,701             | 0.3              | 2.5        | 0.6        | 20,968            | 1.3         | 0.1        | 20,672                         | 98.3        | 2.1                     | 1.6               | 0.0         |
| Kentucky                           | 2000-2014       | 30,531             | 0.0              | 6.0        | 0.6        | 28,522            | 0.8         | 0.2        | 28,244                         | 98.1        | 2.0                     | 0.8               | 0.0         |
| Louisiana                          | 2000-2014       | 28,987             | 0.2              | 4.7        | 0.6        | 27,415            | 1.1         | 0.1        | 27,068                         | 99.0        | 1.2                     | 1.9               | 0.0         |
| Maine                              | 2000-2013       | 8,974              | 0.1              | 4.8        | 0.7        | 8,473             | 1.9         | 0.2        | 8,296                          | 98.1        | 2.2                     | 0.0               | 0.0         |
| Massachusetts                      | 2000-2009       | 31,216             | 0.0              | 7.9        | 0.6        | 28,548            | 1.4         | 0.1        | 28,094                         | 97.8        | 2.4                     | 0.0               | 0.0         |
| Michigan                           | 2000-2013       | 55,104             | 0.2              | 3.2        | 0.6        | 52,885            | 1.0         | 0.2        | 52,260                         | 97.7        | 2.7                     | 0.0               | 0.0         |

Web-table 2.3: Data quality indicators, patients diagnosed during 2000-2014, by continent, country and registry: COLON

|                     | Calendar period | Patients submitted | Ineligible (%) ¶ |            |            | Excluded (%) ¶¶   |            |            | Patients included | Data quality indicators (%) †† |                         |                   |            |
|---------------------|-----------------|--------------------|------------------|------------|------------|-------------------|------------|------------|-------------------|--------------------------------|-------------------------|-------------------|------------|
|                     |                 |                    | Incomplete dates | In situ    | Other      | Eligible patients | DCO        | Other      |                   | MV                             | Non-specific morphology | Lost to follow-up | Censored   |
| Detroit             | 2000-2014       | 24,338             | 0.4              | 2.1        | 0.6        | 23,580            | 1.2        | 0.1        | 23,281            | 99.4                           | 0.9                     | 2.8               | 0.0        |
| Minnesota           | 2000-2013       | 26,595             | 0.0              | 3.3        | 0.8        | 25,508            | 1.9        | 0.2        | 24,959            | 99.9                           | 0.2                     | 0.0               | 0.0        |
| Mississippi         | 2002-2014       | 16,979             | 0.3              | 5.1        | 0.5        | 15,978            | 2.1        | 0.1        | 15,629            | 99.3                           | 1.1                     | 0.0               | 0.0        |
| Missouri            | -               | -                  | -                | -          | -          | -                 | -          | -          | -                 | -                              | -                       | -                 | -          |
| Montana             | 2000-2014       | 5,816              | 0.3              | 2.8        | 0.7        | 5,593             | 2.2        | 0.1        | 5,466             | 99.1                           | 1.2                     | 0.0               | 0.0        |
| Nebraska            | 2000-2014       | 12,014             | 0.2              | 3.9        | 0.6        | 11,448            | 1.2        | 0.1        | 11,299            | 98.4                           | 1.8                     | 0.0               | 0.0        |
| New Hampshire       | 2000-2014       | 8,154              | 0.1              | 9.6        | 0.6        | 7,313             | 1.6        | 0.1        | 7,192             | 98.6                           | 1.6                     | 0.0               | 0.0        |
| New Jersey          | 2000-2014       | 60,357             | 0.6              | 6.9        | 0.6        | 55,477            | 1.2        | 0.1        | 54,752            | 98.9                           | 1.6                     | 25.9              | 0.0        |
| New Mexico          | 2000-2014       | 9,394              | 0.0              | 3.0        | 0.7        | 9,037             | 2.7        | 0.2        | 8,777             | 98.3                           | 2.8                     | 3.8               | 0.2        |
| New York            | 2000-2014       | 127,506            | 1.5              | 7.0        | 0.7        | 115,846           | 1.0        | 0.1        | 114,527           | 98.8                           | 1.6                     | 0.0               | 0.0        |
| New York City       | 2000-2014       | 49,341             | 2.1              | 6.9        | 0.7        | 44,547            | 0.9        | 0.1        | 44,094            | 99.2                           | 1.3                     | 0.0               | 0.0        |
| North Carolina      | 2000-2014       | 51,848             | 0.0              | 6.6        | 0.6        | 48,110            | 1.7        | 0.1        | 47,258            | 98.8                           | 1.6                     | 0.0               | 0.0        |
| Ohio                | 2000-2014       | 76,247             | 0.0              | 5.4        | 0.6        | 71,631            | 2.4        | 0.1        | 69,797            | 98.7                           | 2.0                     | 0.0               | 0.0        |
| Oklahoma            | 2000-2010       | 17,178             | 0.4              | 4.1        | 0.5        | 16,316            | 2.2        | 0.1        | 15,931            | 98.4                           | 2.6                     | 0.0               | 0.0        |
| Oregon              | 2000-2013       | 19,445             | 0.0              | 4.0        | 0.7        | 18,521            | 1.6        | 0.1        | 18,202            | 96.9                           | 3.6                     | 0.0               | 0.0        |
| Pennsylvania        | 2000-2014       | 99,558             | 0.4              | 8.5        | 0.6        | 90,096            | 1.6        | 0.1        | 88,568            | 98.8                           | 1.5                     | 0.0               | 0.0        |
| Rhode Island        | 2000-2014       | 7,121              | 0.1              | 4.2        | 0.5        | 6,780             | 1.5        | 0.1        | 6,672             | 98.3                           | 2.0                     | 0.0               | 0.0        |
| South Carolina      | 2000-2014       | 27,049             | 0.0              | 5.3        | 0.5        | 25,470            | 2.1        | 0.1        | 24,897            | 97.4                           | 3.0                     | 0.0               | 0.0        |
| Tennessee           | 2000-2011       | 29,762             | 0.3              | 4.0        | 0.5        | 28,340            | 2.2        | 0.1        | 27,691            | 99.2                           | 1.1                     | 0.0               | 0.0        |
| Texas               | 2000-2013       | 105,745            | 0.6              | 3.8        | 0.6        | 100,343           | 2.2        | 0.1        | 97,951            | 98.2                           | 3.0                     | 0.0               | 0.0        |
| Utah                | 2000-2014       | 8,378              | 0.1              | 5.0        | 1.1        | 7,853             | 0.5        | 0.3        | 7,792             | 98.4                           | 1.9                     | 3.5               | 0.1        |
| Vermont             | 2000-2013       | 3,496              | 0.1              | 4.9        | 0.7        | 3,298             | 1.8        | 0.1        | 3,236             | 98.5                           | 1.7                     | 0.0               | 0.0        |
| Washington          | 2000-2008       | 19,587             | 0.4              | 2.2        | 0.9        | 18,909            | 1.1        | 0.1        | 18,681            | 98.4                           | 1.8                     | 0.0               | 0.0        |
| Seattle             | 2000-2014       | 21,448             | 0.3              | 0.8        | 1.0        | 20,994            | 0.7        | 0.1        | 20,827            | 98.5                           | 1.6                     | 1.3               | 0.0        |
| West Virginia       | 2000-2014       | 14,888             | 0.7              | 5.2        | 0.6        | 13,926            | 0.9        | 0.1        | 13,775            | 98.2                           | 2.1                     | 0.0               | 0.0        |
| Wisconsin           | 2000-2013       | 31,761             | 0.3              | 4.6        | 0.7        | 29,990            | 2.5        | 0.2        | 29,200            | 98.8                           | 1.6                     | 0.0               | 0.0        |
| Wyoming             | 2000-2013       | 2,640              | 0.0              | 4.9        | 0.7        | 2,491             | 0.5        | 0.1        | 2,476             | 99.1                           | 1.3                     | 0.0               | 0.0        |
| <b>ASIA</b>         |                 | <b>800,871</b>     | <b>0.7</b>       | <b>6.4</b> | <b>0.3</b> | <b>742,014</b>    | <b>4.9</b> | <b>0.4</b> | <b>703,081</b>    | <b>94.1</b>                    | <b>7.0</b>              | <b>0.4</b>        | <b>1.1</b> |
| Chinese registries  | 2003-2013       | 35,606             | 0.4              | 0.0        | 0.3        | 35,376            | 1.0        | 0.0        | 35,001            | 85.4                           | 18.5                    | 4.8               | 0.1        |
| Beijing             | 2003-2013       | 17,382             | 0.0              | 0.0        | 0.0        | 17,371            | 0.8        | 0.0        | 17,223            | 84.8                           | 15.2                    | 8.2               | 0.2        |
| Changle             | 2003-2013       | 449                | 6.9              | 0.0        | 0.9        | 414               | 0.2        | 0.5        | 411               | 78.3                           | 28.0                    | 2.7               | 0.0        |
| Cixian              | 2003-2013       | 347                | 0.0              | 0.0        | 0.0        | 347               | 2.9        | 0.0        | 337               | 88.4                           | 11.6                    | 0.0               | 0.0        |
| Dafeng              | 2003-2013       | 469                | 0.0              | 0.0        | 0.0        | 469               | 0.2        | 0.0        | 468               | 87.4                           | 29.7                    | 0.0               | 0.0        |
| Dalian              | 2003-2013       | 4,871              | 0.0              | 0.0        | 0.0        | 4,871             | 3.5        | 0.0        | 4,701             | 91.2                           | 10.7                    | 0.0               | 0.1        |
| Donghai             | 2003-2013       | 489                | 0.2              | 0.0        | 0.0        | 488               | 1.4        | 0.0        | 481               | 55.5                           | 45.1                    | 4.4               | 0.0        |
| Feicheng            | 2003-2013       | 406                | 0.0              | 0.0        | 0.2        | 405               | 0.2        | 0.0        | 404               | 81.2                           | 20.0                    | 4.0               | 0.0        |
| Ganyu               | 2003-2013       | 297                | 0.0              | 0.0        | 0.0        | 297               | 0.0        | 0.0        | 297               | 42.4                           | 60.6                    | 3.0               | 0.3        |
| Guanyun             | 2004-2013       | 368                | 0.0              | 0.0        | 0.0        | 368               | 1.6        | 0.0        | 362               | 86.7                           | 47.0                    | 3.0               | 0.3        |
| Haimen              | 2003-2013       | 1,480              | 0.0              | 0.0        | 1.8        | 1,453             | 0.0        | 0.0        | 1,453             | 82.2                           | 17.8                    | 0.6               | 0.0        |
| Haining             | 2003-2013       | 1,080              | 0.0              | 0.0        | 0.3        | 1,077             | 0.6        | 0.0        | 1,071             | 96.1                           | 32.1                    | 0.0               | 0.0        |
| Jianhu              | 2003-2013       | 251                | 0.0              | 0.0        | 0.0        | 251               | 0.0        | 0.0        | 251               | 90.0                           | 61.4                    | 11.6              | 0.0        |
| Jiashan             | 2003-2013       | 1,097              | 0.0              | 0.6        | 0.5        | 1,084             | 0.1        | 0.0        | 1,083             | 95.7                           | 4.3                     | 0.8               | 0.1        |
| Jintan              | 2003-2013       | 625                | 0.0              | 0.0        | 0.0        | 625               | 0.5        | 0.0        | 622               | 50.6                           | 49.4                    | 1.4               | 0.0        |
| Lianyungang         | 2008-2013       | 475                | 0.0              | 0.0        | 0.4        | 473               | 0.8        | 0.0        | 469               | 87.0                           | 29.9                    | 15.4              | 0.2        |
| Linzhou             | 2003-2013       | 634                | 0.0              | 0.0        | 0.0        | 634               | 1.1        | 0.0        | 627               | 87.7                           | 12.3                    | 0.0               | 0.0        |
| Qidong              | 2003-2013       | 1,222              | 0.0              | 0.0        | 0.4        | 1,217             | 0.1        | 0.0        | 1,216             | 91.3                           | 8.7                     | 1.3               | 0.0        |
| Sihui               | 2003-2013       | 461                | 3.5              | 0.0        | 1.5        | 438               | 0.9        | 0.2        | 433               | 71.8                           | 51.3                    | 4.2               | 0.9        |
| Taixing             | 2003-2013       | 543                | 14.2             | 0.0        | 0.0        | 466               | 0.2        | 0.0        | 465               | 90.3                           | 39.8                    | 9.9               | 0.0        |
| Yangzhong           | 2003-2013       | 348                | 0.0              | 0.0        | 0.3        | 347               | 0.3        | 0.0        | 346               | 80.9                           | 95.4                    | 0.0               | 0.0        |
| Zhongshan           | 2003-2013       | 2,312              | 0.0              | 0.0        | 1.3        | 2,281             | 0.0        | 0.0        | 2,281             | 90.9                           | 10.5                    | 0.1               | 0.0        |
| Cyprus *            | 2004-2014       | 3,004              | 1.6              | 1.6        | 0.7        | 2,888             | 7.7        | 0.1        | 2,665             | 99.2                           | 1.1                     | 0.0               | 37.6       |
| Hong Kong *         | 2005-2014       | 29,835             | 2.7              | 0.0        | 0.0        | 29,017            | 0.7        | 0.1        | 28,797            | 93.2                           | 0.0                     | 3.9               | 0.0        |
| Indian registries   | 2000-2014       | 203                | 0.0              | 0.0        | 0.0        | 203               | 1.5        | 0.5        | 199               | 80.4                           | 22.6                    | 1.0               | 0.0        |
| Guwahati            | -               | -                  | -                | -          | -          | -                 | -          | -          | -                 | -                              | -                       | -                 | -          |
| Karunagappally      | 2000-2014       | 203                | 0.0              | 0.0        | 0.0        | 203               | 1.5        | 0.5        | 199               | 80.4                           | 22.6                    | 1.0               | 0.0        |
| Iran (Golestan)     | 2006-2007       | 234                | 0.0              | 0.0        | 0.9        | 232               | 6.9        | 0.0        | 216               | 75.5                           | 24.5                    | 13.4              | 0.0        |
| Israel *            | 2000-2013       | 37,249             | 0.0              | 2.5        | 1.7        | 35,683            | 4.8        | 0.1        | 33,938            | 98.0                           | 2.3                     | 0.0               | 0.0        |
| Japanese registries | 2000-2014       | 325,535            | 1.0              | 12.5       | 0.3        | 280,561           | 11.6       | 0.1        | 247,682           | 93.3                           | 10.5                    | 0.0               | 2.1        |
| Aichi               | 2003-2013       | 48,487             | 0.2              | 11.7       | 0.4        | 42,547            | 9.8        | 0.0        | 38,370            | 96.0                           | 5.4                     | 0.0               | 2.1        |
| Akita               | 2010-2014       | 7,171              | 0.8              | 18.2       | 0.4        | 5,775             | 0.0        | 2.5        | 5,633             | 91.3                           | 11.0                    | 0.0               | 45.4       |
| Ehime               | 2007-2013       | 7,923              | 0.1              | 14.1       | 0.7        | 6,742             | 14.6       | 0.0        | 5,760             | 95.2                           | 6.3                     | 0.0               | 0.0        |
| Fukui               | 2003-2009       | 4,035              | 0.2              | 13.7       | 0.7        | 3,442             | 1.7        | 0.0        | 3,385             | 92.7                           | 8.8                     | 0.0               | 1.8        |
| Gunma               | 2003-2012       | 12,682             | 18.3             | 9.3        | 0.1        | 9,164             | 21.5       | 0.1        | 7,192             | 91.4                           | 2.9                     | 0.0               | 1.3        |
| Hiroshima           | 2004-2008       | 12,550             | 0.1              | 23.7       | 0.6        | 9,493             | 5.7        | 0.0        | 8,949             | 99.5                           | 0.8                     | 0.0               | 0.4        |
| Hyogo               | 2007-2012       | 23,453             | 0.6              | 15.0       | 0.5        | 19,675            | 22.5       | 0.0        | 15,257            | 95.9                           | 5.9                     | 0.0               | 1.1        |
| Ibaraki             | 2006-2012       | 14,066             | 0.2              | 15.6       | 0.5        | 11,782            | 14.8       | 0.0        | 10,037            | 91.9                           | 17.6                    | 0.0               | 1.1        |
| Kanagawa            | 2000-2013       | 71,552             | 0.0              | 8.5        | 0.1        | 65,367            | 15.3       | 0.1        | 55,262            | 92.3                           | 22.6                    | 0.0               | 0.0        |
| Miyagi              | 2000-2010       | 20,333             | 1.5              | 20.2       | 0.0        | 15,912            | 8.5        | 0.1        | 14,540            | 94.1                           | 6.0                     | 0.0               | 1.7        |
| Niigata             | 2000-2013       | 28,961             | 0.1              | 8.5        | 0.5        | 26,318            | 7.5        | 0.1        | 24,315            | 92.6                           | 0.6                     | 0.0               | 0.0        |
| Osaka               | 2000-2008       | 41,274             | 0.0              | 10.5       | 0.3        | 36,805            | 8.1        | 0.0        | 33,815            | 90.2                           | 12.6                    | 0.0               | 2.9        |
| Saga                | 2006-2013       | 4,749              | 0.3              | 15.0       | 0.6        | 3,995             | 9.0        | 0.0        | 3,636             | 92.0                           | 9.8                     | 0.0               | 0.0        |
| Tochigi             | 2006-2013       | 12,046             | 0.3              | 14.1       | 0.6        | 10,242            | 12.7       | 0.0        | 8,943             | 95.7                           | 5.6                     | 0.0               | 0.9        |
| Yamagata            | 2003-2013       | 12,749             | 0.5              | 18.2       | 0.4        | 10,327            | 4.8        | 0.0        | 9,836             | 93.0                           | 9.3                     | 0.0               | 0.5        |
| Yamanashi           | 2008-2012       | 3,504              | 0.3              | 14.3       | 0.5        | 2,975             | 7.5        | 0.0        | 2,752             | 92.3                           | 9.2                     | 0.0               | 0.2        |
| Jordan *            | 2000-2014       | 5,319              | 0.2              | 1.7        | 0.9        | 5,170             | 0.1        | 0.9        | 5,116             | 99.7                           | 1.3                     | 4.3               | 0.0        |
| Korea * ‡           | 2000-2014       | 188,016            | 0.5              | 0.0        | 0.0        | 187,087           | 0.0        | 0.0        | 187,078           | 95.2                           | 5.7                     | 0.0               | 0.0        |
| Kuwait *            | 2000-2013       | 938                | 0.0              | 0.1        | 0.3        | 934               | 2.8        | 0.0        | 908               | 100.0                          | 0.0                     | 2.2               | 0.0        |
| Malaysia (Penang)   | 2000-2013       | 2,361              | 0.3              | 0.0        | 0.1        | 2,351             | 1.4        | 1.4        | 2,285             | 95.4                           | 7.5                     | 0.0               | 12.6       |
| Mongolia *          | -               | -                  | -                | -          | -          | -                 | -          | -          | -                 | -                              | -                       | -                 | -          |
| Qatar *             | 2000-2014       | 798                | 0.1              | 0.0        | 1.0        | 789               | 0.5        | 0.1        | 784               | 98.7                           | 1.8                     | 0.0               | 52.9       |
| Singapore *         | 2000-2014       | 17,660             | 0.0              | 0.9        | 0.8        | 17,367            | 0.8        | 0.0        | 17,225            | 96.3                           | 0.8                     | 0.0               | 0.0        |
| Taiwan *            | 2000-2014       | 117,982            | 0.1              | 7.6        | 0.0        | 108,846           | 0.0        | 0.0        | 108,844           | 96.3                           | 0.4                     | 0.0               | 0.0        |

Web-table 2.3: Data quality indicators, patients diagnosed during 2000-2014, by continent, country and registry: COLON

|                                | Calendar period | Patients submitted | Ineligible (%) ¶ |            |            | Excluded (%) ¶¶   |            |            | Patients included | Data quality indicators (%) †† |                         |                   |            |
|--------------------------------|-----------------|--------------------|------------------|------------|------------|-------------------|------------|------------|-------------------|--------------------------------|-------------------------|-------------------|------------|
|                                |                 |                    | Incomplete dates | In situ    | Other      | Eligible patients | DCO        | Other      |                   | MV                             | Non-specific morphology | Lost to follow-up | Censored   |
| Thai registries                | 2000-2014       | 16,634             | 0.0              | 0.0        | 0.5        | 16,540            | 3.4        | 13.2       | 13,801            | 79.2                           | 21.2                    | 0.1               | 3.0        |
| Bangkok                        | 2000-2012       | 9,651              | 0.0              | 0.0        | 0.5        | 9,602             | 3.3        | 22.6       | 7,109             | 79.5                           | 20.6                    | 0.0               | 0.0        |
| Khon Kaen                      | 2000-2014       | 2,022              | 0.0              | 0.0        | 0.1        | 2,019             | 0.8        | 0.3        | 1,997             | 76.1                           | 24.4                    | 0.0               | 4.3        |
| Lampang                        | 2000-2014       | 1,350              | 0.0              | 0.0        | 0.0        | 1,350             | 6.1        | 0.0        | 1,268             | 81.1                           | 18.9                    | 0.0               | 0.0        |
| Lamphun                        | 2000-2014       | 670                | 0.0              | 0.0        | 0.0        | 670               | 2.7        | 0.0        | 652               | 75.5                           | 24.5                    | 0.0               | 0.0        |
| Lopburi                        | 2000-2014       | 1,393              | 0.0              | 0.0        | 1.5        | 1,372             | 4.7        | 0.0        | 1,308             | 68.1                           | 31.9                    | 0.1               | 23.2       |
| Songkhla                       | 2000-2014       | 1,548              | 0.0              | 0.0        | 1.4        | 1,527             | 3.8        | 0.1        | 1,467             | 91.9                           | 10.8                    | 0.5               | 2.0        |
| Turkish registries             | 2000-2013       | 19,497             | 1.4              | 0.9        | 0.4        | 18,970            | 2.1        | 0.1        | 18,542            | 96.4                           | 6.5                     | 0.1               | 2.6        |
| Ankara                         | 2008-2012       | 5,549              | 0.0              | 0.6        | 0.6        | 5,479             | 0.4        | 0.0        | 5,458             | 99.6                           | 3.4                     | 0.0               | 1.0        |
| Antalya                        | 2006-2012       | 1,314              | 0.3              | 0.3        | 0.2        | 1,303             | 1.1        | 0.0        | 1,289             | 97.5                           | 4.7                     | 0.0               | 1.5        |
| Bursa                          | 2006-2012       | 1,891              | 4.3              | 0.0        | 0.6        | 1,798             | 4.6        | 0.2        | 1,712             | 94.3                           | 10.3                    | 0.0               | 0.0        |
| Edirne                         | 2006-2012       | 453                | 3.1              | 0.0        | 0.4        | 437               | 5.0        | 0.0        | 415               | 93.7                           | 7.0                     | 0.0               | 0.0        |
| Erzurum                        | 2006-2012       | 418                | 0.5              | 0.0        | 1.0        | 412               | 0.2        | 0.2        | 410               | 88.8                           | 15.1                    | 0.0               | 1.7        |
| Eskisehir                      | 2006-2012       | 855                | 0.0              | 0.0        | 0.0        | 855               | 1.1        | 0.7        | 840               | 92.0                           | 0.0                     | 0.2               | 0.4        |
| Izmir                          | 2000-2013       | 7,238              | 2.4              | 1.6        | 0.1        | 6,940             | 3.2        | 0.2        | 6,704             | 96.0                           | 7.6                     | 0.0               | 6.0        |
| Samsun                         | 2006-2012       | 1,040              | 0.0              | 0.3        | 0.2        | 1,035             | 2.2        | 0.0        | 1,012             | 93.7                           | 10.4                    | 2.4               | 0.0        |
| Trabzon                        | 2006-2012       | 739                | 0.3              | 2.3        | 1.2        | 711               | 1.3        | 0.0        | 702               | 93.7                           | 12.5                    | 0.0               | 0.4        |
| <b>EUROPE</b>                  |                 | <b>1,937,393</b>   | <b>0.1</b>       | <b>3.6</b> | <b>2.7</b> | <b>1,814,897</b>  | <b>2.7</b> | <b>0.1</b> | <b>1,764,170</b>  | <b>95.5</b>                    | <b>2.4</b>              | <b>0.8</b>        | <b>1.9</b> |
| Austria *                      | 2000-2014       | 51,507             | 0.0              | 4.6        | 0.4        | 48,942            | 5.1        | 0.7        | 46,127            | 98.9                           | 3.7                     | 0.0               | 0.0        |
| Belarus (Childhood) †          | -               | -                  | -                | -          | -          | -                 | -          | -          | -                 | -                              | -                       | -                 | -          |
| Belgium *                      | 2004-2014       | 76,167             | 0.0              | 16.4       | 0.1        | 63,563            | 0.0        | 0.0        | 63,540            | 99.1                           | 1.1                     | 0.8               | 0.0        |
| Bulgaria *                     | 2000-2014       | 41,693             | 0.0              | 0.0        | 0.0        | 41,693            | 9.2        | 0.0        | 37,854            | 91.2                           | 0.1                     | 0.1               | 0.0        |
| Croatia *                      | 2000-2014       | 29,045             | 0.0              | 0.5        | 0.0        | 28,898            | 5.2        | 0.1        | 27,382            | 87.3                           | 0.3                     | 0.0               | 0.0        |
| Czech Republic *               | 2000-2014       | 93,017             | 0.0              | 4.8        | 4.3        | 84,530            | 1.2        | 0.1        | 83,481            | 94.5                           | 0.2                     | 0.0               | 0.0        |
| Denmark *                      | 2000-2014       | 40,537             | 0.0              | 0.0        | 0.1        | 40,495            | 0.0        | 0.0        | 40,495            | 97.1                           | 4.6                     | 0.1               | 0.0        |
| Estonia *                      | 2000-2012       | 6,758              | 0.0              | 0.4        | 0.1        | 6,721             | 2.5        | 0.4        | 6,523             | 92.1                           | 0.5                     | 0.3               | 0.0        |
| Finland *                      | 2000-2014       | 26,313             | 0.2              | 0.0        | 0.9        | 26,031            | 2.4        | 0.1        | 25,374            | 97.5                           | 0.4                     | 0.1               | 0.0        |
| French registries              | 2000-2010       | 53,459             | 0.1              | 0.0        | 0.1        | 53,391            | 0.0        | 0.5        | 53,149            | 97.1                           | 0.2                     | 2.2               | 0.0        |
| Bas-Rhin                       | 2000-2010       | 5,096              | 0.0              | 0.0        | 0.0        | 5,095             | 0.0        | 0.3        | 5,080             | 97.9                           | 0.0                     | 1.1               | 0.0        |
| Basse Normandie                | -               | -                  | -                | -          | -          | -                 | -          | -          | -                 | -                              | -                       | -                 | -          |
| Burgundy Digestive             | 2000-2010       | 5,948              | 0.0              | 0.0        | 0.0        | 5,947             | 0.0        | 0.1        | 5,939             | 96.1                           | 0.3                     | 1.1               | 0.0        |
| Calvados                       | -               | -                  | -                | -          | -          | -                 | -          | -          | -                 | -                              | -                       | -                 | -          |
| Calvados Digestive             | 2000-2010       | 2,780              | 0.0              | 0.0        | 0.1        | 2,778             | 0.0        | 0.0        | 2,778             | 93.8                           | 0.3                     | 1.9               | 0.0        |
| Côte-d'Or Gynaecologic         | -               | -                  | -                | -          | -          | -                 | -          | -          | -                 | -                              | -                       | -                 | -          |
| Côte-d'Or Haematopoietic       | -               | -                  | -                | -          | -          | -                 | -          | -          | -                 | -                              | -                       | -                 | -          |
| Doubs                          | 2000-2010       | 2,262              | 0.0              | 0.0        | 0.0        | 2,261             | 0.0        | 0.1        | 2,259             | 97.3                           | 0.0                     | 1.1               | 0.0        |
| Finistère                      | 2005-2010       | 2,836              | 0.1              | 0.0        | 0.1        | 2,831             | 0.0        | 0.2        | 2,824             | 96.9                           | 0.2                     | 2.8               | 0.0        |
| Gironde CNS                    | -               | -                  | -                | -          | -          | -                 | -          | -          | -                 | -                              | -                       | -                 | -          |
| Gironde General                | 2005-2010       | 2,718              | 0.8              | 0.0        | 0.1        | 2,694             | 0.0        | 0.0        | 2,693             | 97.7                           | 0.3                     | 4.3               | 0.0        |
| Gironde Haematopoietic         | -               | -                  | -                | -          | -          | -                 | -          | -          | -                 | -                              | -                       | -                 | -          |
| Haut-Rhin                      | 2000-2010       | 3,770              | 0.0              | 0.0        | 0.0        | 3,769             | 0.0        | 0.4        | 3,755             | 99.0                           | 0.0                     | 2.5               | 0.0        |
| Haute-Vienne                   | 2009-2009       | 203                | 0.0              | 0.0        | 0.0        | 203               | 0.0        | 2.0        | 199               | 97.0                           | 0.0                     | 2.0               | 0.0        |
| Hérault                        | 2000-2010       | 5,294              | 0.0              | 0.0        | 0.1        | 5,291             | 0.0        | 0.5        | 5,267             | 97.2                           | 0.0                     | 3.0               | 0.0        |
| Isère                          | 2000-2010       | 5,097              | 0.0              | 0.0        | 0.1        | 5,093             | 0.0        | 0.9        | 5,049             | 96.6                           | 0.2                     | 1.0               | 0.0        |
| Lille Metro                    | 2008-2010       | 948                | 0.0              | 0.0        | 0.3        | 945               | 0.0        | 0.1        | 944               | 95.1                           | 0.1                     | 0.6               | 0.0        |
| Loire-Atlantique               | 2000-2010       | 9,216              | 0.2              | 0.0        | 0.0        | 9,197             | 0.0        | 1.2        | 9,091             | 98.1                           | 0.4                     | 3.4               | 0.0        |
| Manche                         | 2000-2010       | 2,504              | 0.0              | 0.0        | 0.0        | 2,503             | 0.0        | 0.1        | 2,501             | 97.7                           | 0.0                     | 1.5               | 0.0        |
| Somme                          | 2000-2010       | 2,543              | 0.0              | 0.0        | 0.0        | 2,542             | 0.0        | 0.5        | 2,529             | 96.7                           | 0.8                     | 2.8               | 0.0        |
| Tarn                           | 2000-2010       | 2,244              | 0.0              | 0.0        | 0.1        | 2,242             | 0.0        | 0.0        | 2,241             | 95.9                           | 0.4                     | 1.0               | 0.0        |
| France Childhood Haem †        | -               | -                  | -                | -          | -          | -                 | -          | -          | -                 | -                              | -                       | -                 | -          |
| France Childhood Solid †       | -               | -                  | -                | -          | -          | -                 | -          | -          | -                 | -                              | -                       | -                 | -          |
| German registries              | 2000-2014       | 226,344            | 0.3              | 5.1        | 0.8        | 212,463           | 9.9        | 0.0        | 191,396           | 98.3                           | 0.5                     | 0.3               | 16.2       |
| Brandenburg                    | 2000-2014       | 20,970             | 0.0              | 10.3       | 0.7        | 18,662            | 7.9        | 0.1        | 17,176            | 97.9                           | 0.3                     | 0.0               | 20.0       |
| Bremen                         | 2000-2013       | 6,739              | 0.0              | 18.9       | 1.1        | 5,388             | 4.9        | 0.0        | 5,121             | 98.1                           | 0.1                     | 3.4               | 0.0        |
| Hamburg                        | 2000-2013       | 11,671             | 0.0              | 0.0        | 0.0        | 11,668            | 11.5       | 0.0        | 10,328            | 98.5                           | 1.5                     | 4.0               | 0.0        |
| Lower Saxony                   | 2003-2013       | 52,774             | 1.2              | 0.0        | 0.4        | 51,909            | 11.0       | 0.0        | 46,194            | 99.8                           | 0.2                     | 0.0               | 22.2       |
| Mecklenburg-W. Pomerania       | 2000-2014       | 13,623             | 0.0              | 9.4        | 0.8        | 12,237            | 7.4        | 0.0        | 11,328            | 97.5                           | 0.3                     | 0.0               | 20.3       |
| Rhineland Palatinate           | 2000-2013       | 33,301             | 0.0              | 4.3        | 1.4        | 31,426            | 13.3       | 0.0        | 27,254            | 96.4                           | 0.0                     | 0.0               | 22.7       |
| Saarland                       | 2000-2012       | 8,198              | 0.0              | 2.0        | 0.0        | 8,038             | 3.5        | 0.1        | 7,747             | 99.0                           | 1.3                     | 0.0               | 0.0        |
| Saxony                         | 2000-2014       | 37,548             | 0.0              | 7.0        | 0.9        | 34,593            | 6.3        | 0.1        | 32,397            | 97.6                           | 0.8                     | 0.0               | 18.2       |
| Schleswig-Holstein             | 2000-2012       | 23,445             | 0.0              | 8.3        | 1.0        | 21,271            | 12.7       | 0.1        | 18,559            | 99.4                           | 0.7                     | 0.0               | 0.0        |
| Thuringia                      | 2000-2014       | 18,075             | 0.0              | 3.8        | 0.7        | 17,271            | 11.4       | 0.1        | 15,292            | 98.0                           | 0.3                     | 0.0               | 19.6       |
| Gibraltar *                    | 2000-2010       | 96                 | 11.5             | 2.1        | 0.0        | 83                | 1.2        | 1.2        | 81                | 100.0                          | 0.0                     | 0.0               | 40.7       |
| Greece (National Paediatric) † | -               | -                  | -                | -          | -          | -                 | -          | -          | -                 | -                              | -                       | -                 | -          |
| Iceland *                      | 2000-2014       | 1,455              | 0.0              | 0.0        | 0.4        | 1,449             | 1.1        | 0.0        | 1,433             | 97.5                           | 2.5                     | 0.0               | 0.0        |
| Ireland *                      | 2000-2013       | 22,802             | 0.0              | 1.2        | 1.8        | 22,100            | 1.7        | 0.0        | 21,724            | 93.6                           | 0.8                     | 0.0               | 0.0        |
| Italian registries             | 2000-2014       | 195,795            | 0.0              | 1.3        | 1.6        | 190,133           | 0.6        | 0.0        | 188,983           | 93.6                           | 7.0                     | 0.6               | 0.8        |
| Alto Adige                     | 2000-2010       | 2,678              | 0.0              | 0.0        | 0.1        | 2,675             | 1.0        | 0.0        | 2,647             | 97.3                           | 2.8                     | 0.0               | 0.0        |
| Barletta-Andria-Trani          | 2006-2012       | 1,200              | 0.0              | 0.0        | 0.1        | 1,199             | 0.9        | 0.1        | 1,187             | 93.5                           | 7.0                     | 1.3               | 0.0        |
| Basilicata                     | 2006-2010       | 1,478              | 0.0              | 0.0        | 0.1        | 1,477             | 0.0        | 0.0        | 1,477             | 89.3                           | 10.8                    | 0.3               | 0.9        |
| Bergamo                        | 2007-2012       | 3,603              | 0.0              | 0.0        | 0.0        | 3,602             | 0.1        | 0.0        | 3,600             | 96.1                           | 4.1                     | 0.4               | 0.0        |
| Biella-Vercelli                | 2000-2010       | 2,211              | 0.0              | 7.4        | 2.4        | 1,994             | 1.4        | 0.1        | 1,965             | 96.3                           | 3.8                     | 0.2               | 1.5        |
| Brescia                        | 2000-2008       | 5,350              | 0.0              | 0.0        | 0.1        | 5,344             | 0.0        | 0.0        | 5,344             | 88.6                           | 12.4                    | 0.4               | 0.0        |
| Brindisi                       | 2006-2008       | 531                | 0.0              | 0.0        | 0.0        | 531               | 0.0        | 0.0        | 531               | 92.8                           | 7.3                     | 0.8               | 0.0        |
| Caserta                        | 2008-2010       | 1,109              | 0.0              | 0.0        | 0.1        | 1,108             | 0.0        | 0.0        | 1,108             | 95.8                           | 4.2                     | 0.5               | 7.0        |
| Catania-Messina-Enna           | 2003-2012       | 9,456              | 0.0              | 0.0        | 0.1        | 9,449             | 1.4        | 0.0        | 9,315             | 93.9                           | 9.7                     | 0.0               | 1.4        |
| Catanzaro                      | 2003-2009       | 963                | 0.0              | 0.0        | 0.1        | 962               | 0.0        | 0.0        | 962               | 91.9                           | 8.4                     | 0.2               | 0.6        |
| Como                           | 2003-2011       | 3,148              | 0.0              | 0.0        | 0.1        | 3,145             | 0.0        | 0.0        | 3,145             | 94.9                           | 5.1                     | 0.5               | 0.1        |
| Cremona                        | 2005-2010       | 1,398              | 0.0              | 0.0        | 0.0        | 1,398             | 0.5        | 0.0        | 1,391             | 93.4                           | 7.0                     | 0.7               | 0.0        |
| Ferrara                        | 2000-2011       | 4,153              | 0.0              | 0.0        | 0.0        | 4,152             | 0.3        | 0.0        | 4,139             | 94.2                           | 5.9                     | 0.7               | 0.0        |
| Friuli-Venezia-Giulia          | 2000-2010       | 10,096             | 0.0              | 0.0        | 0.0        | 10,092            | 2.8        | 0.0        | 9,808             | 95.6                           | 4.5                     | 0.4               | 0.0        |
| Genoa                          | 2000-2009       | 8,140              | 0.0              | 6.8        | 1.1        | 7,492             | 0.1        | 0.0        | 7,485             | 92.0                           | 8.0                     | 0.0               | 0.0        |
| Latina                         | 2000-2011       | 2,979              | 0.0              | 0.0        | 0.0        | 2,979             | 0.0        | 0.1        | 2,976             | 87.4                           | 13.0                    | 2.2               | 1.5        |
| Lecce                          | 2003-2008       | 2,370              | 0.0              | 0.0        | 0.1        | 2,367             | 0.0        | 0.0        | 2,367             | 91.2                           | 9.8                     | 0.2               | 1.3        |

Web-table 2.3: Data quality indicators, patients diagnosed during 2000-2014, by continent, country and registry: COLON

|                      | Calendar period | Patients submitted | Ineligible (%) ¶ |         |       | Excluded (%) ¶¶   |      |       | Patients included | Data quality indicators (%) †† |                         |                   |          |
|----------------------|-----------------|--------------------|------------------|---------|-------|-------------------|------|-------|-------------------|--------------------------------|-------------------------|-------------------|----------|
|                      |                 |                    | Incomplete dates | In situ | Other | Eligible patients | DCO  | Other |                   | MV                             | Non-specific morphology | Lost to follow-up | Censored |
| Mantova              | 2000-2010       | 3,100              | 0.0              | 0.0     | 0.0   | 3,099             | 0.8  | 0.0   | 3,074             | 92.8                           | 7.5                     | 0.0               | 0.0      |
| Milano               | 2000-2012       | 15,283             | 0.0              | 0.0     | 0.1   | 15,273            | 0.1  | 0.0   | 15,258            | 93.4                           | 6.9                     | 2.8               | 0.4      |
| Modena               | 2000-2012       | 6,589              | 0.0              | 9.2     | 0.6   | 5,947             | 0.1  | 0.1   | 5,941             | 96.3                           | 3.8                     | 0.0               | 1.1      |
| Monza-Brianza        | 2007-2012       | 3,083              | 0.0              | 0.0     | 0.1   | 3,081             | 0.0  | 0.0   | 3,081             | 95.6                           | 5.6                     | 0.6               | 0.0      |
| Naples               | 2000-2012       | 3,761              | 0.0              | 0.0     | 0.1   | 3,759             | 0.0  | 0.1   | 3,754             | 95.0                           | 5.1                     | 1.3               | 1.9      |
| Nuoro                | 2003-2012       | 1,098              | 0.0              | 0.0     | 0.0   | 1,098             | 1.1  | 0.0   | 1,086             | 94.3                           | 6.4                     | 0.0               | 0.0      |
| Palermo              | 2003-2012       | 6,106              | 0.0              | 0.0     | 0.0   | 6,104             | 1.9  | 0.0   | 5,990             | 90.5                           | 9.9                     | 0.1               | 0.0      |
| Parma                | 2000-2014       | 4,673              | 0.0              | 0.3     | 0.5   | 4,632             | 0.3  | 0.0   | 4,617             | 94.0                           | 6.2                     | 1.1               | 0.0      |
| Pavia                | 2003-2009       | 2,798              | 0.0              | 0.0     | 0.1   | 2,796             | 0.0  | 0.0   | 2,795             | 91.5                           | 8.6                     | 0.3               | 0.5      |
| Piacenza             | 2006-2011       | 1,269              | 0.0              | 0.0     | 0.0   | 1,269             | 0.0  | 0.2   | 1,267             | 96.1                           | 4.3                     | 0.2               | 3.4      |
| Ragusa               | 2000-2012       | 2,731              | 0.0              | 1.5     | 1.0   | 2,664             | 1.7  | 0.1   | 2,617             | 92.4                           | 9.4                     | 0.3               | 0.0      |
| Reggio Emilia        | 2000-2012       | 3,781              | 0.0              | 0.0     | 0.0   | 3,780             | 0.0  | 0.1   | 3,778             | 94.2                           | 6.3                     | 1.0               | 0.0      |
| Romagna              | 2000-2012       | 11,858             | 0.0              | 6.1     | 0.1   | 11,128            | 0.1  | 0.0   | 11,120            | 94.3                           | 5.7                     | 0.1               | 0.0      |
| Salerno              | 2000-2009       | 4,493              | 0.0              | 0.0     | 0.1   | 4,489             | 0.0  | 0.0   | 4,488             | 87.5                           | 12.6                    | 0.3               | 3.4      |
| Sassari              | 2000-2011       | 2,617              | 0.0              | 0.0     | 0.0   | 2,617             | 1.9  | 0.0   | 2,565             | 94.0                           | 8.5                     | 0.0               | 0.0      |
| Siracusa             | 2000-2012       | 2,404              | 0.0              | 0.0     | 0.0   | 2,403             | 1.9  | 0.0   | 2,358             | 93.9                           | 7.2                     | 0.0               | 1.0      |
| Sondrio              | 2000-2011       | 1,264              | 0.0              | 0.0     | 0.0   | 1,264             | 0.0  | 0.1   | 1,263             | 94.9                           | 5.5                     | 0.5               | 0.4      |
| Taranto              | 2006-2012       | 1,987              | 0.0              | 0.0     | 0.1   | 1,986             | 1.6  | 0.0   | 1,954             | 95.9                           | 4.8                     | 2.2               | 0.0      |
| Trapani              | 2002-2010       | 1,644              | 0.0              | 0.0     | 0.1   | 1,643             | 0.3  | 0.0   | 1,638             | 91.0                           | 11.0                    | 0.9               | 0.4      |
| Trento               | 2000-2010       | 3,083              | 0.0              | 0.0     | 0.1   | 3,080             | 0.5  | 0.0   | 3,064             | 96.8                           | 4.0                     | 0.5               | 0.0      |
| Turin                | 2000-2012       | 8,517              | 0.0              | 1.6     | 0.4   | 8,346             | 1.0  | 0.0   | 8,266             | 95.3                           | 4.8                     | 1.7               | 0.0      |
| Tuscany              | 2000-2009       | 11,351             | 0.0              | 1.8     | 25.2  | 8,282             | 0.6  | 0.1   | 8,221             | 92.6                           | 9.3                     | 0.0               | 1.6      |
| Umbria               | 2000-2013       | 9,093              | 0.0              | 0.0     | 0.1   | 9,087             | 0.1  | 0.0   | 9,074             | 93.8                           | 6.8                     | 0.1               | 0.1      |
| Varese               | 2000-2012       | 6,951              | 0.0              | 0.0     | 0.1   | 6,945             | 0.1  | 0.0   | 6,936             | 94.1                           | 6.0                     | 0.5               | 0.2      |
| Veneto               | 2000-2009       | 14,239             | 0.0              | 0.0     | 0.0   | 14,236            | 0.2  | 0.0   | 14,201            | 94.6                           | 5.7                     | 0.4               | 1.9      |
| Viterbo              | 2006-2010       | 1,159              | 0.0              | 0.0     | 0.0   | 1,159             | 2.5  | 0.0   | 1,130             | 91.2                           | 9.6                     | 0.1               | 30.2     |
| Piedmont Childhood   | -               | -                  | -                | -       | -     | -                 | -    | -     | -                 | -                              | -                       | -                 | -        |
| Latvia *             | 2000-2014       | 10,162             | 0.0              | 0.0     | 24.4  | 7,677             | 0.0  | 0.2   | 7,658             | 100.0                          | 0.1                     | 0.0               | 0.0      |
| Lithuania *          | 2000-2012       | 11,988             | 0.0              | 0.1     | 0.3   | 11,941            | 6.6  | 0.0   | 11,148            | 85.7                           | 0.4                     | 0.0               | 0.2      |
| Malta *              | 2000-2013       | 2,044              | 0.0              | 0.1     | 3.6   | 1,968             | 2.8  | 0.2   | 1,908             | 95.5                           | 5.1                     | 0.0               | 0.0      |
| Netherlands *        | 2000-2014       | 127,557            | 0.0              | 0.0     | 0.7   | 126,710           | 0.2  | 0.2   | 126,237           | 97.5                           | 2.9                     | 0.3               | 0.0      |
| Norway *             | 2000-2014       | 62,882             | 0.0              | 2.7     | 38.7  | 36,807            | 0.4  | 0.1   | 36,646            | 100.0                          | 0.0                     | 0.2               | 0.0      |
| Poland *             | 2000-2014       | 144,308            | 0.0              | 0.0     | 0.0   | 144,281           | 2.6  | 0.3   | 140,075           | 90.8                           | 0.2                     | 0.0               | 0.0      |
| Greater Poland       | 2000-2014       | 14,013             | 0.0              | 0.0     | 0.0   | 14,011            | 5.1  | 0.3   | 13,250            | 93.7                           | 0.2                     | 0.0               | 0.0      |
| Holy Cross           | 2000-2014       | 5,079              | 0.0              | 0.0     | 0.0   | 5,079             | 2.2  | 0.3   | 4,952             | 95.0                           | 0.8                     | 0.0               | 0.0      |
| Kujavia-Pomerania    | 2000-2014       | 7,975              | 0.0              | 0.0     | 0.0   | 7,973             | 0.8  | 0.2   | 7,894             | 96.8                           | 0.1                     | 0.0               | 0.0      |
| Lesser Poland        | 2000-2014       | 11,582             | 0.0              | 0.0     | 0.0   | 11,580            | 3.6  | 0.2   | 11,139            | 92.3                           | 0.7                     | 0.0               | 0.0      |
| Łódź                 | 2000-2014       | 9,425              | 0.0              | 0.0     | 0.1   | 9,419             | 0.9  | 1.2   | 9,224             | 81.8                           | 0.1                     | 0.0               | 0.0      |
| Lower Silesia        | 2000-2014       | 12,556             | 0.0              | 0.0     | 0.0   | 12,554            | 0.4  | 0.0   | 12,497            | 84.8                           | 0.2                     | 0.2               | 0.0      |
| Lublin               | 2000-2014       | 7,702              | 0.0              | 0.0     | 0.0   | 7,702             | 5.8  | 0.2   | 7,239             | 86.6                           | 0.0                     | 0.0               | 0.0      |
| Lubush               | 2000-2014       | 3,792              | 0.0              | 0.0     | 0.1   | 3,790             | 2.2  | 0.2   | 3,700             | 92.8                           | 0.1                     | 0.0               | 0.0      |
| Mazovia              | 2000-2014       | 17,646             | 0.0              | 0.0     | 0.0   | 17,646            | 0.0  | 0.1   | 17,634            | 89.5                           | 0.1                     | 0.0               | 0.0      |
| Opole                | 2000-2014       | 4,070              | 0.0              | 0.0     | 0.0   | 4,070             | 0.1  | 0.2   | 4,060             | 96.6                           | 0.1                     | 0.0               | 0.0      |
| Podlaha              | 2000-2014       | 4,354              | 0.0              | 0.0     | 0.0   | 4,354             | 5.0  | 0.4   | 4,120             | 86.9                           | 0.3                     | 0.0               | 0.0      |
| Pomerania            | 2000-2014       | 9,631              | 0.0              | 0.0     | 0.0   | 9,629             | 7.9  | 0.2   | 8,848             | 97.0                           | 0.0                     | 0.0               | 0.0      |
| Silesia              | 2000-2014       | 18,589             | 0.0              | 0.0     | 0.0   | 18,586            | 1.2  | 0.2   | 18,328            | 89.5                           | 0.2                     | 0.0               | 0.0      |
| Subcarpathia         | 2000-2014       | 6,901              | 0.0              | 0.0     | 0.0   | 6,901             | 2.5  | 1.4   | 6,632             | 96.6                           | 0.1                     | 0.0               | 0.0      |
| Varmia-Mazuria       | 2000-2014       | 4,809              | 0.0              | 0.0     | 0.1   | 4,804             | 0.4  | 0.2   | 4,775             | 95.9                           | 0.4                     | 0.0               | 0.2      |
| West Pomerania       | 2000-2014       | 6,184              | 0.0              | 0.0     | 0.0   | 6,183             | 6.1  | 0.3   | 5,783             | 86.8                           | 0.0                     | 0.0               | 0.0      |
| Portugal *           | 2000-2014       | 59,554             | 0.8              | 0.7     | 2.3   | 57,282            | 0.1  | 0.0   | 57,219            | 97.8                           | 1.5                     | 1.4               | 0.0      |
| Azores               | 2000-2014       | 1,029              | 0.0              | 0.0     | 0.1   | 1,028             | 5.1  | 0.0   | 976               | 96.5                           | 3.6                     | 0.9               | 0.9      |
| Portugal Central     | 2003-2010       | 7,123              | 0.4              | 0.0     | 0.0   | 7,093             | 0.0  | 0.0   | 7,093             | 98.5                           | 1.8                     | 0.7               | 0.0      |
| Portugal North       | 2000-2010       | 14,735             | 2.8              | 0.0     | 0.4   | 14,277            | 0.0  | 0.0   | 14,276            | 98.1                           | 2.4                     | 0.0               | 0.0      |
| Portugal South       | 2000-2014       | 36,667             | 0.0              | 1.2     | 3.6   | 34,884            | 0.0  | 0.0   | 34,874            | 97.6                           | 1.1                     | 2.1               | 0.0      |
| Romania (Cluj)       | 2006-2012       | 1,909              | 0.0              | 2.4     | 1.2   | 1,841             | 15.7 | 0.0   | 1,552             | 91.9                           | 8.7                     | 0.0               | 0.0      |
| Russian registries ‡ | 2000-2014       | 29,392             | 0.0              | 0.1     | 0.1   | 29,332            | 1.0  | 0.3   | 28,946            | 84.9                           | 2.1                     | 2.1               | 1.4      |
| Arkhangelsk          | 2000-2014       | 5,360              | 0.0              | 0.1     | 0.0   | 5,353             | 0.9  | 0.4   | 5,284             | 83.0                           | 2.4                     | 0.9               | 0.0      |
| Karelia              | 2000-2014       | 3,283              | 0.0              | 0.5     | 0.6   | 3,245             | 2.8  | 0.2   | 3,148             | 75.5                           | 2.4                     | 0.9               | 3.7      |
| Omsk                 | 2000-2014       | 4,686              | 0.0              | 0.0     | 0.1   | 4,683             | 0.0  | 0.2   | 4,672             | 98.3                           | 4.9                     | 5.0               | 5.8      |
| Samara               | 2000-2014       | 13,810             | 0.0              | 0.0     | 0.1   | 13,799            | 1.2  | 0.2   | 13,607            | 83.1                           | 1.4                     | 1.8               | 0.0      |
| Tomsk                | 2005-2014       | 2,253              | 0.0              | 0.0     | 0.0   | 2,252             | 0.0  | 0.8   | 2,235             | 85.4                           | 0.0                     | 1.9               | 0.1      |
| Slovakia *           | 2000-2010       | 26,182             | 0.0              | 2.4     | 1.0   | 25,292            | 6.3  | 0.0   | 23,694            | 96.1                           | 4.0                     | 0.0               | 0.0      |
| Slovenia *           | 2000-2013       | 12,676             | 0.0              | 0.0     | 0.4   | 12,619            | 1.9  | 0.0   | 12,376            | 96.4                           | 0.1                     | 0.1               | 0.0      |
| Spanish registries   | 2000-2013       | 61,014             | 0.2              | 8.5     | 0.8   | 55,219            | 1.7  | 0.1   | 54,250            | 95.1                           | 1.3                     | 0.5               | 0.0      |
| Basque Country       | 2000-2013       | 22,556             | 0.0              | 14.0    | 0.2   | 19,357            | 1.3  | 0.2   | 19,083            | 94.1                           | 0.1                     | 0.4               | 0.0      |
| Canaries             | 2000-2011       | 7,518              | 0.0              | 7.5     | 0.5   | 6,916             | 1.2  | 0.0   | 6,833             | 96.9                           | 0.2                     | 0.1               | 0.0      |
| Girona               | 2000-2013       | 6,406              | 0.7              | 15.6    | 1.9   | 5,238             | 3.1  | 0.0   | 5,076             | 95.3                           | 5.6                     | 1.4               | 0.0      |
| Granada              | 2000-2012       | 4,690              | 0.0              | 0.0     | 0.3   | 4,676             | 2.3  | 0.0   | 4,567             | 94.7                           | 0.0                     | 0.3               | 0.0      |
| Mallorca             | 2000-2012       | 4,846              | 0.8              | 4.7     | 0.8   | 4,540             | 1.6  | 0.0   | 4,468             | 96.6                           | 0.4                     | 2.1               | 0.0      |
| Murcia               | 2000-2010       | 6,406              | 0.0              | 0.0     | 0.1   | 6,398             | 1.4  | 0.1   | 6,306             | 95.5                           | 5.1                     | 0.0               | 0.0      |
| Navarra              | 2000-2010       | 3,391              | 0.0              | 3.8     | 0.0   | 3,262             | 1.3  | 0.0   | 3,220             | 94.3                           | 0.2                     | 0.0               | 0.0      |
| Tarragona            | 2000-2011       | 5,201              | 0.8              | 1.7     | 4.6   | 4,832             | 2.8  | 0.0   | 4,697             | 95.3                           | 0.8                     | 0.0               | 0.0      |
| Spain Childhood      | -               | -                  | -                | -       | -     | -                 | -    | -     | -                 | -                              | -                       | -                 | -        |
| Valencia Childhood   | -               | -                  | -                | -       | -     | -                 | -    | -     | -                 | -                              | -                       | -                 | -        |
| Sweden *             | 2000-2014       | 69,488             | 0.0              | 17.7    | 1.0   | 56,493            | 1.3  | 0.1   | 55,664            | 98.7                           | 1.4                     | 0.1               | 0.0      |
| Swiss registries     | 2000-2014       | 25,875             | 0.0              | 5.0     | 11.8  | 21,524            | 1.2  | 0.6   | 21,137            | 97.5                           | 1.4                     | 3.9               | 2.9      |
| Basel                | 2000-2011       | 1,521              | 0.0              | 0.0     | 0.7   | 1,510             | 0.3  | 6.2   | 1,413             | 100.0                          | 0.0                     | 0.6               | 10.7     |
| Fribourg             | 2006-2014       | 1,012              | 0.0              | 8.6     | 2.0   | 905               | 0.0  | 3.1   | 877               | 97.8                           | 2.4                     | 2.3               | 0.0      |
| Geneva               | 2000-2013       | 2,950              | 0.0              | 14.7    | 2.2   | 2,450             | 1.7  | 0.1   | 2,407             | 96.5                           | 3.7                     | 3.8               | 0.0      |
| Graubünden-Glarus    | 2000-2014       | 1,361              | 0.0              | 0.0     | 0.7   | 1,352             | 0.1  | 0.0   | 1,350             | 95.7                           | 0.0                     | 35.0              | 0.0      |
| Neuchâtel            | 2000-2014       | 4,031              | 0.0              | 0.1     | 70.8  | 1,172             | 1.0  | 0.0   | 1,160             | 97.2                           | 0.9                     | 2.3               | 4.1      |
| St Gallen-Appenzell  | 2000-2014       | 3,002              | 0.0              | 0.0     | 0.7   | 2,980             | 0.3  | 0.0   | 2,970             | 96.8                           | 0.0                     | 2.3               | 0.0      |
| Ticino               | 2000-2014       | 2,530              | 0.0              | 8.4     | 0.0   | 2,317             | 1.2  | 0.0   | 2,289             | 98.3                           | 1.7                     | 1.8               | 0.0      |
| Valais               | 2000-2014       | 2,052              | 0.0              | 14.0    | 2.0   | 1,724             | 0.5  | 0.0   | 1,716             | 96.3                           | 0.1                     | 1.6               | 0.0      |

Web-table 2.3: Data quality indicators, patients diagnosed during 2000-2014, by continent, country and registry: COLON

|                              | Calendar period | Patients submitted | Ineligible (%) ¶ |            |            | Eligible patients | Excluded (%) ¶¶ |            | Patients included | Data quality indicators (%) †† |                         |                   |            |
|------------------------------|-----------------|--------------------|------------------|------------|------------|-------------------|-----------------|------------|-------------------|--------------------------------|-------------------------|-------------------|------------|
|                              |                 |                    | Incomplete dates | In situ    | Other      |                   | DCO             | Other      |                   | MV                             | Non-specific morphology | Lost to follow-up | Censored   |
| Zürich                       | 2000-2013       | 7,416              | 0.0              | 3.6        | 0.4        | 7,114             | 2.2             | 0.0        | 6,955             | 98.2                           | 1.9                     | 1.1               | 5.8        |
| Switzerland (Childhood) †    | -               | -                  |                  |            |            |                   |                 |            |                   |                                |                         |                   |            |
| United Kingdom *             | 2000-2014       | 427,374            | 0.1              | 3.3        | 1.8        | 405,419           | 1.7             | 0.1        | 398,118           | 95.5                           | 3.9                     | 1.8               | 0.0        |
| England                      | 2000-2014       | 348,115            | 0.1              | 3.5        | 1.3        | 331,045           | 1.8             | 0.1        | 324,752           | 96.3                           | 4.1                     | 2.2               | 0.0        |
| Northern Ireland             | 2000-2014       | 12,959             | 0.1              | 6.4        | 5.3        | 11,423            | 1.0             | 0.2        | 11,280            | 89.3                           | 11.0                    | 0.0               | 0.0        |
| Scotland                     | 2000-2014       | 41,437             | 0.0              | 1.7        | 2.1        | 39,885            | 0.6             | 0.0        | 39,633            | 89.4                           | 0.3                     | 0.1               | 0.0        |
| Wales                        | 2000-2014       | 24,863             | 0.0              | 0.6        | 6.6        | 23,066            | 2.6             | 0.0        | 22,453            | 97.2                           | 3.6                     | 0.0               | 0.0        |
| <b>OCEANIA</b>               |                 | <b>180,638</b>     | <b>0.2</b>       | <b>0.8</b> | <b>0.7</b> | <b>177,520</b>    | <b>1.4</b>      | <b>0.1</b> | <b>174,823</b>    | <b>96.5</b>                    | <b>3.3</b>              | <b>0.0</b>        | <b>0.0</b> |
| Australia *                  | 2000-2014       | 149,477            | 0.3              | 0.9        | 0.8        | 146,359           | 1.2             | 0.1        | 144,382           | 97.0                           | 2.7                     | 0.0               | 0.0        |
| Australian Capital Territory | 2000-2013       | 1,943              | 0.0              | 0.4        | 1.6        | 1,904             | 0.9             | 0.2        | 1,883             | 98.4                           | 1.6                     | 0.0               | 0.0        |
| New South Wales              | 2000-2012       | 43,710             | 0.1              | 0.0        | 0.4        | 43,482            | 1.1             | 0.2        | 42,944            | 98.6                           | 1.6                     | 0.0               | 0.0        |
| Northern Territory           | 2000-2013       | 635                | 0.0              | 0.0        | 0.2        | 634               | 0.3             | 0.0        | 632               | 96.8                           | 0.5                     | 0.0               | 0.0        |
| Queensland                   | 2000-2014       | 34,496             | 1.2              | 2.4        | 2.8        | 32,289            | 1.2             | 0.1        | 31,894            | 98.0                           | 2.3                     | 0.0               | 0.0        |
| South Australia              | 2000-2013       | 12,566             | 0.0              | 0.0        | 0.1        | 12,555            | 0.1             | 0.1        | 12,524            | 93.5                           | 0.5                     | 0.0               | 0.0        |
| Tasmania                     | 2000-2013       | 4,361              | 0.0              | 1.1        | 1.2        | 4,257             | 1.0             | 0.1        | 4,210             | 95.4                           | 4.9                     | 0.0               | 0.0        |
| Victoria                     | 2000-2014       | 38,609             | 0.0              | 1.4        | 0.0        | 38,084            | 2.2             | 0.1        | 37,220            | 95.5                           | 4.7                     | 0.0               | 0.0        |
| Western Australia            | 2000-2014       | 13,157             | 0.0              | 0.0        | 0.0        | 13,154            | 0.5             | 0.1        | 13,075            | 97.2                           | 3.0                     | 0.0               | 0.0        |
| New Zealand *                | 2000-2014       | 31,161             | 0.0              | 0.0        | 0.0        | 31,161            | 2.2             | 0.1        | 30,441            | 94.1                           | 6.2                     | 0.0               | 0.0        |
| <b>Total</b>                 |                 | <b>4,619,844</b>   | <b>0.5</b>       | <b>4.4</b> | <b>1.4</b> | <b>4,329,283</b>  | <b>2.8</b>      | <b>0.2</b> | <b>4,198,637</b>  | <b>96.2</b>                    | <b>3.3</b>              | <b>0.9</b>        | <b>1.1</b> |

Web-table 2.4: Data quality indicators, patients diagnosed during 2000-2014, by continent, country and registry: RECTUM

|                                    | Calendar period | Patients submitted | Ineligible (%) ¶ |            |            | Excluded (%) ¶¶   |            |            | Patients included | Data quality indicators (%) †† |                         |                   |             |
|------------------------------------|-----------------|--------------------|------------------|------------|------------|-------------------|------------|------------|-------------------|--------------------------------|-------------------------|-------------------|-------------|
|                                    |                 |                    | Incomplete dates | In situ    | Other      | Eligible patients | DCO        | Other      |                   | MV                             | Non-specific morphology | Lost to follow-up | Censored    |
| <b>AFRICA</b>                      |                 | <b>1,719</b>       | <b>11.2</b>      | <b>0.0</b> | <b>0.4</b> | <b>1,520</b>      | <b>0.3</b> | <b>1.8</b> | <b>1,487</b>      | <b>97.6</b>                    | <b>7.8</b>              | <b>0.8</b>        | <b>35.4</b> |
| Algerian registries                | 2000-2014       | 885                | 4.2              | 0.0        | 0.3        | 845               | 0.2        | 1.9        | 827               | 98.9                           | 8.1                     | 0.0               | 26.2        |
| Annaba                             | 2000-2014       | 154                | 9.7              | 0.0        | 1.3        | 137               | 0.0        | 0.7        | 136               | 93.4                           | 0.0                     | 0.0               | 86.8        |
| Sétif                              | 2000-2010       | 414                | 5.3              | 0.0        | 0.0        | 392               | 0.0        | 3.8        | 377               | 100.0                          | 11.1                    | 0.0               | 26.0        |
| Tlemcen                            | 2006-2014       | 317                | 0.0              | 0.0        | 0.3        | 316               | 0.6        | 0.0        | 314               | 100.0                          | 8.0                     | 0.0               | 0.3         |
| Mali (Bamako)                      | -               | -                  | -                | -          | -          | -                 | -          | -          | -                 | -                              | -                       | -                 | -           |
| Mauritius *                        | 2005-2012       | 297                | 0.0              | 0.0        | 0.7        | 295               | 0.0        | 2.0        | 289               | 99.7                           | 8.3                     | 0.0               | 15.2        |
| Morocco (Casablanca)               | -               | -                  | -                | -          | -          | -                 | -          | -          | -                 | -                              | -                       | -                 | -           |
| Nigeria (Ibadan)                   | 2005-2014       | 432                | 35.9             | 0.0        | 0.5        | 275               | 1.1        | 2.2        | 266               | 100.0                          | 0.0                     | 0.0               | 80.8        |
| South Africa (Eastern Cape)        | 2000-2014       | 105                | 0.0              | 0.0        | 0.0        | 105               | 0.0        | 0.0        | 105               | 76.2                           | 23.8                    | 11.4              | 47.6        |
| <b>AMERICA (Central and South)</b> |                 | <b>31,294</b>      | <b>10.4</b>      | <b>1.2</b> | <b>0.3</b> | <b>27,566</b>     | <b>3.5</b> | <b>0.7</b> | <b>26,424</b>     | <b>93.3</b>                    | <b>7.0</b>              | <b>9.2</b>        | <b>2.7</b>  |
| Argentinian registries             | 2002-2013       | 2,231              | 5.4              | 0.9        | 0.4        | 2,082             | 4.8        | 1.1        | 1,959             | 99.0                           | 1.6                     | 0.0               | 0.1         |
| Chubut                             | 2008-2013       | 185                | 63.2             | 0.0        | 0.5        | 67                | 9.0        | 3.0        | 59                | 84.7                           | 15.3                    | 0.0               | 0.0         |
| Córdoba                            | 2004-2012       | 801                | 0.4              | 2.1        | 0.9        | 774               | 5.0        | 1.2        | 726               | 99.3                           | 1.0                     | 0.0               | 0.1         |
| Mendoza                            | 2003-2013       | 1,245              | 0.0              | 0.2        | 0.1        | 1,241             | 4.4        | 1.0        | 1,174             | 99.6                           | 1.3                     | 0.0               | 0.0         |
| Tierra del Fuego                   | -               | -                  | -                | -          | -          | -                 | -          | -          | -                 | -                              | -                       | -                 | -           |
| Argentina (Childhood) †            | -               | -                  | -                | -          | -          | -                 | -          | -          | -                 | -                              | -                       | -                 | -           |
| Brazilian registries               | 2000-2014       | 13,808             | 20.8             | 0.8        | 0.1        | 10,804            | 4.1        | 0.1        | 10,354            | 89.1                           | 11.0                    | 23.2              | 0.0         |
| Aracaju                            | 2000-2012       | 295                | 1.0              | 1.7        | 0.0        | 287               | 3.5        | 1.0        | 274               | 99.3                           | 0.7                     | 0.0               | 0.0         |
| Cuiabá                             | -               | -                  | -                | -          | -          | -                 | -          | -          | -                 | -                              | -                       | -                 | -           |
| Curitiba                           | 2000-2012       | 1,496              | 0.0              | 0.0        | 0.3        | 1,492             | 8.8        | 0.2        | 1,357             | 97.0                           | 3.7                     | 0.0               | 0.0         |
| Goiânia                            | -               | -                  | -                | -          | -          | -                 | -          | -          | -                 | -                              | -                       | -                 | -           |
| Juá                                | 2000-2014       | 175                | 2.3              | 0.6        | 0.0        | 170               | 0.6        | 0.0        | 169               | 98.2                           | 2.4                     | 0.0               | 0.6         |
| São Paulo                          | 2000-2012       | 11,842             | 24.2             | 0.9        | 0.1        | 8,855             | 3.3        | 0.1        | 8,554             | 87.3                           | 12.7                    | 28.1              | 0.0         |
| Chilean registries                 | 2000-2012       | 858                | 0.0              | 0.0        | 0.1        | 857               | 3.6        | 0.2        | 824               | 90.8                           | 6.7                     | 0.0               | 11.2        |
| Antofagasta                        | 2003-2010       | 159                | 0.0              | 0.0        | 0.0        | 159               | 9.4        | 0.6        | 143               | 94.4                           | 6.3                     | 0.0               | 15.4        |
| Biobio                             | 2003-2012       | 216                | 0.0              | 0.0        | 0.0        | 216               | 0.9        | 0.5        | 213               | 87.8                           | 12.2                    | 0.0               | 8.0         |
| Concepción                         | 2006-2010       | 219                | 0.0              | 0.0        | 0.0        | 219               | 5.0        | 0.0        | 208               | 90.4                           | 9.6                     | 0.0               | 11.5        |
| Los Rios                           | 2000-2012       | 264                | 0.0              | 0.0        | 0.4        | 263               | 1.1        | 0.0        | 260               | 91.5                           | 0.0                     | 0.0               | 11.2        |
| Colombian registries               | 2000-2014       | 2,140              | 3.1              | 0.1        | 0.6        | 2,059             | 1.4        | 2.0        | 1,990             | 93.3                           | 6.3                     | 0.0               | 22.3        |
| Bucaramanga                        | -               | -                  | -                | -          | -          | -                 | -          | -          | -                 | -                              | -                       | -                 | -           |
| Cali                               | 2000-2014       | 1,684              | 2.0              | 0.0        | 0.7        | 1,639             | 1.3        | 2.0        | 1,586             | 93.5                           | 5.5                     | 0.0               | 25.8        |
| Manizales                          | 2003-2012       | 292                | 8.6              | 0.0        | 0.0        | 267               | 0.7        | 3.4        | 256               | 91.4                           | 10.2                    | 0.0               | 13.7        |
| Pasto                              | 2000-2012       | 164                | 4.3              | 1.8        | 0.6        | 153               | 3.3        | 0.0        | 148               | 93.9                           | 8.1                     | 0.0               | 0.0         |
| Costa Rica *                       | 2002-2014       | 2,077              | 0.0              | 0.0        | 0.4        | 2,069             | 5.9        | 1.0        | 1,926             | 89.3                           | 15.0                    | 0.0               | 0.0         |
| Cuba *                             | -               | -                  | -                | -          | -          | -                 | -          | -          | -                 | -                              | -                       | -                 | -           |
| Ecuadorian registries              | 2000-2013       | 1,854              | 7.2              | 1.1        | 0.3        | 1,694             | 2.1        | 2.1        | 1,622             | 96.4                           | 4.3                     | 0.2               | 2.7         |
| Cuenca                             | 2000-2012       | 140                | 32.1             | 1.4        | 0.7        | 92                | 3.3        | 1.1        | 88                | 97.7                           | 2.3                     | 0.0               | 27.3        |
| Guayaquil                          | 2005-2013       | 605                | 0.2              | 1.2        | 0.3        | 595               | 0.8        | 5.9        | 555               | 96.4                           | 4.1                     | 0.0               | 0.0         |
| Loja                               | 2000-2013       | 81                 | 0.0              | 2.5        | 1.2        | 78                | 0.0        | 0.0        | 78                | 93.6                           | 6.4                     | 5.1               | 0.0         |
| Manabí                             | 2000-2013       | 263                | 8.7              | 0.8        | 0.4        | 237               | 3.8        | 0.0        | 228               | 96.9                           | 3.1                     | 0.0               | 0.4         |
| Quito                              | 2000-2013       | 765                | 8.5              | 1.0        | 0.0        | 692               | 2.7        | 0.0        | 673               | 96.4                           | 4.8                     | 0.0               | 2.7         |
| Guadeloupe *                       | 2008-2013       | 228                | 0.0              | 7.9        | 0.0        | 210               | 0.0        | 0.0        | 210               | 100.0                          | 0.0                     | 0.0               | 51.4        |
| Martinique *                       | 2000-2012       | 435                | 0.0              | 0.0        | 0.0        | 435               | 0.0        | 2.8        | 423               | 97.6                           | 0.7                     | 7.8               | 0.0         |
| Mexico (Childhood) †               | -               | -                  | -                | -          | -          | -                 | -          | -          | -                 | -                              | -                       | -                 | -           |
| Peru (Lima)                        | 2010-2012       | 1,061              | 0.0              | 0.0        | 1.6        | 1,044             | 4.8        | 0.2        | 992               | 96.6                           | 0.4                     | 0.0               | 3.2         |
| Puerto Rico *                      | 2000-2011       | 4,186              | 1.4              | 3.8        | 0.5        | 3,952             | 0.8        | 1.0        | 3,882             | 99.7                           | 0.9                     | 0.0               | 0.0         |
| Uruguay *                          | 2008-2012       | 2,416              | 0.0              | 2.1        | 0.2        | 2,360             | 4.9        | 0.1        | 2,242             | 95.7                           | 4.6                     | 0.0               | 0.0         |
| <b>AMERICA (North)</b>             |                 | <b>507,522</b>     | <b>0.3</b>       | <b>7.3</b> | <b>0.3</b> | <b>467,220</b>    | <b>0.6</b> | <b>0.6</b> | <b>461,707</b>    | <b>99.3</b>                    | <b>1.1</b>              | <b>1.3</b>        | <b>0.0</b>  |
| Canadian registries                | 2000-2014       | 64,286             | 0.1              | 3.9        | 0.2        | 61,592            | 0.6        | 0.4        | 60,958            | 98.2                           | 1.9                     | 0.0               | 0.0         |
| Alberta                            | 2000-2014       | 7,733              | 0.1              | 5.6        | 0.3        | 7,264             | 0.2        | 0.3        | 7,229             | 99.3                           | 0.8                     | 0.0               | 0.0         |
| British Columbia                   | 2000-2014       | 12,403             | 0.1              | 4.9        | 0.6        | 11,711            | 0.6        | 0.5        | 11,578            | 99.4                           | 0.6                     | 0.0               | 0.0         |
| Manitoba                           | 2000-2014       | 3,893              | 0.1              | 14.4       | 0.1        | 3,325             | 0.7        | 0.2        | 3,297             | 98.8                           | 1.5                     | 0.0               | 0.0         |
| New Brunswick                      | 2000-2014       | 2,057              | 0.1              | 11.5       | 0.1        | 1,816             | 0.1        | 0.1        | 1,813             | 98.1                           | 0.1                     | 0.0               | 0.0         |
| Newfoundland & Labrador            | 2000-2014       | 2,030              | 0.5              | 6.0        | 0.7        | 1,884             | 0.5        | 0.1        | 1,873             | 99.3                           | 0.8                     | 0.0               | 0.0         |
| Nova Scotia                        | 2000-2014       | 3,388              | 0.3              | 5.9        | 0.2        | 3,171             | 0.3        | 0.2        | 3,157             | 97.5                           | 2.9                     | 0.0               | 0.0         |
| Ontario                            | 2000-2014       | 29,115             | 0.0              | 0.0        | 0.0        | 29,115            | 0.7        | 0.6        | 28,730            | 97.3                           | 2.9                     | 0.0               | 0.0         |
| Prince Edward Island               | 2000-2014       | 479                | 0.0              | 13.8       | 0.4        | 411               | 0.2        | 0.0        | 410               | 97.1                           | 2.9                     | 0.0               | 0.0         |
| Saskatchewan                       | 2000-2014       | 3,188              | 0.0              | 8.8        | 0.4        | 2,895             | 0.8        | 0.0        | 2,871             | 99.3                           | 0.7                     | 0.0               | 0.0         |
| US registries                      | 2000-2014       | 443,236            | 0.3              | 7.8        | 0.4        | 405,628           | 0.6        | 0.6        | 400,749           | 99.4                           | 0.9                     | 1.5               | 0.0         |
| Alabama                            | 2000-2014       | 8,671              | 0.4              | 7.2        | 0.2        | 7,995             | 0.5        | 0.8        | 7,892             | 99.2                           | 1.1                     | 0.0               | 0.0         |
| Alaska                             | 2000-2013       | 975                | 1.4              | 6.2        | 0.0        | 901               | 0.1        | 0.9        | 892               | 98.7                           | 1.9                     | 0.0               | 0.0         |
| Arkansas                           | 2000-2011       | 4,370              | 0.1              | 4.7        | 0.2        | 4,152             | 0.4        | 0.9        | 4,100             | 99.8                           | 0.4                     | 0.0               | 0.0         |
| California                         | 2000-2011       | 50,401             | 0.8              | 12.1       | 0.5        | 43,669            | 0.3        | 1.0        | 43,121            | 99.6                           | 0.5                     | 0.0               | 0.0         |
| Greater Bay Area                   | 2000-2014       | 13,624             | 0.4              | 21.9       | 0.6        | 10,491            | 0.4        | 0.8        | 10,373            | 99.6                           | 0.5                     | 7.0               | 0.0         |
| Greater California                 | 2000-2014       | 33,713             | 0.8              | 8.9        | 0.4        | 30,335            | 0.3        | 0.9        | 29,944            | 99.5                           | 0.7                     | 7.0               | 0.0         |
| Los Angeles                        | 2000-2014       | 16,803             | 1.1              | 11.6       | 0.5        | 14,591            | 0.2        | 0.9        | 14,428            | 99.7                           | 0.5                     | 13.4              | 0.0         |
| Colorado                           | 2000-2013       | 6,846              | 0.1              | 8.2        | 0.3        | 6,257             | 1.2        | 0.7        | 6,137             | 99.2                           | 0.9                     | 0.0               | 0.0         |
| Connecticut                        | 2000-2014       | 7,542              | 0.1              | 10.2       | 0.5        | 6,728             | 0.4        | 0.7        | 6,655             | 99.6                           | 0.6                     | 3.7               | 0.0         |
| Delaware                           | 2000-2014       | 1,651              | 0.1              | 6.2        | 0.3        | 1,543             | 0.8        | 0.5        | 1,523             | 99.7                           | 0.3                     | 0.0               | 0.0         |
| Florida                            | 2000-2013       | 33,822             | 0.0              | 7.4        | 0.3        | 31,199            | 0.9        | 0.6        | 30,736            | 99.5                           | 1.6                     | 0.0               | 0.0         |
| Georgia                            | 2000-2014       | 15,537             | 0.0              | 6.1        | 0.4        | 14,518            | 0.4        | 0.5        | 14,387            | 99.6                           | 0.7                     | 0.0               | 0.0         |
| Atlanta                            | 2000-2014       | 4,677              | 0.0              | 7.2        | 0.7        | 4,305             | 0.3        | 0.5        | 4,271             | 99.6                           | 0.7                     | 0.0               | 0.0         |
| Hawaii                             | 2000-2014       | 2,987              | 0.0              | 7.0        | 0.7        | 2,755             | 0.3        | 0.2        | 2,740             | 99.6                           | 0.6                     | 4.0               | 0.0         |
| Idaho                              | 2000-2014       | 2,420              | 0.1              | 3.1        | 0.4        | 2,333             | 0.3        | 0.7        | 2,308             | 99.6                           | 0.5                     | 0.0               | 0.0         |
| Indiana                            | 2000-2014       | 12,860             | 0.1              | 7.7        | 0.3        | 11,819            | 0.4        | 0.6        | 11,699            | 99.5                           | 0.7                     | 0.0               | 0.0         |
| Iowa                               | 2000-2014       | 6,424              | 0.2              | 4.9        | 0.3        | 6,075             | 0.3        | 0.8        | 6,006             | 99.5                           | 0.7                     | 1.9               | 0.0         |
| Kentucky                           | 2000-2014       | 10,294             | 0.0              | 9.9        | 0.2        | 9,256             | 0.2        | 0.5        | 9,193             | 99.4                           | 0.7                     | 1.4               | 0.0         |
| Louisiana                          | 2000-2014       | 9,407              | 0.1              | 6.3        | 0.4        | 8,771             | 0.3        | 0.5        | 8,694             | 99.6                           | 0.6                     | 2.3               | 0.0         |
| Maine                              | 2000-2013       | 2,834              | 0.0              | 7.3        | 0.3        | 2,619             | 0.8        | 0.5        | 2,586             | 99.3                           | 0.7                     | 0.0               | 0.0         |
| Massachusetts                      | 2000-2009       | 9,347              | 0.0              | 10.0       | 0.4        | 8,373             | 0.6        | 0.5        | 8,281             | 99.2                           | 1.0                     | 0.0               | 0.0         |
| Michigan                           | 2000-2013       | 17,002             | 0.2              | 5.0        | 0.4        | 16,062            | 0.4        | 0.7        | 15,889            | 99.1                           | 1.2                     | 0.0               | 0.0         |

Web-table 2.4: Data quality indicators, patients diagnosed during 2000-2014, by continent, country and registry: RECTUM

|                     | Calendar period | Patients submitted | Ineligible (%) ¶ |            |            | Excluded (%) ¶¶   |            |            | Patients included | Data quality indicators (%) †† |                         |                   |            |
|---------------------|-----------------|--------------------|------------------|------------|------------|-------------------|------------|------------|-------------------|--------------------------------|-------------------------|-------------------|------------|
|                     |                 |                    | Incomplete dates | In situ    | Other      | Eligible patients | DCO        | Other      |                   | MV                             | Non-specific morphology | Lost to follow-up | Censored   |
| Detroit             | 2000-2014       | 7,563              | 0.2              | 5.1        | 0.3        | 7,140             | 0.4        | 0.4        | 7,090             | 99.8                           | 0.3                     | 2.8               | 0.1        |
| Minnesota           | 2000-2013       | 8,787              | 0.0              | 5.8        | 0.4        | 8,247             | 0.7        | 0.7        | 8,127             | 100.0                          | 0.1                     | 0.0               | 0.0        |
| Mississippi         | 2002-2014       | 4,932              | 0.2              | 5.9        | 0.3        | 4,615             | 0.5        | 0.7        | 4,562             | 99.6                           | 0.6                     | 0.0               | 0.0        |
| Missouri            | -               | -                  | -                | -          | -          | -                 | -          | -          | -                 | -                              | -                       | -                 | -          |
| Montana             | 2000-2014       | 1,979              | 0.6              | 4.4        | 0.1        | 1,877             | 0.7        | 0.5        | 1,854             | 99.5                           | 0.6                     | 0.0               | 0.0        |
| Nebraska            | 2000-2014       | 3,717              | 0.2              | 5.0        | 0.4        | 3,509             | 0.4        | 0.6        | 3,473             | 99.5                           | 0.6                     | 0.0               | 0.1        |
| New Hampshire       | 2000-2014       | 2,747              | 0.1              | 10.2       | 0.2        | 2,456             | 0.7        | 0.5        | 2,426             | 99.0                           | 1.1                     | 0.0               | 0.0        |
| New Jersey          | 2000-2014       | 17,709             | 0.4              | 9.3        | 0.4        | 15,927            | 0.4        | 0.6        | 15,771            | 99.5                           | 0.8                     | 30.3              | 0.0        |
| New Mexico          | 2000-2014       | 3,364              | 0.0              | 5.9        | 0.3        | 3,156             | 1.2        | 0.4        | 3,104             | 99.5                           | 1.0                     | 3.8               | 0.3        |
| New York            | 2000-2014       | 38,270             | 0.9              | 8.5        | 0.4        | 34,507            | 0.4        | 0.6        | 34,176            | 99.5                           | 0.7                     | 0.0               | 0.0        |
| New York City       | 2000-2014       | 14,805             | 1.4              | 8.0        | 0.6        | 13,327            | 0.3        | 0.7        | 13,188            | 99.7                           | 0.5                     | 0.0               | 0.0        |
| North Carolina      | 2000-2014       | 16,496             | 0.0              | 7.9        | 0.3        | 15,143            | 0.7        | 0.6        | 14,956            | 99.5                           | 0.8                     | 0.0               | 0.0        |
| Ohio                | 2000-2014       | 23,065             | 0.0              | 6.8        | 0.3        | 21,423            | 1.0        | 0.5        | 21,097            | 99.4                           | 0.9                     | 0.0               | 0.0        |
| Oklahoma            | 2000-2010       | 4,941              | 0.1              | 6.8        | 0.3        | 4,583             | 0.7        | 0.5        | 4,529             | 99.5                           | 1.1                     | 0.0               | 0.0        |
| Oregon              | 2000-2013       | 6,724              | 0.1              | 5.8        | 0.3        | 6,303             | 0.8        | 0.4        | 6,225             | 99.0                           | 1.3                     | 0.0               | 0.0        |
| Pennsylvania        | 2000-2014       | 29,710             | 0.4              | 10.2       | 0.3        | 26,460            | 0.6        | 0.6        | 26,148            | 99.5                           | 0.7                     | 0.0               | 0.0        |
| Rhode Island        | 2000-2014       | 2,245              | 0.1              | 8.3        | 0.3        | 2,051             | 0.5        | 0.9        | 2,023             | 99.2                           | 1.0                     | 0.0               | 0.0        |
| South Carolina      | 2000-2014       | 8,238              | 0.0              | 6.6        | 0.2        | 7,671             | 0.6        | 0.5        | 7,588             | 98.9                           | 1.4                     | 0.0               | 0.0        |
| Tennessee           | 2000-2011       | 8,659              | 0.2              | 5.6        | 0.3        | 8,129             | 0.8        | 0.6        | 8,021             | 99.5                           | 0.8                     | 0.0               | 0.0        |
| Texas               | 2000-2013       | 32,473             | 0.5              | 5.4        | 0.4        | 30,420            | 0.9        | 0.6        | 29,968            | 98.8                           | 2.4                     | 0.0               | 0.0        |
| Utah                | 2000-2014       | 3,086              | 0.1              | 7.8        | 0.4        | 2,829             | 0.2        | 0.6        | 2,806             | 99.5                           | 0.6                     | 4.7               | 0.1        |
| Vermont             | 2000-2013       | 1,199              | 0.0              | 5.6        | 0.1        | 1,131             | 0.9        | 0.5        | 1,115             | 99.6                           | 0.6                     | 0.0               | 0.0        |
| Washington          | 2000-2008       | 6,594              | 0.2              | 4.4        | 0.6        | 6,256             | 0.3        | 0.5        | 6,207             | 99.4                           | 0.7                     | 0.0               | 0.0        |
| Seattle             | 2000-2014       | 8,486              | 0.1              | 10.7       | 0.5        | 7,523             | 0.2        | 0.4        | 7,477             | 99.5                           | 0.5                     | 1.8               | 0.0        |
| West Virginia       | 2000-2014       | 4,696              | 0.2              | 6.2        | 0.4        | 4,378             | 0.4        | 0.7        | 4,332             | 99.3                           | 0.9                     | 0.0               | 0.0        |
| Wisconsin           | 2000-2013       | 9,399              | 0.3              | 6.1        | 0.3        | 8,763             | 0.9        | 0.5        | 8,642             | 99.4                           | 0.8                     | 0.0               | 0.0        |
| Wyoming             | 2000-2013       | 816                | 0.0              | 5.6        | 0.1        | 769               | 0.1        | 1.0        | 760               | 99.9                           | 0.7                     | 0.0               | 0.0        |
| <b>ASIA</b>         |                 | <b>396,875</b>     | <b>0.7</b>       | <b>4.1</b> | <b>0.1</b> | <b>377,455</b>    | <b>3.8</b> | <b>0.3</b> | <b>361,987</b>    | <b>95.4</b>                    | <b>6.5</b>              | <b>0.6</b>        | <b>0.9</b> |
| Chinese registries  | 2003-2013       | 31,889             | 0.3              | 0.0        | 0.1        | 31,757            | 0.8        | 0.0        | 31,498            | 86.6                           | 19.7                    | 4.5               | 0.1        |
| Beijing             | 2003-2013       | 11,802             | 0.1              | 0.0        | 0.0        | 11,792            | 0.7        | 0.0        | 11,708            | 87.6                           | 12.5                    | 9.2               | 0.3        |
| Changle             | 2003-2013       | 497                | 5.4              | 0.0        | 0.2        | 469               | 0.0        | 1.1        | 464               | 79.7                           | 28.0                    | 3.0               | 0.0        |
| Cixian              | 2003-2013       | 394                | 0.0              | 0.0        | 0.0        | 394               | 1.8        | 0.0        | 387               | 85.0                           | 15.0                    | 0.0               | 0.0        |
| Dafeng              | 2003-2013       | 749                | 0.0              | 0.0        | 0.0        | 749               | 0.1        | 0.0        | 748               | 89.7                           | 31.7                    | 0.0               | 0.0        |
| Dalian              | 2003-2013       | 4,558              | 0.0              | 0.0        | 0.0        | 4,558             | 2.2        | 0.0        | 4,459             | 94.0                           | 8.2                     | 0.0               | 0.1        |
| Donghai             | 2003-2013       | 595                | 0.0              | 0.0        | 0.0        | 595               | 2.7        | 0.0        | 579               | 60.1                           | 40.4                    | 5.9               | 0.0        |
| Feicheng            | 2003-2013       | 766                | 0.0              | 0.3        | 0.0        | 764               | 0.4        | 0.0        | 761               | 78.8                           | 22.1                    | 3.8               | 0.0        |
| Ganyu               | 2003-2013       | 904                | 0.0              | 0.0        | 0.0        | 904               | 0.1        | 0.0        | 903               | 40.3                           | 62.6                    | 2.2               | 0.1        |
| Guanyun             | 2004-2013       | 594                | 0.0              | 0.0        | 0.0        | 594               | 1.0        | 0.0        | 588               | 76.4                           | 62.9                    | 3.4               | 0.0        |
| Haimen              | 2003-2013       | 1,684              | 0.0              | 0.0        | 0.2        | 1,680             | 0.6        | 0.0        | 1,670             | 90.5                           | 9.5                     | 0.6               | 0.0        |
| Haining             | 2003-2013       | 753                | 0.0              | 0.0        | 0.1        | 752               | 0.1        | 0.0        | 751               | 95.9                           | 29.8                    | 0.3               | 0.0        |
| Jianhu              | 2003-2013       | 827                | 0.0              | 0.0        | 0.0        | 827               | 0.0        | 0.0        | 827               | 88.3                           | 80.3                    | 5.2               | 0.0        |
| Jiashan             | 2003-2013       | 740                | 0.0              | 0.4        | 0.5        | 733               | 0.3        | 0.0        | 731               | 97.4                           | 2.7                     | 0.4               | 0.0        |
| Jintan              | 2004-2013       | 577                | 0.0              | 0.0        | 0.0        | 577               | 0.7        | 0.0        | 573               | 46.2                           | 53.8                    | 2.6               | 0.0        |
| Lianyungang         | 2008-2013       | 508                | 0.0              | 0.0        | 0.0        | 508               | 0.0        | 0.0        | 508               | 84.3                           | 32.5                    | 18.3              | 0.0        |
| Linzhou             | 2003-2013       | 850                | 0.0              | 0.0        | 0.1        | 849               | 0.7        | 0.0        | 843               | 87.7                           | 12.3                    | 0.0               | 0.0        |
| Qidong              | 2003-2013       | 2,103              | 0.0              | 0.0        | 0.0        | 2,103             | 0.0        | 0.0        | 2,102             | 92.2                           | 7.8                     | 1.0               | 0.0        |
| Sihui               | 2003-2013       | 412                | 1.5              | 0.0        | 0.0        | 406               | 3.2        | 0.0        | 393               | 72.3                           | 47.6                    | 1.3               | 0.5        |
| Taixing             | 2003-2013       | 606                | 11.1             | 0.0        | 0.2        | 538               | 0.0        | 0.0        | 538               | 95.2                           | 33.8                    | 5.8               | 0.0        |
| Yangzhong           | 2003-2013       | 393                | 0.0              | 0.0        | 0.0        | 393               | 0.0        | 0.0        | 393               | 91.1                           | 93.4                    | 0.0               | 0.3        |
| Zhongshan           | 2003-2013       | 1,577              | 0.0              | 0.1        | 0.3        | 1,572             | 0.0        | 0.0        | 1,572             | 95.9                           | 5.4                     | 0.1               | 0.1        |
| Cyprus *            | 2004-2014       | 828                | 0.7              | 1.3        | 0.1        | 810               | 1.9        | 0.9        | 788               | 99.7                           | 0.3                     | 0.0               | 35.9       |
| Hong Kong *         | 2005-2014       | 13,466             | 4.0              | 0.0        | 0.1        | 12,921            | 0.4        | 0.1        | 12,856            | 96.9                           | 0.0                     | 5.0               | 0.0        |
| Indian registries   | 2000-2014       | 192                | 0.0              | 0.0        | 0.0        | 192               | 0.5        | 0.0        | 191               | 92.1                           | 9.4                     | 0.0               | 0.0        |
| Guwahati            | -               | -                  | -                | -          | -          | -                 | -          | -          | -                 | -                              | -                       | -                 | -          |
| Karunagappally      | 2000-2014       | 192                | 0.0              | 0.0        | 0.0        | 192               | 0.5        | 0.0        | 191               | 92.1                           | 9.4                     | 0.0               | 0.0        |
| Iran (Golestan)     | 2006-2007       | 58                 | 0.0              | 0.0        | 0.0        | 58                | 0.0        | 0.0        | 58                | 89.7                           | 10.3                    | 12.1              | 0.0        |
| Israel *            | 2000-2013       | 10,063             | 0.0              | 3.4        | 0.7        | 9,649             | 2.3        | 0.3        | 9,401             | 98.5                           | 1.7                     | 0.0               | 0.0        |
| Japanese registries | 2000-2014       | 130,316            | 1.1              | 9.4        | 0.3        | 116,356           | 11.6       | 0.1        | 102,776           | 94.6                           | 10.0                    | 0.0               | 2.0        |
| Aichi               | 2003-2013       | 20,343             | 0.2              | 9.2        | 0.3        | 18,361            | 9.6        | 0.0        | 16,605            | 97.4                           | 4.0                     | 0.0               | 2.3        |
| Akita               | 2010-2014       | 2,329              | 0.8              | 11.8       | 0.6        | 2,022             | 0.0        | 4.6        | 1,929             | 92.7                           | 10.5                    | 0.0               | 45.4       |
| Ehime               | 2007-2013       | 3,149              | 0.1              | 11.8       | 0.8        | 2,750             | 14.0       | 0.0        | 2,364             | 95.8                           | 6.2                     | 0.0               | 0.0        |
| Fukui               | 2003-2009       | 1,677              | 0.2              | 10.6       | 0.3        | 1,491             | 1.9        | 0.0        | 1,462             | 95.6                           | 5.8                     | 0.0               | 2.1        |
| Gunma               | 2003-2012       | 5,574              | 18.3             | 7.4        | 0.1        | 4,133             | 21.7       | 0.0        | 3,237             | 93.9                           | 3.5                     | 0.0               | 1.7        |
| Hiroshima           | 2004-2008       | 5,155              | 0.2              | 18.8       | 0.6        | 4,147             | 3.9        | 0.0        | 3,986             | 99.6                           | 0.5                     | 0.0               | 0.3        |
| Hyogo               | 2007-2012       | 8,768              | 1.0              | 11.0       | 0.4        | 7,678             | 23.5       | 0.0        | 5,870             | 96.5                           | 5.8                     | 0.0               | 1.3        |
| Ibaraki             | 2006-2012       | 5,960              | 0.5              | 10.9       | 0.2        | 5,270             | 15.2       | 0.0        | 4,468             | 93.2                           | 17.2                    | 0.0               | 1.4        |
| Kanagawa            | 2000-2013       | 29,070             | 0.0              | 6.1        | 0.1        | 27,290            | 16.0       | 0.1        | 22,909            | 93.1                           | 22.7                    | 0.0               | 0.0        |
| Miyagi              | 2000-2010       | 7,994              | 1.2              | 17.2       | 0.0        | 6,520             | 7.5        | 0.0        | 6,030             | 94.8                           | 5.4                     | 0.0               | 1.7        |
| Niigata             | 2000-2013       | 10,657             | 0.1              | 6.9        | 0.3        | 9,881             | 8.0        | 0.0        | 9,086             | 94.2                           | 0.9                     | 0.0               | 0.0        |
| Osaka               | 2000-2008       | 17,699             | 0.0              | 6.2        | 0.2        | 16,566            | 6.5        | 0.0        | 15,486            | 91.7                           | 11.2                    | 0.0               | 2.8        |
| Saga                | 2006-2013       | 1,502              | 0.4              | 10.9       | 0.5        | 1,325             | 9.0        | 0.0        | 1,206             | 94.1                           | 8.3                     | 0.0               | 0.0        |
| Tochigi             | 2006-2013       | 4,642              | 0.7              | 12.0       | 0.3        | 4,042             | 12.1       | 0.0        | 3,553             | 96.2                           | 5.2                     | 0.0               | 0.7        |
| Yamagata            | 2003-2013       | 4,393              | 0.6              | 15.6       | 0.4        | 3,665             | 5.0        | 0.0        | 3,480             | 95.5                           | 6.7                     | 0.0               | 0.5        |
| Yamanashi           | 2008-2012       | 1,404              | 0.5              | 12.5       | 0.5        | 1,215             | 9.1        | 0.0        | 1,105             | 93.9                           | 7.1                     | 0.0               | 0.5        |
| Jordan *            | 2000-2014       | 1,829              | 0.1              | 1.9        | 0.5        | 1,784             | 0.0        | 0.5        | 1,775             | 100.0                          | 0.5                     | 3.8               | 0.0        |
| Korea * ‡           | 2000-2014       | 121,668            | 0.4              | 0.0        | 0.0        | 121,135           | 0.0        | 0.1        | 121,053           | 96.6                           | 4.2                     | 0.0               | 0.0        |
| Kuwait *            | 2000-2013       | 335                | 0.0              | 0.0        | 0.3        | 334               | 1.2        | 0.0        | 330               | 100.0                          | 0.0                     | 0.9               | 0.0        |
| Malaysia (Penang)   | 2000-2013       | 1,161              | 0.3              | 0.0        | 0.0        | 1,158             | 0.4        | 2.3        | 1,126             | 96.6                           | 5.8                     | 0.0               | 11.5       |
| Mongolia *          | -               | -                  | -                | -          | -          | -                 | -          | -          | -                 | -                              | -                       | -                 | -          |
| Qatar *             | 2000-2014       | 288                | 0.0              | 0.3        | 0.3        | 286               | 0.7        | 0.3        | 283               | 99.6                           | 0.7                     | 0.0               | 58.0       |
| Singapore *         | 2000-2014       | 6,360              | 0.0              | 0.8        | 0.6        | 6,270             | 0.4        | 0.1        | 6,241             | 98.4                           | 0.5                     | 0.0               | 0.0        |
| Taiwan *            | 2000-2014       | 60,596             | 0.1              | 5.5        | 0.0        | 57,188            | 0.0        | 0.0        | 57,163            | 98.3                           | 0.3                     | 0.0               | 0.0        |

Web-table 2.4: Data quality indicators, patients diagnosed during 2000-2014, by continent, country and registry: RECTUM

|                                | Calendar period | Patients submitted | Ineligible (%) ¶ |            |            | Excluded (%) ¶¶   |            |            | Patients included | Data quality indicators (%) †† |                         |                   |            |
|--------------------------------|-----------------|--------------------|------------------|------------|------------|-------------------|------------|------------|-------------------|--------------------------------|-------------------------|-------------------|------------|
|                                |                 |                    | Incomplete dates | In situ    | Other      | Eligible patients | DCO        | Other      |                   | MV                             | Non-specific morphology | Lost to follow-up | Censored   |
| Thai registries                | 2000-2014       | 7,733              | 0.0              | 0.0        | 0.2        | 7,714             | 1.3        | 12.1       | 6,679             | 84.6                           | 15.6                    | 0.0               | 2.8        |
| Bangkok                        | 2000-2012       | 3,774              | 0.0              | 0.1        | 0.3        | 3,761             | 2.4        | 24.6       | 2,744             | 80.8                           | 19.2                    | 0.0               | 0.0        |
| Khon Kaen                      | 2000-2014       | 1,072              | 0.0              | 0.0        | 0.0        | 1,072             | 0.0        | 0.1        | 1,071             | 86.3                           | 14.0                    | 0.0               | 3.3        |
| Lampang                        | 2000-2014       | 834                | 0.0              | 0.0        | 0.1        | 833               | 0.1        | 0.7        | 826               | 91.3                           | 9.2                     | 0.0               | 0.0        |
| Lamphun                        | 2000-2014       | 387                | 0.0              | 0.0        | 0.0        | 387               | 0.0        | 0.0        | 387               | 81.4                           | 18.9                    | 0.0               | 0.0        |
| Lopburi                        | 2000-2014       | 687                | 0.0              | 0.0        | 0.7        | 682               | 1.3        | 0.0        | 673               | 75.9                           | 24.1                    | 0.0               | 20.4       |
| Songkhla                       | 2000-2014       | 979                | 0.0              | 0.0        | 0.0        | 979               | 0.0        | 0.1        | 978               | 95.1                           | 5.5                     | 0.3               | 1.3        |
| Turkish registries             | 2000-2013       | 10,093             | 1.2              | 1.1        | 0.1        | 9,843             | 0.6        | 0.2        | 9,769             | 97.4                           | 4.9                     | 0.1               | 2.8        |
| Ankara                         | 2008-2012       | 2,827              | 0.0              | 0.7        | 0.0        | 2,805             | 0.5        | 0.0        | 2,792             | 99.7                           | 2.7                     | 0.0               | 1.0        |
| Antalya                        | 2006-2012       | 628                | 0.0              | 0.3        | 0.2        | 625               | 0.2        | 0.2        | 623               | 97.9                           | 3.2                     | 0.0               | 1.8        |
| Bursa                          | 2006-2012       | 1,163              | 3.6              | 0.0        | 0.2        | 1,119             | 1.2        | 0.1        | 1,105             | 97.7                           | 5.5                     | 0.0               | 0.0        |
| Edirne                         | 2006-2012       | 204                | 2.5              | 0.0        | 0.0        | 199               | 1.0        | 0.0        | 197               | 95.9                           | 6.1                     | 0.0               | 0.0        |
| Erzurum                        | 2006-2012       | 148                | 0.0              | 0.7        | 0.0        | 147               | 0.0        | 1.4        | 145               | 91.7                           | 11.0                    | 0.0               | 0.7        |
| Eskisehir                      | 2006-2012       | 399                | 0.0              | 0.0        | 0.0        | 399               | 0.5        | 0.0        | 397               | 95.2                           | 0.0                     | 1.5               | 0.8        |
| Izmir                          | 2000-2013       | 3,726              | 2.1              | 2.0        | 0.2        | 3,566             | 0.6        | 0.3        | 3,532             | 96.4                           | 6.3                     | 0.0               | 6.4        |
| Samsun                         | 2006-2012       | 597                | 0.0              | 0.2        | 0.2        | 595               | 0.7        | 0.0        | 591               | 95.4                           | 7.4                     | 1.4               | 0.2        |
| Trabzon                        | 2006-2012       | 401                | 0.0              | 3.0        | 0.2        | 388               | 0.3        | 0.0        | 387               | 96.4                           | 7.8                     | 0.0               | 0.8        |
| <b>EUROPE</b>                  |                 | <b>874,288</b>     | <b>0.1</b>       | <b>4.1</b> | <b>2.1</b> | <b>819,532</b>    | <b>2.0</b> | <b>0.2</b> | <b>801,387</b>    | <b>97.2</b>                    | <b>1.3</b>              | <b>0.8</b>        | <b>2.3</b> |
| Austria *                      | 2000-2014       | 25,467             | 0.0              | 3.9        | 0.1        | 24,443            | 3.9        | 0.5        | 23,360            | 99.0                           | 3.2                     | 0.0               | 0.0        |
| Belarus (Childhood) †          | -               | -                  | -                | -          | -          | -                 | -          | -          | -                 | -                              | -                       | -                 | -          |
| Belgium *                      | 2004-2014       | 32,700             | 0.0              | 15.4       | 0.1        | 27,639            | 0.0        | 0.1        | 27,614            | 99.7                           | 0.3                     | 0.8               | 0.0        |
| Bulgaria *                     | 2000-2014       | 24,011             | 0.0              | 0.0        | 0.0        | 24,011            | 6.2        | 0.0        | 22,511            | 93.2                           | 0.1                     | 0.1               | 0.0        |
| Croatia *                      | 2000-2014       | 16,100             | 0.0              | 0.2        | 0.0        | 16,064            | 4.6        | 0.1        | 15,309            | 88.2                           | 0.2                     | 0.0               | 0.0        |
| Czech Republic *               | 2000-2014       | 38,130             | 0.0              | 4.3        | 3.1        | 35,298            | 0.9        | 0.4        | 34,838            | 96.1                           | 0.3                     | 0.0               | 0.0        |
| Denmark *                      | 2000-2014       | 22,402             | 0.0              | 0.0        | 0.1        | 22,384            | 0.0        | 0.0        | 22,384            | 98.8                           | 3.3                     | 0.1               | 0.0        |
| Estonia *                      | 2000-2012       | 3,169              | 0.0              | 0.4        | 0.1        | 3,152             | 2.6        | 0.3        | 3,062             | 94.7                           | 0.5                     | 0.4               | 0.0        |
| Finland *                      | 2000-2014       | 13,123             | 0.2              | 0.0        | 0.3        | 13,055            | 1.5        | 0.1        | 12,847            | 98.4                           | 0.2                     | 0.1               | 0.0        |
| French registries              | 2000-2010       | 20,171             | 0.2              | 0.0        | 0.0        | 20,129            | 0.0        | 0.6        | 20,018            | 98.7                           | 0.2                     | 1.9               | 0.0        |
| Bas-Rhin                       | 2000-2010       | 1,934              | 0.0              | 0.0        | 0.0        | 1,934             | 0.0        | 0.5        | 1,924             | 99.1                           | 0.1                     | 1.0               | 0.0        |
| Basse Normandie                | -               | -                  | -                | -          | -          | -                 | -          | -          | -                 | -                              | -                       | -                 | -          |
| Burgundy Digestive             | 2000-2010       | 1,883              | 0.0              | 0.0        | 0.1        | 1,882             | 0.0        | 0.0        | 1,882             | 98.3                           | 0.4                     | 1.4               | 0.0        |
| Calvados                       | -               | -                  | -                | -          | -          | -                 | -          | -          | -                 | -                              | -                       | -                 | -          |
| Calvados Digestive             | 2000-2010       | 1,279              | 0.0              | 0.0        | 0.1        | 1,278             | 0.0        | 0.2        | 1,275             | 96.6                           | 0.2                     | 2.1               | 0.0        |
| Côte-d'Or Gynaecologic         | -               | -                  | -                | -          | -          | -                 | -          | -          | -                 | -                              | -                       | -                 | -          |
| Côte-d'Or Haematopoietic       | -               | -                  | -                | -          | -          | -                 | -          | -          | -                 | -                              | -                       | -                 | -          |
| Doubs                          | 2000-2010       | 942                | 0.0              | 0.0        | 0.0        | 942               | 0.0        | 0.1        | 941               | 98.4                           | 0.0                     | 0.7               | 0.0        |
| Finistère                      | 2005-2010       | 1,101              | 0.1              | 0.0        | 0.0        | 1,100             | 0.0        | 0.3        | 1,097             | 98.4                           | 0.3                     | 2.9               | 0.0        |
| Gironde CNS                    | -               | -                  | -                | -          | -          | -                 | -          | -          | -                 | -                              | -                       | -                 | -          |
| Gironde General                | 2005-2010       | 951                | 1.7              | 0.0        | 0.0        | 935               | 0.0        | 0.5        | 930               | 97.7                           | 0.1                     | 3.3               | 0.0        |
| Gironde Haematopoietic         | -               | -                  | -                | -          | -          | -                 | -          | -          | -                 | -                              | -                       | -                 | -          |
| Haut-Rhin                      | 2000-2010       | 1,294              | 0.0              | 0.0        | 0.0        | 1,294             | 0.0        | 0.9        | 1,282             | 99.8                           | 0.0                     | 1.9               | 0.0        |
| Haute-Vienne                   | 2009-2009       | 81                 | 0.0              | 0.0        | 0.0        | 81                | 0.0        | 1.2        | 80                | 97.5                           | 0.0                     | 0.0               | 0.0        |
| Hérault                        | 2000-2010       | 1,837              | 0.0              | 0.0        | 0.1        | 1,836             | 0.0        | 0.5        | 1,827             | 98.7                           | 0.0                     | 2.8               | 0.0        |
| Isère                          | 2000-2010       | 1,833              | 0.0              | 0.0        | 0.1        | 1,832             | 0.0        | 0.8        | 1,817             | 99.0                           | 0.1                     | 1.1               | 0.0        |
| Lille Metro                    | 2008-2010       | 350                | 0.0              | 0.0        | 0.0        | 350               | 0.0        | 0.0        | 350               | 96.9                           | 0.3                     | 1.4               | 0.0        |
| Loire-Atlantique               | 2000-2010       | 3,630              | 0.5              | 0.0        | 0.0        | 3,612             | 0.0        | 1.1        | 3,571             | 99.4                           | 0.3                     | 2.7               | 0.0        |
| Manche                         | 2000-2010       | 1,085              | 0.0              | 0.0        | 0.2        | 1,083             | 0.0        | 0.3        | 1,080             | 99.3                           | 0.1                     | 1.4               | 0.0        |
| Somme                          | 2000-2010       | 1,053              | 0.0              | 0.0        | 0.1        | 1,052             | 0.0        | 0.7        | 1,045             | 98.9                           | 0.7                     | 2.2               | 0.0        |
| Tarn                           | 2000-2010       | 918                | 0.0              | 0.0        | 0.0        | 918               | 0.0        | 0.1        | 917               | 97.6                           | 0.1                     | 0.4               | 0.0        |
| France Childhood Haem †        | -               | -                  | -                | -          | -          | -                 | -          | -          | -                 | -                              | -                       | -                 | -          |
| France Childhood Solid †       | -               | -                  | -                | -          | -          | -                 | -          | -          | -                 | -                              | -                       | -                 | -          |
| German registries              | 2000-2014       | 112,946            | 0.2              | 4.7        | 0.3        | 107,060           | 6.6        | 0.2        | 99,791            | 98.7                           | 0.4                     | 0.3               | 17.3       |
| Brandenburg                    | 2000-2014       | 11,722             | 0.0              | 8.8        | 0.3        | 10,651            | 5.8        | 0.2        | 10,013            | 98.2                           | 0.3                     | 0.0               | 20.6       |
| Bremen                         | 2000-2013       | 3,011              | 0.0              | 13.7       | 0.3        | 2,589             | 2.9        | 0.2        | 2,508             | 98.7                           | 0.2                     | 4.1               | 0.0        |
| Hamburg                        | 2000-2013       | 5,299              | 0.0              | 0.0        | 0.0        | 5,298             | 7.0        | 0.3        | 4,912             | 98.7                           | 1.3                     | 4.3               | 0.0        |
| Lower Saxony                   | 2003-2013       | 23,221             | 1.1              | 0.0        | 0.2        | 22,924            | 7.5        | 0.2        | 21,143            | 99.9                           | 0.1                     | 0.0               | 23.7       |
| Mecklenburg-W. Pomerania       | 2000-2014       | 7,266              | 0.0              | 7.5        | 0.4        | 6,694             | 4.7        | 0.1        | 6,375             | 98.6                           | 0.1                     | 0.0               | 20.7       |
| Rhineland Palatinate           | 2000-2013       | 15,290             | 0.0              | 4.4        | 0.6        | 14,531            | 9.3        | 0.2        | 13,162            | 97.4                           | 0.0                     | 0.0               | 24.4       |
| Saarland                       | 2000-2012       | 4,153              | 0.0              | 1.8        | 0.1        | 4,076             | 1.9        | 0.1        | 3,993             | 99.8                           | 0.5                     | 0.0               | 0.0        |
| Saxony                         | 2000-2014       | 21,196             | 0.0              | 6.3        | 0.4        | 19,779            | 4.3        | 0.1        | 18,916            | 98.0                           | 0.8                     | 0.0               | 19.4       |
| Schleswig-Holstein             | 2000-2012       | 11,285             | 0.0              | 7.2        | 0.4        | 10,435            | 8.4        | 0.4        | 9,517             | 99.5                           | 0.6                     | 0.0               | 0.0        |
| Thuringia                      | 2000-2014       | 10,503             | 0.0              | 3.6        | 0.4        | 10,083            | 8.1        | 0.1        | 9,252             | 98.6                           | 0.2                     | 0.0               | 21.5       |
| Gibraltar *                    | 2001-2010       | 27                 | 22.2             | 0.0        | 0.0        | 21                | 0.0        | 0.0        | 21                | 100.0                          | 0.0                     | 0.0               | 52.4       |
| Greece (National Paediatric) † | -               | -                  | -                | -          | -          | -                 | -          | -          | -                 | -                              | -                       | -                 | -          |
| Iceland *                      | 2000-2014       | 582                | 0.0              | 0.0        | 0.2        | 581               | 0.2        | 0.0        | 580               | 99.3                           | 0.7                     | 0.0               | 0.0        |
| Ireland *                      | 2000-2013       | 9,437              | 0.0              | 2.6        | 0.1        | 9,183             | 0.8        | 0.2        | 9,085             | 97.5                           | 0.5                     | 0.0               | 0.0        |
| Italian registries             | 2000-2014       | 55,284             | 0.0              | 1.6        | 1.3        | 53,677            | 0.5        | 0.4        | 53,226            | 95.0                           | 5.6                     | 0.7               | 0.9        |
| Alto Adige                     | 2000-2010       | 893                | 0.0              | 0.0        | 0.0        | 893               | 0.8        | 0.1        | 885               | 98.0                           | 2.0                     | 0.0               | 0.0        |
| Barletta-Andria-Trani          | 2006-2012       | 311                | 0.0              | 0.0        | 0.0        | 311               | 0.6        | 1.3        | 305               | 97.0                           | 3.6                     | 1.0               | 0.0        |
| Basilicata                     | 2006-2010       | 538                | 0.0              | 0.0        | 0.0        | 538               | 0.0        | 0.2        | 537               | 90.5                           | 9.5                     | 0.4               | 0.9        |
| Bergamo                        | 2007-2012       | 911                | 0.0              | 0.0        | 0.0        | 911               | 0.0        | 0.2        | 909               | 96.9                           | 3.3                     | 0.6               | 0.0        |
| Biella-Vercelli                | 2000-2010       | 708                | 0.0              | 7.6        | 3.2        | 631               | 0.6        | 0.6        | 623               | 96.1                           | 4.2                     | 0.2               | 2.1        |
| Brescia                        | 2000-2008       | 1,206              | 0.0              | 0.0        | 0.0        | 1,206             | 0.0        | 0.5        | 1,200             | 86.8                           | 14.3                    | 0.7               | 0.1        |
| Brindisi                       | 2006-2008       | 172                | 0.0              | 0.0        | 0.0        | 172               | 0.0        | 0.0        | 172               | 91.9                           | 8.1                     | 1.7               | 0.6        |
| Caserta                        | 2008-2010       | 295                | 0.0              | 0.0        | 0.0        | 295               | 0.0        | 0.7        | 293               | 96.9                           | 3.1                     | 1.0               | 4.4        |
| Catania-Messina-Enna           | 2003-2012       | 2,587              | 0.0              | 0.0        | 0.0        | 2,587             | 0.7        | 0.2        | 2,562             | 95.8                           | 7.0                     | 0.0               | 1.4        |
| Catanzaro                      | 2003-2009       | 331                | 0.0              | 0.0        | 0.0        | 331               | 0.0        | 0.3        | 330               | 93.9                           | 6.4                     | 0.0               | 0.6        |
| Como                           | 2003-2011       | 780                | 0.0              | 0.0        | 0.1        | 779               | 0.3        | 0.3        | 775               | 97.7                           | 2.3                     | 0.9               | 0.0        |
| Cremona                        | 2005-2010       | 350                | 0.0              | 0.0        | 0.0        | 350               | 1.4        | 0.0        | 345               | 96.2                           | 3.8                     | 0.6               | 0.0        |
| Ferrara                        | 2000-2011       | 921                | 0.0              | 0.0        | 0.0        | 921               | 0.3        | 0.3        | 915               | 92.9                           | 7.2                     | 1.2               | 0.0        |
| Friuli-Venezia-Giulia          | 2000-2010       | 2,763              | 0.0              | 0.0        | 0.0        | 2,762             | 3.5        | 0.5        | 2,651             | 95.9                           | 4.1                     | 0.3               | 0.0        |
| Genoa                          | 2000-2009       | 2,257              | 0.0              | 8.6        | 0.3        | 2,058             | 0.0        | 0.9        | 2,038             | 94.8                           | 5.3                     | 0.0               | 0.0        |
| Latina                         | 2000-2011       | 868                | 0.0              | 0.0        | 0.0        | 868               | 0.0        | 0.3        | 865               | 89.4                           | 10.9                    | 1.2               | 1.3        |
| Lecce                          | 2003-2008       | 688                | 0.0              | 0.0        | 0.0        | 688               | 0.0        | 0.7        | 683               | 94.7                           | 6.6                     | 0.1               | 1.6        |

Web-table 2.4: Data quality indicators, patients diagnosed during 2000-2014, by continent, country and registry: RECTUM

|                      | Calendar period | Patients submitted | Ineligible (%) ¶ |         |       | Excluded (%) ¶¶   |      |       | Patients included | Data quality indicators (%) †† |                         |                   |          |
|----------------------|-----------------|--------------------|------------------|---------|-------|-------------------|------|-------|-------------------|--------------------------------|-------------------------|-------------------|----------|
|                      |                 |                    | Incomplete dates | In situ | Other | Eligible patients | DCO  | Other |                   | MV                             | Non-specific morphology | Lost to follow-up | Censored |
| Mantova              | 2000-2010       | 855                | 0.0              | 0.0     | 0.0   | 855               | 1.1  | 0.1   | 845               | 92.0                           | 8.8                     | 0.0               | 0.0      |
| Milano               | 2000-2012       | 4,710              | 0.0              | 0.0     | 0.1   | 4,706             | 0.0  | 0.4   | 4,685             | 94.8                           | 5.4                     | 3.7               | 0.3      |
| Modena               | 2000-2012       | 1,715              | 0.0              | 14.1    | 0.2   | 1,470             | 0.0  | 0.1   | 1,468             | 97.9                           | 2.2                     | 0.0               | 1.1      |
| Monza-Brianza        | 2007-2012       | 838                | 0.0              | 0.0     | 0.1   | 837               | 0.0  | 0.1   | 836               | 96.9                           | 3.9                     | 0.1               | 0.0      |
| Naples               | 2000-2012       | 1,005              | 0.0              | 0.0     | 0.0   | 1,005             | 0.0  | 0.5   | 1,000             | 96.8                           | 3.2                     | 1.6               | 2.7      |
| Nuoro                | 2003-2012       | 347                | 0.0              | 0.0     | 0.0   | 347               | 0.0  | 0.3   | 346               | 96.5                           | 4.3                     | 0.3               | 0.0      |
| Palermo              | 2003-2012       | 1,740              | 0.0              | 0.0     | 0.0   | 1,740             | 1.0  | 0.3   | 1,717             | 92.5                           | 7.9                     | 0.3               | 0.0      |
| Parma                | 2000-2014       | 1,043              | 0.0              | 1.5     | 0.4   | 1,023             | 0.3  | 0.5   | 1,015             | 96.8                           | 3.2                     | 1.2               | 0.2      |
| Pavia                | 2003-2009       | 745                | 0.0              | 0.0     | 0.3   | 743               | 0.0  | 1.1   | 735               | 90.5                           | 9.9                     | 0.4               | 0.8      |
| Piacenza             | 2006-2011       | 294                | 0.0              | 0.0     | 0.3   | 293               | 0.0  | 0.0   | 293               | 95.6                           | 4.8                     | 0.3               | 4.4      |
| Ragusa               | 2000-2012       | 876                | 0.0              | 2.1     | 0.0   | 858               | 0.6  | 0.1   | 852               | 95.9                           | 5.6                     | 0.1               | 0.0      |
| Reggio Emilia        | 2000-2012       | 1,039              | 0.0              | 0.0     | 0.1   | 1,038             | 0.0  | 0.4   | 1,034             | 96.1                           | 4.1                     | 0.9               | 0.0      |
| Romagna              | 2000-2012       | 3,095              | 0.0              | 7.5     | 0.1   | 2,861             | 0.1  | 0.3   | 2,847             | 95.8                           | 4.2                     | 0.1               | 0.0      |
| Salerno              | 2000-2009       | 1,220              | 0.0              | 0.0     | 0.0   | 1,220             | 0.0  | 0.3   | 1,216             | 90.0                           | 10.4                    | 0.3               | 3.6      |
| Sassari              | 2000-2011       | 783                | 0.0              | 0.0     | 0.0   | 783               | 1.9  | 0.3   | 766               | 98.3                           | 4.0                     | 0.0               | 0.0      |
| Siracusa             | 2000-2012       | 654                | 0.0              | 0.0     | 0.0   | 654               | 1.2  | 0.2   | 645               | 95.2                           | 6.5                     | 0.0               | 1.7      |
| Sondrio              | 2000-2011       | 317                | 0.0              | 0.0     | 0.0   | 317               | 0.0  | 0.0   | 317               | 95.0                           | 5.7                     | 0.0               | 0.3      |
| Taranto              | 2006-2012       | 521                | 0.0              | 0.0     | 0.0   | 521               | 1.0  | 0.2   | 515               | 96.3                           | 3.9                     | 2.1               | 0.0      |
| Trapani              | 2002-2010       | 482                | 0.0              | 0.0     | 0.0   | 482               | 0.2  | 0.2   | 480               | 92.1                           | 10.4                    | 0.4               | 0.2      |
| Trento               | 2000-2010       | 795                | 0.0              | 0.0     | 0.0   | 795               | 0.4  | 0.5   | 788               | 97.2                           | 5.2                     | 1.3               | 0.0      |
| Turin                | 2000-2012       | 2,557              | 0.0              | 2.0     | 0.2   | 2,501             | 0.7  | 0.4   | 2,473             | 96.4                           | 3.6                     | 1.7               | 0.0      |
| Tuscany              | 2000-2009       | 3,546              | 0.0              | 2.3     | 18.7  | 2,804             | 0.4  | 0.2   | 2,788             | 94.4                           | 7.5                     | 0.0               | 1.7      |
| Umbria               | 2000-2013       | 2,916              | 0.0              | 0.0     | 0.0   | 2,915             | 0.2  | 0.1   | 2,908             | 95.9                           | 4.6                     | 0.1               | 0.1      |
| Varese               | 2000-2012       | 1,844              | 0.0              | 0.0     | 0.1   | 1,843             | 0.1  | 0.3   | 1,836             | 95.6                           | 4.4                     | 0.2               | 0.2      |
| Veneto               | 2000-2009       | 4,467              | 0.0              | 0.0     | 0.0   | 4,465             | 0.2  | 0.4   | 4,439             | 95.6                           | 4.6                     | 0.5               | 1.8      |
| Viterbo              | 2006-2010       | 301                | 0.0              | 0.0     | 0.3   | 300               | 1.7  | 0.3   | 294               | 92.9                           | 7.8                     | 0.0               | 38.8     |
| Piedmont Childhood   | -               | -                  | -                | -       | -     | -                 | -    | -     | -                 | -                              | -                       | -                 | -        |
| Latvia *             | 2000-2014       | 5,802              | 0.0              | 0.0     | 18.0  | 4,758             | 0.0  | 0.2   | 4,748             | 100.0                          | 0.4                     | 0.0               | 0.0      |
| Lithuania *          | 2000-2012       | 8,100              | 0.0              | 0.1     | 0.1   | 8,087             | 4.8  | 0.0   | 7,694             | 88.2                           | 0.5                     | 0.0               | 0.2      |
| Malta *              | 2000-2013       | 810                | 0.0              | 0.5     | 2.2   | 788               | 0.6  | 0.3   | 781               | 97.4                           | 2.7                     | 0.0               | 0.0      |
| Netherlands *        | 2000-2014       | 52,301             | 0.0              | 0.5     | 0.0   | 51,996            | 0.1  | 0.2   | 51,839            | 99.0                           | 1.3                     | 0.4               | 0.0      |
| Norway *             | 2000-2014       | 28,240             | 0.0              | 3.7     | 38.4  | 16,362            | 0.2  | 0.2   | 16,306            | 100.0                          | 0.1                     | 0.2               | 0.0      |
| Poland *             | 2000-2014       | 85,474             | 0.0              | 0.0     | 0.0   | 85,456            | 1.7  | 0.4   | 83,669            | 93.9                           | 0.2                     | 0.0               | 0.0      |
| Greater Poland       | 2000-2014       | 7,704              | 0.0              | 0.0     | 0.0   | 7,704             | 2.9  | 0.4   | 7,454             | 95.5                           | 0.2                     | 0.0               | 0.0      |
| Holy Cross           | 2000-2014       | 3,296              | 0.0              | 0.0     | 0.0   | 3,296             | 1.5  | 0.5   | 3,231             | 96.9                           | 0.6                     | 0.0               | 0.0      |
| Kujavia-Pomerania    | 2000-2014       | 4,649              | 0.0              | 0.0     | 0.0   | 4,648             | 0.7  | 0.3   | 4,605             | 97.7                           | 0.0                     | 0.0               | 0.0      |
| Lesser Poland        | 2000-2014       | 7,299              | 0.0              | 0.0     | 0.0   | 7,299             | 2.8  | 0.3   | 7,078             | 95.1                           | 0.4                     | 0.0               | 0.0      |
| Łódź                 | 2000-2014       | 5,700              | 0.0              | 0.0     | 0.1   | 5,696             | 0.5  | 1.2   | 5,597             | 87.2                           | 0.2                     | 0.0               | 0.0      |
| Lower Silesia        | 2000-2014       | 7,354              | 0.0              | 0.1     | 0.0   | 7,347             | 0.2  | 0.1   | 7,327             | 89.8                           | 0.1                     | 0.3               | 0.0      |
| Lublin               | 2000-2014       | 5,083              | 0.0              | 0.0     | 0.0   | 5,083             | 5.2  | 0.2   | 4,808             | 88.5                           | 0.0                     | 0.0               | 0.0      |
| Lubush               | 2000-2014       | 2,395              | 0.0              | 0.0     | 0.1   | 2,393             | 0.8  | 0.3   | 2,365             | 95.4                           | 0.1                     | 0.0               | 0.0      |
| Mazovia              | 2000-2014       | 10,117             | 0.0              | 0.0     | 0.0   | 10,115            | 0.0  | 0.1   | 10,101            | 94.9                           | 0.1                     | 0.0               | 0.0      |
| Opole                | 2000-2014       | 2,598              | 0.0              | 0.0     | 0.0   | 2,598             | 0.1  | 0.2   | 2,591             | 98.6                           | 0.1                     | 0.0               | 0.0      |
| Podlaha              | 2000-2014       | 2,696              | 0.0              | 0.0     | 0.0   | 2,696             | 3.9  | 0.3   | 2,584             | 92.1                           | 0.3                     | 0.0               | 0.0      |
| Pomerania            | 2000-2014       | 4,867              | 0.0              | 0.0     | 0.0   | 4,865             | 5.1  | 0.3   | 4,600             | 97.6                           | 0.0                     | 0.0               | 0.0      |
| Silesia              | 2000-2014       | 10,676             | 0.0              | 0.0     | 0.0   | 10,676            | 0.7  | 0.3   | 10,572            | 93.5                           | 0.2                     | 0.0               | 0.0      |
| Subcarpathia         | 2000-2014       | 4,697              | 0.0              | 0.0     | 0.0   | 4,697             | 1.2  | 1.7   | 4,563             | 97.0                           | 0.2                     | 0.0               | 0.0      |
| Varmia-Mazuria       | 2000-2014       | 2,849              | 0.0              | 0.0     | 0.0   | 2,849             | 0.2  | 0.2   | 2,836             | 97.8                           | 0.4                     | 0.0               | 0.1      |
| West Pomerania       | 2000-2014       | 3,494              | 0.0              | 0.0     | 0.0   | 3,494             | 3.6  | 0.3   | 3,357             | 89.2                           | 0.0                     | 0.0               | 0.0      |
| Portugal *           | 2000-2014       | 26,800             | 0.9              | 0.8     | 1.2   | 26,025            | 0.0  | 0.1   | 25,989            | 98.4                           | 1.3                     | 1.4               | 0.0      |
| Azores               | 2000-2014       | 349                | 0.0              | 0.0     | 0.0   | 349               | 1.1  | 0.0   | 345               | 98.8                           | 1.2                     | 1.2               | 0.3      |
| Portugal Central     | 2003-2010       | 3,753              | 0.4              | 0.0     | 0.1   | 3,736             | 0.0  | 0.0   | 3,735             | 98.7                           | 1.7                     | 0.6               | 0.0      |
| Portugal North       | 2000-2010       | 7,228              | 3.0              | 0.0     | 0.2   | 7,001             | 0.0  | 0.1   | 6,991             | 98.5                           | 2.2                     | 0.0               | 0.0      |
| Portugal South       | 2000-2014       | 15,470             | 0.0              | 1.4     | 2.0   | 14,939            | 0.0  | 0.1   | 14,918            | 98.3                           | 0.8                     | 2.3               | 0.0      |
| Romania (Cluj)       | 2006-2012       | 758                | 0.0              | 1.7     | 0.3   | 743               | 11.6 | 0.0   | 657               | 92.1                           | 8.1                     | 0.0               | 0.0      |
| Russian registries ‡ | 2000-2014       | 16,523             | 0.0              | 0.2     | 0.0   | 16,477            | 0.6  | 0.4   | 16,305            | 93.0                           | 1.5                     | 2.1               | 1.3      |
| Arkhangelsk          | 2000-2014       | 3,075              | 0.0              | 0.3     | 0.0   | 3,064             | 0.4  | 1.0   | 3,022             | 91.4                           | 1.3                     | 1.1               | 0.0      |
| Karelia              | 2000-2014       | 1,546              | 0.0              | 1.4     | 0.3   | 1,521             | 3.7  | 0.1   | 1,463             | 87.5                           | 3.6                     | 1.0               | 2.6      |
| Omsk                 | 2000-2014       | 2,712              | 0.0              | 0.0     | 0.1   | 2,710             | 0.0  | 0.2   | 2,705             | 99.3                           | 2.4                     | 5.0               | 6.1      |
| Samara               | 2000-2014       | 7,940              | 0.0              | 0.0     | 0.0   | 7,937             | 0.5  | 0.2   | 7,887             | 92.9                           | 1.1                     | 1.7               | 0.0      |
| Tomsk                | 2005-2014       | 1,250              | 0.0              | 0.4     | 0.0   | 1,245             | 0.0  | 1.4   | 1,228             | 90.4                           | 0.0                     | 1.7               | 1.3      |
| Slovakia *           | 2000-2010       | 12,031             | 0.0              | 2.9     | 0.2   | 11,656            | 5.1  | 0.0   | 11,066            | 97.9                           | 2.2                     | 0.0               | 0.0      |
| Slovenia *           | 2000-2013       | 6,787              | 0.0              | 0.0     | 0.2   | 6,776             | 1.4  | 0.0   | 6,682             | 97.7                           | 0.1                     | 0.0               | 0.0      |
| Spanish registries   | 2000-2013       | 20,039             | 0.2              | 7.4     | 0.5   | 18,427            | 0.8  | 0.2   | 18,245            | 97.7                           | 0.8                     | 0.5               | 0.0      |
| Basque Country       | 2000-2013       | 7,073              | 0.0              | 11.6    | 0.1   | 6,243             | 0.5  | 0.2   | 6,197             | 97.4                           | 0.1                     | 0.4               | 0.0      |
| Canaries             | 2000-2011       | 2,527              | 0.0              | 6.3     | 0.3   | 2,361             | 0.8  | 0.3   | 2,335             | 97.9                           | 0.2                     | 0.1               | 0.0      |
| Girona               | 2000-2013       | 2,113              | 0.4              | 14.9    | 0.6   | 1,777             | 1.6  | 0.1   | 1,746             | 98.2                           | 2.5                     | 0.6               | 0.0      |
| Granada              | 2000-2012       | 1,547              | 0.0              | 0.0     | 0.3   | 1,543             | 1.2  | 0.1   | 1,522             | 97.9                           | 0.1                     | 0.3               | 0.0      |
| Mallorca             | 2000-2012       | 1,668              | 1.0              | 5.6     | 0.4   | 1,552             | 0.9  | 0.1   | 1,537             | 98.8                           | 0.1                     | 3.3               | 0.1      |
| Murcia               | 2000-2010       | 2,034              | 0.0              | 0.0     | 0.1   | 2,031             | 0.6  | 0.1   | 2,016             | 97.2                           | 3.6                     | 0.0               | 0.0      |
| Navarra              | 2000-2010       | 1,450              | 0.0              | 2.8     | 0.1   | 1,408             | 0.4  | 0.0   | 1,403             | 97.9                           | 0.2                     | 0.1               | 0.0      |
| Tarragona            | 2000-2011       | 1,627              | 0.7              | 2.7     | 3.6   | 1,512             | 1.3  | 0.2   | 1,489             | 97.2                           | 0.6                     | 0.0               | 0.0      |
| Spain Childhood      | -               | -                  | -                | -       | -     | -                 | -    | -     | -                 | -                              | -                       | -                 | -        |
| Valencia Childhood   | -               | -                  | -                | -       | -     | -                 | -    | -     | -                 | -                              | -                       | -                 | -        |
| Sweden *             | 2000-2014       | 38,280             | 0.0              | 20.6    | 0.9   | 30,058            | 0.7  | 0.2   | 29,777            | 99.5                           | 0.5                     | 0.1               | 0.0      |
| Swiss registries     | 2000-2014       | 9,837              | 0.0              | 5.7     | 5.6   | 8,730             | 0.7  | 0.4   | 8,633             | 98.9                           | 0.6                     | 4.9               | 3.4      |
| Basel                | 2000-2011       | 519                | 0.0              | 0.0     | 0.8   | 515               | 0.2  | 5.2   | 487               | 100.0                          | 0.2                     | 0.4               | 9.2      |
| Fribourg             | 2006-2014       | 360                | 0.0              | 10.0    | 0.6   | 322               | 0.0  | 1.2   | 318               | 98.4                           | 1.6                     | 1.9               | 0.0      |
| Geneva               | 2000-2013       | 1,124              | 0.0              | 16.3    | 2.2   | 916               | 1.0  | 0.0   | 907               | 99.3                           | 1.0                     | 6.5               | 0.0      |
| Graubünden-Glarus    | 2000-2014       | 547                | 0.0              | 0.0     | 0.4   | 545               | 0.4  | 0.0   | 543               | 98.3                           | 0.0                     | 44.2              | 0.0      |
| Neuchâtel            | 2000-2014       | 1,025              | 0.0              | 0.8     | 49.1  | 514               | 0.4  | 0.0   | 512               | 98.6                           | 0.4                     | 2.3               | 4.3      |
| St Gallen-Appenzell  | 2000-2014       | 1,327              | 0.0              | 0.0     | 0.2   | 1,325             | 0.1  | 0.1   | 1,323             | 98.3                           | 0.0                     | 2.8               | 0.0      |
| Ticino               | 2000-2014       | 1,229              | 0.0              | 10.8    | 0.1   | 1,095             | 0.3  | 0.0   | 1,092             | 99.5                           | 0.5                     | 2.0               | 0.0      |
| Valais               | 2000-2014       | 742                | 0.0              | 13.1    | 0.0   | 645               | 0.2  | 0.2   | 643               | 97.4                           | 0.0                     | 1.2               | 0.0      |

Web-table 2.4: Data quality indicators, patients diagnosed during 2000-2014, by continent, country and registry: RECTUM

|                              | Calendar period | Patients submitted | Ineligible (%) ¶ |            |            | Eligible patients | Excluded (%) ¶¶ |            | Patients included | Data quality indicators (%) †† |                         |                   |            |
|------------------------------|-----------------|--------------------|------------------|------------|------------|-------------------|-----------------|------------|-------------------|--------------------------------|-------------------------|-------------------|------------|
|                              |                 |                    | Incomplete dates | In situ    | Other      |                   | DCO             | Other      |                   | MV                             | Non-specific morphology | Lost to follow-up | Censored   |
| Zürich                       | 2000-2013       | 2,964              | 0.0              | 3.5        | 0.3        | 2,853             | 1.5             | 0.1        | 2,808             | 99.0                           | 1.1                     | 1.4               | 8.0        |
| Switzerland (Childhood) †    | -               | -                  |                  |            |            |                   |                 |            |                   |                                |                         |                   |            |
| United Kingdom *             | 2000-2014       | 188,957            | 0.1              | 5.2        | 1.3        | 176,496           | 1.0             | 0.2        | 174,350           | 98.2                           | 1.7                     | 2.0               | 0.0        |
| England                      | 2000-2014       | 155,343            | 0.1              | 5.5        | 0.5        | 145,759           | 1.1             | 0.2        | 143,871           | 98.6                           | 1.7                     | 2.4               | 0.0        |
| Northern Ireland             | 2000-2014       | 5,097              | 0.0              | 7.4        | 0.1        | 4,710             | 0.4             | 0.1        | 4,684             | 95.4                           | 4.8                     | 0.0               | 0.0        |
| Scotland                     | 2000-2014       | 16,994             | 0.0              | 4.0        | 2.1        | 15,953            | 0.3             | 0.0        | 15,906            | 95.9                           | 0.1                     | 0.1               | 0.0        |
| Wales                        | 2000-2014       | 11,523             | 0.0              | 1.7        | 10.8       | 10,074            | 1.7             | 0.2        | 9,889             | 98.6                           | 1.7                     | 0.0               | 0.0        |
| <b>OCEANIA</b>               |                 | <b>69,341</b>      | <b>0.1</b>       | <b>1.6</b> | <b>0.2</b> | <b>68,044</b>     | <b>0.6</b>      | <b>0.2</b> | <b>67,496</b>     | <b>98.3</b>                    | <b>1.6</b>              | <b>0.0</b>        | <b>0.0</b> |
| Australia *                  | 2000-2014       | 57,937             | 0.2              | 1.9        | 0.2        | 56,640            | 0.5             | 0.2        | 56,260            | 98.5                           | 1.3                     | 0.0               | 0.0        |
| Australian Capital Territory | 2000-2013       | 683                | 0.0              | 2.6        | 1.2        | 657               | 0.3             | 0.3        | 653               | 99.5                           | 0.5                     | 0.0               | 0.0        |
| New South Wales              | 2000-2012       | 17,092             | 0.1              | 0.0        | 0.1        | 17,056            | 0.4             | 0.2        | 16,945            | 99.5                           | 0.7                     | 0.0               | 0.0        |
| Northern Territory           | 2000-2013       | 297                | 0.0              | 0.0        | 0.0        | 297               | 0.0             | 3.0        | 288               | 97.6                           | 0.7                     | 0.0               | 0.0        |
| Queensland                   | 2000-2014       | 12,552             | 0.7              | 5.0        | 0.5        | 11,778            | 0.5             | 0.2        | 11,697            | 99.3                           | 0.8                     | 0.0               | 0.0        |
| South Australia              | 2000-2013       | 4,250              | 0.1              | 0.0        | 0.0        | 4,246             | 0.0             | 0.4        | 4,230             | 96.2                           | 0.4                     | 0.0               | 0.0        |
| Tasmania                     | 2000-2013       | 1,662              | 0.0              | 3.4        | 0.6        | 1,595             | 0.2             | 0.0        | 1,592             | 98.1                           | 2.2                     | 0.0               | 0.0        |
| Victoria                     | 2000-2014       | 16,264             | 0.0              | 2.4        | 0.0        | 15,874            | 0.8             | 0.1        | 15,736            | 97.4                           | 2.7                     | 0.0               | 0.0        |
| Western Australia            | 2000-2014       | 5,137              | 0.0              | 0.0        | 0.0        | 5,137             | 0.2             | 0.1        | 5,119             | 99.0                           | 1.1                     | 0.0               | 0.0        |
| New Zealand *                | 2000-2014       | 11,404             | 0.0              | 0.0        | 0.0        | 11,404            | 1.3             | 0.1        | 11,236            | 97.3                           | 3.0                     | 0.0               | 0.0        |
| <b>Total</b>                 |                 | <b>1,881,039</b>   | <b>0.4</b>       | <b>4.8</b> | <b>1.1</b> | <b>1,761,337</b>  | <b>2.0</b>      | <b>0.4</b> | <b>1,720,488</b>  | <b>97.4</b>                    | <b>2.4</b>              | <b>1.0</b>        | <b>1.3</b> |

Web-table 2.5: Data quality indicators, patients diagnosed during 2000-2014, by continent, country and registry: LIVER

|                                    | Calendar period | Patients submitted | Ineligible (%) ¶ |            |            | Excluded (%) ¶¶   |             |            | Patients included | Data quality indicators (%) †† |                         |                   |             |
|------------------------------------|-----------------|--------------------|------------------|------------|------------|-------------------|-------------|------------|-------------------|--------------------------------|-------------------------|-------------------|-------------|
|                                    |                 |                    | Incomplete dates | In situ    | Other      | Eligible patients | DCO         | Other      |                   | MV                             | Non-specific morphology | Lost to follow-up | Censored    |
| <b>AFRICA</b>                      |                 | <b>1,219</b>       | <b>23.0</b>      | <b>0.0</b> | <b>2.3</b> | <b>911</b>        | <b>3.3</b>  | <b>1.3</b> | <b>869</b>        | <b>92.4</b>                    | <b>9.2</b>              | <b>7.0</b>        | <b>33.3</b> |
| Algerian registries                | 2000-2014       | 327                | 16.5             | 0.0        | 2.8        | 264               | 6.1         | 1.5        | 244               | 92.6                           | 9.8                     | 0.0               | 19.3        |
| Annaba                             | 2000-2014       | 69                 | 2.9              | 0.0        | 7.2        | 62                | 11.3        | 1.6        | 54                | 66.7                           | 0.0                     | 0.0               | 59.3        |
| Sétif                              | 2000-2013       | 196                | 26.5             | 0.0        | 1.0        | 142               | 0.0         | 2.1        | 139               | 100.0                          | 4.3                     | 0.0               | 10.8        |
| Tlemcen                            | 2006-2014       | 62                 | 0.0              | 0.0        | 3.2        | 60                | 15.0        | 0.0        | 51                | 100.0                          | 35.3                    | 0.0               | 0.0         |
| Mali (Bamako)                      | -               | -                  | -                | -          | -          | -                 | -           | -          | -                 | -                              | -                       | -                 | -           |
| Mauritius *                        | 2010-2012       | 33                 | 0.0              | 0.0        | 6.1        | 31                | 0.0         | 12.9       | 27                | 92.6                           | 25.9                    | 0.0               | 0.0         |
| Morocco (Casablanca)               | -               | -                  | -                | -          | -          | -                 | -           | -          | -                 | -                              | -                       | -                 | -           |
| Nigeria (Ibadan)                   | 2005-2014       | 586                | 38.6             | 0.0        | 1.9        | 349               | 4.0         | 0.6        | 333               | 100.0                          | 0.0                     | 0.0               | 44.7        |
| South Africa (Eastern Cape)        | 2000-2014       | 273                | 0.0              | 0.0        | 2.2        | 267               | 0.0         | 0.7        | 265               | 82.6                           | 18.5                    | 23.0              | 35.1        |
| <b>AMERICA (Central and South)</b> |                 | <b>14,402</b>      | <b>2.6</b>       | <b>0.0</b> | <b>1.8</b> | <b>13,768</b>     | <b>32.5</b> | <b>2.0</b> | <b>9,019</b>      | <b>77.3</b>                    | <b>23.7</b>             | <b>0.2</b>        | <b>1.2</b>  |
| Argentinian registries             | 2002-2013       | 1,464              | 2.5              | 0.1        | 1.0        | 1,411             | 30.1        | 1.3        | 968               | 89.0                           | 13.8                    | 0.0               | 0.0         |
| Chubut                             | 2008-2013       | 125                | 29.6             | 0.8        | 0.0        | 87                | 19.5        | 5.7        | 65                | 76.9                           | 24.6                    | 0.0               | 0.0         |
| Córdoba                            | 2004-2012       | 541                | 0.0              | 0.0        | 1.1        | 535               | 29.5        | 0.6        | 374               | 85.3                           | 20.9                    | 0.0               | 0.0         |
| Mendoza                            | 2003-2013       | 798                | 0.0              | 0.0        | 1.1        | 789               | 31.7        | 1.3        | 529               | 93.2                           | 7.6                     | 0.0               | 0.0         |
| Tierra del Fuego                   | -               | -                  | -                | -          | -          | -                 | -           | -          | -                 | -                              | -                       | -                 | -           |
| Argentina (Childhood) †            | -               | -                  | -                | -          | -          | -                 | -           | -          | -                 | -                              | -                       | -                 | -           |
| Brazilian registries               | 2000-2014       | 1,639              | 1.5              | 0.0        | 1.2        | 1,595             | 42.3        | 3.9        | 858               | 89.6                           | 14.1                    | 0.0               | 0.0         |
| Aracaju                            | 2000-2012       | 274                | 0.4              | 0.0        | 1.5        | 269               | 49.1        | 0.4        | 136               | 82.4                           | 21.3                    | 0.0               | 0.0         |
| Cuiabá                             | -               | -                  | -                | -          | -          | -                 | -           | -          | -                 | -                              | -                       | -                 | -           |
| Curitiba                           | 2000-2012       | 847                | 0.0              | 0.0        | 0.9        | 839               | 42.7        | 0.7        | 475               | 91.2                           | 10.3                    | 0.0               | 0.0         |
| Goiânia                            | 2000-2012       | 488                | 4.7              | 0.0        | 1.6        | 457               | 40.0        | 12.3       | 218               | 91.7                           | 17.4                    | 0.0               | 0.0         |
| Jaú                                | 2000-2014       | 30                 | 0.0              | 0.0        | 0.0        | 30                | 3.3         | 0.0        | 29                | 82.8                           | 17.2                    | 0.0               | 0.0         |
| São Paulo                          | -               | -                  | -                | -          | -          | -                 | -           | -          | -                 | -                              | -                       | -                 | -           |
| Chilean registries                 | 2000-2012       | 775                | 0.0              | 0.0        | 2.2        | 758               | 30.2        | 0.5        | 525               | 36.0                           | 48.0                    | 0.0               | 0.2         |
| Antofagasta                        | 2003-2010       | 163                | 0.0              | 0.0        | 2.5        | 159               | 34.0        | 0.0        | 105               | 60.0                           | 40.0                    | 0.0               | 0.0         |
| Biobio                             | 2003-2012       | 135                | 0.0              | 0.0        | 2.2        | 132               | 18.9        | 0.0        | 107               | 13.1                           | 86.9                    | 0.0               | 0.0         |
| Concepción                         | 2006-2010       | 271                | 0.0              | 0.0        | 1.5        | 267               | 33.7        | 1.1        | 174               | 35.1                           | 66.1                    | 0.0               | 0.6         |
| Los Rios                           | 2000-2012       | 206                | 0.0              | 0.0        | 2.9        | 200               | 30.0        | 0.5        | 139               | 36.7                           | 1.4                     | 0.0               | 0.0         |
| Colombian registries               | 2000-2014       | 1,460              | 1.6              | 0.0        | 1.8        | 1,409             | 17.5        | 2.4        | 1,129             | 75.7                           | 22.4                    | 0.0               | 6.9         |
| Bucaramanga                        | -               | -                  | -                | -          | -          | -                 | -           | -          | -                 | -                              | -                       | -                 | -           |
| Cali                               | 2000-2014       | 1,244              | 0.8              | 0.0        | 1.9        | 1,210             | 16.7        | 1.3        | 992               | 74.6                           | 22.7                    | 0.0               | 7.7         |
| Manizales                          | 2003-2012       | 73                 | 16.4             | 0.0        | 1.4        | 60                | 1.7         | 21.7       | 46                | 95.7                           | 10.9                    | 0.0               | 4.3         |
| Pasto                              | 2000-2012       | 143                | 1.4              | 0.0        | 1.4        | 139               | 30.9        | 3.6        | 91                | 78.0                           | 25.3                    | 0.0               | 0.0         |
| Costa Rica *                       | 2002-2014       | 2,188              | 0.0              | 0.0        | 2.3        | 2,137             | 40.6        | 1.4        | 1,239             | 60.5                           | 45.4                    | 0.0               | 0.0         |
| Cuba *                             | -               | -                  | -                | -          | -          | -                 | -           | -          | -                 | -                              | -                       | -                 | -           |
| Ecuadorian registries              | 2000-2013       | 2,486              | 4.3              | 0.0        | 3.0        | 2,304             | 34.3        | 0.5        | 1,502             | 69.2                           | 33.1                    | 0.3               | 1.4         |
| Cuenca                             | 2000-2012       | 226                | 22.1             | 0.0        | 2.7        | 170               | 34.1        | 0.0        | 112               | 58.9                           | 41.1                    | 0.0               | 12.5        |
| Guayaquil                          | 2005-2013       | 769                | 0.0              | 0.0        | 3.6        | 741               | 30.5        | 1.5        | 504               | 58.3                           | 45.0                    | 0.0               | 0.0         |
| Loja                               | 2000-2013       | 115                | 0.0              | 0.9        | 7.0        | 106               | 11.3        | 0.0        | 94                | 54.3                           | 48.9                    | 5.3               | 0.0         |
| Manabí                             | 2000-2013       | 440                | 5.9              | 0.0        | 2.0        | 405               | 48.1        | 0.0        | 210               | 62.9                           | 38.6                    | 0.0               | 1.4         |
| Quito                              | 2000-2013       | 936                | 3.3              | 0.0        | 2.5        | 882               | 34.0        | 0.0        | 582               | 85.2                           | 16.7                    | 0.0               | 0.7         |
| Guadeloupe *                       | 2008-2013       | 89                 | 0.0              | 0.0        | 2.2        | 87                | 0.0         | 5.7        | 82                | 82.9                           | 26.8                    | 0.0               | 14.6        |
| Martinique *                       | 2000-2012       | 218                | 0.0              | 0.0        | 0.0        | 218               | 0.0         | 5.5        | 206               | 69.4                           | 2.4                     | 4.9               | 0.0         |
| Mexico (Childhood) †               | -               | -                  | -                | -          | -          | -                 | -           | -          | -                 | -                              | -                       | -                 | -           |
| Peru (Lima)                        | -               | -                  | -                | -          | -          | -                 | -           | -          | -                 | -                              | -                       | -                 | -           |
| Puerto Rico *                      | 2000-2011       | 3,581              | 5.2              | 0.0        | 1.1        | 3,358             | 31.7        | 2.7        | 2,202             | 91.7                           | 11.9                    | 0.0               | 0.0         |
| Uruguay *                          | 2008-2012       | 502                | 0.0              | 0.0        | 2.2        | 491               | 36.9        | 0.4        | 308               | 90.3                           | 10.4                    | 0.0               | 0.0         |
| <b>AMERICA (North)</b>             |                 | <b>276,131</b>     | <b>1.0</b>       | <b>0.0</b> | <b>1.4</b> | <b>269,440</b>    | <b>5.4</b>  | <b>2.9</b> | <b>246,966</b>    | <b>96.5</b>                    | <b>4.1</b>              | <b>0.4</b>        | <b>0.0</b>  |
| Canadian registries                | 2000-2014       | 22,291             | 0.2              | 0.0        | 1.1        | 21,992            | 3.2         | 2.0        | 20,858            | 91.3                           | 8.3                     | 0.0               | 0.0         |
| Alberta                            | 2000-2014       | 2,816              | 0.2              | 0.0        | 1.9        | 2,755             | 1.2         | 0.5        | 2,707             | 98.0                           | 2.3                     | 0.0               | 0.0         |
| British Columbia                   | 2000-2014       | 4,724              | 0.7              | 0.0        | 2.3        | 4,578             | 4.2         | 2.4        | 4,277             | 96.9                           | 3.3                     | 0.0               | 0.0         |
| Manitoba                           | 2000-2014       | 984                | 0.1              | 0.0        | 1.7        | 966               | 3.0         | 1.3        | 924               | 93.2                           | 7.4                     | 0.0               | 0.0         |
| New Brunswick                      | 2000-2014       | 486                | 0.0              | 0.0        | 2.5        | 474               | 1.5         | 2.1        | 457               | 67.4                           | 0.2                     | 0.0               | 0.0         |
| Newfoundland & Labrador            | 2000-2014       | 368                | 0.3              | 0.0        | 2.4        | 358               | 7.3         | 2.5        | 323               | 86.7                           | 14.9                    | 0.0               | 0.0         |
| Nova Scotia                        | 2000-2014       | 659                | 0.8              | 0.0        | 2.1        | 640               | 2.2         | 3.4        | 604               | 88.9                           | 11.6                    | 0.0               | 0.0         |
| Ontario                            | 2000-2014       | 11,515             | 0.0              | 0.0        | 0.0        | 11,515            | 3.0         | 2.1        | 10,927            | 88.5                           | 11.8                    | 0.0               | 0.0         |
| Prince Edward Island               | 2000-2014       | 101                | 0.0              | 0.0        | 2.0        | 99                | 6.1         | 2.0        | 91                | 90.1                           | 12.1                    | 0.0               | 0.0         |
| Saskatchewan                       | 2000-2014       | 638                | 0.2              | 0.0        | 4.7        | 607               | 7.2         | 2.5        | 548               | 93.8                           | 6.8                     | 0.0               | 0.0         |
| US registries                      | 2000-2014       | 253,840            | 1.1              | 0.0        | 1.4        | 247,448           | 5.6         | 3.0        | 226,108           | 97.0                           | 3.7                     | 0.5               | 0.0         |
| Alabama                            | 2000-2014       | 4,540              | 1.0              | 0.0        | 1.7        | 4,416             | 7.3         | 4.6        | 3,889             | 92.2                           | 8.7                     | 0.0               | 0.0         |
| Alaska                             | 2000-2013       | 630                | 2.9              | 0.0        | 1.3        | 604               | 3.1         | 2.2        | 572               | 96.9                           | 3.5                     | 0.0               | 0.0         |
| Arkansas                           | 2000-2011       | 1,832              | 0.3              | 0.0        | 2.1        | 1,788             | 6.0         | 3.0        | 1,627             | 98.3                           | 2.2                     | 0.0               | 0.0         |
| California                         | 2000-2011       | 34,635             | 2.3              | 0.0        | 1.0        | 33,507            | 2.6         | 1.8        | 32,029            | 97.2                           | 3.3                     | 0.0               | 0.0         |
| Greater Bay Area                   | 2000-2014       | 10,422             | 1.7              | 0.0        | 0.9        | 10,154            | 3.3         | 0.6        | 9,757             | 98.9                           | 1.4                     | 3.6               | 0.0         |
| Greater California                 | 2000-2014       | 23,766             | 2.2              | 0.0        | 0.9        | 23,020            | 2.6         | 2.3        | 21,908            | 96.5                           | 4.0                     | 2.5               | 0.0         |
| Los Angeles                        | 2000-2014       | 12,684             | 2.3              | 0.0        | 1.1        | 12,259            | 2.8         | 2.1        | 11,657            | 97.1                           | 3.4                     | 5.6               | 0.0         |
| Colorado                           | 2000-2013       | 3,970              | 0.2              | 0.0        | 1.6        | 3,898             | 6.5         | 3.0        | 3,528             | 97.1                           | 3.1                     | 0.0               | 0.0         |
| Connecticut                        | 2000-2014       | 4,107              | 0.3              | 0.0        | 2.0        | 4,014             | 2.7         | 4.2        | 3,735             | 97.9                           | 3.2                     | 1.8               | 0.0         |
| Delaware                           | 2000-2014       | 1,020              | 0.6              | 0.0        | 1.8        | 996               | 4.6         | 3.2        | 918               | 98.6                           | 2.0                     | 0.0               | 0.0         |
| Florida                            | 2000-2013       | 20,421             | 0.1              | 0.0        | 1.4        | 20,122            | 8.8         | 2.9        | 17,758            | 97.5                           | 3.8                     | 0.0               | 0.0         |
| Georgia                            | 2000-2014       | 8,014              | 0.0              | 0.0        | 1.3        | 7,903             | 4.3         | 3.3        | 7,303             | 98.1                           | 2.6                     | 0.0               | 0.0         |
| Atlanta                            | 2000-2014       | 2,639              | 0.0              | 0.0        | 1.2        | 2,606             | 2.8         | 2.7        | 2,464             | 99.1                           | 1.4                     | 0.0               | 0.0         |
| Hawaii                             | 2000-2014       | 2,361              | 0.5              | 0.0        | 1.0        | 2,326             | 5.5         | 1.3        | 2,167             | 96.5                           | 4.2                     | 1.6               | 0.0         |
| Idaho                              | 2000-2014       | 1,136              | 1.0              | 0.0        | 1.5        | 1,108             | 8.5         | 4.3        | 966               | 97.8                           | 2.2                     | 0.0               | 0.0         |
| Indiana                            | 2000-2014       | 5,644              | 0.5              | 0.0        | 1.5        | 5,532             | 6.3         | 1.8        | 5,086             | 97.6                           | 2.7                     | 0.0               | 0.0         |
| Iowa                               | 2000-2014       | 2,607              | 1.0              | 0.0        | 1.6        | 2,539             | 4.5         | 5.4        | 2,288             | 97.2                           | 3.2                     | 0.6               | 0.0         |
| Kentucky                           | 2000-2014       | 4,198              | 0.0              | 0.0        | 1.6        | 4,130             | 3.0         | 4.9        | 3,804             | 95.8                           | 4.5                     | 0.6               | 0.0         |
| Louisiana                          | 2000-2014       | 5,372              | 0.5              | 0.0        | 1.9        | 5,245             | 6.0         | 2.9        | 4,775             | 97.5                           | 2.8                     | 1.2               | 0.0         |
| Maine                              | 2000-2013       | 1,093              | 0.1              | 0.0        | 1.6        | 1,074             | 5.3         | 2.5        | 990               | 97.1                           | 3.2                     | 0.0               | 0.0         |
| Massachusetts                      | 2000-2009       | 4,646              | 0.0              | 0.0        | 1.5        | 4,572             | 6.6         | 3.8        | 4,093             | 95.5                           | 4.8                     | 0.0               | 0.0         |
| Michigan                           | 2000-2013       | 9,239              | 0.4              | 0.0        | 1.6        | 9,056             | 4.4         | 3.4        | 8,351             | 93.0                           | 7.7                     | 0.0               | 0.0         |

Web-table 2.5: Data quality indicators, patients diagnosed during 2000-2014, by continent, country and registry: LIVER

|                     | Calendar period | Patients submitted | Ineligible (%) ¶ |            |            | Excluded (%) ¶¶   |            |            | Patients included | Data quality indicators (%) †† |                         |                   |            |
|---------------------|-----------------|--------------------|------------------|------------|------------|-------------------|------------|------------|-------------------|--------------------------------|-------------------------|-------------------|------------|
|                     |                 |                    | Incomplete dates | In situ    | Other      | Eligible patients | DCO        | Other      |                   | MV                             | Non-specific morphology | Lost to follow-up | Censored   |
| Detroit             | 2000-2014       | 4,752              | 0.5              | 0.0        | 1.4        | 4,662             | 5.0        | 2.3        | 4,319             | 98.7                           | 1.5                     | 1.0               | 0.0        |
| Minnesota           | 2000-2013       | 3,538              | 0.3              | 0.0        | 1.9        | 3,461             | 9.8        | 5.8        | 2,923             | 99.8                           | 0.5                     | 0.0               | 0.0        |
| Mississippi         | 2002-2014       | 2,695              | 0.4              | 0.0        | 2.0        | 2,629             | 7.9        | 4.2        | 2,311             | 98.5                           | 2.3                     | 0.0               | 0.0        |
| Missouri            | -               | -                  | -                | -          | -          | -                 | -          | -          | -                 | -                              | -                       | -                 | -          |
| Montana             | 2000-2014       | 791                | 1.5              | 0.1        | 2.0        | 762               | 9.2        | 5.8        | 648               | 98.6                           | 1.5                     | 0.0               | 0.0        |
| Nebraska            | 2000-2014       | 1,389              | 0.5              | 0.1        | 2.4        | 1,348             | 4.7        | 3.4        | 1,239             | 97.7                           | 2.7                     | 0.0               | 0.0        |
| New Hampshire       | 2000-2014       | 1,073              | 0.5              | 0.0        | 2.1        | 1,045             | 7.1        | 3.5        | 934               | 96.8                           | 4.1                     | 0.0               | 0.0        |
| New Jersey          | 2000-2014       | 9,785              | 1.5              | 0.0        | 1.6        | 9,481             | 5.1        | 3.0        | 8,712             | 97.0                           | 3.6                     | 9.7               | 0.0        |
| New Mexico          | 2000-2014       | 2,710              | 0.0              | 0.0        | 1.3        | 2,676             | 9.8        | 2.0        | 2,361             | 96.9                           | 4.8                     | 1.8               | 0.2        |
| New York            | 2000-2014       | 25,060             | 3.5              | 0.0        | 1.3        | 23,845            | 3.0        | 2.8        | 22,458            | 98.3                           | 2.1                     | 0.0               | 0.0        |
| New York City       | 2000-2014       | 13,072             | 4.4              | 0.0        | 1.2        | 12,337            | 2.7        | 2.5        | 11,706            | 98.8                           | 1.5                     | 0.0               | 0.0        |
| North Carolina      | 2000-2014       | 8,925              | 0.0              | 0.0        | 1.2        | 8,814             | 6.8        | 1.4        | 8,097             | 97.2                           | 3.4                     | 0.0               | 0.0        |
| Ohio                | 2000-2014       | 10,736             | 0.1              | 0.0        | 1.9        | 10,530            | 9.5        | 3.4        | 9,173             | 97.8                           | 3.8                     | 0.0               | 0.0        |
| Oklahoma            | 2000-2010       | 2,457              | 0.6              | 0.0        | 2.2        | 2,389             | 8.7        | 4.1        | 2,083             | 93.5                           | 8.8                     | 0.0               | 0.0        |
| Oregon              | 2000-2013       | 3,865              | 0.1              | 0.0        | 1.6        | 3,801             | 3.7        | 2.9        | 3,550             | 94.2                           | 6.7                     | 0.0               | 0.0        |
| Pennsylvania        | 2000-2014       | 15,267             | 1.1              | 0.0        | 1.7        | 14,836            | 5.5        | 3.2        | 13,555            | 98.1                           | 2.4                     | 0.0               | 0.0        |
| Rhode Island        | 2000-2014       | 1,341              | 0.1              | 0.0        | 1.1        | 1,325             | 4.1        | 3.9        | 1,219             | 95.9                           | 4.5                     | 0.0               | 0.0        |
| South Carolina      | 2000-2014       | 4,338              | 0.0              | 0.0        | 1.3        | 4,282             | 6.2        | 3.7        | 3,859             | 91.9                           | 8.5                     | 0.0               | 0.0        |
| Tennessee           | 2000-2011       | 3,977              | 0.7              | 0.0        | 1.7        | 3,884             | 8.3        | 4.4        | 3,391             | 97.7                           | 2.9                     | 0.0               | 0.0        |
| Texas               | 2000-2013       | 27,931             | 1.1              | 0.0        | 1.2        | 27,289            | 6.8        | 2.6        | 24,703            | 96.9                           | 3.9                     | 0.0               | 0.0        |
| Utah                | 2000-2014       | 1,403              | 0.8              | 0.0        | 1.6        | 1,369             | 1.4        | 3.2        | 1,306             | 98.2                           | 2.4                     | 1.5               | 0.0        |
| Vermont             | 2000-2013       | 509                | 0.6              | 0.0        | 2.2        | 495               | 4.6        | 3.8        | 453               | 97.6                           | 3.3                     | 0.0               | 0.0        |
| Washington          | 2000-2008       | 3,519              | 0.9              | 0.0        | 0.9        | 3,456             | 2.5        | 1.9        | 3,303             | 97.6                           | 3.0                     | 0.0               | 0.0        |
| Seattle             | 2000-2014       | 5,661              | 0.6              | 0.0        | 0.6        | 5,593             | 1.4        | 1.1        | 5,453             | 98.5                           | 1.7                     | 1.5               | 0.0        |
| West Virginia       | 2000-2014       | 1,800              | 1.1              | 0.1        | 1.2        | 1,758             | 5.3        | 6.9        | 1,543             | 94.7                           | 5.8                     | 0.0               | 0.0        |
| Wisconsin           | 2000-2013       | 4,905              | 0.7              | 0.0        | 1.6        | 4,789             | 8.8        | 5.9        | 4,085             | 96.8                           | 4.0                     | 0.0               | 0.0        |
| Wyoming             | 2000-2013       | 361                | 0.3              | 0.0        | 1.7        | 354               | 2.0        | 6.8        | 323               | 98.8                           | 2.2                     | 0.0               | 0.0        |
| <b>ASIA</b>         |                 | <b>668,192</b>     | <b>0.5</b>       | <b>0.0</b> | <b>0.2</b> | <b>663,030</b>    | <b>6.6</b> | <b>0.3</b> | <b>617,479</b>    | <b>69.2</b>                    | <b>16.4</b>             | <b>0.2</b>        | <b>0.4</b> |
| Chinese registries  | 2003-2013       | 77,301             | 1.4              | 0.0        | 0.0        | 76,227            | 2.5        | 0.0        | 74,295            | 24.4                           | 78.9                    | 1.4               | 0.1        |
| Beijing             | 2003-2013       | 15,729             | 0.0              | 0.0        | 0.0        | 15,719            | 1.7        | 0.1        | 15,438            | 32.7                           | 67.3                    | 3.3               | 0.2        |
| Changle             | 2003-2013       | 2,111              | 2.7              | 0.0        | 0.0        | 2,054             | 1.2        | 0.0        | 2,028             | 27.0                           | 83.8                    | 0.4               | 0.0        |
| Cixian              | 2003-2013       | 1,389              | 0.0              | 0.0        | 0.0        | 1,389             | 2.9        | 0.0        | 1,349             | 40.4                           | 59.8                    | 0.0               | 0.0        |
| Dafeng              | 2003-2013       | 2,355              | 0.0              | 0.0        | 0.0        | 2,355             | 0.6        | 0.0        | 2,342             | 26.7                           | 83.2                    | 0.0               | 0.0        |
| Dalian              | 2003-2013       | 7,043              | 0.0              | 0.0        | 0.0        | 7,041             | 14.4       | 0.0        | 6,024             | 42.4                           | 58.9                    | 0.0               | 0.1        |
| Donghai             | 2003-2013       | 2,636              | 0.2              | 0.0        | 0.1        | 2,629             | 3.3        | 0.0        | 2,542             | 32.6                           | 67.7                    | 3.1               | 0.0        |
| Feicheng            | 2003-2013       | 2,218              | 0.0              | 0.0        | 0.0        | 2,217             | 0.5        | 0.0        | 2,205             | 7.9                            | 93.1                    | 1.1               | 0.0        |
| Ganyu               | 2003-2013       | 2,085              | 0.0              | 0.0        | 0.0        | 2,085             | 0.4        | 0.0        | 2,077             | 32.5                           | 70.4                    | 1.2               | 0.0        |
| Guanyun             | 2004-2013       | 2,986              | 0.0              | 0.0        | 0.0        | 2,985             | 2.2        | 0.0        | 2,919             | 21.5                           | 95.6                    | 1.0               | 0.0        |
| Haimen              | 2003-2013       | 6,262              | 0.0              | 0.0        | 0.0        | 6,261             | 1.0        | 0.0        | 6,198             | 12.0                           | 88.0                    | 0.2               | 0.0        |
| Haining             | 2003-2013       | 1,656              | 0.0              | 0.0        | 0.0        | 1,656             | 1.5        | 0.2        | 1,627             | 16.3                           | 92.1                    | 0.4               | 0.1        |
| Jianhu              | 2003-2013       | 2,777              | 0.0              | 0.0        | 0.0        | 2,776             | 0.0        | 0.0        | 2,776             | 21.0                           | 97.2                    | 3.2               | 0.0        |
| Jiashan             | 2003-2013       | 1,575              | 0.0              | 0.0        | 0.0        | 1,575             | 0.4        | 0.0        | 1,568             | 21.5                           | 78.6                    | 0.3               | 0.0        |
| Jintan              | 2003-2013       | 1,111              | 0.1              | 0.0        | 1.1        | 1,098             | 1.5        | 0.0        | 1,082             | 12.7                           | 87.6                    | 0.6               | 0.0        |
| Lianyungang         | 2008-2013       | 1,344              | 0.0              | 0.0        | 0.1        | 1,343             | 2.1        | 0.0        | 1,315             | 39.9                           | 77.2                    | 7.1               | 0.4        |
| Linzhou             | 2003-2013       | 1,588              | 0.0              | 0.0        | 0.0        | 1,588             | 4.6        | 0.0        | 1,515             | 25.9                           | 74.1                    | 0.0               | 0.0        |
| Qidong              | 2003-2013       | 9,513              | 0.0              | 0.0        | 0.0        | 9,513             | 0.1        | 0.0        | 9,505             | 17.8                           | 82.2                    | 0.5               | 0.0        |
| Sihui               | 2003-2013       | 1,716              | 1.7              | 0.0        | 0.0        | 1,686             | 8.4        | 0.0        | 1,544             | 13.5                           | 86.6                    | 2.3               | 0.1        |
| Taixing             | 2003-2013       | 6,099              | 15.5             | 0.0        | 0.0        | 5,151             | 0.1        | 0.0        | 5,145             | 6.6                            | 96.9                    | 1.5               | 0.0        |
| Yangzhong           | 2003-2013       | 731                | 0.0              | 0.0        | 0.0        | 731               | 1.4        | 0.0        | 721               | 21.8                           | 100.0                   | 0.0               | 0.0        |
| Zhongshan           | 2003-2013       | 4,377              | 0.0              | 0.0        | 0.0        | 4,375             | 0.0        | 0.0        | 4,375             | 26.0                           | 76.7                    | 0.1               | 0.0        |
| Cyprus *            | 2004-2014       | 471                | 0.0              | 0.0        | 2.3        | 460               | 40.4       | 5.9        | 247               | 93.9                           | 6.9                     | 0.0               | 6.9        |
| Hong Kong *         | -               | -                  | -                | -          | -          | -                 | -          | -          | -                 | -                              | -                       | -                 | -          |
| Indian registries   | 2000-2014       | 240                | 0.4              | 0.0        | 0.0        | 239               | 3.3        | 0.4        | 230               | 38.3                           | 62.6                    | 0.0               | 0.0        |
| Guwahati            | -               | -                  | -                | -          | -          | -                 | -          | -          | -                 | -                              | -                       | -                 | -          |
| Karunagappally      | 2000-2014       | 240                | 0.4              | 0.0        | 0.0        | 239               | 3.3        | 0.4        | 230               | 38.3                           | 62.6                    | 0.0               | 0.0        |
| Iran (Golestan)     | -               | -                  | -                | -          | -          | -                 | -          | -          | -                 | -                              | -                       | -                 | -          |
| Israel *            | 2000-2013       | 3,180              | 0.0              | 0.0        | 4.2        | 3,044             | 21.8       | 2.3        | 2,310             | 95.3                           | 5.7                     | 0.0               | 0.0        |
| Japanese registries | 2000-2014       | 162,233            | 0.7              | 0.0        | 0.4        | 160,511           | 23.5       | 0.0        | 122,792           | 93.7                           | 3.9                     | 0.0               | 1.0        |
| Aichi               | 2003-2013       | 21,703             | 0.5              | 0.0        | 0.6        | 21,464            | 19.4       | 0.0        | 17,307            | 94.1                           | 6.3                     | 0.0               | 1.1        |
| Akita               | 2010-2014       | 1,407              | 2.6              | 0.0        | 0.5        | 1,364             | 0.0        | 1.6        | 1,342             | 81.5                           | 21.8                    | 0.0               | 20.0       |
| Ehime               | 2007-2013       | 5,389              | 0.2              | 0.0        | 0.4        | 5,358             | 24.1       | 0.0        | 4,065             | 95.8                           | 4.3                     | 0.0               | 0.0        |
| Fukui               | 2003-2009       | 2,101              | 0.3              | 0.0        | 0.3        | 2,087             | 4.0        | 0.0        | 2,003             | 88.5                           | 12.0                    | 0.0               | 0.9        |
| Gunma               | 2003-2012       | 6,580              | 7.0              | 0.0        | 0.2        | 6,106             | 35.3       | 0.2        | 3,942             | 23.5                           | 0.5                     | 0.0               | 1.3        |
| Hiroshima           | 2004-2008       | 7,446              | 0.9              | 0.0        | 0.8        | 7,318             | 16.5       | 0.0        | 6,107             | 98.7                           | 1.3                     | 0.0               | 0.3        |
| Hyogo               | 2007-2012       | 14,912             | 0.7              | 0.0        | 0.4        | 14,745            | 35.0       | 0.0        | 9,591             | 95.5                           | 4.8                     | 0.0               | 0.6        |
| Ibaraki             | 2006-2012       | 6,364              | 0.6              | 0.0        | 0.3        | 6,304             | 25.4       | 0.0        | 4,704             | 92.3                           | 8.5                     | 0.0               | 0.8        |
| Kanagawa            | 2000-2013       | 31,512             | 0.0              | 0.0        | 0.2        | 31,444            | 31.7       | 0.1        | 21,449            | 99.7                           | 0.5                     | 0.0               | 0.0        |
| Miyagi              | 2000-2010       | 6,437              | 1.4              | 0.0        | 0.3        | 6,328             | 17.7       | 0.1        | 5,199             | 90.9                           | 9.1                     | 0.0               | 0.7        |
| Niigata             | 2000-2013       | 8,029              | 0.4              | 0.0        | 1.2        | 7,901             | 18.0       | 0.1        | 6,473             | 94.9                           | 0.0                     | 0.0               | 0.0        |
| Osaka               | 2000-2008       | 36,341             | 0.0              | 0.0        | 0.2        | 36,256            | 19.9       | 0.0        | 29,032            | 98.1                           | 2.0                     | 0.0               | 1.8        |
| Saga                | 2006-2013       | 3,415              | 0.8              | 0.0        | 0.5        | 3,373             | 16.3       | 0.0        | 2,823             | 94.4                           | 5.7                     | 0.0               | 0.0        |
| Tochigi             | 2006-2013       | 5,030              | 0.6              | 0.0        | 0.4        | 4,979             | 19.4       | 0.0        | 4,011             | 95.7                           | 4.6                     | 0.0               | 0.4        |
| Yamagata            | 2003-2013       | 3,614              | 0.9              | 0.0        | 0.4        | 3,569             | 11.7       | 0.0        | 3,151             | 87.9                           | 12.3                    | 0.0               | 0.3        |
| Yamanashi           | 2008-2012       | 1,953              | 1.4              | 0.0        | 0.6        | 1,915             | 16.8       | 0.0        | 1,593             | 92.8                           | 7.9                     | 0.0               | 0.1        |
| Jordan *            | 2000-2014       | 722                | 0.1              | 0.0        | 9.0        | 656               | 1.5        | 6.1        | 606               | 97.2                           | 5.6                     | 3.1               | 0.0        |
| Korea * ‡           | 2000-2014       | 216,759            | 0.6              | 0.0        | 0.0        | 215,479           | 0.0        | 0.3        | 214,821           | 93.6                           | 6.7                     | 0.0               | 0.0        |
| Kuwait *            | 2000-2013       | 303                | 0.3              | 0.0        | 0.0        | 302               | 13.2       | 0.3        | 261               | 100.0                          | 0.4                     | 1.1               | 0.0        |
| Malaysia (Penang)   | 2000-2013       | 1,065              | 0.2              | 0.0        | 1.1        | 1,051             | 8.1        | 3.7        | 927               | 94.6                           | 6.8                     | 0.0               | 3.1        |
| Mongolia *          | -               | -                  | -                | -          | -          | -                 | -          | -          | -                 | -                              | -                       | -                 | -          |
| Qatar *             | 2000-2014       | 480                | 0.0              | 0.0        | 1.7        | 472               | 3.6        | 3.6        | 438               | 56.2                           | 44.7                    | 0.0               | 38.4       |
| Singapore *         | 2000-2014       | 7,462              | 0.0              | 0.0        | 0.6        | 7,415             | 4.2        | 0.1        | 7,101             | 41.1                           | 9.5                     | 0.0               | 0.0        |
| Taiwan *            | 2000-2014       | 158,761            | 0.1              | 0.0        | 0.2        | 158,285           | 0.0        | 0.1        | 158,157           | 45.8                           | 0.1                     | 0.0               | 0.0        |

Web-table 2.5: Data quality indicators, patients diagnosed during 2000-2014, by continent, country and registry: LIVER

|                                | Calendar period | Patients submitted | Ineligible (%) ¶ |            |            | Excluded (%) ¶¶   |            |            | Patients included | Data quality indicators (%) †† |                         |                   |            |
|--------------------------------|-----------------|--------------------|------------------|------------|------------|-------------------|------------|------------|-------------------|--------------------------------|-------------------------|-------------------|------------|
|                                |                 |                    | Incomplete dates | In situ    | Other      | Eligible patients | DCO        | Other      |                   | MV                             | Non-specific morphology | Lost to follow-up | Censored   |
| Thai registries                | 2000-2014       | 34,076             | 0.0              | 0.0        | 0.4        | 33,955            | 6.9        | 2.4        | 30,814            | 29.6                           | 70.6                    | 0.0               | 3.0        |
| Bangkok                        | 2000-2012       | 11,831             | 0.0              | 0.0        | 0.7        | 11,745            | 6.2        | 6.5        | 10,247            | 27.0                           | 73.1                    | 0.0               | 0.0        |
| Khon Kaen                      | 2000-2014       | 11,536             | 0.0              | 0.0        | 0.1        | 11,521            | 4.5        | 0.2        | 10,981            | 38.4                           | 61.7                    | 0.0               | 4.9        |
| Lampang                        | 2000-2014       | 4,246              | 0.0              | 0.0        | 0.0        | 4,246             | 8.2        | 0.1        | 3,894             | 21.7                           | 78.3                    | 0.0               | 0.0        |
| Lamphun                        | 2000-2014       | 1,424              | 0.0              | 0.0        | 0.0        | 1,424             | 15.1       | 0.2        | 1,206             | 14.8                           | 85.2                    | 0.0               | 0.0        |
| Lopburi                        | 2000-2014       | 3,094              | 0.0              | 0.0        | 0.1        | 3,090             | 12.8       | 0.0        | 2,694             | 26.8                           | 73.2                    | 0.0               | 13.5       |
| Songkhla                       | 2000-2014       | 1,945              | 0.0              | 0.0        | 0.8        | 1,929             | 6.7        | 0.4        | 1,792             | 21.5                           | 79.8                    | 0.3               | 1.7        |
| Turkish registries             | 2000-2013       | 5,139              | 1.4              | 0.0        | 2.6        | 4,934             | 6.5        | 2.7        | 4,480             | 90.9                           | 8.2                     | 0.0               | 4.9        |
| Ankara                         | 2008-2012       | 1,526              | 0.0              | 0.0        | 3.5        | 1,472             | 3.7        | 3.9        | 1,360             | 90.7                           | 4.3                     | 0.0               | 1.8        |
| Antalya                        | 2006-2012       | 367                | 0.0              | 0.0        | 1.9        | 360               | 3.6        | 1.4        | 342               | 91.5                           | 8.8                     | 0.0               | 1.8        |
| Bursa                          | 2006-2012       | 442                | 4.3              | 0.0        | 1.1        | 418               | 15.3       | 3.3        | 340               | 87.1                           | 14.1                    | 0.0               | 0.0        |
| Edirne                         | 2006-2012       | 150                | 5.3              | 0.0        | 2.0        | 139               | 19.4       | 3.6        | 107               | 50.5                           | 51.4                    | 0.0               | 0.0        |
| Erzurum                        | 2006-2012       | 121                | 2.5              | 0.0        | 4.1        | 113               | 4.4        | 9.7        | 97                | 93.8                           | 7.2                     | 0.0               | 0.0        |
| Eskisehir                      | 2006-2012       | 147                | 0.0              | 0.0        | 1.4        | 145               | 0.0        | 0.0        | 145               | 100.0                          | 0.0                     | 0.0               | 0.0        |
| Izmir                          | 2000-2013       | 1,971              | 2.0              | 0.0        | 2.6        | 1,880             | 6.9        | 2.0        | 1,713             | 94.0                           | 6.8                     | 0.0               | 11.0       |
| Samsun                         | 2006-2012       | 243                | 0.0              | 0.0        | 2.1        | 238               | 8.4        | 1.3        | 215               | 80.5                           | 21.4                    | 0.0               | 0.0        |
| Trabzon                        | 2006-2012       | 172                | 0.6              | 0.0        | 1.2        | 169               | 4.1        | 0.6        | 161               | 95.7                           | 5.0                     | 0.0               | 1.2        |
| <b>EUROPE</b>                  |                 | <b>325,342</b>     | <b>0.1</b>       | <b>0.2</b> | <b>2.9</b> | <b>314,810</b>    | <b>8.5</b> | <b>1.3</b> | <b>283,720</b>    | <b>73.7</b>                    | <b>15.0</b>             | <b>0.4</b>        | <b>0.8</b> |
| Austria *                      | 2000-2014       | 13,874             | 0.0              | 0.0        | 0.6        | 13,794            | 15.7       | 7.7        | 10,570            | 97.1                           | 4.8                     | 0.0               | 0.0        |
| Belarus (Childhood) †          | -               | -                  | -                | -          | -          | -                 | -          | -          | -                 | -                              | -                       | -                 | -          |
| Belgium *                      | 2004-2014       | 7,083              | 0.0              | 0.1        | 0.5        | 7,037             | 0.1        | 0.0        | 7,026             | 96.6                           | 4.1                     | 1.2               | 0.0        |
| Bulgaria *                     | 2000-2014       | 8,680              | 0.0              | 0.0        | 0.3        | 8,652             | 34.1       | 0.0        | 5,704             | 59.6                           | 1.6                     | 0.0               | 0.0        |
| Croatia *                      | 2000-2014       | 6,672              | 0.0              | 0.0        | 0.4        | 6,646             | 17.7       | 0.2        | 5,456             | 65.6                           | 0.1                     | 0.0               | 0.0        |
| Czech Republic *               | 2000-2014       | 13,202             | 0.0              | 0.0        | 0.9        | 13,079            | 5.1        | 2.7        | 12,056            | 62.6                           | 2.9                     | 0.0               | 0.0        |
| Denmark *                      | 2000-2014       | 4,865              | 0.0              | 0.0        | 3.2        | 4,708             | 0.0        | 0.0        | 4,708             | 86.9                           | 29.0                    | 0.1               | 0.0        |
| Estonia *                      | 2000-2012       | 1,063              | 0.0              | 0.0        | 1.1        | 1,051             | 13.0       | 1.0        | 903               | 68.0                           | 3.9                     | 0.0               | 0.0        |
| Finland *                      | 2000-2014       | 6,139              | 0.9              | 0.0        | 2.3        | 5,944             | 14.1       | 0.2        | 5,096             | 82.9                           | 7.2                     | 0.0               | 0.0        |
| French registries              | 2000-2010       | 15,134             | 0.4              | 0.0        | 0.0        | 15,073            | 0.0        | 1.7        | 14,818            | 65.0                           | 3.0                     | 0.8               | 0.0        |
| Bas-Rhin                       | 2000-2010       | 1,533              | 0.0              | 0.0        | 0.0        | 1,533             | 0.0        | 0.5        | 1,525             | 65.5                           | 3.3                     | 0.4               | 0.0        |
| Basse Normandie                | -               | -                  | -                | -          | -          | -                 | -          | -          | -                 | -                              | -                       | -                 | -          |
| Burgundy Digestive             | 2000-2010       | 1,433              | 0.0              | 0.0        | 0.0        | 1,433             | 0.0        | 2.3        | 1,400             | 41.6                           | 0.5                     | 0.2               | 0.0        |
| Calvados                       | -               | -                  | -                | -          | -          | -                 | -          | -          | -                 | -                              | -                       | -                 | -          |
| Calvados Digestive             | 2000-2010       | 1,116              | 0.2              | 0.0        | 0.0        | 1,114             | 0.0        | 0.0        | 1,114             | 52.8                           | 18.1                    | 0.4               | 0.0        |
| Côte-d'Or Gynaecologic         | -               | -                  | -                | -          | -          | -                 | -          | -          | -                 | -                              | -                       | -                 | -          |
| Côte-d'Or Haematopoietic       | -               | -                  | -                | -          | -          | -                 | -          | -          | -                 | -                              | -                       | -                 | -          |
| Doubs                          | 2000-2010       | 559                | 0.0              | 0.0        | 0.2        | 558               | 0.0        | 0.0        | 558               | 64.9                           | 1.6                     | 0.0               | 0.0        |
| Finistère                      | 2005-2010       | 903                | 0.0              | 0.0        | 0.0        | 903               | 0.0        | 0.1        | 902               | 67.8                           | 0.2                     | 0.3               | 0.0        |
| Gironde CNS                    | -               | -                  | -                | -          | -          | -                 | -          | -          | -                 | -                              | -                       | -                 | -          |
| Gironde General                | 2005-2010       | 631                | 2.2              | 0.0        | 0.0        | 617               | 0.0        | 0.2        | 616               | 65.4                           | 5.8                     | 2.3               | 0.0        |
| Gironde Haematopoietic         | -               | -                  | -                | -          | -          | -                 | -          | -          | -                 | -                              | -                       | -                 | -          |
| Haut-Rhin                      | 2000-2010       | 820                | 0.2              | 0.0        | 0.0        | 818               | 0.0        | 2.4        | 798               | 71.4                           | 2.4                     | 1.9               | 0.0        |
| Haute-Vienne                   | 2009-2009       | 36                 | 0.0              | 0.0        | 0.0        | 36                | 0.0        | 2.8        | 35                | 65.7                           | 0.0                     | 2.9               | 0.0        |
| Hérault                        | 2000-2010       | 1,360              | 0.0              | 0.0        | 0.0        | 1,360             | 0.0        | 0.7        | 1,350             | 78.4                           | 0.4                     | 0.9               | 0.0        |
| Isère                          | 2000-2010       | 1,555              | 0.0              | 0.0        | 0.0        | 1,555             | 0.0        | 1.0        | 1,539             | 63.4                           | 1.6                     | 0.1               | 0.0        |
| Lille Metro                    | 2008-2010       | 283                | 0.0              | 0.0        | 0.0        | 283               | 0.0        | 0.4        | 282               | 51.8                           | 3.5                     | 0.7               | 0.0        |
| Loire-Atlantique               | 2000-2010       | 3,310              | 1.3              | 0.0        | 0.0        | 3,268             | 0.0        | 4.8        | 3,111             | 68.8                           | 1.0                     | 1.3               | 0.0        |
| Manche                         | 2000-2010       | 590                | 0.0              | 0.0        | 0.0        | 590               | 0.0        | 0.2        | 589               | 62.0                           | 6.6                     | 1.2               | 0.0        |
| Somme                          | 2000-2010       | 649                | 0.0              | 0.0        | 0.0        | 649               | 0.0        | 0.6        | 645               | 82.6                           | 1.2                     | 1.9               | 0.0        |
| Tarn                           | 2000-2010       | 356                | 0.0              | 0.0        | 0.0        | 356               | 0.0        | 0.6        | 354               | 76.6                           | 0.8                     | 1.4               | 0.0        |
| France Childhood Haem †        | -               | -                  | -                | -          | -          | -                 | -          | -          | -                 | -                              | -                       | -                 | -          |
| France Childhood Solid †       | -               | -                  | -                | -          | -          | -                 | -          | -          | -                 | -                              | -                       | -                 | -          |
| German registries              | 2000-2014       | 38,563             | 0.4              | 0.1        | 1.9        | 37,641            | 24.3       | 0.6        | 28,301            | 90.6                           | 1.3                     | 0.1               | 7.0        |
| Brandenburg                    | 2000-2014       | 4,101              | 0.0              | 0.1        | 2.1        | 4,010             | 27.9       | 0.1        | 2,888             | 89.8                           | 0.9                     | 0.0               | 8.7        |
| Bremen                         | 2000-2013       | 838                | 0.0              | 0.0        | 3.9        | 805               | 15.8       | 0.0        | 678               | 83.9                           | 0.4                     | 0.7               | 0.0        |
| Hamburg                        | 2000-2013       | 2,196              | 0.0              | 0.0        | 0.0        | 2,196             | 20.3       | 0.1        | 1,747             | 98.5                           | 1.7                     | 1.4               | 0.0        |
| Lower Saxony                   | 2003-2013       | 7,127              | 2.2              | 0.0        | 1.8        | 6,840             | 23.3       | 2.1        | 5,098             | 99.0                           | 1.3                     | 0.0               | 8.5        |
| Mecklenburg-W. Pomerania       | 2000-2014       | 2,860              | 0.0              | 0.4        | 2.2        | 2,785             | 22.1       | 0.3        | 2,163             | 85.7                           | 0.6                     | 0.0               | 8.8        |
| Rhineland Palatinate           | 2000-2013       | 5,222              | 0.0              | 0.0        | 1.3        | 5,152             | 28.5       | 0.1        | 3,679             | 79.4                           | 0.0                     | 0.0               | 9.9        |
| Saarland                       | 2000-2012       | 1,554              | 0.0              | 0.0        | 0.3        | 1,549             | 19.6       | 1.2        | 1,227             | 95.2                           | 5.5                     | 0.0               | 0.0        |
| Saxony                         | 2000-2014       | 8,025              | 0.0              | 0.1        | 2.2        | 7,843             | 18.6       | 0.3        | 6,367             | 88.2                           | 1.3                     | 0.0               | 7.3        |
| Schleswig-Holstein             | 2000-2012       | 2,617              | 0.0              | 0.0        | 2.7        | 2,547             | 35.3       | 0.2        | 1,644             | 97.0                           | 3.0                     | 0.0               | 0.0        |
| Thuringia                      | 2000-2014       | 4,023              | 0.0              | 0.1        | 2.6        | 3,914             | 28.2       | 0.1        | 2,810             | 90.5                           | 0.7                     | 0.0               | 9.5        |
| Gibraltar *                    | 2004-2008       | 8                  | 37.5             | 0.0        | 0.0        | 5                 | 0.0        | 0.0        | 5                 | 100.0                          | 0.0                     | 0.0               | 20.0       |
| Greece (National Paediatric) † | -               | -                  | -                | -          | -          | -                 | -          | -          | -                 | -                              | -                       | -                 | -          |
| Iceland *                      | 2000-2014       | 185                | 0.0              | 0.0        | 4.9        | 176               | 2.8        | 3.4        | 165               | 78.8                           | 22.4                    | 0.0               | 0.0        |
| Ireland *                      | 2000-2013       | 2,358              | 0.0              | 0.0        | 1.5        | 2,323             | 3.7        | 2.5        | 2,178             | 53.7                           | 3.9                     | 0.0               | 0.0        |
| Italian registries             | 2000-2014       | 65,174             | 0.0              | 0.0        | 0.2        | 65,029            | 1.8        | 1.2        | 63,084            | 56.1                           | 45.1                    | 0.5               | 0.5        |
| Alto Adige                     | 2000-2010       | 846                | 0.0              | 0.0        | 0.0        | 846               | 3.4        | 0.5        | 813               | 54.7                           | 45.5                    | 0.0               | 0.0        |
| Barletta-Andria-Trani          | 2006-2012       | 768                | 0.0              | 0.0        | 0.4        | 765               | 5.4        | 0.0        | 724               | 35.2                           | 65.3                    | 0.4               | 0.0        |
| Basilicata                     | 2006-2010       | 726                | 0.0              | 0.0        | 0.6        | 722               | 0.0        | 0.8        | 716               | 60.3                           | 40.2                    | 0.3               | 0.3        |
| Bergamo                        | 2007-2012       | 2,047              | 0.0              | 0.0        | 0.0        | 2,046             | 0.0        | 0.4        | 2,036             | 48.6                           | 52.4                    | 0.2               | 0.0        |
| Biella-Vercelli                | 2000-2010       | 643                | 0.0              | 0.0        | 0.2        | 642               | 2.6        | 0.3        | 623               | 52.3                           | 47.7                    | 0.5               | 1.9        |
| Brescia                        | 2000-2008       | 3,053              | 0.0              | 0.0        | 0.1        | 3,051             | 0.0        | 1.6        | 3,003             | 49.8                           | 51.7                    | 0.3               | 0.0        |
| Brindisi                       | 2006-2008       | 221                | 0.0              | 0.0        | 0.0        | 221               | 0.0        | 0.5        | 220               | 47.3                           | 52.7                    | 0.0               | 0.0        |
| Caserta                        | 2008-2010       | 571                | 0.0              | 0.0        | 0.0        | 571               | 0.0        | 1.4        | 563               | 38.7                           | 62.0                    | 0.0               | 2.0        |
| Catania-Messina-Enna           | 2003-2012       | 2,465              | 0.0              | 0.0        | 0.3        | 2,457             | 3.8        | 0.3        | 2,357             | 31.9                           | 72.2                    | 0.0               | 1.7        |
| Catanzaro                      | 2003-2009       | 306                | 0.0              | 0.0        | 0.3        | 305               | 0.0        | 3.3        | 295               | 47.1                           | 53.6                    | 0.0               | 0.0        |
| Como                           | 2003-2011       | 1,163              | 0.0              | 0.0        | 0.2        | 1,161             | 0.1        | 0.0        | 1,160             | 79.7                           | 20.3                    | 0.7               | 0.0        |
| Cremona                        | 2005-2010       | 688                | 0.0              | 0.0        | 0.0        | 688               | 2.9        | 2.0        | 654               | 39.9                           | 60.6                    | 0.8               | 0.0        |
| Ferrara                        | 2000-2011       | 1,034              | 0.0              | 0.0        | 0.0        | 1,034             | 0.7        | 2.9        | 997               | 72.6                           | 28.3                    | 0.7               | 0.0        |
| Friuli-Venezia-Giulia          | 2000-2010       | 3,351              | 0.0              | 0.0        | 0.1        | 3,346             | 6.7        | 3.4        | 3,008             | 52.3                           | 48.1                    | 0.2               | 0.0        |
| Genoa                          | 2000-2009       | 1,878              | 0.0              | 0.0        | 0.6        | 1,867             | 0.4        | 0.1        | 1,858             | 73.1                           | 27.8                    | 0.1               | 0.0        |
| Latina                         | 2000-2011       | 676                | 0.0              | 0.0        | 0.1        | 675               | 0.0        | 1.5        | 665               | 40.2                           | 60.8                    | 1.2               | 1.1        |
| Lecce                          | 2003-2008       | 918                | 0.0              | 0.0        | 0.1        | 917               | 0.0        | 1.1        | 907               | 37.9                           | 62.8                    | 0.3               | 1.7        |

Web-table 2.5: Data quality indicators, patients diagnosed during 2000-2014, by continent, country and registry: LIVER

|                      | Calendar period | Patients submitted | Ineligible (%) ¶ |         |       | Excluded (%) ¶¶   |      |       | Patients included | Data quality indicators (%) †† |                         |                   |          |
|----------------------|-----------------|--------------------|------------------|---------|-------|-------------------|------|-------|-------------------|--------------------------------|-------------------------|-------------------|----------|
|                      |                 |                    | Incomplete dates | In situ | Other | Eligible patients | DCO  | Other |                   | MV                             | Non-specific morphology | Lost to follow-up | Censored |
| Mantova              | 2000-2010       | 879                | 0.0              | 0.0     | 0.2   | 877               | 2.4  | 4.4   | 817               | 43.1                           | 60.5                    | 0.1               | 0.0      |
| Milano               | 2000-2012       | 5,428              | 0.0              | 0.0     | 0.2   | 5,415             | 0.3  | 0.9   | 5,347             | 66.5                           | 34.5                    | 1.5               | 0.7      |
| Modena               | 2000-2012       | 1,567              | 0.0              | 0.0     | 0.2   | 1,564             | 0.2  | 2.8   | 1,517             | 47.7                           | 52.4                    | 0.0               | 1.1      |
| Monza-Brianza        | 2007-2012       | 1,114              | 0.0              | 0.0     | 0.3   | 1,111             | 0.1  | 0.8   | 1,101             | 34.0                           | 67.2                    | 0.5               | 0.0      |
| Naples               | 2000-2012       | 3,171              | 0.0              | 0.0     | 0.1   | 3,167             | 0.0  | 1.2   | 3,130             | 79.5                           | 21.1                    | 0.8               | 0.8      |
| Nuoro                | 2003-2012       | 635                | 0.0              | 0.0     | 0.2   | 634               | 2.4  | 1.1   | 612               | 37.4                           | 63.6                    | 0.0               | 0.0      |
| Palermo              | 2003-2012       | 2,392              | 0.0              | 0.0     | 0.2   | 2,388             | 6.7  | 1.0   | 2,204             | 41.0                           | 59.3                    | 0.2               | 0.0      |
| Parma                | 2000-2014       | 2,109              | 0.0              | 0.0     | 0.1   | 2,106             | 0.5  | 0.3   | 2,090             | 77.5                           | 25.6                    | 0.9               | 0.0      |
| Pavia                | 2003-2009       | 1,321              | 0.0              | 0.0     | 0.2   | 1,319             | 0.1  | 0.9   | 1,306             | 81.3                           | 20.4                    | 0.2               | 0.5      |
| Piacenza             | 2006-2011       | 530                | 0.0              | 0.0     | 0.4   | 528               | 0.0  | 1.5   | 520               | 62.9                           | 37.3                    | 0.2               | 1.0      |
| Ragusa               | 2000-2012       | 1,015              | 0.0              | 0.0     | 0.9   | 1,006             | 5.8  | 0.8   | 940               | 29.0                           | 74.8                    | 0.1               | 0.0      |
| Reggio Emilia        | 2000-2012       | 1,006              | 0.0              | 0.0     | 0.4   | 1,002             | 0.0  | 1.2   | 990               | 77.3                           | 23.5                    | 1.1               | 0.0      |
| Romagna              | 2000-2012       | 1,925              | 0.0              | 0.0     | 0.3   | 1,919             | 0.3  | 0.4   | 1,906             | 44.3                           | 56.3                    | 0.3               | 0.0      |
| Salerno              | 2000-2009       | 1,886              | 0.0              | 0.0     | 0.0   | 1,886             | 0.0  | 3.2   | 1,825             | 41.9                           | 59.1                    | 0.9               | 2.4      |
| Sassari              | 2000-2011       | 1,178              | 0.0              | 0.0     | 0.1   | 1,177             | 5.5  | 0.5   | 1,106             | 56.2                           | 48.1                    | 0.0               | 0.0      |
| Siracusa             | 2000-2012       | 916                | 0.0              | 0.0     | 0.1   | 915               | 5.4  | 0.4   | 862               | 39.9                           | 61.9                    | 0.0               | 0.9      |
| Sondrio              | 2000-2011       | 597                | 0.0              | 0.0     | 0.2   | 596               | 0.0  | 1.3   | 588               | 45.1                           | 57.1                    | 0.0               | 0.3      |
| Taranto              | 2006-2012       | 804                | 0.0              | 0.0     | 0.1   | 803               | 6.1  | 2.2   | 736               | 39.1                           | 62.9                    | 0.1               | 0.0      |
| Trapani              | 2002-2010       | 465                | 0.0              | 0.0     | 0.4   | 463               | 3.0  | 1.1   | 444               | 39.6                           | 62.6                    | 0.7               | 0.2      |
| Trento               | 2000-2010       | 1,086              | 0.0              | 0.0     | 0.3   | 1,083             | 2.1  | 1.6   | 1,043             | 66.9                           | 37.1                    | 0.9               | 0.0      |
| Turin                | 2000-2012       | 2,333              | 0.0              | 0.0     | 0.9   | 2,312             | 3.2  | 0.0   | 2,237             | 43.2                           | 58.2                    | 0.7               | 0.0      |
| Tuscany              | 2000-2009       | 1,739              | 0.0              | 0.0     | 0.5   | 1,731             | 1.9  | 1.2   | 1,677             | 40.8                           | 61.6                    | 0.0               | 1.1      |
| Umbria               | 2000-2013       | 2,243              | 0.0              | 0.0     | 0.2   | 2,238             | 0.8  | 0.0   | 2,218             | 87.4                           | 12.8                    | 0.2               | 0.0      |
| Varese               | 2000-2012       | 1,942              | 0.0              | 0.0     | 0.2   | 1,938             | 0.7  | 0.1   | 1,922             | 79.0                           | 21.1                    | 0.4               | 0.2      |
| Veneto               | 2000-2009       | 5,259              | 0.0              | 0.0     | 0.0   | 5,257             | 1.5  | 1.8   | 5,082             | 56.2                           | 45.1                    | 0.3               | 0.4      |
| Viterbo              | 2006-2010       | 280                | 0.0              | 0.0     | 0.0   | 280               | 4.3  | 1.1   | 265               | 63.0                           | 37.0                    | 0.0               | 9.8      |
| Piedmont Childhood   | -               | -                  | -                | -       | -     | -                 | -    | -     | -                 | -                              | -                       | -                 | -        |
| Latvia *             | 2000-2014       | 1,029              | 0.0              | 0.0     | 53.4  | 480               | 0.0  | 3.3   | 464               | 99.6                           | 0.4                     | 0.0               | 0.0      |
| Lithuania *          | 2000-2012       | 2,188              | 0.0              | 0.0     | 1.3   | 2,159             | 17.0 | 0.7   | 1,776             | 62.4                           | 1.0                     | 0.0               | 0.2      |
| Malta *              | 2000-2013       | 211                | 0.0              | 0.0     | 5.7   | 199               | 15.1 | 8.5   | 152               | 75.0                           | 27.6                    | 0.0               | 0.0      |
| Netherlands *        | 2000-2014       | 6,600              | 0.0              | 0.1     | 0.0   | 6,596             | 2.0  | 1.0   | 6,397             | 69.7                           | 30.7                    | 0.4               | 0.0      |
| Norway *             | 2000-2014       | 2,582              | 0.0              | 0.2     | 22.8  | 1,989             | 3.6  | 0.1   | 1,916             | 100.0                          | 0.7                     | 0.3               | 0.0      |
| Poland *             | 2000-2014       | 22,986             | 0.0              | 0.0     | 0.0   | 22,975            | 9.2  | 0.4   | 20,764            | 76.3                           | 3.2                     | 0.0               | 0.0      |
| Greater Poland       | 2000-2014       | 2,416              | 0.0              | 0.0     | 0.0   | 2,415             | 17.7 | 0.0   | 1,987             | 83.0                           | 1.1                     | 0.0               | 0.0      |
| Holy Cross           | 2000-2014       | 643                | 0.0              | 0.0     | 0.0   | 643               | 10.4 | 0.3   | 574               | 77.4                           | 2.1                     | 0.0               | 0.0      |
| Kujavia-Pomerania    | 2000-2014       | 1,084              | 0.0              | 0.0     | 0.1   | 1,083             | 2.4  | 0.0   | 1,057             | 94.3                           | 0.5                     | 0.0               | 0.1      |
| Lesser Poland        | 2000-2014       | 1,971              | 0.0              | 0.0     | 0.1   | 1,969             | 12.2 | 0.5   | 1,718             | 83.5                           | 3.4                     | 0.0               | 0.0      |
| Łódź                 | 2000-2014       | 1,557              | 0.0              | 0.0     | 0.1   | 1,556             | 1.9  | 1.6   | 1,501             | 69.2                           | 0.5                     | 0.0               | 0.0      |
| Lower Silesia        | 2000-2014       | 2,718              | 0.0              | 0.0     | 0.0   | 2,718             | 1.1  | 0.6   | 2,672             | 60.3                           | 17.3                    | 0.1               | 0.0      |
| Lublin               | 2000-2014       | 1,264              | 0.0              | 0.0     | 0.0   | 1,264             | 21.4 | 0.2   | 992               | 63.1                           | 0.6                     | 0.0               | 0.0      |
| Lubush               | 2000-2014       | 503                | 0.0              | 0.0     | 0.0   | 503               | 8.2  | 1.0   | 457               | 80.7                           | 3.3                     | 0.0               | 0.0      |
| Mazovia              | 2000-2014       | 2,161              | 0.0              | 0.0     | 0.0   | 2,160             | 0.0  | 0.3   | 2,154             | 78.6                           | 0.6                     | 0.0               | 0.0      |
| Opole                | 2000-2014       | 455                | 0.0              | 0.0     | 0.0   | 455               | 0.2  | 0.2   | 453               | 89.0                           | 1.5                     | 0.0               | 0.0      |
| Podlaha              | 2000-2014       | 775                | 0.0              | 0.0     | 0.0   | 775               | 20.6 | 0.0   | 615               | 62.9                           | 2.3                     | 0.0               | 0.0      |
| Pomerania            | 2000-2014       | 1,685              | 0.0              | 0.0     | 0.0   | 1,685             | 23.4 | 0.2   | 1,286             | 89.7                           | 0.2                     | 0.0               | 0.0      |
| Silesia              | 2000-2014       | 2,990              | 0.0              | 0.0     | 0.0   | 2,989             | 4.2  | 0.3   | 2,854             | 71.1                           | 0.6                     | 0.0               | 0.0      |
| Subcarpathia         | 2000-2014       | 1,179              | 0.0              | 0.0     | 0.1   | 1,178             | 12.7 | 0.2   | 1,026             | 89.9                           | 0.6                     | 0.0               | 0.0      |
| Varmia-Mazuria       | 2000-2014       | 727                | 0.0              | 0.0     | 0.3   | 725               | 2.2  | 0.8   | 703               | 83.9                           | 1.6                     | 0.0               | 0.3      |
| West Pomerania       | 2000-2014       | 858                | 0.0              | 0.0     | 0.1   | 857               | 16.2 | 0.4   | 715               | 68.4                           | 0.1                     | 0.0               | 0.0      |
| Portugal *           | 2000-2014       | 5,629              | 0.6              | 0.2     | 3.2   | 5,406             | 0.3  | 5.2   | 5,107             | 80.5                           | 7.8                     | 1.2               | 0.1      |
| Azores               | 2000-2014       | 179                | 0.0              | 0.0     | 0.6   | 178               | 10.1 | 1.7   | 157               | 58.0                           | 44.6                    | 0.0               | 1.9      |
| Portugal Central     | 2003-2010       | 693                | 0.1              | 0.0     | 0.9   | 686               | 0.0  | 0.0   | 686               | 91.7                           | 9.6                     | 0.3               | 0.0      |
| Portugal North       | 2000-2010       | 1,498              | 2.0              | 0.0     | 3.7   | 1,413             | 0.0  | 7.5   | 1,307             | 90.4                           | 13.2                    | 0.0               | 0.0      |
| Portugal South       | 2000-2014       | 3,259              | 0.0              | 0.3     | 3.7   | 3,129             | 0.0  | 5.5   | 2,957             | 74.7                           | 3.1                     | 2.0               | 0.0      |
| Romania (Cluj)       | 2006-2012       | 826                | 0.0              | 0.0     | 0.7   | 820               | 33.0 | 0.2   | 547               | 84.6                           | 15.7                    | 0.0               | 0.0      |
| Russian registries ‡ | 2000-2014       | 4,131              | 0.0              | 0.0     | 0.8   | 4,098             | 5.1  | 3.2   | 3,757             | 54.6                           | 4.5                     | 1.5               | 0.2      |
| Arkhangelsk          | 2000-2014       | 999                | 0.0              | 0.1     | 0.9   | 989               | 5.0  | 3.3   | 907               | 63.6                           | 7.3                     | 0.8               | 0.0      |
| Karelia              | 2000-2014       | 334                | 0.0              | 0.0     | 0.9   | 331               | 9.4  | 5.4   | 282               | 43.3                           | 4.3                     | 0.7               | 1.4      |
| Omsk                 | 2002-2014       | 448                | 0.0              | 0.0     | 1.6   | 441               | 0.0  | 5.0   | 419               | 93.3                           | 21.2                    | 3.1               | 1.0      |
| Samara               | 2000-2014       | 2,177              | 0.0              | 0.0     | 0.6   | 2,164             | 6.0  | 1.7   | 1,997             | 44.2                           | 0.1                     | 1.7               | 0.0      |
| Tomsk                | 2005-2014       | 173                | 0.0              | 0.0     | 0.0   | 173               | 0.0  | 12.1  | 152               | 50.7                           | 0.0                     | 0.0               | 0.7      |
| Slovakia *           | 2000-2010       | 3,756              | 0.0              | 0.0     | 1.1   | 3,715             | 26.2 | 0.0   | 2,741             | 77.8                           | 23.7                    | 0.0               | 0.0      |
| Slovenia *           | 2000-2013       | 3,009              | 0.0              | 0.0     | 28.3  | 2,157             | 8.9  | 0.0   | 1,964             | 55.0                           | 0.4                     | 0.1               | 0.0      |
| Spanish registries   | 2000-2013       | 12,690             | 0.1              | 0.0     | 0.6   | 12,592            | 5.4  | 0.5   | 11,848            | 50.2                           | 5.8                     | 0.4               | 0.0      |
| Basque Country       | 2000-2013       | 4,573              | 0.0              | 0.0     | 0.2   | 4,563             | 3.4  | 0.2   | 4,400             | 38.6                           | 0.3                     | 0.3               | 0.0      |
| Canaries             | 2000-2011       | 1,813              | 0.0              | 0.0     | 1.0   | 1,795             | 5.1  | 0.2   | 1,699             | 60.5                           | 1.4                     | 0.4               | 0.1      |
| Girona               | 2000-2013       | 1,211              | 0.9              | 0.1     | 2.5   | 1,169             | 7.7  | 0.2   | 1,077             | 67.8                           | 33.1                    | 1.5               | 0.0      |
| Granada              | 2000-2012       | 1,211              | 0.0              | 0.0     | 0.2   | 1,208             | 8.4  | 0.0   | 1,106             | 26.9                           | 0.4                     | 0.2               | 0.0      |
| Mallorca             | 2000-2012       | 1,096              | 0.2              | 0.0     | 1.8   | 1,074             | 4.9  | 0.1   | 1,020             | 42.6                           | 1.6                     | 1.3               | 0.0      |
| Murcia               | 2000-2010       | 1,190              | 0.0              | 0.0     | 0.0   | 1,190             | 6.4  | 3.2   | 1,076             | 76.1                           | 24.6                    | 0.0               | 0.1      |
| Navarra              | 2000-2010       | 670                | 0.0              | 0.0     | 0.1   | 669               | 5.1  | 0.0   | 635               | 55.9                           | 0.2                     | 0.0               | 0.0      |
| Tarragona            | 2000-2011       | 926                | 0.2              | 0.0     | 0.0   | 924               | 8.4  | 1.2   | 835               | 70.7                           | 0.7                     | 0.0               | 0.0      |
| Spain Childhood      | -               | -                  | -                | -       | -     | -                 | -    | -     | -                 | -                              | -                       | -                 | -        |
| Valencia Childhood   | -               | -                  | -                | -       | -     | -                 | -    | -     | -                 | -                              | -                       | -                 | -        |
| Sweden *             | 2000-2014       | 8,274              | 0.0              | 0.1     | 3.9   | 7,947             | 7.3  | 1.5   | 7,242             | 89.3                           | 12.4                    | 0.1               | 0.0      |
| Swiss registries     | 2000-2014       | 5,414              | 0.0              | 0.0     | 1.6   | 5,330             | 2.9  | 2.0   | 5,070             | 75.0                           | 10.6                    | 1.1               | 1.0      |
| Basel                | 2000-2011       | 231                | 0.0              | 0.0     | 0.0   | 231               | 0.9  | 28.1  | 164               | 100.0                          | 0.0                     | 0.6               | 0.6      |
| Fribourg             | 2006-2014       | 210                | 0.0              | 0.0     | 2.4   | 205               | 0.0  | 5.9   | 193               | 78.2                           | 22.3                    | 0.5               | 0.0      |
| Geneva               | 2000-2013       | 789                | 0.0              | 0.0     | 0.3   | 787               | 3.6  | 0.4   | 756               | 48.3                           | 52.4                    | 1.3               | 0.0      |
| Graubünden-Glarus    | 2000-2014       | 273                | 0.0              | 0.0     | 2.2   | 267               | 1.1  | 0.0   | 264               | 57.6                           | 0.0                     | 8.0               | 0.0      |
| Neuchâtel            | 2000-2014       | 291                | 0.0              | 0.0     | 4.5   | 278               | 4.3  | 0.4   | 265               | 47.9                           | 7.2                     | 0.4               | 1.1      |
| St Gallen-Appenzell  | 2000-2014       | 568                | 0.0              | 0.0     | 3.9   | 546               | 0.4  | 0.0   | 544               | 66.7                           | 0.0                     | 0.6               | 0.0      |
| Ticino               | 2000-2014       | 934                | 0.0              | 0.0     | 0.1   | 933               | 4.3  | 0.1   | 892               | 98.4                           | 1.7                     | 0.8               | 0.0      |
| Valais               | 2000-2014       | 651                | 0.0              | 0.0     | 0.3   | 649               | 1.2  | 0.0   | 641               | 49.1                           | 0.2                     | 0.8               | 0.0      |

Web-table 2.5: Data quality indicators, patients diagnosed during 2000-2014, by continent, country and registry: LIVER

|                              | Calendar period | Patients submitted | Ineligible (%) ¶ |            |            | Eligible patients | Excluded (%) ¶¶ |            | Patients included | Data quality indicators (%) †† |                         |                   |            |
|------------------------------|-----------------|--------------------|------------------|------------|------------|-------------------|-----------------|------------|-------------------|--------------------------------|-------------------------|-------------------|------------|
|                              |                 |                    | Incomplete dates | In situ    | Other      |                   | DCO             | Other      |                   | MV                             | Non-specific morphology | Lost to follow-up | Censored   |
| Zürich                       | 2000-2013       | 1,467              | 0.0              | 0.0        | 2.2        | 1,434             | 4.0             | 1.8        | 1,351             | 95.4                           | 4.7                     | 0.4               | 3.6        |
| Switzerland (Childhood) †    | -               | -                  |                  |            |            |                   |                 |            |                   |                                |                         |                   |            |
| United Kingdom *             | 2000-2014       | 63,017             | 0.2              | 0.7        | 8.4        | 57,189            | 4.9             | 0.9        | 53,905            | 86.7                           | 7.3                     | 0.7               | 0.0        |
| England                      | 2000-2014       | 48,203             | 0.2              | 0.9        | 1.3        | 47,033            | 5.3             | 1.0        | 44,066            | 93.3                           | 7.3                     | 0.8               | 0.0        |
| Northern Ireland             | 2000-2014       | 1,216              | 0.0              | 0.0        | 1.9        | 1,193             | 2.7             | 0.6        | 1,154             | 51.5                           | 50.7                    | 0.0               | 0.0        |
| Scotland                     | 2000-2014       | 10,274             | 0.0              | 0.0        | 43.2       | 5,829             | 1.1             | 0.0        | 5,763             | 37.6                           | 0.3                     | 0.1               | 0.0        |
| Wales                        | 2000-2014       | 3,324              | 0.0              | 0.3        | 5.4        | 3,134             | 5.4             | 1.4        | 2,922             | 97.1                           | 3.6                     | 0.0               | 0.0        |
| <b>OCEANIA</b>               |                 | <b>21,836</b>      | <b>0.7</b>       | <b>0.0</b> | <b>0.9</b> | <b>21,490</b>     | <b>4.6</b>      | <b>0.9</b> | <b>20,311</b>     | <b>85.7</b>                    | <b>10.7</b>             | <b>0.0</b>        | <b>0.0</b> |
| Australia *                  | 2000-2014       | 18,494             | 0.8              | 0.0        | 1.1        | 18,148            | 3.8             | 1.0        | 17,281            | 83.7                           | 12.1                    | 0.0               | 0.0        |
| Australian Capital Territory | 2000-2013       | 213                | 0.0              | 0.0        | 2.3        | 208               | 5.8             | 0.0        | 196               | 100.0                          | 0.0                     | 0.0               | 0.0        |
| New South Wales              | 2000-2012       | 5,806              | 0.6              | 0.0        | 0.8        | 5,720             | 4.1             | 0.1        | 5,485             | 99.2                           | 1.0                     | 0.0               | 0.0        |
| Northern Territory           | 2000-2013       | 178                | 0.0              | 0.0        | 1.7        | 175               | 1.1             | 0.6        | 172               | 36.0                           | 0.0                     | 0.0               | 0.0        |
| Queensland                   | 2000-2014       | 3,724              | 2.9              | 0.1        | 3.0        | 3,500             | 3.3             | 1.0        | 3,351             | 98.9                           | 1.7                     | 0.0               | 0.0        |
| South Australia              | 2000-2013       | 1,344              | 0.1              | 0.0        | 0.9        | 1,331             | 0.2             | 2.0        | 1,301             | 48.7                           | 0.5                     | 0.0               | 0.0        |
| Tasmania                     | 2000-2013       | 360                | 0.0              | 0.0        | 4.2        | 345               | 6.7             | 3.5        | 310               | 73.9                           | 29.0                    | 0.0               | 0.0        |
| Victoria                     | 2000-2014       | 5,246              | 0.0              | 0.0        | 0.0        | 5,246             | 5.5             | 0.2        | 4,946             | 62.8                           | 37.3                    | 0.0               | 0.0        |
| Western Australia            | 2000-2014       | 1,623              | 0.0              | 0.0        | 0.0        | 1,623             | 0.8             | 5.5        | 1,520             | 97.6                           | 2.4                     | 0.0               | 0.0        |
| New Zealand *                | 2000-2014       | 3,342              | 0.0              | 0.0        | 0.0        | 3,342             | 9.2             | 0.1        | 3,030             | 97.2                           | 2.9                     | 0.0               | 0.0        |
| <b>Total</b>                 |                 | <b>1,307,122</b>   | <b>0.6</b>       | <b>0.0</b> | <b>1.2</b> | <b>1,283,449</b>  | <b>7.1</b>      | <b>1.1</b> | <b>1,178,364</b>  | <b>76.4</b>                    | <b>13.4</b>             | <b>0.3</b>        | <b>0.5</b> |

Web-table 2.6: Data quality indicators, patients diagnosed during 2000-2014, by continent, country and registry: PANCREAS

|                                    | Calendar period | Patients submitted | Ineligible (%) ¶ |            |            | Excluded (%) ¶¶   |             |            | Patients included | Data quality indicators (%) †† |                         |                   |             |
|------------------------------------|-----------------|--------------------|------------------|------------|------------|-------------------|-------------|------------|-------------------|--------------------------------|-------------------------|-------------------|-------------|
|                                    |                 |                    | Incomplete dates | In situ    | Other      | Eligible patients | DCO         | Other      |                   | MV                             | Non-specific morphology | Lost to follow-up | Censored    |
| <b>AFRICA</b>                      |                 | <b>452</b>         | <b>8.8</b>       | <b>0.0</b> | <b>0.2</b> | <b>411</b>        | <b>5.4</b>  | <b>2.4</b> | <b>379</b>        | <b>65.7</b>                    | <b>28.2</b>             | <b>2.4</b>        | <b>26.6</b> |
| Algerian registries                | 2000-2014       | 342                | 11.7             | 0.0        | 0.3        | 301               | 7.3         | 2.3        | 272               | 78.7                           | 11.8                    | 0.0               | 29.0        |
| Annaba                             | 2000-2014       | 111                | 1.8              | 0.0        | 0.9        | 108               | 8.3         | 4.6        | 94                | 38.3                           | 1.1                     | 0.0               | 73.4        |
| Sétif                              | 2000-2012       | 120                | 31.7             | 0.0        | 0.0        | 82                | 0.0         | 0.0        | 82                | 100.0                          | 1.2                     | 0.0               | 12.2        |
| Tlemcen                            | 2006-2014       | 111                | 0.0              | 0.0        | 0.0        | 111               | 11.7        | 1.8        | 96                | 100.0                          | 31.3                    | 0.0               | 0.0         |
| Mali (Bamako)                      | -               | -                  | -                | -          | -          | -                 | -           | -          | -                 | -                              | -                       | -                 | -           |
| Mauritius *                        | 2010-2012       | 48                 | 0.0              | 0.0        | 0.0        | 48                | 0.0         | 6.3        | 45                | 71.1                           | 35.6                    | 0.0               | 0.0         |
| Morocco (Casablanca)               | -               | -                  | -                | -          | -          | -                 | -           | -          | -                 | -                              | -                       | -                 | -           |
| Nigeria (Ibadan)                   | -               | -                  | -                | -          | -          | -                 | -           | -          | -                 | -                              | -                       | -                 | -           |
| South Africa (Eastern Cape)        | 2000-2014       | 62                 | 0.0              | 0.0        | 0.0        | 62                | 0.0         | 0.0        | 62                | 4.8                            | 95.2                    | 14.5              | 35.5        |
| <b>AMERICA (Central and South)</b> |                 | <b>22,638</b>      | <b>4.5</b>       | <b>0.1</b> | <b>0.3</b> | <b>21,548</b>     | <b>26.4</b> | <b>0.6</b> | <b>15,731</b>     | <b>62.6</b>                    | <b>36.9</b>             | <b>1.9</b>        | <b>1.1</b>  |
| Argentinian registries             | 2002-2013       | 2,796              | 1.1              | 0.0        | 0.1        | 2,759             | 39.5        | 0.4        | 1,657             | 72.4                           | 22.3                    | 0.0               | 0.0         |
| Chubut                             | 2008-2013       | 150                | 21.3             | 0.0        | 0.7        | 117               | 23.9        | 0.9        | 88                | 46.6                           | 59.1                    | 0.0               | 0.0         |
| Córdoba                            | 2004-2012       | 1,056              | 0.0              | 0.1        | 0.2        | 1,053             | 33.9        | 0.3        | 693               | 72.0                           | 30.7                    | 0.0               | 0.0         |
| Mendoza                            | 2003-2013       | 1,590              | 0.0              | 0.0        | 0.1        | 1,589             | 44.4        | 0.4        | 876               | 75.3                           | 12.0                    | 0.0               | 0.0         |
| Tierra del Fuego                   | -               | -                  | -                | -          | -          | -                 | -           | -          | -                 | -                              | -                       | -                 | -           |
| Argentina (Childhood) †            | -               | -                  | -                | -          | -          | -                 | -           | -          | -                 | -                              | -                       | -                 | -           |
| Brazilian registries               | 2000-2014       | 7,961              | 8.7              | 0.1        | 0.1        | 7,258             | 23.0        | 0.9        | 5,520             | 65.0                           | 35.9                    | 5.1               | 0.0         |
| Aracaju                            | 2000-2012       | 242                | 0.4              | 0.4        | 0.0        | 240               | 38.8        | 0.0        | 147               | 74.8                           | 25.2                    | 0.0               | 0.0         |
| Cuiabá                             | -               | -                  | -                | -          | -          | -                 | -           | -          | -                 | -                              | -                       | -                 | -           |
| Curitiba                           | 2000-2012       | 1,214              | 0.0              | 0.0        | 0.2        | 1,212             | 43.0        | 0.2        | 689               | 83.7                           | 17.6                    | 0.0               | 0.0         |
| Goiânia                            | 2000-2012       | 543                | 2.9              | 0.2        | 0.4        | 524               | 30.2        | 2.1        | 355               | 92.1                           | 14.4                    | 0.3               | 0.0         |
| Jaú                                | 2000-2014       | 121                | 0.0              | 0.0        | 0.0        | 121               | 5.0         | 0.0        | 115               | 76.5                           | 26.1                    | 0.0               | 0.0         |
| São Paulo                          | 2000-2012       | 5,841              | 11.6             | 0.1        | 0.0        | 5,161             | 17.3        | 1.1        | 4,214             | 59.0                           | 41.3                    | 6.6               | 0.0         |
| Chilean registries                 | 2000-2012       | 967                | 0.0              | 0.0        | 0.2        | 965               | 17.7        | 0.1        | 793               | 33.4                           | 48.3                    | 0.0               | 0.6         |
| Antofagasta                        | 2003-2010       | 206                | 0.0              | 0.0        | 1.0        | 204               | 35.8        | 0.0        | 131               | 45.8                           | 55.0                    | 0.0               | 0.0         |
| Biobio                             | 2003-2012       | 231                | 0.0              | 0.0        | 0.0        | 231               | 8.2         | 0.0        | 212               | 16.0                           | 85.4                    | 0.0               | 0.5         |
| Concepción                         | 2006-2010       | 267                | 0.0              | 0.0        | 0.0        | 267               | 18.4        | 0.4        | 217               | 42.4                           | 59.0                    | 0.0               | 1.4         |
| Los Rios                           | 2000-2012       | 263                | 0.0              | 0.0        | 0.0        | 263               | 11.4        | 0.0        | 233               | 33.9                           | 0.9                     | 0.0               | 0.4         |
| Colombian registries               | 2000-2014       | 1,586              | 2.2              | 0.0        | 0.6        | 1,542             | 14.9        | 0.6        | 1,303             | 54.8                           | 44.1                    | 0.0               | 9.3         |
| Bucaramanga                        | -               | -                  | -                | -          | -          | -                 | -           | -          | -                 | -                              | -                       | -                 | -           |
| Cali                               | 2000-2014       | 1,293              | 0.2              | 0.0        | 0.7        | 1,282             | 13.8        | 0.6        | 1,097             | 56.4                           | 41.8                    | 0.0               | 9.7         |
| Manizales                          | 2003-2012       | 110                | 26.4             | 0.0        | 0.0        | 81                | 9.9         | 1.2        | 72                | 61.1                           | 40.3                    | 0.0               | 20.8        |
| Pasto                              | 2000-2012       | 183                | 2.2              | 0.0        | 0.0        | 179               | 25.1        | 0.0        | 134               | 38.1                           | 64.2                    | 0.0               | 0.0         |
| Costa Rica *                       | 2002-2014       | 1,845              | 0.0              | 0.0        | 0.2        | 1,841             | 34.2        | 1.2        | 1,188             | 55.6                           | 51.3                    | 0.0               | 0.0         |
| Cuba *                             | -               | -                  | -                | -          | -          | -                 | -           | -          | -                 | -                              | -                       | -                 | -           |
| Ecuadorian registries              | 2000-2013       | 1,626              | 6.4              | 0.1        | 0.7        | 1,509             | 28.4        | 0.8        | 1,069             | 50.0                           | 52.5                    | 0.4               | 1.1         |
| Cuenca                             | 2000-2012       | 197                | 26.4             | 0.0        | 0.0        | 145               | 22.8        | 4.8        | 105               | 49.5                           | 52.4                    | 0.0               | 8.6         |
| Guayaquil                          | 2005-2013       | 464                | 0.0              | 0.0        | 2.6        | 452               | 28.5        | 1.1        | 318               | 48.7                           | 53.1                    | 0.0               | 0.0         |
| Loja                               | 2000-2013       | 79                 | 0.0              | 0.0        | 0.0        | 79                | 8.9         | 0.0        | 72                | 40.3                           | 62.5                    | 5.6               | 0.0         |
| Manabí                             | 2000-2013       | 214                | 10.3             | 0.0        | 0.0        | 192               | 32.8        | 0.0        | 129               | 39.5                           | 62.0                    | 0.0               | 0.0         |
| Quito                              | 2000-2013       | 672                | 4.5              | 0.1        | 0.0        | 641               | 30.6        | 0.0        | 445               | 55.5                           | 47.6                    | 0.0               | 0.7         |
| Guadeloupe *                       | 2008-2013       | 168                | 0.0              | 0.0        | 0.6        | 167               | 0.0         | 0.0        | 167               | 77.2                           | 40.7                    | 0.0               | 19.2        |
| Martinique *                       | 2000-2012       | 479                | 0.0              | 0.0        | 0.2        | 478               | 0.0         | 1.0        | 473               | 63.6                           | 7.8                     | 4.4               | 0.0         |
| Mexico (Childhood) †               | -               | -                  | -                | -          | -          | -                 | -           | -          | -                 | -                              | -                       | -                 | -           |
| Peru (Lima)                        | -               | -                  | -                | -          | -          | -                 | -           | -          | -                 | -                              | -                       | -                 | -           |
| Puerto Rico *                      | 2000-2011       | 2,728              | 5.2              | 0.1        | 1.0        | 2,554             | 22.0        | 0.3        | 1,984             | 90.4                           | 14.4                    | 0.0               | 0.0         |
| Uruguay *                          | 2008-2012       | 2,482              | 0.1              | 0.0        | 0.1        | 2,475             | 36.2        | 0.1        | 1,577             | 42.4                           | 59.1                    | 0.0               | 0.0         |
| <b>AMERICA (North)</b>             |                 | <b>492,086</b>     | <b>0.5</b>       | <b>0.4</b> | <b>0.5</b> | <b>485,358</b>    | <b>4.6</b>  | <b>0.2</b> | <b>462,187</b>    | <b>90.1</b>                    | <b>11.6</b>             | <b>0.2</b>        | <b>0.0</b>  |
| Canadian registries                | 2000-2014       | 43,985             | 0.1              | 0.2        | 0.4        | 43,679            | 3.8         | 0.2        | 41,908            | 76.3                           | 23.3                    | 0.0               | 0.0         |
| Alberta                            | 2000-2014       | 5,399              | 0.3              | 0.4        | 0.5        | 5,338             | 0.6         | 0.2        | 5,292             | 86.4                           | 15.3                    | 0.0               | 0.0         |
| British Columbia                   | 2000-2014       | 8,225              | 0.3              | 0.5        | 1.2        | 8,068             | 4.1         | 0.2        | 7,723             | 86.4                           | 14.5                    | 0.0               | 0.0         |
| Manitoba                           | 2000-2014       | 2,278              | 0.0              | 0.4        | 0.4        | 2,261             | 2.8         | 0.2        | 2,193             | 83.1                           | 17.7                    | 0.0               | 0.0         |
| New Brunswick                      | 2000-2014       | 1,697              | 0.0              | 0.3        | 0.8        | 1,679             | 0.7         | 0.1        | 1,667             | 61.6                           | 0.8                     | 0.0               | 0.0         |
| Newfoundland & Labrador            | 2000-2014       | 692                | 0.3              | 0.0        | 1.0        | 683               | 4.7         | 0.3        | 649               | 72.9                           | 29.7                    | 0.0               | 0.0         |
| Nova Scotia                        | 2000-2014       | 1,951              | 0.5              | 0.6        | 0.4        | 1,922             | 1.1         | 0.2        | 1,897             | 57.0                           | 44.4                    | 0.0               | 0.0         |
| Ontario                            | 2000-2014       | 21,496             | 0.0              | 0.0        | 0.0        | 21,496            | 5.0         | 0.3        | 20,357            | 72.0                           | 29.1                    | 0.0               | 0.0         |
| Prince Edward Island               | 2000-2014       | 282                | 0.0              | 0.0        | 0.4        | 281               | 3.2         | 0.0        | 272               | 64.7                           | 37.9                    | 0.0               | 0.0         |
| Saskatchewan                       | 2000-2014       | 1,965              | 0.0              | 0.2        | 0.5        | 1,951             | 4.6         | 0.2        | 1,858             | 81.4                           | 19.8                    | 0.0               | 0.0         |
| US registries                      | 2000-2014       | 448,101            | 0.5              | 0.4        | 0.5        | 441,679           | 4.6         | 0.2        | 420,279           | 91.4                           | 10.4                    | 0.3               | 0.0         |
| Alabama                            | 2000-2014       | 9,110              | 0.8              | 0.4        | 0.5        | 8,953             | 4.0         | 0.2        | 8,573             | 90.8                           | 10.6                    | 0.0               | 0.0         |
| Alaska                             | 2000-2013       | 807                | 2.0              | 0.5        | 0.6        | 782               | 2.4         | 0.3        | 761               | 88.2                           | 14.6                    | 0.0               | 0.0         |
| Arkansas                           | 2000-2011       | 4,035              | 0.1              | 0.1        | 0.7        | 3,998             | 7.1         | 0.1        | 3,711             | 93.0                           | 8.7                     | 0.0               | 0.0         |
| California                         | 2000-2011       | 45,362             | 1.2              | 0.3        | 0.5        | 44,466            | 2.0         | 0.2        | 43,490            | 91.6                           | 9.9                     | 0.0               | 0.0         |
| Greater Bay Area                   | 2000-2014       | 11,864             | 0.7              | 0.5        | 0.3        | 11,692            | 3.3         | 0.2        | 11,288            | 93.9                           | 7.2                     | 1.6               | 0.0         |
| Greater California                 | 2000-2014       | 32,649             | 1.3              | 0.3        | 0.5        | 31,965            | 1.6         | 0.3        | 31,383            | 90.6                           | 11.0                    | 1.5               | 0.0         |
| Los Angeles                        | 2000-2014       | 14,742             | 1.2              | 0.4        | 0.5        | 14,440            | 2.2         | 0.2        | 14,087            | 92.6                           | 8.7                     | 3.3               | 0.0         |
| Colorado                           | 2000-2013       | 6,646              | 0.2              | 0.4        | 0.3        | 6,583             | 6.1         | 0.2        | 6,168             | 90.4                           | 11.1                    | 0.0               | 0.0         |
| Connecticut                        | 2000-2014       | 8,125              | 0.1              | 0.7        | 0.3        | 8,038             | 3.0         | 0.2        | 7,782             | 94.1                           | 8.1                     | 1.1               | 0.0         |
| Delaware                           | 2000-2014       | 1,894              | 0.3              | 1.0        | 0.4        | 1,863             | 4.8         | 0.1        | 1,771             | 93.7                           | 7.7                     | 0.0               | 0.0         |
| Florida                            | 2000-2013       | 38,520             | 0.1              | 0.6        | 0.5        | 38,064            | 6.8         | 0.3        | 35,379            | 91.4                           | 12.6                    | 0.0               | 0.0         |
| Georgia                            | 2000-2014       | 14,936             | 0.0              | 0.4        | 0.5        | 14,798            | 4.0         | 0.2        | 14,171            | 92.4                           | 9.3                     | 0.0               | 0.0         |
| Atlanta                            | 2000-2014       | 4,320              | 0.0              | 0.4        | 0.5        | 4,280             | 3.2         | 0.3        | 4,131             | 94.7                           | 6.9                     | 0.0               | 0.0         |
| Hawaii                             | 2000-2014       | 2,934              | 0.4              | 0.4        | 0.5        | 2,895             | 5.3         | 0.2        | 2,737             | 86.0                           | 16.3                    | 0.7               | 0.0         |
| Idaho                              | 2000-2014       | 2,671              | 0.2              | 0.4        | 0.6        | 2,637             | 6.9         | 0.3        | 2,446             | 91.3                           | 9.6                     | 0.0               | 0.0         |
| Indiana                            | 2000-2014       | 12,150             | 0.4              | 0.6        | 0.5        | 11,976            | 3.1         | 0.2        | 11,573            | 91.7                           | 9.4                     | 0.0               | 0.0         |
| Iowa                               | 2000-2014       | 6,475              | 0.5              | 0.2        | 0.5        | 6,395             | 3.6         | 0.2        | 6,150             | 89.8                           | 11.2                    | 0.2               | 0.0         |
| Kentucky                           | 2000-2014       | 8,274              | 0.0              | 0.5        | 0.4        | 8,199             | 2.5         | 0.2        | 7,978             | 88.6                           | 12.4                    | 0.2               | 0.0         |
| Louisiana                          | 2000-2014       | 9,145              | 0.3              | 0.2        | 0.4        | 9,063             | 3.7         | 0.2        | 8,711             | 90.0                           | 11.1                    | 0.5               | 0.0         |
| Maine                              | 2000-2013       | 2,890              | 0.0              | 0.3        | 0.5        | 2,865             | 3.7         | 0.1        | 2,755             | 91.6                           | 9.4                     | 0.0               | 0.0         |
| Massachusetts                      | 2000-2009       | 8,816              | 0.0              | 0.6        | 0.3        | 8,730             | 5.9         | 0.1        | 8,205             | 87.5                           | 13.5                    | 0.0               | 0.0         |
| Michigan                           | 2000-2013       | 19,234             | 0.3              | 0.4        | 0.6        | 18,988            | 2.5         | 0.2        | 18,476            | 89.3                           | 12.2                    | 0.0               | 0.0         |

Web-table 2.6: Data quality indicators, patients diagnosed during 2000-2014, by continent, country and registry: PANCREAS

|                     | Calendar period | Patients submitted | Ineligible (%) ¶ |            |            | Excluded (%) ¶¶   |             |            | Patients included | Data quality indicators (%) †† |                         |                   |            |
|---------------------|-----------------|--------------------|------------------|------------|------------|-------------------|-------------|------------|-------------------|--------------------------------|-------------------------|-------------------|------------|
|                     |                 |                    | Incomplete dates | In situ    | Other      | Eligible patients | DCO         | Other      |                   | MV                             | Non-specific morphology | Lost to follow-up | Censored   |
| Detroit             | 2000-2014       | 9,315              | 0.5              | 0.4        | 0.5        | 9,184             | 4.0         | 0.2        | 8,802             | 95.4                           | 5.4                     | 0.7               | 0.0        |
| Minnesota           | 2000-2013       | 7,877              | 0.0              | 0.4        | 0.4        | 7,807             | 5.9         | 0.3        | 7,326             | 99.6                           | 1.2                     | 0.0               | 0.0        |
| Mississippi         | 2002-2014       | 5,069              | 0.2              | 0.3        | 0.6        | 5,016             | 5.1         | 0.3        | 4,745             | 91.7                           | 9.6                     | 0.0               | 0.0        |
| Missouri            | -               | -                  | -                | -          | -          | -                 | -           | -          | -                 | -                              | -                       | -                 | -          |
| Montana             | 2000-2014       | 1,883              | 0.5              | 0.4        | 0.6        | 1,854             | 7.0         | 0.2        | 1,721             | 91.9                           | 8.9                     | 0.0               | 0.0        |
| Nebraska            | 2000-2014       | 3,348              | 0.4              | 0.4        | 0.6        | 3,300             | 3.3         | 0.2        | 3,184             | 89.7                           | 11.4                    | 0.0               | 0.0        |
| New Hampshire       | 2000-2014       | 2,621              | 0.2              | 0.4        | 0.3        | 2,597             | 4.8         | 0.0        | 2,472             | 89.8                           | 11.5                    | 0.0               | 0.0        |
| New Jersey          | 2000-2014       | 19,096             | 0.9              | 0.5        | 0.4        | 18,762            | 3.9         | 0.2        | 17,996            | 92.5                           | 9.1                     | 4.7               | 0.0        |
| New Mexico          | 2000-2014       | 3,333              | 0.1              | 0.1        | 0.7        | 3,305             | 8.4         | 0.3        | 3,020             | 89.8                           | 13.3                    | 1.0               | 0.1        |
| New York            | 2000-2014       | 42,872             | 1.8              | 0.7        | 0.4        | 41,640            | 3.3         | 0.2        | 40,188            | 93.0                           | 8.4                     | 0.0               | 0.0        |
| New York City       | 2000-2014       | 16,199             | 2.6              | 0.6        | 0.3        | 15,615            | 2.7         | 0.3        | 15,145            | 94.9                           | 6.4                     | 0.0               | 0.0        |
| North Carolina      | 2000-2014       | 16,780             | 0.0              | 0.3        | 0.4        | 16,652            | 5.0         | 0.2        | 15,779            | 92.9                           | 8.6                     | 0.0               | 0.0        |
| Ohio                | 2000-2014       | 23,312             | 0.0              | 0.5        | 0.4        | 23,093            | 7.6         | 0.2        | 21,290            | 91.5                           | 11.7                    | 0.0               | 0.0        |
| Oklahoma            | 2000-2010       | 4,656              | 0.3              | 0.2        | 0.5        | 4,613             | 5.3         | 0.2        | 4,358             | 90.2                           | 12.1                    | 0.0               | 0.0        |
| Oregon              | 2000-2013       | 6,731              | 0.0              | 0.4        | 0.6        | 6,658             | 3.0         | 0.2        | 6,449             | 84.1                           | 18.1                    | 0.0               | 0.0        |
| Pennsylvania        | 2000-2014       | 29,851             | 0.5              | 0.4        | 0.4        | 29,456            | 4.4         | 0.2        | 28,111            | 92.6                           | 8.7                     | 0.0               | 0.0        |
| Rhode Island        | 2000-2014       | 2,218              | 0.0              | 0.4        | 0.5        | 2,197             | 4.6         | 0.2        | 2,091             | 88.5                           | 12.4                    | 0.0               | 0.0        |
| South Carolina      | 2000-2014       | 8,874              | 0.0              | 0.3        | 0.4        | 8,814             | 5.2         | 0.1        | 8,340             | 88.6                           | 12.6                    | 0.0               | 0.0        |
| Tennessee           | 2000-2011       | 8,191              | 0.2              | 0.3        | 0.5        | 8,111             | 7.7         | 0.2        | 7,468             | 92.2                           | 9.0                     | 0.0               | 0.0        |
| Texas               | 2000-2013       | 33,395             | 0.6              | 0.3        | 0.6        | 32,868            | 7.3         | 0.3        | 30,379            | 91.9                           | 10.7                    | 0.0               | 0.0        |
| Utah                | 2000-2014       | 3,064              | 0.4              | 0.4        | 0.9        | 3,012             | 0.7         | 0.4        | 2,978             | 87.3                           | 14.7                    | 0.7               | 0.0        |
| Vermont             | 2000-2013       | 1,194              | 0.3              | 0.2        | 0.4        | 1,184             | 3.6         | 0.0        | 1,141             | 93.7                           | 7.4                     | 0.0               | 0.0        |
| Washington          | 2000-2008       | 6,617              | 0.5              | 0.6        | 0.6        | 6,509             | 2.2         | 0.2        | 6,357             | 89.4                           | 11.9                    | 0.0               | 0.0        |
| Seattle             | 2000-2014       | 8,304              | 0.5              | 0.7        | 0.5        | 8,160             | 1.2         | 0.1        | 8,051             | 91.0                           | 9.7                     | 0.5               | 0.0        |
| West Virginia       | 2000-2014       | 3,779              | 0.5              | 0.3        | 0.6        | 3,726             | 3.7         | 0.2        | 3,584             | 86.0                           | 15.5                    | 0.0               | 0.0        |
| Wisconsin           | 2000-2013       | 10,568             | 0.3              | 0.4        | 0.2        | 10,469            | 6.8         | 0.2        | 9,736             | 92.5                           | 9.3                     | 0.0               | 0.0        |
| Wyoming             | 2000-2013       | 748                | 0.1              | 0.3        | 0.3        | 743               | 1.7         | 0.1        | 729               | 89.4                           | 12.1                    | 0.0               | 0.0        |
| <b>ASIA</b>         |                 | <b>236,135</b>     | <b>0.3</b>       | <b>0.3</b> | <b>0.3</b> | <b>233,976</b>    | <b>12.0</b> | <b>0.3</b> | <b>205,345</b>    | <b>55.8</b>                    | <b>41.5</b>             | <b>0.1</b>        | <b>0.4</b> |
| Chinese registries  | 2003-2013       | 19,644             | 0.4              | 0.0        | 0.1        | 19,542            | 2.2         | 0.0        | 19,110            | 31.4                           | 73.4                    | 1.3               | 0.1        |
| Beijing             | 2003-2013       | 7,286              | 0.1              | 0.0        | 0.0        | 7,279             | 1.3         | 0.1        | 7,181             | 38.8                           | 61.3                    | 2.0               | 0.2        |
| Changle             | 2003-2013       | 183                | 1.1              | 0.0        | 0.0        | 181               | 1.7         | 0.6        | 177               | 31.1                           | 80.8                    | 2.8               | 0.0        |
| Cixian              | 2003-2013       | 143                | 0.0              | 0.0        | 0.0        | 143               | 0.7         | 0.0        | 142               | 73.9                           | 26.8                    | 0.0               | 0.0        |
| Dafeng              | 2003-2013       | 572                | 0.0              | 0.0        | 0.0        | 572               | 0.5         | 0.0        | 569               | 34.1                           | 75.6                    | 0.0               | 0.0        |
| Dalian              | 2003-2013       | 2,714              | 0.0              | 0.0        | 0.0        | 2,714             | 9.5         | 0.0        | 2,456             | 26.5                           | 79.6                    | 0.0               | 0.0        |
| Donghai             | 2003-2013       | 372                | 0.0              | 0.0        | 0.0        | 372               | 3.0         | 0.0        | 361               | 30.5                           | 70.1                    | 5.5               | 0.0        |
| Feicheng            | 2003-2013       | 270                | 0.0              | 0.0        | 0.0        | 270               | 0.4         | 0.0        | 269               | 23.8                           | 77.7                    | 3.0               | 0.0        |
| Ganyu               | 2003-2013       | 385                | 0.0              | 0.0        | 0.0        | 385               | 0.8         | 0.0        | 382               | 17.0                           | 88.2                    | 0.3               | 0.3        |
| Guanyun             | 2004-2013       | 389                | 0.0              | 0.0        | 0.0        | 389               | 1.0         | 0.0        | 385               | 43.6                           | 90.1                    | 2.1               | 0.0        |
| Haimen              | 2003-2013       | 1,312              | 0.0              | 0.0        | 0.1        | 1,311             | 0.2         | 0.0        | 1,308             | 13.1                           | 86.9                    | 0.1               | 0.0        |
| Haining             | 2003-2013       | 812                | 0.0              | 0.0        | 0.1        | 811               | 2.5         | 0.1        | 790               | 20.6                           | 90.8                    | 0.6               | 0.0        |
| Jianhu              | 2003-2013       | 508                | 0.0              | 0.0        | 0.0        | 508               | 0.0         | 0.0        | 508               | 31.9                           | 99.2                    | 2.4               | 0.0        |
| Jiashan             | 2003-2013       | 634                | 0.0              | 0.0        | 0.0        | 634               | 0.2         | 0.0        | 633               | 33.0                           | 67.0                    | 0.2               | 0.0        |
| Jintan              | 2003-2013       | 400                | 0.0              | 0.0        | 1.0        | 396               | 1.0         | 0.0        | 392               | 36.2                           | 63.8                    | 1.5               | 0.0        |
| Lianyungang         | 2008-2013       | 311                | 0.0              | 0.0        | 0.3        | 310               | 2.3         | 0.0        | 303               | 51.8                           | 62.4                    | 6.3               | 0.0        |
| Linzhou             | 2003-2013       | 185                | 0.0              | 0.0        | 0.5        | 184               | 2.2         | 0.0        | 180               | 50.0                           | 50.0                    | 0.0               | 0.0        |
| Qidong              | 2003-2013       | 1,660              | 0.0              | 0.0        | 0.1        | 1,659             | 0.1         | 0.0        | 1,657             | 17.7                           | 82.3                    | 0.4               | 0.0        |
| Sihui               | 2003-2013       | 93                 | 1.1              | 0.0        | 0.0        | 92                | 6.5         | 0.0        | 86                | 14.0                           | 93.0                    | 2.3               | 1.2        |
| Taixing             | 2003-2013       | 650                | 12.3             | 0.0        | 0.0        | 570               | 0.2         | 0.0        | 569               | 35.9                           | 92.8                    | 0.7               | 0.0        |
| Yangzhong           | 2003-2013       | 130                | 0.0              | 0.0        | 0.0        | 130               | 0.0         | 0.0        | 130               | 33.8                           | 100.0                   | 0.0               | 0.0        |
| Zhongshan           | 2003-2013       | 635                | 0.0              | 0.0        | 0.5        | 632               | 0.0         | 0.0        | 632               | 25.0                           | 79.9                    | 0.0               | 0.0        |
| Cyprus *            | 2004-2014       | 723                | 0.1              | 0.0        | 1.0        | 715               | 25.3        | 0.0        | 534               | 89.9                           | 14.2                    | 0.0               | 6.2        |
| Hong Kong *         | -               | -                  | -                | -          | -          | -                 | -           | -          | -                 | -                              | -                       | -                 | -          |
| Indian registries   | 2000-2014       | 138                | 0.0              | 0.0        | 0.0        | 138               | 1.4         | 1.4        | 134               | 44.0                           | 66.4                    | 0.7               | 0.0        |
| Guwahati            | -               | -                  | -                | -          | -          | -                 | -           | -          | -                 | -                              | -                       | -                 | -          |
| Karunagappally      | 2000-2014       | 138                | 0.0              | 0.0        | 0.0        | 138               | 1.4         | 1.4        | 134               | 44.0                           | 66.4                    | 0.7               | 0.0        |
| Iran (Golestan)     | -               | -                  | -                | -          | -          | -                 | -           | -          | -                 | -                              | -                       | -                 | -          |
| Israel *            | 2000-2013       | 10,711             | 0.0              | 0.3        | 2.5        | 10,414            | 22.1        | 0.3        | 8,083             | 73.9                           | 28.9                    | 0.0               | 0.0        |
| Japanese registries | 2000-2014       | 105,230            | 0.3              | 0.5        | 0.3        | 104,102           | 23.5        | 0.0        | 79,636            | 52.9                           | 46.1                    | 0.0               | 0.4        |
| Aichi               | 2003-2013       | 16,203             | 0.1              | 0.5        | 0.3        | 16,055            | 18.3        | 0.0        | 13,111            | 59.6                           | 44.5                    | 0.0               | 0.5        |
| Akita               | 2010-2014       | 1,832              | 1.7              | 1.1        | 0.2        | 1,777             | 0.0         | 1.0        | 1,759             | 47.2                           | 62.5                    | 0.0               | 7.0        |
| Ehime               | 2007-2013       | 3,004              | 0.0              | 1.1        | 0.3        | 2,962             | 23.7        | 0.0        | 2,260             | 46.2                           | 55.2                    | 0.0               | 0.0        |
| Fukui               | 2003-2009       | 1,471              | 0.2              | 0.7        | 0.1        | 1,455             | 4.9         | 0.0        | 1,383             | 37.2                           | 65.7                    | 0.0               | 0.5        |
| Gunma               | 2003-2012       | 4,256              | 2.8              | 0.2        | 0.2        | 4,117             | 34.0        | 0.0        | 2,716             | 46.8                           | 4.5                     | 0.0               | 0.3        |
| Hiroshima           | 2004-2008       | 3,313              | 0.3              | 1.1        | 0.8        | 3,240             | 16.9        | 0.0        | 2,691             | 95.4                           | 5.3                     | 0.0               | 0.1        |
| Hyogo               | 2007-2012       | 8,441              | 0.4              | 0.7        | 0.3        | 8,314             | 32.7        | 0.0        | 5,599             | 54.6                           | 51.5                    | 0.0               | 0.2        |
| Ibaraki             | 2006-2012       | 4,852              | 0.1              | 0.5        | 0.2        | 4,812             | 26.6        | 0.0        | 3,534             | 44.8                           | 63.8                    | 0.0               | 0.3        |
| Kanagawa            | 2000-2013       | 22,446             | 0.0              | 0.5        | 0.1        | 22,319            | 33.8        | 0.1        | 14,743            | 59.4                           | 55.1                    | 0.0               | 0.0        |
| Miyagi              | 2000-2010       | 5,672              | 0.5              | 0.8        | 0.2        | 5,584             | 19.7        | 0.0        | 4,482             | 44.8                           | 55.7                    | 0.0               | 0.4        |
| Niigata             | 2000-2013       | 8,923              | 0.1              | 0.3        | 0.5        | 8,842             | 18.5        | 0.0        | 7,199             | 38.1                           | 1.3                     | 0.0               | 0.0        |
| Osaka               | 2000-2008       | 14,583             | 0.0              | 0.2        | 0.3        | 14,511            | 19.3        | 0.0        | 11,705            | 51.7                           | 56.4                    | 0.0               | 0.5        |
| Saga                | 2006-2013       | 1,640              | 0.4              | 0.2        | 0.5        | 1,620             | 17.8        | 0.0        | 1,331             | 43.5                           | 61.5                    | 0.0               | 0.0        |
| Tochigi             | 2006-2013       | 3,731              | 0.2              | 0.5        | 0.3        | 3,694             | 21.9        | 0.0        | 2,885             | 55.1                           | 48.9                    | 0.0               | 0.1        |
| Yamagata            | 2003-2013       | 3,713              | 0.3              | 0.8        | 0.2        | 3,668             | 10.4        | 0.0        | 3,286             | 40.0                           | 63.7                    | 0.0               | 0.2        |
| Yamanashi           | 2008-2012       | 1,150              | 0.4              | 0.9        | 0.3        | 1,132             | 15.9        | 0.0        | 952               | 45.2                           | 57.5                    | 0.0               | 0.0        |
| Jordan *            | 2000-2014       | 992                | 0.1              | 0.2        | 0.9        | 980               | 1.1         | 1.7        | 952               | 87.8                           | 19.1                    | 2.6               | 0.0        |
| Korea * ‡           | 2000-2014       | 59,775             | 0.4              | 0.0        | 0.0        | 59,513            | 0.0         | 0.3        | 59,357            | 56.1                           | 46.0                    | 0.0               | 0.0        |
| Kuwait *            | 2000-2013       | 265                | 0.0              | 0.0        | 0.4        | 264               | 8.3         | 0.8        | 240               | 100.0                          | 0.4                     | 0.8               | 0.0        |
| Malaysia (Penang)   | 2000-2013       | 562                | 0.9              | 0.0        | 0.0        | 557               | 1.8         | 1.4        | 539               | 73.1                           | 33.4                    | 0.0               | 2.6        |
| Mongolia *          | -               | -                  | -                | -          | -          | -                 | -           | -          | -                 | -                              | -                       | -                 | -          |
| Qatar *             | 2000-2014       | 193                | 0.0              | 0.0        | 0.5        | 192               | 2.6         | 0.5        | 186               | 82.3                           | 21.0                    | 0.0               | 38.2       |
| Singapore *         | 2000-2014       | 3,710              | 0.0              | 0.6        | 1.5        | 3,630             | 3.8         | 0.3        | 3,481             | 73.2                           | 7.0                     | 0.0               | 0.0        |
| Taiwan *            | 2000-2014       | 22,454             | 0.0              | 0.2        | 0.1        | 22,385            | 0.0         | 0.5        | 22,283            | 67.5                           | 0.8                     | 0.0               | 0.0        |

Web-table 2.6: Data quality indicators, patients diagnosed during 2000-2014, by continent, country and registry: PANCREAS

|                                | Calendar period | Patients submitted | Ineligible (%) ¶ |            |            | Excluded (%) ¶¶   |            |            | Patients included | Data quality indicators (%) †† |                         |                   |            |
|--------------------------------|-----------------|--------------------|------------------|------------|------------|-------------------|------------|------------|-------------------|--------------------------------|-------------------------|-------------------|------------|
|                                |                 |                    | Incomplete dates | In situ    | Other      | Eligible patients | DCO        | Other      |                   | MV                             | Non-specific morphology | Lost to follow-up | Censored   |
| Thai registries                | 2000-2014       | 3,715              | 0.0              | 0.0        | 0.6        | 3,690             | 5.5        | 5.5        | 3,284             | 45.7                           | 54.6                    | 0.0               | 2.1        |
| Bangkok                        | 2001-2012       | 2,207              | 0.0              | 0.0        | 1.0        | 2,185             | 6.5        | 9.0        | 1,846             | 54.8                           | 45.3                    | 0.0               | 0.0        |
| Khon Kaen                      | 2000-2014       | 300                | 0.0              | 0.0        | 0.0        | 300               | 1.7        | 1.3        | 291               | 26.8                           | 73.2                    | 0.0               | 3.4        |
| Lampang                        | 2000-2014       | 394                | 0.0              | 0.0        | 0.0        | 394               | 1.5        | 0.3        | 387               | 39.0                           | 61.0                    | 0.0               | 5.4        |
| Lamphun                        | 2000-2014       | 185                | 0.0              | 0.0        | 0.0        | 185               | 2.2        | 1.1        | 179               | 27.4                           | 72.6                    | 0.0               | 0.0        |
| Lopburi                        | 2000-2014       | 270                | 0.0              | 0.0        | 0.0        | 270               | 10.4       | 0.0        | 242               | 23.1                           | 76.9                    | 0.0               | 14.5       |
| Songkhla                       | 2000-2014       | 359                | 0.0              | 0.0        | 0.8        | 356               | 4.5        | 0.3        | 339               | 45.7                           | 56.9                    | 0.0               | 1.2        |
| Turkish registries             | 2000-2013       | 8,023              | 1.5              | 0.2        | 0.4        | 7,854             | 3.6        | 0.6        | 7,526             | 78.1                           | 27.8                    | 0.0               | 3.9        |
| Ankara                         | 2008-2012       | 2,267              | 0.0              | 0.3        | 0.9        | 2,239             | 2.6        | 0.9        | 2,159             | 96.1                           | 9.6                     | 0.0               | 1.2        |
| Antalya                        | 2006-2012       | 648                | 0.2              | 0.0        | 0.0        | 647               | 1.5        | 0.9        | 631               | 76.5                           | 28.2                    | 0.0               | 1.0        |
| Bursa                          | 2006-2012       | 927                | 7.7              | 0.0        | 0.2        | 854               | 5.2        | 0.5        | 806               | 72.2                           | 34.6                    | 0.0               | 0.0        |
| Edirne                         | 2006-2012       | 192                | 5.2              | 0.0        | 0.0        | 182               | 19.2       | 0.0        | 147               | 59.9                           | 46.9                    | 0.0               | 0.0        |
| Erzurum                        | 2006-2012       | 182                | 0.0              | 0.0        | 0.0        | 182               | 2.2        | 1.1        | 176               | 47.7                           | 60.2                    | 0.0               | 3.4        |
| Eskisehir                      | 2006-2012       | 352                | 0.0              | 0.0        | 0.0        | 352               | 5.1        | 0.0        | 334               | 75.4                           | 0.0                     | 0.0               | 0.6        |
| Izmir                          | 2000-2013       | 2,739              | 1.5              | 0.2        | 0.3        | 2,684             | 2.6        | 0.4        | 2,603             | 72.9                           | 35.8                    | 0.0               | 9.4        |
| Samsun                         | 2006-2012       | 427                | 0.0              | 0.0        | 0.0        | 427               | 7.0        | 0.5        | 395               | 66.3                           | 41.5                    | 0.5               | 0.0        |
| Trabzon                        | 2006-2012       | 289                | 0.0              | 0.3        | 0.3        | 287               | 4.2        | 0.0        | 275               | 57.5                           | 56.7                    | 0.0               | 2.5        |
| <b>EUROPE</b>                  |                 | <b>561,453</b>     | <b>0.2</b>       | <b>0.2</b> | <b>1.9</b> | <b>548,896</b>    | <b>7.4</b> | <b>0.3</b> | <b>506,723</b>    | <b>72.2</b>                    | <b>16.6</b>             | <b>0.2</b>        | <b>0.6</b> |
| Austria *                      | 2000-2014       | 22,300             | 0.0              | 0.2        | 0.3        | 22,189            | 15.5       | 1.7        | 18,371            | 90.2                           | 16.8                    | 0.0               | 0.0        |
| Belarus (Childhood) †          | -               | -                  | -                | -          | -          | -                 | -          | -          | -                 | -                              | -                       | -                 | -          |
| Belgium *                      | 2004-2014       | 15,198             | 0.0              | 0.9        | 0.0        | 15,062            | 0.1        | 0.3        | 15,015            | 88.6                           | 13.6                    | 0.8               | 0.0        |
| Bulgaria *                     | -               | -                  | -                | -          | -          | -                 | -          | -          | -                 | -                              | -                       | -                 | -          |
| Croatia *                      | 2000-2014       | 9,904              | 0.0              | 0.0        | 0.0        | 9,900             | 13.0       | 0.2        | 8,596             | 55.9                           | 0.4                     | 0.0               | 0.0        |
| Czech Republic *               | 2000-2014       | 28,868             | 0.0              | 0.1        | 0.4        | 28,720            | 3.7        | 0.1        | 27,622            | 53.1                           | 2.4                     | 0.0               | 0.0        |
| Denmark *                      | 2000-2014       | 13,295             | 0.0              | 0.0        | 0.1        | 13,279            | 0.0        | 0.0        | 13,279            | 82.6                           | 30.9                    | 0.0               | 0.0        |
| Estonia *                      | 2000-2012       | 2,922              | 0.0              | 0.1        | 0.2        | 2,915             | 7.4        | 0.0        | 2,698             | 50.8                           | 3.4                     | 0.1               | 0.0        |
| Finland *                      | 2000-2014       | 14,755             | 0.8              | 0.0        | 0.3        | 14,596            | 11.8       | 0.1        | 12,851            | 67.8                           | 13.4                    | 0.0               | 0.0        |
| French registries              | 2000-2010       | 15,449             | 0.1              | 0.0        | 0.1        | 15,422            | 0.0        | 0.6        | 15,328            | 69.3                           | 1.5                     | 0.8               | 0.0        |
| Bas-Rhin                       | 2000-2010       | 1,558              | 0.0              | 0.0        | 0.0        | 1,558             | 0.0        | 0.5        | 1,550             | 72.8                           | 0.6                     | 0.6               | 0.0        |
| Basse Normandie                | -               | -                  | -                | -          | -          | -                 | -          | -          | -                 | -                              | -                       | -                 | -          |
| Burgundy Digestive             | 2000-2010       | 1,860              | 0.0              | 0.0        | 0.1        | 1,858             | 0.0        | 0.4        | 1,851             | 60.3                           | 1.1                     | 0.2               | 0.0        |
| Calvados                       | -               | -                  | -                | -          | -          | -                 | -          | -          | -                 | -                              | -                       | -                 | -          |
| Calvados Digestive             | 2000-2010       | 1,073              | 0.1              | 0.0        | 0.0        | 1,072             | 0.0        | 0.4        | 1,068             | 56.1                           | 6.3                     | 0.1               | 0.0        |
| Côte-d'Or Gynaecologic         | -               | -                  | -                | -          | -          | -                 | -          | -          | -                 | -                              | -                       | -                 | -          |
| Côte-d'Or Haematopoietic       | -               | -                  | -                | -          | -          | -                 | -          | -          | -                 | -                              | -                       | -                 | -          |
| Doubs                          | 2000-2010       | 703                | 0.0              | 0.0        | 0.0        | 703               | 0.0        | 0.1        | 702               | 72.2                           | 0.7                     | 0.4               | 0.0        |
| Finistère                      | 2005-2010       | 717                | 0.0              | 0.0        | 0.0        | 717               | 0.0        | 0.3        | 715               | 67.3                           | 1.1                     | 0.4               | 0.0        |
| Gironde CNS                    | -               | -                  | -                | -          | -          | -                 | -          | -          | -                 | -                              | -                       | -                 | -          |
| Gironde General                | 2005-2010       | 777                | 0.9              | 0.0        | 0.4        | 767               | 0.0        | 0.1        | 766               | 76.2                           | 0.7                     | 1.8               | 0.0        |
| Gironde Haematopoietic         | -               | -                  | -                | -          | -          | -                 | -          | -          | -                 | -                              | -                       | -                 | -          |
| Haut-Rhin                      | 2000-2010       | 914                | 0.0              | 0.0        | 0.0        | 914               | 0.0        | 0.7        | 908               | 80.9                           | 1.3                     | 1.0               | 0.0        |
| Haute-Vienne                   | 2009-2009       | 65                 | 0.0              | 0.0        | 0.0        | 65                | 0.0        | 0.0        | 65                | 80.0                           | 0.0                     | 3.1               | 0.0        |
| Hérault                        | 2000-2010       | 1,655              | 0.0              | 0.0        | 0.1        | 1,654             | 0.0        | 1.1        | 1,636             | 70.0                           | 0.1                     | 0.6               | 0.0        |
| Isère                          | 2000-2010       | 1,661              | 0.0              | 0.0        | 0.0        | 1,661             | 0.0        | 0.6        | 1,651             | 75.5                           | 0.8                     | 0.2               | 0.0        |
| Lille Metro                    | 2008-2010       | 281                | 0.0              | 0.0        | 0.7        | 279               | 0.0        | 0.7        | 277               | 52.0                           | 1.8                     | 0.0               | 0.0        |
| Loire-Atlantique               | 2000-2010       | 2,082              | 0.5              | 0.0        | 0.0        | 2,072             | 0.0        | 1.5        | 2,041             | 74.7                           | 1.7                     | 2.1               | 0.0        |
| Manche                         | 2000-2010       | 669                | 0.0              | 0.0        | 0.0        | 669               | 0.0        | 0.1        | 668               | 58.7                           | 1.8                     | 0.4               | 0.0        |
| Somme                          | 2000-2010       | 745                | 0.0              | 0.0        | 0.0        | 745               | 0.0        | 0.4        | 742               | 74.7                           | 2.7                     | 1.2               | 0.0        |
| Tarn                           | 2000-2010       | 689                | 0.0              | 0.0        | 0.1        | 688               | 0.0        | 0.0        | 688               | 59.3                           | 2.0                     | 0.7               | 0.0        |
| France Childhood Haem †        | -               | -                  | -                | -          | -          | -                 | -          | -          | -                 | -                              | -                       | -                 | -          |
| France Childhood Solid †       | -               | -                  | -                | -          | -          | -                 | -          | -          | -                 | -                              | -                       | -                 | -          |
| German registries              | 2000-2014       | 76,672             | 0.9              | 0.2        | 0.8        | 75,303            | 23.6       | 0.1        | 57,498            | 84.7                           | 3.0                     | 0.1               | 4.6        |
| Brandenburg                    | 2000-2014       | 7,641              | 0.0              | 0.4        | 0.5        | 7,575             | 22.3       | 0.1        | 5,875             | 81.4                           | 2.1                     | 0.0               | 5.4        |
| Bremen                         | 2000-2013       | 1,940              | 0.0              | 0.2        | 1.6        | 1,905             | 15.0       | 0.0        | 1,620             | 76.0                           | 0.3                     | 0.7               | 0.0        |
| Hamburg                        | 2000-2013       | 4,667              | 0.0              | 0.0        | 0.0        | 4,666             | 19.0       | 0.2        | 3,773             | 97.8                           | 2.3                     | 0.7               | 0.0        |
| Lower Saxony                   | 2003-2013       | 16,651             | 3.9              | 0.0        | 0.3        | 15,949            | 22.9       | 0.1        | 12,275            | 98.7                           | 1.6                     | 0.0               | 6.0        |
| Mecklenburg-W. Pomerania       | 2000-2014       | 5,050              | 0.0              | 0.4        | 0.8        | 4,989             | 17.5       | 0.1        | 4,111             | 75.9                           | 1.3                     | 0.0               | 6.0        |
| Rhineland Palatinate           | 2000-2013       | 9,759              | 0.0              | 0.1        | 1.1        | 9,636             | 32.8       | 0.1        | 6,463             | 74.2                           | 0.3                     | 0.0               | 7.5        |
| Saarland                       | 2000-2012       | 2,415              | 0.0              | 0.0        | 0.1        | 2,413             | 21.9       | 0.1        | 1,882             | 89.0                           | 13.0                    | 0.0               | 0.0        |
| Saxony                         | 2000-2014       | 13,994             | 0.0              | 0.2        | 1.0        | 13,821            | 16.0       | 0.1        | 11,592            | 75.2                           | 3.5                     | 0.0               | 4.2        |
| Schleswig-Holstein             | 2000-2012       | 7,330              | 0.0              | 0.2        | 1.5        | 7,206             | 36.6       | 0.1        | 4,564             | 89.1                           | 11.5                    | 0.0               | 0.0        |
| Thuringia                      | 2000-2014       | 7,225              | 0.0              | 0.3        | 0.8        | 7,143             | 25.1       | 0.1        | 5,343             | 84.0                           | 1.1                     | 0.0               | 7.3        |
| Gibraltar *                    | 2001-2009       | 24                 | 41.7             | 0.0        | 0.0        | 14                | 0.0        | 7.1        | 13                | 100.0                          | 0.0                     | 0.0               | 15.4       |
| Greece (National Paediatric) † | -               | -                  | -                | -          | -          | -                 | -          | -          | -                 | -                              | -                       | -                 | -          |
| Iceland *                      | 2000-2014       | 488                | 0.0              | 0.0        | 0.4        | 486               | 0.8        | 0.2        | 481               | 76.1                           | 24.9                    | 0.0               | 0.0        |
| Ireland *                      | 2000-2013       | 6,299              | 0.0              | 0.7        | 1.0        | 6,190             | 4.1        | 0.1        | 5,931             | 61.1                           | 3.6                     | 0.0               | 0.0        |
| Italian registries             | 2000-2014       | 57,750             | 0.0              | 0.1        | 0.2        | 57,587            | 1.4        | 0.1        | 56,698            | 47.2                           | 55.5                    | 0.3               | 0.4        |
| Alto Adige                     | 2000-2010       | 935                | 0.0              | 0.0        | 0.0        | 935               | 3.1        | 0.5        | 901               | 52.4                           | 47.9                    | 0.0               | 0.0        |
| Barletta-Andria-Trani          | 2006-2012       | 298                | 0.0              | 0.0        | 0.3        | 297               | 3.0        | 0.0        | 288               | 46.9                           | 54.5                    | 1.4               | 0.0        |
| Basilicata                     | 2006-2010       | 405                | 0.0              | 0.0        | 0.0        | 405               | 0.0        | 0.0        | 405               | 45.4                           | 56.8                    | 0.2               | 0.7        |
| Bergamo                        | 2007-2012       | 1,529              | 0.0              | 0.0        | 0.2        | 1,526             | 0.1        | 0.1        | 1,524             | 54.9                           | 50.6                    | 0.1               | 0.0        |
| Biella-Vercelli                | 2000-2010       | 624                | 0.0              | 0.0        | 1.3        | 616               | 1.9        | 0.5        | 601               | 44.1                           | 56.4                    | 0.2               | 1.8        |
| Brescia                        | 2000-2008       | 1,913              | 0.0              | 0.0        | 0.1        | 1,911             | 0.0        | 0.1        | 1,910             | 40.2                           | 65.7                    | 0.1               | 0.1        |
| Brindisi                       | 2006-2008       | 144                | 0.0              | 0.0        | 0.0        | 144               | 0.0        | 0.0        | 144               | 52.1                           | 52.1                    | 0.0               | 0.0        |
| Caserta                        | 2008-2010       | 269                | 0.0              | 0.0        | 0.0        | 269               | 0.0        | 0.7        | 267               | 54.7                           | 46.4                    | 0.0               | 3.4        |
| Catania-Messina-Enna           | 2003-2012       | 2,697              | 0.0              | 0.0        | 0.0        | 2,696             | 3.0        | 0.1        | 2,611             | 45.2                           | 61.4                    | 0.0               | 1.4        |
| Catanzaro                      | 2003-2009       | 194                | 0.0              | 0.0        | 0.0        | 194               | 0.0        | 0.5        | 193               | 43.5                           | 60.1                    | 1.0               | 0.5        |
| Como                           | 2003-2011       | 995                | 0.0              | 0.0        | 0.0        | 995               | 0.1        | 0.1        | 993               | 42.6                           | 58.5                    | 0.3               | 0.0        |
| Cremona                        | 2005-2010       | 560                | 0.0              | 0.0        | 0.2        | 559               | 2.5        | 0.2        | 544               | 44.7                           | 57.5                    | 0.7               | 0.0        |
| Ferrara                        | 2000-2011       | 1,061              | 0.0              | 0.0        | 0.1        | 1,060             | 0.7        | 0.2        | 1,051             | 42.0                           | 59.0                    | 0.2               | 0.0        |
| Friuli-Venezia-Giulia          | 2000-2010       | 3,142              | 0.0              | 0.0        | 0.1        | 3,139             | 5.2        | 0.0        | 2,975             | 42.5                           | 58.3                    | 0.0               | 0.0        |
| Genoa                          | 2000-2009       | 1,972              | 0.0              | 0.1        | 1.3        | 1,945             | 0.2        | 0.1        | 1,940             | 45.4                           | 55.9                    | 0.1               | 0.0        |
| Latina                         | 2000-2011       | 732                | 0.0              | 0.0        | 0.0        | 732               | 0.0        | 0.7        | 727               | 43.7                           | 58.5                    | 1.4               | 0.8        |
| Lecce                          | 2003-2008       | 638                | 0.0              | 0.0        | 0.0        | 638               | 0.0        | 0.0        | 638               | 37.5                           | 64.1                    | 0.0               | 0.9        |

Web-table 2.6: Data quality indicators, patients diagnosed during 2000-2014, by continent, country and registry: PANCREAS

|                      | Calendar period | Patients submitted | Ineligible (%) ¶ |         |       | Excluded (%) ¶¶   |      |       | Patients included | Data quality indicators (%) †† |                         |                   |          |
|----------------------|-----------------|--------------------|------------------|---------|-------|-------------------|------|-------|-------------------|--------------------------------|-------------------------|-------------------|----------|
|                      |                 |                    | Incomplete dates | In situ | Other | Eligible patients | DCO  | Other |                   | MV                             | Non-specific morphology | Lost to follow-up | Censored |
| Mantova              | 2000-2010       | 1,015              | 0.0              | 0.0     | 0.0   | 1,015             | 3.5  | 0.3   | 976               | 52.8                           | 51.8                    | 0.0               | 0.0      |
| Milano               | 2000-2012       | 4,860              | 0.0              | 0.0     | 0.1   | 4,854             | 0.2  | 0.1   | 4,839             | 51.9                           | 50.4                    | 0.7               | 1.1      |
| Modena               | 2000-2012       | 1,764              | 0.0              | 0.7     | 0.7   | 1,740             | 0.0  | 0.2   | 1,737             | 50.4                           | 50.6                    | 0.0               | 0.7      |
| Monza-Brianza        | 2007-2012       | 1,030              | 0.0              | 0.0     | 0.0   | 1,030             | 0.0  | 0.0   | 1,030             | 53.3                           | 49.9                    | 0.3               | 0.0      |
| Naples               | 2000-2012       | 986                | 0.0              | 0.0     | 0.1   | 985               | 0.0  | 0.5   | 980               | 55.3                           | 46.7                    | 0.6               | 0.2      |
| Nuoro                | 2003-2012       | 418                | 0.0              | 0.0     | 0.2   | 417               | 4.1  | 0.5   | 398               | 38.4                           | 63.3                    | 0.0               | 0.0      |
| Palermo              | 2003-2012       | 1,733              | 0.0              | 0.0     | 0.1   | 1,732             | 4.7  | 0.2   | 1,646             | 43.3                           | 59.2                    | 0.2               | 0.0      |
| Parma                | 2000-2014       | 1,749              | 0.0              | 0.2     | 0.3   | 1,740             | 0.4  | 0.1   | 1,731             | 57.9                           | 50.5                    | 0.5               | 0.0      |
| Pavia                | 2003-2009       | 781                | 0.0              | 0.0     | 0.0   | 781               | 0.0  | 0.0   | 781               | 47.0                           | 55.7                    | 0.1               | 0.4      |
| Piacenza             | 2006-2011       | 455                | 0.0              | 0.0     | 0.2   | 454               | 0.0  | 0.0   | 454               | 46.5                           | 56.2                    | 0.2               | 1.1      |
| Ragusa               | 2000-2012       | 850                | 0.0              | 0.0     | 0.9   | 842               | 4.8  | 0.1   | 801               | 35.6                           | 69.4                    | 0.0               | 0.0      |
| Reggio Emilia        | 2000-2012       | 1,379              | 0.0              | 0.0     | 0.0   | 1,379             | 0.0  | 0.1   | 1,378             | 51.6                           | 52.1                    | 0.4               | 0.0      |
| Romagna              | 2000-2012       | 3,380              | 0.0              | 0.5     | 0.1   | 3,358             | 0.1  | 0.0   | 3,354             | 44.3                           | 56.8                    | 0.0               | 0.0      |
| Salerno              | 2000-2009       | 1,043              | 0.0              | 0.0     | 0.1   | 1,042             | 0.0  | 0.6   | 1,036             | 40.7                           | 60.8                    | 0.8               | 1.8      |
| Sassari              | 2000-2011       | 964                | 0.0              | 0.0     | 0.0   | 964               | 4.5  | 0.2   | 919               | 55.4                           | 50.3                    | 0.1               | 0.0      |
| Siracusa             | 2000-2012       | 727                | 0.0              | 0.0     | 0.0   | 727               | 5.1  | 0.1   | 689               | 38.2                           | 65.2                    | 0.0               | 0.3      |
| Sondrio              | 2000-2011       | 518                | 0.0              | 0.0     | 0.0   | 518               | 0.0  | 0.0   | 518               | 48.1                           | 58.3                    | 0.4               | 0.0      |
| Taranto              | 2006-2012       | 545                | 0.0              | 0.0     | 0.2   | 544               | 2.9  | 0.0   | 528               | 53.4                           | 49.1                    | 0.4               | 0.0      |
| Trapani              | 2002-2010       | 511                | 0.0              | 0.0     | 0.2   | 510               | 1.2  | 0.0   | 504               | 30.8                           | 73.4                    | 0.8               | 0.2      |
| Trento               | 2000-2010       | 1,042              | 0.0              | 0.0     | 0.0   | 1,042             | 1.7  | 0.4   | 1,020             | 46.0                           | 58.9                    | 0.3               | 0.0      |
| Turin                | 2000-2012       | 2,216              | 0.0              | 0.0     | 0.4   | 2,208             | 3.1  | 0.0   | 2,139             | 55.1                           | 47.8                    | 0.4               | 0.0      |
| Tuscany              | 2000-2009       | 2,227              | 0.0              | 0.3     | 0.9   | 2,201             | 1.5  | 0.2   | 2,164             | 40.9                           | 61.1                    | 0.0               | 0.5      |
| Umbria               | 2000-2013       | 2,402              | 0.0              | 0.0     | 0.0   | 2,401             | 0.2  | 0.1   | 2,392             | 48.7                           | 52.8                    | 0.1               | 0.3      |
| Varese               | 2000-2012       | 1,923              | 0.0              | 0.0     | 0.2   | 1,920             | 0.6  | 0.2   | 1,906             | 56.0                           | 44.4                    | 0.3               | 0.1      |
| Veneto               | 2000-2009       | 4,817              | 0.0              | 0.0     | 0.0   | 4,815             | 0.9  | 0.1   | 4,771             | 44.3                           | 57.9                    | 0.2               | 0.1      |
| Viterbo              | 2006-2010       | 307                | 0.0              | 0.0     | 0.0   | 307               | 3.9  | 0.0   | 295               | 45.8                           | 55.6                    | 0.0               | 3.1      |
| Piedmont Childhood   | -               | -                  | -                | -       | -     | -                 | -    | -     | -                 | -                              | -                       | -                 | -        |
| Latvia *             | 2000-2014       | 5,492              | 0.0              | 0.0     | 80.2  | 1,087             | 0.0  | 1.4   | 1,072             | 100.0                          | 2.9                     | 0.0               | 0.0      |
| Lithuania *          | 2000-2012       | 6,149              | 0.0              | 0.0     | 0.2   | 6,135             | 11.5 | 0.1   | 5,421             | 60.2                           | 0.6                     | 0.0               | 0.1      |
| Malta *              | 2000-2013       | 799                | 0.0              | 0.0     | 0.0   | 799               | 10.8 | 0.5   | 709               | 49.4                           | 55.0                    | 0.0               | 0.0      |
| Netherlands *        | 2000-2014       | 29,066             | 0.0              | 0.4     | 0.0   | 28,954            | 0.6  | 0.2   | 28,717            | 66.2                           | 34.4                    | 0.1               | 0.0      |
| Norway *             | 2000-2014       | 10,725             | 0.0              | 0.4     | 36.8  | 6,732             | 0.8  | 0.1   | 6,671             | 99.9                           | 0.9                     | 0.0               | 0.0      |
| Poland *             | 2000-2014       | 51,305             | 0.0              | 0.0     | 0.0   | 51,299            | 6.8  | 0.4   | 47,635            | 73.8                           | 1.3                     | 0.0               | 0.0      |
| Greater Poland       | 2000-2014       | 4,833              | 0.0              | 0.0     | 0.0   | 4,833             | 13.2 | 0.2   | 4,183             | 81.9                           | 0.4                     | 0.0               | 0.0      |
| Holy Cross           | 2000-2014       | 2,088              | 0.0              | 0.0     | 0.0   | 2,088             | 6.2  | 0.1   | 1,957             | 82.1                           | 2.8                     | 0.0               | 0.0      |
| Kujavia-Pomerania    | 2000-2014       | 2,315              | 0.0              | 0.0     | 0.0   | 2,315             | 2.3  | 0.7   | 2,246             | 93.1                           | 0.6                     | 0.0               | 0.0      |
| Lesser Poland        | 2000-2014       | 4,784              | 0.0              | 0.0     | 0.0   | 4,783             | 8.2  | 0.1   | 4,385             | 78.5                           | 4.6                     | 0.0               | 0.0      |
| Łódź                 | 2000-2014       | 3,569              | 0.0              | 0.0     | 0.0   | 3,569             | 1.6  | 1.5   | 3,459             | 66.0                           | 0.3                     | 0.0               | 0.0      |
| Lower Silesia        | 2000-2014       | 4,490              | 0.0              | 0.1     | 0.0   | 4,486             | 1.4  | 0.4   | 4,407             | 47.4                           | 2.9                     | 0.1               | 0.0      |
| Lublin               | 2000-2014       | 3,026              | 0.0              | 0.0     | 0.0   | 3,026             | 13.0 | 0.4   | 2,622             | 62.8                           | 0.5                     | 0.0               | 0.0      |
| Lubush               | 2000-2014       | 1,194              | 0.0              | 0.0     | 0.0   | 1,194             | 6.4  | 0.3   | 1,114             | 78.5                           | 1.2                     | 0.0               | 0.0      |
| Mazovia              | 2000-2014       | 5,569              | 0.0              | 0.0     | 0.0   | 5,569             | 0.0  | 0.3   | 5,552             | 75.9                           | 0.6                     | 0.0               | 0.0      |
| Opole                | 2000-2014       | 1,254              | 0.0              | 0.0     | 0.0   | 1,254             | 0.1  | 0.3   | 1,249             | 83.7                           | 0.4                     | 0.0               | 0.0      |
| Podlaha              | 2000-2014       | 1,452              | 0.0              | 0.0     | 0.0   | 1,452             | 14.7 | 0.3   | 1,234             | 56.0                           | 1.4                     | 0.0               | 0.0      |
| Pomerania            | 2000-2014       | 3,252              | 0.0              | 0.0     | 0.0   | 3,252             | 21.6 | 0.1   | 2,546             | 89.4                           | 0.2                     | 0.0               | 0.0      |
| Silesia              | 2000-2014       | 6,815              | 0.0              | 0.0     | 0.0   | 6,815             | 2.8  | 0.3   | 6,604             | 69.4                           | 1.1                     | 0.0               | 0.0      |
| Subcarpathia         | 2000-2014       | 3,169              | 0.0              | 0.0     | 0.0   | 3,168             | 6.9  | 0.4   | 2,937             | 88.1                           | 0.4                     | 0.0               | 0.0      |
| Varmia-Mazuria       | 2000-2014       | 1,408              | 0.0              | 0.0     | 0.0   | 1,408             | 1.4  | 0.4   | 1,383             | 84.1                           | 2.2                     | 0.0               | 0.0      |
| West Pomerania       | 2000-2014       | 2,087              | 0.0              | 0.0     | 0.0   | 2,087             | 15.4 | 0.4   | 1,757             | 63.9                           | 0.0                     | 0.0               | 0.0      |
| Portugal *           | 2000-2014       | 8,540              | 0.4              | 0.3     | 1.4   | 8,354             | 0.2  | 0.4   | 8,303             | 72.0                           | 14.9                    | 1.1               | 0.0      |
| Azores               | 2000-2014       | 372                | 0.0              | 0.0     | 0.0   | 372               | 5.4  | 0.5   | 350               | 39.4                           | 61.7                    | 0.0               | 0.6      |
| Portugal Central     | 2007-2010       | 478                | 0.0              | 0.0     | 0.0   | 478               | 0.0  | 0.0   | 478               | 73.4                           | 28.2                    | 0.2               | 0.0      |
| Portugal North       | 2000-2010       | 1,808              | 1.7              | 0.0     | 0.2   | 1,773             | 0.0  | 0.5   | 1,765             | 80.6                           | 26.5                    | 0.0               | 0.0      |
| Portugal South       | 2000-2014       | 5,882              | 0.1              | 0.5     | 2.0   | 5,731             | 0.0  | 0.4   | 5,710             | 71.3                           | 7.4                     | 1.5               | 0.0      |
| Romania (Cluj)       | 2006-2012       | 919                | 0.0              | 0.0     | 0.8   | 912               | 38.0 | 0.2   | 563               | 61.8                           | 39.4                    | 0.0               | 0.0      |
| Russian registries ‡ | 2000-2014       | 10,342             | 0.0              | 0.0     | 0.3   | 10,313            | 1.9  | 0.7   | 10,048            | 53.3                           | 5.7                     | 1.2               | 0.3      |
| Arkhangelsk          | 2000-2014       | 2,131              | 0.0              | 0.1     | 0.0   | 2,128             | 2.9  | 1.1   | 2,044             | 62.8                           | 7.0                     | 0.5               | 0.0      |
| Karelia              | 2000-2014       | 1,127              | 0.0              | 0.0     | 2.0   | 1,104             | 3.6  | 0.5   | 1,059             | 37.6                           | 4.0                     | 0.6               | 0.6      |
| Omsk                 | 2000-2014       | 1,295              | 0.0              | 0.0     | 0.1   | 1,294             | 0.0  | 0.5   | 1,287             | 95.3                           | 14.7                    | 2.2               | 1.6      |
| Samara               | 2000-2014       | 4,867              | 0.0              | 0.0     | 0.0   | 4,865             | 1.9  | 0.4   | 4,756             | 41.0                           | 4.1                     | 1.3               | 0.0      |
| Tomsk                | 2005-2014       | 922                | 0.0              | 0.0     | 0.0   | 922               | 0.0  | 2.2   | 902               | 55.2                           | 0.0                     | 1.1               | 0.2      |
| Slovakia *           | 2000-2010       | 7,989              | 0.0              | 0.1     | 0.6   | 7,940             | 16.6 | 0.0   | 6,624             | 69.3                           | 31.5                    | 0.0               | 0.0      |
| Slovenia *           | 2000-2013       | 4,254              | 0.0              | 0.0     | 0.3   | 4,242             | 4.0  | 0.0   | 4,073             | 53.8                           | 0.3                     | 0.0               | 0.0      |
| Spanish registries   | 2000-2013       | 13,184             | 0.0              | 0.1     | 0.5   | 13,102            | 4.9  | 0.2   | 12,438            | 62.1                           | 9.8                     | 0.3               | 0.0      |
| Basque Country       | 2000-2013       | 4,529              | 0.0              | 0.0     | 0.2   | 4,522             | 3.1  | 0.3   | 4,368             | 62.4                           | 1.3                     | 0.1               | 0.0      |
| Canaries             | 2000-2011       | 1,914              | 0.0              | 0.3     | 0.5   | 1,898             | 5.3  | 0.1   | 1,795             | 60.2                           | 4.3                     | 0.5               | 0.0      |
| Girona               | 2000-2013       | 1,172              | 0.1              | 0.1     | 2.7   | 1,138             | 8.2  | 0.0   | 1,045             | 56.5                           | 46.7                    | 1.2               | 0.0      |
| Granada              | 2000-2012       | 1,042              | 0.0              | 0.0     | 0.3   | 1,039             | 3.8  | 0.2   | 998               | 53.7                           | 0.8                     | 0.4               | 0.0      |
| Mallorca             | 2000-2012       | 1,063              | 0.3              | 0.3     | 0.4   | 1,053             | 8.3  | 0.1   | 965               | 73.4                           | 4.8                     | 0.8               | 0.0      |
| Murcia               | 2000-2010       | 1,392              | 0.0              | 0.0     | 0.0   | 1,392             | 5.5  | 0.4   | 1,310             | 64.4                           | 37.9                    | 0.0               | 0.0      |
| Navarra              | 2000-2010       | 974                | 0.0              | 0.0     | 0.2   | 972               | 3.8  | 0.0   | 935               | 67.4                           | 3.0                     | 0.0               | 0.0      |
| Tarragona            | 2000-2011       | 1,098              | 0.2              | 0.4     | 0.4   | 1,088             | 6.0  | 0.1   | 1,022             | 59.3                           | 2.3                     | 0.0               | 0.0      |
| Spain Childhood      | -               | -                  | -                | -       | -     | -                 | -    | -     | -                 | -                              | -                       | -                 | -        |
| Valencia Childhood   | -               | -                  | -                | -       | -     | -                 | -    | -     | -                 | -                              | -                       | -                 | -        |
| Sweden *             | 2000-2014       | 15,648             | 0.0              | 0.7     | 3.6   | 14,983            | 4.8  | 0.2   | 14,240            | 87.7                           | 14.0                    | 0.0               | 0.0      |
| Swiss registries     | 2000-2014       | 8,234              | 0.0              | 0.1     | 1.1   | 8,129             | 4.2  | 1.2   | 7,694             | 77.1                           | 14.1                    | 0.9               | 0.9      |
| Basel                | 2000-2011       | 386                | 0.0              | 0.0     | 5.2   | 366               | 3.0  | 20.8  | 279               | 100.0                          | 0.0                     | 0.4               | 3.6      |
| Fribourg             | 2006-2014       | 332                | 0.0              | 0.3     | 3.0   | 321               | 0.0  | 4.0   | 308               | 77.9                           | 22.4                    | 1.0               | 0.0      |
| Geneva               | 2000-2013       | 971                | 0.0              | 0.7     | 2.6   | 939               | 3.7  | 0.1   | 903               | 74.3                           | 27.0                    | 1.1               | 0.0      |
| Graubünden-Glarus    | 2000-2014       | 557                | 0.0              | 0.0     | 0.2   | 556               | 0.9  | 0.0   | 551               | 73.3                           | 0.2                     | 5.4               | 0.0      |
| Neuchâtel            | 2000-2014       | 450                | 0.0              | 0.0     | 4.2   | 431               | 2.6  | 0.2   | 419               | 68.0                           | 6.4                     | 1.0               | 0.0      |
| St Gallen-Appenzell  | 2000-2014       | 1,195              | 0.0              | 0.0     | 0.5   | 1,189             | 0.9  | 0.2   | 1,176             | 79.5                           | 0.0                     | 0.6               | 0.0      |
| Ticino               | 2000-2014       | 952                | 0.0              | 0.0     | 0.0   | 952               | 7.4  | 0.0   | 882               | 76.8                           | 24.8                    | 0.7               | 0.0      |
| Valais               | 2000-2014       | 673                | 0.0              | 0.4     | 0.0   | 670               | 1.8  | 0.1   | 657               | 65.3                           | 0.0                     | 0.3               | 0.0      |

Web-table 2.6: Data quality indicators, patients diagnosed during 2000-2014, by continent, country and registry: PANCREAS

|                              | Calendar period | Patients submitted | Ineligible (%) ¶ |            |            | Eligible patients | Excluded (%) ¶¶ |            | Patients included | Data quality indicators (%) †† |                         |                   |            |
|------------------------------|-----------------|--------------------|------------------|------------|------------|-------------------|-----------------|------------|-------------------|--------------------------------|-------------------------|-------------------|------------|
|                              |                 |                    | Incomplete dates | In situ    | Other      |                   | DCO             | Other      |                   | MV                             | Non-specific morphology | Lost to follow-up | Censored   |
| Zürich                       | 2000-2013       | 2,718              | 0.0              | 0.0        | 0.4        | 2,705             | 6.8             | 0.1        | 2,519             | 79.8                           | 20.8                    | 0.2               | 2.3        |
| Switzerland (Childhood) †    | -               | -                  |                  |            |            |                   |                 |            |                   |                                |                         |                   |            |
| United Kingdom *             | 2000-2014       | 124,883            | 0.1              | 0.2        | 0.2        | 124,252           | 4.8             | 0.2        | 118,134           | 80.7                           | 16.2                    | 0.3               | 0.0        |
| England                      | 2000-2014       | 104,501            | 0.1              | 0.2        | 0.1        | 104,096           | 5.1             | 0.2        | 98,545            | 84.3                           | 16.9                    | 0.4               | 0.0        |
| Northern Ireland             | 2000-2014       | 2,959              | 0.0              | 0.1        | 1.9        | 2,897             | 2.5             | 0.0        | 2,824             | 47.1                           | 59.0                    | 0.0               | 0.0        |
| Scotland                     | 2000-2014       | 10,498             | 0.0              | 0.3        | 1.1        | 10,353            | 0.9             | 0.0        | 10,261            | 48.4                           | 1.3                     | 0.0               | 0.0        |
| Wales                        | 2000-2014       | 6,925              | 0.0              | 0.2        | 0.1        | 6,906             | 5.7             | 0.1        | 6,504             | 91.9                           | 10.3                    | 0.0               | 0.0        |
| <b>OCEANIA</b>               |                 | <b>41,869</b>      | <b>0.4</b>       | <b>0.3</b> | <b>0.7</b> | <b>41,292</b>     | <b>5.3</b>      | <b>0.2</b> | <b>39,014</b>     | <b>75.9</b>                    | <b>23.5</b>             | <b>0.0</b>        | <b>0.0</b> |
| Australia *                  | 2000-2014       | 35,450             | 0.5              | 0.3        | 0.9        | 34,873            | 4.3             | 0.2        | 33,319            | 80.6                           | 18.4                    | 0.0               | 0.0        |
| Australian Capital Territory | 2000-2013       | 396                | 0.0              | 0.0        | 1.0        | 392               | 6.1             | 0.3        | 367               | 92.9                           | 8.2                     | 0.0               | 0.5        |
| New South Wales              | 2000-2012       | 10,666             | 0.3              | 0.0        | 0.4        | 10,597            | 4.8             | 0.2        | 10,071            | 90.5                           | 11.3                    | 0.0               | 0.0        |
| Northern Territory           | 2000-2013       | 154                | 0.0              | 0.0        | 0.0        | 154               | 0.6             | 0.0        | 153               | 64.1                           | 1.3                     | 0.0               | 0.0        |
| Queensland                   | 2000-2014       | 7,410              | 1.8              | 1.0        | 3.3        | 6,963             | 3.8             | 0.2        | 6,680             | 92.6                           | 10.8                    | 0.0               | 0.0        |
| South Australia              | 2000-2013       | 2,851              | 0.0              | 0.0        | 0.1        | 2,846             | 0.1             | 0.2        | 2,835             | 63.8                           | 3.6                     | 0.0               | 0.0        |
| Tasmania                     | 2000-2013       | 928                | 0.0              | 0.3        | 1.4        | 912               | 3.5             | 0.0        | 880               | 64.0                           | 39.0                    | 0.0               | 0.0        |
| Victoria                     | 2000-2014       | 9,643              | 0.0              | 0.4        | 0.0        | 9,609             | 6.4             | 0.2        | 8,970             | 66.2                           | 35.7                    | 0.0               | 0.0        |
| Western Australia            | 2000-2014       | 3,402              | 0.0              | 0.0        | 0.1        | 3,400             | 1.0             | 0.1        | 3,363             | 83.7                           | 17.5                    | 0.0               | 0.0        |
| New Zealand *                | 2000-2014       | 6,419              | 0.0              | 0.0        | 0.0        | 6,419             | 11.0            | 0.3        | 5,695             | 48.5                           | 53.5                    | 0.0               | 0.0        |
| <b>Total</b>                 |                 | <b>1,354,633</b>   | <b>0.4</b>       | <b>0.3</b> | <b>1.0</b> | <b>1,331,481</b>  | <b>7.4</b>      | <b>0.3</b> | <b>1,229,379</b>  | <b>76.2</b>                    | <b>19.4</b>             | <b>0.2</b>        | <b>0.3</b> |

Web-table 2.7: Data quality indicators, patients diagnosed during 2000-2014, by continent, country and registry: LUNG

|                                    | Calendar period | Patients submitted | Ineligible (%) ¶ |            |            | Excluded (%) ¶¶   |             |            | Patients included | Data quality indicators (%) †† |                         |                   |             |
|------------------------------------|-----------------|--------------------|------------------|------------|------------|-------------------|-------------|------------|-------------------|--------------------------------|-------------------------|-------------------|-------------|
|                                    |                 |                    | Incomplete dates | In situ    | Other      | Eligible patients | DCO         | Other      |                   | MV                             | Non-specific morphology | Lost to follow-up | Censored    |
| <b>AFRICA</b>                      |                 | <b>3,084</b>       | <b>6.2</b>       | <b>0.0</b> | <b>1.0</b> | <b>2,863</b>      | <b>2.0</b>  | <b>2.5</b> | <b>2,734</b>      | <b>94.1</b>                    | <b>23.4</b>             | <b>1.6</b>        | <b>16.9</b> |
| Algerian registries                | 2000-2014       | 2,154              | 8.9              | 0.0        | 1.3        | 1,934             | 2.9         | 1.3        | 1,852             | 98.2                           | 19.4                    | 0.0               | 17.3        |
| Annaba                             | 2000-2014       | 484                | 16.5             | 0.0        | 5.8        | 376               | 4.3         | 0.8        | 357               | 90.5                           | 0.3                     | 0.0               | 70.6        |
| Sétif                              | 2000-2010       | 1,180              | 9.4              | 0.0        | 0.0        | 1,069             | 0.0         | 2.0        | 1,048             | 100.0                          | 25.8                    | 0.0               | 6.5         |
| Tlemcen                            | 2006-2014       | 490                | 0.0              | 0.0        | 0.2        | 489               | 8.4         | 0.2        | 447               | 100.0                          | 19.7                    | 0.0               | 0.2         |
| Mali (Bamako)                      | -               | -                  | -                | -          | -          | -                 | -           | -          | -                 | -                              | -                       | -                 | -           |
| Mauritius *                        | 2005-2012       | 631                | 0.0              | 0.0        | 0.0        | 631               | 0.0         | 7.4        | 584               | 94.0                           | 32.4                    | 0.0               | 0.3         |
| Morocco (Casablanca)               | -               | -                  | -                | -          | -          | -                 | -           | -          | -                 | -                              | -                       | -                 | -           |
| Nigeria (Ibadan)                   | -               | -                  | -                | -          | -          | -                 | -           | -          | -                 | -                              | -                       | -                 | -           |
| South Africa (Eastern Cape)        | 2000-2014       | 299                | 0.0              | 0.0        | 0.3        | 298               | 0.0         | 0.0        | 298               | 68.8                           | 31.2                    | 14.8              | 46.6        |
| <b>AMERICA (Central and South)</b> |                 | <b>100,004</b>     | <b>0.9</b>       | <b>0.0</b> | <b>0.2</b> | <b>98,873</b>     | <b>44.0</b> | <b>1.4</b> | <b>53,959</b>     | <b>87.4</b>                    | <b>13.7</b>             | <b>0.1</b>        | <b>1.0</b>  |
| Argentinian registries             | 2002-2013       | 6,572              | 1.9              | 0.0        | 0.2        | 6,437             | 19.2        | 0.1        | 5,195             | 90.7                           | 11.9                    | 0.0               | 0.1         |
| Chubut                             | 2008-2013       | 477                | 25.6             | 0.0        | 0.4        | 353               | 12.7        | 0.8        | 305               | 67.2                           | 40.0                    | 0.0               | 0.7         |
| Córdoba                            | 2004-2012       | 2,603              | 0.0              | 0.0        | 0.3        | 2,594             | 17.8        | 0.0        | 2,132             | 93.2                           | 9.5                     | 0.0               | 0.0         |
| Mendoza                            | 2003-2013       | 3,361              | 0.0              | 0.0        | 0.1        | 3,359             | 21.4        | 0.1        | 2,637             | 92.1                           | 9.9                     | 0.0               | 0.0         |
| Tierra del Fuego                   | 2005-2013       | 131                | 0.0              | 0.0        | 0.0        | 131               | 7.6         | 0.0        | 121               | 77.7                           | 28.9                    | 0.0               | 0.0         |
| Argentina (Childhood) †            | -               | -                  | -                | -          | -          | -                 | -           | -          | -                 | -                              | -                       | -                 | -           |
| Brazilian registries               | 2000-2014       | 6,369              | 2.6              | 0.0        | 0.2        | 6,192             | 20.8        | 0.4        | 4,884             | 91.7                           | 12.4                    | 0.0               | 0.0         |
| Aracaju                            | 2000-2012       | 783                | 0.3              | 0.1        | 0.0        | 780               | 14.6        | 0.0        | 666               | 92.6                           | 9.6                     | 0.0               | 0.0         |
| Cuiabá                             | -               | -                  | -                | -          | -          | -                 | -           | -          | -                 | -                              | -                       | -                 | -           |
| Curitiba                           | 2000-2012       | 3,175              | 0.0              | 0.0        | 0.1        | 3,172             | 27.7        | 0.0        | 2,293             | 88.9                           | 13.6                    | 0.0               | 0.0         |
| Goiânia                            | 2000-2012       | 2,106              | 7.6              | 0.0        | 0.3        | 1,939             | 14.6        | 1.1        | 1,635             | 96.0                           | 11.2                    | 0.1               | 0.0         |
| Jaú                                | 2000-2014       | 305                | 0.3              | 0.0        | 1.0        | 301               | 3.7         | 0.0        | 290               | 88.3                           | 15.9                    | 0.0               | 0.3         |
| São Paulo                          | -               | -                  | -                | -          | -          | -                 | -           | -          | -                 | -                              | -                       | -                 | -           |
| Chilean registries                 | 2000-2012       | 2,712              | 0.0              | 0.0        | 0.2        | 2,706             | 20.0        | 0.0        | 2,166             | 63.0                           | 32.7                    | 0.0               | 2.1         |
| Antofagasta                        | 2003-2010       | 1,347              | 0.0              | 0.0        | 0.1        | 1,345             | 24.1        | 0.0        | 1,021             | 69.5                           | 32.2                    | 0.0               | 2.5         |
| Biobio                             | 2003-2012       | 354                | 0.0              | 0.0        | 0.0        | 354               | 8.5         | 0.0        | 324               | 43.5                           | 61.7                    | 0.0               | 1.5         |
| Concepción                         | 2006-2010       | 568                | 0.0              | 0.0        | 0.5        | 565               | 18.9        | 0.0        | 458               | 63.3                           | 37.6                    | 0.0               | 2.0         |
| Los Rios                           | 2000-2012       | 443                | 0.0              | 0.0        | 0.2        | 442               | 17.9        | 0.0        | 363               | 61.7                           | 2.2                     | 0.0               | 1.7         |
| Colombian registries               | 2000-2014       | 4,707              | 2.7              | 0.0        | 0.8        | 4,541             | 11.8        | 0.9        | 3,965             | 70.2                           | 29.1                    | 0.0               | 10.3        |
| Bucaramanga                        | -               | -                  | -                | -          | -          | -                 | -           | -          | -                 | -                              | -                       | -                 | -           |
| Cali                               | 2000-2014       | 3,949              | 0.6              | 0.0        | 0.8        | 3,892             | 12.0        | 0.6        | 3,400             | 68.1                           | 30.1                    | 0.0               | 10.4        |
| Manizales                          | 2003-2012       | 499                | 20.0             | 0.0        | 0.4        | 397               | 3.8         | 4.0        | 366               | 86.3                           | 17.5                    | 0.0               | 15.0        |
| Pasto                              | 2000-2012       | 259                | 1.9              | 0.4        | 0.4        | 252               | 20.6        | 0.4        | 199               | 76.4                           | 33.2                    | 0.0               | 0.0         |
| Costa Rica *                       | 2002-2014       | 3,432              | 0.0              | 0.0        | 1.0        | 3,399             | 20.0        | 0.9        | 2,688             | 83.4                           | 20.8                    | 0.0               | 0.0         |
| Cuba *                             | 2000-2012       | 56,507             | 0.0              | 0.0        | 0.1        | 56,468            | 63.5        | 2.3        | 19,344            | 94.7                           | 4.7                     | 0.0               | 0.0         |
| Ecuadorian registries              | 2000-2013       | 3,592              | 3.7              | 0.1        | 0.5        | 3,436             | 22.5        | 0.6        | 2,641             | 78.1                           | 24.9                    | 0.2               | 1.2         |
| Cuenca                             | 2000-2012       | 207                | 18.4             | 0.0        | 0.0        | 169               | 13.0        | 0.0        | 147               | 81.6                           | 22.4                    | 0.0               | 15.0        |
| Guayaquil                          | 2005-2013       | 1,185              | 0.2              | 0.2        | 1.1        | 1,168             | 20.9        | 1.8        | 903               | 71.2                           | 33.0                    | 0.0               | 0.0         |
| Loja                               | 2000-2013       | 137                | 0.0              | 0.0        | 0.7        | 136               | 8.1         | 0.0        | 125               | 58.4                           | 44.8                    | 4.0               | 0.0         |
| Manabí                             | 2000-2013       | 705                | 6.2              | 0.1        | 0.6        | 656               | 38.1        | 0.0        | 406               | 66.0                           | 36.2                    | 0.0               | 0.5         |
| Quito                              | 2000-2013       | 1,358              | 3.7              | 0.0        | 0.1        | 1,307             | 18.9        | 0.0        | 1,060             | 90.5                           | 11.7                    | 0.0               | 0.8         |
| Guadeloupe *                       | 2008-2013       | 308                | 0.0              | 0.0        | 0.0        | 308               | 0.0         | 0.0        | 308               | 97.4                           | 8.4                     | 0.0               | 13.0        |
| Martinique *                       | 2000-2012       | 706                | 0.0              | 0.0        | 0.0        | 706               | 0.0         | 1.8        | 693               | 95.1                           | 0.3                     | 5.3               | 0.0         |
| Mexico (Childhood) †               | -               | -                  | -                | -          | -          | -                 | -           | -          | -                 | -                              | -                       | -                 | -           |
| Peru (Lima)                        | -               | -                  | -                | -          | -          | -                 | -           | -          | -                 | -                              | -                       | -                 | -           |
| Puerto Rico *                      | 2000-2011       | 8,198              | 3.8              | 0.1        | 0.8        | 7,805             | 15.8        | 0.0        | 6,570             | 94.0                           | 9.2                     | 0.0               | 0.0         |
| Uruguay *                          | 2008-2012       | 6,901              | 0.1              | 0.1        | 0.2        | 6,875             | 19.9        | 0.0        | 5,505             | 73.6                           | 27.7                    | 0.0               | 0.0         |
| <b>AMERICA (North)</b>             |                 | <b>2,671,343</b>   | <b>0.4</b>       | <b>0.1</b> | <b>0.4</b> | <b>2,647,026</b>  | <b>3.1</b>  | <b>0.0</b> | <b>2,564,507</b>  | <b>94.7</b>                    | <b>6.2</b>              | <b>0.3</b>        | <b>0.0</b>  |
| Canadian registries                | 2000-2014       | 242,780            | 0.1              | 0.1        | 0.2        | 241,929           | 2.2         | 0.0        | 236,434           | 88.4                           | 11.7                    | 0.0               | 0.0         |
| Alberta                            | 2000-2014       | 26,159             | 0.2              | 0.1        | 0.4        | 26,001            | 0.5         | 0.0        | 25,879            | 94.4                           | 6.6                     | 0.0               | 0.0         |
| British Columbia                   | 2000-2014       | 41,531             | 0.2              | 0.2        | 0.5        | 41,164            | 2.0         | 0.0        | 40,337            | 94.8                           | 5.6                     | 0.0               | 0.0         |
| Manitoba                           | 2000-2014       | 12,622             | 0.0              | 0.0        | 0.4        | 12,563            | 1.7         | 0.0        | 12,339            | 88.6                           | 12.1                    | 0.0               | 0.0         |
| New Brunswick                      | 2000-2014       | 10,106             | 0.0              | 0.1        | 0.3        | 10,059            | 0.4         | 0.0        | 10,015            | 82.4                           | 0.3                     | 0.0               | 0.0         |
| Newfoundland & Labrador            | 2000-2014       | 5,621              | 0.5              | 0.1        | 0.5        | 5,562             | 2.5         | 0.0        | 5,421             | 90.4                           | 10.4                    | 0.0               | 0.0         |
| Nova Scotia                        | 2000-2014       | 12,801             | 0.3              | 0.2        | 0.2        | 12,704            | 0.8         | 0.0        | 12,598            | 82.1                           | 19.0                    | 0.0               | 0.0         |
| Ontario                            | 2000-2014       | 121,776            | 0.0              | 0.0        | 0.0        | 121,766           | 3.0         | 0.1        | 118,061           | 85.9                           | 15.2                    | 0.0               | 0.0         |
| Prince Edward Island               | 2000-2014       | 1,766              | 0.0              | 0.1        | 0.0        | 1,764             | 2.3         | 0.0        | 1,724             | 85.0                           | 16.1                    | 0.0               | 0.1         |
| Saskatchewan                       | 2000-2014       | 10,398             | 0.0              | 0.1        | 0.4        | 10,346            | 2.8         | 0.0        | 10,060            | 90.2                           | 10.8                    | 0.0               | 0.0         |
| US registries                      | 2000-2014       | 2,428,563          | 0.4              | 0.1        | 0.5        | 2,405,097         | 3.2         | 0.0        | 2,328,073         | 95.3                           | 5.6                     | 0.4               | 0.0         |
| Alabama                            | 2000-2014       | 56,765             | 0.7              | 0.1        | 0.3        | 56,102            | 2.8         | 0.0        | 54,509            | 94.9                           | 5.9                     | 0.0               | 0.0         |
| Alaska                             | 2000-2013       | 4,507              | 1.2              | 0.1        | 0.4        | 4,434             | 2.1         | 0.0        | 4,341             | 93.1                           | 8.0                     | 0.0               | 0.0         |
| Arkansas                           | 2000-2011       | 30,209             | 0.1              | 0.1        | 0.3        | 30,075            | 2.6         | 0.0        | 29,276            | 96.9                           | 3.5                     | 0.0               | 0.0         |
| California                         | 2000-2011       | 206,123            | 1.1              | 0.0        | 0.5        | 202,663           | 1.5         | 0.0        | 199,541           | 95.3                           | 5.6                     | 0.0               | 0.0         |
| Greater Bay Area                   | 2000-2014       | 47,471             | 0.6              | 0.1        | 0.6        | 46,853            | 2.3         | 0.1        | 45,758            | 96.4                           | 4.3                     | 2.0               | 0.0         |
| Greater California                 | 2000-2014       | 150,635            | 1.2              | 0.1        | 0.4        | 148,042           | 1.4         | 0.0        | 145,911           | 94.3                           | 6.6                     | 1.8               | 0.0         |
| Los Angeles                        | 2000-2014       | 56,653             | 1.0              | 0.1        | 0.6        | 55,654            | 1.5         | 0.1        | 54,782            | 96.2                           | 4.6                     | 4.1               | 0.0         |
| Colorado                           | 2000-2013       | 29,293             | 0.2              | 0.1        | 0.5        | 29,053            | 4.9         | 0.0        | 27,632            | 93.8                           | 6.9                     | 0.0               | 0.0         |
| Connecticut                        | 2000-2014       | 38,240             | 0.1              | 0.1        | 0.5        | 37,937            | 2.1         | 0.0        | 37,127            | 96.7                           | 4.2                     | 0.9               | 0.0         |
| Delaware                           | 2000-2014       | 10,873             | 0.2              | 0.0        | 0.5        | 10,792            | 2.8         | 0.0        | 10,492            | 96.5                           | 4.0                     | 0.0               | 0.0         |
| Florida                            | 2000-2013       | 220,168            | 0.1              | 0.1        | 0.4        | 218,955           | 4.7         | 0.1        | 208,529           | 96.0                           | 5.9                     | 0.0               | 0.0         |
| Georgia                            | 2000-2014       | 87,605             | 0.0              | 0.1        | 0.5        | 87,059            | 2.7         | 0.0        | 84,697            | 96.2                           | 4.5                     | 0.0               | 0.0         |
| Atlanta                            | 2000-2014       | 20,881             | 0.0              | 0.1        | 0.8        | 20,686            | 2.1         | 0.0        | 20,251            | 97.1                           | 3.4                     | 0.0               | 0.0         |
| Hawaii                             | 2000-2014       | 11,007             | 0.2              | 0.0        | 0.5        | 10,925            | 2.8         | 0.0        | 10,615            | 95.1                           | 5.6                     | 1.5               | 0.0         |
| Idaho                              | 2000-2014       | 11,830             | 0.3              | 0.1        | 0.5        | 11,719            | 4.4         | 0.0        | 11,196            | 93.5                           | 7.0                     | 0.0               | 0.0         |
| Indiana                            | 2000-2014       | 75,975             | 0.3              | 0.1        | 0.3        | 75,414            | 2.6         | 0.0        | 73,402            | 95.1                           | 5.4                     | 0.0               | 0.0         |
| Iowa                               | 2000-2014       | 34,434             | 0.5              | 0.1        | 0.5        | 34,068            | 2.3         | 0.0        | 33,258            | 93.8                           | 6.7                     | 0.4               | 0.0         |
| Kentucky                           | 2000-2014       | 67,078             | 0.0              | 0.1        | 0.4        | 66,779            | 1.7         | 0.0        | 65,634            | 94.1                           | 6.3                     | 0.2               | 0.0         |
| Louisiana                          | 2000-2014       | 51,374             | 0.2              | 0.1        | 0.4        | 51,023            | 2.2         | 0.0        | 49,885            | 95.3                           | 5.4                     | 0.5               | 0.0         |
| Maine                              | 2000-2013       | 17,267             | 0.1              | 0.1        | 0.4        | 17,176            | 3.1         | 0.0        | 16,641            | 94.0                           | 6.4                     | 0.0               | 0.0         |
| Massachusetts                      | 2000-2009       | 48,946             | 0.0              | 0.1        | 0.5        | 48,669            | 3.0         | 0.0        | 47,206            | 94.1                           | 6.4                     | 0.0               | 0.0         |
| Michigan                           | 2000-2013       | 106,118            | 0.3              | 0.1        | 0.5        | 105,239           | 1.8         | 0.0        | 103,258           | 93.8                           | 7.0                     | 0.0               | 0.0         |

Web-table 2.7: Data quality indicators, patients diagnosed during 2000-2014, by continent, country and registry: LUNG

|                     | Calendar period | Patients submitted | Ineligible (%) ¶ |            |            | Excluded (%) ¶¶   |            |            | Patients included | Data quality indicators (%) †† |                         |                   |            |
|---------------------|-----------------|--------------------|------------------|------------|------------|-------------------|------------|------------|-------------------|--------------------------------|-------------------------|-------------------|------------|
|                     |                 |                    | Incomplete dates | In situ    | Other      | Eligible patients | DCO        | Other      |                   | MV                             | Non-specific morphology | Lost to follow-up | Censored   |
| Detroit             | 2000-2014       | 47,619             | 0.5              | 0.1        | 0.6        | 47,080            | 2.6        | 0.0        | 45,830            | 97.5                           | 2.9                     | 0.8               | 0.0        |
| Minnesota           | 2000-2013       | 41,353             | 0.0              | 0.1        | 0.6        | 41,047            | 4.0        | 0.0        | 39,372            | 99.6                           | 0.8                     | 0.0               | 0.0        |
| Mississippi         | 2002-2014       | 31,027             | 0.3              | 0.1        | 0.4        | 30,787            | 2.9        | 0.0        | 29,898            | 97.0                           | 3.6                     | 0.0               | 0.0        |
| Missouri            | -               | -                  | -                | -          | -          | -                 | -          | -          | -                 | -                              | -                       | -                 | -          |
| Montana             | 2000-2014       | 10,419             | 0.6              | 0.1        | 0.4        | 10,300            | 4.8        | 0.0        | 9,799             | 95.6                           | 4.8                     | 0.0               | 0.0        |
| Nebraska            | 2000-2014       | 17,629             | 0.3              | 0.1        | 0.6        | 17,472            | 2.6        | 0.0        | 17,005            | 94.9                           | 5.5                     | 0.0               | 0.0        |
| New Hampshire       | 2000-2014       | 14,508             | 0.2              | 0.1        | 0.4        | 14,416            | 2.8        | 0.0        | 14,002            | 93.7                           | 7.0                     | 0.0               | 0.0        |
| New Jersey          | 2000-2014       | 88,028             | 0.6              | 0.1        | 0.6        | 86,937            | 2.7        | 0.0        | 84,572            | 95.9                           | 4.9                     | 8.4               | 0.0        |
| New Mexico          | 2000-2014       | 13,899             | 0.0              | 0.1        | 0.5        | 13,812            | 7.0        | 0.0        | 12,845            | 93.8                           | 8.3                     | 1.1               | 0.1        |
| New York            | 2000-2014       | 195,912            | 1.5              | 0.1        | 0.6        | 191,622           | 2.1        | 0.0        | 187,436           | 95.7                           | 5.0                     | 0.0               | 0.0        |
| New York City       | 2000-2014       | 62,137             | 2.0              | 0.1        | 0.7        | 60,361            | 1.8        | 0.0        | 59,274            | 97.4                           | 3.3                     | 0.0               | 0.0        |
| North Carolina      | 2000-2014       | 102,261            | 0.0              | 0.1        | 0.3        | 101,816           | 3.2        | 0.0        | 98,489            | 96.0                           | 4.7                     | 0.0               | 0.0        |
| Ohio                | 2000-2014       | 139,849            | 0.0              | 0.1        | 0.4        | 139,101           | 4.7        | 0.0        | 132,512           | 95.9                           | 5.6                     | 0.0               | 0.0        |
| Oklahoma            | 2000-2010       | 33,745             | 0.3              | 0.1        | 0.3        | 33,504            | 5.0        | 0.0        | 31,817            | 95.0                           | 6.4                     | 0.0               | 0.0        |
| Oregon              | 2000-2013       | 36,310             | 0.0              | 0.1        | 0.4        | 36,141            | 2.6        | 0.0        | 35,196            | 90.5                           | 10.6                    | 0.0               | 0.0        |
| Pennsylvania        | 2000-2014       | 155,537            | 0.5              | 0.1        | 0.5        | 153,838           | 3.3        | 0.0        | 148,705           | 95.6                           | 5.0                     | 0.0               | 0.0        |
| Rhode Island        | 2000-2014       | 12,982             | 0.1              | 0.1        | 0.5        | 12,888            | 2.5        | 0.0        | 12,558            | 94.1                           | 6.4                     | 0.0               | 0.0        |
| South Carolina      | 2000-2014       | 51,715             | 0.0              | 0.1        | 0.4        | 51,460            | 3.2        | 0.0        | 49,817            | 93.7                           | 7.0                     | 0.0               | 0.0        |
| Tennessee           | 2000-2011       | 59,893             | 0.2              | 0.1        | 0.4        | 59,491            | 3.0        | 0.0        | 57,680            | 96.7                           | 3.8                     | 0.0               | 0.0        |
| Texas               | 2000-2013       | 179,135            | 0.6              | 0.1        | 0.4        | 177,037           | 5.2        | 0.0        | 167,827           | 95.1                           | 6.1                     | 0.0               | 0.0        |
| Utah                | 2000-2014       | 8,414              | 0.4              | 0.2        | 1.0        | 8,286             | 1.1        | 0.0        | 8,192             | 92.7                           | 8.6                     | 1.2               | 0.0        |
| Vermont             | 2000-2013       | 6,678              | 0.2              | 0.0        | 0.2        | 6,651             | 2.5        | 0.0        | 6,483             | 94.9                           | 5.7                     | 0.0               | 0.0        |
| Washington          | 2000-2008       | 35,697             | 0.5              | 0.1        | 0.3        | 35,381            | 1.9        | 0.1        | 34,674            | 94.4                           | 6.2                     | 0.0               | 0.0        |
| Seattle             | 2000-2014       | 41,027             | 0.5              | 0.2        | 0.5        | 40,552            | 1.4        | 0.0        | 39,973            | 94.7                           | 5.6                     | 0.5               | 0.0        |
| West Virginia       | 2000-2014       | 29,782             | 0.4              | 0.1        | 0.3        | 29,548            | 2.3        | 0.0        | 28,874            | 91.7                           | 9.1                     | 0.0               | 0.0        |
| Wisconsin           | 2000-2013       | 52,087             | 0.3              | 0.1        | 0.5        | 51,615            | 4.5        | 0.0        | 49,259            | 95.8                           | 5.0                     | 0.0               | 0.0        |
| Wyoming             | 2000-2013       | 3,891              | 0.1              | 0.0        | 0.5        | 3,865             | 1.1        | 0.1        | 3,822             | 95.3                           | 5.4                     | 0.0               | 0.0        |
| <b>ASIA</b>         |                 | <b>1,028,416</b>   | <b>0.4</b>       | <b>0.1</b> | <b>0.2</b> | <b>1,021,391</b>  | <b>6.8</b> | <b>0.2</b> | <b>950,362</b>    | <b>81.5</b>                    | <b>18.5</b>             | <b>0.3</b>        | <b>0.7</b> |
| Chinese registries  | 2003-2013       | 137,441            | 0.4              | 0.0        | 0.1        | 136,822           | 2.1        | 0.0        | 133,932           | 47.4                           | 56.1                    | 2.0               | 0.1        |
| Beijing             | 2003-2013       | 48,700             | 0.0              | 0.0        | 0.0        | 48,668            | 1.1        | 0.1        | 48,087            | 60.7                           | 39.5                    | 3.5               | 0.2        |
| Changle             | 2003-2013       | 1,858              | 3.4              | 0.0        | 0.1        | 1,794             | 1.0        | 0.4        | 1,769             | 52.9                           | 54.8                    | 1.1               | 0.0        |
| Cixian              | 2003-2013       | 2,656              | 0.0              | 0.0        | 0.0        | 2,656             | 3.2        | 0.0        | 2,571             | 68.7                           | 31.5                    | 0.0               | 0.0        |
| Dafeng              | 2003-2013       | 3,638              | 0.0              | 0.0        | 0.0        | 3,638             | 0.4        | 0.0        | 3,624             | 34.6                           | 75.0                    | 0.0               | 0.0        |
| Dalian              | 2003-2013       | 17,963             | 0.0              | 0.0        | 0.0        | 17,956            | 8.6        | 0.0        | 16,411            | 61.5                           | 42.8                    | 0.0               | 0.1        |
| Donghai             | 2003-2013       | 4,440              | 0.2              | 0.0        | 0.0        | 4,430             | 3.0        | 0.0        | 4,296             | 24.0                           | 76.8                    | 3.1               | 0.0        |
| Feicheng            | 2003-2013       | 4,067              | 0.0              | 0.0        | 0.0        | 4,067             | 0.4        | 0.0        | 4,048             | 61.8                           | 40.2                    | 2.4               | 0.0        |
| Ganyu               | 2003-2013       | 3,922              | 0.0              | 0.0        | 0.0        | 3,921             | 0.4        | 0.0        | 3,907             | 35.9                           | 66.2                    | 1.4               | 0.0        |
| Guanyun             | 2004-2013       | 3,133              | 0.0              | 0.0        | 0.0        | 3,133             | 2.2        | 0.0        | 3,065             | 33.3                           | 85.8                    | 1.6               | 0.0        |
| Haimen              | 2003-2013       | 8,553              | 0.0              | 0.0        | 0.1        | 8,541             | 1.3        | 0.0        | 8,429             | 17.3                           | 82.7                    | 0.3               | 0.0        |
| Haining             | 2003-2013       | 3,883              | 0.0              | 0.0        | 0.0        | 3,882             | 1.1        | 0.1        | 3,837             | 28.5                           | 79.5                    | 0.4               | 0.1        |
| Jianhu              | 2003-2013       | 3,426              | 0.0              | 0.0        | 0.0        | 3,426             | 0.0        | 0.0        | 3,426             | 32.0                           | 94.3                    | 5.4               | 0.0        |
| Jiashan             | 2003-2013       | 2,881              | 0.0              | 0.0        | 0.0        | 2,879             | 0.3        | 0.0        | 2,869             | 45.9                           | 54.3                    | 0.4               | 0.0        |
| Jintan              | 2003-2013       | 1,993              | 0.0              | 0.0        | 0.5        | 1,984             | 1.3        | 0.0        | 1,959             | 17.6                           | 82.4                    | 1.1               | 0.0        |
| Lianyungang         | 2008-2013       | 2,530              | 0.0              | 0.0        | 0.5        | 2,518             | 2.1        | 0.0        | 2,466             | 62.1                           | 57.5                    | 8.4               | 0.1        |
| Linzhou             | 2003-2013       | 1,913              | 0.0              | 0.0        | 0.1        | 1,912             | 3.0        | 0.0        | 1,855             | 38.5                           | 61.5                    | 0.0               | 0.0        |
| Qidong              | 2003-2013       | 8,531              | 0.0              | 0.0        | 0.0        | 8,530             | 0.1        | 0.0        | 8,522             | 17.8                           | 82.2                    | 0.5               | 0.0        |
| Sihui               | 2003-2013       | 1,687              | 2.0              | 0.0        | 0.0        | 1,654             | 5.1        | 0.2        | 1,566             | 18.8                           | 85.5                    | 2.2               | 0.3        |
| Taixing             | 2003-2013       | 3,486              | 12.0             | 0.0        | 0.0        | 3,066             | 0.1        | 0.0        | 3,062             | 17.5                           | 95.1                    | 1.2               | 0.0        |
| Yangzhong           | 2003-2013       | 830                | 0.0              | 0.0        | 0.0        | 830               | 0.5        | 0.0        | 826               | 29.7                           | 99.9                    | 0.0               | 0.0        |
| Zhongshan           | 2003-2013       | 7,351              | 0.0              | 0.0        | 0.2        | 7,337             | 0.0        | 0.0        | 7,337             | 57.5                           | 46.8                    | 0.0               | 0.0        |
| Cyprus *            | 2004-2014       | 2,833              | 0.5              | 0.0        | 0.4        | 2,809             | 11.4       | 0.0        | 2,489             | 98.1                           | 3.3                     | 0.0               | 10.6       |
| Hong Kong *         | -               | -                  | -                | -          | -          | -                 | -          | -          | -                 | -                              | -                       | -                 | -          |
| Indian registries   | 2000-2014       | 863                | 0.1              | 0.0        | 0.0        | 862               | 1.4        | 0.0        | 850               | 72.6                           | 49.1                    | 0.5               | 0.0        |
| Guwahati            | -               | -                  | -                | -          | -          | -                 | -          | -          | -                 | -                              | -                       | -                 | -          |
| Karunagappally      | 2000-2014       | 863                | 0.1              | 0.0        | 0.0        | 862               | 1.4        | 0.0        | 850               | 72.6                           | 49.1                    | 0.5               | 0.0        |
| Iran (Golestan)     | -               | -                  | -                | -          | -          | -                 | -          | -          | -                 | -                              | -                       | -                 | -          |
| Israel *            | 2000-2013       | 28,085             | 0.0              | 0.2        | 1.5        | 27,612            | 8.1        | 0.1        | 25,347            | 96.0                           | 5.6                     | 0.0               | 0.0        |
| Japanese registries | 2000-2014       | 339,277            | 0.6              | 0.1        | 0.3        | 336,107           | 17.7       | 0.0        | 276,444           | 87.6                           | 13.1                    | 0.0               | 0.9        |
| Aichi               | 2003-2013       | 53,167             | 0.2              | 0.1        | 0.3        | 52,799            | 13.4       | 0.0        | 45,734            | 90.6                           | 11.3                    | 0.0               | 1.0        |
| Akita               | 2010-2014       | 4,862              | 1.7              | 0.2        | 0.5        | 4,747             | 0.0        | 1.8        | 4,661             | 81.6                           | 22.8                    | 0.0               | 19.7       |
| Ehime               | 2007-2013       | 9,862              | 0.1              | 0.1        | 0.4        | 9,806             | 21.1       | 0.0        | 7,739             | 85.0                           | 16.2                    | 0.0               | 0.0        |
| Fukui               | 2003-2009       | 4,531              | 0.3              | 0.0        | 0.2        | 4,505             | 5.3        | 0.0        | 4,265             | 79.6                           | 22.5                    | 0.0               | 0.8        |
| Gunma               | 2003-2012       | 14,187             | 8.1              | 0.1        | 0.1        | 13,016            | 26.3       | 0.0        | 9,591             | 85.7                           | 2.2                     | 0.0               | 0.7        |
| Hiroshima           | 2004-2008       | 11,366             | 0.4              | 0.0        | 0.8        | 11,224            | 11.6       | 0.0        | 9,920             | 98.3                           | 2.0                     | 0.0               | 0.2        |
| Hyogo               | 2007-2012       | 28,691             | 0.4              | 0.1        | 0.4        | 28,443            | 24.3       | 0.0        | 21,520            | 90.2                           | 12.4                    | 0.0               | 0.6        |
| Ibaraki             | 2006-2012       | 14,889             | 0.3              | 0.2        | 0.3        | 14,777            | 17.5       | 0.0        | 12,192            | 88.8                           | 14.3                    | 0.0               | 0.4        |
| Kanagawa            | 2000-2013       | 68,355             | 0.0              | 0.1        | 0.1        | 68,254            | 25.6       | 0.1        | 50,763            | 87.1                           | 18.7                    | 0.0               | 0.0        |
| Miyagi              | 2000-2010       | 17,651             | 1.0              | 0.1        | 0.1        | 17,440            | 12.3       | 0.0        | 15,292            | 87.2                           | 13.2                    | 0.0               | 0.5        |
| Niigata             | 2000-2013       | 27,882             | 0.2              | 0.0        | 0.6        | 27,666            | 13.2       | 0.0        | 24,013            | 81.6                           | 0.8                     | 0.0               | 0.0        |
| Osaka               | 2000-2008       | 53,211             | 0.0              | 0.0        | 0.2        | 53,064            | 17.2       | 0.0        | 43,946            | 88.5                           | 14.9                    | 0.0               | 1.2        |
| Saga                | 2006-2013       | 4,938              | 0.4              | 0.1        | 0.4        | 4,892             | 12.0       | 0.0        | 4,303             | 85.5                           | 16.5                    | 0.0               | 0.0        |
| Tochigi             | 2006-2013       | 11,388             | 0.3              | 0.0        | 0.3        | 11,321            | 15.3       | 0.0        | 9,586             | 87.8                           | 14.1                    | 0.0               | 0.5        |
| Yamagata            | 2003-2013       | 11,303             | 0.6              | 0.1        | 0.4        | 11,186            | 7.8        | 0.0        | 10,317            | 81.2                           | 20.9                    | 0.0               | 0.3        |
| Yamanashi           | 2008-2012       | 2,994              | 0.2              | 0.1        | 0.6        | 2,967             | 12.3       | 0.0        | 2,602             | 85.3                           | 17.3                    | 0.0               | 0.1        |
| Jordan *            | 2000-2014       | 4,462              | 0.1              | 0.2        | 1.0        | 4,402             | 0.5        | 2.3        | 4,282             | 97.5                           | 4.7                     | 2.4               | 0.0        |
| Korea * ‡           | 2000-2014       | 258,348            | 0.4              | 0.0        | 0.0        | 257,346           | 0.0        | 0.0        | 257,345           | 85.2                           | 15.7                    | 0.0               | 0.0        |
| Kuwait *            | 2000-2013       | 586                | 0.2              | 0.2        | 0.0        | 584               | 4.3        | 0.0        | 559               | 100.0                          | 0.2                     | 1.3               | 0.0        |
| Malaysia (Penang)   | 2000-2013       | 2,970              | 0.3              | 0.0        | 0.0        | 2,962             | 2.3        | 1.0        | 2,863             | 86.4                           | 17.7                    | 0.0               | 3.9        |
| Mongolia *          | -               | -                  | -                | -          | -          | -                 | -          | -          | -                 | -                              | -                       | -                 | -          |
| Qatar *             | 2000-2014       | 600                | 0.0              | 0.0        | 0.2        | 599               | 1.8        | 0.2        | 587               | 94.9                           | 7.3                     | 0.0               | 44.8       |
| Singapore *         | 2000-2014       | 18,329             | 0.0              | 0.0        | 0.2        | 18,286            | 2.0        | 0.0        | 17,921            | 87.5                           | 2.6                     | 0.0               | 0.0        |
| Taiwan *            | 2000-2014       | 141,508            | 0.0              | 0.2        | 0.1        | 141,108           | 0.0        | 0.0        | 141,108           | 92.5                           | 0.5                     | 0.0               | 0.0        |

Web-table 2.7: Data quality indicators, patients diagnosed during 2000-2014, by continent, country and registry: LUNG

|                                | Calendar period | Patients submitted | Ineligible (%) ¶ |            |            | Excluded (%) ¶¶   |            |            | Patients included | Data quality indicators (%) †† |                         |                   |            |
|--------------------------------|-----------------|--------------------|------------------|------------|------------|-------------------|------------|------------|-------------------|--------------------------------|-------------------------|-------------------|------------|
|                                |                 |                    | Incomplete dates | In situ    | Other      | Eligible patients | DCO        | Other      |                   | MV                             | Non-specific morphology | Lost to follow-up | Censored   |
| Thai registries                | 2000-2014       | 32,346             | 0.0              | 0.0        | 0.4        | 32,225            | 5.9        | 4.5        | 28,865            | 54.0                           | 46.7                    | 0.0               | 1.8        |
| Bangkok                        | 2000-2012       | 14,595             | 0.0              | 0.0        | 0.6        | 14,502            | 4.9        | 10.0       | 12,337            | 43.5                           | 56.6                    | 0.0               | 0.0        |
| Khon Kaen                      | 2000-2014       | 3,814              | 0.0              | 0.0        | 0.1        | 3,811             | 4.2        | 0.1        | 3,649             | 52.9                           | 49.9                    | 0.0               | 4.1        |
| Lampang                        | 2000-2014       | 5,407              | 0.0              | 0.0        | 0.0        | 5,407             | 5.0        | 0.0        | 5,135             | 68.0                           | 32.1                    | 0.0               | 0.0        |
| Lamphun                        | 2000-2014       | 2,796              | 0.0              | 0.0        | 0.0        | 2,796             | 10.1       | 0.0        | 2,513             | 45.4                           | 54.6                    | 0.0               | 0.0        |
| Lopburi                        | 2000-2014       | 2,487              | 0.0              | 0.0        | 0.5        | 2,474             | 11.6       | 0.0        | 2,186             | 59.0                           | 41.0                    | 0.0               | 14.0       |
| Songkhla                       | 2000-2014       | 3,247              | 0.0              | 0.0        | 0.4        | 3,235             | 5.6        | 0.3        | 3,045             | 78.2                           | 25.1                    | 0.3               | 1.7        |
| Turkish registries             | 2000-2013       | 60,768             | 1.6              | 0.1        | 0.2        | 59,667            | 3.2        | 0.0        | 57,770            | 90.7                           | 10.9                    | 0.1               | 4.8        |
| Ankara                         | 2008-2012       | 12,793             | 0.0              | 0.2        | 0.4        | 12,718            | 1.3        | 0.0        | 12,557            | 99.2                           | 3.1                     | 0.0               | 1.0        |
| Antalya                        | 2006-2012       | 3,469              | 0.2              | 0.1        | 0.0        | 3,458             | 1.4        | 0.0        | 3,409             | 89.4                           | 12.2                    | 0.0               | 0.9        |
| Bursa                          | 2006-2012       | 7,075              | 4.9              | 0.0        | 0.1        | 6,720             | 3.7        | 0.0        | 6,474             | 86.9                           | 15.8                    | 0.0               | 0.0        |
| Edirne                         | 2006-2012       | 1,760              | 5.1              | 0.0        | 0.1        | 1,670             | 8.7        | 0.0        | 1,525             | 77.3                           | 26.4                    | 0.0               | 0.0        |
| Erzurum                        | 2006-2012       | 1,339              | 2.3              | 0.1        | 0.7        | 1,298             | 2.1        | 0.2        | 1,268             | 81.6                           | 23.9                    | 0.0               | 1.3        |
| Eskisehir                      | 2006-2012       | 2,294              | 0.0              | 0.0        | 0.0        | 2,293             | 2.8        | 0.1        | 2,226             | 90.4                           | 0.0                     | 1.6               | 0.1        |
| Izmir                          | 2000-2013       | 26,796             | 1.7              | 0.0        | 0.1        | 26,297            | 4.0        | 0.0        | 25,245            | 89.6                           | 11.9                    | 0.0               | 10.2       |
| Samsun                         | 2006-2012       | 3,274              | 0.0              | 0.3        | 0.1        | 3,262             | 3.3        | 0.0        | 3,154             | 88.6                           | 13.8                    | 0.4               | 0.0        |
| Trabzon                        | 2006-2012       | 1,968              | 0.5              | 0.3        | 0.1        | 1,951             | 2.0        | 0.0        | 1,912             | 86.1                           | 16.4                    | 0.0               | 0.7        |
| <b>EUROPE</b>                  |                 | <b>2,445,021</b>   | <b>0.1</b>       | <b>0.1</b> | <b>0.8</b> | <b>2,420,439</b>  | <b>4.1</b> | <b>0.1</b> | <b>2,317,434</b>  | <b>87.4</b>                    | <b>7.5</b>              | <b>0.3</b>        | <b>0.7</b> |
| Austria *                      | 2000-2014       | 63,047             | 0.0              | 0.1        | 0.3        | 62,809            | 9.5        | 1.2        | 56,130            | 95.5                           | 8.1                     | 0.0               | 0.0        |
| Belarus (Childhood) †          | -               | -                  | -                | -          | -          | -                 | -          | -          | -                 | -                              | -                       | -                 | -          |
| Belgium *                      | 2004-2014       | 83,792             | 0.0              | 0.2        | 0.0        | 83,591            | 0.0        | 0.0        | 83,551            | 94.0                           | 6.7                     | 0.5               | 0.0        |
| Bulgaria *                     | 2000-2014       | 57,273             | 0.0              | 0.0        | 0.0        | 57,273            | 12.3       | 0.0        | 50,210            | 74.4                           | 2.1                     | 0.0               | 0.0        |
| Croatia *                      | 2000-2014       | 45,014             | 0.0              | 0.0        | 0.0        | 45,004            | 7.2        | 0.0        | 41,744            | 76.2                           | 0.6                     | 0.0               | 0.0        |
| Czech Republic *               | 2000-2014       | 95,629             | 0.0              | 0.1        | 0.2        | 95,424            | 2.2        | 0.0        | 93,241            | 80.4                           | 3.8                     | 0.0               | 0.0        |
| Denmark *                      | 2000-2014       | 62,535             | 0.0              | 0.0        | 0.2        | 62,402            | 0.0        | 0.0        | 62,402            | 92.3                           | 13.0                    | 0.1               | 0.0        |
| Estonia *                      | 2000-2012       | 9,931              | 0.0              | 0.0        | 0.0        | 9,928             | 7.3        | 0.0        | 9,201             | 76.4                           | 3.9                     | 0.0               | 0.0        |
| Finland *                      | 2000-2014       | 35,283             | 0.9              | 0.0        | 0.6        | 34,741            | 8.0        | 0.0        | 31,950            | 86.7                           | 17.9                    | 0.0               | 0.0        |
| French registries              | 2000-2010       | 52,246             | 0.1              | 0.0        | 0.0        | 52,168            | 0.0        | 0.3        | 51,989            | 94.1                           | 0.7                     | 0.7               | 0.0        |
| Bas-Rhin                       | 2000-2010       | 6,167              | 0.0              | 0.0        | 0.0        | 6,165             | 0.0        | 0.1        | 6,157             | 94.7                           | 0.1                     | 0.3               | 0.0        |
| Basse Normandie                | -               | -                  | -                | -          | -          | -                 | -          | -          | -                 | -                              | -                       | -                 | -          |
| Burgundy Digestive             | -               | -                  | -                | -          | -          | -                 | -          | -          | -                 | -                              | -                       | -                 | -          |
| Calvados                       | 2000-2010       | 4,038              | 0.0              | 0.0        | 0.0        | 4,038             | 0.0        | 0.0        | 4,036             | 92.8                           | 1.4                     | 0.2               | 0.0        |
| Calvados Digestive             | -               | -                  | -                | -          | -          | -                 | -          | -          | -                 | -                              | -                       | -                 | -          |
| Côte-d'Or Gynaecologic         | -               | -                  | -                | -          | -          | -                 | -          | -          | -                 | -                              | -                       | -                 | -          |
| Côte-d'Or Haematopoietic       | -               | -                  | -                | -          | -          | -                 | -          | -          | -                 | -                              | -                       | -                 | -          |
| Doubs                          | 2000-2010       | 3,001              | 0.0              | 0.0        | 0.0        | 3,001             | 0.0        | 0.1        | 2,998             | 96.6                           | 0.3                     | 0.3               | 0.0        |
| Finistère                      | -               | -                  | -                | -          | -          | -                 | -          | -          | -                 | -                              | -                       | -                 | -          |
| Gironde CNS                    | -               | -                  | -                | -          | -          | -                 | -          | -          | -                 | -                              | -                       | -                 | -          |
| Gironde General                | 2005-2010       | 3,479              | 1.3              | 0.0        | 0.0        | 3,434             | 0.0        | 0.1        | 3,432             | 90.9                           | 0.5                     | 1.3               | 0.0        |
| Gironde Haematopoietic         | -               | -                  | -                | -          | -          | -                 | -          | -          | -                 | -                              | -                       | -                 | -          |
| Haut-Rhin                      | 2000-2010       | 3,970              | 0.0              | 0.0        | 0.0        | 3,969             | 0.0        | 0.2        | 3,961             | 97.1                           | 0.6                     | 1.5               | 0.0        |
| Haute-Vienne                   | 2009-2009       | 165                | 0.0              | 0.0        | 0.0        | 165               | 0.0        | 0.0        | 165               | 92.7                           | 0.0                     | 0.6               | 0.0        |
| Hérault                        | 2000-2010       | 6,189              | 0.0              | 0.0        | 0.0        | 6,187             | 0.0        | 0.3        | 6,167             | 93.6                           | 0.1                     | 0.7               | 0.0        |
| Isère                          | 2000-2010       | 6,241              | 0.0              | 0.0        | 0.0        | 6,241             | 0.0        | 0.4        | 6,216             | 93.1                           | 0.6                     | 0.2               | 0.0        |
| Lille Metro                    | 2008-2010       | 1,360              | 0.0              | 0.0        | 0.0        | 1,360             | 0.0        | 0.1        | 1,359             | 87.3                           | 1.3                     | 0.3               | 0.0        |
| Loire-Atlantique               | 2000-2010       | 8,892              | 0.3              | 0.0        | 0.0        | 8,865             | 0.0        | 1.1        | 8,770             | 95.8                           | 0.9                     | 1.1               | 0.0        |
| Manche                         | 2000-2010       | 2,881              | 0.0              | 0.0        | 0.0        | 2,881             | 0.0        | 0.2        | 2,874             | 95.2                           | 1.3                     | 0.5               | 0.0        |
| Somme                          | 2000-2010       | 3,557              | 0.0              | 0.0        | 0.0        | 3,556             | 0.0        | 0.2        | 3,548             | 92.3                           | 1.3                     | 1.0               | 0.0        |
| Tarn                           | 2000-2010       | 2,306              | 0.0              | 0.0        | 0.0        | 2,306             | 0.0        | 0.0        | 2,306             | 94.2                           | 1.1                     | 0.4               | 0.0        |
| France Childhood Haem †        | -               | -                  | -                | -          | -          | -                 | -          | -          | -                 | -                              | -                       | -                 | -          |
| France Childhood Solid †       | -               | -                  | -                | -          | -          | -                 | -          | -          | -                 | -                              | -                       | -                 | -          |
| German registries              | 2000-2014       | 251,967            | 0.7              | 0.1        | 0.6        | 248,429           | 14.3       | 0.0        | 212,897           | 94.0                           | 1.2                     | 0.2               | 6.5        |
| Brandenburg                    | 2000-2014       | 25,314             | 0.0              | 0.1        | 0.7        | 25,110            | 11.9       | 0.0        | 22,123            | 92.5                           | 1.1                     | 0.0               | 8.4        |
| Bremen                         | 2000-2013       | 7,875              | 0.0              | 0.1        | 0.8        | 7,802             | 8.2        | 0.0        | 7,165             | 91.8                           | 0.4                     | 1.4               | 0.0        |
| Hamburg                        | 2000-2013       | 17,406             | 0.0              | 0.0        | 0.0        | 17,403            | 12.0       | 0.0        | 15,312            | 99.1                           | 1.0                     | 1.5               | 0.0        |
| Lower Saxony                   | 2003-2013       | 57,244             | 3.1              | 0.0        | 0.3        | 55,286            | 15.1       | 0.0        | 46,919            | 99.4                           | 0.8                     | 0.0               | 9.0        |
| Mecklenburg-W. Pomerania       | 2000-2014       | 17,480             | 0.0              | 0.2        | 0.6        | 17,341            | 10.3       | 0.0        | 15,550            | 93.0                           | 0.6                     | 0.0               | 7.7        |
| Rhineland Palatinate           | 2000-2013       | 32,708             | 0.0              | 0.2        | 1.1        | 32,295            | 21.6       | 0.0        | 25,318            | 83.8                           | 0.2                     | 0.0               | 10.5       |
| Saarland                       | 2000-2012       | 10,713             | 0.0              | 0.2        | 0.7        | 10,623            | 11.3       | 0.1        | 9,415             | 96.1                           | 4.7                     | 0.0               | 0.0        |
| Saxony                         | 2000-2014       | 36,940             | 0.0              | 0.1        | 0.7        | 36,642            | 9.7        | 0.0        | 33,098            | 90.3                           | 1.8                     | 0.0               | 6.9        |
| Schleswig-Holstein             | 2000-2012       | 26,266             | 0.0              | 0.1        | 0.6        | 26,100            | 20.2       | 0.0        | 20,816            | 97.6                           | 2.6                     | 0.0               | 0.0        |
| Thuringia                      | 2000-2014       | 20,021             | 0.0              | 0.2        | 0.8        | 19,827            | 13.3       | 0.0        | 17,181            | 94.7                           | 0.5                     | 0.0               | 8.8        |
| Gibraltar *                    | 2000-2010       | 73                 | 9.6              | 1.4        | 0.0        | 65                | 0.0        | 3.1        | 63                | 98.4                           | 1.6                     | 0.0               | 20.6       |
| Greece (National Paediatric) † | -               | -                  | -                | -          | -          | -                 | -          | -          | -                 | -                              | -                       | -                 | -          |
| Iceland *                      | 2000-2014       | 2,357              | 0.0              | 0.0        | 0.8        | 2,337             | 1.0        | 0.0        | 2,314             | 92.6                           | 7.6                     | 0.0               | 0.0        |
| Ireland *                      | 2000-2013       | 27,723             | 0.0              | 0.2        | 0.2        | 27,611            | 2.8        | 0.0        | 26,838            | 81.4                           | 1.8                     | 0.0               | 0.0        |
| Italian registries             | 2000-2014       | 206,157            | 0.0              | 0.0        | 0.1        | 205,876           | 1.1        | 0.0        | 203,548           | 74.1                           | 29.2                    | 0.4               | 0.4        |
| Alto Adige                     | 2000-2010       | 2,417              | 0.0              | 0.0        | 0.0        | 2,417             | 2.2        | 0.0        | 2,364             | 84.8                           | 16.1                    | 0.0               | 0.0        |
| Barletta-Andria-Trani          | 2006-2012       | 1,198              | 0.0              | 0.0        | 0.0        | 1,198             | 2.1        | 0.0        | 1,173             | 67.0                           | 34.5                    | 0.8               | 0.0        |
| Basilicata                     | 2006-2010       | 1,394              | 0.0              | 0.0        | 0.1        | 1,392             | 0.0        | 0.0        | 1,392             | 68.8                           | 34.1                    | 0.3               | 0.6        |
| Bergamo                        | 2007-2012       | 4,346              | 0.0              | 0.0        | 0.1        | 4,343             | 0.0        | 0.0        | 4,341             | 76.2                           | 30.8                    | 0.4               | 0.0        |
| Biella-Vercelli                | 2000-2010       | 2,419              | 0.0              | 0.0        | 0.3        | 2,411             | 1.1        | 0.1        | 2,381             | 71.1                           | 31.0                    | 0.1               | 1.7        |
| Brescia                        | 2000-2008       | 6,235              | 0.0              | 0.0        | 0.0        | 6,232             | 0.0        | 0.0        | 6,232             | 61.8                           | 43.6                    | 0.3               | 0.0        |
| Brindisi                       | 2006-2008       | 683                | 0.0              | 0.0        | 0.0        | 683               | 0.0        | 0.0        | 683               | 66.5                           | 35.9                    | 0.4               | 0.1        |
| Caserta                        | 2008-2010       | 1,422              | 0.0              | 0.0        | 0.1        | 1,421             | 0.0        | 0.1        | 1,420             | 78.0                           | 22.7                    | 0.0               | 1.8        |
| Catania-Messina-Enna           | 2003-2012       | 9,518              | 0.0              | 0.0        | 0.0        | 9,518             | 1.9        | 0.0        | 9,334             | 73.5                           | 34.4                    | 0.0               | 1.5        |
| Catanzaro                      | 2003-2009       | 836                | 0.0              | 0.0        | 0.0        | 836               | 0.1        | 0.0        | 835               | 73.2                           | 29.3                    | 0.2               | 0.1        |
| Como                           | 2003-2011       | 3,306              | 0.0              | 0.0        | 0.0        | 3,306             | 0.1        | 0.0        | 3,302             | 77.1                           | 25.1                    | 0.5               | 0.0        |
| Cremona                        | 2005-2010       | 1,606              | 0.0              | 0.0        | 0.0        | 1,606             | 1.5        | 0.0        | 1,582             | 73.8                           | 29.1                    | 1.2               | 0.0        |
| Ferrara                        | 2000-2011       | 4,233              | 0.0              | 0.0        | 0.0        | 4,232             | 0.7        | 0.0        | 4,204             | 74.4                           | 26.2                    | 0.6               | 0.0        |
| Friuli-Venezia-Giulia          | 2000-2010       | 9,643              | 0.0              | 0.0        | 0.0        | 9,640             | 5.3        | 0.0        | 9,129             | 78.9                           | 23.8                    | 0.2               | 0.0        |
| Genoa                          | 2000-2009       | 8,106              | 0.0              | 0.0        | 1.0        | 8,023             | 0.2        | 0.0        | 8,003             | 68.5                           | 33.5                    | 0.0               | 0.0        |
| Latina                         | 2000-2011       | 3,643              | 0.0              | 0.0        | 0.0        | 3,643             | 0.0        | 0.0        | 3,642             | 63.6                           | 37.6                    | 1.6               | 0.7        |
| Lecce                          | 2003-2008       | 3,213              | 0.0              | 0.0        | 0.0        | 3,213             | 0.0        | 0.0        | 3,213             | 68.6                           | 34.5                    | 0.1               | 1.0        |

Web-table 2.7: Data quality indicators, patients diagnosed during 2000-2014, by continent, country and registry: LUNG

|                      | Calendar period | Patients submitted | Ineligible (%) ¶ |         |       | Excluded (%) ¶¶   |      |       | Patients included | Data quality indicators (%) †† |                         |                   |          |
|----------------------|-----------------|--------------------|------------------|---------|-------|-------------------|------|-------|-------------------|--------------------------------|-------------------------|-------------------|----------|
|                      |                 |                    | Incomplete dates | In situ | Other | Eligible patients | DCO  | Other |                   | MV                             | Non-specific morphology | Lost to follow-up | Censored |
| Mantova              | 2000-2010       | 3,150              | 0.0              | 0.0     | 0.0   | 3,150             | 1.8  | 0.1   | 3,090             | 76.5                           | 28.8                    | 0.0               | 0.1      |
| Milano               | 2000-2012       | 17,985             | 0.0              | 0.0     | 0.0   | 17,978            | 0.1  | 0.0   | 17,956            | 73.8                           | 28.7                    | 1.6               | 0.7      |
| Modena               | 2000-2012       | 6,422              | 0.0              | 0.0     | 0.3   | 6,399             | 0.0  | 0.0   | 6,397             | 77.2                           | 23.5                    | 0.0               | 0.9      |
| Monza-Brianza        | 2007-2012       | 3,201              | 0.0              | 0.0     | 0.0   | 3,200             | 0.1  | 0.0   | 3,196             | 71.3                           | 32.4                    | 0.5               | 0.0      |
| Naples               | 2000-2012       | 5,419              | 0.0              | 0.0     | 0.0   | 5,419             | 0.0  | 0.0   | 5,417             | 76.3                           | 25.4                    | 0.9               | 0.5      |
| Nuoro                | 2003-2012       | 958                | 0.0              | 0.0     | 0.1   | 957               | 1.8  | 0.0   | 940               | 71.9                           | 31.5                    | 0.0               | 0.0      |
| Palermo              | 2003-2012       | 6,316              | 0.0              | 0.0     | 0.0   | 6,315             | 4.4  | 0.0   | 6,034             | 75.8                           | 28.0                    | 0.3               | 0.0      |
| Parma                | 2000-2014       | 4,822              | 0.0              | 0.1     | 0.2   | 4,806             | 0.5  | 0.0   | 4,781             | 76.9                           | 27.0                    | 0.7               | 0.0      |
| Pavia                | 2003-2009       | 3,145              | 0.0              | 0.0     | 0.1   | 3,143             | 0.2  | 0.0   | 3,138             | 67.8                           | 36.6                    | 0.2               | 0.6      |
| Piacenza             | 2006-2011       | 1,380              | 0.0              | 0.0     | 0.0   | 1,380             | 0.0  | 0.0   | 1,380             | 72.5                           | 28.6                    | 0.4               | 1.0      |
| Ragusa               | 2000-2012       | 2,589              | 0.0              | 0.1     | 0.4   | 2,577             | 2.6  | 0.0   | 2,509             | 68.3                           | 42.9                    | 0.3               | 0.0      |
| Reggio Emilia        | 2000-2012       | 4,511              | 0.0              | 0.0     | 0.0   | 4,510             | 0.0  | 0.0   | 4,510             | 78.0                           | 31.1                    | 0.7               | 0.0      |
| Romagna              | 2000-2012       | 11,730             | 0.0              | 0.1     | 0.0   | 11,714            | 0.2  | 0.0   | 11,688            | 77.4                           | 24.0                    | 0.1               | 0.0      |
| Salerno              | 2000-2009       | 5,524              | 0.0              | 0.0     | 0.0   | 5,523             | 0.0  | 0.0   | 5,521             | 66.6                           | 35.4                    | 1.0               | 2.0      |
| Sassari              | 2000-2011       | 3,041              | 0.0              | 0.0     | 0.0   | 3,041             | 3.7  | 0.0   | 2,930             | 78.2                           | 28.5                    | 0.0               | 0.0      |
| Siracusa             | 2000-2012       | 2,561              | 0.0              | 0.0     | 0.0   | 2,561             | 3.4  | 0.0   | 2,475             | 70.9                           | 32.3                    | 0.0               | 0.8      |
| Sondrio              | 2000-2011       | 1,603              | 0.0              | 0.0     | 0.1   | 1,602             | 0.1  | 0.0   | 1,601             | 76.0                           | 26.5                    | 0.0               | 0.1      |
| Taranto              | 2006-2012       | 2,284              | 0.0              | 0.0     | 0.0   | 2,284             | 2.2  | 0.0   | 2,232             | 77.9                           | 24.5                    | 0.4               | 0.0      |
| Trapani              | 2002-2010       | 1,848              | 0.0              | 0.0     | 0.0   | 1,848             | 0.8  | 0.0   | 1,834             | 68.5                           | 45.7                    | 0.2               | 0.1      |
| Trento               | 2000-2010       | 2,590              | 0.0              | 0.0     | 0.0   | 2,590             | 1.5  | 0.0   | 2,550             | 77.7                           | 26.3                    | 0.8               | 0.0      |
| Turin                | 2000-2012       | 9,322              | 0.0              | 0.0     | 0.5   | 9,279             | 2.7  | 0.0   | 9,029             | 78.0                           | 26.3                    | 0.5               | 0.0      |
| Tuscany              | 2000-2009       | 8,698              | 0.0              | 0.1     | 0.3   | 8,657             | 1.1  | 0.1   | 8,549             | 71.3                           | 31.4                    | 0.0               | 0.8      |
| Umbria               | 2000-2013       | 8,097              | 0.0              | 0.0     | 0.0   | 8,096             | 0.4  | 0.0   | 8,067             | 85.0                           | 15.8                    | 0.1               | 0.2      |
| Varese               | 2000-2012       | 7,379              | 0.0              | 0.0     | 0.0   | 7,377             | 0.4  | 0.0   | 7,347             | 75.1                           | 26.0                    | 0.3               | 0.2      |
| Veneto               | 2000-2009       | 16,203             | 0.0              | 0.0     | 0.0   | 16,195            | 1.1  | 0.0   | 16,015            | 72.2                           | 31.8                    | 0.3               | 0.4      |
| Viterbo              | 2006-2010       | 1,161              | 0.0              | 0.0     | 0.0   | 1,161             | 2.5  | 0.0   | 1,132             | 77.3                           | 23.3                    | 0.0               | 6.8      |
| Piedmont Childhood   | -               | -                  | -                | -       | -     | -                 | -    | -     | -                 | -                              | -                       | -                 | -        |
| Latvia *             | 2000-2014       | 17,282             | 0.0              | 0.0     | 43.8  | 9,717             | 0.0  | 0.3   | 9,691             | 100.0                          | 1.1                     | 0.0               | 0.0      |
| Lithuania *          | 2000-2012       | 20,345             | 0.0              | 0.0     | 0.1   | 20,316            | 8.9  | 0.0   | 18,499            | 71.5                           | 2.0                     | 0.0               | 0.1      |
| Malta *              | 2000-2013       | 2,155              | 0.0              | 0.0     | 0.4   | 2,147             | 4.6  | 0.2   | 2,043             | 84.2                           | 17.6                    | 0.0               | 0.0      |
| Netherlands *        | 2000-2014       | 160,836            | 0.0              | 0.1     | 0.0   | 160,609           | 0.3  | 0.1   | 159,895           | 91.3                           | 8.9                     | 0.2               | 0.0      |
| Norway *             | 2000-2014       | 39,184             | 0.0              | 0.3     | 13.6  | 33,759            | 0.6  | 0.0   | 33,558            | 99.7                           | 0.7                     | 0.1               | 0.0      |
| Poland *             | 2000-2014       | 317,241            | 0.0              | 0.0     | 0.0   | 317,217           | 3.3  | 0.2   | 306,136           | 86.9                           | 0.5                     | 0.0               | 0.0      |
| Greater Poland       | 2000-2014       | 26,932             | 0.0              | 0.0     | 0.0   | 26,932            | 5.8  | 0.3   | 25,296            | 90.9                           | 0.3                     | 0.0               | 0.0      |
| Holy Cross           | 2000-2014       | 11,493             | 0.0              | 0.0     | 0.0   | 11,493            | 2.1  | 0.1   | 11,236            | 94.7                           | 0.7                     | 0.0               | 0.0      |
| Kujavia-Pomerania    | 2000-2014       | 19,431             | 0.0              | 0.0     | 0.0   | 19,430            | 1.2  | 0.2   | 19,156            | 96.7                           | 0.2                     | 0.0               | 0.0      |
| Lesser Poland        | 2000-2014       | 25,483             | 0.0              | 0.0     | 0.0   | 25,483            | 4.8  | 0.1   | 24,238            | 89.3                           | 1.4                     | 0.0               | 0.0      |
| Łódź                 | 2000-2014       | 20,691             | 0.0              | 0.0     | 0.0   | 20,689            | 1.0  | 1.2   | 20,222            | 78.5                           | 0.1                     | 0.0               | 0.0      |
| Lower Silesia        | 2000-2014       | 27,886             | 0.0              | 0.0     | 0.0   | 27,880            | 0.5  | 0.0   | 27,732            | 74.0                           | 1.2                     | 0.1               | 0.0      |
| Lublin               | 2000-2014       | 17,973             | 0.0              | 0.0     | 0.0   | 17,972            | 8.7  | 0.2   | 16,369            | 77.8                           | 0.2                     | 0.0               | 0.0      |
| Lubush               | 2000-2014       | 8,096              | 0.0              | 0.0     | 0.0   | 8,095             | 2.6  | 0.1   | 7,874             | 88.8                           | 0.4                     | 0.0               | 0.0      |
| Mazovia              | 2000-2014       | 37,973             | 0.0              | 0.0     | 0.0   | 37,973            | 0.0  | 0.1   | 37,954            | 87.3                           | 0.1                     | 0.0               | 0.0      |
| Opole                | 2000-2014       | 8,114              | 0.0              | 0.0     | 0.0   | 8,114             | 0.1  | 0.2   | 8,089             | 95.0                           | 0.1                     | 0.0               | 0.0      |
| Podlaha              | 2000-2014       | 8,340              | 0.0              | 0.0     | 0.0   | 8,340             | 10.3 | 0.2   | 7,466             | 76.2                           | 0.7                     | 0.0               | 0.0      |
| Pomerania            | 2000-2014       | 21,962             | 0.0              | 0.0     | 0.0   | 21,962            | 10.4 | 0.2   | 19,638            | 95.0                           | 0.0                     | 0.0               | 0.0      |
| Silesia              | 2000-2014       | 38,618             | 0.0              | 0.0     | 0.0   | 38,611            | 1.3  | 0.1   | 38,051            | 86.3                           | 0.7                     | 0.0               | 0.0      |
| Subcarpathia         | 2000-2014       | 14,837             | 0.0              | 0.0     | 0.0   | 14,836            | 3.7  | 0.6   | 14,198            | 94.1                           | 0.2                     | 0.0               | 0.0      |
| Varmia-Mazuria       | 2000-2014       | 13,429             | 0.0              | 0.0     | 0.0   | 13,425            | 0.6  | 0.3   | 13,309            | 92.8                           | 0.5                     | 0.0               | 0.0      |
| West Pomerania       | 2000-2014       | 15,983             | 0.0              | 0.0     | 0.0   | 15,982            | 4.0  | 0.2   | 15,308            | 81.7                           | 0.0                     | 0.0               | 0.0      |
| Portugal *           | 2000-2014       | 41,146             | 0.4              | 0.2     | 0.9   | 40,538            | 0.3  | 0.0   | 40,422            | 94.3                           | 4.5                     | 1.1               | 0.0      |
| Azores               | 2000-2014       | 1,780              | 0.0              | 0.0     | 0.0   | 1,780             | 6.2  | 0.0   | 1,669             | 85.7                           | 14.9                    | 0.5               | 0.5      |
| Portugal Central     | 2003-2010       | 3,542              | 0.8              | 0.0     | 0.1   | 3,513             | 0.0  | 0.0   | 3,513             | 95.2                           | 6.7                     | 0.7               | 0.0      |
| Portugal North       | 2000-2010       | 11,229             | 1.2              | 0.0     | 0.7   | 11,019            | 0.0  | 0.0   | 11,019            | 95.2                           | 7.0                     | 0.0               | 0.0      |
| Portugal South       | 2000-2014       | 24,595             | 0.0              | 0.3     | 1.2   | 24,226            | 0.0  | 0.0   | 24,221            | 94.3                           | 2.3                     | 1.7               | 0.0      |
| Romania (Cluj)       | 2006-2012       | 2,887              | 0.0              | 0.0     | 0.7   | 2,867             | 25.8 | 0.0   | 2,126             | 80.5                           | 20.1                    | 0.0               | 0.0      |
| Russian registries ‡ | 2000-2014       | 43,652             | 0.0              | 0.0     | 0.2   | 43,571            | 0.9  | 1.7   | 42,434            | 68.2                           | 5.8                     | 1.6               | 0.4      |
| Arkhangelsk          | 2000-2014       | 8,432              | 0.0              | 0.0     | 0.0   | 8,432             | 1.1  | 0.8   | 8,279             | 69.6                           | 4.9                     | 0.6               | 0.0      |
| Karelia              | 2000-2014       | 4,439              | 0.0              | 0.0     | 1.5   | 4,374             | 2.7  | 0.3   | 4,245             | 56.2                           | 5.2                     | 0.6               | 0.9      |
| Omsk                 | 2000-2014       | 6,855              | 0.0              | 0.0     | 0.0   | 6,853             | 0.0  | 0.0   | 6,850             | 96.4                           | 10.0                    | 2.8               | 1.9      |
| Samara               | 2000-2014       | 19,767             | 0.0              | 0.0     | 0.0   | 19,757            | 1.0  | 0.2   | 19,513            | 60.6                           | 5.8                     | 1.7               | 0.0      |
| Tomsk                | 2005-2014       | 4,159              | 0.0              | 0.1     | 0.0   | 4,155             | 0.0  | 14.6  | 3,547             | 67.1                           | 0.3                     | 1.7               | 0.0      |
| Slovakia *           | 2000-2010       | 26,502             | 0.0              | 0.1     | 0.2   | 26,420            | 13.1 | 0.0   | 22,971            | 87.1                           | 14.7                    | 0.0               | 0.0      |
| Slovenia *           | 2000-2013       | 16,678             | 0.0              | 0.0     | 0.9   | 16,529            | 2.9  | 0.0   | 16,051            | 92.5                           | 0.3                     | 0.2               | 0.0      |
| Spanish registries   | 2000-2013       | 55,929             | 0.1              | 0.0     | 0.4   | 55,658            | 2.5  | 0.0   | 54,237            | 87.4                           | 3.3                     | 0.4               | 0.0      |
| Basque Country       | 2000-2013       | 18,181             | 0.0              | 0.0     | 0.3   | 18,130            | 1.5  | 0.0   | 17,856            | 87.8                           | 0.7                     | 0.2               | 0.0      |
| Canaries             | 2000-2011       | 8,050              | 0.0              | 0.0     | 0.4   | 8,014             | 2.5  | 0.0   | 7,816             | 87.7                           | 2.1                     | 0.8               | 0.0      |
| Girona               | 2000-2013       | 5,113              | 0.4              | 0.1     | 1.5   | 5,008             | 3.6  | 0.0   | 4,830             | 89.4                           | 11.6                    | 1.0               | 0.0      |
| Granada              | 2000-2012       | 4,842              | 0.0              | 0.0     | 0.3   | 4,826             | 3.4  | 0.0   | 4,660             | 75.8                           | 0.6                     | 0.6               | 0.0      |
| Mallorca             | 2000-2012       | 5,429              | 0.4              | 0.1     | 0.3   | 5,389             | 3.4  | 0.0   | 5,204             | 90.6                           | 1.5                     | 0.7               | 0.0      |
| Murcia               | 2000-2010       | 6,314              | 0.0              | 0.0     | 0.1   | 6,306             | 3.0  | 0.1   | 6,115             | 88.5                           | 12.3                    | 0.0               | 0.0      |
| Navarra              | 2000-2010       | 3,580              | 0.0              | 0.0     | 0.0   | 3,579             | 1.9  | 0.0   | 3,510             | 89.8                           | 1.1                     | 0.1               | 0.0      |
| Tarragona            | 2000-2011       | 4,420              | 0.2              | 0.1     | 0.0   | 4,406             | 3.6  | 0.0   | 4,246             | 88.3                           | 0.7                     | 0.0               | 0.0      |
| Spain Childhood      | -               | -                  | -                | -       | -     | -                 | -    | -     | -                 | -                              | -                       | -                 | -        |
| Valencia Childhood   | -               | -                  | -                | -       | -     | -                 | -    | -     | -                 | -                              | -                       | -                 | -        |
| Sweden *             | 2000-2014       | 53,149             | 0.0              | 0.1     | 0.9   | 52,619            | 2.8  | 0.0   | 51,122            | 96.1                           | 5.3                     | 0.1               | 0.0      |
| Swiss registries     | 2000-2014       | 27,906             | 0.0              | 0.1     | 0.5   | 27,744            | 1.6  | 0.7   | 27,116            | 92.8                           | 4.5                     | 1.6               | 1.4      |
| Basel                | 2000-2011       | 1,862              | 0.0              | 0.0     | 0.8   | 1,847             | 0.6  | 8.0   | 1,689             | 100.0                          | 0.1                     | 0.5               | 3.1      |
| Fribourg             | 2006-2014       | 1,233              | 0.0              | 0.2     | 0.6   | 1,224             | 0.0  | 3.0   | 1,187             | 95.2                           | 5.1                     | 1.7               | 0.0      |
| Geneva               | 2000-2013       | 3,292              | 0.0              | 0.2     | 0.5   | 3,268             | 1.6  | 0.0   | 3,217             | 90.8                           | 9.6                     | 1.9               | 0.0      |
| Graubünden-Glarus    | 2000-2014       | 1,817              | 0.0              | 0.0     | 0.3   | 1,811             | 0.4  | 0.0   | 1,804             | 90.4                           | 0.1                     | 10.5              | 0.0      |
| Neuchâtel            | 2000-2014       | 1,650              | 0.0              | 0.1     | 1.9   | 1,617             | 0.9  | 0.0   | 1,603             | 90.6                           | 1.9                     | 1.1               | 1.3      |
| St Gallen-Appenzell  | 2000-2014       | 3,651              | 0.0              | 0.0     | 0.6   | 3,629             | 0.4  | 0.0   | 3,616             | 91.7                           | 0.0                     | 0.9               | 0.0      |
| Ticino               | 2000-2014       | 3,190              | 0.0              | 0.0     | 0.1   | 3,186             | 2.4  | 0.0   | 3,111             | 93.5                           | 6.9                     | 1.0               | 0.0      |
| Valais               | 2000-2014       | 2,476              | 0.0              | 0.1     | 0.0   | 2,472             | 0.6  | 0.0   | 2,458             | 90.8                           | 0.2                     | 0.8               | 0.0      |

Web-table 2.7: Data quality indicators, patients diagnosed during 2000-2014, by continent, country and registry: LUNG

|                              | Calendar period | Patients submitted | Ineligible (%) ¶ |            |            | Eligible patients | Excluded (%) ¶¶ |            | Patients included | Data quality indicators (%) †† |                         |                   |            |
|------------------------------|-----------------|--------------------|------------------|------------|------------|-------------------|-----------------|------------|-------------------|--------------------------------|-------------------------|-------------------|------------|
|                              |                 |                    | Incomplete dates | In situ    | Other      |                   | DCO             | Other      |                   | MV                             | Non-specific morphology | Lost to follow-up | Censored   |
| Zürich                       | 2000-2013       | 8,735              | 0.0              | 0.0        | 0.5        | 8,690             | 3.0             | 0.0        | 8,431             | 93.4                           | 6.9                     | 0.5               | 3.7        |
| Switzerland (Childhood) †    | -               | -                  |                  |            |            |                   |                 |            |                   |                                |                         |                   |            |
| United Kingdom *             | 2000-2014       | 627,102            | 0.1              | 0.1        | 0.4        | 623,070           | 2.9             | 0.0        | 605,055           | 88.7                           | 8.5                     | 0.4               | 0.0        |
| England                      | 2000-2014       | 503,167            | 0.1              | 0.1        | 0.3        | 500,365           | 3.0             | 0.0        | 484,971           | 91.5                           | 8.9                     | 0.5               | 0.0        |
| Northern Ireland             | 2000-2014       | 15,611             | 0.0              | 0.1        | 1.9        | 15,304            | 1.6             | 0.1        | 15,049            | 70.8                           | 33.7                    | 0.0               | 0.0        |
| Scotland                     | 2000-2014       | 73,710             | 0.0              | 0.1        | 0.8        | 73,025            | 0.8             | 0.0        | 72,421            | 70.7                           | 0.6                     | 0.0               | 0.0        |
| Wales                        | 2000-2014       | 34,614             | 0.0              | 0.0        | 0.6        | 34,376            | 5.1             | 0.0        | 32,614            | 94.1                           | 7.3                     | 0.0               | 0.0        |
| <b>OCEANIA</b>               |                 | <b>169,279</b>     | <b>0.3</b>       | <b>0.1</b> | <b>0.2</b> | <b>168,214</b>    | <b>3.5</b>      | <b>0.0</b> | <b>162,266</b>    | <b>90.3</b>                    | <b>9.4</b>              | <b>0.0</b>        | <b>0.0</b> |
| Australia *                  | 2000-2014       | 141,337            | 0.4              | 0.1        | 0.3        | 140,272           | 2.8             | 0.0        | 136,318           | 91.6                           | 7.7                     | 0.0               | 0.0        |
| Australian Capital Territory | 2000-2013       | 1,296              | 0.0              | 0.1        | 1.1        | 1,281             | 2.0             | 0.3        | 1,251             | 97.8                           | 2.4                     | 0.0               | 0.1        |
| New South Wales              | 2000-2012       | 41,904             | 0.2              | 0.0        | 0.4        | 41,666            | 2.8             | 0.0        | 40,466            | 96.2                           | 4.6                     | 0.0               | 0.0        |
| Northern Territory           | 2000-2013       | 903                | 0.0              | 0.0        | 0.0        | 903               | 0.4             | 0.0        | 899               | 89.9                           | 1.0                     | 0.0               | 0.0        |
| Queensland                   | 2000-2014       | 31,727             | 1.4              | 0.2        | 0.7        | 31,006            | 3.1             | 0.0        | 30,036            | 96.4                           | 4.3                     | 0.0               | 0.0        |
| South Australia              | 2000-2013       | 11,126             | 0.0              | 0.0        | 0.0        | 11,117            | 0.2             | 0.0        | 11,097            | 83.0                           | 1.4                     | 0.0               | 0.0        |
| Tasmania                     | 2000-2013       | 4,055              | 0.0              | 0.2        | 0.5        | 4,024             | 1.8             | 0.0        | 3,951             | 83.8                           | 17.8                    | 0.0               | 0.0        |
| Victoria                     | 2000-2014       | 36,299             | 0.0              | 0.1        | 0.0        | 36,248            | 4.2             | 0.1        | 34,708            | 85.6                           | 14.9                    | 0.0               | 0.0        |
| Western Australia            | 2000-2014       | 14,027             | 0.0              | 0.0        | 0.0        | 14,027            | 0.8             | 0.0        | 13,910            | 91.5                           | 8.9                     | 0.0               | 0.0        |
| New Zealand *                | 2000-2014       | 27,942             | 0.0              | 0.0        | 0.0        | 27,942            | 7.1             | 0.0        | 25,948            | 83.4                           | 18.7                    | 0.0               | 0.0        |
| <b>Total</b>                 |                 | <b>6,417,147</b>   | <b>0.3</b>       | <b>0.1</b> | <b>0.5</b> | <b>6,358,806</b>  | <b>4.7</b>      | <b>0.1</b> | <b>6,051,262</b>  | <b>89.6</b>                    | <b>8.8</b>              | <b>0.3</b>        | <b>0.4</b> |

Web-table 2.8: Data quality indicators, patients diagnosed during 2000-2014, by continent, country and registry: MELANOMA OF THE SKIN

Back

|                                    | Calendar period | Patients submitted | Ineligible (%) ¶ |             |            | Eligible patients | Excluded (%) ¶¶ |            | Patients included | Data quality indicators (%) †† |                         |                   |             |
|------------------------------------|-----------------|--------------------|------------------|-------------|------------|-------------------|-----------------|------------|-------------------|--------------------------------|-------------------------|-------------------|-------------|
|                                    |                 |                    | Incomplete dates | In situ     | Other      |                   | DCO             | Other      |                   | MV                             | Non-specific morphology | Lost to follow-up | Censored    |
| <b>AFRICA</b>                      |                 | <b>498</b>         | <b>9.6</b>       | <b>0.0</b>  | <b>9.2</b> | <b>404</b>        | <b>0.0</b>      | <b>8.9</b> | <b>368</b>        | <b>100.0</b>                   | <b>0.0</b>              | <b>3.0</b>        | <b>54.1</b> |
| Algerian registries                | 2000-2014       | 331                | 13.3             | 0.0         | 0.9        | 284               | 0.0             | 12.7       | 248               | 100.0                          | 0.0                     | 0.0               | 47.6        |
| Annaba                             | 2000-2014       | 41                 | 7.3              | 0.0         | 4.9        | 36                | 0.0             | 0.0        | 36                | 100.0                          | 0.0                     | 0.0               | 91.7        |
| Sétif                              | 2000-2013       | 290                | 14.1             | 0.0         | 0.3        | 248               | 0.0             | 14.5       | 212               | 100.0                          | 0.0                     | 0.0               | 40.1        |
| Tlemcen                            | -               | -                  | -                | -           | -          | -                 | -               | -          | -                 | -                              | -                       | -                 | -           |
| Mali (Bamako)                      | -               | -                  | -                | -           | -          | -                 | -               | -          | -                 | -                              | -                       | -                 | -           |
| Mauritius *                        | 2010-2012       | 5                  | 0.0              | 0.0         | 20.0       | 4                 | 0.0             | 0.0        | 4                 | 100.0                          | 0.0                     | 0.0               | 0.0         |
| Morocco (Casablanca)               | -               | -                  | -                | -           | -          | -                 | -               | -          | -                 | -                              | -                       | -                 | -           |
| Nigeria (Ibadan)                   | 2005-2014       | 87                 | 4.6              | 0.0         | 16.1       | 69                | 0.0             | 0.0        | 69                | 100.0                          | 0.0                     | 0.0               | 87.0        |
| South Africa (Eastern Cape)        | 2000-2014       | 75                 | 0.0              | 0.0         | 37.3       | 47                | 0.0             | 0.0        | 47                | 100.0                          | 0.0                     | 23.4              | 44.7        |
| <b>AMERICA (Central and South)</b> |                 | <b>10,336</b>      | <b>3.3</b>       | <b>10.9</b> | <b>5.0</b> | <b>8,349</b>      | <b>1.5</b>      | <b>0.3</b> | <b>8,202</b>      | <b>100.0</b>                   | <b>0.0</b>              | <b>0.5</b>        | <b>6.6</b>  |
| Argentinian registries             | 2002-2013       | 1,196              | 4.7              | 0.8         | 3.3        | 1,092             | 0.7             | 0.0        | 1,084             | 100.0                          | 0.0                     | 0.0               | 0.0         |
| Chubut                             | 2008-2012       | 74                 | 75.7             | 1.4         | 2.7        | 15                | 0.0             | 0.0        | 15                | 100.0                          | 0.0                     | 0.0               | 0.0         |
| Córdoba                            | 2004-2012       | 474                | 0.0              | 1.7         | 1.3        | 460               | 1.1             | 0.0        | 455               | 100.0                          | 0.0                     | 0.0               | 0.0         |
| Mendoza                            | 2003-2013       | 648                | 0.0              | 0.0         | 4.8        | 617               | 0.5             | 0.0        | 614               | 100.0                          | 0.0                     | 0.0               | 0.0         |
| Tierra del Fuego                   | -               | -                  | -                | -           | -          | -                 | -               | -          | -                 | -                              | -                       | -                 | -           |
| Argentina (Childhood) †            | -               | -                  | -                | -           | -          | -                 | -               | -          | -                 | -                              | -                       | -                 | -           |
| Brazilian registries               | 2000-2014       | 1,895              | 0.8              | 14.5        | 5.1        | 1,508             | 5.6             | 0.0        | 1,424             | 100.0                          | 0.0                     | 0.0               | 0.0         |
| Aracaju                            | 2000-2012       | 260                | 4.6              | 9.6         | 3.5        | 214               | 1.4             | 0.0        | 211               | 100.0                          | 0.0                     | 0.0               | 0.0         |
| Cuiabá                             | -               | -                  | -                | -           | -          | -                 | -               | -          | -                 | -                              | -                       | -                 | -           |
| Curitiba                           | 2000-2012       | 1,448              | 0.0              | 13.8        | 4.8        | 1,179             | 6.8             | 0.0        | 1,099             | 100.0                          | 0.0                     | 0.0               | 0.0         |
| Goiânia                            | -               | -                  | -                | -           | -          | -                 | -               | -          | -                 | -                              | -                       | -                 | -           |
| Juá                                | 2000-2014       | 187                | 1.6              | 26.7        | 10.2       | 115               | 0.9             | 0.0        | 114               | 100.0                          | 0.0                     | 0.0               | 0.0         |
| São Paulo                          | -               | -                  | -                | -           | -          | -                 | -               | -          | -                 | -                              | -                       | -                 | -           |
| Chilean registries                 | 2000-2012       | 569                | 0.0              | 0.0         | 2.5        | 555               | 0.2             | 0.0        | 554               | 100.0                          | 0.0                     | 0.0               | 19.3        |
| Antofagasta                        | 2003-2010       | 101                | 0.0              | 0.0         | 4.0        | 97                | 1.0             | 0.0        | 96                | 100.0                          | 0.0                     | 0.0               | 11.5        |
| Biobio                             | 2003-2012       | 117                | 0.0              | 0.0         | 0.0        | 117               | 0.0             | 0.0        | 117               | 100.0                          | 0.0                     | 0.0               | 17.1        |
| Concepción                         | 2006-2010       | 184                | 0.0              | 0.0         | 1.1        | 182               | 0.0             | 0.0        | 182               | 100.0                          | 0.0                     | 0.0               | 26.4        |
| Los Rios                           | 2000-2012       | 167                | 0.0              | 0.0         | 4.8        | 159               | 0.0             | 0.0        | 159               | 100.0                          | 0.0                     | 0.0               | 17.6        |
| Colombian registries               | 2000-2014       | 1,698              | 3.8              | 5.2         | 10.0       | 1,376             | 0.2             | 0.0        | 1,373             | 100.0                          | 0.0                     | 0.0               | 25.0        |
| Bucaramanga                        | 2003-2013       | 319                | 0.3              | 16.3        | 13.5       | 223               | 0.9             | 0.0        | 221               | 100.0                          | 0.0                     | 0.0               | 0.0         |
| Cali                               | 2000-2014       | 1,061              | 2.5              | 0.0         | 10.9       | 918               | 0.1             | 0.0        | 917               | 100.0                          | 0.0                     | 0.0               | 33.3        |
| Manizales                          | 2003-2012       | 126                | 16.7             | 0.0         | 1.6        | 103               | 0.0             | 0.0        | 103               | 100.0                          | 0.0                     | 0.0               | 36.9        |
| Pasto                              | 2000-2012       | 192                | 8.3              | 18.8        | 4.2        | 132               | 0.0             | 0.0        | 132               | 100.0                          | 0.0                     | 0.0               | 0.0         |
| Costa Rica *                       | 2002-2014       | 1,448              | 0.0              | 0.0         | 0.8        | 1,436             | 0.0             | 0.3        | 1,432             | 100.0                          | 0.0                     | 0.0               | 0.0         |
| Cuba *                             | -               | -                  | -                | -           | -          | -                 | -               | -          | -                 | -                              | -                       | -                 | -           |
| Ecuadorian registries              | 2000-2013       | 1,483              | 11.2             | 8.4         | 6.5        | 1,096             | 0.4             | 1.1        | 1,080             | 100.0                          | 0.0                     | 0.2               | 5.3         |
| Cuenca                             | 2002-2012       | 161                | 44.1             | 3.7         | 3.1        | 79                | 0.0             | 0.0        | 79                | 100.0                          | 0.0                     | 0.0               | 49.4        |
| Guayaquil                          | 2005-2013       | 247                | 0.4              | 5.7         | 6.5        | 216               | 0.0             | 5.6        | 204               | 100.0                          | 0.0                     | 0.0               | 0.0         |
| Loja                               | 2000-2013       | 89                 | 0.0              | 6.7         | 9.0        | 75                | 0.0             | 0.0        | 75                | 100.0                          | 0.0                     | 2.7               | 0.0         |
| Manabí                             | 2000-2013       | 105                | 3.8              | 3.8         | 10.5       | 86                | 0.0             | 0.0        | 86                | 100.0                          | 0.0                     | 0.0               | 0.0         |
| Quito                              | 2000-2013       | 881                | 10.2             | 10.8        | 6.4        | 640               | 0.6             | 0.0        | 636               | 100.0                          | 0.0                     | 0.0               | 2.8         |
| Guadeloupe *                       | 2008-2013       | 60                 | 0.0              | 13.3        | 0.0        | 52                | 0.0             | 0.0        | 52                | 100.0                          | 0.0                     | 0.0               | 71.2        |
| Martinique *                       | 2000-2012       | 177                | 0.0              | 0.0         | 2.8        | 172               | 0.0             | 4.7        | 164               | 100.0                          | 0.0                     | 25.0              | 0.0         |
| Mexico (Childhood) †               | -               | -                  | -                | -           | -          | -                 | -               | -          | -                 | -                              | -                       | -                 | -           |
| Peru (Lima)                        | -               | -                  | -                | -           | -          | -                 | -               | -          | -                 | -                              | -                       | -                 | -           |
| Puerto Rico *                      | 2000-2011       | 1,810              | 2.2              | 34.6        | 4.5        | 1,062             | 2.2             | 0.0        | 1,039             | 100.0                          | 0.0                     | 0.0               | 0.0         |
| Uruguay *                          | -               | -                  | -                | -           | -          | -                 | -               | -          | -                 | -                              | -                       | -                 | -           |
| <b>AMERICA (North)</b>             |                 | <b>1,094,651</b>   | <b>0.5</b>       | <b>34.5</b> | <b>2.7</b> | <b>681,242</b>    | <b>0.4</b>      | <b>0.0</b> | <b>678,206</b>    | <b>100.0</b>                   | <b>0.0</b>              | <b>2.5</b>        | <b>0.0</b>  |
| Canadian registries                | 2000-2014       | 83,202             | 0.1              | 17.2        | 4.1        | 65,339            | 0.2             | 0.0        | 65,235            | 100.0                          | 0.0                     | 0.0               | 0.0         |
| Alberta                            | 2000-2014       | 11,264             | 0.2              | 32.4        | 4.2        | 7,119             | 0.0             | 0.0        | 7,116             | 100.0                          | 0.0                     | 0.0               | 0.0         |
| British Columbia                   | 2000-2014       | 18,633             | 0.4              | 30.2        | 4.4        | 12,115            | 0.2             | 0.0        | 12,095            | 100.0                          | 0.0                     | 0.0               | 0.0         |
| Manitoba                           | 2000-2014       | 3,634              | 0.0              | 32.1        | 4.7        | 2,294             | 0.0             | 0.0        | 2,293             | 100.0                          | 0.0                     | 0.0               | 0.0         |
| New Brunswick                      | 2000-2014       | 3,118              | 0.0              | 30.7        | 3.1        | 2,063             | 0.0             | 0.0        | 2,063             | 100.0                          | 0.0                     | 0.0               | 0.0         |
| Newfoundland & Labrador            | 2000-2014       | 1,765              | 0.1              | 29.6        | 6.1        | 1,134             | 0.0             | 0.0        | 1,134             | 100.0                          | 0.0                     | 0.0               | 0.0         |
| Nova Scotia                        | 2000-2014       | 5,127              | 0.3              | 30.0        | 3.5        | 3,395             | 0.1             | 0.0        | 3,390             | 100.0                          | 0.0                     | 0.0               | 0.0         |
| Ontario                            | 2000-2014       | 36,183             | 0.0              | 0.0         | 4.0        | 34,725            | 0.2             | 0.0        | 34,652            | 100.0                          | 0.0                     | 0.0               | 0.0         |
| Prince Edward Island               | 2000-2014       | 714                | 0.0              | 26.3        | 0.1        | 525               | 0.0             | 0.0        | 525               | 100.0                          | 0.0                     | 0.0               | 0.0         |
| Saskatchewan                       | 2000-2014       | 2,764              | 0.0              | 23.5        | 5.2        | 1,969             | 0.1             | 0.0        | 1,967             | 100.0                          | 0.0                     | 0.0               | 0.0         |
| US registries                      | 2000-2014       | 1,011,449          | 0.6              | 35.9        | 2.6        | 615,903           | 0.5             | 0.0        | 612,971           | 100.0                          | 0.0                     | 2.8               | 0.0         |
| Alabama                            | 2000-2014       | 23,564             | 0.9              | 41.3        | 2.3        | 13,084            | 0.6             | 0.0        | 13,012            | 100.0                          | 0.0                     | 0.0               | 0.0         |
| Alaska                             | 2000-2013       | 1,533              | 4.4              | 30.6        | 3.5        | 944               | 0.4             | 0.0        | 940               | 100.0                          | 0.0                     | 0.0               | 0.0         |
| Arkansas                           | 2000-2011       | 7,592              | 0.3              | 31.9        | 3.3        | 4,897             | 0.3             | 0.0        | 4,879             | 100.0                          | 0.0                     | 0.0               | 0.0         |
| California                         | 2000-2011       | 127,043            | 1.1              | 36.9        | 2.3        | 75,851            | 0.2             | 0.0        | 75,712            | 100.0                          | 0.0                     | 0.0               | 0.0         |
| Greater Bay Area                   | 2000-2014       | 33,806             | 0.5              | 40.4        | 2.3        | 19,183            | 0.2             | 0.0        | 19,151            | 100.0                          | 0.0                     | 12.8              | 0.0         |
| Greater California                 | 2000-2014       | 105,540            | 1.0              | 38.1        | 2.1        | 62,007            | 0.2             | 0.0        | 61,882            | 100.0                          | 0.0                     | 13.8              | 0.0         |
| Los Angeles                        | 2000-2014       | 28,952             | 1.4              | 35.6        | 2.9        | 17,385            | 0.1             | 0.0        | 17,358            | 100.0                          | 0.0                     | 19.6              | 0.0         |
| Colorado                           | 2000-2013       | 21,135             | 0.3              | 33.1        | 3.1        | 13,427            | 0.7             | 0.0        | 13,338            | 100.0                          | 0.0                     | 0.0               | 0.0         |
| Connecticut                        | 2000-2014       | 21,602             | 0.4              | 40.9        | 2.2        | 12,211            | 0.2             | 0.0        | 12,185            | 100.0                          | 0.0                     | 5.5               | 0.0         |
| Delaware                           | 2000-2014       | 6,283              | 0.2              | 44.0        | 1.4        | 3,413             | 0.2             | 0.0        | 3,406             | 100.0                          | 0.0                     | 0.0               | 0.0         |
| Florida                            | 2000-2013       | 89,847             | 0.1              | 35.4        | 2.7        | 55,590            | 0.7             | 0.1        | 55,134            | 100.0                          | 0.0                     | 0.0               | 0.0         |
| Georgia                            | 2000-2014       | 43,981             | 0.0              | 35.6        | 2.0        | 27,451            | 0.4             | 0.0        | 27,350            | 100.0                          | 0.0                     | 0.0               | 0.0         |
| Atlanta                            | 2000-2014       | 15,722             | 0.0              | 36.8        | 1.5        | 9,697             | 0.2             | 0.0        | 9,675             | 100.0                          | 0.0                     | 0.0               | 0.0         |
| Hawaii                             | 2000-2014       | 5,753              | 0.3              | 33.7        | 1.5        | 3,710             | 0.2             | 0.0        | 3,704             | 100.0                          | 0.0                     | 7.5               | 0.0         |
| Idaho                              | 2000-2014       | 9,032              | 0.6              | 40.8        | 2.2        | 5,095             | 0.7             | 0.0        | 5,059             | 100.0                          | 0.0                     | 0.0               | 0.0         |
| Indiana                            | 2000-2014       | 25,599             | 0.6              | 32.3        | 3.3        | 16,347            | 0.5             | 0.0        | 16,269            | 100.0                          | 0.0                     | 0.0               | 0.0         |
| Iowa                               | 2000-2014       | 15,612             | 0.6              | 32.6        | 3.7        | 9,846             | 0.2             | 0.0        | 9,822             | 100.0                          | 0.0                     | 2.8               | 0.0         |
| Kentucky                           | 2000-2014       | 23,097             | 0.0              | 33.3        | 2.8        | 14,764            | 0.2             | 0.0        | 14,729            | 100.0                          | 0.0                     | 6.4               | 0.0         |
| Louisiana                          | 2000-2014       | 15,105             | 0.5              | 37.1        | 2.8        | 9,000             | 0.2             | 0.0        | 8,982             | 100.0                          | 0.0                     | 6.4               | 0.1         |
| Maine                              | 2000-2013       | 7,860              | 0.3              | 38.4        | 3.0        | 4,581             | 0.3             | 0.0        | 4,565             | 100.0                          | 0.0                     | 0.0               | 0.0         |
| Massachusetts                      | 2000-2009       | 23,194             | 0.0              | 34.5        | 3.0        | 14,483            | 0.4             | 0.0        | 14,420            | 100.0                          | 0.0                     | 0.0               | 0.0         |
| Michigan                           | 2000-2013       | 41,986             | 0.2              | 36.5        | 2.5        | 25,505            | 0.6             | 0.0        | 25,335            | 100.0                          | 0.0                     | 0.0               | 0.0         |

Web-table 2.8: Data quality indicators, patients diagnosed during 2000-2014, by continent, country and registry: MELANOMA OF THE SKIN

|                     | Calendar period | Patients submitted | Ineligible (%) ¶ |             |            | Eligible patients | Excluded (%) ¶¶ |            | Patients included | Data quality indicators (%) ¶¶ |                         |                   |            |
|---------------------|-----------------|--------------------|------------------|-------------|------------|-------------------|-----------------|------------|-------------------|--------------------------------|-------------------------|-------------------|------------|
|                     |                 |                    | Incomplete dates | In situ     | Other      |                   | DCO             | Other      |                   | MV                             | Non-specific morphology | Lost to follow-up | Censored   |
| Detroit             | 2000-2014       | 16,962             | 0.3              | 41.2        | 2.4        | 9,514             | 0.2             | 0.0        | 9,495             | 100.0                          | 0.0                     | 8.7               | 0.1        |
| Minnesota           | 2000-2013       | 27,449             | 0.0              | 38.1        | 1.9        | 16,472            | 0.3             | 0.0        | 16,421            | 100.0                          | 0.0                     | 0.0               | 0.0        |
| Mississippi         | 2002-2014       | 9,214              | 0.8              | 31.6        | 2.8        | 5,968             | 0.6             | 0.0        | 5,931             | 100.0                          | 0.0                     | 0.0               | 0.0        |
| Missouri            | -               | -                  | -                | -           | -          | -                 | -               | -          | -                 | -                              | -                       | -                 | -          |
| Montana             | 2000-2014       | 5,595              | 0.6              | 37.8        | 2.9        | 3,289             | 0.5             | 0.0        | 3,272             | 100.0                          | 0.0                     | 0.0               | 0.0        |
| Nebraska            | 2000-2014       | 7,894              | 0.6              | 33.4        | 3.5        | 4,930             | 0.5             | 0.0        | 4,906             | 100.0                          | 0.0                     | 0.0               | 0.0        |
| New Hampshire       | 2000-2014       | 9,727              | 0.1              | 40.3        | 2.3        | 5,575             | 0.3             | 0.0        | 5,560             | 100.0                          | 0.0                     | 0.0               | 0.0        |
| New Jersey          | 2000-2014       | 49,568             | 0.8              | 42.7        | 1.9        | 27,024            | 0.4             | 0.0        | 26,910            | 100.0                          | 0.0                     | 48.2              | 0.0        |
| New Mexico          | 2000-2014       | 8,720              | 0.0              | 40.1        | 2.2        | 5,030             | 0.6             | 0.0        | 5,000             | 100.0                          | 0.0                     | 8.7               | 0.4        |
| New York            | -               | -                  | -                | -           | -          | -                 | -               | -          | -                 | -                              | -                       | -                 | -          |
| New York City       | -               | -                  | -                | -           | -          | -                 | -               | -          | -                 | -                              | -                       | -                 | -          |
| North Carolina      | 2000-2014       | 47,654             | 0.0              | 39.5        | 2.4        | 27,727            | 0.4             | 0.0        | 27,602            | 100.0                          | 0.0                     | 0.0               | 0.0        |
| Ohio                | 2000-2014       | 54,382             | 0.1              | 35.7        | 3.0        | 33,292            | 0.6             | 0.0        | 33,079            | 100.0                          | 0.0                     | 0.0               | 0.0        |
| Oklahoma            | 2000-2010       | 9,135              | 0.4              | 24.8        | 3.9        | 6,479             | 1.1             | 0.0        | 6,407             | 100.0                          | 0.0                     | 0.0               | 0.0        |
| Oregon              | 2000-2013       | 24,301             | 0.1              | 40.9        | 2.6        | 13,703            | 0.5             | 0.0        | 13,637            | 100.0                          | 0.0                     | 0.0               | 0.0        |
| Pennsylvania        | 2000-2014       | 62,912             | 2.4              | 32.9        | 2.7        | 39,052            | 0.4             | 0.0        | 38,904            | 100.0                          | 0.0                     | 0.0               | 0.0        |
| Rhode Island        | 2000-2014       | 6,363              | 0.4              | 39.0        | 2.4        | 3,703             | 0.4             | 0.0        | 3,688             | 100.0                          | 0.0                     | 0.0               | 0.0        |
| South Carolina      | 2000-2014       | 24,940             | 0.0              | 40.8        | 1.8        | 14,309            | 0.5             | 0.0        | 14,230            | 100.0                          | 0.0                     | 0.0               | 0.0        |
| Tennessee           | 2000-2011       | 19,264             | 0.5              | 28.5        | 3.3        | 13,047            | 0.3             | 0.0        | 13,003            | 100.0                          | 0.0                     | 0.0               | 0.0        |
| Texas               | 2000-2013       | 59,374             | 0.9              | 28.4        | 3.5        | 39,862            | 0.8             | 0.0        | 39,555            | 100.0                          | 0.0                     | 0.0               | 0.0        |
| Utah                | 2000-2014       | 15,097             | 0.1              | 38.8        | 2.0        | 8,916             | 0.1             | 0.0        | 8,908             | 100.0                          | 0.0                     | 10.0              | 0.2        |
| Vermont             | 2000-2013       | 4,537              | 0.1              | 38.8        | 1.9        | 2,688             | 0.3             | 0.0        | 2,679             | 100.0                          | 0.0                     | 0.0               | 0.0        |
| Washington          | 2000-2008       | 22,317             | 0.8              | 39.2        | 2.2        | 12,876            | 0.2             | 0.0        | 12,843            | 100.0                          | 0.0                     | 0.0               | 0.0        |
| Seattle             | 2000-2014       | 31,229             | 0.6              | 43.1        | 2.0        | 16,958            | 0.1             | 0.0        | 16,938            | 100.0                          | 0.0                     | 3.8               | 0.0        |
| West Virginia       | 2000-2014       | 8,894              | 1.3              | 31.1        | 3.4        | 5,707             | 0.4             | 0.0        | 5,682             | 100.0                          | 0.0                     | 0.0               | 0.0        |
| Wisconsin           | 2000-2013       | 21,636             | 0.9              | 28.4        | 3.6        | 14,507            | 1.0             | 0.0        | 14,366            | 100.0                          | 0.0                     | 0.0               | 0.0        |
| Wyoming             | 2000-2013       | 2,658              | 0.2              | 38.6        | 2.9        | 1,548             | 0.1             | 0.0        | 1,547             | 100.0                          | 0.0                     | 0.0               | 0.1        |
| <b>ASIA</b>         |                 | <b>41,686</b>      | <b>0.5</b>       | <b>14.9</b> | <b>8.4</b> | <b>31,741</b>     | <b>1.1</b>      | <b>0.2</b> | <b>31,314</b>     | <b>100.0</b>                   | <b>0.0</b>              | <b>0.4</b>        | <b>2.0</b> |
| Chinese registries  | 2003-2013       | 1,733              | 0.2              | 0.0         | 16.1       | 1,450             | 0.1             | 0.0        | 1,449             | 100.0                          | 0.0                     | 4.8               | 0.2        |
| Beijing             | 2003-2013       | 790                | 0.1              | 0.0         | 20.4       | 628               | 0.0             | 0.0        | 628               | 100.0                          | 0.0                     | 9.2               | 0.3        |
| Changle             | 2003-2013       | 30                 | 0.0              | 0.0         | 3.3        | 29                | 0.0             | 0.0        | 29                | 100.0                          | 0.0                     | 0.0               | 0.0        |
| Cixian              | 2003-2011       | 15                 | 0.0              | 0.0         | 0.0        | 15                | 0.0             | 0.0        | 15                | 100.0                          | 0.0                     | 0.0               | 0.0        |
| Dafeng              | 2003-2013       | 22                 | 0.0              | 0.0         | 9.1        | 20                | 5.0             | 0.0        | 19                | 100.0                          | 0.0                     | 0.0               | 0.0        |
| Dalian              | 2003-2013       | 249                | 0.0              | 0.0         | 18.5       | 203               | 0.0             | 0.0        | 203               | 100.0                          | 0.0                     | 0.0               | 0.0        |
| Donghai             | 2006-2013       | 13                 | 0.0              | 0.0         | 7.7        | 12                | 0.0             | 0.0        | 12                | 100.0                          | 0.0                     | 16.7              | 0.0        |
| Feicheng            | 2005-2013       | 13                 | 0.0              | 0.0         | 23.1       | 10                | 0.0             | 0.0        | 10                | 100.0                          | 0.0                     | 0.0               | 0.0        |
| Ganyu               | 2003-2012       | 29                 | 0.0              | 0.0         | 0.0        | 29                | 0.0             | 0.0        | 29                | 100.0                          | 0.0                     | 3.4               | 0.0        |
| Guanyun             | 2005-2013       | 22                 | 0.0              | 0.0         | 0.0        | 22                | 0.0             | 0.0        | 22                | 100.0                          | 0.0                     | 0.0               | 0.0        |
| Haimen              | 2003-2013       | 101                | 0.0              | 0.0         | 15.8       | 85                | 0.0             | 0.0        | 85                | 100.0                          | 0.0                     | 0.0               | 0.0        |
| Haining             | 2003-2013       | 48                 | 0.0              | 0.0         | 8.3        | 44                | 0.0             | 0.0        | 44                | 100.0                          | 0.0                     | 2.3               | 0.0        |
| Jianhu              | 2003-2013       | 32                 | 0.0              | 0.0         | 0.0        | 32                | 0.0             | 0.0        | 32                | 100.0                          | 0.0                     | 6.3               | 0.0        |
| Jiashan             | 2003-2013       | 45                 | 0.0              | 0.0         | 13.3       | 39                | 0.0             | 0.0        | 39                | 100.0                          | 0.0                     | 0.0               | 0.0        |
| Jintan              | 2003-2013       | 29                 | 0.0              | 0.0         | 0.0        | 29                | 0.0             | 0.0        | 29                | 100.0                          | 0.0                     | 0.0               | 0.0        |
| Lianyungang         | 2008-2013       | 25                 | 4.0              | 0.0         | 0.0        | 24                | 0.0             | 0.0        | 24                | 100.0                          | 0.0                     | 25.0              | 0.0        |
| Linzhou             | 2003-2013       | 49                 | 0.0              | 0.0         | 10.2       | 44                | 0.0             | 0.0        | 44                | 100.0                          | 0.0                     | 0.0               | 0.0        |
| Qidong              | 2003-2013       | 62                 | 0.0              | 0.0         | 3.2        | 60                | 0.0             | 0.0        | 60                | 100.0                          | 0.0                     | 0.0               | 0.0        |
| Sihui               | 2003-2013       | 25                 | 4.0              | 0.0         | 12.0       | 21                | 0.0             | 0.0        | 21                | 100.0                          | 0.0                     | 0.0               | 4.8        |
| Taixing             | 2008-2013       | 18                 | 5.6              | 0.0         | 0.0        | 17                | 0.0             | 0.0        | 17                | 100.0                          | 0.0                     | 0.0               | 0.0        |
| Yangzhong           | 2003-2013       | 27                 | 0.0              | 0.0         | 0.0        | 27                | 0.0             | 0.0        | 27                | 100.0                          | 0.0                     | 0.0               | 0.0        |
| Zhongshan           | 2003-2013       | 89                 | 0.0              | 0.0         | 32.6       | 60                | 0.0             | 0.0        | 60                | 100.0                          | 0.0                     | 0.0               | 0.0        |
| Cyprus *            | 2004-2014       | 687                | 3.6              | 3.1         | 6.1        | 599               | 1.7             | 0.0        | 589               | 100.0                          | 0.0                     | 0.0               | 53.7       |
| Hong Kong *         | -               | -                  | -                | -           | -          | -                 | -               | -          | -                 | -                              | -                       | -                 | -          |
| Indian registries   | 2000-2014       | 29                 | 0.0              | 0.0         | 0.0        | 29                | 0.0             | 0.0        | 29                | 100.0                          | 0.0                     | 6.9               | 0.0        |
| Guwahati            | -               | -                  | -                | -           | -          | -                 | -               | -          | -                 | -                              | -                       | -                 | -          |
| Karunagappally      | 2000-2014       | 29                 | 0.0              | 0.0         | 0.0        | 29                | 0.0             | 0.0        | 29                | 100.0                          | 0.0                     | 6.9               | 0.0        |
| Iran (Golestan)     | -               | -                  | -                | -           | -          | -                 | -               | -          | -                 | -                              | -                       | -                 | -          |
| Israel *            | 2000-2013       | 18,303             | 0.0              | 28.3        | 4.2        | 12,348            | 0.7             | 0.0        | 12,265            | 100.0                          | 0.0                     | 0.0               | 0.0        |
| Japanese registries | 2000-2014       | 6,462              | 1.3              | 10.4        | 22.3       | 4,263             | 5.7             | 0.0        | 4,018             | 100.0                          | 0.0                     | 0.0               | 2.4        |
| Aichi               | 2003-2013       | 1,016              | 0.2              | 11.3        | 19.3       | 703               | 4.4             | 0.0        | 672               | 100.0                          | 0.0                     | 0.0               | 4.0        |
| Akita               | 2010-2014       | 113                | 1.8              | 26.5        | 0.9        | 80                | 0.0             | 1.3        | 79                | 100.0                          | 0.0                     | 0.0               | 32.9       |
| Ehime               | 2007-2013       | 213                | 0.5              | 17.8        | 22.5       | 126               | 4.0             | 0.0        | 121               | 100.0                          | 0.0                     | 0.0               | 0.0        |
| Fukui               | 2003-2009       | 75                 | 0.0              | 10.7        | 21.3       | 51                | 7.8             | 0.0        | 47                | 100.0                          | 0.0                     | 0.0               | 4.3        |
| Gunma               | 2003-2012       | 273                | 22.3             | 7.0         | 20.9       | 136               | 10.3            | 0.0        | 122               | 100.0                          | 0.0                     | 0.0               | 4.1        |
| Hiroshima           | 2004-2008       | 156                | 0.0              | 26.3        | 0.0        | 115               | 0.0             | 0.0        | 115               | 100.0                          | 0.0                     | 0.0               | 0.0        |
| Hyogo               | 2007-2012       | 599                | 0.3              | 14.7        | 33.2       | 310               | 6.1             | 0.0        | 291               | 100.0                          | 0.0                     | 0.0               | 1.4        |
| Ibaraki             | 2006-2012       | 319                | 0.9              | 14.7        | 24.1       | 192               | 3.6             | 0.0        | 185               | 100.0                          | 0.0                     | 0.0               | 1.6        |
| Kanagawa            | 2000-2013       | 1,297              | 0.0              | 0.5         | 22.8       | 994               | 8.6             | 0.0        | 909               | 100.0                          | 0.0                     | 0.0               | 0.0        |
| Miyagi              | 2000-2010       | 347                | 2.9              | 15.9        | 1.2        | 278               | 4.0             | 0.0        | 267               | 100.0                          | 0.0                     | 0.0               | 2.2        |
| Niigata             | 2000-2013       | 541                | 0.0              | 8.9         | 23.8       | 364               | 8.2             | 0.0        | 334               | 100.0                          | 0.0                     | 0.0               | 0.0        |
| Osaka               | 2000-2008       | 785                | 0.0              | 8.5         | 29.4       | 487               | 5.1             | 0.0        | 462               | 100.0                          | 0.0                     | 0.0               | 4.5        |
| Saga                | 2006-2013       | 123                | 0.0              | 20.3        | 18.7       | 75                | 4.0             | 0.0        | 72                | 100.0                          | 0.0                     | 0.0               | 0.0        |
| Tochigi             | 2006-2013       | 264                | 0.8              | 14.0        | 25.8       | 157               | 2.5             | 0.0        | 153               | 100.0                          | 0.0                     | 0.0               | 0.7        |
| Yamagata            | 2003-2013       | 267                | 0.0              | 14.6        | 29.6       | 149               | 4.0             | 0.0        | 143               | 100.0                          | 0.0                     | 0.0               | 0.7        |
| Yamanashi           | 2008-2012       | 74                 | 1.4              | 14.9        | 21.6       | 46                | 0.0             | 0.0        | 46                | 100.0                          | 0.0                     | 0.0               | 0.0        |
| Jordan *            | 2000-2014       | 306                | 0.3              | 1.0         | 27.8       | 217               | 0.0             | 1.4        | 214               | 100.0                          | 0.0                     | 14.0              | 0.0        |
| Korea * ‡           | 2000-2014       | 5,824              | 0.9              | 0.0         | 0.0        | 5,771             | 0.0             | 0.0        | 5,771             | 100.0                          | 0.0                     | 0.0               | 0.0        |
| Kuwait *            | 2000-2013       | 21                 | 0.0              | 0.0         | 14.3       | 18                | 0.0             | 0.0        | 18                | 100.0                          | 0.0                     | 0.0               | 0.0        |
| Malaysia (Penang)   | -               | -                  | -                | -           | -          | -                 | -               | -          | -                 | -                              | -                       | -                 | -          |
| Mongolia *          | -               | -                  | -                | -           | -          | -                 | -               | -          | -                 | -                              | -                       | -                 | -          |
| Qatar *             | 2000-2014       | 61                 | 0.0              | 1.6         | 8.2        | 55                | 0.0             | 0.0        | 55                | 100.0                          | 0.0                     | 0.0               | 70.9       |
| Singapore *         | 2000-2014       | 521                | 0.0              | 9.0         | 20.3       | 368               | 0.3             | 0.0        | 367               | 100.0                          | 0.0                     | 0.0               | 0.0        |
| Taiwan *            | 2000-2014       | 3,123              | 0.3              | 3.4         | 0.6        | 2,988             | 0.0             | 0.0        | 2,988             | 100.0                          | 0.0                     | 0.0               | 0.0        |

Web-table 2.8: Data quality indicators, patients diagnosed during 2000-2014, by continent, country and registry: MELANOMA OF THE SKIN

|                                | Calendar period | Patients submitted | Ineligible (%) ¶ |             |            | Excluded (%) ¶¶   |            |            | Data quality indicators (%) †† |              |                         |                   |            |
|--------------------------------|-----------------|--------------------|------------------|-------------|------------|-------------------|------------|------------|--------------------------------|--------------|-------------------------|-------------------|------------|
|                                |                 |                    | Incomplete dates | In situ     | Other      | Eligible patients | DCO        | Other      | Patients included              | MV           | Non-specific morphology | Lost to follow-up | Censored   |
| Thai registries                | 2000-2014       | 817                | 0.0              | 0.0         | 5.9        | 769               | 0.0        | 9.6        | 695                            | 100.0        | 0.0                     | 0.3               | 3.9        |
| Bangkok                        | 2001-2012       | 305                | 0.0              | 0.0         | 8.2        | 280               | 0.0        | 26.4       | 206                            | 100.0        | 0.0                     | 0.0               | 0.0        |
| Khon Kaen                      | 2000-2014       | 168                | 0.0              | 0.0         | 12.5       | 147               | 0.0        | 0.0        | 147                            | 100.0        | 0.0                     | 0.0               | 4.8        |
| Lampang                        | 2000-2014       | 81                 | 0.0              | 0.0         | 0.0        | 81                | 0.0        | 0.0        | 81                             | 100.0        | 0.0                     | 0.0               | 0.0        |
| Lamphun                        | 2000-2014       | 53                 | 0.0              | 0.0         | 0.0        | 53                | 0.0        | 0.0        | 53                             | 100.0        | 0.0                     | 0.0               | 0.0        |
| Lopburi                        | 2000-2014       | 98                 | 0.0              | 0.0         | 1.0        | 97                | 0.0        | 0.0        | 97                             | 100.0        | 0.0                     | 0.0               | 18.6       |
| Songkhla                       | 2000-2014       | 112                | 0.0              | 0.0         | 0.9        | 111               | 0.0        | 0.0        | 111                            | 100.0        | 0.0                     | 1.8               | 1.8        |
| Turkish registries             | 2000-2013       | 3,799              | 1.4              | 4.8         | 18.4       | 2,866             | 0.3        | 0.0        | 2,856                          | 100.0        | 0.0                     | 0.2               | 4.8        |
| Ankara                         | 2008-2012       | 1,263              | 0.0              | 1.9         | 30.0       | 860               | 0.0        | 0.0        | 860                            | 100.0        | 0.0                     | 0.0               | 1.7        |
| Antalya                        | 2006-2012       | 306                | 0.0              | 3.9         | 14.7       | 249               | 0.4        | 0.0        | 248                            | 100.0        | 0.0                     | 0.0               | 1.6        |
| Bursa                          | 2006-2012       | 285                | 6.3              | 0.0         | 0.0        | 267               | 1.9        | 0.0        | 262                            | 100.0        | 0.0                     | 0.0               | 0.0        |
| Edirne                         | 2006-2012       | 69                 | 2.9              | 0.0         | 21.7       | 52                | 0.0        | 0.0        | 52                             | 100.0        | 0.0                     | 0.0               | 0.0        |
| Erzurum                        | 2006-2012       | 82                 | 0.0              | 3.7         | 17.1       | 65                | 0.0        | 0.0        | 65                             | 100.0        | 0.0                     | 0.0               | 1.5        |
| Eskisehir                      | 2010-2010       | 110                | 0.0              | 2.7         | 96.4       | 1                 | 0.0        | 0.0        | 1                              | 100.0        | 0.0                     | 0.0               | 0.0        |
| Izmir                          | 2000-2013       | 1,357              | 2.3              | 9.1         | 9.0        | 1,081             | 0.4        | 0.0        | 1,077                          | 100.0        | 0.0                     | 0.0               | 10.7       |
| Samsun                         | 2006-2012       | 182                | 0.0              | 1.6         | 8.8        | 163               | 0.0        | 0.0        | 163                            | 100.0        | 0.0                     | 3.7               | 0.0        |
| Trabzon                        | 2006-2012       | 145                | 0.7              | 9.7         | 1.4        | 128               | 0.0        | 0.0        | 128                            | 100.0        | 0.0                     | 0.0               | 1.6        |
| <b>EUROPE</b>                  |                 | <b>842,121</b>     | <b>0.1</b>       | <b>17.2</b> | <b>5.4</b> | <b>651,357</b>    | <b>0.5</b> | <b>0.1</b> | <b>647,507</b>                 | <b>100.0</b> | <b>0.0</b>              | <b>1.7</b>        | <b>3.8</b> |
| Austria *                      | 2000-2014       | 28,233             | 0.0              | 24.2        | 5.9        | 19,742            | 2.9        | 0.1        | 19,150                         | 100.0        | 0.0                     | 0.0               | 0.0        |
| Belarus (Childhood) †          | -               | -                  | -                | -           | -          | -                 | -          | -          | -                              | -            | -                       | -                 | -          |
| Belgium *                      | 2004-2014       | 29,278             | 0.0              | 22.8        | 2.4        | 21,905            | 0.0        | 0.0        | 21,905                         | 100.0        | 0.0                     | 1.9               | 0.0        |
| Bulgaria *                     | 2000-2014       | 6,057              | 0.0              | 0.0         | 0.0        | 6,056             | 3.0        | 0.0        | 5,875                          | 100.0        | 0.0                     | 0.0               | 0.0        |
| Croatia *                      | 2000-2014       | 8,602              | 0.0              | 2.0         | 3.5        | 8,126             | 3.4        | 0.0        | 7,848                          | 100.0        | 0.0                     | 0.0               | 0.0        |
| Czech Republic *               | 2000-2014       | 33,285             | 0.0              | 16.0        | 0.5        | 27,802            | 0.0        | 0.0        | 27,800                         | 100.0        | 0.0                     | 0.0               | 0.0        |
| Denmark *                      | 2000-2014       | 24,683             | 0.0              | 0.0         | 0.2        | 24,630            | 0.0        | 0.0        | 24,630                         | 100.0        | 0.0                     | 0.6               | 0.0        |
| Estonia *                      | 2000-2012       | 2,556              | 0.0              | 11.8        | 9.9        | 2,002             | 0.9        | 0.0        | 1,983                          | 100.0        | 0.0                     | 1.2               | 0.0        |
| Finland *                      | 2000-2014       | 15,873             | 0.4              | 0.0         | 5.3        | 14,968            | 0.1        | 0.0        | 14,949                         | 100.0        | 0.0                     | 0.3               | 0.0        |
| French registries              | 2000-2010       | 14,962             | 0.3              | 0.0         | 6.0        | 14,017            | 0.0        | 2.4        | 13,677                         | 100.0        | 0.0                     | 3.4               | 0.0        |
| Bas-Rhin                       | 2000-2010       | 2,239              | 0.0              | 0.0         | 6.4        | 2,095             | 0.0        | 0.8        | 2,078                          | 100.0        | 0.0                     | 1.8               | 0.0        |
| Basse Normandie                | -               | -                  | -                | -           | -          | -                 | -          | -          | -                              | -            | -                       | -                 | -          |
| Burgundy Digestive             | -               | -                  | -                | -           | -          | -                 | -          | -          | -                              | -            | -                       | -                 | -          |
| Calvados                       | -               | -                  | -                | -           | -          | -                 | -          | -          | -                              | -            | -                       | -                 | -          |
| Calvados Digestive             | -               | -                  | -                | -           | -          | -                 | -          | -          | -                              | -            | -                       | -                 | -          |
| Côte-d'Or Gynaecologic         | -               | -                  | -                | -           | -          | -                 | -          | -          | -                              | -            | -                       | -                 | -          |
| Côte-d'Or Haematopoietic       | -               | -                  | -                | -           | -          | -                 | -          | -          | -                              | -            | -                       | -                 | -          |
| Doubs                          | 2000-2010       | 861                | 0.0              | 0.0         | 5.8        | 811               | 0.0        | 1.1        | 802                            | 100.0        | 0.0                     | 1.5               | 0.0        |
| Finistère                      | -               | -                  | -                | -           | -          | -                 | -          | -          | -                              | -            | -                       | -                 | -          |
| Gironde CNS                    | -               | -                  | -                | -           | -          | -                 | -          | -          | -                              | -            | -                       | -                 | -          |
| Gironde General                | 2005-2010       | 1,015              | 0.8              | 0.0         | 4.6        | 960               | 0.0        | 6.0        | 902                            | 100.0        | 0.0                     | 12.7              | 0.0        |
| Gironde Haematopoietic         | -               | -                  | -                | -           | -          | -                 | -          | -          | -                              | -            | -                       | -                 | -          |
| Haut-Rhin                      | 2000-2010       | 1,652              | 0.0              | 0.0         | 5.0        | 1,570             | 0.0        | 1.6        | 1,545                          | 100.0        | 0.0                     | 4.0               | 0.0        |
| Haute-Vienne                   | 2009-2009       | 63                 | 0.0              | 0.0         | 1.6        | 62                | 0.0        | 0.0        | 62                             | 100.0        | 0.0                     | 1.6               | 0.0        |
| Hérault                        | 2000-2010       | 1,404              | 0.0              | 0.0         | 8.8        | 1,280             | 0.0        | 2.7        | 1,245                          | 100.0        | 0.0                     | 3.2               | 0.0        |
| Isère                          | 2000-2010       | 2,073              | 0.0              | 0.0         | 5.3        | 1,963             | 0.0        | 3.4        | 1,896                          | 100.0        | 0.0                     | 1.1               | 0.0        |
| Lille Metro                    | 2008-2010       | 345                | 0.0              | 0.0         | 6.1        | 324               | 0.0        | 0.6        | 322                            | 100.0        | 0.0                     | 4.3               | 0.0        |
| Loire-Atlantique               | 2000-2010       | 3,875              | 0.9              | 0.0         | 5.5        | 3,628             | 0.0        | 3.2        | 3,512                          | 100.0        | 0.0                     | 3.2               | 0.0        |
| Manche                         | 2000-2010       | 856                | 0.0              | 0.0         | 8.4        | 784               | 0.0        | 0.9        | 777                            | 100.0        | 0.0                     | 3.6               | 0.0        |
| Somme                          | -               | -                  | -                | -           | -          | -                 | -          | -          | -                              | -            | -                       | -                 | -          |
| Tarn                           | 2000-2010       | 579                | 0.0              | 0.0         | 6.7        | 540               | 0.0        | 0.7        | 536                            | 100.0        | 0.0                     | 3.7               | 0.0        |
| France Childhood Haem †        | -               | -                  | -                | -           | -          | -                 | -          | -          | -                              | -            | -                       | -                 | -          |
| France Childhood Solid †       | -               | -                  | -                | -           | -          | -                 | -          | -          | -                              | -            | -                       | -                 | -          |
| German registries              | 2000-2014       | 99,363             | 0.3              | 16.2        | 2.6        | 80,338            | 2.0        | 0.0        | 78,713                         | 100.0        | 0.0                     | 0.6               | 28.7       |
| Brandenburg                    | 2000-2014       | 7,766              | 0.0              | 21.4        | 0.0        | 6,105             | 1.5        | 0.0        | 6,012                          | 100.0        | 0.0                     | 0.0               | 34.9       |
| Bremen                         | 2000-2013       | 2,538              | 0.0              | 27.7        | 5.2        | 1,703             | 1.6        | 0.0        | 1,676                          | 100.0        | 0.0                     | 5.3               | 0.0        |
| Hamburg                        | 2000-2013       | 4,988              | 0.0              | 0.0         | 4.3        | 4,775             | 2.4        | 0.0        | 4,659                          | 100.0        | 0.0                     | 7.5               | 0.0        |
| Lower Saxony                   | 2003-2013       | 23,612             | 1.5              | 0.0         | 4.7        | 22,149            | 2.8        | 0.0        | 21,519                         | 100.0        | 0.0                     | 0.0               | 38.7       |
| Mecklenburg-W. Pomerania       | 2000-2014       | 5,353              | 0.0              | 22.1        | 0.0        | 4,172             | 1.7        | 0.0        | 4,102                          | 100.0        | 0.0                     | 0.0               | 35.6       |
| Rhineland Palatinate           | 2000-2013       | 16,261             | 0.0              | 16.8        | 0.2        | 13,502            | 2.3        | 0.0        | 13,195                         | 100.0        | 0.0                     | 0.0               | 40.6       |
| Saarland                       | 2000-2012       | 3,051              | 0.0              | 21.3        | 3.5        | 2,294             | 0.4        | 0.0        | 2,284                          | 100.0        | 0.0                     | 0.0               | 0.0        |
| Saxony                         | 2000-2014       | 15,198             | 0.0              | 26.5        | 0.0        | 11,176            | 1.3        | 0.0        | 11,033                         | 100.0        | 0.0                     | 0.0               | 31.4       |
| Schleswig-Holstein             | 2000-2012       | 13,261             | 0.0              | 30.0        | 7.0        | 8,355             | 1.1        | 0.0        | 8,263                          | 100.0        | 0.0                     | 0.0               | 0.0        |
| Thuringia                      | 2000-2014       | 7,335              | 0.0              | 16.7        | 0.0        | 6,107             | 2.2        | 0.0        | 5,970                          | 100.0        | 0.0                     | 0.0               | 31.7       |
| Gibraltar *                    | 2000-2010       | 39                 | 0.0              | 12.8        | 7.7        | 31                | 0.0        | 0.0        | 31                             | 100.0        | 0.0                     | 0.0               | 51.6       |
| Greece (National Paediatric) † | -               | -                  | -                | -           | -          | -                 | -          | -          | -                              | -            | -                       | -                 | -          |
| Iceland *                      | 2000-2014       | 715                | 0.0              | 0.0         | 0.3        | 713               | 0.0        | 0.0        | 713                            | 100.0        | 0.0                     | 0.0               | 0.0        |
| Ireland *                      | 2000-2013       | 14,683             | 0.0              | 35.3        | 0.1        | 9,475             | 0.1        | 0.0        | 9,470                          | 100.0        | 0.0                     | 0.0               | 0.0        |
| Italian registries             | 2000-2014       | 53,776             | 0.0              | 7.8         | 5.4        | 46,634            | 0.1        | 0.0        | 46,607                         | 100.0        | 0.0                     | 1.2               | 1.5        |
| Alto Adige                     | 2000-2010       | 1,301              | 0.0              | 0.0         | 7.9        | 1,198             | 0.0        | 0.0        | 1,198                          | 100.0        | 0.0                     | 0.0               | 0.0        |
| Barletta-Andria-Trani          | 2006-2012       | 353                | 0.0              | 0.0         | 4.2        | 338               | 0.0        | 0.0        | 338                            | 100.0        | 0.0                     | 2.1               | 0.0        |
| Basilicata                     | 2006-2010       | 305                | 0.0              | 0.0         | 9.8        | 275               | 0.0        | 0.0        | 275                            | 100.0        | 0.0                     | 0.0               | 0.4        |
| Bergamo                        | 2007-2012       | 1,256              | 0.0              | 0.0         | 5.0        | 1,193             | 0.0        | 0.0        | 1,193                          | 100.0        | 0.0                     | 0.6               | 0.0        |
| Biella-Vercelli                | 2000-2010       | 666                | 0.0              | 16.4        | 5.7        | 519               | 0.4        | 0.0        | 517                            | 100.0        | 0.0                     | 0.8               | 0.8        |
| Brescia                        | 2000-2008       | 1,402              | 0.0              | 0.0         | 4.2        | 1,343             | 0.0        | 0.0        | 1,343                          | 100.0        | 0.0                     | 1.0               | 0.0        |
| Brindisi                       | 2006-2008       | 133                | 0.0              | 0.0         | 6.0        | 125               | 0.0        | 0.0        | 125                            | 100.0        | 0.0                     | 0.0               | 0.8        |
| Caserta                        | 2008-2010       | 239                | 0.0              | 0.0         | 5.9        | 225               | 0.0        | 0.0        | 225                            | 100.0        | 0.0                     | 0.0               | 8.4        |
| Catania-Messina-Enna           | 2003-2012       | 1,652              | 0.0              | 0.0         | 5.7        | 1,558             | 0.3        | 0.0        | 1,553                          | 100.0        | 0.0                     | 0.0               | 2.7        |
| Catanzaro                      | 2003-2009       | 205                | 0.0              | 0.0         | 6.8        | 191               | 0.0        | 0.0        | 191                            | 100.0        | 0.0                     | 0.5               | 0.0        |
| Como                           | 2003-2011       | 997                | 0.0              | 0.0         | 4.0        | 957               | 0.0        | 0.0        | 957                            | 100.0        | 0.0                     | 1.1               | 0.0        |
| Cremona                        | 2005-2010       | 295                | 0.0              | 0.0         | 6.8        | 275               | 0.0        | 0.0        | 275                            | 100.0        | 0.0                     | 1.5               | 0.0        |
| Ferrara                        | 2000-2011       | 653                | 0.0              | 0.5         | 4.9        | 618               | 0.0        | 0.0        | 618                            | 100.0        | 0.0                     | 1.0               | 0.0        |
| Friuli-Venezia-Giulia          | 2000-2010       | 2,926              | 0.0              | 0.0         | 6.6        | 2,734             | 0.1        | 0.0        | 2,732                          | 100.0        | 0.0                     | 0.5               | 0.0        |
| Genoa                          | 2000-2009       | 2,296              | 0.0              | 17.6        | 6.7        | 1,739             | 0.0        | 0.0        | 1,739                          | 100.0        | 0.0                     | 0.1               | 0.0        |
| Latina                         | 2000-2011       | 1,012              | 0.0              | 0.0         | 5.0        | 961               | 0.0        | 0.0        | 961                            | 100.0        | 0.0                     | 2.6               | 1.9        |
| Lecce                          | 2003-2008       | 417                | 0.0              | 0.0         | 8.9        | 380               | 0.0        | 0.0        | 380                            | 100.0        | 0.0                     | 0.3               | 1.6        |

Web-table 2.8: Data quality indicators, patients diagnosed during 2000-2014, by continent, country and registry: MELANOMA OF THE SKIN

|                      | Calendar period | Patients submitted | Ineligible (%) ¶ |         |       | Excluded (%)      |     |       | Patients included | Data quality indicators (%) †† |                         |                   |          |
|----------------------|-----------------|--------------------|------------------|---------|-------|-------------------|-----|-------|-------------------|--------------------------------|-------------------------|-------------------|----------|
|                      |                 |                    | Incomplete dates | In situ | Other | Eligible patients | DCO | Other |                   | MV                             | Non-specific morphology | Lost to follow-up | Censored |
| Mantova              | 2000-2010       | 643                | 0.0              | 0.0     | 5.9   | 605               | 0.0 | 0.0   | 605               | 100.0                          | 0.0                     | 0.0               | 0.2      |
| Milano               | 2000-2012       | 4,519              | 0.0              | 0.0     | 3.7   | 4,352             | 0.0 | 0.0   | 4,351             | 100.0                          | 0.0                     | 4.5               | 0.3      |
| Modena               | 2000-2012       | 1,778              | 0.0              | 21.9    | 4.3   | 1,313             | 0.0 | 0.0   | 1,313             | 100.0                          | 0.0                     | 0.0               | 2.2      |
| Monza-Brianza        | 2007-2012       | 893                | 0.0              | 0.0     | 3.2   | 864               | 0.0 | 0.0   | 864               | 100.0                          | 0.0                     | 0.9               | 0.0      |
| Naples               | 2000-2012       | 954                | 0.0              | 0.0     | 8.7   | 871               | 0.0 | 0.0   | 871               | 100.0                          | 0.0                     | 2.6               | 2.3      |
| Nuoro                | 2003-2012       | 122                | 0.0              | 0.0     | 11.5  | 108               | 0.0 | 0.0   | 108               | 100.0                          | 0.0                     | 0.0               | 0.0      |
| Palermo              | 2003-2012       | 1,044              | 0.0              | 0.0     | 6.1   | 980               | 0.7 | 0.0   | 973               | 100.0                          | 0.0                     | 0.2               | 0.0      |
| Parma                | 2000-2014       | 2,092              | 0.0              | 33.3    | 4.7   | 1,297             | 0.1 | 0.0   | 1,296             | 100.0                          | 0.0                     | 1.5               | 0.1      |
| Pavia                | 2003-2009       | 479                | 0.0              | 0.2     | 4.2   | 458               | 0.0 | 0.0   | 458               | 100.0                          | 0.0                     | 0.4               | 0.7      |
| Piacenza             | 2006-2011       | 284                | 0.0              | 0.0     | 4.2   | 272               | 0.0 | 0.0   | 272               | 100.0                          | 0.0                     | 0.0               | 5.5      |
| Ragusa               | 2000-2012       | 660                | 0.0              | 18.6    | 5.8   | 499               | 0.4 | 0.0   | 497               | 100.0                          | 0.0                     | 1.0               | 0.0      |
| Reggio Emilia        | 2000-2012       | 1,018              | 0.0              | 0.0     | 8.2   | 935               | 0.0 | 0.0   | 935               | 100.0                          | 0.0                     | 1.6               | 0.0      |
| Romagna              | 2000-2012       | 4,131              | 0.0              | 22.5    | 5.2   | 2,986             | 0.0 | 0.0   | 2,986             | 100.0                          | 0.0                     | 0.0               | 0.0      |
| Salerno              | 2000-2009       | 918                | 0.0              | 0.0     | 5.4   | 868               | 0.0 | 0.0   | 868               | 100.0                          | 0.0                     | 0.6               | 3.6      |
| Sassari              | 2000-2011       | 403                | 0.0              | 0.0     | 4.7   | 384               | 0.0 | 0.0   | 384               | 100.0                          | 0.0                     | 0.0               | 0.0      |
| Siracusa             | 2000-2012       | 464                | 0.0              | 0.0     | 8.4   | 425               | 0.5 | 0.0   | 423               | 100.0                          | 0.0                     | 0.0               | 1.4      |
| Sondrio              | 2000-2011       | 318                | 0.0              | 0.0     | 6.9   | 296               | 0.0 | 0.0   | 296               | 100.0                          | 0.0                     | 0.7               | 0.3      |
| Taranto              | 2006-2012       | 525                | 0.0              | 0.0     | 7.4   | 486               | 0.2 | 0.0   | 485               | 100.0                          | 0.0                     | 2.9               | 0.0      |
| Trapani              | 2002-2010       | 461                | 0.0              | 0.0     | 5.4   | 436               | 0.0 | 0.0   | 436               | 100.0                          | 0.0                     | 2.3               | 1.8      |
| Trento               | 2000-2010       | 733                | 0.0              | 0.0     | 5.5   | 693               | 0.0 | 0.0   | 693               | 100.0                          | 0.0                     | 1.9               | 0.0      |
| Turin                | 2000-2012       | 2,934              | 0.0              | 25.1    | 4.4   | 2,070             | 0.0 | 0.0   | 2,070             | 100.0                          | 0.0                     | 3.8               | 0.0      |
| Tuscany              | 2000-2009       | 3,589              | 0.0              | 23.0    | 5.8   | 2,557             | 0.1 | 0.0   | 2,555             | 100.0                          | 0.0                     | 0.0               | 5.9      |
| Umbria               | 2000-2013       | 1,921              | 0.0              | 0.0     | 5.4   | 1,818             | 0.0 | 0.0   | 1,818             | 100.0                          | 0.0                     | 0.2               | 0.1      |
| Varese               | 2000-2012       | 1,969              | 0.0              | 0.0     | 5.2   | 1,867             | 0.1 | 0.0   | 1,866             | 100.0                          | 0.0                     | 0.8               | 0.2      |
| Veneto               | 2000-2009       | 4,457              | 0.0              | 0.0     | 5.3   | 4,219             | 0.0 | 0.0   | 4,219             | 100.0                          | 0.0                     | 1.2               | 3.0      |
| Viterbo              | 2006-2010       | 359                | 0.0              | 0.0     | 3.6   | 346               | 0.3 | 0.0   | 345               | 100.0                          | 0.0                     | 0.0               | 52.5     |
| Piedmont Childhood   | -               | -                  | -                | -       | -     | -                 | -   | -     | -                 | -                              | -                       | -                 | -        |
| Latvia *             | 2000-2014       | 2,507              | 0.0              | 0.0     | 0.2   | 2,503             | 0.0 | 0.0   | 2,503             | 100.0                          | 0.0                     | 0.0               | 0.0      |
| Lithuania *          | 2000-2012       | 4,129              | 0.0              | 6.3     | 13.4  | 3,317             | 0.0 | 0.0   | 3,317             | 100.0                          | 0.0                     | 0.0               | 0.9      |
| Malta *              | 2000-2013       | 725                | 0.0              | 14.2    | 10.9  | 543               | 0.4 | 0.0   | 541               | 100.0                          | 0.0                     | 0.0               | 0.0      |
| Netherlands *        | 2000-2014       | 80,641             | 0.0              | 20.0    | 6.6   | 59,141            | 0.0 | 0.1   | 59,088            | 100.0                          | 0.0                     | 1.1               | 0.0      |
| Norway *             | 2000-2014       | 31,469             | 0.0              | 8.6     | 27.9  | 19,997            | 0.0 | 0.0   | 19,994            | 100.0                          | 0.0                     | 0.3               | 0.0      |
| Poland *             | 2000-2014       | 38,834             | 0.0              | 0.2     | 7.3   | 35,932            | 0.0 | 0.3   | 35,834            | 100.0                          | 0.0                     | 0.0               | 0.0      |
| Greater Poland       | 2000-2014       | 3,681              | 0.0              | 0.0     | 9.8   | 3,321             | 0.0 | 0.5   | 3,306             | 100.0                          | 0.0                     | 0.0               | 0.0      |
| Holy Cross           | 2000-2014       | 1,446              | 0.0              | 0.0     | 7.6   | 1,336             | 0.0 | 0.4   | 1,330             | 100.0                          | 0.0                     | 0.0               | 0.0      |
| Kujavia-Pomerania    | 2000-2014       | 1,819              | 0.0              | 0.0     | 6.5   | 1,700             | 0.0 | 0.1   | 1,699             | 100.0                          | 0.0                     | 0.0               | 0.0      |
| Lesser Poland        | 2000-2014       | 4,158              | 0.0              | 0.0     | 9.4   | 3,767             | 0.0 | 0.2   | 3,759             | 100.0                          | 0.0                     | 0.0               | 0.0      |
| Łódź                 | 2000-2014       | 2,566              | 0.0              | 0.0     | 5.8   | 2,417             | 0.0 | 0.3   | 2,410             | 100.0                          | 0.0                     | 0.0               | 0.0      |
| Lower Silesia        | 2000-2014       | 2,770              | 0.0              | 2.9     | 0.4   | 2,679             | 0.1 | 0.0   | 2,677             | 100.0                          | 0.0                     | 0.2               | 0.0      |
| Lublin               | 2000-2014       | 1,880              | 0.0              | 0.0     | 7.7   | 1,735             | 0.0 | 0.3   | 1,730             | 100.0                          | 0.0                     | 0.0               | 0.0      |
| Lubush               | 2000-2014       | 782                | 0.0              | 0.6     | 8.7   | 709               | 0.0 | 0.3   | 707               | 100.0                          | 0.0                     | 0.0               | 0.0      |
| Mazovia              | 2000-2014       | 5,770              | 0.0              | 0.0     | 7.2   | 5,353             | 0.0 | 0.1   | 5,348             | 100.0                          | 0.0                     | 0.0               | 0.0      |
| Opole                | 2000-2014       | 1,120              | 0.0              | 0.0     | 8.1   | 1,029             | 0.0 | 0.3   | 1,026             | 100.0                          | 0.0                     | 0.0               | 0.0      |
| Podlaha              | 2000-2014       | 927                | 0.0              | 0.0     | 12.9  | 807               | 0.0 | 0.5   | 803               | 100.0                          | 0.0                     | 0.0               | 0.0      |
| Pomerania            | 2000-2014       | 2,483              | 0.0              | 0.0     | 8.2   | 2,279             | 0.0 | 0.5   | 2,268             | 100.0                          | 0.0                     | 0.0               | 0.0      |
| Silesia              | 2000-2014       | 4,693              | 0.0              | 0.0     | 8.5   | 4,296             | 0.0 | 0.1   | 4,291             | 100.0                          | 0.0                     | 0.0               | 0.0      |
| Subcarpathia         | 2000-2014       | 2,018              | 0.0              | 0.0     | 6.6   | 1,885             | 0.0 | 0.7   | 1,871             | 100.0                          | 0.0                     | 0.0               | 0.0      |
| Varmia-Mazuria       | 2000-2014       | 1,122              | 0.0              | 0.0     | 7.8   | 1,035             | 0.0 | 0.2   | 1,033             | 100.0                          | 0.0                     | 0.0               | 0.2      |
| West Pomerania       | 2000-2014       | 1,599              | 0.0              | 0.0     | 0.9   | 1,584             | 0.0 | 0.5   | 1,576             | 100.0                          | 0.0                     | 0.0               | 0.0      |
| Portugal *           | 2000-2014       | 10,897             | 0.3              | 11.3    | 2.5   | 9,358             | 0.0 | 0.0   | 9,358             | 100.0                          | 0.0                     | 2.1               | 0.1      |
| Azores               | 2000-2014       | 292                | 0.0              | 0.0     | 9.6   | 264               | 0.0 | 0.0   | 264               | 100.0                          | 0.0                     | 1.1               | 3.0      |
| Portugal Central     | 2007-2010       | 590                | 0.0              | 0.0     | 0.0   | 590               | 0.0 | 0.0   | 590               | 100.0                          | 0.0                     | 0.3               | 0.0      |
| Portugal North       | 2000-2010       | 2,261              | 1.7              | 0.0     | 9.7   | 2,003             | 0.0 | 0.0   | 2,003             | 100.0                          | 0.0                     | 0.0               | 0.1      |
| Portugal South       | 2000-2014       | 7,754              | 0.0              | 15.8    | 0.3   | 6,501             | 0.0 | 0.0   | 6,501             | 100.0                          | 0.0                     | 2.9               | 0.0      |
| Romania (Cluj)       | 2006-2012       | 515                | 0.0              | 3.9     | 11.5  | 436               | 0.0 | 0.0   | 436               | 100.0                          | 0.0                     | 0.0               | 0.0      |
| Russian registries ‡ | 2000-2014       | 5,081              | 0.0              | 0.1     | 2.9   | 4,927             | 0.1 | 0.2   | 4,914             | 100.0                          | 0.0                     | 2.5               | 0.7      |
| Arkhangelsk          | 2000-2014       | 1,232              | 0.0              | 0.3     | 11.2  | 1,090             | 0.0 | 0.1   | 1,089             | 100.0                          | 0.0                     | 2.4               | 0.0      |
| Karelia              | 2000-2014       | 734                | 0.0              | 0.0     | 0.7   | 729               | 0.7 | 0.0   | 724               | 100.0                          | 0.0                     | 1.4               | 4.6      |
| Omsk                 | -               | -                  | -                | -       | -     | -                 | -   | -     | -                 | -                              | -                       | -                 | -        |
| Samara               | 2000-2014       | 3,115              | 0.0              | 0.1     | 0.2   | 3,108             | 0.0 | 0.2   | 3,101             | 100.0                          | 0.0                     | 2.7               | 0.0      |
| Tomsk                | -               | -                  | -                | -       | -     | -                 | -   | -     | -                 | -                              | -                       | -                 | -        |
| Slovakia *           | 2000-2010       | 7,933              | 0.0              | 11.1    | 7.3   | 6,478             | 1.4 | 0.0   | 6,389             | 100.0                          | 0.0                     | 0.0               | 0.0      |
| Slovenia *           | 2000-2013       | 7,442              | 0.0              | 18.8    | 5.9   | 5,605             | 0.0 | 0.0   | 5,603             | 100.0                          | 0.0                     | 0.1               | 0.0      |
| Spanish registries   | 2000-2013       | 14,320             | 0.6              | 19.1    | 3.0   | 11,072            | 0.4 | 0.0   | 11,028            | 100.0                          | 0.0                     | 0.7               | 0.0      |
| Basque Country       | 2000-2013       | 4,651              | 0.0              | 26.0    | 0.1   | 3,441             | 0.3 | 0.1   | 3,428             | 100.0                          | 0.0                     | 0.6               | 0.0      |
| Canaries             | 2000-2011       | 2,118              | 0.0              | 22.4    | 6.7   | 1,501             | 0.3 | 0.0   | 1,497             | 100.0                          | 0.0                     | 0.1               | 0.0      |
| Girona               | 2000-2013       | 1,310              | 2.1              | 21.0    | 8.3   | 898               | 0.7 | 0.0   | 892               | 100.0                          | 0.0                     | 1.7               | 0.0      |
| Granada              | 2000-2012       | 1,242              | 0.0              | 0.0     | 7.0   | 1,155             | 0.2 | 0.0   | 1,153             | 100.0                          | 0.0                     | 1.0               | 0.0      |
| Mallorca             | 2000-2012       | 1,338              | 1.9              | 26.4    | 0.1   | 958               | 0.4 | 0.1   | 953               | 100.0                          | 0.0                     | 2.2               | 0.0      |
| Murcia               | 2000-2010       | 1,546              | 0.0              | 0.0     | 5.8   | 1,457             | 0.4 | 0.0   | 1,451             | 100.0                          | 0.0                     | 0.0               | 0.1      |
| Navarra              | 2000-2010       | 989                | 0.0              | 21.7    | 0.3   | 771               | 0.1 | 0.0   | 770               | 100.0                          | 0.0                     | 0.1               | 0.0      |
| Tarragona            | 2000-2011       | 1,126              | 2.4              | 18.5    | 0.0   | 891               | 0.8 | 0.0   | 884               | 100.0                          | 0.0                     | 0.0               | 0.0      |
| Spain Childhood      | -               | -                  | -                | -       | -     | -                 | -   | -     | -                 | -                              | -                       | -                 | -        |
| Valencia Childhood   | -               | -                  | -                | -       | -     | -                 | -   | -     | -                 | -                              | -                       | -                 | -        |
| Sweden *             | 2000-2014       | 58,528             | 0.0              | 30.2    | 6.7   | 36,925            | 0.0 | 0.0   | 36,921            | 100.0                          | 0.0                     | 0.3               | 0.1      |
| Swiss registries     | 2000-2014       | 19,030             | 0.0              | 19.4    | 2.1   | 14,923            | 0.1 | 0.1   | 14,893            | 100.0                          | 0.0                     | 7.2               | 7.9      |
| Basel                | 2000-2011       | 765                | 0.0              | 0.1     | 3.0   | 741               | 0.0 | 1.8   | 728               | 100.0                          | 0.0                     | 1.6               | 18.4     |
| Fribourg             | 2006-2014       | 1,113              | 0.0              | 35.8    | 2.8   | 683               | 0.0 | 0.1   | 682               | 100.0                          | 0.0                     | 3.1               | 0.0      |
| Geneva               | 2000-2013       | 2,827              | 0.0              | 30.0    | 3.1   | 1,891             | 0.2 | 0.0   | 1,888             | 100.0                          | 0.0                     | 11.9              | 0.0      |
| Graubünden-Glarus    | 2000-2014       | 886                | 0.0              | 0.0     | 0.1   | 885               | 0.0 | 0.0   | 885               | 100.0                          | 0.0                     | 60.1              | 0.0      |
| Neuchâtel            | 2000-2014       | 1,158              | 0.0              | 36.5    | 0.3   | 731               | 0.0 | 0.0   | 731               | 100.0                          | 0.0                     | 5.9               | 2.7      |
| St Gallen-Appenzell  | 2000-2014       | 1,947              | 0.0              | 0.0     | 0.1   | 1,945             | 0.0 | 0.0   | 1,945             | 100.0                          | 0.0                     | 5.0               | 0.1      |
| Ticino               | 2000-2014       | 1,626              | 0.0              | 17.3    | 0.1   | 1,343             | 0.0 | 0.0   | 1,343             | 100.0                          | 0.0                     | 2.8               | 0.0      |
| Valais               | 2000-2014       | 1,637              | 0.0              | 28.9    | 1.3   | 1,142             | 0.0 | 0.0   | 1,142             | 100.0                          | 0.0                     | 1.8               | 0.0      |

Web-table 2.8: Data quality indicators, patients diagnosed during 2000-2014, by continent, country and registry: MELANOMA OF THE SKIN

|                              | Calendar period | Patients submitted | Ineligible (%) ¶ |             |            | Eligible patients | Excluded (%) |            | Patients included | Data quality indicators (%) †† |                         |                   |            |
|------------------------------|-----------------|--------------------|------------------|-------------|------------|-------------------|--------------|------------|-------------------|--------------------------------|-------------------------|-------------------|------------|
|                              |                 |                    | Incomplete dates | In situ     | Other      |                   | DCO          | Other      |                   | MV                             | Non-specific morphology | Lost to follow-up | Censored   |
| Zürich                       | 2000-2013       | 7,071              | 0.0              | 18.0        | 3.3        | 5,562             | 0.2          | 0.0        | 5,549             | 100.0                          | 0.0                     | 1.6               | 18.5       |
| Switzerland (Childhood) †    | -               | -                  |                  |             |            |                   |              |            |                   |                                |                         |                   |            |
| United Kingdom *             | 2000-2014       | 227,965            | 0.1              | 23.2        | 4.9        | 163,761           | 0.2          | 0.0        | 163,337           | 100.0                          | 0.0                     | 4.0               | 0.0        |
| England                      | 2000-2014       | 191,587            | 0.1              | 23.7        | 5.0        | 136,378           | 0.2          | 0.0        | 136,001           | 100.0                          | 0.0                     | 4.7               | 0.0        |
| Northern Ireland             | 2000-2014       | 6,216              | 0.4              | 30.6        | 3.9        | 4,050             | 0.0          | 0.0        | 4,048             | 100.0                          | 0.0                     | 0.0               | 0.0        |
| Scotland                     | 2000-2014       | 21,590             | 0.0              | 26.0        | 5.5        | 14,769            | 0.0          | 0.0        | 14,765            | 100.0                          | 0.0                     | 0.3               | 0.0        |
| Wales                        | 2000-2014       | 8,572              | 0.0              | 0.0         | 0.1        | 8,564             | 0.5          | 0.0        | 8,523             | 100.0                          | 0.0                     | 0.0               | 0.0        |
| <b>OCEANIA</b>               |                 | <b>273,076</b>     | <b>0.2</b>       | <b>29.6</b> | <b>1.5</b> | <b>187,846</b>    | <b>0.2</b>   | <b>0.0</b> | <b>187,512</b>    | <b>100.0</b>                   | <b>0.0</b>              | <b>0.0</b>        | <b>0.0</b> |
| Australia *                  | 2000-2014       | 241,133            | 0.2              | 33.5        | 1.4        | 156,531           | 0.1          | 0.0        | 156,302           | 100.0                          | 0.0                     | 0.0               | 0.0        |
| Australian Capital Territory | 2000-2013       | 2,738              | 0.0              | 29.8        | 4.5        | 1,797             | 0.1          | 0.0        | 1,796             | 100.0                          | 0.0                     | 0.0               | 0.1        |
| New South Wales              | 2000-2012       | 47,048             | 0.1              | 0.0         | 2.0        | 46,045            | 0.1          | 0.0        | 45,992            | 100.0                          | 0.0                     | 0.0               | 0.0        |
| Northern Territory           | 2000-2013       | 779                | 0.0              | 0.0         | 1.8        | 765               | 0.0          | 0.0        | 765               | 100.0                          | 0.0                     | 0.0               | 0.0        |
| Queensland                   | 2000-2014       | 88,007             | 0.4              | 46.9        | 0.1        | 46,277            | 0.1          | 0.0        | 46,216            | 100.0                          | 0.0                     | 0.0               | 0.0        |
| South Australia              | 2000-2013       | 9,913              | 0.0              | 0.0         | 3.6        | 9,552             | 0.0          | 0.0        | 9,550             | 100.0                          | 0.0                     | 0.0               | 0.0        |
| Tasmania                     | 2000-2013       | 5,643              | 0.0              | 34.9        | 1.1        | 3,612             | 0.1          | 0.0        | 3,609             | 100.0                          | 0.0                     | 0.0               | 0.0        |
| Victoria                     | 2000-2014       | 56,701             | 0.0              | 40.6        | 1.3        | 32,919            | 0.3          | 0.0        | 32,818            | 100.0                          | 0.0                     | 0.0               | 0.0        |
| Western Australia            | 2000-2014       | 30,304             | 0.0              | 45.0        | 3.7        | 15,564            | 0.1          | 0.0        | 15,556            | 100.0                          | 0.0                     | 0.0               | 0.0        |
| New Zealand *                | 2000-2014       | 31,943             | 0.0              | 0.0         | 2.0        | 31,315            | 0.3          | 0.0        | 31,210            | 100.0                          | 0.0                     | 0.0               | 0.0        |
| <b>Total</b>                 |                 | <b>2,262,368</b>   | <b>0.3</b>       | <b>27.0</b> | <b>3.7</b> | <b>1,560,939</b>  | <b>0.4</b>   | <b>0.1</b> | <b>1,553,109</b>  | <b>100.0</b>                   | <b>0.0</b>              | <b>1.8</b>        | <b>1.7</b> |

Web-table 2.9: Data quality indicators, women diagnosed during 2000-2014, by continent, country and registry: BREAST (WOMEN)

|                                    | Calendar period | Patients submitted | Ineligible (%) ¶ |             |            | Excluded (%) ¶¶   |            |            | Data quality indicators (%) ¶¶ |             |                         |                   |             |
|------------------------------------|-----------------|--------------------|------------------|-------------|------------|-------------------|------------|------------|--------------------------------|-------------|-------------------------|-------------------|-------------|
|                                    |                 |                    | Incomplete dates | In situ     | Other      | Eligible patients | DCO        | Other      | Patients included              | MV          | Non-specific morphology | Lost to follow-up | Censored    |
| <b>AFRICA</b>                      |                 | <b>15,986</b>      | <b>1.8</b>       | <b>0.2</b>  | <b>0.5</b> | <b>15,582</b>     | <b>0.3</b> | <b>2.7</b> | <b>15,117</b>                  | <b>98.9</b> | <b>4.4</b>              | <b>11.0</b>       | <b>42.2</b> |
| Algerian registries                | 2000-2014       | 5,725              | 2.8              | 0.2         | 0.6        | 5,519             | 0.6        | 5.3        | 5,196                          | 99.5        | 6.2                     | 0.0               | 44.6        |
| Annaba                             | 2000-2014       | 1,703              | 9.3              | 0.6         | 1.5        | 1,508             | 0.3        | 1.1        | 1,487                          | 98.3        | 0.1                     | 0.0               | 89.0        |
| Sétif                              | 2000-2010       | 1,940              | 0.2              | 0.0         | 0.1        | 1,935             | 0.0        | 11.2       | 1,718                          | 100.0       | 13.5                    | 0.0               | 57.7        |
| Tlemcen                            | 2006-2014       | 2,082              | 0.0              | 0.0         | 0.3        | 2,076             | 1.3        | 2.7        | 1,991                          | 100.0       | 4.4                     | 0.0               | 0.1         |
| Mali (Bamako)                      | 2010-2012       | 104                | 41.3             | 0.0         | 0.0        | 61                | 0.0        | 1.6        | 60                             | 100.0       | 20.0                    | 0.0               | 0.0         |
| Mauritius *                        | 2005-2009       | 500                | 0.0              | 0.0         | 0.0        | 500               | 0.0        | 3.4        | 483                            | 98.1        | 19.9                    | 0.0               | 0.0         |
| Morocco (Casablanca)               | 2008-2012       | 4,840              | 1.4              | 0.0         | 0.1        | 4,769             | 0.0        | 1.8        | 4,683                          | 100.0       | 2.4                     | 33.0              | 35.6        |
| Nigeria (Ibadan)                   | 2004-2014       | 4,076              | 0.5              | 0.6         | 0.9        | 3,993             | 0.3        | 0.5        | 3,962                          | 100.0       | 0.0                     | 0.0               | 52.9        |
| South Africa (Eastern Cape)        | 2000-2014       | 741                | 0.0              | 0.0         | 0.1        | 740               | 0.0        | 0.9        | 733                            | 82.3        | 17.9                    | 15.4              | 41.5        |
| <b>AMERICA (Central and South)</b> |                 | <b>196,263</b>     | <b>10.4</b>      | <b>4.1</b>  | <b>0.1</b> | <b>167,561</b>    | <b>3.7</b> | <b>0.8</b> | <b>159,976</b>                 | <b>95.0</b> | <b>5.2</b>              | <b>12.6</b>       | <b>3.4</b>  |
| Argentinian registries             | 2002-2013       | 16,424             | 0.9              | 1.1         | 0.1        | 16,088            | 4.9        | 0.1        | 15,282                         | 99.0        | 2.4                     | 0.0               | 0.0         |
| Chubut                             | 2008-2013       | 766                | 19.1             | 0.5         | 0.0        | 616               | 1.8        | 0.6        | 601                            | 92.3        | 10.6                    | 0.0               | 0.2         |
| Córdoba                            | 2004-2012       | 6,795              | 0.0              | 1.8         | 0.1        | 6,665             | 5.3        | 0.0        | 6,310                          | 99.5        | 1.7                     | 0.0               | 0.0         |
| Mendoza                            | 2003-2013       | 8,555              | 0.0              | 0.0         | 0.1        | 8,548             | 5.0        | 0.0        | 8,116                          | 99.1        | 2.4                     | 0.0               | 0.0         |
| Tierra del Fuego                   | 2005-2013       | 308                | 0.0              | 15.9        | 0.0        | 259               | 0.8        | 0.8        | 255                            | 98.8        | 2.0                     | 0.0               | 0.8         |
| Argentina (Childhood) †            | -               | -                  | -                | -           | -          | -                 | -          | -          | -                              | -           | -                       | -                 | -           |
| Brazilian registries               | 2000-2014       | 75,376             | 25.1             | 5.6         | 0.1        | 52,171            | 2.8        | 1.7        | 49,811                         | 90.8        | 9.3                     | 39.9              | 0.9         |
| Aracaju                            | 2000-2012       | 2,082              | 1.1              | 4.7         | 0.0        | 1,963             | 1.1        | 0.4        | 1,935                          | 99.5        | 0.9                     | 0.0               | 0.0         |
| Cuiabá                             | -               | -                  | -                | -           | -          | -                 | -          | -          | -                              | -           | -                       | -                 | -           |
| Curitiba                           | 2000-2012       | 7,624              | 0.0              | 0.0         | 0.3        | 7,602             | 5.1        | 0.6        | 7,172                          | 98.9        | 1.3                     | 0.0               | 0.0         |
| Goiânia                            | 2000-2012       | 4,504              | 9.0              | 4.3         | 0.1        | 3,902             | 0.7        | 0.8        | 3,843                          | 99.7        | 0.5                     | 0.7               | 10.9        |
| Jaú                                | 2000-2014       | 614                | 0.2              | 7.3         | 0.0        | 568               | 0.4        | 1.2        | 559                            | 99.5        | 0.9                     | 0.0               | 1.6         |
| São Paulo                          | 2000-2012       | 60,552             | 30.6             | 6.4         | 0.1        | 38,136            | 2.7        | 2.1        | 36,302                         | 87.7        | 12.4                    | 54.7              | 0.0         |
| Chilean registries                 | 2000-2012       | 3,828              | 0.0              | 0.5         | 0.2        | 3,801             | 2.1        | 0.1        | 3,717                          | 96.9        | 2.9                     | 0.0               | 26.2        |
| Antofagasta                        | 2003-2010       | 774                | 0.0              | 2.7         | 0.1        | 752               | 4.1        | 0.0        | 721                            | 96.9        | 3.3                     | 0.0               | 28.6        |
| Biobío                             | 2003-2012       | 739                | 0.0              | 0.0         | 0.1        | 738               | 1.5        | 0.0        | 727                            | 96.6        | 4.0                     | 0.0               | 13.1        |
| Concepción                         | 2006-2010       | 1,334              | 0.0              | 0.0         | 0.1        | 1,333             | 2.0        | 0.0        | 1,307                          | 96.2        | 3.9                     | 0.0               | 32.4        |
| Los Ríos                           | 2000-2012       | 981                | 0.0              | 0.0         | 0.3        | 978               | 1.2        | 0.4        | 962                            | 98.2        | 0.2                     | 0.0               | 25.8        |
| Colombian registries               | 2000-2014       | 10,119             | 2.8              | 0.2         | 0.3        | 9,787             | 1.1        | 0.7        | 9,609                          | 96.1        | 4.3                     | 0.0               | 28.0        |
| Bucaramanga                        | -               | -                  | -                | -           | -          | -                 | -          | -          | -                              | -           | -                       | -                 | -           |
| Cali                               | 2000-2014       | 8,334              | 1.1              | 0.0         | 0.3        | 8,217             | 1.2        | 0.6        | 8,069                          | 96.4        | 3.7                     | 0.0               | 29.2        |
| Manizales                          | 2003-2012       | 1,060              | 15.8             | 0.0         | 0.3        | 889               | 0.3        | 1.7        | 871                            | 92.8        | 8.4                     | 0.0               | 38.2        |
| Pasto                              | 2000-2012       | 725                | 3.6              | 2.2         | 0.3        | 681               | 1.0        | 0.7        | 669                            | 97.2        | 5.4                     | 0.0               | 0.1         |
| Costa Rica *                       | 2002-2014       | 12,319             | 0.0              | 0.0         | 0.1        | 12,310            | 1.8        | 0.5        | 12,019                         | 92.9        | 9.0                     | 0.0               | 0.0         |
| Cuba *                             | 2000-2012       | 36,064             | 0.0              | 0.0         | 0.1        | 36,022            | 7.3        | 0.2        | 33,313                         | 96.3        | 3.4                     | 0.0               | 0.0         |
| Ecuadorian registries              | 2000-2013       | 9,589              | 6.8              | 2.9         | 0.1        | 8,648             | 2.3        | 2.0        | 8,283                          | 97.3        | 3.6                     | 0.0               | 3.4         |
| Cuenca                             | 2000-2012       | 699                | 51.4             | 1.1         | 0.4        | 329               | 0.6        | 2.4        | 319                            | 95.9        | 4.7                     | 0.0               | 37.3        |
| Guayaquil                          | 2005-2013       | 3,130              | 0.0              | 2.2         | 0.1        | 3,057             | 0.8        | 3.6        | 2,923                          | 96.2        | 4.7                     | 0.0               | 0.0         |
| Loja                               | 2000-2013       | 352                | 0.0              | 4.5         | 0.6        | 334               | 0.3        | 0.0        | 333                            | 94.0        | 7.2                     | 0.9               | 0.0         |
| Manabí                             | 2000-2013       | 1,408              | 4.6              | 1.8         | 0.3        | 1,314             | 5.3        | 0.8        | 1,234                          | 98.1        | 2.3                     | 0.0               | 0.4         |
| Quito                              | 2000-2013       | 4,000              | 5.6              | 4.0         | 0.1        | 3,614             | 2.7        | 1.2        | 3,474                          | 98.3        | 2.6                     | 0.0               | 4.6         |
| Guadeloupe *                       | 2008-2013       | 1,352              | 0.0              | 6.2         | 0.0        | 1,268             | 0.0        | 0.2        | 1,266                          | 100.0       | 0.9                     | 0.0               | 70.7        |
| Martinique *                       | 2000-2012       | 2,354              | 0.0              | 0.0         | 0.0        | 2,353             | 0.0        | 3.1        | 2,279                          | 99.3        | 0.8                     | 9.0               | 0.0         |
| Mexico (Childhood) †               | -               | -                  | -                | -           | -          | -                 | -          | -          | -                              | -           | -                       | -                 | -           |
| Peru (Lima)                        | 2010-2012       | 6,046              | 0.1              | 0.0         | 0.3        | 6,020             | 6.8        | 0.3        | 5,590                          | 91.3        | 0.8                     | 0.0               | 2.0         |
| Puerto Rico *                      | 2000-2011       | 22,792             | 1.9              | 14.1        | 0.2        | 19,093            | 1.4        | 0.1        | 18,807                         | 99.7        | 1.2                     | 0.0               | 0.0         |
| Uruguay *                          | -               | -                  | -                | -           | -          | -                 | -          | -          | -                              | -           | -                       | -                 | -           |
| <b>AMERICA (North)</b>             |                 | <b>3,180,468</b>   | <b>0.4</b>       | <b>17.3</b> | <b>0.2</b> | <b>2,613,649</b>  | <b>0.8</b> | <b>0.2</b> | <b>2,587,798</b>               | <b>99.3</b> | <b>1.1</b>              | <b>2.0</b>        | <b>0.0</b>  |
| Canadian registries                | 2000-2014       | 271,006            | 0.1              | 11.3        | 0.2        | 239,618           | 0.5        | 0.4        | 237,321                        | 98.7        | 1.5                     | 0.0               | 0.0         |
| Alberta                            | 2000-2014       | 31,930             | 0.1              | 11.4        | 0.2        | 28,177            | 0.1        | 0.7        | 27,939                         | 99.6        | 0.5                     | 0.0               | 0.0         |
| British Columbia                   | 2000-2014       | 49,329             | 0.3              | 13.1        | 0.9        | 42,285            | 0.4        | 0.3        | 41,961                         | 99.6        | 0.5                     | 0.0               | 0.0         |
| Manitoba                           | 2000-2014       | 13,022             | 0.0              | 11.2        | 0.2        | 11,534            | 0.6        | 0.5        | 11,414                         | 99.3        | 0.8                     | 0.0               | 0.0         |
| New Brunswick                      | 2000-2014       | 8,609              | 0.0              | 11.0        | 0.3        | 7,638             | 0.1        | 0.1        | 7,625                          | 98.6        | 0.1                     | 0.0               | 0.0         |
| Newfoundland & Labrador            | 2000-2014       | 5,844              | 0.1              | 11.6        | 0.4        | 5,134             | 0.6        | 0.0        | 5,101                          | 99.3        | 0.8                     | 0.0               | 0.0         |
| Nova Scotia                        | 2000-2014       | 11,646             | 0.2              | 11.9        | 0.2        | 10,215            | 0.4        | 0.4        | 10,126                         | 98.6        | 1.6                     | 0.0               | 0.0         |
| Ontario                            | 2000-2014       | 138,059            | 0.0              | 10.6        | 0.0        | 123,451           | 0.7        | 0.4        | 122,092                        | 98.0        | 2.3                     | 0.0               | 0.0         |
| Prince Edward Island               | 2000-2014       | 1,705              | 0.0              | 12.3        | 0.2        | 1,492             | 0.1        | 1.1        | 1,474                          | 99.4        | 1.0                     | 0.0               | 0.0         |
| Saskatchewan                       | 2000-2014       | 10,862             | 0.0              | 10.6        | 0.2        | 9,692             | 0.6        | 0.4        | 9,589                          | 99.1        | 1.1                     | 0.0               | 0.0         |
| US registries                      | 2000-2014       | 2,909,462          | 0.4              | 17.8        | 0.2        | 2,374,031         | 0.8        | 0.2        | 2,350,477                      | 99.3        | 1.1                     | 2.2               | 0.0         |
| Alabama                            | 2000-2014       | 56,669             | 0.5              | 16.9        | 0.1        | 46,740            | 0.7        | 0.1        | 46,329                         | 98.2        | 2.1                     | 0.0               | 0.0         |
| Alaska                             | 2000-2013       | 6,315              | 1.3              | 20.1        | 0.1        | 4,959             | 0.2        | 0.2        | 4,938                          | 99.4        | 1.4                     | 0.0               | 0.0         |
| Arkansas                           | 2000-2011       | 25,560             | 0.2              | 16.3        | 0.2        | 21,302            | 0.4        | 0.1        | 21,184                         | 99.7        | 0.5                     | 0.0               | 0.0         |
| California                         | 2000-2011       | 311,440            | 0.8              | 17.0        | 0.2        | 255,276           | 0.4        | 0.3        | 253,406                        | 99.6        | 0.6                     | 0.0               | 0.0         |
| Greater Bay Area                   | 2000-2014       | 80,791             | 0.5              | 19.0        | 0.2        | 64,874            | 0.4        | 0.3        | 64,402                         | 99.8        | 0.3                     | 8.8               | 0.0         |
| Greater California                 | 2000-2014       | 214,924            | 0.8              | 17.0        | 0.2        | 176,371           | 0.5        | 0.3        | 175,010                        | 99.5        | 0.7                     | 9.9               | 0.0         |
| Los Angeles                        | 2000-2014       | 96,839             | 1.1              | 16.4        | 0.2        | 79,718            | 0.4        | 0.4        | 79,105                         | 99.7        | 0.5                     | 21.3              | 0.0         |
| Colorado                           | 2000-2013       | 50,145             | 0.1              | 18.1        | 0.1        | 40,960            | 1.2        | 0.1        | 40,427                         | 99.5        | 0.7                     | 0.0               | 0.0         |
| Connecticut                        | 2000-2014       | 52,622             | 0.1              | 22.5        | 0.3        | 40,567            | 0.5        | 0.2        | 40,285                         | 99.7        | 0.6                     | 6.4               | 0.0         |
| Delaware                           | 2000-2014       | 12,102             | 0.2              | 20.6        | 0.1        | 9,562             | 0.7        | 0.0        | 9,495                          | 99.6        | 0.6                     | 0.0               | 0.0         |
| Florida                            | 2000-2013       | 220,242            | 0.0              | 17.2        | 0.2        | 182,007           | 0.8        | 0.2        | 180,236                        | 99.6        | 1.4                     | 0.0               | 0.0         |
| Georgia                            | 2000-2014       | 103,074            | 0.0              | 18.0        | 0.2        | 84,322            | 0.7        | 0.2        | 83,576                         | 99.6        | 0.8                     | 0.0               | 0.0         |
| Atlanta                            | 2000-2014       | 36,008             | 0.0              | 20.0        | 0.2        | 28,764            | 0.5        | 0.2        | 28,576                         | 99.7        | 0.8                     | 0.0               | 0.0         |
| Hawaii                             | 2000-2014       | 16,919             | 0.1              | 20.6        | 0.2        | 13,379            | 0.3        | 0.2        | 13,317                         | 99.7        | 0.4                     | 4.5               | 0.0         |
| Idaho                              | 2000-2014       | 15,748             | 0.3              | 15.3        | 0.1        | 13,273            | 1.0        | 0.1        | 13,125                         | 99.5        | 0.6                     | 0.0               | 0.0         |
| Indiana                            | 2000-2014       | 74,434             | 0.2              | 17.0        | 0.2        | 61,517            | 0.8        | 0.1        | 60,964                         | 99.6        | 0.8                     | 0.0               | 0.0         |
| Iowa                               | 2000-2014       | 37,283             | 0.3              | 16.7        | 0.2        | 30,896            | 0.5        | 0.2        | 30,684                         | 99.4        | 0.7                     | 3.1               | 0.0         |
| Kentucky                           | 2000-2014       | 51,189             | 0.0              | 15.7        | 0.1        | 43,099            | 0.4        | 0.2        | 42,843                         | 99.0        | 1.1                     | 1.4               | 0.0         |
| Louisiana                          | 2000-2014       | 50,698             | 0.2              | 15.3        | 0.2        | 42,774            | 0.6        | 0.2        | 42,433                         | 99.6        | 0.5                     | 3.8               | 0.1         |
| Maine                              | 2000-2013       | 18,114             | 0.1              | 18.9        | 0.2        | 14,631            | 0.9        | 0.2        | 14,477                         | 99.4        | 0.6                     | 0.0               | 0.0         |
| Massachusetts                      | 2000-2009       | 64,677             | 0.0              | 23.8        | 0.2        | 49,133            | 0.8        | 0.2        | 48,637                         | 99.0        | 1.1                     | 0.0               | 0.0         |
| Michigan                           | 2000-2013       | 118,245            | 0.2              | 19.5        | 0.2        | 94,738            | 0.5        | 0.3        | 93,981                         | 99.0        | 1.2                     | 0.0               | 0.0         |

Web-table 2.9: Data quality indicators, women diagnosed during 2000-2014, by continent, country and registry: BREAST (WOMEN)

|                     | Calendar period | Patients submitted | Ineligible (%) ¶ |            |            | Excluded (%) ¶¶   |            |            | Patients included | Data quality indicators (%) †† |                         |                   |            |
|---------------------|-----------------|--------------------|------------------|------------|------------|-------------------|------------|------------|-------------------|--------------------------------|-------------------------|-------------------|------------|
|                     |                 |                    | Incomplete dates | In situ    | Other      | Eligible patients | DCO        | Other      |                   | MV                             | Non-specific morphology | Lost to follow-up | Censored   |
| Detroit             | 2000-2014       | 52,429             | 0.3              | 20.9       | 0.2        | 41,246            | 0.6        | 0.4        | 40,824            | 99.7                           | 0.4                     | 3.8               | 0.0        |
| Minnesota           | 2000-2013       | 59,491             | 0.0              | 16.8       | 0.2        | 49,361            | 0.8        | 0.5        | 48,694            | 100.0                          | 0.0                     | 0.0               | 0.0        |
| Mississippi         | 2002-2014       | 28,018             | 0.4              | 15.2       | 0.1        | 23,612            | 1.1        | 0.1        | 23,323            | 99.6                           | 0.7                     | 0.0               | 0.0        |
| Missouri            | 2000-2010       | 52,505             | 0.2              | 16.1       | 0.1        | 43,881            | 0.9        | 0.1        | 43,425            | 98.8                           | 1.5                     | 0.0               | 0.0        |
| Montana             | 2000-2014       | 12,363             | 0.4              | 17.2       | 0.1        | 10,170            | 1.3        | 0.1        | 10,024            | 99.5                           | 0.7                     | 0.0               | 0.0        |
| Nebraska            | 2000-2014       | 21,781             | 0.2              | 16.5       | 0.2        | 18,085            | 0.9        | 0.1        | 17,910            | 99.2                           | 0.9                     | 0.0               | 0.0        |
| New Hampshire       | 2000-2014       | 18,763             | 0.1              | 20.1       | 0.2        | 14,938            | 0.6        | 0.1        | 14,824            | 99.5                           | 0.6                     | 0.0               | 0.0        |
| New Jersey          | 2000-2014       | 119,432            | 0.5              | 20.7       | 0.2        | 93,893            | 0.6        | 0.1        | 93,196            | 99.5                           | 0.8                     | 46.3              | 0.0        |
| New Mexico          | 2000-2014       | 20,193             | 0.0              | 14.4       | 0.1        | 17,251            | 1.0        | 0.2        | 17,054            | 99.4                           | 1.2                     | 7.2               | 0.3        |
| New York            | 2000-2014       | 260,602            | 1.4              | 20.5       | 0.2        | 202,740           | 0.5        | 0.4        | 200,953           | 99.6                           | 0.6                     | 0.0               | 0.0        |
| New York City       | 2000-2014       | 96,572             | 1.8              | 21.0       | 0.3        | 74,349            | 0.4        | 0.5        | 73,673            | 99.8                           | 0.5                     | 0.0               | 0.0        |
| North Carolina      | 2000-2014       | 113,523            | 0.0              | 17.0       | 0.1        | 94,119            | 0.9        | 0.2        | 93,082            | 99.4                           | 1.0                     | 0.0               | 0.0        |
| Ohio                | 2000-2014       | 145,951            | 0.1              | 16.9       | 0.2        | 121,004           | 1.6        | 0.1        | 118,912           | 99.4                           | 1.0                     | 0.0               | 0.0        |
| Oklahoma            | 2000-2010       | 31,788             | 0.2              | 14.7       | 0.2        | 26,992            | 1.5        | 0.1        | 26,557            | 98.3                           | 3.6                     | 0.0               | 0.0        |
| Oregon              | 2000-2013       | 45,977             | 0.0              | 16.9       | 0.1        | 38,140            | 1.1        | 0.1        | 37,666            | 98.9                           | 1.4                     | 0.0               | 0.0        |
| Pennsylvania        | 2000-2014       | 177,005            | 0.4              | 18.2       | 0.2        | 143,657           | 0.9        | 0.2        | 142,126           | 99.5                           | 0.7                     | 0.0               | 0.0        |
| Rhode Island        | 2000-2014       | 14,873             | 0.1              | 19.0       | 0.2        | 11,998            | 0.9        | 0.1        | 11,885            | 99.4                           | 0.8                     | 0.0               | 0.0        |
| South Carolina      | 2000-2014       | 56,288             | 0.0              | 17.2       | 0.1        | 46,507            | 1.0        | 0.3        | 45,903            | 99.0                           | 1.3                     | 0.0               | 0.0        |
| Tennessee           | 2000-2011       | 57,489             | 0.3              | 16.1       | 0.1        | 48,041            | 1.0        | 0.1        | 47,524            | 99.0                           | 1.2                     | 0.0               | 0.0        |
| Texas               | 2000-2013       | 217,061            | 0.7              | 16.0       | 0.1        | 180,447           | 1.1        | 0.2        | 178,119           | 98.4                           | 3.0                     | 0.0               | 0.0        |
| Utah                | 2000-2014       | 20,213             | 0.1              | 16.1       | 0.1        | 16,903            | 0.2        | 0.1        | 16,849            | 99.5                           | 0.6                     | 8.0               | 0.1        |
| Vermont             | 2000-2013       | 8,284              | 0.0              | 19.9       | 0.1        | 6,621             | 0.9        | 0.1        | 6,550             | 99.4                           | 0.7                     | 0.0               | 0.0        |
| Washington          | 2000-2008       | 47,688             | 0.2              | 18.5       | 0.1        | 38,713            | 0.5        | 0.2        | 38,445            | 99.6                           | 0.6                     | 0.0               | 0.0        |
| Seattle             | 2000-2014       | 58,502             | 0.1              | 19.5       | 0.2        | 46,920            | 0.3        | 0.4        | 46,581            | 99.6                           | 0.5                     | 1.7               | 0.0        |
| West Virginia       | 2000-2014       | 23,179             | 0.5              | 15.7       | 0.2        | 19,400            | 0.5        | 0.1        | 19,279            | 98.9                           | 1.4                     | 0.0               | 0.0        |
| Wisconsin           | 2000-2013       | 66,306             | 0.3              | 18.0       | 0.2        | 53,997            | 1.0        | 0.1        | 53,430            | 99.4                           | 0.8                     | 0.0               | 0.0        |
| Wyoming             | 2000-2013       | 5,213              | 0.1              | 14.9       | 0.1        | 4,426             | 0.2        | 0.1        | 4,410             | 99.7                           | 0.8                     | 0.0               | 0.0        |
| <b>ASIA</b>         |                 | <b>797,490</b>     | <b>0.8</b>       | <b>5.4</b> | <b>0.2</b> | <b>746,498</b>    | <b>1.5</b> | <b>1.1</b> | <b>726,968</b>    | <b>97.8</b>                    | <b>3.9</b>              | <b>0.9</b>        | <b>1.5</b> |
| Chinese registries  | 2003-2013       | 54,837             | 0.3              | 0.3        | 0.0        | 54,492            | 0.3        | 1.0        | 53,791            | 92.8                           | 11.6                    | 7.8               | 0.2        |
| Beijing             | 2003-2013       | 26,622             | 0.0              | 0.0        | 0.0        | 26,617            | 0.2        | 0.6        | 26,418            | 95.4                           | 4.6                     | 13.0              | 0.2        |
| Changle             | 2003-2013       | 521                | 4.6              | 0.6        | 0.2        | 493               | 0.2        | 2.6        | 479               | 87.1                           | 23.6                    | 3.8               | 0.2        |
| Cixian              | 2003-2013       | 538                | 0.0              | 0.0        | 0.0        | 538               | 1.5        | 0.2        | 529               | 90.9                           | 9.1                     | 0.0               | 0.0        |
| Dafeng              | 2003-2013       | 861                | 0.0              | 0.0        | 0.0        | 861               | 0.1        | 0.7        | 854               | 87.9                           | 28.6                    | 0.0               | 0.0        |
| Dalian              | 2003-2013       | 8,293              | 0.0              | 0.0        | 0.0        | 8,292             | 0.9        | 0.7        | 8,166             | 97.2                           | 4.4                     | 0.0               | 0.1        |
| Donghai             | 2003-2013       | 1,047              | 0.2              | 0.0        | 0.0        | 1,045             | 1.7        | 2.4        | 1,002             | 59.1                           | 41.4                    | 8.0               | 0.0        |
| Feicheng            | 2003-2013       | 1,177              | 0.0              | 0.3        | 0.0        | 1,174             | 0.0        | 2.0        | 1,150             | 89.2                           | 11.7                    | 8.4               | 0.0        |
| Ganyu               | 2003-2013       | 1,050              | 0.0              | 0.0        | 0.0        | 1,050             | 0.1        | 5.0        | 997               | 46.5                           | 57.7                    | 3.0               | 0.1        |
| Guanyun             | 2004-2013       | 1,047              | 0.0              | 0.0        | 0.0        | 1,047             | 0.3        | 2.3        | 1,020             | 99.6                           | 0.4                     | 3.9               | 0.0        |
| Haimen              | 2003-2013       | 1,859              | 0.0              | 0.0        | 0.3        | 1,853             | 0.3        | 0.9        | 1,832             | 94.3                           | 5.7                     | 0.7               | 0.1        |
| Haining             | 2003-2013       | 1,193              | 0.0              | 0.4        | 0.0        | 1,188             | 0.0        | 1.0        | 1,176             | 98.7                           | 20.6                    | 0.2               | 0.0        |
| Jianhu              | 2003-2013       | 653                | 0.0              | 0.0        | 0.0        | 653               | 0.0        | 1.5        | 643               | 90.0                           | 88.3                    | 10.0              | 0.0        |
| Jiashan             | 2003-2013       | 967                | 0.0              | 1.0        | 0.1        | 956               | 0.1        | 0.9        | 946               | 97.5                           | 2.5                     | 1.2               | 0.0        |
| Jintan              | 2003-2013       | 745                | 0.0              | 0.5        | 0.3        | 739               | 0.8        | 3.4        | 708               | 47.0                           | 53.0                    | 2.8               | 0.0        |
| Lianyungang         | 2008-2013       | 1,059              | 0.0              | 0.0        | 0.1        | 1,058             | 0.6        | 0.9        | 1,042             | 91.0                           | 27.6                    | 24.1              | 0.4        |
| Linzhou             | 2003-2013       | 1,056              | 0.0              | 0.1        | 0.0        | 1,055             | 0.9        | 1.4        | 1,030             | 89.6                           | 10.4                    | 0.0               | 0.0        |
| Qidong              | 2003-2013       | 1,869              | 0.0              | 0.0        | 0.1        | 1,867             | 0.0        | 1.3        | 1,843             | 95.6                           | 4.4                     | 2.1               | 0.0        |
| Sihui               | 2003-2013       | 446                | 4.9              | 0.0        | 0.2        | 423               | 0.5        | 0.9        | 417               | 87.8                           | 31.7                    | 4.1               | 1.4        |
| Taixing             | 2003-2013       | 822                | 12.3             | 0.0        | 0.0        | 721               | 0.0        | 1.9        | 707               | 81.8                           | 92.6                    | 6.1               | 0.0        |
| Yangzhong           | 2003-2013       | 519                | 0.0              | 0.4        | 0.0        | 517               | 0.0        | 2.7        | 503               | 85.5                           | 96.4                    | 0.0               | 0.4        |
| Zhongshan           | 2003-2013       | 2,493              | 0.0              | 5.8        | 0.2        | 2,345             | 0.0        | 0.7        | 2,329             | 98.5                           | 2.7                     | 0.2               | 0.0        |
| Cyprus *            | 2004-2014       | 5,839              | 0.4              | 8.4        | 0.1        | 5,318             | 3.7        | 1.0        | 5,069             | 99.7                           | 1.0                     | 0.0               | 40.6       |
| Hong Kong *         | 2005-2014       | 30,544             | 4.8              | 0.0        | 0.0        | 29,081            | 0.1        | 0.3        | 28,956            | 99.4                           | 0.0                     | 6.6               | 0.0        |
| Indian registries   | 2000-2014       | 824                | 0.1              | 0.0        | 0.0        | 823               | 0.2        | 1.1        | 812               | 95.9                           | 6.7                     | 0.5               | 0.0        |
| Guwahati            | -               | -                  | -                | -          | -          | -                 | -          | -          | -                 | -                              | -                       | -                 | -          |
| Karunagappally      | 2000-2014       | 824                | 0.1              | 0.0        | 0.0        | 823               | 0.2        | 1.1        | 812               | 95.9                           | 6.7                     | 0.5               | 0.0        |
| Iran (Golestan)     | -               | -                  | -                | -          | -          | -                 | -          | -          | -                 | -                              | -                       | -                 | -          |
| Israel *            | 2000-2013       | 58,452             | 0.0              | 9.2        | 0.6        | 52,770            | 1.8        | 1.3        | 51,125            | 98.7                           | 1.7                     | 0.0               | 0.0        |
| Japanese registries | 2000-2014       | 215,638            | 1.5              | 7.9        | 0.2        | 194,864           | 4.8        | 0.6        | 184,372           | 97.6                           | 6.9                     | 0.0               | 2.7        |
| Aichi               | 2003-2013       | 34,996             | 0.3              | 10.1       | 0.2        | 31,270            | 3.5        | 0.7        | 29,946            | 98.9                           | 2.7                     | 0.0               | 3.7        |
| Akita               | 2010-2014       | 3,297              | 1.1              | 9.6        | 0.2        | 2,934             | 0.0        | 3.0        | 2,846             | 97.3                           | 4.4                     | 0.0               | 58.0       |
| Ehime               | 2007-2013       | 6,398              | 0.1              | 8.8        | 0.3        | 5,815             | 6.2        | 0.8        | 5,409             | 98.6                           | 3.2                     | 0.0               | 0.0        |
| Fukui               | 2003-2009       | 2,541              | 0.0              | 10.3       | 0.5        | 2,266             | 0.9        | 1.1        | 2,219             | 97.7                           | 3.5                     | 0.0               | 3.5        |
| Gunma               | 2003-2012       | 9,088              | 28.6             | 4.7        | 0.0        | 6,058             | 8.4        | 0.7        | 5,507             | 98.1                           | 2.3                     | 0.0               | 2.1        |
| Hiroshima           | 2004-2008       | 7,238              | 0.2              | 8.3        | 0.2        | 6,610             | 2.7        | 0.0        | 6,430             | 99.7                           | 0.6                     | 0.0               | 0.6        |
| Hyogo               | 2007-2012       | 15,201             | 1.2              | 9.1        | 0.4        | 13,567            | 12.2       | 0.6        | 11,821            | 98.8                           | 2.8                     | 0.0               | 1.8        |
| Ibaraki             | 2006-2012       | 9,808              | 0.3              | 8.1        | 0.3        | 8,955             | 5.8        | 0.6        | 8,380             | 94.1                           | 16.1                    | 0.0               | 1.6        |
| Kanagawa            | 2000-2013       | 49,604             | 0.0              | 6.9        | 0.1        | 46,135            | 6.2        | 0.6        | 42,993            | 96.5                           | 17.1                    | 0.0               | 0.0        |
| Miyagi              | 2000-2010       | 12,935             | 1.1              | 12.2       | 0.0        | 11,213            | 2.3        | 0.0        | 10,953            | 98.0                           | 2.6                     | 0.0               | 1.9        |
| Niigata             | 2000-2013       | 15,434             | 0.1              | 5.6        | 0.2        | 14,522            | 2.8        | 0.6        | 14,025            | 98.3                           | 0.5                     | 0.0               | 0.0        |
| Osaka               | 2000-2008       | 29,302             | 0.0              | 5.0        | 0.2        | 27,790            | 2.9        | 0.6        | 26,828            | 96.7                           | 5.5                     | 0.0               | 5.2        |
| Saga                | 2006-2013       | 2,802              | 0.5              | 8.9        | 0.5        | 2,525             | 3.4        | 0.7        | 2,422             | 97.8                           | 3.3                     | 0.0               | 0.0        |
| Tochigi             | 2006-2013       | 8,012              | 0.6              | 9.6        | 0.2        | 7,182             | 3.9        | 0.7        | 6,851             | 98.7                           | 2.2                     | 0.0               | 1.2        |
| Yamagata            | 2003-2013       | 6,478              | 0.6              | 9.0        | 0.2        | 5,850             | 2.3        | 0.6        | 5,682             | 98.5                           | 2.9                     | 0.0               | 0.5        |
| Yamanashi           | 2008-2012       | 2,504              | 0.4              | 12.6       | 0.2        | 2,172             | 4.7        | 0.5        | 2,060             | 98.2                           | 2.5                     | 0.0               | 0.3        |
| Jordan *            | 2000-2014       | 12,158             | 0.2              | 2.7        | 0.1        | 11,794            | 0.1        | 1.7        | 11,584            | 99.8                           | 1.4                     | 3.5               | 0.0        |
| Korea * ‡           | 2000-2014       | 180,404            | 0.5              | 0.0        | 0.0        | 179,522           | 0.0        | 0.0        | 179,520           | 98.9                           | 1.5                     | 0.0               | 0.0        |
| Kuwait *            | 2000-2013       | 2,698              | 0.0              | 3.6        | 0.2        | 2,595             | 0.5        | 0.6        | 2,568             | 100.0                          | 0.1                     | 0.4               | 0.0        |
| Malaysia (Penang)   | 2000-2013       | 4,730              | 0.1              | 0.0        | 0.0        | 4,724             | 0.3        | 2.2        | 4,606             | 97.7                           | 4.1                     | 0.0               | 20.2       |
| Mongolia *          | 2003-2014       | 1,025              | 0.0              | 1.1        | 0.0        | 1,014             | 0.3        | 1.2        | 999               | 77.0                           | 4.1                     | 7.6               | 0.0        |
| Qatar *             | 2000-2014       | 1,922              | 0.0              | 2.2        | 0.2        | 1,876             | 0.7        | 0.1        | 1,861             | 99.2                           | 1.6                     | 0.0               | 45.1       |
| Singapore *         | 2000-2014       | 26,535             | 0.0              | 13.3       | 1.4        | 22,636            | 0.2        | 0.5        | 22,473            | 99.4                           | 0.3                     | 0.0               | 0.0        |
| Taiwan *            | 2000-2014       | 131,648            | 0.1              | 11.1       | 0.0        | 116,929           | 0.0        | 0.0        | 116,929           | 99.3                           | 0.2                     | 0.0               | 0.0        |

Web-table 2.9: Data quality indicators, women diagnosed during 2000-2014, by continent, country and registry: BREAST (WOMEN)

|                                | Calendar period | Patients submitted | Ineligible (%) ¶ |            |            | Excluded (%) ¶¶   |            |            | Patients included | Data quality indicators (%) †† |                         |                   |            |
|--------------------------------|-----------------|--------------------|------------------|------------|------------|-------------------|------------|------------|-------------------|--------------------------------|-------------------------|-------------------|------------|
|                                |                 |                    | Incomplete dates | In situ    | Other      | Eligible patients | DCO        | Other      |                   | MV                             | Non-specific morphology | Lost to follow-up | Censored   |
| Thai registries                | 2000-2014       | 30,289             | 0.0              | 0.9        | 0.2        | 29,943            | 1.3        | 15.2       | 25,001            | 89.3                           | 11.0                    | 0.0               | 3.1        |
| Bangkok                        | 2000-2012       | 17,759             | 0.0              | 1.6        | 0.2        | 17,433            | 1.8        | 25.2       | 12,738            | 87.7                           | 12.4                    | 0.0               | 0.0        |
| Khon Kaen                      | 2000-2014       | 3,415              | 0.0              | 0.0        | 0.0        | 3,414             | 0.3        | 0.7        | 3,378             | 93.3                           | 7.3                     | 0.0               | 2.8        |
| Lampang                        | 2000-2014       | 2,308              | 0.0              | 0.0        | 0.0        | 2,308             | 0.6        | 1.0        | 2,269             | 93.8                           | 6.2                     | 0.0               | 0.0        |
| Lamphun                        | 2000-2014       | 1,330              | 0.0              | 0.0        | 0.0        | 1,330             | 1.2        | 2.0        | 1,288             | 87.9                           | 12.1                    | 0.0               | 0.0        |
| Lopburi                        | 2000-2014       | 2,571              | 0.0              | 0.0        | 0.2        | 2,565             | 0.7        | 3.0        | 2,471             | 79.8                           | 20.2                    | 0.1               | 26.0       |
| Songkhla                       | 2000-2014       | 2,906              | 0.0              | 0.0        | 0.4        | 2,893             | 0.7        | 0.5        | 2,857             | 97.6                           | 4.3                     | 0.2               | 1.0        |
| Turkish registries             | 2000-2013       | 39,947             | 1.5              | 3.0        | 0.0        | 38,117            | 0.5        | 1.6        | 37,302            | 97.9                           | 5.3                     | 0.2               | 2.8        |
| Ankara                         | 2008-2012       | 12,360             | 0.0              | 3.7        | 0.1        | 11,890            | 0.2        | 1.2        | 11,721            | 99.8                           | 2.9                     | 0.0               | 1.0        |
| Antalya                        | 2006-2012       | 2,848              | 0.3              | 2.5        | 0.0        | 2,770             | 0.2        | 1.2        | 2,732             | 99.0                           | 3.6                     | 0.0               | 0.9        |
| Bursa                          | 2006-2012       | 3,877              | 3.9              | 0.0        | 0.1        | 3,721             | 0.9        | 1.6        | 3,626             | 97.6                           | 5.9                     | 0.0               | 0.0        |
| Edirne                         | 2006-2012       | 639                | 2.5              | 0.0        | 0.2        | 622               | 0.6        | 2.4        | 603               | 95.7                           | 7.1                     | 0.0               | 0.0        |
| Erzurum                        | 2006-2012       | 693                | 0.9              | 1.3        | 0.0        | 678               | 0.1        | 1.5        | 667               | 90.0                           | 17.1                    | 0.0               | 1.2        |
| Eskisehir                      | 2006-2012       | 1,491              | 0.0              | 0.0        | 0.1        | 1,490             | 0.2        | 1.3        | 1,467             | 93.7                           | 0.0                     | 0.5               | 0.3        |
| Izmir                          | 2000-2013       | 14,990             | 2.8              | 3.5        | 0.0        | 14,035            | 0.8        | 2.2        | 13,612            | 97.8                           | 6.1                     | 0.0               | 6.4        |
| Samsun                         | 2006-2012       | 1,856              | 0.0              | 3.8        | 0.1        | 1,784             | 0.5        | 0.8        | 1,760             | 97.6                           | 5.6                     | 4.3               | 0.0        |
| Trabzon                        | 2006-2012       | 1,193              | 0.8              | 4.7        | 0.0        | 1,127             | 0.3        | 0.9        | 1,114             | 90.2                           | 21.0                    | 0.0               | 0.9        |
| <b>EUROPE</b>                  |                 | <b>2,939,641</b>   | <b>0.1</b>       | <b>5.8</b> | <b>0.4</b> | <b>2,754,958</b>  | <b>1.4</b> | <b>0.6</b> | <b>2,700,348</b>  | <b>98.4</b>                    | <b>1.3</b>              | <b>1.4</b>        | <b>3.0</b> |
| Austria *                      | 2000-2014       | 84,350             | 0.0              | 7.5        | 0.2        | 77,897            | 2.7        | 1.2        | 74,818            | 99.0                           | 3.0                     | 0.0               | 0.0        |
| Belarus (Childhood) †          | -               | -                  | -                | -          | -          | -                 | -          | -          | -                 | -                              | -                       | -                 | -          |
| Belgium *                      | 2004-2014       | 123,935            | 0.0              | 9.1        | 0.0        | 112,610           | 0.0        | 0.8        | 111,685           | 99.8                           | 0.3                     | 1.2               | 0.0        |
| Bulgaria *                     | 2000-2014       | 54,830             | 0.0              | 0.0        | 0.0        | 54,830            | 2.2        | 0.0        | 53,605            | 96.0                           | 2.4                     | 0.1               | 0.0        |
| Croatia *                      | 2000-2014       | 37,318             | 0.0              | 1.7        | 0.0        | 36,671            | 3.6        | 0.0        | 35,323            | 88.7                           | 0.3                     | 0.0               | 0.0        |
| Czech Republic *               | 2000-2014       | 96,254             | 0.0              | 4.8        | 0.2        | 91,513            | 0.6        | 1.0        | 89,989            | 96.5                           | 0.4                     | 0.0               | 0.0        |
| Denmark *                      | 2000-2014       | 66,309             | 0.0              | 0.0        | 0.1        | 66,260            | 0.0        | 0.6        | 65,840            | 99.4                           | 1.3                     | 0.3               | 0.0        |
| Estonia *                      | 2000-2012       | 8,437              | 0.0              | 2.1        | 0.0        | 8,253             | 1.3        | 0.0        | 8,149             | 96.4                           | 3.4                     | 0.6               | 0.0        |
| Finland *                      | 2000-2014       | 67,103             | 0.1              | 6.6        | 0.2        | 62,493            | 0.3        | 0.0        | 62,282            | 99.6                           | 0.5                     | 0.1               | 0.0        |
| French registries              | 2000-2010       | 83,091             | 0.2              | 0.0        | 0.0        | 82,871            | 0.0        | 0.4        | 82,538            | 99.2                           | 0.3                     | 2.8               | 0.0        |
| Bas-Rhin                       | 2000-2010       | 9,095              | 0.0              | 0.0        | 0.0        | 9,095             | 0.0        | 0.4        | 9,056             | 99.3                           | 0.0                     | 1.8               | 0.0        |
| Basse Normandie                | -               | -                  | -                | -          | -          | -                 | -          | -          | -                 | -                              | -                       | -                 | -          |
| Burgundy Digestive             | -               | -                  | -                | -          | -          | -                 | -          | -          | -                 | -                              | -                       | -                 | -          |
| Calvados                       | 2000-2010       | 5,805              | 0.0              | 0.0        | 0.0        | 5,803             | 0.0        | 0.0        | 5,801             | 98.4                           | 0.2                     | 0.4               | 0.0        |
| Calvados Digestive             | -               | -                  | -                | -          | -          | -                 | -          | -          | -                 | -                              | -                       | -                 | -          |
| Côte-d'Or Gynaecologic         | 2000-2010       | 4,243              | 0.0              | 0.0        | 0.0        | 4,242             | 0.0        | 0.5        | 4,220             | 99.2                           | 0.0                     | 2.0               | 0.0        |
| Côte-d'Or Haematopoietic       | -               | -                  | -                | -          | -          | -                 | -          | -          | -                 | -                              | -                       | -                 | -          |
| Doubs                          | 2000-2010       | 3,971              | 0.0              | 0.0        | 0.1        | 3,969             | 0.0        | 0.1        | 3,965             | 99.4                           | 0.1                     | 1.6               | 0.0        |
| Finistère                      | -               | -                  | -                | -          | -          | -                 | -          | -          | -                 | -                              | -                       | -                 | -          |
| Gironde CNS                    | -               | -                  | -                | -          | -          | -                 | -          | -          | -                 | -                              | -                       | -                 | -          |
| Gironde General                | 2005-2010       | 4,691              | 2.9              | 0.0        | 0.1        | 4,552             | 0.0        | 0.1        | 4,547             | 99.3                           | 0.1                     | 9.4               | 0.0        |
| Gironde Haematopoietic         | -               | -                  | -                | -          | -          | -                 | -          | -          | -                 | -                              | -                       | -                 | -          |
| Haut-Rhin                      | 2000-2010       | 6,074              | 0.1              | 0.0        | 0.1        | 6,066             | 0.0        | 0.3        | 6,047             | 99.5                           | 0.2                     | 3.1               | 0.0        |
| Haute-Vienne                   | 2009-2009       | 320                | 0.0              | 0.0        | 0.0        | 320               | 0.0        | 0.6        | 318               | 99.7                           | 0.0                     | 3.5               | 0.0        |
| Hérault                        | 2000-2010       | 8,997              | 0.0              | 0.0        | 0.0        | 8,994             | 0.0        | 0.3        | 8,964             | 99.1                           | 0.0                     | 2.7               | 0.0        |
| Isère                          | 2000-2010       | 9,521              | 0.0              | 0.0        | 0.0        | 9,521             | 0.0        | 0.7        | 9,453             | 99.4                           | 0.1                     | 1.3               | 0.0        |
| Lille Metro                    | 2008-2010       | 1,927              | 0.0              | 0.0        | 0.0        | 1,927             | 0.0        | 0.3        | 1,922             | 99.0                           | 0.1                     | 1.5               | 0.0        |
| Loire-Atlantique               | 2000-2010       | 16,086             | 0.3              | 0.0        | 0.0        | 16,027            | 0.0        | 0.5        | 15,946            | 99.6                           | 0.4                     | 3.2               | 0.0        |
| Manche                         | 2000-2010       | 4,222              | 0.0              | 0.0        | 0.0        | 4,221             | 0.0        | 0.1        | 4,215             | 99.3                           | 0.5                     | 2.0               | 0.0        |
| Somme                          | 2000-2010       | 4,905              | 0.0              | 0.0        | 0.1        | 4,902             | 0.0        | 0.9        | 4,856             | 98.7                           | 1.5                     | 6.0               | 0.0        |
| Tarn                           | 2000-2010       | 3,234              | 0.0              | 0.0        | 0.1        | 3,232             | 0.0        | 0.1        | 3,228             | 98.6                           | 0.5                     | 1.9               | 0.0        |
| France Childhood Haem †        | -               | -                  | -                | -          | -          | -                 | -          | -          | -                 | -                              | -                       | -                 | -          |
| France Childhood Solid †       | -               | -                  | -                | -          | -          | -                 | -          | -          | -                 | -                              | -                       | -                 | -          |
| German registries              | 2000-2014       | 341,249            | 0.3              | 4.8        | 0.2        | 323,058           | 6.5        | 0.5        | 300,626           | 99.2                           | 0.2                     | 0.5               | 24.6       |
| Brandenburg                    | 2000-2014       | 29,573             | 0.0              | 7.4        | 0.2        | 27,325            | 3.0        | 0.0        | 26,493            | 99.1                           | 0.1                     | 0.0               | 32.0       |
| Bremen                         | 2000-2013       | 8,946              | 0.0              | 7.5        | 0.3        | 8,249             | 4.6        | 0.8        | 7,803             | 98.8                           | 0.2                     | 4.7               | 0.0        |
| Hamburg                        | 2000-2013       | 21,116             | 0.0              | 0.0        | 0.0        | 21,113            | 4.3        | 0.5        | 20,097            | 99.7                           | 0.4                     | 6.0               | 0.0        |
| Lower Saxony                   | 2003-2013       | 81,516             | 1.4              | 0.0        | 0.2        | 80,206            | 9.0        | 0.8        | 72,334            | 99.9                           | 0.1                     | 0.0               | 33.4       |
| Mecklenburg-W. Pomerania       | 2000-2014       | 19,187             | 0.0              | 7.7        | 0.1        | 17,685            | 3.3        | 0.1        | 17,095            | 99.0                           | 0.2                     | 0.0               | 31.7       |
| Rhineland Palatinate           | 2000-2013       | 51,176             | 0.0              | 6.0        | 0.3        | 47,929            | 9.6        | 0.7        | 43,007            | 98.3                           | 0.0                     | 0.0               | 35.3       |
| Saarland                       | 2000-2012       | 11,827             | 0.0              | 5.4        | 0.1        | 11,170            | 1.8        | 0.8        | 10,872            | 99.6                           | 0.5                     | 0.0               | 0.0        |
| Saxony                         | 2000-2014       | 51,131             | 0.0              | 7.1        | 0.2        | 47,389            | 2.7        | 0.0        | 46,088            | 98.7                           | 0.3                     | 0.0               | 29.4       |
| Schleswig-Holstein             | 2000-2012       | 40,134             | 0.0              | 6.9        | 0.3        | 37,251            | 10.4       | 0.8        | 33,076            | 99.8                           | 0.3                     | 0.0               | 0.0        |
| Thuringia                      | 2000-2014       | 26,643             | 0.0              | 7.0        | 0.1        | 24,741            | 3.9        | 0.0        | 23,761            | 99.1                           | 0.1                     | 0.0               | 30.4       |
| Gibraltar *                    | 2000-2010       | 201                | 10.9             | 3.5        | 1.0        | 170               | 0.0        | 0.6        | 169               | 99.4                           | 1.2                     | 0.0               | 54.4       |
| Greece (National Paediatric) † | -               | -                  | -                | -          | -          | -                 | -          | -          | -                 | -                              | -                       | -                 | -          |
| Iceland *                      | 2000-2014       | 2,958              | 0.0              | 7.1        | 0.0        | 2,747             | 0.1        | 0.0        | 2,743             | 99.4                           | 0.6                     | 0.0               | 0.0        |
| Ireland *                      | 2000-2013       | 38,273             | 0.0              | 8.6        | 0.4        | 34,827            | 0.5        | 0.1        | 34,632            | 99.0                           | 0.4                     | 0.0               | 0.0        |
| Italian registries             | 2000-2014       | 261,171            | 0.0              | 2.8        | 0.2        | 253,377           | 0.3        | 0.9        | 250,204           | 96.7                           | 4.8                     | 1.0               | 1.0        |
| Alto Adige                     | 2000-2010       | 3,424              | 0.0              | 0.0        | 0.0        | 3,423             | 0.6        | 1.0        | 3,369             | 98.5                           | 1.7                     | 0.0               | 0.0        |
| Barletta-Andria-Trani          | 2006-2012       | 1,690              | 0.0              | 0.0        | 0.1        | 1,689             | 0.6        | 1.2        | 1,659             | 97.7                           | 2.9                     | 1.0               | 0.0        |
| Basilicata                     | 2006-2010       | 1,599              | 0.0              | 0.0        | 0.0        | 1,599             | 0.0        | 1.3        | 1,578             | 91.8                           | 9.1                     | 0.2               | 0.4        |
| Bergamo                        | 2007-2012       | 5,154              | 0.0              | 0.0        | 0.0        | 5,154             | 0.0        | 1.2        | 5,092             | 97.9                           | 2.3                     | 0.9               | 0.0        |
| Biella-Vercelli                | 2000-2010       | 2,789              | 0.0              | 4.9        | 0.3        | 2,644             | 1.3        | 0.9        | 2,584             | 97.0                           | 4.0                     | 0.3               | 0.7        |
| Brescia                        | 2000-2008       | 8,676              | 0.0              | 0.0        | 0.0        | 8,675             | 0.0        | 0.9        | 8,600             | 89.1                           | 13.7                    | 0.7               | 0.1        |
| Brindisi                       | 2006-2008       | 854                | 0.0              | 0.0        | 0.0        | 854               | 0.0        | 1.4        | 842               | 96.6                           | 3.8                     | 0.2               | 3.8        |
| Caserta                        | 2008-2010       | 1,439              | 0.0              | 0.0        | 0.0        | 1,439             | 0.0        | 0.7        | 1,429             | 97.8                           | 2.7                     | 0.5               | 9.0        |
| Catania-Messina-Enna           | 2003-2012       | 12,509             | 0.0              | 0.0        | 0.0        | 12,504            | 1.0        | 0.9        | 12,272            | 97.5                           | 9.4                     | 0.0               | 1.9        |
| Catanzaro                      | 2003-2009       | 1,114              | 0.0              | 0.0        | 0.1        | 1,113             | 0.0        | 0.9        | 1,103             | 96.4                           | 4.1                     | 0.2               | 0.3        |
| Como                           | 2003-2011       | 4,576              | 0.0              | 0.0        | 0.0        | 4,575             | 0.0        | 0.7        | 4,541             | 97.7                           | 3.1                     | 0.8               | 0.0        |
| Cremona                        | 2005-2010       | 1,991              | 0.0              | 0.0        | 0.1        | 1,989             | 0.3        | 0.7        | 1,970             | 97.2                           | 3.6                     | 0.8               | 0.0        |
| Ferrara                        | 2000-2011       | 4,606              | 0.0              | 0.0        | 0.0        | 4,605             | 0.0        | 1.0        | 4,559             | 97.9                           | 2.4                     | 1.3               | 0.0        |
| Friuli-Venezia-Giulia          | 2000-2010       | 13,436             | 0.0              | 0.0        | 0.1        | 13,427            | 0.4        | 1.0        | 13,240            | 97.8                           | 2.7                     | 0.5               | 0.0        |
| Genoa                          | 2000-2009       | 10,113             | 0.0              | 7.3        | 1.3        | 9,245             | 0.0        | 0.9        | 9,165             | 96.1                           | 4.1                     | 0.0               | 0.0        |
| Latina                         | 2000-2011       | 3,764              | 0.0              | 0.0        | 0.0        | 3,764             | 0.0        | 1.1        | 3,722             | 93.2                           | 7.3                     | 1.9               | 2.6        |
| Lecce                          | 2003-2008       | 3,061              | 0.0              | 0.0        | 0.0        | 3,060             | 0.0        | 0.9        | 3,032             | 94.3                           | 6.4                     | 0.3               | 1.8        |

Web-table 2.9: Data quality indicators, women diagnosed during 2000-2014, by continent, country and registry: BREAST (WOMEN)

|                      | Calendar period | Patients submitted | Ineligible (%) ¶ |         |       | Excluded (%) ¶¶   |     |       | Data quality indicators (%) †† |       |                         |                   |          |
|----------------------|-----------------|--------------------|------------------|---------|-------|-------------------|-----|-------|--------------------------------|-------|-------------------------|-------------------|----------|
|                      |                 |                    | Incomplete dates | In situ | Other | Eligible patients | DCO | Other | Patients included              | MV    | Non-specific morphology | Lost to follow-up | Censored |
| Mantova              | 2000-2010       | 4,119              | 0.0              | 0.0     | 0.1   | 4,115             | 0.4 | 0.9   | 4,062                          | 94.8  | 11.9                    | 0.1               | 0.0      |
| Milano               | 2000-2012       | 22,294             | 0.0              | 0.0     | 0.0   | 22,282            | 0.0 | 0.9   | 22,073                         | 96.6  | 4.4                     | 4.5               | 0.3      |
| Modena               | 2000-2012       | 9,110              | 0.0              | 14.3    | 0.1   | 7,794             | 0.0 | 0.6   | 7,746                          | 98.9  | 1.4                     | 0.0               | 1.3      |
| Monza-Brianza        | 2007-2012       | 4,463              | 0.0              | 0.0     | 0.0   | 4,463             | 0.0 | 1.0   | 4,417                          | 97.1  | 4.0                     | 0.5               | 0.0      |
| Naples               | 2000-2012       | 5,346              | 0.0              | 0.0     | 0.0   | 5,345             | 0.0 | 0.8   | 5,301                          | 97.4  | 3.0                     | 1.7               | 2.4      |
| Nuoro                | 2003-2012       | 1,448              | 0.0              | 0.0     | 0.0   | 1,448             | 1.0 | 1.1   | 1,417                          | 97.7  | 3.2                     | 0.1               | 0.0      |
| Palermo              | 2003-2012       | 7,522              | 0.0              | 0.0     | 0.0   | 7,521             | 1.5 | 0.9   | 7,341                          | 97.5  | 2.7                     | 0.3               | 0.0      |
| Parma                | 2000-2014       | 6,791              | 0.0              | 11.4    | 0.5   | 5,985             | 0.6 | 0.9   | 5,894                          | 99.3  | 2.5                     | 1.8               | 0.1      |
| Pavia                | 2003-2009       | 3,723              | 0.0              | 0.1     | 0.1   | 3,717             | 0.0 | 1.0   | 3,678                          | 93.4  | 8.8                     | 1.1               | 0.5      |
| Piacenza             | 2006-2011       | 1,630              | 0.0              | 0.0     | 0.0   | 1,630             | 0.0 | 0.9   | 1,615                          | 97.8  | 2.5                     | 2.1               | 1.2      |
| Ragusa               | 2000-2012       | 3,425              | 0.0              | 4.5     | 0.5   | 3,254             | 1.2 | 1.0   | 3,185                          | 95.8  | 7.8                     | 0.6               | 0.0      |
| Reggio Emilia        | 2000-2012       | 5,696              | 0.0              | 0.0     | 0.0   | 5,694             | 0.0 | 0.8   | 5,651                          | 98.0  | 8.9                     | 1.4               | 0.0      |
| Romagna              | 2000-2012       | 15,101             | 0.0              | 11.8    | 0.0   | 13,316            | 0.0 | 0.8   | 13,204                         | 97.4  | 2.9                     | 0.1               | 0.0      |
| Salerno              | 2000-2009       | 5,514              | 0.0              | 0.0     | 0.0   | 5,514             | 0.0 | 1.2   | 5,447                          | 88.8  | 12.0                    | 0.3               | 2.9      |
| Sassari              | 2000-2011       | 4,144              | 0.0              | 0.0     | 0.0   | 4,143             | 1.0 | 1.2   | 4,050                          | 97.5  | 5.8                     | 0.0               | 0.0      |
| Siracusa             | 2000-2012       | 3,054              | 0.0              | 0.0     | 0.0   | 3,053             | 1.6 | 1.2   | 2,967                          | 97.8  | 3.6                     | 0.0               | 1.1      |
| Sondrio              | 2000-2011       | 1,686              | 0.0              | 0.0     | 0.0   | 1,686             | 0.0 | 0.7   | 1,675                          | 96.3  | 4.8                     | 0.6               | 0.2      |
| Taranto              | 2006-2012       | 2,883              | 0.0              | 0.0     | 0.0   | 2,882             | 1.1 | 1.1   | 2,819                          | 98.4  | 2.2                     | 2.6               | 0.0      |
| Trapani              | 2002-2010       | 2,204              | 0.0              | 0.0     | 0.0   | 2,204             | 0.5 | 1.2   | 2,167                          | 95.5  | 8.9                     | 1.0               | 0.7      |
| Trento               | 2000-2010       | 4,207              | 0.0              | 0.0     | 0.0   | 4,206             | 0.5 | 1.0   | 4,146                          | 97.9  | 2.8                     | 1.2               | 0.0      |
| Turin                | 2000-2012       | 12,294             | 0.0              | 10.0    | 0.2   | 11,036            | 0.8 | 1.0   | 10,833                         | 98.1  | 2.7                     | 2.7               | 0.0      |
| Tuscany              | 2000-2009       | 11,930             | 0.0              | 9.2     | 2.4   | 10,551            | 0.3 | 1.1   | 10,400                         | 96.8  | 3.7                     | 0.0               | 2.3      |
| Umbria               | 2000-2013       | 9,951              | 0.0              | 0.0     | 0.0   | 9,949             | 0.1 | 1.1   | 9,828                          | 96.7  | 3.8                     | 0.4               | 0.3      |
| Varese               | 2000-2012       | 9,735              | 0.0              | 0.0     | 0.0   | 9,730             | 0.0 | 0.9   | 9,645                          | 96.6  | 3.6                     | 0.9               | 0.1      |
| Veneto               | 2000-2009       | 20,796             | 0.0              | 0.0     | 0.0   | 20,790            | 0.0 | 0.9   | 20,600                         | 97.9  | 4.3                     | 0.9               | 2.8      |
| Viterbo              | 2006-2010       | 1,310              | 0.0              | 0.0     | 0.0   | 1,310             | 0.8 | 1.0   | 1,286                          | 94.8  | 6.1                     | 0.0               | 47.0     |
| Piedmont Childhood   | -               | -                  | -                | -       | -     | -                 | -   | -     | -                              | -     | -                       | -                 | -        |
| Latvia *             | 2000-2014       | 15,536             | 0.0              | 0.3     | 15.1  | 13,133            | 0.0 | 0.9   | 13,020                         | 100.0 | 1.0                     | 0.0               | 0.0      |
| Lithuania *          | 2000-2012       | 18,860             | 0.0              | 3.1     | 0.1   | 18,267            | 2.2 | 1.0   | 17,699                         | 93.3  | 5.2                     | 0.0               | 0.2      |
| Malta *              | 2000-2013       | 3,826              | 0.0              | 5.4     | 1.4   | 3,567             | 1.1 | 0.1   | 3,523                          | 98.1  | 2.6                     | 0.0               | 0.0      |
| Netherlands *        | 2000-2014       | 221,927            | 0.0              | 9.7     | 0.1   | 200,039           | 0.0 | 1.0   | 198,074                        | 99.7  | 0.3                     | 0.7               | 0.0      |
| Norway *             | 2000-2014       | 50,315             | 0.0              | 8.4     | 5.4   | 43,378            | 0.0 | 0.0   | 43,349                         | 100.0 | 0.1                     | 0.3               | 0.0      |
| Poland *             | 2000-2014       | 223,729            | 0.0              | 0.3     | 0.0   | 222,996           | 0.9 | 0.5   | 220,036                        | 96.5  | 0.6                     | 0.0               | 0.0      |
| Greater Poland       | 2000-2014       | 21,495             | 0.0              | 0.0     | 0.0   | 21,495            | 1.5 | 0.3   | 21,104                         | 98.8  | 0.1                     | 0.0               | 0.0      |
| Holy Cross           | 2000-2014       | 6,739              | 0.0              | 0.0     | 0.0   | 6,739             | 1.3 | 0.8   | 6,597                          | 97.2  | 0.2                     | 0.0               | 0.0      |
| Kujavia-Pomerania    | 2000-2014       | 13,108             | 0.0              | 0.0     | 0.0   | 13,108            | 0.5 | 0.3   | 13,010                         | 98.5  | 0.0                     | 0.0               | 0.0      |
| Lesser Poland        | 2000-2014       | 18,024             | 0.0              | 0.0     | 0.0   | 18,024            | 1.3 | 0.3   | 17,739                         | 97.9  | 3.6                     | 0.0               | 0.0      |
| Łódź                 | 2000-2014       | 16,252             | 0.0              | 0.0     | 0.0   | 16,252            | 0.4 | 1.1   | 16,004                         | 91.4  | 0.1                     | 0.0               | 0.0      |
| Lower Silesia        | 2000-2014       | 19,488             | 0.0              | 3.7     | 0.0   | 18,759            | 0.2 | 0.9   | 18,559                         | 94.5  | 1.4                     | 0.5               | 0.0      |
| Lublin               | 2000-2014       | 11,498             | 0.0              | 0.0     | 0.0   | 11,498            | 2.0 | 0.2   | 11,251                         | 96.6  | 0.1                     | 0.0               | 0.0      |
| Lubush               | 2000-2014       | 5,560              | 0.0              | 0.0     | 0.0   | 5,560             | 0.6 | 0.3   | 5,508                          | 99.1  | 0.1                     | 0.0               | 0.0      |
| Mazovia              | 2000-2014       | 31,368             | 0.0              | 0.0     | 0.0   | 31,367            | 0.0 | 0.1   | 31,330                         | 94.1  | 0.6                     | 0.0               | 0.0      |
| Opole                | 2000-2014       | 5,586              | 0.0              | 0.0     | 0.0   | 5,586             | 0.0 | 0.5   | 5,557                          | 99.7  | 0.1                     | 0.0               | 0.0      |
| Podlaha              | 2000-2014       | 5,916              | 0.0              | 0.0     | 0.0   | 5,916             | 1.6 | 0.4   | 5,793                          | 96.1  | 1.3                     | 0.0               | 0.0      |
| Pomerania            | 2000-2014       | 13,960             | 0.0              | 0.0     | 0.0   | 13,960            | 2.6 | 0.3   | 13,557                         | 98.7  | 0.0                     | 0.0               | 0.0      |
| Silesia              | 2000-2014       | 27,262             | 0.0              | 0.0     | 0.0   | 27,259            | 0.5 | 0.4   | 26,998                         | 97.5  | 0.1                     | 0.0               | 0.0      |
| Subcarpathia         | 2000-2014       | 9,387              | 0.0              | 0.0     | 0.0   | 9,387             | 1.4 | 1.2   | 9,142                          | 98.5  | 0.1                     | 0.0               | 0.0      |
| Varmia-Mazuria       | 2000-2014       | 7,574              | 0.0              | 0.0     | 0.0   | 7,574             | 0.1 | 0.2   | 7,550                          | 98.0  | 0.8                     | 0.0               | 0.3      |
| West Pomerania       | 2000-2014       | 10,512             | 0.0              | 0.0     | 0.0   | 10,512            | 1.2 | 0.5   | 10,337                         | 93.4  | 0.1                     | 0.0               | 0.0      |
| Portugal *           | 2000-2014       | 73,407             | 0.3              | 4.4     | 0.4   | 69,678            | 0.0 | 0.1   | 69,599                         | 99.0  | 0.9                     | 2.5               | 0.0      |
| Azores               | 2000-2014       | 1,557              | 0.0              | 0.0     | 0.0   | 1,557             | 1.7 | 0.1   | 1,529                          | 98.8  | 1.2                     | 0.2               | 0.6      |
| Portugal Central     | 2003-2010       | 8,370              | 0.1              | 0.0     | 0.0   | 8,360             | 0.0 | 0.4   | 8,323                          | 98.7  | 1.8                     | 0.3               | 0.0      |
| Portugal North       | 2000-2010       | 16,729             | 1.1              | 0.0     | 0.1   | 16,527            | 0.0 | 0.0   | 16,527                         | 99.2  | 1.2                     | 0.0               | 0.0      |
| Portugal South       | 2000-2014       | 46,751             | 0.0              | 7.0     | 0.6   | 43,234            | 0.0 | 0.0   | 43,220                         | 99.0  | 0.5                     | 3.9               | 0.0      |
| Romania (Cluj)       | 2006-2012       | 2,445              | 0.0              | 3.2     | 0.6   | 2,352             | 5.4 | 0.9   | 2,205                          | 94.1  | 6.3                     | 0.0               | 0.0      |
| Russian registries ‡ | 2000-2014       | 42,423             | 0.0              | 0.2     | 0.1   | 42,323            | 0.2 | 0.8   | 41,903                         | 94.3  | 5.7                     | 2.5               | 2.7      |
| Arkhangelsk          | 2000-2014       | 6,063              | 0.0              | 0.2     | 0.0   | 6,049             | 0.2 | 1.0   | 5,978                          | 95.1  | 2.3                     | 2.2               | 0.0      |
| Karelia              | 2000-2014       | 4,013              | 0.0              | 0.4     | 0.7   | 3,968             | 0.4 | 0.7   | 3,927                          | 95.2  | 2.5                     | 1.2               | 3.6      |
| Omsk                 | 2000-2014       | 7,752              | 0.0              | 0.0     | 0.0   | 7,750             | 0.0 | 0.1   | 7,739                          | 99.7  | 1.9                     | 4.7               | 11.4     |
| Samara               | 2000-2014       | 20,876             | 0.0              | 0.1     | 0.0   | 20,862            | 0.2 | 1.0   | 20,620                         | 91.4  | 9.7                     | 2.1               | 0.0      |
| Tomsk                | 2005-2014       | 3,719              | 0.0              | 0.7     | 0.0   | 3,694             | 0.0 | 1.5   | 3,639                          | 97.0  | 0.1                     | 2.4               | 3.3      |
| Slovakia *           | 2000-2010       | 25,793             | 0.0              | 3.2     | 0.2   | 24,903            | 3.9 | 1.0   | 23,698                         | 97.9  | 2.6                     | 0.0               | 0.0      |
| Slovenia *           | 2000-2013       | 17,138             | 0.0              | 6.7     | 0.2   | 15,958            | 0.9 | 0.0   | 15,822                         | 98.3  | 0.1                     | 0.0               | 0.0      |
| Spanish registries   | 2000-2013       | 62,316             | 0.3              | 7.4     | 0.2   | 57,409            | 0.8 | 0.4   | 56,759                         | 98.6  | 0.6                     | 0.7               | 0.0      |
| Basque Country       | 2000-2013       | 20,039             | 0.0              | 10.6    | 0.2   | 17,881            | 0.6 | 0.2   | 17,753                         | 98.5  | 0.1                     | 0.6               | 0.0      |
| Canaries             | 2000-2011       | 10,016             | 0.0              | 8.1     | 0.1   | 9,197             | 0.7 | 0.0   | 9,132                          | 99.1  | 0.2                     | 0.1               | 0.0      |
| Girona               | 2000-2013       | 6,116              | 1.4              | 8.7     | 0.9   | 5,441             | 1.2 | 1.0   | 5,322                          | 98.6  | 2.1                     | 1.4               | 0.0      |
| Granada              | 2000-2012       | 5,123              | 0.0              | 0.0     | 0.2   | 5,115             | 0.9 | 0.0   | 5,067                          | 98.2  | 0.1                     | 0.2               | 0.0      |
| Mallorca             | 2000-2012       | 5,381              | 0.9              | 7.2     | 0.4   | 4,925             | 0.7 | 1.1   | 4,838                          | 98.6  | 0.6                     | 3.6               | 0.0      |
| Murcia               | 2000-2010       | 6,502              | 0.0              | 0.0     | 0.1   | 6,496             | 1.0 | 1.0   | 6,361                          | 98.5  | 1.9                     | 0.0               | 0.0      |
| Navarra              | 2000-2010       | 4,069              | 0.0              | 11.5    | 0.0   | 3,598             | 0.6 | 0.0   | 3,576                          | 98.6  | 0.3                     | 0.4               | 0.0      |
| Tarragona            | 2000-2011       | 5,070              | 0.9              | 5.2     | 0.1   | 4,756             | 0.9 | 0.1   | 4,710                          | 98.4  | 0.8                     | 0.0               | 0.0      |
| Spain Childhood      | -               | -                  | -                | -       | -     | -                 | -   | -     | -                              | -     | -                       | -                 | -        |
| Valencia Childhood   | -               | -                  | -                | -       | -     | -                 | -   | -     | -                              | -     | -                       | -                 | -        |
| Sweden *             | 2000-2014       | 112,791            | 0.0              | 8.2     | 0.3   | 103,218           | 0.1 | 0.6   | 102,483                        | 99.9  | 0.3                     | 0.2               | 0.0      |
| Swiss registries     | 2000-2014       | 43,418             | 0.0              | 7.5     | 1.0   | 39,732            | 0.6 | 0.6   | 39,262                         | 99.1  | 0.5                     | 6.4               | 5.5      |
| Basel                | 2000-2011       | 2,484              | 0.0              | 0.0     | 0.3   | 2,477             | 0.1 | 2.9   | 2,401                          | 100.0 | 0.0                     | 0.7               | 16.6     |
| Fribourg             | 2006-2014       | 1,985              | 0.0              | 8.6     | 0.5   | 1,806             | 0.0 | 0.6   | 1,796                          | 99.3  | 0.8                     | 3.7               | 0.0      |
| Geneva               | 2000-2013       | 5,856              | 0.0              | 9.6     | 0.4   | 5,267             | 0.4 | 0.6   | 5,212                          | 99.0  | 1.1                     | 8.3               | 0.0      |
| Graubünden-Glarus    | 2000-2014       | 2,479              | 0.0              | 7.3     | 0.2   | 2,293             | 0.0 | 0.0   | 2,292                          | 98.3  | 0.0                     | 61.4              | 0.0      |
| Neuchâtel            | 2000-2014       | 2,579              | 0.0              | 6.3     | 13.9  | 2,059             | 0.2 | 0.0   | 2,054                          | 99.0  | 0.2                     | 4.2               | 3.6      |
| St Gallen-Appenzell  | 2000-2014       | 5,110              | 0.0              | 7.1     | 0.2   | 4,736             | 0.4 | 0.0   | 4,718                          | 98.5  | 0.0                     | 3.6               | 0.0      |
| Ticino               | 2000-2014       | 4,569              | 0.0              | 7.9     | 0.0   | 4,208             | 0.3 | 0.6   | 4,168                          | 99.5  | 0.5                     | 2.2               | 0.0      |
| Valais               | 2000-2014       | 3,671              | 0.0              | 8.2     | 0.1   | 3,365             | 0.1 | 0.0   | 3,363                          | 98.8  | 0.0                     | 1.9               | 0.1      |

Web-table 2.9: Data quality indicators, women diagnosed during 2000-2014, by continent, country and registry: BREAST (WOMEN)

|                              | Calendar period | Patients submitted | Ineligible (%) ¶ |             |            | Eligible patients | Excluded (%) ¶¶ |            | Patients included | Data quality indicators (%) †† |                         |                   |            |
|------------------------------|-----------------|--------------------|------------------|-------------|------------|-------------------|-----------------|------------|-------------------|--------------------------------|-------------------------|-------------------|------------|
|                              |                 |                    | Incomplete dates | In situ     | Other      |                   | DCO             | Other      |                   | MV                             | Non-specific morphology | Lost to follow-up | Censored   |
| Zürich                       | 2000-2013       | 14,685             | 0.0              | 7.8         | 0.1        | 13,521            | 1.4             | 0.6        | 13,258            | 99.3                           | 0.8                     | 1.2               | 12.8       |
| Switzerland (Childhood) †    | -               | -                  |                  |             |            |                   |                 |            |                   |                                |                         |                   |            |
| United Kingdom *             | 2000-2014       | 760,238            | 0.1              | 8.7         | 0.3        | 690,428           | 0.8             | 0.7        | 680,313           | 99.1                           | 1.1                     | 3.3               | 0.0        |
| England                      | 2000-2014       | 635,932            | 0.1              | 8.8         | 0.3        | 576,993           | 0.8             | 0.8        | 567,858           | 99.2                           | 1.1                     | 4.0               | 0.0        |
| Northern Ireland             | 2000-2014       | 18,592             | 0.1              | 8.2         | 1.7        | 16,741            | 0.3             | 0.6        | 16,592            | 98.7                           | 2.8                     | 0.0               | 0.0        |
| Scotland                     | 2000-2014       | 65,525             | 0.0              | 7.8         | 0.5        | 60,097            | 0.2             | 0.0        | 59,967            | 98.2                           | 0.4                     | 0.2               | 0.0        |
| Wales                        | 2000-2014       | 40,189             | 0.0              | 8.6         | 0.3        | 36,597            | 1.3             | 0.6        | 35,896            | 98.8                           | 1.5                     | 0.0               | 0.0        |
| <b>OCEANIA</b>               |                 | <b>249,346</b>     | <b>0.2</b>       | <b>5.4</b>  | <b>0.2</b> | <b>234,866</b>    | <b>0.7</b>      | <b>0.4</b> | <b>232,346</b>    | <b>99.2</b>                    | <b>1.0</b>              | <b>0.0</b>        | <b>0.0</b> |
| Australia *                  | 2000-2014       | 209,559            | 0.2              | 6.4         | 0.2        | 195,079           | 0.7             | 0.3        | 193,134           | 99.2                           | 1.0                     | 0.0               | 0.0        |
| Australian Capital Territory | 2000-2013       | 3,515              | 0.0              | 11.5        | 0.9        | 3,082             | 0.3             | 0.6        | 3,053             | 99.7                           | 0.5                     | 0.0               | 0.2        |
| New South Wales              | 2000-2012       | 56,166             | 0.1              | 0.0         | 0.2        | 56,027            | 0.6             | 0.5        | 55,431            | 99.7                           | 0.5                     | 0.0               | 0.0        |
| Northern Territory           | 2000-2013       | 1,028              | 0.0              | 0.0         | 0.0        | 1,028             | 0.1             | 0.1        | 1,026             | 99.2                           | 1.6                     | 0.0               | 0.0        |
| Queensland                   | 2000-2014       | 50,144             | 0.9              | 12.3        | 0.7        | 43,177            | 0.6             | 0.0        | 42,903            | 99.0                           | 1.2                     | 0.0               | 0.0        |
| South Australia              | 2000-2013       | 15,519             | 0.1              | 0.0         | 0.0        | 15,503            | 0.1             | 0.8        | 15,360            | 98.3                           | 2.1                     | 0.0               | 0.0        |
| Tasmania                     | 2000-2013       | 5,274              | 0.0              | 9.3         | 0.2        | 4,774             | 0.7             | 0.9        | 4,697             | 99.1                           | 1.0                     | 0.0               | 0.0        |
| Victoria                     | 2000-2014       | 58,312             | 0.0              | 11.0        | 0.0        | 51,892            | 1.2             | 0.3        | 51,126            | 99.1                           | 0.9                     | 0.0               | 0.0        |
| Western Australia            | 2000-2014       | 19,601             | 0.0              | 0.0         | 0.0        | 19,596            | 0.2             | 0.1        | 19,538            | 99.3                           | 0.9                     | 0.0               | 0.0        |
| New Zealand *                | 2000-2014       | 39,787             | 0.0              | 0.0         | 0.0        | 39,787            | 0.9             | 0.5        | 39,212            | 98.9                           | 1.4                     | 0.0               | 0.0        |
| <b>Total</b>                 |                 | <b>7,379,194</b>   | <b>0.6</b>       | <b>10.6</b> | <b>0.3</b> | <b>6,533,114</b>  | <b>1.2</b>      | <b>0.5</b> | <b>6,422,553</b>  | <b>98.6</b>                    | <b>1.6</b>              | <b>1.9</b>        | <b>1.6</b> |

Web-table 2.10: Data quality indicators, women diagnosed during 2000-2014, by continent, country and registry: CERVIX

|                                    | Calendar period | Patients submitted | Ineligible (%) ¶ |             |            | Excluded (%) ¶¶   |            |            | Data quality indicators (%) †† |             |                         |                   |             |
|------------------------------------|-----------------|--------------------|------------------|-------------|------------|-------------------|------------|------------|--------------------------------|-------------|-------------------------|-------------------|-------------|
|                                    |                 |                    | Incomplete dates | In situ     | Other      | Eligible patients | DCO        | Other      | Patients included              | MV          | Non-specific morphology | Lost to follow-up | Censored    |
| <b>AFRICA</b>                      |                 | <b>6,419</b>       | <b>18.7</b>      | <b>2.2</b>  | <b>0.1</b> | <b>5,072</b>      | <b>0.4</b> | <b>0.7</b> | <b>5,017</b>                   | <b>87.4</b> | <b>15.3</b>             | <b>8.2</b>        | <b>48.9</b> |
| Algerian registries                | 2000-2014       | 988                | 8.7              | 0.1         | 0.0        | 901               | 1.0        | 0.8        | 885                            | 99.2        | 10.2                    | 0.0               | 20.1        |
| Annaba                             | 2000-2014       | 143                | 32.2             | 0.7         | 0.0        | 96                | 3.1        | 2.1        | 91                             | 93.4        | 0.0                     | 0.0               | 89.0        |
| Sétif                              | 2000-2010       | 472                | 8.5              | 0.0         | 0.0        | 432               | 0.0        | 0.7        | 429                            | 99.8        | 8.9                     | 0.0               | 22.4        |
| Tlemcen                            | 2006-2014       | 373                | 0.0              | 0.0         | 0.0        | 373               | 1.6        | 0.5        | 365                            | 100.0       | 14.2                    | 0.0               | 0.3         |
| Mali (Bamako)                      | -               | -                  | -                | -           | -          | -                 | -          | -          | -                              | -           | -                       | -                 | -           |
| Mauritius *                        | 2005-2009       | 443                | 0.0              | 0.0         | 0.0        | 443               | 0.0        | 1.6        | 436                            | 98.9        | 12.4                    | 0.0               | 0.0         |
| Morocco (Casablanca)               | -               | -                  | -                | -           | -          | -                 | -          | -          | -                              | -           | -                       | -                 | -           |
| Nigeria (Ibadan)                   | 2005-2014       | 2,867              | 38.9             | 4.9         | 0.1        | 1,609             | 0.7        | 1.2        | 1,578                          | 100.0       | 0.0                     | 0.0               | 84.9        |
| South Africa (Eastern Cape)        | 2000-2014       | 2,121              | 0.0              | 0.0         | 0.0        | 2,119             | 0.0        | 0.0        | 2,118                          | 70.8        | 29.6                    | 19.5              | 44.1        |
| <b>AMERICA (Central and South)</b> |                 | <b>70,296</b>      | <b>2.4</b>       | <b>23.6</b> | <b>0.1</b> | <b>51,997</b>     | <b>4.2</b> | <b>1.4</b> | <b>49,067</b>                  | <b>97.2</b> | <b>3.1</b>              | <b>0.1</b>        | <b>3.4</b>  |
| Argentinian registries             | 2002-2013       | 3,382              | 1.4              | 24.3        | 0.0        | 2,513             | 1.5        | 0.3        | 2,467                          | 98.9        | 3.2                     | 0.0               | 0.0         |
| Chubut                             | 2008-2013       | 271                | 17.0             | 12.5        | 0.0        | 191               | 1.6        | 1.0        | 186                            | 94.1        | 10.8                    | 0.0               | 0.0         |
| Córdoba                            | 2004-2012       | 1,686              | 0.1              | 46.7        | 0.0        | 897               | 0.0        | 0.2        | 895                            | 99.3        | 3.4                     | 0.0               | 0.1         |
| Mendoza                            | 2003-2013       | 1,425              | 0.0              | 0.0         | 0.0        | 1,425             | 2.5        | 0.3        | 1,386                          | 99.3        | 2.0                     | 0.0               | 0.0         |
| Tierra del Fuego                   | -               | -                  | -                | -           | -          | -                 | -          | -          | -                              | -           | -                       | -                 | -           |
| Argentina (Childhood) †            | -               | -                  | -                | -           | -          | -                 | -          | -          | -                              | -           | -                       | -                 | -           |
| Brazilian registries               | 2000-2014       | 6,039              | 2.6              | 41.6        | 0.0        | 3,364             | 4.6        | 3.7        | 3,083                          | 98.8        | 2.2                     | 0.0               | 0.1         |
| Aracaju                            | 2000-2012       | 2,102              | 2.5              | 65.6        | 0.0        | 672               | 2.1        | 0.0        | 658                            | 97.9        | 2.4                     | 0.0               | 0.0         |
| Cuiabá                             | 2000-2009       | 1,918              | 5.2              | 47.5        | 0.1        | 906               | 4.4        | 13.5       | 744                            | 98.8        | 4.3                     | 0.0               | 0.0         |
| Curitiba                           | 2000-2012       | 1,684              | 0.0              | 0.0         | 0.1        | 1,682             | 6.1        | 0.2        | 1,577                          | 99.1        | 1.1                     | 0.0               | 0.0         |
| Goiânia                            | -               | -                  | -                | -           | -          | -                 | -          | -          | -                              | -           | -                       | -                 | -           |
| Juá                                | 2000-2014       | 335                | 2.4              | 66.6        | 0.0        | 104               | 0.0        | 0.0        | 104                            | 99.0        | 1.0                     | 0.0               | 2.9         |
| São Paulo                          | -               | -                  | -                | -           | -          | -                 | -          | -          | -                              | -           | -                       | -                 | -           |
| Chilean registries                 | 2000-2012       | 1,818              | 0.0              | 11.7        | 0.1        | 1,604             | 2.5        | 0.0        | 1,564                          | 95.3        | 4.5                     | 0.0               | 19.3        |
| Antofagasta                        | 2003-2010       | 498                | 0.0              | 42.6        | 0.0        | 286               | 6.6        | 0.0        | 267                            | 92.9        | 8.2                     | 0.0               | 23.2        |
| Biobío                             | 2003-2012       | 360                | 0.0              | 0.0         | 0.0        | 360               | 1.4        | 0.0        | 355                            | 96.1        | 4.8                     | 0.0               | 8.5         |
| Concepción                         | 2006-2010       | 486                | 0.0              | 0.0         | 0.0        | 486               | 2.3        | 0.0        | 475                            | 94.3        | 6.1                     | 0.0               | 25.9        |
| Los Ríos                           | 2000-2012       | 474                | 0.0              | 0.0         | 0.4        | 472               | 1.1        | 0.0        | 467                            | 97.0        | 0.4                     | 0.0               | 18.6        |
| Colombian registries               | 2000-2014       | 6,325              | 3.5              | 12.9        | 0.1        | 5,278             | 2.5        | 0.4        | 5,124                          | 95.3        | 5.2                     | 0.0               | 19.5        |
| Bucaramanga                        | 2003-2013       | 959                | 0.5              | 0.0         | 0.4        | 950               | 3.6        | 1.6        | 901                            | 96.6        | 4.8                     | 0.0               | 0.3         |
| Cali                               | 2000-2014       | 3,379              | 2.4              | 0.0         | 0.1        | 3,295             | 2.1        | 0.1        | 3,221                          | 94.9        | 5.2                     | 0.0               | 26.9        |
| Manizales                          | 2003-2012       | 509                | 19.8             | 0.0         | 0.0        | 408               | 0.2        | 1.0        | 403                            | 93.3        | 7.7                     | 0.0               | 32.0        |
| Pasto                              | 2000-2012       | 1,478              | 2.5              | 55.1        | 0.1        | 625               | 4.2        | 0.0        | 599                            | 96.8        | 3.5                     | 0.0               | 0.0         |
| Costa Rica *                       | 2002-2014       | 10,442             | 0.0              | 26.0        | 0.1        | 7,720             | 2.1        | 1.2        | 7,466                          | 93.9        | 8.4                     | 0.0               | 0.0         |
| Cuba *                             | 2000-2012       | 17,925             | 0.0              | 0.0         | 0.0        | 17,921            | 6.4        | 2.1        | 16,396                         | 98.8        | 0.6                     | 0.0               | 0.2         |
| Ecuadorian registries              | 2000-2013       | 12,294             | 9.8              | 43.5        | 0.0        | 5,740             | 3.7        | 1.3        | 5,453                          | 97.2        | 3.6                     | 0.3               | 2.5         |
| Cuenca                             | 2000-2012       | 910                | 60.8             | 14.7        | 0.0        | 223               | 2.2        | 0.9        | 216                            | 95.8        | 4.6                     | 0.0               | 29.6        |
| Guayaquil                          | 2005-2013       | 3,292              | 0.2              | 38.2        | 0.1        | 2,027             | 1.2        | 3.5        | 1,932                          | 97.3        | 4.0                     | 0.0               | 0.0         |
| Loja                               | 2000-2013       | 707                | 0.0              | 49.4        | 0.3        | 356               | 2.0        | 0.0        | 349                            | 96.0        | 4.9                     | 4.0               | 0.0         |
| Manabí                             | 2000-2013       | 3,347              | 8.5              | 54.0        | 0.0        | 1,258             | 9.8        | 0.0        | 1,135                          | 94.7        | 5.6                     | 0.0               | 0.7         |
| Quito                              | 2000-2013       | 4,038              | 8.9              | 44.6        | 0.0        | 1,876             | 2.9        | 0.0        | 1,821                          | 99.1        | 1.4                     | 0.0               | 3.5         |
| Guadeloupe *                       | 2008-2013       | 1,040              | 0.0              | 84.3        | 0.0        | 163               | 0.0        | 1.8        | 160                            | 100.0       | 1.3                     | 0.0               | 56.3        |
| Martinique *                       | 2000-2012       | 414                | 0.0              | 0.0         | 0.0        | 414               | 0.0        | 3.6        | 399                            | 99.2        | 1.0                     | 8.8               | 0.0         |
| Mexico (Childhood) †               | -               | -                  | -                | -           | -          | -                 | -          | -          | -                              | -           | -                       | -                 | -           |
| Peru (Lima)                        | 2010-2012       | 3,156              | 0.1              | 0.0         | 0.0        | 3,152             | 7.5        | 0.0        | 2,917                          | 96.2        | 1.3                     | 0.0               | 3.6         |
| Puerto Rico *                      | 2000-2011       | 2,576              | 2.4              | 0.0         | 0.2        | 2,508             | 1.2        | 0.8        | 2,458                          | 99.6        | 2.2                     | 0.0               | 0.0         |
| Uruguay *                          | 2008-2012       | 4,885              | 0.0              | 66.8        | 0.0        | 1,620             | 2.5        | 0.0        | 1,580                          | 97.2        | 3.0                     | 0.0               | 0.0         |
| <b>AMERICA (North)</b>             |                 | <b>187,037</b>     | <b>0.6</b>       | <b>10.4</b> | <b>0.2</b> | <b>166,039</b>    | <b>0.9</b> | <b>0.6</b> | <b>163,517</b>                 | <b>99.1</b> | <b>1.6</b>              | <b>2.3</b>        | <b>0.0</b>  |
| Canadian registries                | 2000-2014       | 35,687             | 0.1              | 54.4        | 0.1        | 16,208            | 0.4        | 0.6        | 16,054                         | 98.4        | 1.9                     | 0.0               | 0.0         |
| Alberta                            | 2000-2014       | 2,344              | 0.1              | 0.0         | 0.1        | 2,339             | 0.1        | 0.4        | 2,327                          | 99.4        | 1.0                     | 0.0               | 0.0         |
| British Columbia                   | 2000-2014       | 17,772             | 0.1              | 85.8        | 0.1        | 2,487             | 0.5        | 0.7        | 2,457                          | 99.6        | 0.5                     | 0.0               | 0.0         |
| Manitoba                           | 2000-2014       | 771                | 0.0              | 0.0         | 0.8        | 765               | 0.4        | 0.9        | 755                            | 99.1        | 1.5                     | 0.0               | 0.0         |
| New Brunswick                      | 2000-2014       | 478                | 0.0              | 0.0         | 0.2        | 477               | 0.0        | 0.4        | 475                            | 99.2        | 0.0                     | 0.0               | 0.0         |
| Newfoundland & Labrador            | 2000-2014       | 3,784              | 0.0              | 88.4        | 0.1        | 437               | 0.0        | 0.0        | 437                            | 100.0       | 0.5                     | 0.0               | 0.0         |
| Nova Scotia                        | 2000-2014       | 740                | 0.3              | 0.0         | 0.3        | 736               | 0.0        | 0.7        | 731                            | 99.5        | 0.7                     | 0.0               | 0.0         |
| Ontario                            | 2000-2014       | 8,223              | 0.0              | 0.0         | 0.0        | 8,223             | 0.5        | 0.6        | 8,133                          | 97.4        | 3.1                     | 0.0               | 0.0         |
| Prince Edward Island               | 2000-2014       | 928                | 0.0              | 89.2        | 0.0        | 100               | 0.0        | 0.0        | 100                            | 100.0       | 0.0                     | 0.0               | 0.0         |
| Saskatchewan                       | 2000-2014       | 647                | 0.0              | 0.0         | 0.5        | 644               | 0.5        | 0.3        | 639                            | 99.4        | 0.6                     | 0.0               | 0.0         |
| US registries                      | 2000-2014       | 151,350            | 0.8              | 0.0         | 0.2        | 149,831           | 0.9        | 0.7        | 147,463                        | 99.2        | 1.5                     | 2.5               | 0.0         |
| Alabama                            | 2000-2014       | 3,299              | 0.4              | 0.0         | 0.1        | 3,284             | 1.0        | 0.5        | 3,236                          | 97.8        | 2.5                     | 0.0               | 0.0         |
| Alaska                             | 2000-2013       | 337                | 4.5              | 0.0         | 0.3        | 321               | 0.3        | 1.2        | 316                            | 99.1        | 1.6                     | 0.0               | 0.0         |
| Arkansas                           | 2000-2011       | 1,724              | 0.1              | 0.0         | 0.0        | 1,723             | 0.4        | 0.9        | 1,701                          | 99.9        | 0.4                     | 0.0               | 0.0         |
| California                         | 2000-2011       | 18,038             | 1.6              | 0.0         | 0.3        | 17,695            | 0.4        | 0.7        | 17,497                         | 99.6        | 0.8                     | 0.0               | 0.0         |
| Greater Bay Area                   | 2000-2014       | 3,439              | 1.0              | 0.0         | 0.5        | 3,388             | 0.4        | 0.9        | 3,346                          | 99.9        | 0.6                     | 15.5              | 0.0         |
| Greater California                 | 2000-2014       | 11,681             | 1.4              | 0.0         | 0.2        | 11,495            | 0.5        | 0.7        | 11,358                         | 99.4        | 1.0                     | 13.6              | 0.0         |
| Los Angeles                        | 2000-2014       | 7,191              | 2.0              | 0.0         | 0.2        | 7,032             | 0.4        | 0.6        | 6,962                          | 99.6        | 0.8                     | 26.0              | 0.0         |
| Colorado                           | 2000-2013       | 2,228              | 0.2              | 0.0         | 0.4        | 2,214             | 2.0        | 0.4        | 2,160                          | 99.2        | 1.3                     | 0.0               | 0.0         |
| Connecticut                        | 2000-2014       | 1,898              | 0.3              | 0.0         | 0.3        | 1,887             | 0.5        | 0.8        | 1,861                          | 99.7        | 0.8                     | 12.0              | 0.0         |
| Delaware                           | 2000-2014       | 613                | 0.3              | 0.0         | 0.3        | 609               | 1.3        | 0.5        | 598                            | 99.3        | 0.8                     | 0.0               | 0.0         |
| Florida                            | 2000-2013       | 13,043             | 0.1              | 0.0         | 0.2        | 13,000            | 1.1        | 0.5        | 12,789                         | 99.6        | 2.7                     | 0.0               | 0.0         |
| Georgia                            | 2000-2014       | 5,975              | 0.0              | 0.0         | 0.2        | 5,959             | 0.9        | 0.6        | 5,872                          | 99.4        | 1.5                     | 0.0               | 0.0         |
| Atlanta                            | 2000-2014       | 1,833              | 0.1              | 0.0         | 0.2        | 1,828             | 0.8        | 0.7        | 1,800                          | 99.6        | 1.1                     | 0.0               | 0.0         |
| Hawaii                             | 2000-2014       | 790                | 0.1              | 0.0         | 0.3        | 787               | 0.4        | 0.3        | 782                            | 100.0       | 0.3                     | 8.7               | 0.0         |
| Idaho                              | 2000-2014       | 687                | 0.0              | 0.0         | 0.1        | 686               | 1.6        | 0.6        | 671                            | 99.9        | 0.3                     | 0.0               | 0.0         |
| Indiana                            | 2000-2014       | 3,959              | 0.3              | 0.0         | 0.1        | 3,945             | 1.1        | 0.5        | 3,882                          | 99.7        | 0.6                     | 0.0               | 0.0         |
| Iowa                               | 2000-2014       | 1,638              | 0.4              | 0.0         | 0.4        | 1,624             | 0.6        | 0.8        | 1,601                          | 99.6        | 0.7                     | 4.6               | 0.0         |
| Kentucky                           | 2000-2014       | 3,133              | 0.0              | 0.0         | 0.2        | 3,127             | 0.7        | 0.6        | 3,086                          | 99.3        | 1.1                     | 4.7               | 0.0         |
| Louisiana                          | 2000-2014       | 3,269              | 0.3              | 0.0         | 0.1        | 3,255             | 0.7        | 0.4        | 3,220                          | 99.7        | 0.6                     | 7.4               | 0.2         |
| Maine                              | 2000-2013       | 705                | 0.1              | 0.0         | 0.3        | 702               | 1.0        | 0.6        | 691                            | 99.6        | 0.7                     | 0.0               | 0.0         |
| Massachusetts                      | 2000-2009       | 2,186              | 0.0              | 0.0         | 0.5        | 2,174             | 0.4        | 1.2        | 2,138                          | 99.2        | 1.1                     | 0.0               | 0.0         |
| Michigan                           | 2000-2013       | 5,418              | 0.5              | 0.0         | 0.2        | 5,380             | 0.5        | 0.8        | 5,306                          | 98.5        | 2.1                     | 0.0               | 0.0         |

Web-table 2.10: Data quality indicators, women diagnosed during 2000-2014, by continent, country and registry: CERVIX

|                     | Calendar period | Patients submitted | Ineligible (%) ¶ |             |            | Excluded (%) ¶¶   |            |            | Patients included | Data quality indicators (%) †† |                         |                   |            |
|---------------------|-----------------|--------------------|------------------|-------------|------------|-------------------|------------|------------|-------------------|--------------------------------|-------------------------|-------------------|------------|
|                     |                 |                    | Incomplete dates | In situ     | Other      | Eligible patients | DCO        | Other      |                   | MV                             | Non-specific morphology | Lost to follow-up | Censored   |
| Detroit             | 2000-2014       | 2,551              | 0.9              | 0.0         | 0.2        | 2,523             | 0.9        | 0.8        | 2,480             | 99.6                           | 0.8                     | 7.1               | 0.0        |
| Minnesota           | 2000-2013       | 2,292              | 0.0              | 0.0         | 0.2        | 2,287             | 1.6        | 0.8        | 2,233             | 100.0                          | 0.1                     | 0.0               | 0.0        |
| Mississippi         | 2002-2014       | 1,930              | 0.4              | 0.0         | 0.2        | 1,920             | 2.0        | 0.6        | 1,870             | 99.4                           | 1.0                     | 0.0               | 0.0        |
| Missouri            | -               | -                  | -                | -           | -          | -                 | -          | -          | -                 | -                              | -                       | -                 | -          |
| Montana             | 2000-2014       | 510                | 2.0              | 0.0         | 0.2        | 499               | 1.8        | 1.0        | 485               | 99.6                           | 0.6                     | 0.0               | 0.0        |
| Nebraska            | 2000-2014       | 995                | 0.3              | 0.0         | 0.5        | 987               | 1.0        | 0.8        | 969               | 99.5                           | 0.6                     | 0.0               | 0.0        |
| New Hampshire       | 2000-2014       | 634                | 0.3              | 0.0         | 0.6        | 628               | 0.5        | 1.6        | 615               | 99.8                           | 0.3                     | 0.0               | 0.0        |
| New Jersey          | 2000-2014       | 6,316              | 1.3              | 0.0         | 0.3        | 6,220             | 0.7        | 0.6        | 6,136             | 99.5                           | 1.3                     | 43.3              | 0.0        |
| New Mexico          | 2000-2014       | 1,196              | 0.0              | 0.0         | 0.7        | 1,188             | 1.0        | 0.3        | 1,172             | 99.0                           | 2.0                     | 12.5              | 0.5        |
| New York            | 2000-2014       | 13,481             | 2.4              | 0.0         | 0.4        | 13,111            | 0.5        | 0.7        | 12,961            | 99.5                           | 0.9                     | 0.0               | 0.0        |
| New York City       | 2000-2014       | 6,835              | 2.7              | 0.0         | 0.3        | 6,633             | 0.4        | 0.6        | 6,568             | 99.7                           | 0.8                     | 0.0               | 0.0        |
| North Carolina      | 2000-2014       | 5,487              | 0.0              | 0.0         | 0.2        | 5,476             | 1.2        | 0.6        | 5,377             | 99.3                           | 1.0                     | 0.0               | 0.0        |
| Ohio                | 2000-2014       | 7,219              | 0.1              | 0.0         | 0.2        | 7,197             | 1.9        | 0.5        | 7,030             | 99.4                           | 1.1                     | 0.0               | 0.0        |
| Oklahoma            | 2000-2010       | 1,976              | 0.4              | 0.0         | 0.0        | 1,969             | 1.6        | 0.6        | 1,926             | 98.4                           | 2.6                     | 0.0               | 0.0        |
| Oregon              | 2000-2013       | 1,852              | 0.2              | 0.0         | 0.3        | 1,844             | 0.9        | 0.4        | 1,819             | 98.7                           | 1.8                     | 0.0               | 0.0        |
| Pennsylvania        | 2000-2014       | 8,103              | 0.9              | 0.0         | 0.3        | 8,000             | 0.9        | 0.7        | 7,878             | 99.6                           | 0.8                     | 0.0               | 0.0        |
| Rhode Island        | 2000-2014       | 627                | 0.3              | 0.0         | 0.0        | 625               | 0.2        | 0.8        | 619               | 99.0                           | 1.5                     | 0.0               | 0.0        |
| South Carolina      | 2000-2014       | 2,969              | 0.0              | 0.0         | 0.2        | 2,962             | 1.4        | 0.5        | 2,906             | 98.6                           | 2.1                     | 0.0               | 0.0        |
| Tennessee           | 2000-2011       | 3,313              | 0.3              | 0.0         | 0.0        | 3,302             | 0.7        | 0.8        | 3,255             | 99.7                           | 0.6                     | 0.0               | 0.1        |
| Texas               | 2000-2013       | 15,890             | 0.9              | 0.0         | 0.1        | 15,719            | 1.3        | 0.8        | 15,396            | 97.6                           | 4.2                     | 0.0               | 0.0        |
| Utah                | 2000-2014       | 921                | 0.1              | 0.0         | 0.5        | 915               | 0.1        | 0.4        | 910               | 99.5                           | 0.5                     | 15.8              | 0.0        |
| Vermont             | 2000-2013       | 284                | 0.4              | 0.0         | 0.7        | 281               | 2.1        | 1.1        | 272               | 99.6                           | 0.4                     | 0.0               | 0.0        |
| Washington          | 2000-2008       | 2,011              | 2.2              | 0.0         | 0.3        | 1,960             | 0.5        | 0.8        | 1,936             | 99.7                           | 0.9                     | 0.0               | 0.0        |
| Seattle             | 2000-2014       | 2,425              | 1.4              | 0.0         | 0.3        | 2,383             | 0.3        | 0.5        | 2,365             | 99.8                           | 0.5                     | 5.3               | 0.0        |
| West Virginia       | 2000-2014       | 1,500              | 0.5              | 0.0         | 0.0        | 1,493             | 0.8        | 0.5        | 1,474             | 99.3                           | 1.6                     | 0.0               | 0.0        |
| Wisconsin           | 2000-2013       | 2,602              | 0.7              | 0.0         | 0.3        | 2,575             | 1.4        | 0.8        | 2,518             | 99.6                           | 1.0                     | 0.0               | 0.0        |
| Wyoming             | 2000-2013       | 302                | 0.3              | 0.0         | 0.0        | 301               | 0.0        | 0.7        | 299               | 99.7                           | 0.3                     | 0.0               | 0.0        |
| <b>ASIA</b>         |                 | <b>267,663</b>     | <b>0.8</b>       | <b>37.4</b> | <b>0.0</b> | <b>165,287</b>    | <b>1.1</b> | <b>1.1</b> | <b>161,620</b>    | <b>96.1</b>                    | <b>5.5</b>              | <b>0.8</b>        | <b>1.3</b> |
| Chinese registries  | 2003-2013       | 13,721             | 0.7              | 3.0         | 0.0        | 13,206            | 0.5        | 0.1        | 13,131            | 89.8                           | 20.7                    | 5.8               | 0.2        |
| Beijing             | 2003-2013       | 3,194              | 0.1              | 0.0         | 0.0        | 3,192             | 0.3        | 0.1        | 3,181             | 89.5                           | 10.7                    | 14.1              | 0.4        |
| Changle             | 2003-2013       | 407                | 7.1              | 3.4         | 0.0        | 364               | 0.3        | 1.9        | 356               | 90.7                           | 14.9                    | 5.6               | 0.0        |
| Cixian              | 2003-2013       | 288                | 0.0              | 0.3         | 0.0        | 287               | 0.7        | 0.0        | 285               | 91.6                           | 8.4                     | 0.0               | 0.0        |
| Dafeng              | 2003-2013       | 795                | 0.0              | 0.0         | 0.1        | 794               | 0.1        | 0.0        | 793               | 92.8                           | 21.4                    | 0.0               | 0.0        |
| Dalian              | 2003-2013       | 1,985              | 0.0              | 0.0         | 0.1        | 1,984             | 1.2        | 0.0        | 1,960             | 97.3                           | 5.1                     | 0.0               | 0.4        |
| Donghai             | 2003-2013       | 405                | 0.0              | 0.0         | 0.0        | 405               | 3.0        | 0.0        | 393               | 64.6                           | 35.4                    | 10.2              | 0.0        |
| Feicheng            | 2003-2013       | 170                | 0.0              | 1.8         | 0.0        | 167               | 0.6        | 0.0        | 166               | 77.7                           | 25.9                    | 6.6               | 0.0        |
| Ganyu               | 2003-2013       | 265                | 0.0              | 0.0         | 0.0        | 265               | 0.0        | 0.0        | 265               | 54.3                           | 47.5                    | 3.0               | 0.0        |
| Guanyun             | 2004-2013       | 337                | 0.0              | 0.0         | 0.0        | 337               | 0.0        | 0.0        | 337               | 96.7                           | 47.8                    | 2.1               | 0.0        |
| Haimen              | 2003-2013       | 813                | 0.0              | 0.0         | 0.2        | 811               | 0.0        | 0.0        | 811               | 96.3                           | 3.7                     | 2.1               | 0.0        |
| Haining             | 2003-2013       | 375                | 0.0              | 3.2         | 0.0        | 363               | 0.0        | 0.0        | 363               | 96.4                           | 16.0                    | 0.0               | 0.0        |
| Jianhu              | 2003-2013       | 690                | 0.0              | 0.0         | 0.0        | 690               | 0.0        | 0.0        | 690               | 96.2                           | 63.2                    | 10.9              | 0.0        |
| Jiashan             | 2003-2013       | 176                | 0.0              | 1.1         | 0.0        | 174               | 0.0        | 0.0        | 174               | 96.0                           | 4.6                     | 0.0               | 0.0        |
| Jintan              | 2003-2013       | 300                | 0.0              | 0.0         | 0.0        | 300               | 0.7        | 0.0        | 298               | 43.3                           | 56.7                    | 1.3               | 0.0        |
| Lianyungang         | 2008-2013       | 377                | 0.0              | 0.0         | 0.0        | 377               | 1.1        | 0.0        | 373               | 90.6                           | 26.8                    | 25.5              | 0.0        |
| Linzhou             | 2003-2013       | 577                | 0.0              | 0.2         | 0.0        | 576               | 0.3        | 0.0        | 574               | 81.4                           | 18.6                    | 0.0               | 0.0        |
| Qidong              | 2003-2013       | 589                | 0.0              | 0.0         | 0.0        | 589               | 0.0        | 0.0        | 589               | 93.9                           | 6.1                     | 2.2               | 0.0        |
| Sihui               | 2003-2013       | 162                | 5.6              | 0.0         | 0.0        | 153               | 3.3        | 0.0        | 148               | 95.3                           | 31.1                    | 6.1               | 1.4        |
| Taixing             | 2003-2013       | 316                | 16.5             | 0.0         | 0.0        | 264               | 1.1        | 0.0        | 261               | 72.4                           | 97.7                    | 4.6               | 0.0        |
| Yangzhong           | 2003-2013       | 312                | 0.0              | 0.0         | 0.0        | 312               | 0.0        | 0.0        | 312               | 95.5                           | 94.9                    | 0.0               | 0.0        |
| Zhongshan           | 2003-2013       | 1,188              | 0.0              | 32.4        | 0.1        | 802               | 0.0        | 0.0        | 802               | 98.4                           | 2.7                     | 0.1               | 0.0        |
| Cyprus *            | 2004-2014       | 418                | 2.4              | 18.4        | 0.5        | 329               | 2.1        | 0.3        | 321               | 99.7                           | 0.9                     | 0.0               | 53.0       |
| Hong Kong *         | 2005-2014       | 4,282              | 3.5              | 0.0         | 0.1        | 4,127             | 0.1        | 0.3        | 4,112             | 99.4                           | 0.1                     | 11.3              | 0.0        |
| Indian registries   | 2000-2014       | 943                | 16.6             | 0.0         | 0.0        | 786               | 3.2        | 1.0        | 753               | 93.8                           | 6.6                     | 5.8               | 0.7        |
| Guwahati            | 2004-2014       | 657                | 23.7             | 0.0         | 0.0        | 501               | 4.6        | 1.4        | 471               | 96.2                           | 3.8                     | 8.9               | 1.1        |
| Karunagappally      | 2000-2014       | 286                | 0.3              | 0.0         | 0.0        | 285               | 0.7        | 0.4        | 282               | 89.7                           | 11.3                    | 0.7               | 0.0        |
| Iran (Golestan)     | -               | -                  | -                | -           | -          | -                 | -          | -          | -                 | -                              | -                       | -                 | -          |
| Israel *            | 2000-2013       | 11,440             | 0.0              | 73.6        | 0.1        | 3,010             | 1.7        | 0.6        | 2,942             | 98.5                           | 1.9                     | 0.0               | 0.0        |
| Japanese registries | 2000-2014       | 65,567             | 1.7              | 49.4        | 0.1        | 32,032            | 4.4        | 0.1        | 30,606            | 97.4                           | 5.6                     | 0.0               | 2.9        |
| Aichi               | 2003-2013       | 10,357             | 0.2              | 47.5        | 0.1        | 5,416             | 2.9        | 0.0        | 5,261             | 98.9                           | 2.0                     | 0.0               | 5.2        |
| Akita               | 2010-2014       | 1,147              | 0.3              | 69.0        | 0.3        | 349               | 0.0        | 2.9        | 339               | 96.8                           | 5.9                     | 0.0               | 49.6       |
| Ehime               | 2007-2013       | 2,987              | 0.0              | 70.4        | 0.1        | 882               | 4.3        | 0.0        | 844               | 98.9                           | 2.1                     | 0.0               | 0.0        |
| Fukui               | 2003-2009       | 689                | 0.1              | 47.3        | 0.1        | 361               | 1.4        | 0.0        | 356               | 98.0                           | 3.1                     | 0.0               | 3.1        |
| Gunma               | 2003-2012       | 3,163              | 31.9             | 32.9        | 0.0        | 1,114             | 8.3        | 0.0        | 1,021             | 98.8                           | 1.7                     | 0.0               | 3.9        |
| Hiroshima           | 2004-2008       | 2,552              | 0.2              | 57.7        | 0.2        | 1,071             | 2.5        | 0.0        | 1,044             | 99.6                           | 0.6                     | 0.0               | 0.8        |
| Hyogo               | 2007-2012       | 5,576              | 0.3              | 55.5        | 0.2        | 2,460             | 9.3        | 0.0        | 2,231             | 98.7                           | 2.6                     | 0.0               | 2.2        |
| Ibaraki             | 2006-2012       | 3,097              | 0.2              | 47.0        | 0.2        | 1,628             | 5.5        | 0.0        | 1,538             | 96.9                           | 7.5                     | 0.0               | 2.2        |
| Kanagawa            | 2000-2013       | 12,387             | 0.0              | 39.2        | 0.0        | 7,520             | 5.6        | 0.2        | 7,089             | 95.1                           | 13.1                    | 0.0               | 0.0        |
| Miyagi              | 2000-2010       | 3,125              | 1.2              | 54.4        | 0.0        | 1,386             | 2.7        | 0.1        | 1,348             | 95.2                           | 5.0                     | 0.0               | 1.5        |
| Niigata             | 2000-2013       | 5,598              | 0.1              | 64.4        | 0.1        | 1,984             | 3.5        | 0.4        | 1,907             | 98.3                           | 0.3                     | 0.0               | 0.0        |
| Osaka               | 2000-2008       | 7,753              | 0.0              | 37.7        | 0.1        | 4,823             | 3.6        | 0.0        | 4,647             | 97.3                           | 6.3                     | 0.0               | 5.4        |
| Saga                | 2006-2013       | 1,280              | 0.3              | 57.0        | 0.2        | 544               | 1.7        | 0.0        | 535               | 98.3                           | 2.8                     | 0.0               | 0.0        |
| Tochigi             | 2006-2013       | 2,918              | 0.2              | 52.9        | 0.0        | 1,369             | 1.6        | 0.0        | 1,347             | 98.9                           | 1.8                     | 0.0               | 1.9        |
| Yamagata            | 2003-2013       | 2,229              | 0.2              | 62.9        | 0.1        | 821               | 1.9        | 0.0        | 805               | 98.6                           | 2.2                     | 0.0               | 0.5        |
| Yamanashi           | 2008-2012       | 709                | 0.0              | 57.1        | 0.0        | 304               | 3.3        | 0.0        | 294               | 98.3                           | 2.7                     | 0.0               | 0.3        |
| Jordan *            | 2000-2014       | 645                | 0.3              | 8.4         | 0.3        | 587               | 0.0        | 1.4        | 579               | 99.8                           | 2.1                     | 4.1               | 0.0        |
| Korea * ‡           | 2000-2014       | 59,129             | 0.8              | 0.0         | 0.0        | 58,675            | 0.0        | 0.0        | 58,663            | 97.0                           | 3.8                     | 0.0               | 0.0        |
| Kuwait *            | 2000-2013       | 183                | 0.0              | 9.8         | 0.0        | 165               | 1.2        | 0.0        | 163               | 100.0                          | 0.0                     | 0.6               | 0.0        |
| Malaysia (Penang)   | 2000-2013       | 1,072              | 0.7              | 0.0         | 0.0        | 1,065             | 0.1        | 1.7        | 1,046             | 97.4                           | 6.5                     | 0.0               | 23.7       |
| Mongolia *          | -               | -                  | -                | -           | -          | -                 | -          | -          | -                 | -                              | -                       | -                 | -          |
| Qatar *             | 2000-2014       | 232                | 0.0              | 14.2        | 0.0        | 199               | 1.5        | 0.0        | 196               | 98.5                           | 2.0                     | 0.0               | 60.7       |
| Singapore *         | 2000-2014       | 7,551              | 0.0              | 60.7        | 0.1        | 2,961             | 0.2        | 0.4        | 2,943             | 99.3                           | 0.4                     | 0.0               | 0.0        |
| Taiwan *            | 2000-2014       | 81,469             | 0.1              | 64.1        | 0.0        | 29,216            | 0.0        | 0.0        | 29,214            | 98.0                           | 0.4                     | 0.0               | 0.0        |

Web-table 2.10: Data quality indicators, women diagnosed during 2000-2014, by continent, country and registry: CERVIX

|                                | Calendar period | Patients submitted | Ineligible (%) ¶ |             |            | Eligible patients | Excluded (%) ¶¶ |            | Patients included | Data quality indicators (%) †† |                         |                   |            |
|--------------------------------|-----------------|--------------------|------------------|-------------|------------|-------------------|-----------------|------------|-------------------|--------------------------------|-------------------------|-------------------|------------|
|                                |                 |                    | Incomplete dates | In situ     | Other      |                   | DCO             | Other      |                   | MV                             | Non-specific morphology | Lost to follow-up | Censored   |
| Thai registries                | 2000-2014       | 14,870             | 0.0              | 1.1         | 0.2        | 14,670            | 1.9             | 11.2       | 12,737            | 87.7                           | 12.9                    | 0.1               | 4.1        |
| Bangkok                        | 2000-2012       | 7,036              | 0.0              | 2.3         | 0.5        | 6,839             | 3.3             | 24.1       | 4,965             | 85.5                           | 15.0                    | 0.0               | 0.0        |
| Khon Kaen                      | 2000-2014       | 1,993              | 0.0              | 0.0         | 0.0        | 1,993             | 0.5             | 0.1        | 1,982             | 89.9                           | 10.7                    | 0.0               | 5.2        |
| Lampang                        | 2000-2014       | 1,427              | 0.0              | 0.0         | 0.1        | 1,426             | 0.9             | 0.0        | 1,413             | 90.7                           | 9.3                     | 0.0               | 0.0        |
| Lamphun                        | 2000-2014       | 1,164              | 0.0              | 0.0         | 0.0        | 1,164             | 0.6             | 0.0        | 1,157             | 78.1                           | 21.9                    | 0.0               | 0.0        |
| Lopburi                        | 2000-2014       | 1,616              | 0.0              | 0.0         | 0.0        | 1,616             | 1.3             | 0.0        | 1,595             | 85.1                           | 14.9                    | 0.0               | 25.1       |
| Songkhla                       | 2000-2014       | 1,634              | 0.0              | 0.0         | 0.1        | 1,632             | 0.4             | 0.0        | 1,625             | 98.2                           | 3.7                     | 0.5               | 1.4        |
| Turkish registries             | 2000-2013       | 6,141              | 1.2              | 29.3        | 0.1        | 4,259             | 0.8             | 0.3        | 4,214             | 97.9                           | 4.6                     | 0.2               | 4.2        |
| Ankara                         | 2008-2012       | 1,618              | 0.0              | 19.8        | 0.1        | 1,295             | 0.0             | 0.0        | 1,295             | 99.6                           | 3.2                     | 0.0               | 1.8        |
| Antalya                        | 2006-2012       | 865                | 0.1              | 57.2        | 0.0        | 369               | 0.0             | 0.0        | 369               | 98.9                           | 2.4                     | 0.0               | 2.2        |
| Bursa                          | 2006-2012       | 462                | 5.0              | 0.0         | 0.0        | 439               | 3.4             | 0.7        | 421               | 95.2                           | 7.8                     | 0.0               | 0.0        |
| Edirne                         | 2006-2012       | 60                 | 5.0              | 0.0         | 0.0        | 57                | 0.0             | 0.0        | 57                | 96.5                           | 5.3                     | 0.0               | 0.0        |
| Erzurum                        | 2006-2012       | 99                 | 0.0              | 16.2        | 0.0        | 83                | 0.0             | 0.0        | 83                | 90.4                           | 10.8                    | 0.0               | 6.0        |
| Eskisehir                      | 2006-2012       | 109                | 0.0              | 0.0         | 0.0        | 109               | 0.0             | 0.0        | 109               | 96.3                           | 0.0                     | 0.0               | 0.9        |
| Izmir                          | 2000-2013       | 2,525              | 1.9              | 33.3        | 0.1        | 1,635             | 1.0             | 0.6        | 1,610             | 97.5                           | 5.2                     | 0.0               | 8.3        |
| Samsun                         | 2006-2012       | 228                | 0.0              | 31.6        | 0.0        | 156               | 1.3             | 0.0        | 154               | 96.8                           | 5.2                     | 6.5               | 0.0        |
| Trabzon                        | 2006-2012       | 175                | 0.6              | 32.6        | 0.6        | 116               | 0.0             | 0.0        | 116               | 98.3                           | 6.9                     | 0.0               | 4.3        |
| <b>EUROPE</b>                  |                 | <b>1,099,729</b>   | <b>0.0</b>       | <b>66.7</b> | <b>8.6</b> | <b>271,992</b>    | <b>1.2</b>      | <b>0.3</b> | <b>267,986</b>    | <b>98.2</b>                    | <b>0.8</b>              | <b>1.2</b>        | <b>1.9</b> |
| Austria *                      | 2000-2014       | 25,379             | 0.0              | 73.7        | 0.0        | 6,671             | 2.8             | 0.4        | 6,455             | 99.1                           | 2.9                     | 0.0               | 0.0        |
| Belarus (Childhood) †          | -               | -                  | -                | -           | -          | -                 | -               | -          | -                 | -                              | -                       | -                 | -          |
| Belgium *                      | 2004-2014       | 36,594             | 0.0              | 81.0        | 0.0        | 6,944             | 0.0             | 0.2        | 6,929             | 99.6                           | 0.6                     | 2.2               | 0.0        |
| Bulgaria *                     | 2000-2014       | 16,549             | 0.0              | 0.0         | 0.0        | 16,549            | 1.3             | 0.0        | 16,329            | 98.7                           | 0.1                     | 0.1               | 0.0        |
| Croatia *                      | 2000-2014       | 12,744             | 0.0              | 58.0        | 0.0        | 5,354             | 1.3             | 0.1        | 5,279             | 88.3                           | 0.0                     | 0.0               | 0.0        |
| Czech Republic *               | 2000-2014       | 46,617             | 0.0              | 67.5        | 0.2        | 15,045            | 0.4             | 0.2        | 14,950            | 98.4                           | 0.6                     | 0.0               | 0.0        |
| Denmark *                      | 2000-2014       | 5,761              | 0.0              | 0.0         | 0.1        | 5,755             | 0.0             | 0.0        | 5,755             | 99.7                           | 0.8                     | 0.6               | 0.0        |
| Estonia *                      | 2000-2012       | 2,879              | 0.0              | 21.6        | 0.0        | 2,257             | 1.0             | 0.1        | 2,232             | 98.1                           | 1.0                     | 1.6               | 0.0        |
| Finland *                      | 2000-2014       | 15,525             | 0.1              | 84.7        | 0.1        | 2,344             | 1.0             | 0.1        | 2,318             | 99.2                           | 1.6                     | 0.3               | 0.0        |
| French registries              | 2000-2010       | 5,199              | 0.4              | 0.0         | 0.0        | 5,176             | 0.0             | 1.0        | 5,125             | 99.5                           | 0.3                     | 3.5               | 0.0        |
| Bas-Rhin                       | 2000-2010       | 533                | 0.0              | 0.0         | 0.0        | 533               | 0.0             | 0.2        | 532               | 99.2                           | 0.0                     | 2.3               | 0.0        |
| Basse Normandie                | -               | -                  | -                | -           | -          | -                 | -               | -          | -                 | -                              | -                       | -                 | -          |
| Burgundy Digestive             | -               | -                  | -                | -           | -          | -                 | -               | -          | -                 | -                              | -                       | -                 | -          |
| Calvados                       | 2000-2010       | 342                | 0.0              | 0.0         | 0.0        | 342               | 0.0             | 0.0        | 342               | 99.7                           | 0.3                     | 0.6               | 0.0        |
| Calvados Digestive             | -               | -                  | -                | -           | -          | -                 | -               | -          | -                 | -                              | -                       | -                 | -          |
| Côte-d'Or Gynaecologic         | 2000-2010       | 286                | 1.4              | 0.0         | 0.0        | 282               | 0.0             | 6.0        | 265               | 99.6                           | 0.0                     | 12.8              | 0.0        |
| Côte-d'Or Haematopoietic       | -               | -                  | -                | -           | -          | -                 | -               | -          | -                 | -                              | -                       | -                 | -          |
| Doubs                          | 2000-2010       | 302                | 0.0              | 0.0         | 0.0        | 302               | 0.0             | 0.0        | 302               | 100.0                          | 0.0                     | 2.0               | 0.0        |
| Finistère                      | -               | -                  | -                | -           | -          | -                 | -               | -          | -                 | -                              | -                       | -                 | -          |
| Gironde CNS                    | -               | -                  | -                | -           | -          | -                 | -               | -          | -                 | -                              | -                       | -                 | -          |
| Gironde General                | 2005-2010       | 284                | 5.6              | 0.0         | 0.0        | 268               | 0.0             | 0.4        | 267               | 98.1                           | 0.4                     | 7.9               | 0.0        |
| Gironde Haematopoietic         | -               | -                  | -                | -           | -          | -                 | -               | -          | -                 | -                              | -                       | -                 | -          |
| Haut-Rhin                      | 2000-2010       | 388                | 0.0              | 0.0         | 0.0        | 388               | 0.0             | 0.3        | 387               | 100.0                          | 0.0                     | 5.4               | 0.0        |
| Haute-Vienne                   | 2009-2009       | 22                 | 0.0              | 0.0         | 0.0        | 22                | 0.0             | 0.0        | 22                | 95.5                           | 0.0                     | 0.0               | 0.0        |
| Hérault                        | 2000-2010       | 711                | 0.0              | 0.0         | 0.0        | 711               | 0.0             | 0.4        | 708               | 99.2                           | 0.0                     | 2.1               | 0.0        |
| Isère                          | 2000-2010       | 523                | 0.0              | 0.0         | 0.0        | 523               | 0.0             | 2.7        | 509               | 99.4                           | 0.4                     | 1.8               | 0.0        |
| Lille Metro                    | 2008-2010       | 142                | 0.0              | 0.0         | 0.0        | 142               | 0.0             | 0.0        | 142               | 100.0                          | 0.0                     | 2.1               | 0.0        |
| Loire-Atlantique               | 2000-2010       | 767                | 0.3              | 0.0         | 0.0        | 765               | 0.0             | 1.2        | 756               | 100.0                          | 0.8                     | 3.8               | 0.0        |
| Manche                         | 2000-2010       | 280                | 0.0              | 0.0         | 0.0        | 280               | 0.0             | 0.0        | 280               | 100.0                          | 0.4                     | 1.8               | 0.0        |
| Somme                          | 2000-2010       | 371                | 0.0              | 0.0         | 0.3        | 370               | 0.0             | 1.1        | 366               | 98.9                           | 0.5                     | 4.1               | 0.0        |
| Tarn                           | 2000-2010       | 248                | 0.0              | 0.0         | 0.0        | 248               | 0.0             | 0.4        | 247               | 99.6                           | 0.8                     | 2.8               | 0.0        |
| France Childhood Haem †        | -               | -                  | -                | -           | -          | -                 | -               | -          | -                 | -                              | -                       | -                 | -          |
| France Childhood Solid †       | -               | -                  | -                | -           | -          | -                 | -               | -          | -                 | -                              | -                       | -                 | -          |
| German registries              | 2000-2014       | 61,642             | 0.1              | 57.9        | 0.1        | 25,797            | 5.6             | 0.2        | 24,302            | 99.0                           | 0.4                     | 0.7               | 17.7       |
| Brandenburg                    | 2000-2014       | 7,054              | 0.0              | 61.1        | 0.2        | 2,736             | 3.7             | 0.2        | 2,629             | 98.3                           | 0.4                     | 0.0               | 21.8       |
| Bremen                         | 2000-2013       | 1,372              | 0.0              | 53.7        | 0.2        | 632               | 2.8             | 0.0        | 614               | 99.0                           | 0.2                     | 6.5               | 0.0        |
| Hamburg                        | 2000-2013       | 1,651              | 0.0              | 0.0         | 0.0        | 1,651             | 6.8             | 0.1        | 1,538             | 99.6                           | 0.4                     | 8.8               | 0.0        |
| Lower Saxony                   | 2003-2013       | 5,340              | 1.3              | 0.0         | 0.2        | 5,258             | 7.8             | 0.3        | 4,830             | 99.8                           | 0.3                     | 0.0               | 26.5       |
| Mecklenburg-W. Pomerania       | 2000-2014       | 6,352              | 0.0              | 73.0        | 0.0        | 1,713             | 3.2             | 0.2        | 1,655             | 99.0                           | 0.3                     | 0.0               | 19.5       |
| Rhineland Palatinate           | 2000-2013       | 10,622             | 0.0              | 70.5        | 0.0        | 3,131             | 7.4             | 0.1        | 2,896             | 97.9                           | 0.1                     | 0.0               | 28.3       |
| Saarland                       | 2000-2012       | 3,333              | 0.0              | 71.3        | 0.0        | 956               | 1.3             | 0.7        | 937               | 99.9                           | 0.3                     | 0.0               | 0.0        |
| Saxony                         | 2000-2014       | 12,839             | 0.0              | 64.3        | 0.2        | 4,562             | 3.0             | 0.2        | 4,417             | 98.7                           | 1.0                     | 0.0               | 18.1       |
| Schleswig-Holstein             | 2000-2012       | 9,143              | 0.0              | 72.0        | 0.1        | 2,555             | 10.3            | 0.3        | 2,286             | 99.3                           | 0.8                     | 0.0               | 0.0        |
| Thuringia                      | 2000-2014       | 3,936              | 0.0              | 33.8        | 0.1        | 2,603             | 3.6             | 0.3        | 2,500             | 99.3                           | 0.2                     | 0.0               | 20.0       |
| Gibraltar *                    | 2001-2007       | 87                 | 9.2              | 79.3        | 0.0        | 10                | 0.0             | 0.0        | 10                | 100.0                          | 0.0                     | 0.0               | 30.0       |
| Greece (National Paediatric) † | -               | -                  | -                | -           | -          | -                 | -               | -          | -                 | -                              | -                       | -                 | -          |
| Iceland *                      | 2000-2014       | 225                | 0.0              | 0.0         | 0.0        | 225               | 0.0             | 0.0        | 225               | 99.6                           | 0.4                     | 0.0               | 0.0        |
| Ireland *                      | 2000-2013       | 33,119             | 0.0              | 89.1        | 0.0        | 3,597             | 0.3             | 0.4        | 3,573             | 99.2                           | 0.7                     | 0.0               | 0.0        |
| Italian registries             | 2000-2014       | 23,505             | 0.0              | 39.9        | 2.9        | 13,442            | 0.1             | 0.2        | 13,394            | 96.7                           | 4.0                     | 1.8               | 1.4        |
| Alto Adige                     | 2000-2010       | 231                | 0.0              | 0.0         | 0.0        | 231               | 0.9             | 0.0        | 229               | 100.0                          | 0.0                     | 0.0               | 0.0        |
| Barletta-Andria-Trani          | 2006-2012       | 106                | 0.0              | 0.0         | 0.0        | 106               | 0.0             | 0.0        | 106               | 96.2                           | 3.8                     | 0.9               | 0.9        |
| Basilicata                     | 2006-2010       | 120                | 0.0              | 0.0         | 0.0        | 120               | 0.0             | 0.0        | 120               | 92.5                           | 8.3                     | 1.7               | 0.8        |
| Bergamo                        | 2007-2012       | 293                | 0.0              | 0.0         | 0.0        | 293               | 0.0             | 0.0        | 293               | 96.9                           | 3.1                     | 2.4               | 0.0        |
| Biella-Vercelli                | 2000-2010       | 463                | 0.0              | 60.3        | 0.2        | 183               | 0.5             | 1.1        | 180               | 99.4                           | 1.1                     | 0.0               | 1.7        |
| Brescia                        | 2000-2008       | 490                | 0.0              | 0.0         | 0.0        | 490               | 0.0             | 0.0        | 490               | 90.0                           | 10.8                    | 0.8               | 0.0        |
| Brindisi                       | 2006-2008       | 42                 | 0.0              | 0.0         | 0.0        | 42                | 0.0             | 2.4        | 41                | 100.0                          | 0.0                     | 0.0               | 4.9        |
| Caserta                        | 2008-2010       | 85                 | 0.0              | 0.0         | 0.0        | 85                | 0.0             | 1.2        | 84                | 98.8                           | 1.2                     | 0.0               | 10.7       |
| Catania-Messina-Enna           | 2003-2012       | 735                | 0.0              | 0.0         | 0.0        | 735               | 0.0             | 0.4        | 732               | 97.0                           | 7.0                     | 0.0               | 3.7        |
| Catanzaro                      | 2003-2009       | 91                 | 0.0              | 0.0         | 0.0        | 91                | 0.0             | 1.1        | 90                | 100.0                          | 0.0                     | 1.1               | 0.0        |
| Como                           | 2003-2011       | 249                | 0.0              | 0.0         | 0.0        | 249               | 0.0             | 0.0        | 249               | 99.6                           | 0.8                     | 2.8               | 0.4        |
| Cremona                        | 2005-2010       | 92                 | 0.0              | 0.0         | 0.0        | 92                | 0.0             | 1.1        | 91                | 95.6                           | 4.4                     | 1.1               | 0.0        |
| Ferrara                        | 2000-2011       | 192                | 0.0              | 0.0         | 0.0        | 192               | 0.0             | 0.5        | 191               | 99.0                           | 1.0                     | 3.7               | 0.0        |
| Friuli-Venezia-Giulia          | 2000-2010       | 652                | 0.0              | 0.0         | 0.0        | 652               | 0.6             | 0.2        | 647               | 99.4                           | 0.6                     | 0.9               | 0.0        |
| Genoa                          | 2000-2009       | 2,035              | 0.0              | 40.0        | 29.8       | 616               | 0.0             | 0.0        | 616               | 96.6                           | 3.4                     | 0.2               | 0.0        |
| Latina                         | 2000-2011       | 260                | 0.0              | 0.0         | 0.0        | 260               | 0.0             | 0.8        | 258               | 89.1                           | 11.2                    | 3.9               | 3.5        |
| Lecce                          | 2003-2008       | 219                | 0.0              | 0.0         | 0.0        | 219               | 0.0             | 1.8        | 215               | 95.3                           | 6.5                     | 0.0               | 1.9        |

Web-table 2.10: Data quality indicators, women diagnosed during 2000-2014, by continent, country and registry: CERVIX

|                      | Calendar period | Patients submitted | Ineligible (%) ¶ |         |       | Excluded (%) ¶¶   |     |       | Data quality indicators (%) †† |       |                         |                   |          |
|----------------------|-----------------|--------------------|------------------|---------|-------|-------------------|-----|-------|--------------------------------|-------|-------------------------|-------------------|----------|
|                      |                 |                    | Incomplete dates | In situ | Other | Eligible patients | DCO | Other | Patients included              | MV    | Non-specific morphology | Lost to follow-up | Censored |
| Mantova              | 2000-2010       | 162                | 0.0              | 0.0     | 0.0   | 162               | 0.0 | 0.0   | 162                            | 96.9  | 4.9                     | 0.0               | 0.0      |
| Milano               | 2000-2012       | 1,058              | 0.0              | 0.0     | 0.0   | 1,058             | 0.0 | 0.0   | 1,058                          | 96.1  | 5.0                     | 6.1               | 0.9      |
| Modena               | 2000-2012       | 2,153              | 0.0              | 79.1    | 2.6   | 393               | 0.0 | 0.0   | 393                            | 100.0 | 0.0                     | 0.0               | 3.8      |
| Monza-Brianza        | 2007-2012       | 194                | 0.0              | 0.0     | 0.0   | 194               | 0.0 | 0.0   | 194                            | 95.4  | 4.6                     | 3.1               | 0.0      |
| Naples               | 2000-2012       | 323                | 0.0              | 0.0     | 0.0   | 323               | 0.0 | 0.3   | 322                            | 98.4  | 1.9                     | 4.0               | 3.1      |
| Nuoro                | 2004-2012       | 46                 | 0.0              | 0.0     | 0.0   | 46                | 4.3 | 0.0   | 44                             | 97.7  | 2.3                     | 0.0               | 0.0      |
| Palermo              | 2003-2012       | 466                | 0.0              | 0.0     | 0.0   | 466               | 0.6 | 0.0   | 463                            | 92.7  | 8.0                     | 0.9               | 0.0      |
| Parma                | 2000-2014       | 1,067              | 0.0              | 74.9    | 0.0   | 268               | 0.0 | 0.0   | 268                            | 99.3  | 1.5                     | 2.6               | 0.0      |
| Pavia                | 2003-2009       | 221                | 0.0              | 0.9     | 0.0   | 219               | 0.0 | 0.5   | 218                            | 92.2  | 10.1                    | 0.5               | 1.4      |
| Piacenza             | 2006-2011       | 71                 | 0.0              | 0.0     | 0.0   | 71                | 0.0 | 0.0   | 71                             | 93.0  | 7.0                     | 2.8               | 9.9      |
| Ragusa               | 2000-2012       | 344                | 0.0              | 42.2    | 0.3   | 198               | 0.0 | 0.0   | 198                            | 98.5  | 2.5                     | 1.0               | 0.0      |
| Reggio Emilia        | 2000-2012       | 216                | 0.0              | 0.0     | 0.0   | 216               | 0.0 | 0.5   | 215                            | 98.1  | 1.9                     | 4.7               | 0.0      |
| Romagna              | 2000-2012       | 3,746              | 0.0              | 80.1    | 0.0   | 745               | 0.1 | 0.0   | 744                            | 98.1  | 1.9                     | 0.1               | 0.0      |
| Salerno              | 2000-2009       | 396                | 0.0              | 0.0     | 0.0   | 396               | 0.0 | 0.8   | 393                            | 93.4  | 6.9                     | 1.0               | 5.6      |
| Sassari              | 2000-2011       | 205                | 0.0              | 0.0     | 0.0   | 205               | 0.0 | 0.0   | 205                            | 98.0  | 5.4                     | 0.0               | 0.0      |
| Siracusa             | 2000-2012       | 212                | 0.0              | 0.0     | 0.0   | 212               | 0.0 | 0.5   | 211                            | 95.7  | 5.2                     | 0.0               | 1.9      |
| Sondrio              | 2000-2011       | 109                | 0.0              | 0.0     | 0.0   | 109               | 0.0 | 0.9   | 108                            | 98.1  | 1.9                     | 1.9               | 0.0      |
| Taranto              | 2006-2012       | 142                | 0.0              | 0.0     | 0.0   | 142               | 0.0 | 0.0   | 142                            | 99.3  | 1.4                     | 4.2               | 0.0      |
| Trapani              | 2002-2010       | 141                | 0.0              | 0.0     | 0.0   | 141               | 0.0 | 0.0   | 141                            | 95.7  | 6.4                     | 2.1               | 2.1      |
| Trento               | 2000-2010       | 201                | 0.0              | 0.0     | 0.0   | 201               | 0.5 | 0.5   | 199                            | 98.0  | 3.0                     | 7.0               | 0.0      |
| Turin                | 2000-2012       | 1,885              | 0.0              | 70.6    | 0.1   | 552               | 0.4 | 0.0   | 550                            | 98.0  | 2.5                     | 2.5               | 0.0      |
| Tuscany              | 2000-2009       | 1,894              | 0.0              | 69.3    | 0.5   | 572               | 0.0 | 0.7   | 568                            | 96.1  | 4.2                     | 0.0               | 3.7      |
| Umbria               | 2000-2013       | 566                | 0.0              | 0.0     | 0.0   | 566               | 0.0 | 0.0   | 566                            | 95.8  | 4.8                     | 0.5               | 0.9      |
| Varese               | 2000-2012       | 464                | 0.0              | 0.0     | 0.2   | 463               | 0.0 | 0.2   | 462                            | 97.8  | 2.4                     | 1.7               | 0.4      |
| Veneto               | 2000-2009       | 827                | 0.0              | 0.0     | 0.0   | 827               | 0.1 | 0.0   | 826                            | 98.8  | 1.8                     | 2.8               | 2.3      |
| Viterbo              | 2006-2010       | 41                 | 0.0              | 0.0     | 0.0   | 41                | 0.0 | 0.0   | 41                             | 95.1  | 4.9                     | 2.4               | 36.6     |
| Piedmont Childhood   | -               | -                  | -                | -       | -     | -                 | -   | -     | -                              | -     | -                       | -                 | -        |
| Latvia *             | 2000-2014       | 3,452              | 0.0              | 0.5     | 8.1   | 3,156             | 0.0 | 0.3   | 3,148                          | 100.0 | 0.7                     | 0.0               | 0.0      |
| Lithuania *          | 2000-2012       | 11,922             | 0.0              | 45.6    | 0.0   | 6,478             | 2.5 | 0.0   | 6,318                          | 92.1  | 0.4                     | 0.0               | 0.9      |
| Malta *              | 2000-2013       | 1,034              | 0.0              | 86.1    | 0.6   | 138               | 1.4 | 0.0   | 136                            | 99.3  | 1.5                     | 0.0               | 0.0      |
| Netherlands *        | 2000-2014       | 10,422             | 0.0              | 0.0     | 0.0   | 10,422            | 0.0 | 1.0   | 10,317                         | 99.8  | 0.3                     | 2.0               | 0.0      |
| Norway *             | 2000-2014       | 132,583            | 0.0              | 30.0    | 66.6  | 4,482             | 0.1 | 0.4   | 4,458                          | 100.0 | 0.2                     | 0.6               | 0.0      |
| Poland *             | 2000-2014       | 50,277             | 0.0              | 1.7     | 0.0   | 49,435            | 0.8 | 0.3   | 48,857                         | 96.7  | 0.2                     | 0.0               | 0.0      |
| Greater Poland       | 2000-2014       | 3,880              | 0.0              | 0.0     | 0.0   | 3,880             | 1.5 | 0.3   | 3,811                          | 97.9  | 0.3                     | 0.0               | 0.0      |
| Holy Cross           | 2000-2014       | 1,623              | 0.0              | 0.1     | 0.0   | 1,621             | 0.4 | 0.2   | 1,610                          | 96.9  | 0.4                     | 0.0               | 0.0      |
| Kujavia-Pomerania    | 2000-2014       | 2,652              | 0.0              | 0.0     | 0.0   | 2,652             | 0.5 | 0.5   | 2,627                          | 97.7  | 0.1                     | 0.0               | 0.0      |
| Lesser Poland        | 2000-2014       | 4,035              | 0.0              | 0.0     | 0.0   | 4,034             | 1.1 | 0.2   | 3,981                          | 97.9  | 0.5                     | 0.0               | 0.0      |
| Łódź                 | 2000-2014       | 3,424              | 0.0              | 0.0     | 0.0   | 3,423             | 0.2 | 1.2   | 3,375                          | 94.1  | 0.1                     | 0.0               | 0.0      |
| Lower Silesia        | 2000-2014       | 4,916              | 0.0              | 16.5    | 0.0   | 4,104             | 0.1 | 0.0   | 4,096                          | 93.5  | 0.1                     | 0.6               | 0.0      |
| Lublin               | 2000-2014       | 2,640              | 0.0              | 0.0     | 0.0   | 2,639             | 1.3 | 0.1   | 2,601                          | 98.4  | 0.0                     | 0.0               | 0.0      |
| Lubush               | 2000-2014       | 1,476              | 0.0              | 1.0     | 0.1   | 1,460             | 0.9 | 0.3   | 1,442                          | 98.1  | 0.1                     | 0.0               | 0.0      |
| Mazovia              | 2000-2014       | 6,322              | 0.0              | 0.0     | 0.0   | 6,320             | 0.0 | 0.1   | 6,316                          | 96.9  | 0.0                     | 0.0               | 0.0      |
| Opole                | 2000-2014       | 1,342              | 0.0              | 0.0     | 0.0   | 1,342             | 0.1 | 0.2   | 1,338                          | 99.1  | 0.1                     | 0.0               | 0.0      |
| Podlaha              | 2000-2014       | 1,661              | 0.0              | 0.0     | 0.0   | 1,661             | 1.5 | 0.1   | 1,634                          | 98.3  | 0.4                     | 0.0               | 0.0      |
| Pomerania            | 2000-2014       | 3,493              | 0.0              | 0.0     | 0.0   | 3,492             | 3.2 | 0.5   | 3,363                          | 98.7  | 0.0                     | 0.0               | 0.0      |
| Silesia              | 2000-2014       | 6,141              | 0.0              | 0.0     | 0.0   | 6,141             | 0.5 | 0.1   | 6,106                          | 97.6  | 0.1                     | 0.0               | 0.0      |
| Subcarpathia         | 2000-2014       | 2,261              | 0.0              | 0.0     | 0.0   | 2,261             | 0.6 | 1.0   | 2,224                          | 99.0  | 0.2                     | 0.0               | 0.0      |
| Varmia-Mazuria       | 2000-2014       | 1,936              | 0.0              | 0.2     | 0.0   | 1,932             | 0.0 | 0.1   | 1,931                          | 98.9  | 0.3                     | 0.0               | 0.1      |
| West Pomerania       | 2000-2014       | 2,475              | 0.0              | 0.1     | 0.0   | 2,473             | 2.1 | 0.7   | 2,402                          | 86.3  | 0.1                     | 0.0               | 0.0      |
| Portugal *           | 2000-2014       | 14,652             | 0.2              | 38.0    | 0.3   | 9,020             | 0.0 | 0.1   | 9,013                          | 99.2  | 1.0                     | 2.4               | 0.0      |
| Azores               | 2000-2014       | 236                | 0.0              | 0.0     | 0.0   | 236               | 0.8 | 0.0   | 234                            | 100.0 | 0.0                     | 0.0               | 1.3      |
| Portugal Central     | 2003-2010       | 1,033              | 0.4              | 0.0     | 0.0   | 1,029             | 0.0 | 0.0   | 1,029                          | 98.8  | 1.9                     | 0.5               | 0.0      |
| Portugal North       | 2000-2014       | 2,497              | 1.1              | 0.0     | 0.1   | 2,468             | 0.0 | 0.0   | 2,468                          | 99.1  | 1.3                     | 0.0               | 0.0      |
| Portugal South       | 2000-2014       | 10,886             | 0.0              | 51.1    | 0.3   | 5,287             | 0.0 | 0.1   | 5,282                          | 99.2  | 0.7                     | 4.0               | 0.0      |
| Romania (Cluj)       | 2006-2012       | 1,446              | 0.0              | 26.4    | 0.0   | 1,064             | 5.6 | 0.0   | 1,004                          | 96.2  | 3.9                     | 0.0               | 0.0      |
| Russian registries ‡ | 2000-2014       | 12,140             | 0.0              | 9.5     | 0.0   | 10,987            | 0.2 | 0.6   | 10,897                         | 98.1  | 1.3                     | 3.1               | 3.1      |
| Arkhangelsk          | 2000-2014       | 2,200              | 0.0              | 18.9    | 0.0   | 1,785             | 0.2 | 0.4   | 1,773                          | 98.1  | 1.5                     | 1.7               | 0.0      |
| Karelia              | 2000-2014       | 2,061              | 0.0              | 29.6    | 0.0   | 1,449             | 0.3 | 1.2   | 1,428                          | 99.0  | 3.9                     | 1.9               | 9.3      |
| Omsk                 | 2002-2014       | 2,200              | 0.0              | 0.0     | 0.0   | 2,200             | 0.0 | 0.3   | 2,193                          | 99.7  | 1.7                     | 7.0               | 7.3      |
| Samara               | 2000-2014       | 4,155              | 0.0              | 0.0     | 0.0   | 4,153             | 0.3 | 0.4   | 4,126                          | 97.1  | 0.7                     | 1.9               | 0.0      |
| Tomsk                | 2005-2014       | 1,524              | 0.0              | 8.1     | 0.0   | 1,400             | 0.0 | 1.6   | 1,377                          | 97.5  | 0.0                     | 3.6               | 2.9      |
| Slovakia *           | 2000-2010       | 10,826             | 0.0              | 41.5    | 0.0   | 6,325             | 2.5 | 0.0   | 6,170                          | 99.3  | 0.8                     | 0.0               | 0.0      |
| Slovenia *           | 2000-2013       | 15,891             | 0.0              | 85.6    | 0.0   | 2,286             | 0.2 | 0.0   | 2,281                          | 99.6  | 0.0                     | 0.0               | 0.0      |
| Spanish registries   | 2000-2013       | 18,471             | 0.6              | 70.4    | 1.6   | 5,059             | 0.5 | 0.2   | 5,023                          | 99.0  | 0.5                     | 1.1               | 0.0      |
| Basque Country       | 2000-2013       | 5,134              | 0.0              | 76.2    | 0.1   | 1,216             | 0.5 | 0.2   | 1,208                          | 98.8  | 0.3                     | 1.2               | 0.0      |
| Canaries             | 2000-2011       | 5,557              | 0.0              | 80.2    | 0.0   | 1,102             | 0.3 | 0.2   | 1,097                          | 98.6  | 0.2                     | 0.0               | 0.0      |
| Girona               | 2000-2013       | 2,201              | 1.0              | 69.2    | 12.6  | 377               | 0.5 | 0.0   | 375                            | 99.2  | 1.6                     | 5.9               | 0.0      |
| Granada              | 2000-2012       | 450                | 0.0              | 0.0     | 0.2   | 449               | 0.9 | 0.0   | 445                            | 98.2  | 0.0                     | 0.7               | 0.0      |
| Mallorca             | 2000-2012       | 2,052              | 2.1              | 69.3    | 0.0   | 585               | 0.0 | 0.3   | 583                            | 99.5  | 0.2                     | 2.1               | 0.0      |
| Murcia               | 2000-2010       | 694                | 0.0              | 0.0     | 0.1   | 693               | 0.3 | 0.3   | 689                            | 99.0  | 1.7                     | 0.0               | 0.0      |
| Navarra              | 2000-2010       | 840                | 0.0              | 76.7    | 0.0   | 196               | 0.5 | 0.0   | 195                            | 100.0 | 0.0                     | 1.0               | 0.0      |
| Tarragona            | 2000-2011       | 1,543              | 3.4              | 67.9    | 0.2   | 441               | 2.0 | 0.2   | 431                            | 99.8  | 0.5                     | 0.0               | 0.0      |
| Spain Childhood      | -               | -                  | -                | -       | -     | -                 | -   | -     | -                              | -     | -                       | -                 | -        |
| Valencia Childhood   | -               | -                  | -                | -       | -     | -                 | -   | -     | -                              | -     | -                       | -                 | -        |
| Sweden *             | 2000-2014       | 65,634             | 0.0              | 83.1    | 6.4   | 6,858             | 0.4 | 0.2   | 6,816                          | 99.9  | 0.2                     | 0.4               | 0.1      |
| Swiss registries     | 2000-2014       | 11,762             | 0.0              | 83.9    | 0.1   | 1,880             | 0.5 | 0.7   | 1,858                          | 99.7  | 0.2                     | 8.4               | 8.0      |
| Basel                | 2000-2011       | 124                | 0.0              | 0.0     | 0.0   | 124               | 0.0 | 5.6   | 117                            | 100.0 | 0.0                     | 2.6               | 14.5     |
| Fribourg             | 2006-2014       | 540                | 0.0              | 90.2    | 0.0   | 53                | 0.0 | 3.8   | 51                             | 100.0 | 0.0                     | 7.8               | 0.0      |
| Geneva               | 2000-2013       | 2,393              | 0.0              | 93.3    | 0.0   | 160               | 0.6 | 0.0   | 159                            | 100.0 | 0.6                     | 9.4               | 0.0      |
| Graubünden-Glarus    | 2000-2014       | 899                | 0.0              | 82.6    | 0.3   | 153               | 0.0 | 2.6   | 149                            | 100.0 | 0.0                     | 53.0              | 0.0      |
| Neuchâtel            | 2000-2014       | 407                | 0.0              | 84.5    | 0.0   | 63                | 0.0 | 0.0   | 63                             | 98.4  | 0.0                     | 7.9               | 3.2      |
| St Gallen-Appenzell  | 2000-2014       | 2,095              | 0.0              | 85.1    | 0.0   | 312               | 0.3 | 0.0   | 311                            | 99.0  | 0.0                     | 7.7               | 0.0      |
| Ticino               | 2000-2014       | 549                | 0.0              | 59.9    | 0.0   | 220               | 0.5 | 0.0   | 219                            | 100.0 | 0.0                     | 3.2               | 0.0      |
| Valais               | 2000-2014       | 1,084              | 0.0              | 87.3    | 0.1   | 137               | 0.0 | 0.0   | 137                            | 99.3  | 0.0                     | 2.2               | 0.0      |

Web-table 2.10: Data quality indicators, women diagnosed during 2000-2014, by continent, country and registry: CERVIX

|                              | Calendar period | Patients submitted | Ineligible (%) ¶ |             |            | Eligible patients | Excluded (%) ¶¶ |            | Patients included | Data quality indicators (%) †† |                         |                   |            |
|------------------------------|-----------------|--------------------|------------------|-------------|------------|-------------------|-----------------|------------|-------------------|--------------------------------|-------------------------|-------------------|------------|
|                              |                 |                    | Incomplete dates | In situ     | Other      |                   | DCO             | Other      |                   | MV                             | Non-specific morphology | Lost to follow-up | Censored   |
| Zürich                       | 2000-2013       | 3,671              | 0.0              | 82.0        | 0.1        | 658               | 0.9             | 0.0        | 652               | 99.8                           | 0.3                     | 2.5               | 19.9       |
| Switzerland (Childhood) †    | -               | -                  |                  |             |            |                   |                 |            |                   |                                |                         |                   |            |
| United Kingdom *             | 2000-2014       | 453,392            | 0.0              | 90.0        | 0.0        | 45,236            | 0.6             | 0.4        | 44,814            | 99.1                           | 1.0                     | 3.2               | 0.0        |
| England                      | 2000-2014       | 369,793            | 0.0              | 90.0        | 0.0        | 36,765            | 0.6             | 0.4        | 36,380            | 99.1                           | 1.2                     | 3.9               | 0.0        |
| Northern Ireland             | 2000-2014       | 16,857             | 0.4              | 91.0        | 0.3        | 1,392             | 0.4             | 0.0        | 1,387             | 98.8                           | 1.2                     | 0.0               | 0.0        |
| Scotland                     | 2000-2014       | 44,028             | 0.0              | 89.5        | 0.0        | 4,630             | 0.2             | 0.0        | 4,622             | 98.3                           | 0.1                     | 0.3               | 0.0        |
| Wales                        | 2000-2014       | 22,714             | 0.0              | 89.2        | 0.0        | 2,449             | 0.7             | 0.3        | 2,425             | 99.5                           | 0.7                     | 0.0               | 0.0        |
| <b>OCEANIA</b>               |                 | <b>77,241</b>      | <b>0.2</b>       | <b>81.9</b> | <b>0.1</b> | <b>13,711</b>     | <b>0.8</b>      | <b>0.5</b> | <b>13,537</b>     | <b>98.6</b>                    | <b>1.6</b>              | <b>0.0</b>        | <b>0.0</b> |
| Australia *                  | 2000-2014       | 74,729             | 0.2              | 84.7        | 0.1        | 11,199            | 0.7             | 0.5        | 11,065            | 98.8                           | 1.3                     | 0.0               | 0.0        |
| Australian Capital Territory | 2000-2013       | 1,148              | 0.0              | 87.8        | 0.3        | 136               | 0.7             | 0.7        | 134               | 100.0                          | 0.0                     | 0.0               | 0.0        |
| New South Wales              | 2000-2012       | 3,283              | 0.2              | 0.0         | 0.3        | 3,266             | 0.9             | 0.8        | 3,212             | 99.3                           | 1.2                     | 0.0               | 0.0        |
| Northern Territory           | 2000-2013       | 144                | 0.0              | 0.0         | 0.0        | 144               | 0.0             | 0.0        | 144               | 100.0                          | 0.7                     | 0.0               | 0.0        |
| Queensland                   | 2000-2014       | 33,357             | 0.5              | 90.8        | 0.1        | 2,855             | 0.8             | 0.2        | 2,827             | 97.7                           | 2.4                     | 0.0               | 0.0        |
| South Australia              | 2000-2013       | 724                | 0.0              | 0.0         | 0.0        | 724               | 0.3             | 0.8        | 716               | 98.3                           | 0.4                     | 0.0               | 0.0        |
| Tasmania                     | 2000-2013       | 375                | 0.0              | 26.4        | 0.0        | 276               | 1.1             | 1.4        | 269               | 99.6                           | 0.4                     | 0.0               | 0.0        |
| Victoria                     | 2000-2014       | 34,426             | 0.0              | 92.7        | 0.0        | 2,526             | 0.8             | 0.3        | 2,497             | 99.1                           | 1.0                     | 0.0               | 0.0        |
| Western Australia            | 2000-2014       | 1,272              | 0.0              | 0.0         | 0.0        | 1,272             | 0.2             | 0.3        | 1,266             | 99.3                           | 0.9                     | 0.0               | 0.0        |
| New Zealand *                | 2000-2014       | 2,512              | 0.0              | 0.0         | 0.0        | 2,512             | 1.0             | 0.6        | 2,472             | 98.0                           | 2.5                     | 0.0               | 0.1        |
| <b>Total</b>                 |                 | <b>1,708,385</b>   | <b>0.4</b>       | <b>54.6</b> | <b>5.5</b> | <b>674,098</b>    | <b>1.3</b>      | <b>0.7</b> | <b>660,744</b>    | <b>97.8</b>                    | <b>2.4</b>              | <b>1.3</b>        | <b>1.7</b> |

Web-table 2.11: Data quality indicators, women diagnosed during 2000-2014, by continent, country and registry: OVARY

|                                    | Calendar period | Patients submitted | Ineligible (%) ¶ |            |            | Excluded (%) ¶¶   |            |            | Data quality indicators (%) ¶¶ |             |                         |                   |             |
|------------------------------------|-----------------|--------------------|------------------|------------|------------|-------------------|------------|------------|--------------------------------|-------------|-------------------------|-------------------|-------------|
|                                    |                 |                    | Incomplete dates | In situ    | Other      | Eligible patients | DCO        | Other      | Patients included              | MV          | Non-specific morphology | Lost to follow-up | Censored    |
| <b>AFRICA</b>                      |                 | <b>1,341</b>       | <b>16.6</b>      | <b>0.0</b> | <b>5.2</b> | <b>1,049</b>      | <b>0.3</b> | <b>3.4</b> | <b>1,010</b>                   | <b>94.4</b> | <b>14.7</b>             | <b>3.2</b>        | <b>30.7</b> |
| Algerian registries                | 2000-2014       | 496                | 9.9              | 0.0        | 1.0        | 442               | 0.5        | 3.8        | 423                            | 96.5        | 10.4                    | 0.0               | 25.8        |
| Annaba                             | 2000-2014       | 124                | 16.9             | 0.0        | 0.0        | 103               | 1.0        | 1.0        | 101                            | 86.1        | 0.0                     | 0.0               | 93.1        |
| Sétif                              | 2000-2010       | 148                | 18.9             | 0.0        | 1.4        | 118               | 0.0        | 5.1        | 112                            | 99.1        | 22.3                    | 0.0               | 13.4        |
| Tlemcen                            | 2006-2014       | 224                | 0.0              | 0.0        | 1.3        | 221               | 0.5        | 4.5        | 210                            | 100.0       | 9.0                     | 0.0               | 0.0         |
| Mali (Bamako)                      | -               | -                  | -                | -          | -          | -                 | -          | -          | -                              | -           | -                       | -                 | -           |
| Mauritius *                        | 2005-2009       | 250                | 0.0              | 0.0        | 0.8        | 248               | 0.0        | 1.6        | 244                            | 98.0        | 26.6                    | 0.0               | 0.0         |
| Morocco (Casablanca)               | -               | -                  | -                | -          | -          | -                 | -          | -          | -                              | -           | -                       | -                 | -           |
| Nigeria (Ibadan)                   | 2005-2014       | 474                | 36.5             | 0.0        | 12.7       | 241               | 0.4        | 6.2        | 225                            | 99.6        | 0.4                     | 0.0               | 73.3        |
| South Africa (Eastern Cape)        | 2000-2014       | 121                | 0.0              | 0.0        | 2.5        | 118               | 0.0        | 0.0        | 118                            | 69.5        | 32.2                    | 27.1              | 30.5        |
| <b>AMERICA (Central and South)</b> |                 | <b>18,652</b>      | <b>2.0</b>       | <b>0.1</b> | <b>2.7</b> | <b>17,760</b>     | <b>8.6</b> | <b>1.1</b> | <b>16,023</b>                  | <b>92.8</b> | <b>8.7</b>              | <b>0.3</b>        | <b>3.8</b>  |
| Argentinian registries             | 2002-2013       | 2,043              | 3.7              | 0.0        | 4.4        | 1,877             | 10.0       | 0.1        | 1,688                          | 96.3        | 7.6                     | 0.0               | 0.1         |
| Chubut                             | 2008-2013       | 118                | 64.4             | 0.0        | 0.0        | 42                | 4.8        | 2.4        | 39                             | 69.2        | 33.3                    | 0.0               | 2.6         |
| Córdoba                            | 2004-2012       | 881                | 0.0              | 0.1        | 8.1        | 809               | 10.9       | 0.1        | 720                            | 97.2        | 8.1                     | 0.0               | 0.0         |
| Mendoza                            | 2003-2013       | 1,044              | 0.0              | 0.0        | 1.7        | 1,026             | 9.5        | 0.0        | 929                            | 96.7        | 6.1                     | 0.0               | 0.0         |
| Tierra del Fuego                   | -               | -                  | -                | -          | -          | -                 | -          | -          | -                              | -           | -                       | -                 | -           |
| Argentina (Childhood) †            | -               | -                  | -                | -          | -          | -                 | -          | -          | -                              | -           | -                       | -                 | -           |
| Brazilian registries               | 2000-2014       | 1,408              | 0.3              | 0.0        | 3.2        | 1,359             | 9.7        | 1.9        | 1,201                          | 96.3        | 4.9                     | 0.0               | 0.2         |
| Aracaju                            | 2000-2012       | 294                | 0.3              | 0.0        | 3.4        | 283               | 6.0        | 0.7        | 264                            | 95.5        | 7.2                     | 0.0               | 0.0         |
| Cuiabá                             | -               | -                  | -                | -          | -          | -                 | -          | -          | -                              | -           | -                       | -                 | -           |
| Curitiba                           | 2000-2012       | 1,026              | 0.2              | 0.0        | 3.2        | 991               | 11.5       | 2.4        | 853                            | 96.7        | 4.0                     | 0.0               | 0.0         |
| Goiânia                            | -               | -                  | -                | -          | -          | -                 | -          | -          | -                              | -           | -                       | -                 | -           |
| Jaú                                | 2000-2014       | 88                 | 1.1              | 0.0        | 2.3        | 85                | 1.2        | 0.0        | 84                             | 95.2        | 7.1                     | 0.0               | 3.6         |
| São Paulo                          | -               | -                  | -                | -          | -          | -                 | -          | -          | -                              | -           | -                       | -                 | -           |
| Chilean registries                 | 2000-2012       | 752                | 0.0              | 0.0        | 1.2        | 743               | 5.7        | 0.4        | 698                            | 81.1        | 17.0                    | 0.0               | 13.9        |
| Antofagasta                        | 2003-2010       | 131                | 0.0              | 0.0        | 1.5        | 129               | 13.2       | 0.0        | 112                            | 88.4        | 13.4                    | 0.0               | 13.4        |
| Biobio                             | 2003-2012       | 174                | 0.0              | 0.0        | 0.6        | 173               | 3.5        | 1.7        | 164                            | 67.1        | 39.0                    | 0.0               | 6.7         |
| Concepción                         | 2006-2010       | 238                | 0.0              | 0.0        | 1.3        | 235               | 5.5        | 0.0        | 222                            | 82.9        | 17.1                    | 0.0               | 17.6        |
| Los Rios                           | 2000-2012       | 209                | 0.0              | 0.0        | 1.4        | 206               | 2.9        | 0.0        | 200                            | 86.5        | 1.0                     | 0.0               | 16.0        |
| Colombian registries               | 2000-2014       | 1,950              | 2.4              | 0.0        | 2.1        | 1,863             | 4.6        | 1.0        | 1,759                          | 86.0        | 16.1                    | 0.0               | 23.8        |
| Bucaramanga                        | -               | -                  | -                | -          | -          | -                 | -          | -          | -                              | -           | -                       | -                 | -           |
| Cali                               | 2000-2014       | 1,590              | 1.0              | 0.0        | 1.9        | 1,543             | 4.9        | 1.0        | 1,453                          | 85.4        | 16.0                    | 0.0               | 26.7        |
| Manizales                          | 2003-2012       | 155                | 13.5             | 0.0        | 0.0        | 134               | 0.7        | 2.2        | 130                            | 85.4        | 20.0                    | 0.0               | 23.1        |
| Pasto                              | 2000-2012       | 205                | 4.4              | 0.0        | 4.9        | 186               | 4.8        | 0.5        | 176                            | 90.9        | 13.6                    | 0.0               | 0.0         |
| Costa Rica *                       | 2002-2014       | 1,652              | 0.0              | 0.0        | 3.8        | 1,589             | 8.1        | 3.3        | 1,408                          | 84.6        | 20.7                    | 0.0               | 0.0         |
| Cuba *                             | 2000-2012       | 5,164              | 0.0              | 0.0        | 0.5        | 5,137             | 10.7       | 0.5        | 4,560                          | 98.2        | 0.0                     | 0.6               | 0.0         |
| Ecuadorian registries              | 2000-2013       | 2,102              | 7.7              | 0.1        | 4.5        | 1,843             | 4.8        | 1.2        | 1,732                          | 90.2        | 12.6                    | 0.3               | 3.2         |
| Cuenca                             | 2000-2012       | 218                | 35.3             | 0.0        | 7.8        | 124               | 7.3        | 0.8        | 114                            | 86.0        | 16.7                    | 0.0               | 28.9        |
| Guayaquil                          | 2005-2013       | 611                | 0.0              | 0.0        | 5.7        | 576               | 2.3        | 3.8        | 541                            | 90.2        | 11.6                    | 0.0               | 0.2         |
| Loja                               | 2000-2013       | 98                 | 0.0              | 0.0        | 4.1        | 94                | 0.0        | 0.0        | 94                             | 86.2        | 18.1                    | 5.3               | 0.0         |
| Manabí                             | 2000-2013       | 293                | 7.8              | 0.3        | 6.8        | 249               | 6.8        | 0.0        | 232                            | 88.4        | 15.1                    | 0.0               | 0.9         |
| Quito                              | 2000-2013       | 882                | 7.0              | 0.1        | 2.2        | 800               | 6.1        | 0.0        | 751                            | 91.9        | 11.3                    | 0.0               | 2.5         |
| Guadeloupe *                       | 2008-2013       | 125                | 0.0              | 0.0        | 11.2       | 111               | 0.0        | 0.9        | 110                            | 97.3        | 9.1                     | 0.0               | 32.7        |
| Martinique *                       | 2000-2012       | 202                | 0.0              | 0.0        | 0.0        | 202               | 0.0        | 5.4        | 191                            | 96.3        | 2.6                     | 9.9               | 0.0         |
| Mexico (Childhood) †               | -               | -                  | -                | -          | -          | -                 | -          | -          | -                              | -           | -                       | -                 | -           |
| Peru (Lima)                        | -               | -                  | -                | -          | -          | -                 | -          | -          | -                              | -           | -                       | -                 | -           |
| Puerto Rico *                      | 2000-2011       | 2,057              | 3.7              | 0.5        | 2.9        | 1,911             | 7.7        | 1.8        | 1,728                          | 97.2        | 6.5                     | 0.0               | 0.0         |
| Uruguay *                          | 2008-2012       | 1,197              | 0.0              | 0.6        | 5.4        | 1,125             | 15.3       | 0.4        | 948                            | 84.6        | 17.4                    | 0.0               | 0.0         |
| <b>AMERICA (North)</b>             |                 | <b>337,562</b>     | <b>0.5</b>       | <b>0.6</b> | <b>1.9</b> | <b>327,087</b>    | <b>2.0</b> | <b>2.3</b> | <b>312,954</b>                 | <b>96.1</b> | <b>5.0</b>              | <b>1.1</b>        | <b>0.0</b>  |
| Canadian registries                | 2000-2014       | 35,273             | 0.1              | 0.4        | 6.6        | 32,781            | 1.5        | 2.7        | 31,395                         | 90.1        | 10.4                    | 0.0               | 0.0         |
| Alberta                            | 2000-2014       | 3,679              | 0.1              | 1.7        | 2.3        | 3,527             | 0.5        | 5.8        | 3,304                          | 96.3        | 5.1                     | 0.0               | 0.0         |
| British Columbia                   | 2000-2014       | 7,328              | 0.3              | 0.4        | 25.0       | 5,449             | 1.4        | 3.8        | 5,162                          | 95.1        | 5.3                     | 0.0               | 0.0         |
| Manitoba                           | 2000-2014       | 1,624              | 0.0              | 0.8        | 2.9        | 1,564             | 1.2        | 2.2        | 1,510                          | 95.1        | 5.8                     | 0.0               | 0.0         |
| New Brunswick                      | 2000-2014       | 998                | 0.1              | 0.3        | 2.4        | 970               | 0.5        | 0.4        | 961                            | 90.2        | 0.4                     | 0.0               | 0.0         |
| Newfoundland & Labrador            | 2000-2014       | 850                | 0.4              | 1.2        | 28.8       | 592               | 2.2        | 2.7        | 563                            | 95.4        | 6.4                     | 0.0               | 0.0         |
| Nova Scotia                        | 2000-2014       | 1,196              | 0.3              | 0.6        | 2.8        | 1,152             | 1.3        | 2.6        | 1,107                          | 88.9        | 12.1                    | 0.0               | 0.1         |
| Ontario                            | 2000-2014       | 18,090             | 0.0              | 0.0        | 0.0        | 18,090            | 1.8        | 1.9        | 17,412                         | 86.7        | 14.1                    | 0.0               | 0.0         |
| Prince Edward Island               | 2000-2014       | 206                | 0.0              | 0.5        | 23.8       | 156               | 1.9        | 0.6        | 152                            | 87.5        | 14.5                    | 0.0               | 0.0         |
| Saskatchewan                       | 2000-2014       | 1,302              | 0.1              | 0.6        | 0.9        | 1,281             | 1.9        | 2.6        | 1,224                          | 94.2        | 6.4                     | 0.0               | 0.0         |
| US registries                      | 2000-2014       | 302,289            | 0.6              | 0.7        | 1.4        | 294,306           | 2.0        | 2.3        | 281,559                        | 96.8        | 4.4                     | 1.2               | 0.0         |
| Alabama                            | 2000-2014       | 5,894              | 0.6              | 0.4        | 1.1        | 5,773             | 2.1        | 2.1        | 5,526                          | 96.2        | 4.7                     | 0.0               | 0.0         |
| Alaska                             | 2000-2013       | 566                | 2.7              | 0.5        | 1.8        | 538               | 1.1        | 1.5        | 524                            | 97.3        | 4.4                     | 0.0               | 0.0         |
| Arkansas                           | 2000-2011       | 2,481              | 0.2              | 0.4        | 1.7        | 2,424             | 2.6        | 2.2        | 2,307                          | 97.7        | 3.4                     | 0.0               | 0.0         |
| California                         | 2000-2011       | 34,061             | 1.2              | 0.8        | 1.9        | 32,755            | 0.9        | 3.2        | 31,411                         | 97.3        | 3.4                     | 0.0               | 0.0         |
| Greater Bay Area                   | 2000-2014       | 8,543              | 0.8              | 0.8        | 1.5        | 8,273             | 1.1        | 3.7        | 7,870                          | 98.2        | 2.5                     | 5.6               | 0.0         |
| Greater California                 | 2000-2014       | 23,135             | 1.3              | 0.8        | 1.5        | 22,293            | 0.9        | 3.0        | 21,411                         | 96.6        | 4.3                     | 5.6               | 0.0         |
| Los Angeles                        | 2000-2014       | 11,414             | 1.0              | 1.0        | 1.6        | 11,001            | 0.9        | 2.6        | 10,618                         | 97.7        | 2.8                     | 12.7              | 0.0         |
| Colorado                           | 2000-2013       | 5,344              | 0.2              | 0.8        | 1.3        | 5,219             | 3.3        | 2.4        | 4,921                          | 96.9        | 3.9                     | 0.0               | 0.0         |
| Connecticut                        | 2000-2014       | 5,137              | 0.2              | 0.9        | 1.2        | 5,018             | 1.5        | 2.1        | 4,838                          | 97.8        | 3.3                     | 4.3               | 0.0         |
| Delaware                           | 2000-2014       | 1,159              | 0.4              | 0.6        | 2.4        | 1,119             | 2.1        | 2.6        | 1,066                          | 97.8        | 3.1                     | 0.0               | 0.0         |
| Florida                            | 2000-2013       | 24,099             | 0.1              | 0.4        | 0.5        | 23,852            | 2.3        | 1.5        | 22,941                         | 97.0        | 5.8                     | 0.0               | 0.0         |
| Georgia                            | 2000-2014       | 10,227             | 0.0              | 0.6        | 1.3        | 10,026            | 1.8        | 2.1        | 9,627                          | 96.8        | 4.7                     | 0.0               | 0.0         |
| Atlanta                            | 2000-2014       | 3,319              | 0.0              | 0.6        | 1.2        | 3,258             | 1.5        | 2.4        | 3,133                          | 98.0        | 3.7                     | 0.0               | 0.0         |
| Hawaii                             | 2000-2014       | 1,454              | 0.1              | 1.5        | 1.2        | 1,412             | 1.0        | 2.5        | 1,362                          | 96.7        | 4.8                     | 2.6               | 0.1         |
| Idaho                              | 2000-2014       | 1,704              | 0.4              | 0.6        | 1.1        | 1,669             | 3.2        | 2.8        | 1,570                          | 96.7        | 4.4                     | 0.0               | 0.0         |
| Indiana                            | 2000-2014       | 7,990              | 0.4              | 0.6        | 1.4        | 7,801             | 1.8        | 2.5        | 7,464                          | 96.9        | 3.9                     | 0.0               | 0.0         |
| Iowa                               | 2000-2014       | 4,514              | 0.3              | 0.8        | 1.8        | 4,385             | 2.0        | 2.9        | 4,171                          | 95.9        | 5.0                     | 1.4               | 0.0         |
| Kentucky                           | 2000-2014       | 5,406              | 0.0              | 0.9        | 1.6        | 5,270             | 1.1        | 3.1        | 5,046                          | 95.3        | 5.2                     | 1.0               | 0.0         |
| Louisiana                          | 2000-2014       | 4,771              | 0.4              | 0.7        | 1.7        | 4,635             | 1.8        | 2.4        | 4,441                          | 97.5        | 3.5                     | 2.4               | 0.0         |
| Maine                              | 2000-2013       | 1,844              | 0.2              | 0.7        | 2.1        | 1,791             | 1.7        | 2.7        | 1,712                          | 97.3        | 3.0                     | 0.0               | 0.0         |
| Massachusetts                      | 2000-2009       | 6,357              | 0.0              | 0.6        | 2.1        | 6,185             | 1.7        | 2.2        | 5,943                          | 95.4        | 5.1                     | 0.0               | 0.0         |
| Michigan                           | 2000-2013       | 12,480             | 0.4              | 0.6        | 0.7        | 12,271            | 1.3        | 2.2        | 11,843                         | 95.6        | 5.5                     | 0.0               | 0.0         |

Web-table 2.11: Data quality indicators, women diagnosed during 2000-2014, by continent, country and registry: OVARY

|                     | Calendar period | Patients submitted | Ineligible (%) ¶ |            |            | Excluded (%) ¶¶   |            |            | Patients included | Data quality indicators (%) †† |                         |                   |            |
|---------------------|-----------------|--------------------|------------------|------------|------------|-------------------|------------|------------|-------------------|--------------------------------|-------------------------|-------------------|------------|
|                     |                 |                    | Incomplete dates | In situ    | Other      | Eligible patients | DCO        | Other      |                   | MV                             | Non-specific morphology | Lost to follow-up | Censored   |
| Detroit             | 2000-2014       | 5,586              | 0.8              | 0.5        | 1.6        | 5,423             | 1.8        | 2.1        | 5,212             | 97.9                           | 2.7                     | 2.4               | 0.1        |
| Minnesota           | 2000-2013       | 6,405              | 0.0              | 1.0        | 1.9        | 6,215             | 2.6        | 3.0        | 5,863             | 99.9                           | 0.5                     | 0.0               | 0.0        |
| Mississippi         | 2002-2014       | 2,699              | 0.3              | 0.6        | 0.9        | 2,652             | 2.9        | 2.1        | 2,520             | 97.5                           | 4.0                     | 0.0               | 0.0        |
| Missouri            | -               | -                  | -                | -          | -          | -                 | -          | -          | -                 | -                              | -                       | -                 | -          |
| Montana             | 2000-2014       | 1,397              | 0.6              | 0.6        | 1.0        | 1,366             | 4.2        | 1.8        | 1,283             | 97.9                           | 3.0                     | 0.0               | 0.0        |
| Nebraska            | 2000-2014       | 2,201              | 0.4              | 0.6        | 1.8        | 2,138             | 1.4        | 3.6        | 2,031             | 96.4                           | 4.3                     | 0.0               | 0.0        |
| New Hampshire       | 2000-2014       | 1,833              | 0.2              | 0.5        | 1.7        | 1,788             | 2.7        | 2.1        | 1,702             | 96.8                           | 4.3                     | 0.0               | 0.0        |
| New Jersey          | 2000-2014       | 12,817             | 0.8              | 0.8        | 1.4        | 12,441            | 1.6        | 1.7        | 12,031            | 96.9                           | 4.1                     | 23.5              | 0.0        |
| New Mexico          | 2000-2014       | 2,376              | 0.0              | 0.9        | 1.5        | 2,319             | 3.8        | 1.9        | 2,186             | 96.4                           | 5.6                     | 3.7               | 0.1        |
| New York            | 2000-2014       | 28,006             | 1.8              | 0.8        | 1.5        | 26,859            | 1.2        | 1.7        | 26,078            | 97.3                           | 3.5                     | 0.0               | 0.0        |
| New York City       | 2000-2014       | 10,410             | 2.5              | 0.8        | 1.4        | 9,918             | 1.0        | 1.7        | 9,652             | 98.1                           | 2.7                     | 0.0               | 0.0        |
| North Carolina      | 2000-2014       | 11,181             | 0.0              | 0.7        | 1.0        | 10,988            | 2.2        | 2.5        | 10,470            | 97.6                           | 3.5                     | 0.0               | 0.0        |
| Ohio                | 2000-2014       | 15,028             | 0.1              | 0.6        | 1.5        | 14,705            | 3.5        | 2.7        | 13,796            | 97.0                           | 4.6                     | 0.0               | 0.0        |
| Oklahoma            | 2000-2010       | 3,330              | 0.6              | 0.3        | 1.7        | 3,244             | 2.7        | 1.8        | 3,100             | 96.4                           | 6.4                     | 0.0               | 0.0        |
| Oregon              | 2000-2013       | 5,005              | 0.2              | 0.7        | 1.8        | 4,872             | 2.1        | 2.1        | 4,666             | 94.5                           | 6.7                     | 0.0               | 0.0        |
| Pennsylvania        | 2000-2014       | 19,754             | 0.7              | 0.7        | 1.7        | 19,151            | 2.1        | 2.4        | 18,292            | 97.1                           | 3.7                     | 0.0               | 0.0        |
| Rhode Island        | 2000-2014       | 1,568              | 0.1              | 2.3        | 1.0        | 1,514             | 1.8        | 2.2        | 1,453             | 97.5                           | 3.4                     | 0.0               | 0.0        |
| South Carolina      | 2000-2014       | 5,350              | 0.0              | 0.6        | 1.3        | 5,247             | 2.8        | 2.8        | 4,953             | 94.8                           | 6.5                     | 0.0               | 0.0        |
| Tennessee           | 2000-2011       | 5,805              | 0.4              | 0.6        | 1.1        | 5,680             | 3.4        | 1.9        | 5,380             | 97.3                           | 3.5                     | 0.0               | 0.0        |
| Texas               | 2000-2013       | 22,811             | 0.9              | 0.6        | 1.0        | 22,251            | 2.9        | 2.1        | 21,145            | 95.8                           | 6.5                     | 0.0               | 0.0        |
| Utah                | 2000-2014       | 2,397              | 0.2              | 1.4        | 2.0        | 2,313             | 0.6        | 2.8        | 2,235             | 96.6                           | 4.3                     | 4.3               | 0.1        |
| Vermont             | 2000-2013       | 800                | 0.1              | 0.1        | 1.3        | 788               | 1.9        | 2.0        | 757               | 97.1                           | 3.7                     | 0.0               | 0.0        |
| Washington          | 2000-2008       | 5,330              | 0.6              | 0.6        | 2.5        | 5,134             | 1.0        | 2.6        | 4,950             | 96.4                           | 4.4                     | 0.0               | 0.0        |
| Seattle             | 2000-2014       | 6,355              | 0.4              | 0.9        | 1.6        | 6,171             | 0.6        | 2.4        | 5,986             | 97.0                           | 3.4                     | 1.3               | 0.0        |
| West Virginia       | 2000-2014       | 2,750              | 1.3              | 0.1        | 1.6        | 2,667             | 2.1        | 1.7        | 2,566             | 94.4                           | 7.0                     | 0.0               | 0.0        |
| Wisconsin           | 2000-2013       | 7,349              | 0.4              | 0.4        | 0.7        | 7,236             | 3.4        | 2.4        | 6,815             | 97.2                           | 3.6                     | 0.0               | 0.0        |
| Wyoming             | 2000-2013       | 609                | 0.2              | 0.2        | 2.0        | 595               | 1.0        | 2.5        | 574               | 97.7                           | 3.3                     | 0.0               | 0.2        |
| <b>ASIA</b>         |                 | <b>120,638</b>     | <b>0.5</b>       | <b>0.2</b> | <b>2.8</b> | <b>116,412</b>    | <b>4.2</b> | <b>1.3</b> | <b>109,998</b>    | <b>91.5</b>                    | <b>10.6</b>             | <b>0.6</b>        | <b>1.4</b> |
| Chinese registries  | 2003-2013       | 10,794             | 0.3              | 0.0        | 1.3        | 10,619            | 0.9        | 0.0        | 10,517            | 83.0                           | 22.8                    | 5.7               | 0.2        |
| Beijing             | 2003-2013       | 5,471              | 0.0              | 0.0        | 1.8        | 5,371             | 0.8        | 0.0        | 5,329             | 85.0                           | 15.3                    | 8.5               | 0.3        |
| Changle             | 2003-2013       | 134                | 6.0              | 0.0        | 4.5        | 120               | 0.0        | 0.8        | 119               | 89.1                           | 25.2                    | 5.9               | 0.0        |
| Cixian              | 2003-2013       | 112                | 0.0              | 0.0        | 0.9        | 111               | 0.9        | 0.0        | 110               | 90.9                           | 9.1                     | 0.0               | 0.0        |
| Dafeng              | 2003-2013       | 215                | 0.0              | 0.0        | 0.0        | 215               | 0.0        | 0.0        | 215               | 81.4                           | 39.1                    | 0.0               | 0.0        |
| Dalian              | 2003-2013       | 1,304              | 0.0              | 0.0        | 0.0        | 1,304             | 3.5        | 0.0        | 1,258             | 90.5                           | 13.1                    | 0.0               | 0.1        |
| Donghai             | 2003-2013       | 173                | 0.0              | 0.0        | 0.0        | 173               | 2.3        | 0.0        | 169               | 58.6                           | 42.0                    | 5.9               | 0.0        |
| Feicheng            | 2003-2013       | 250                | 0.0              | 0.0        | 0.4        | 249               | 0.0        | 0.0        | 249               | 68.3                           | 32.9                    | 8.4               | 0.0        |
| Ganyu               | 2003-2013       | 156                | 0.0              | 0.0        | 0.0        | 156               | 0.6        | 0.0        | 155               | 18.7                           | 84.5                    | 3.9               | 0.0        |
| Guanyun             | 2004-2013       | 204                | 0.0              | 0.0        | 0.0        | 204               | 0.0        | 0.0        | 204               | 86.3                           | 69.6                    | 6.9               | 0.0        |
| Haimen              | 2003-2013       | 559                | 0.0              | 0.0        | 1.6        | 550               | 0.4        | 0.0        | 548               | 80.3                           | 20.6                    | 1.5               | 0.0        |
| Haining             | 2003-2013       | 238                | 0.0              | 0.0        | 0.4        | 237               | 0.4        | 0.0        | 236               | 91.1                           | 47.5                    | 0.8               | 0.4        |
| Jianhu              | 2003-2013       | 113                | 0.0              | 0.0        | 0.0        | 113               | 0.0        | 0.0        | 113               | 87.6                           | 76.1                    | 12.4              | 0.0        |
| Jiashan             | 2003-2013       | 137                | 0.0              | 0.0        | 0.7        | 136               | 0.0        | 0.0        | 136               | 92.6                           | 7.4                     | 0.0               | 0.0        |
| Jintan              | 2003-2013       | 145                | 0.0              | 0.7        | 1.4        | 142               | 0.7        | 0.0        | 141               | 50.4                           | 49.6                    | 1.4               | 0.0        |
| Lianyungang         | 2008-2013       | 201                | 0.0              | 0.0        | 0.0        | 201               | 0.5        | 0.0        | 200               | 79.5                           | 36.0                    | 23.5              | 0.0        |
| Linzhou             | 2003-2013       | 208                | 0.0              | 0.0        | 0.0        | 208               | 0.0        | 0.0        | 208               | 67.8                           | 32.2                    | 0.0               | 0.0        |
| Qidong              | 2003-2013       | 321                | 0.0              | 0.0        | 0.0        | 321               | 0.0        | 0.0        | 321               | 84.1                           | 15.9                    | 1.2               | 0.0        |
| Sihui               | 2003-2013       | 109                | 4.6              | 0.0        | 0.0        | 104               | 0.0        | 1.0        | 103               | 83.5                           | 35.0                    | 3.9               | 0.0        |
| Taixing             | 2003-2013       | 160                | 11.3             | 0.0        | 0.6        | 141               | 0.7        | 0.0        | 140               | 77.9                           | 81.4                    | 4.3               | 0.0        |
| Yangzhong           | 2003-2013       | 61                 | 0.0              | 0.0        | 0.0        | 61                | 0.0        | 0.0        | 61                | 57.4                           | 96.7                    | 0.0               | 0.0        |
| Zhongshan           | 2003-2013       | 523                | 0.0              | 0.2        | 3.8        | 502               | 0.0        | 0.0        | 502               | 89.6                           | 15.9                    | 0.0               | 0.0        |
| Cyprus *            | 2004-2014       | 611                | 1.0              | 0.3        | 1.0        | 597               | 6.5        | 0.8        | 553               | 99.5                           | 1.4                     | 0.0               | 29.8       |
| Hong Kong *         | -               | -                  | -                | -          | -          | -                 | -          | -          | -                 | -                              | -                       | -                 | -          |
| Indian registries   | 2000-2014       | 173                | 0.0              | 0.0        | 0.0        | 173               | 0.0        | 0.6        | 172               | 84.9                           | 34.3                    | 1.2               | 0.0        |
| Guwahati            | -               | -                  | -                | -          | -          | -                 | -          | -          | -                 | -                              | -                       | -                 | -          |
| Karunagappally      | 2000-2014       | 173                | 0.0              | 0.0        | 0.0        | 173               | 0.0        | 0.6        | 172               | 84.9                           | 34.3                    | 1.2               | 0.0        |
| Iran (Golestan)     | -               | -                  | -                | -          | -          | -                 | -          | -          | -                 | -                              | -                       | -                 | -          |
| Israel *            | 2000-2013       | 7,104              | 0.0              | 0.1        | 13.9       | 6,108             | 6.3        | 1.0        | 5,663             | 96.6                           | 5.8                     | 0.0               | 0.0        |
| Japanese registries | 2000-2014       | 36,517             | 0.8              | 0.1        | 1.6        | 35,629            | 11.5       | 0.8        | 31,244            | 92.5                           | 12.3                    | 0.0               | 1.9        |
| Aichi               | 2003-2013       | 5,408              | 0.2              | 0.1        | 1.1        | 5,330             | 8.5        | 0.0        | 4,877             | 95.0                           | 7.6                     | 0.0               | 3.2        |
| Akita               | 2010-2014       | 502                | 2.0              | 0.2        | 0.6        | 488               | 0.0        | 2.5        | 476               | 90.8                           | 14.5                    | 0.0               | 38.4       |
| Ehime               | 2007-2013       | 999                | 0.3              | 0.0        | 2.2        | 974               | 13.7       | 0.0        | 841               | 91.6                           | 10.7                    | 0.0               | 0.0        |
| Fukui               | 2003-2009       | 403                | 0.5              | 0.0        | 1.0        | 397               | 1.0        | 0.0        | 393               | 88.8                           | 14.2                    | 0.0               | 2.8        |
| Gunma               | 2003-2012       | 1,394              | 15.5             | 0.0        | 0.3        | 1,174             | 19.1       | 2.5        | 921               | 92.0                           | 2.6                     | 0.0               | 2.2        |
| Hiroshima           | 2004-2008       | 1,010              | 0.2              | 0.1        | 4.2        | 965               | 6.6        | 0.0        | 901               | 99.4                           | 1.1                     | 0.0               | 0.4        |
| Hyogo               | 2007-2012       | 2,742              | 0.5              | 0.0        | 1.7        | 2,681             | 19.7       | 0.0        | 2,154             | 95.0                           | 7.9                     | 0.0               | 1.5        |
| Ibaraki             | 2006-2012       | 1,666              | 0.3              | 0.2        | 1.1        | 1,640             | 11.7       | 0.0        | 1,448             | 92.3                           | 15.2                    | 0.0               | 0.9        |
| Kanagawa            | 2000-2013       | 9,374              | 0.0              | 0.1        | 2.0        | 9,180             | 15.9       | 1.7        | 7,565             | 92.6                           | 21.5                    | 0.0               | 0.0        |
| Miyagi              | 2000-2010       | 1,906              | 0.8              | 0.0        | 0.8        | 1,874             | 8.6        | 2.1        | 1,673             | 89.8                           | 10.9                    | 0.0               | 1.6        |
| Niigata             | 2000-2013       | 2,907              | 0.2              | 0.0        | 2.1        | 2,840             | 9.6        | 1.9        | 2,512             | 91.4                           | 1.2                     | 0.0               | 0.0        |
| Osaka               | 2000-2008       | 4,972              | 0.0              | 0.0        | 1.2        | 4,912             | 8.1        | 0.0        | 4,513             | 90.0                           | 14.3                    | 0.0               | 2.7        |
| Saga                | 2006-2013       | 471                | 0.2              | 0.0        | 2.1        | 460               | 7.4        | 0.0        | 426               | 91.1                           | 10.8                    | 0.0               | 0.0        |
| Tochigi             | 2006-2013       | 1,331              | 0.2              | 0.1        | 1.1        | 1,313             | 6.8        | 0.0        | 1,224             | 94.3                           | 7.8                     | 0.0               | 1.3        |
| Yamagata            | 2003-2013       | 1,126              | 0.5              | 0.1        | 1.3        | 1,104             | 4.5        | 0.0        | 1,054             | 88.0                           | 15.6                    | 0.0               | 0.9        |
| Yamanashi           | 2008-2012       | 306                | 1.0              | 0.3        | 1.6        | 297               | 10.4       | 0.0        | 266               | 91.7                           | 10.2                    | 0.0               | 0.0        |
| Jordan *            | 2000-2014       | -                  | -                | -          | -          | -                 | -          | -          | -                 | -                              | -                       | -                 | -          |
| Korea * ‡           | 2000-2014       | 28,532             | 0.7              | 0.0        | 0.0        | 28,330            | 0.0        | 0.9        | 28,076            | 91.6                           | 10.1                    | 0.0               | 0.0        |
| Kuwait *            | 2000-2013       | 279                | 0.0              | 0.0        | 17.6       | 230               | 2.6        | 1.3        | 221               | 99.5                           | 0.9                     | 0.5               | 0.0        |
| Malaysia (Penang)   | 2000-2013       | 849                | 0.5              | 0.0        | 1.5        | 832               | 1.0        | 2.3        | 805               | 93.5                           | 10.2                    | 0.0               | 20.5       |
| Mongolia *          | -               | -                  | -                | -          | -          | -                 | -          | -          | -                 | -                              | -                       | -                 | -          |
| Qatar *             | 2000-2014       | 245                | 0.0              | 0.4        | 8.6        | 223               | 1.3        | 2.7        | 214               | 97.2                           | 5.6                     | 0.0               | 52.8       |
| Singapore *         | 2000-2014       | 4,618              | 0.0              | 0.4        | 21.5       | 3,605             | 1.1        | 1.4        | 3,514             | 95.0                           | 1.1                     | 0.0               | 0.0        |
| Taiwan *            | 2000-2014       | 17,528             | 0.1              | 1.1        | 1.8        | 17,023            | 0.0        | 0.9        | 16,872            | 94.9                           | 0.6                     | 0.0               | 0.0        |

Web-table 2.11: Data quality indicators, women diagnosed during 2000-2014, by continent, country and registry: OVARY

|                                | Calendar period | Patients submitted | Ineligible (%) ¶ |            |             | Excluded (%) ¶¶   |            |            | Patients included | Data quality indicators (%) †† |                         |                   |            |
|--------------------------------|-----------------|--------------------|------------------|------------|-------------|-------------------|------------|------------|-------------------|--------------------------------|-------------------------|-------------------|------------|
|                                |                 |                    | Incomplete dates | In situ    | Other       | Eligible patients | DCO        | Other      |                   | MV                             | Non-specific morphology | Lost to follow-up | Censored   |
| Thai registries                | 2000-2014       | 6,393              | 0.0              | 0.0        | 2.2         | 6,255             | 2.9        | 9.7        | 5,469             | 77.0                           | 23.8                    | 0.0               | 3.4        |
| Bangkok                        | 2000-2012       | 3,387              | 0.0              | 0.0        | 2.5         | 3,302             | 4.3        | 17.1       | 2,596             | 75.8                           | 24.4                    | 0.0               | 0.0        |
| Khon Kaen                      | 2000-2014       | 945                | 0.0              | 0.0        | 2.6         | 920               | 0.8        | 3.4        | 882               | 79.9                           | 22.2                    | 0.0               | 5.9        |
| Lampang                        | 2000-2014       | 464                | 0.0              | 0.0        | 0.0         | 464               | 0.6        | 0.4        | 459               | 81.0                           | 19.2                    | 0.0               | 0.0        |
| Lamphun                        | 2000-2014       | 310                | 0.0              | 0.0        | 0.0         | 310               | 0.6        | 2.3        | 301               | 61.8                           | 38.5                    | 0.0               | 0.0        |
| Lopburi                        | 2000-2014       | 555                | 0.0              | 0.0        | 1.3         | 548               | 2.7        | 0.0        | 533               | 64.7                           | 35.3                    | 0.0               | 22.7       |
| Songkhla                       | 2000-2014       | 732                | 0.0              | 0.0        | 2.9         | 711               | 1.7        | 0.1        | 698               | 91.3                           | 11.9                    | 0.1               | 1.9        |
| Turkish registries             | 2000-2013       | 6,995              | 1.2              | 0.2        | 1.6         | 6,788             | 0.8        | 0.8        | 6,678             | 95.5                           | 9.2                     | 0.1               | 4.0        |
| Ankara                         | 2008-2012       | 2,452              | 0.0              | 0.1        | 1.8         | 2,406             | 0.0        | 0.5        | 2,393             | 99.3                           | 4.5                     | 0.0               | 1.0        |
| Antalya                        | 2006-2012       | 540                | 0.0              | 0.2        | 1.3         | 532               | 0.6        | 2.1        | 518               | 96.7                           | 6.8                     | 0.0               | 1.7        |
| Bursa                          | 2006-2012       | 682                | 2.5              | 0.0        | 0.9         | 659               | 2.6        | 0.5        | 639               | 93.0                           | 16.6                    | 0.0               | 0.0        |
| Edirne                         | 2006-2012       | 125                | 3.2              | 0.0        | 4.0         | 116               | 1.7        | 0.0        | 114               | 89.5                           | 12.3                    | 0.0               | 0.0        |
| Erzurum                        | 2006-2012       | 134                | 1.5              | 0.0        | 2.2         | 129               | 0.8        | 1.6        | 126               | 91.3                           | 20.6                    | 0.0               | 1.6        |
| Eskisehir                      | 2006-2012       | 246                | 0.0              | 0.0        | 1.2         | 243               | 0.0        | 0.0        | 243               | 93.8                           | 0.0                     | 0.0               | 0.8        |
| Izmir                          | 2000-2013       | 2,253              | 2.6              | 0.3        | 1.5         | 2,155             | 1.0        | 1.0        | 2,112             | 93.7                           | 11.5                    | 0.1               | 10.8       |
| Samsun                         | 2006-2012       | 340                | 0.0              | 0.3        | 2.1         | 332               | 2.1        | 1.5        | 320               | 92.8                           | 9.7                     | 1.9               | 0.0        |
| Trabzon                        | 2006-2012       | 223                | 1.3              | 0.4        | 1.3         | 216               | 0.9        | 0.5        | 213               | 88.3                           | 25.4                    | 0.0               | 1.4        |
| <b>EUROPE</b>                  |                 | <b>468,032</b>     | <b>0.2</b>       | <b>0.2</b> | <b>10.2</b> | <b>418,455</b>    | <b>3.3</b> | <b>1.2</b> | <b>399,675</b>    | <b>93.2</b>                    | <b>4.5</b>              | <b>0.7</b>        | <b>1.4</b> |
| Austria *                      | 2000-2014       | 13,016             | 0.0              | 1.2        | 0.9         | 12,742            | 7.4        | 1.8        | 11,567            | 96.9                           | 8.3                     | 0.0               | 0.0        |
| Belarus (Childhood) †          | -               | -                  | -                | -          | -           | -                 | -          | -          | -                 | -                              | -                       | -                 | -          |
| Belgium *                      | 2004-2014       | 10,711             | 0.0              | 1.5        | 0.4         | 10,505            | 0.0        | 0.5        | 10,447            | 97.8                           | 3.0                     | 1.1               | 0.0        |
| Bulgaria *                     | 2000-2014       | 13,100             | 0.1              | 0.0        | 1.4         | 12,910            | 5.2        | 0.2        | 12,206            | 90.2                           | 1.2                     | 0.1               | 0.0        |
| Croatia *                      | 2000-2014       | 7,614              | 0.0              | 0.3        | 1.3         | 7,494             | 4.5        | 0.3        | 7,138             | 78.6                           | 0.3                     | 0.0               | 0.0        |
| Czech Republic *               | 2000-2014       | 21,473             | 0.0              | 0.1        | 9.6         | 19,386            | 1.7        | 0.9        | 18,875            | 88.6                           | 2.6                     | 0.0               | 0.0        |
| Denmark *                      | 2000-2014       | 9,099              | 0.0              | 0.0        | 0.8         | 9,024             | 0.0        | 0.0        | 9,024             | 98.1                           | 4.4                     | 0.2               | 0.0        |
| Estonia *                      | 2000-2012       | 2,233              | 0.0              | 0.1        | 0.8         | 2,213             | 3.8        | 0.4        | 2,122             | 89.9                           | 4.4                     | 0.3               | 0.0        |
| Finland *                      | 2000-2014       | 8,571              | 0.4              | 0.0        | 1.2         | 8,436             | 3.4        | 0.5        | 8,101             | 95.1                           | 3.9                     | 0.2               | 0.0        |
| French registries              | 2000-2010       | 8,782              | 0.5              | 0.0        | 0.1         | 8,728             | 0.0        | 0.8        | 8,658             | 95.5                           | 0.8                     | 1.8               | 0.0        |
| Bas-Rhin                       | 2000-2010       | 952                | 0.0              | 0.0        | 0.0         | 952               | 0.0        | 0.7        | 945               | 95.6                           | 0.2                     | 1.4               | 0.0        |
| Basse Normandie                | -               | -                  | -                | -          | -           | -                 | -          | -          | -                 | -                              | -                       | -                 | -          |
| Burgundy Digestive             | -               | -                  | -                | -          | -           | -                 | -          | -          | -                 | -                              | -                       | -                 | -          |
| Calvados                       | 2000-2010       | 653                | 0.0              | 0.0        | 0.2         | 652               | 0.0        | 0.3        | 650               | 93.8                           | 1.7                     | 0.5               | 0.0        |
| Calvados Digestive             | -               | -                  | -                | -          | -           | -                 | -          | -          | -                 | -                              | -                       | -                 | -          |
| Côte-d'Or Gynaecologic         | 2000-2010       | 367                | 10.4             | 0.0        | 0.0         | 329               | 0.0        | 3.3        | 318               | 98.7                           | 0.3                     | 4.1               | 0.0        |
| Côte-d'Or Haematopoietic       | -               | -                  | -                | -          | -           | -                 | -          | -          | -                 | -                              | -                       | -                 | -          |
| Doubs                          | 2000-2010       | 491                | 0.0              | 0.0        | 0.0         | 491               | 0.0        | 0.2        | 490               | 97.6                           | 0.6                     | 0.8               | 0.0        |
| Finistère                      | -               | -                  | -                | -          | -           | -                 | -          | -          | -                 | -                              | -                       | -                 | -          |
| Gironde CNS                    | -               | -                  | -                | -          | -           | -                 | -          | -          | -                 | -                              | -                       | -                 | -          |
| Gironde General                | 2005-2010       | 428                | 1.6              | 0.0        | 0.0         | 421               | 0.0        | 0.2        | 420               | 95.7                           | 0.2                     | 4.3               | 0.0        |
| Gironde Haematopoietic         | -               | -                  | -                | -          | -           | -                 | -          | -          | -                 | -                              | -                       | -                 | -          |
| Haut-Rhin                      | 2000-2010       | 663                | 0.3              | 0.0        | 0.0         | 661               | 0.0        | 1.5        | 651               | 95.9                           | 0.6                     | 1.7               | 0.0        |
| Haute-Vienne                   | 2009-2009       | 30                 | 0.0              | 0.0        | 3.3         | 29                | 0.0        | 0.0        | 29                | 100.0                          | 0.0                     | 0.0               | 0.0        |
| Hérault                        | 2000-2010       | 885                | 0.0              | 0.0        | 0.0         | 885               | 0.0        | 0.6        | 880               | 93.3                           | 0.0                     | 2.4               | 0.0        |
| Isère                          | 2000-2010       | 1,013              | 0.0              | 0.0        | 0.0         | 1,013             | 0.0        | 0.9        | 1,004             | 96.2                           | 0.8                     | 0.6               | 0.0        |
| Lille Metro                    | 2008-2010       | 200                | 0.0              | 0.0        | 0.5         | 199               | 0.0        | 0.0        | 199               | 91.5                           | 1.0                     | 2.0               | 0.0        |
| Loire-Atlantique               | 2000-2010       | 1,548              | 0.1              | 0.0        | 0.2         | 1,544             | 0.0        | 1.2        | 1,525             | 96.9                           | 1.1                     | 2.5               | 0.0        |
| Manche                         | 2000-2010       | 620                | 0.0              | 0.0        | 0.0         | 620               | 0.0        | 0.2        | 619               | 95.3                           | 0.8                     | 1.5               | 0.0        |
| Somme                          | 2000-2010       | 577                | 0.0              | 0.0        | 0.0         | 577               | 0.0        | 0.7        | 573               | 93.5                           | 2.6                     | 2.8               | 0.0        |
| Tarn                           | 2000-2010       | 355                | 0.0              | 0.0        | 0.0         | 355               | 0.0        | 0.0        | 355               | 94.9                           | 1.1                     | 0.6               | 0.0        |
| France Childhood Haem †        | -               | -                  | -                | -          | -           | -                 | -          | -          | -                 | -                              | -                       | -                 | -          |
| France Childhood Solid †       | -               | -                  | -                | -          | -           | -                 | -          | -          | -                 | -                              | -                       | -                 | -          |
| German registries              | 2000-2014       | 49,781             | 0.8              | 0.5        | 9.6         | 44,308            | 13.4       | 0.7        | 38,064            | 96.2                           | 1.4                     | 0.3               | 13.1       |
| Brandenburg                    | 2000-2014       | 4,715              | 0.0              | 0.1        | 14.3        | 4,037             | 12.6       | 0.5        | 3,510             | 95.2                           | 1.0                     | 0.0               | 15.8       |
| Bremen                         | 2000-2013       | 1,339              | 0.0              | 0.1        | 12.4        | 1,172             | 6.1        | 0.1        | 1,100             | 94.3                           | 0.5                     | 2.5               | 0.0        |
| Hamburg                        | 2000-2013       | 2,989              | 0.0              | 0.0        | 0.0         | 2,989             | 10.8       | 0.1        | 2,663             | 98.4                           | 1.8                     | 3.0               | 0.0        |
| Lower Saxony                   | 2003-2013       | 10,418             | 4.0              | 0.0        | 0.9         | 9,907             | 13.3       | 0.8        | 8,503             | 99.5                           | 0.8                     | 0.0               | 19.5       |
| Mecklenburg-W. Pomerania       | 2000-2014       | 3,157              | 0.0              | 0.1        | 18.2        | 2,581             | 12.1       | 0.5        | 2,257             | 94.3                           | 0.8                     | 0.0               | 15.3       |
| Rhineland Palatinate           | 2000-2013       | 6,906              | 0.0              | 0.1        | 13.0        | 6,001             | 17.6       | 0.3        | 4,924             | 93.1                           | 0.2                     | 0.0               | 19.7       |
| Saarland                       | 2000-2012       | 1,897              | 0.0              | 11.6       | 3.4         | 1,613             | 6.8        | 0.6        | 1,494             | 97.0                           | 4.4                     | 0.0               | 0.0        |
| Saxony                         | 2000-2014       | 8,672              | 0.0              | 0.2        | 14.2        | 7,422             | 9.6        | 1.2        | 6,621             | 93.7                           | 2.6                     | 0.0               | 14.6       |
| Schleswig-Holstein             | 2000-2012       | 5,631              | 0.0              | 0.2        | 12.6        | 4,911             | 21.0       | 1.0        | 3,829             | 98.2                           | 2.1                     | 0.0               | 0.0        |
| Thuringia                      | 2000-2014       | 4,057              | 0.0              | 0.2        | 9.2         | 3,675             | 13.3       | 0.6        | 3,163             | 96.0                           | 0.9                     | 0.0               | 15.6       |
| Gibraltar *                    | 2000-2008       | 16                 | 6.3              | 6.3        | 0.0         | 14                | 0.0        | 0.0        | 14                | 100.0                          | 0.0                     | 0.0               | 50.0       |
| Greece (National Paediatric) † | -               | -                  | -                | -          | -           | -                 | -          | -          | -                 | -                              | -                       | -                 | -          |
| Iceland *                      | 2000-2014       | 296                | 0.0              | 0.0        | 5.4         | 280               | 1.1        | 0.4        | 276               | 96.0                           | 4.0                     | 0.0               | 0.0        |
| Ireland *                      | 2000-2013       | 6,064              | 0.0              | 0.3        | 15.5        | 5,105             | 2.1        | 0.9        | 4,952             | 90.1                           | 1.6                     | 0.0               | 0.0        |
| Italian registries             | 2000-2014       | 32,632             | 0.0              | 0.2        | 3.5         | 31,431            | 0.8        | 0.5        | 31,025            | 85.3                           | 17.9                    | 0.9               | 0.8        |
| Alto Adige                     | 2000-2010       | 479                | 0.0              | 0.0        | 0.6         | 476               | 1.9        | 0.6        | 464               | 93.3                           | 7.3                     | 0.0               | 0.0        |
| Barletta-Andria-Trani          | 2006-2012       | 227                | 0.0              | 0.0        | 0.9         | 225               | 1.8        | 0.0        | 221               | 87.8                           | 17.2                    | 1.8               | 0.0        |
| Basilicata                     | 2006-2010       | 268                | 0.0              | 0.0        | 0.0         | 268               | 0.0        | 0.4        | 267               | 75.7                           | 30.7                    | 0.7               | 0.4        |
| Bergamo                        | 2007-2012       | 612                | 0.0              | 0.0        | 0.5         | 609               | 0.0        | 0.5        | 606               | 89.3                           | 15.3                    | 1.2               | 0.0        |
| Biella-Vercelli                | 2000-2010       | 423                | 0.0              | 0.5        | 13.9        | 362               | 1.7        | 1.7        | 350               | 92.3                           | 9.1                     | 0.9               | 0.6        |
| Brescia                        | 2000-2008       | 1,014              | 0.0              | 0.0        | 0.2         | 1,012             | 0.0        | 0.4        | 1,008             | 79.9                           | 23.6                    | 0.9               | 0.1        |
| Brindisi                       | 2006-2008       | 105                | 0.0              | 0.0        | 0.0         | 105               | 0.0        | 1.9        | 103               | 75.7                           | 25.2                    | 0.0               | 3.9        |
| Caserta                        | 2008-2010       | 208                | 0.0              | 0.0        | 0.5         | 207               | 0.0        | 0.5        | 206               | 90.3                           | 9.7                     | 0.0               | 5.3        |
| Catania-Messina-Enna           | 2003-2012       | 1,625              | 0.0              | 0.0        | 0.2         | 1,621             | 1.8        | 0.6        | 1,583             | 85.3                           | 23.7                    | 0.0               | 2.0        |
| Catanzaro                      | 2003-2009       | 158                | 0.0              | 0.0        | 0.0         | 158               | 0.0        | 0.6        | 157               | 81.5                           | 21.7                    | 0.0               | 0.0        |
| Como                           | 2003-2011       | 484                | 0.0              | 0.0        | 0.2         | 483               | 0.2        | 0.6        | 479               | 94.6                           | 6.5                     | 0.6               | 0.0        |
| Cremona                        | 2005-2010       | 222                | 0.0              | 0.0        | 0.0         | 222               | 0.5        | 0.0        | 221               | 83.3                           | 19.0                    | 1.4               | 0.0        |
| Ferrara                        | 2000-2011       | 530                | 0.0              | 0.0        | 0.4         | 528               | 0.2        | 0.0        | 527               | 81.6                           | 19.0                    | 1.5               | 0.0        |
| Friuli-Venezia-Giulia          | 2000-2010       | 1,480              | 0.0              | 0.0        | 0.2         | 1,477             | 2.8        | 0.1        | 1,434             | 86.5                           | 13.9                    | 0.6               | 0.0        |
| Genoa                          | 2000-2009       | 1,363              | 0.0              | 0.3        | 10.6        | 1,215             | 0.2        | 0.0        | 1,212             | 86.1                           | 15.8                    | 0.2               | 0.0        |
| Latina                         | 2000-2011       | 492                | 0.0              | 0.0        | 0.8         | 488               | 0.0        | 0.6        | 485               | 79.6                           | 22.1                    | 2.7               | 1.9        |
| Lecce                          | 2003-2008       | 490                | 0.0              | 0.0        | 0.8         | 486               | 0.2        | 0.4        | 483               | 79.3                           | 25.7                    | 0.4               | 2.1        |

Web-table 2.11: Data quality indicators, women diagnosed during 2000-2014, by continent, country and registry: OVARY

|                      | Calendar period | Patients submitted | Ineligible (%) ¶ |         |       | Excluded (%) ¶¶   |      |       | Patients included | Data quality indicators (%) †† |                         |                   |          |
|----------------------|-----------------|--------------------|------------------|---------|-------|-------------------|------|-------|-------------------|--------------------------------|-------------------------|-------------------|----------|
|                      |                 |                    | Incomplete dates | In situ | Other | Eligible patients | DCO  | Other |                   | MV                             | Non-specific morphology | Lost to follow-up | Censored |
| Mantova              | 2000-2010       | 522                | 0.0              | 0.0     | 2.7   | 508               | 2.0  | 0.6   | 495               | 85.5                           | 18.4                    | 0.2               | 0.2      |
| Milano               | 2000-2012       | 2,634              | 0.0              | 0.0     | 1.8   | 2,586             | 0.2  | 0.2   | 2,574             | 86.8                           | 15.2                    | 2.8               | 0.2      |
| Modena               | 2000-2012       | 1,132              | 0.0              | 2.6     | 14.7  | 937               | 0.0  | 0.5   | 932               | 86.9                           | 15.0                    | 0.0               | 0.9      |
| Monza-Brianza        | 2007-2012       | 474                | 0.0              | 0.0     | 0.0   | 474               | 0.0  | 1.7   | 466               | 90.6                           | 11.2                    | 0.9               | 0.0      |
| Naples               | 2000-2012       | 682                | 0.0              | 0.0     | 0.3   | 680               | 0.0  | 0.6   | 676               | 86.1                           | 15.4                    | 2.4               | 1.9      |
| Nuoro                | 2003-2012       | 182                | 0.0              | 0.0     | 0.0   | 182               | 3.3  | 0.0   | 176               | 81.8                           | 23.3                    | 0.0               | 0.0      |
| Palermo              | 2003-2012       | 1,030              | 0.0              | 0.0     | 0.8   | 1,022             | 3.3  | 1.0   | 978               | 79.9                           | 24.4                    | 0.3               | 0.0      |
| Parma                | 2000-2014       | 827                | 0.0              | 0.8     | 5.8   | 772               | 0.9  | 0.3   | 763               | 86.5                           | 19.7                    | 0.9               | 0.1      |
| Pavia                | 2003-2009       | 431                | 0.0              | 0.0     | 10.9  | 384               | 0.0  | 0.3   | 383               | 79.1                           | 22.2                    | 0.0               | 0.5      |
| Piacenza             | 2006-2011       | 160                | 0.0              | 0.0     | 0.0   | 160               | 0.0  | 0.6   | 159               | 76.7                           | 26.4                    | 0.6               | 2.5      |
| Ragusa               | 2000-2012       | 585                | 0.0              | 0.2     | 13.0  | 508               | 1.6  | 1.4   | 493               | 79.7                           | 29.6                    | 0.4               | 0.0      |
| Reggio Emilia        | 2000-2012       | 642                | 0.0              | 0.0     | 0.6   | 638               | 0.0  | 1.3   | 630               | 84.0                           | 26.8                    | 1.1               | 0.0      |
| Romagna              | 2000-2012       | 1,603              | 0.0              | 0.5     | 0.4   | 1,589             | 0.1  | 0.1   | 1,587             | 82.7                           | 18.4                    | 0.3               | 0.0      |
| Salerno              | 2000-2009       | 906                | 0.0              | 0.0     | 0.3   | 903               | 0.0  | 0.2   | 901               | 78.6                           | 23.2                    | 1.4               | 3.1      |
| Sassari              | 2000-2011       | 430                | 0.0              | 0.0     | 0.0   | 430               | 3.5  | 0.0   | 415               | 85.5                           | 26.0                    | 0.0               | 0.0      |
| Siracusa             | 2000-2012       | 429                | 0.0              | 0.0     | 0.5   | 427               | 1.4  | 0.7   | 418               | 86.6                           | 17.7                    | 0.0               | 0.7      |
| Sondrio              | 2000-2011       | 222                | 0.0              | 0.0     | 0.0   | 222               | 0.0  | 0.0   | 222               | 86.0                           | 16.2                    | 0.5               | 0.0      |
| Taranto              | 2006-2012       | 397                | 0.0              | 0.0     | 0.5   | 395               | 1.3  | 0.8   | 387               | 87.1                           | 17.3                    | 1.8               | 0.0      |
| Trapani              | 2002-2010       | 339                | 0.0              | 0.0     | 0.0   | 339               | 0.9  | 2.1   | 329               | 83.0                           | 27.7                    | 0.0               | 1.5      |
| Trento               | 2000-2010       | 540                | 0.0              | 0.0     | 0.6   | 537               | 0.4  | 0.6   | 532               | 84.4                           | 19.4                    | 0.6               | 0.0      |
| Turin                | 2000-2012       | 1,420              | 0.0              | 0.0     | 1.1   | 1,405             | 1.8  | 1.1   | 1,365             | 88.0                           | 15.7                    | 1.4               | 0.0      |
| Tuscany              | 2000-2009       | 1,581              | 0.0              | 0.1     | 15.0  | 1,342             | 0.9  | 0.6   | 1,322             | 85.6                           | 18.0                    | 0.0               | 3.4      |
| Umbria               | 2000-2013       | 1,370              | 0.0              | 0.0     | 0.4   | 1,364             | 0.2  | 0.1   | 1,360             | 87.0                           | 14.7                    | 0.3               | 0.5      |
| Varese               | 2000-2012       | 1,338              | 0.0              | 0.0     | 16.4  | 1,118             | 0.2  | 0.3   | 1,113             | 87.7                           | 12.5                    | 1.4               | 0.1      |
| Veneto               | 2000-2009       | 2,420              | 0.0              | 0.0     | 0.3   | 2,412             | 0.4  | 0.3   | 2,395             | 87.3                           | 14.2                    | 1.0               | 1.3      |
| Viterbo              | 2006-2010       | 156                | 0.0              | 0.0     | 0.6   | 155               | 3.9  | 0.6   | 148               | 79.1                           | 21.6                    | 0.7               | 20.3     |
| Piedmont Childhood   | -               | -                  | -                | -       | -     | -                 | -    | -     | -                 | -                              | -                       | -                 | -        |
| Latvia *             | 2000-2014       | 4,818              | 0.0              | 0.0     | 19.5  | 3,877             | 0.0  | 0.9   | 3,842             | 100.0                          | 0.6                     | 0.0               | 0.0      |
| Lithuania *          | 2000-2012       | 6,187              | 0.0              | 0.0     | 7.5   | 5,726             | 4.6  | 0.2   | 5,452             | 86.8                           | 0.9                     | 0.0               | 0.3      |
| Malta *              | 2000-2013       | 576                | 0.0              | 0.0     | 2.8   | 560               | 1.4  | 0.9   | 547               | 94.0                           | 7.3                     | 0.0               | 0.0      |
| Netherlands *        | 2000-2014       | 25,659             | 0.0              | 0.1     | 21.7  | 20,064            | 0.2  | 3.8   | 19,252            | 97.0                           | 3.2                     | 0.4               | 0.0      |
| Norway *             | 2000-2014       | 11,202             | 0.0              | 0.1     | 34.1  | 7,369             | 0.3  | 1.9   | 7,207             | 99.9                           | 0.6                     | 0.2               | 0.0      |
| Poland *             | 2000-2014       | 56,134             | 0.0              | 0.0     | 2.1   | 54,939            | 2.2  | 0.5   | 53,462            | 92.7                           | 1.9                     | 0.0               | 0.0      |
| Greater Poland       | 2000-2014       | 5,125              | 0.0              | 0.0     | 2.8   | 4,980             | 3.9  | 0.4   | 4,766             | 96.6                           | 5.2                     | 0.0               | 0.0      |
| Holy Cross           | 2000-2014       | 1,838              | 0.0              | 0.0     | 4.3   | 1,759             | 1.9  | 0.8   | 1,711             | 94.9                           | 2.1                     | 0.0               | 0.0      |
| Kujavia-Pomerania    | 2000-2014       | 3,391              | 0.0              | 0.0     | 3.4   | 3,277             | 0.7  | 0.5   | 3,236             | 97.8                           | 4.0                     | 0.0               | 0.0      |
| Lesser Poland        | 2000-2014       | 5,138              | 0.0              | 0.0     | 1.1   | 5,082             | 2.8  | 0.4   | 4,924             | 93.4                           | 5.2                     | 0.0               | 0.0      |
| Łódź                 | 2000-2014       | 4,190              | 0.0              | 0.0     | 1.0   | 4,149             | 0.5  | 1.3   | 4,074             | 89.4                           | 0.7                     | 0.0               | 0.0      |
| Lower Silesia        | 2000-2014       | 4,315              | 0.0              | 0.0     | 0.0   | 4,315             | 0.6  | 0.3   | 4,277             | 84.5                           | 1.8                     | 0.2               | 0.0      |
| Lublin               | 2000-2014       | 3,426              | 0.0              | 0.0     | 2.7   | 3,334             | 5.5  | 0.2   | 3,144             | 94.3                           | 0.3                     | 0.0               | 0.0      |
| Lubush               | 2000-2014       | 1,276              | 0.0              | 0.0     | 0.6   | 1,268             | 1.8  | 0.5   | 1,239             | 96.3                           | 0.6                     | 0.0               | 0.1      |
| Mazovia              | 2000-2014       | 6,193              | 0.0              | 0.0     | 0.5   | 6,164             | 0.0  | 0.2   | 6,150             | 90.9                           | 0.5                     | 0.0               | 0.0      |
| Opole                | 2000-2014       | 1,548              | 0.0              | 0.0     | 5.0   | 1,471             | 0.0  | 0.5   | 1,464             | 97.7                           | 0.8                     | 0.0               | 0.0      |
| Podlaha              | 2000-2014       | 1,703              | 0.0              | 0.0     | 0.1   | 1,702             | 4.7  | 0.4   | 1,616             | 88.9                           | 0.8                     | 0.0               | 0.0      |
| Pomerania            | 2000-2014       | 3,569              | 0.0              | 0.0     | 4.5   | 3,408             | 7.0  | 0.6   | 3,148             | 96.5                           | 0.0                     | 0.0               | 0.0      |
| Silesia              | 2000-2014       | 7,431              | 0.0              | 0.0     | 4.7   | 7,082             | 0.8  | 0.4   | 6,995             | 93.2                           | 1.0                     | 0.0               | 0.0      |
| Subcarpathia         | 2000-2014       | 3,007              | 0.0              | 0.0     | 1.0   | 2,977             | 2.7  | 0.9   | 2,869             | 97.1                           | 0.5                     | 0.0               | 0.0      |
| Varmia-Mazuria       | 2000-2014       | 1,877              | 0.0              | 0.0     | 0.3   | 1,872             | 0.3  | 0.3   | 1,862             | 96.8                           | 4.8                     | 0.0               | 0.1      |
| West Pomerania       | 2000-2014       | 2,107              | 0.0              | 0.0     | 0.4   | 2,099             | 4.8  | 0.5   | 1,987             | 77.4                           | 0.2                     | 0.0               | 0.0      |
| Portugal *           | 2000-2014       | 7,452              | 0.4              | 0.2     | 11.0  | 6,583             | 0.2  | 0.6   | 6,532             | 94.5                           | 5.3                     | 2.1               | 0.0      |
| Azores               | 2000-2014       | 219                | 0.0              | 0.0     | 0.9   | 217               | 4.6  | 0.5   | 206               | 87.9                           | 12.6                    | 1.5               | 1.0      |
| Portugal Central     | 2003-2010       | 692                | 0.1              | 0.0     | 0.4   | 688               | 0.0  | 0.0   | 688               | 93.2                           | 8.3                     | 0.6               | 0.0      |
| Portugal North       | 2000-2010       | 1,496              | 1.8              | 0.0     | 1.9   | 1,440             | 0.0  | 0.5   | 1,433             | 95.6                           | 6.7                     | 0.0               | 0.0      |
| Portugal South       | 2000-2014       | 5,045              | 0.0              | 0.3     | 15.6  | 4,238             | 0.0  | 0.8   | 4,205             | 94.7                           | 4.0                     | 3.1               | 0.0      |
| Romania (Cluj)       | 2006-2012       | 630                | 0.0              | 0.3     | 14.0  | 540               | 14.8 | 0.0   | 460               | 87.4                           | 15.0                    | 0.0               | 0.0      |
| Russian registries ‡ | 2000-2014       | 11,147             | 0.0              | 0.0     | 2.6   | 10,859            | 0.5  | 1.7   | 10,628            | 88.8                           | 4.5                     | 2.2               | 1.8      |
| Arkhangelsk          | 2000-2014       | 1,814              | 0.0              | 0.2     | 0.3   | 1,806             | 0.6  | 2.0   | 1,759             | 91.6                           | 7.9                     | 1.0               | 0.0      |
| Karelia              | 2000-2014       | 1,046              | 0.0              | 0.0     | 3.1   | 1,014             | 1.1  | 0.3   | 1,000             | 88.1                           | 5.7                     | 1.0               | 2.2      |
| Omsk                 | 2000-2014       | 2,039              | 0.0              | 0.0     | 1.1   | 2,017             | 0.0  | 1.3   | 1,991             | 99.2                           | 3.3                     | 4.6               | 7.9      |
| Samara               | 2000-2014       | 5,279              | 0.0              | 0.0     | 4.2   | 5,058             | 0.5  | 1.4   | 4,959             | 83.6                           | 4.3                     | 2.0               | 0.0      |
| Tomsk                | 2005-2014       | 969                | 0.0              | 0.0     | 0.5   | 964               | 0.0  | 4.7   | 919               | 89.3                           | 0.2                     | 2.3               | 1.0      |
| Slovakia *           | 2000-2010       | 6,405              | 0.0              | 0.1     | 11.5  | 5,666             | 8.1  | 0.0   | 5,207             | 92.0                           | 8.8                     | 0.0               | 0.0      |
| Slovenia *           | 2000-2013       | 3,525              | 0.0              | 0.0     | 21.0  | 2,785             | 1.3  | 0.0   | 2,750             | 95.9                           | 0.4                     | 0.0               | 0.0      |
| Spanish registries   | 2000-2013       | 8,613              | 0.2              | 0.3     | 7.2   | 7,947             | 2.5  | 0.5   | 7,710             | 91.1                           | 2.8                     | 0.4               | 0.0      |
| Basque Country       | 2000-2013       | 2,564              | 0.0              | 0.4     | 1.0   | 2,529             | 1.9  | 0.9   | 2,457             | 91.2                           | 0.7                     | 0.3               | 0.0      |
| Canaries             | 2000-2011       | 1,453              | 0.0              | 0.3     | 21.7  | 1,133             | 1.9  | 0.4   | 1,107             | 90.5                           | 2.2                     | 0.3               | 0.0      |
| Girona               | 2000-2013       | 859                | 0.9              | 0.7     | 20.1  | 672               | 4.5  | 0.1   | 641               | 91.7                           | 10.3                    | 1.1               | 0.0      |
| Granada              | 2000-2012       | 793                | 0.0              | 0.0     | 0.1   | 792               | 2.3  | 0.4   | 771               | 88.5                           | 0.1                     | 0.5               | 0.0      |
| Mallorca             | 2000-2012       | 755                | 1.1              | 0.5     | 6.4   | 695               | 2.2  | 0.3   | 678               | 94.0                           | 1.2                     | 1.2               | 0.0      |
| Murcia               | 2000-2010       | 1,000              | 0.0              | 0.0     | 0.9   | 991               | 2.5  | 0.3   | 963               | 91.5                           | 9.6                     | 0.0               | 0.0      |
| Navarra              | 2000-2010       | 541                | 0.0              | 0.0     | 0.7   | 537               | 0.9  | 0.0   | 532               | 90.2                           | 1.3                     | 0.2               | 0.0      |
| Tarragona            | 2000-2011       | 648                | 0.6              | 0.6     | 6.5   | 598               | 5.7  | 0.5   | 561               | 90.6                           | 0.4                     | 0.0               | 0.0      |
| Spain Childhood      | -               | -                  | -                | -       | -     | -                 | -    | -     | -                 | -                              | -                       | -                 | -        |
| Valencia Childhood   | -               | -                  | -                | -       | -     | -                 | -    | -     | -                 | -                              | -                       | -                 | -        |
| Sweden *             | 2000-2014       | 16,471             | 0.0              | 0.2     | 24.4  | 12,415            | 1.3  | 1.0   | 12,132            | 99.8                           | 0.6                     | 0.1               | 0.0      |
| Swiss registries     | 2000-2014       | 5,421              | 0.0              | 0.1     | 6.9   | 5,040             | 1.2  | 0.4   | 4,964             | 95.4                           | 2.5                     | 3.7               | 3.6      |
| Basel                | 2000-2011       | 258                | 0.0              | 0.0     | 0.8   | 256               | 0.8  | 4.7   | 242               | 100.0                          | 0.0                     | 0.4               | 10.7     |
| Fribourg             | 2006-2014       | 222                | 0.0              | 0.0     | 18.0  | 182               | 0.0  | 1.6   | 179               | 97.8                           | 3.4                     | 2.8               | 0.0      |
| Geneva               | 2000-2013       | 773                | 0.0              | 0.1     | 21.6  | 605               | 0.8  | 0.2   | 599               | 94.0                           | 6.3                     | 4.7               | 0.0      |
| Graubünden-Glarus    | 2000-2014       | 359                | 0.0              | 0.0     | 2.8   | 349               | 0.3  | 0.3   | 347               | 90.2                           | 0.3                     | 28.0              | 0.0      |
| Neuchâtel            | 2000-2014       | 347                | 0.0              | 0.6     | 15.0  | 293               | 3.4  | 0.3   | 282               | 91.8                           | 0.7                     | 2.1               | 2.1      |
| St Gallen-Appenzell  | 2000-2014       | 743                | 0.0              | 0.0     | 1.1   | 735               | 0.1  | 0.0   | 734               | 94.4                           | 0.0                     | 1.6               | 0.0      |
| Ticino               | 2000-2014       | 551                | 0.0              | 0.0     | 0.4   | 549               | 1.1  | 0.0   | 543               | 98.3                           | 2.2                     | 2.6               | 0.0      |
| Valais               | 2000-2014       | 532                | 0.0              | 0.9     | 12.8  | 459               | 0.7  | 0.0   | 456               | 95.6                           | 0.2                     | 1.3               | 0.0      |

Web-table 2.11: Data quality indicators, women diagnosed during 2000-2014, by continent, country and registry: OVARY

|                              | Calendar period | Patients submitted | Ineligible (%) ¶ |            |            | Eligible patients | Excluded (%) ¶¶ |            | Patients included | Data quality indicators (%) †† |                         |                   |            |
|------------------------------|-----------------|--------------------|------------------|------------|------------|-------------------|-----------------|------------|-------------------|--------------------------------|-------------------------|-------------------|------------|
|                              |                 |                    | Incomplete dates | In situ    | Other      |                   | DCO             | Other      |                   | MV                             | Non-specific morphology | Lost to follow-up | Censored   |
| Zürich                       | 2000-2013       | 1,636              | 0.0              | 0.0        | 1.5        | 1,612             | 1.9             | 0.0        | 1,582             | 96.3                           | 4.2                     | 0.9               | 9.3        |
| Switzerland (Childhood) †    | -               | -                  |                  |            |            |                   |                 |            |                   |                                |                         |                   |            |
| United Kingdom *             | 2000-2014       | 120,404            | 0.1              | 0.2        | 15.4       | 101,509           | 2.3             | 2.1        | 97,061            | 94.3                           | 5.5                     | 1.4               | 0.0        |
| England                      | 2000-2014       | 99,148             | 0.1              | 0.2        | 15.2       | 83,749            | 2.5             | 2.4        | 79,625            | 95.3                           | 5.7                     | 1.7               | 0.0        |
| Northern Ireland             | 2000-2014       | 3,426              | 0.8              | 0.6        | 22.7       | 2,602             | 1.0             | 0.1        | 2,574             | 88.1                           | 13.0                    | 0.0               | 0.0        |
| Scotland                     | 2000-2014       | 11,042             | 0.0              | 0.1        | 13.8       | 9,505             | 0.7             | 0.0        | 9,440             | 87.3                           | 0.8                     | 0.1               | 0.0        |
| Wales                        | 2000-2014       | 6,788              | 0.0              | 0.1        | 16.6       | 5,653             | 3.0             | 1.1        | 5,422             | 94.6                           | 6.9                     | 0.0               | 0.0        |
| <b>OCEANIA</b>               |                 | <b>28,819</b>      | <b>0.4</b>       | <b>0.2</b> | <b>6.4</b> | <b>26,807</b>     | <b>2.0</b>      | <b>1.6</b> | <b>25,841</b>     | <b>94.7</b>                    | <b>5.7</b>              | <b>0.0</b>        | <b>0.0</b> |
| Australia *                  | 2000-2014       | 23,877             | 0.4              | 0.3        | 7.7        | 21,865            | 1.8             | 1.6        | 21,124            | 95.3                           | 4.9                     | 0.0               | 0.0        |
| Australian Capital Territory | 2000-2013       | 373                | 0.0              | 0.8        | 13.9       | 318               | 1.3             | 1.9        | 308               | 97.4                           | 2.9                     | 0.0               | 0.0        |
| New South Wales              | 2000-2012       | 6,571              | 0.2              | 0.0        | 1.2        | 6,482             | 2.0             | 2.1        | 6,219             | 97.4                           | 3.6                     | 0.0               | 0.0        |
| Northern Territory           | 2000-2013       | 105                | 0.0              | 0.0        | 1.0        | 104               | 1.0             | 1.0        | 102               | 97.1                           | 2.9                     | 0.0               | 0.0        |
| Queensland                   | 2000-2014       | 6,509              | 1.4              | 0.5        | 24.2       | 4,809             | 1.4             | 2.2        | 4,633             | 97.1                           | 4.3                     | 0.0               | 0.0        |
| South Australia              | 2000-2013       | 1,708              | 0.1              | 0.0        | 0.5        | 1,699             | 0.1             | 2.1        | 1,662             | 91.0                           | 1.4                     | 0.0               | 0.0        |
| Tasmania                     | 2000-2013       | 637                | 0.0              | 0.0        | 14.4       | 545               | 1.5             | 1.7        | 528               | 93.8                           | 7.4                     | 0.0               | 0.0        |
| Victoria                     | 2000-2014       | 6,101              | 0.0              | 0.4        | 0.7        | 6,036             | 3.1             | 0.7        | 5,811             | 92.8                           | 7.8                     | 0.0               | 0.0        |
| Western Australia            | 2000-2014       | 1,873              | 0.0              | 0.0        | 0.1        | 1,872             | 0.1             | 0.5        | 1,861             | 95.5                           | 4.8                     | 0.0               | 0.0        |
| New Zealand *                | 2000-2014       | 4,942              | 0.0              | 0.0        | 0.0        | 4,942             | 3.0             | 1.5        | 4,717             | 92.3                           | 9.4                     | 0.0               | 0.0        |
| <b>Total</b>                 |                 | <b>975,044</b>     | <b>0.4</b>       | <b>0.4</b> | <b>6.2</b> | <b>907,570</b>    | <b>3.0</b>      | <b>1.6</b> | <b>865,501</b>    | <b>94.1</b>                    | <b>5.6</b>              | <b>0.8</b>        | <b>0.9</b> |

Web-table 2.12: Data quality indicators, men diagnosed during 2000-2014, by continent, country and registry: PROSTATE

|                                    | Calendar period | Patients submitted | Ineligible (%) ¶ |            |            | Excluded (%) ¶¶   |             |            | Data quality indicators (%) ¶¶ |             |                         |                   |             |
|------------------------------------|-----------------|--------------------|------------------|------------|------------|-------------------|-------------|------------|--------------------------------|-------------|-------------------------|-------------------|-------------|
|                                    |                 |                    | Incomplete dates | In situ    | Other      | Eligible patients | DCO         | Other      | Patients included              | MV          | Non-specific morphology | Lost to follow-up | Censored    |
| <b>AFRICA</b>                      |                 | <b>3,466</b>       | <b>19.6</b>      | <b>0.0</b> | <b>0.1</b> | <b>2,784</b>      | <b>0.5</b>  | <b>1.5</b> | <b>2,726</b>                   | <b>90.5</b> | <b>17.2</b>             | <b>4.3</b>        | <b>36.8</b> |
| Algerian registries                | 2000-2014       | 932                | 14.2             | 0.0        | 0.3        | 797               | 1.1         | 3.0        | 764                            | 98.7        | 5.2                     | 0.0               | 25.8        |
| Annaba                             | 2000-2014       | 306                | 36.3             | 0.0        | 1.0        | 192               | 0.5         | 0.5        | 190                            | 95.8        | 0.0                     | 0.0               | 83.7        |
| Sétif                              | 2000-2010       | 310                | 6.8              | 0.0        | 0.0        | 289               | 0.0         | 6.6        | 270                            | 100.0       | 9.6                     | 0.0               | 14.1        |
| Tlemcen                            | 2006-2014       | 316                | 0.0              | 0.0        | 0.0        | 316               | 2.5         | 1.3        | 304                            | 99.3        | 4.6                     | 0.0               | 0.0         |
| Mali (Bamako)                      | -               | -                  | -                | -          | -          | -                 | -           | -          | -                              | -           | -                       | -                 | -           |
| Mauritius *                        | 2005-2012       | 642                | 0.0              | 0.0        | 0.0        | 642               | 0.0         | 2.2        | 628                            | 95.5        | 19.7                    | 0.0               | 0.0         |
| Morocco (Casablanca)               | -               | -                  | -                | -          | -          | -                 | -           | -          | -                              | -           | -                       | -                 | -           |
| Nigeria (Ibadan)                   | 2003-2014       | 1,391              | 39.3             | 0.0        | 0.0        | 844               | 0.7         | 0.6        | 833                            | 100.0       | 0.0                     | 0.0               | 79.5        |
| South Africa (Eastern Cape)        | 2000-2014       | 501                | 0.0              | 0.0        | 0.0        | 501               | 0.0         | 0.0        | 501                            | 55.7        | 60.7                    | 23.4              | 28.7        |
| <b>AMERICA (Central and South)</b> |                 | <b>138,788</b>     | <b>2.3</b>       | <b>0.3</b> | <b>0.0</b> | <b>135,035</b>    | <b>12.5</b> | <b>2.3</b> | <b>115,102</b>                 | <b>94.2</b> | <b>4.0</b>              | <b>0.4</b>        | <b>5.5</b>  |
| Argentinian registries             | 2002-2013       | 8,276              | 2.7              | 0.4        | 0.1        | 8,017             | 10.9        | 0.4        | 7,115                          | 98.4        | 2.7                     | 0.0               | 0.1         |
| Chubut                             | 2008-2013       | 347                | 63.1             | 6.3        | 0.3        | 105               | 12.4        | 19.0       | 72                             | 56.9        | 47.2                    | 0.0               | 1.4         |
| Córdoba                            | 2004-2012       | 3,206              | 0.1              | 0.3        | 0.1        | 3,191             | 9.2         | 0.0        | 2,899                          | 99.5        | 1.3                     | 0.0               | 0.1         |
| Mendoza                            | 2003-2013       | 4,654              | 0.0              | 0.0        | 0.0        | 4,652             | 12.2        | 0.2        | 4,076                          | 98.5        | 2.7                     | 0.0               | 0.0         |
| Tierra del Fuego                   | 2005-2013       | 69                 | 0.0              | 0.0        | 0.0        | 69                | 1.4         | 0.0        | 68                             | 92.6        | 8.8                     | 0.0               | 8.8         |
| Argentina (Childhood) †            | -               | -                  | -                | -          | -          | -                 | -           | -          | -                              | -           | -                       | -                 | -           |
| Brazilian registries               | 2000-2014       | 8,360              | 1.4              | 0.3        | 0.1        | 8,210             | 7.9         | 0.1        | 7,556                          | 98.3        | 1.8                     | 0.0               | 0.2         |
| Aracaju                            | 2000-2012       | 2,622              | 4.2              | 0.6        | 0.2        | 2,491             | 4.3         | 0.0        | 2,383                          | 99.1        | 1.0                     | 0.0               | 0.0         |
| Cuiabá                             | -               | -                  | -                | -          | -          | -                 | -           | -          | -                              | -           | -                       | -                 | -           |
| Curitiba                           | 2000-2012       | 5,170              | 0.0              | 0.1        | 0.1        | 5,158             | 10.3        | 0.1        | 4,619                          | 98.0        | 2.1                     | 0.0               | 0.0         |
| Goiânia                            | -               | -                  | -                | -          | -          | -                 | -           | -          | -                              | -           | -                       | -                 | -           |
| Jaú                                | 2000-2014       | 568                | 1.2              | 0.0        | 0.0        | 561               | 1.2         | 0.0        | 554                            | 97.3        | 3.1                     | 0.0               | 3.1         |
| São Paulo                          | -               | -                  | -                | -          | -          | -                 | -           | -          | -                              | -           | -                       | -                 | -           |
| Chilean registries                 | 2000-2012       | 5,100              | 0.0              | 0.0        | 0.0        | 5,098             | 5.5         | 0.0        | 4,816                          | 92.2        | 7.1                     | 0.0               | 21.6        |
| Antofagasta                        | 2003-2010       | 689                | 0.0              | 0.0        | 0.0        | 689               | 11.8        | 0.1        | 607                            | 93.7        | 6.3                     | 0.0               | 22.6        |
| Biobio                             | 2003-2012       | 1,234              | 0.0              | 0.0        | 0.1        | 1,233             | 4.1         | 0.0        | 1,183                          | 83.6        | 16.5                    | 0.0               | 12.2        |
| Concepción                         | 2006-2010       | 1,503              | 0.0              | 0.0        | 0.1        | 1,502             | 6.0         | 0.0        | 1,412                          | 92.3        | 7.8                     | 0.0               | 26.8        |
| Los Rios                           | 2000-2012       | 1,674              | 0.0              | 0.0        | 0.0        | 1,674             | 3.6         | 0.0        | 1,614                          | 97.8        | 0.1                     | 0.0               | 23.6        |
| Colombian registries               | 2000-2014       | 9,559              | 4.6              | 0.0        | 0.1        | 9,110             | 3.9         | 0.4        | 8,722                          | 90.6        | 9.0                     | 0.0               | 29.5        |
| Bucaramanga                        | -               | -                  | -                | -          | -          | -                 | -           | -          | -                              | -           | -                       | -                 | -           |
| Cali                               | 2000-2014       | 8,143              | 2.2              | 0.0        | 0.1        | 7,958             | 3.8         | 0.3        | 7,631                          | 90.3        | 9.1                     | 0.0               | 29.4        |
| Manizales                          | 2003-2012       | 853                | 25.6             | 0.0        | 0.0        | 635               | 1.6         | 1.7        | 614                            | 93.2        | 7.2                     | 0.0               | 36.6        |
| Pasto                              | 2000-2012       | 563                | 7.5              | 0.7        | 0.0        | 517               | 7.7         | 0.0        | 477                            | 91.8        | 10.1                    | 0.0               | 21.8        |
| Costa Rica *                       | 2002-2014       | 12,814             | 0.0              | 1.9        | 0.1        | 12,552            | 9.2         | 0.5        | 11,345                         | 90.8        | 11.6                    | 0.0               | 0.0         |
| Cuba *                             | 2000-2012       | 34,604             | 0.0              | 0.0        | 0.0        | 34,601            | 30.3        | 7.9        | 21,358                         | 87.3        | 0.0                     | 0.0               | 0.0         |
| Ecuadorian registries              | 2000-2013       | 9,884              | 8.9              | 0.3        | 0.1        | 8,970             | 10.1        | 1.4        | 7,939                          | 93.0        | 8.2                     | 0.1               | 3.5         |
| Cuenca                             | 2000-2012       | 940                | 44.9             | 0.4        | 0.0        | 514               | 7.8         | 0.0        | 474                            | 92.4        | 7.6                     | 0.0               | 36.9        |
| Guayaquil                          | 2005-2013       | 2,422              | 0.1              | 0.1        | 0.2        | 2,413             | 9.4         | 5.2        | 2,061                          | 89.0        | 11.5                    | 0.0               | 0.0         |
| Loja                               | 2000-2013       | 388                | 0.0              | 1.3        | 0.3        | 382               | 5.2         | 0.0        | 362                            | 74.3        | 26.8                    | 2.8               | 0.0         |
| Manabí                             | 2000-2013       | 1,361              | 5.6              | 0.1        | 0.1        | 1,282             | 21.5        | 0.0        | 1,006                          | 88.0        | 12.4                    | 0.0               | 0.4         |
| Quito                              | 2000-2013       | 4,773              | 7.9              | 0.3        | 0.1        | 4,379             | 7.8         | 0.0        | 4,036                          | 98.0        | 3.9                     | 0.0               | 2.5         |
| Guadeloupe *                       | 2008-2013       | 3,390              | 0.0              | 0.0        | 0.0        | 3,390             | 0.0         | 0.0        | 3,389                          | 100.0       | 0.0                     | 0.0               | 72.3        |
| Martinique *                       | 2000-2012       | 6,512              | 0.0              | 0.0        | 0.0        | 6,512             | 0.0         | 0.5        | 6,480                          | 99.8        | 0.0                     | 7.1               | 0.0         |
| Mexico (Childhood) †               | -               | -                  | -                | -          | -          | -                 | -           | -          | -                              | -           | -                       | -                 | -           |
| Peru (Lima)                        | -               | -                  | -                | -          | -          | -                 | -           | -          | -                              | -           | -                       | -                 | -           |
| Puerto Rico *                      | 2000-2011       | 32,810             | 4.9              | 0.2        | 0.0        | 31,158            | 4.1         | 0.1        | 29,855                         | 99.2        | 1.4                     | 0.0               | 0.0         |
| Uruguay *                          | 2008-2012       | 7,479              | 0.0              | 0.8        | 0.0        | 7,417             | 11.9        | 0.1        | 6,527                          | 89.3        | 11.1                    | 0.0               | 0.0         |
| <b>AMERICA (North)</b>             |                 | <b>2,762,568</b>   | <b>0.9</b>       | <b>0.1</b> | <b>0.0</b> | <b>2,735,562</b>  | <b>1.1</b>  | <b>0.1</b> | <b>2,703,952</b>               | <b>98.9</b> | <b>1.6</b>              | <b>2.0</b>        | <b>0.0</b>  |
| Canadian registries                | 2000-2014       | 260,399            | 0.2              | 0.5        | 0.0        | 258,532           | 0.6         | 0.1        | 256,736                        | 97.0        | 3.2                     | 0.0               | 0.0         |
| Alberta                            | 2000-2014       | 32,186             | 0.2              | 0.0        | 0.0        | 32,121            | 0.2         | 0.1        | 32,025                         | 95.3        | 4.9                     | 0.0               | 0.0         |
| British Columbia                   | 2000-2014       | 46,020             | 0.5              | 1.1        | 0.0        | 45,267            | 0.7         | 0.0        | 44,951                         | 98.5        | 1.5                     | 0.0               | 0.0         |
| Manitoba                           | 2000-2014       | 10,562             | 0.5              | 0.1        | 0.1        | 10,500            | 1.2         | 0.1        | 10,359                         | 95.9        | 4.2                     | 0.0               | 0.0         |
| New Brunswick                      | 2000-2014       | 9,362              | 0.0              | 0.1        | 0.1        | 9,352             | 0.1         | 0.0        | 9,339                          | 97.3        | 0.1                     | 0.0               | 0.0         |
| Newfoundland & Labrador            | 2000-2014       | 6,854              | 0.1              | 12.6       | 0.0        | 5,981             | 0.8         | 0.1        | 5,927                          | 98.8        | 1.4                     | 0.0               | 0.0         |
| Nova Scotia                        | 2000-2014       | 10,981             | 0.4              | 0.2        | 0.0        | 10,913            | 0.5         | 0.1        | 10,843                         | 97.7        | 2.5                     | 0.0               | 0.0         |
| Ontario                            | 2000-2014       | 130,908            | 0.0              | 0.0        | 0.0        | 130,907           | 0.5         | 0.2        | 129,977                        | 97.0        | 3.4                     | 0.0               | 0.0         |
| Prince Edward Island               | 2000-2014       | 1,928              | 0.0              | 0.5        | 0.0        | 1,918             | 2.0         | 0.1        | 1,878                          | 96.3        | 3.8                     | 0.0               | 0.0         |
| Saskatchewan                       | 2000-2014       | 11,598             | 0.1              | 0.0        | 0.1        | 11,573            | 1.1         | 0.1        | 11,437                         | 95.5        | 4.7                     | 0.0               | 0.0         |
| US registries                      | 2000-2014       | 2,502,169          | 1.0              | 0.0        | 0.0        | 2,477,030         | 1.1         | 0.1        | 2,447,216                      | 99.1        | 1.4                     | 2.2               | 0.0         |
| Alabama                            | 2000-2014       | 51,330             | 1.1              | 0.0        | 0.0        | 50,754            | 1.3         | 0.1        | 50,050                         | 98.3        | 2.0                     | 0.0               | 0.0         |
| Alaska                             | 2000-2013       | 4,845              | 4.4              | 0.1        | 0.0        | 4,628             | 0.4         | 0.1        | 4,605                          | 98.2        | 3.1                     | 0.0               | 0.0         |
| Arkansas                           | 2000-2011       | 26,510             | 0.2              | 0.1        | 0.0        | 26,423            | 0.3         | 0.1        | 26,312                         | 99.7        | 0.5                     | 0.0               | 0.0         |
| California                         | 2000-2011       | 265,614            | 1.8              | 0.0        | 0.0        | 260,589           | 0.9         | 0.1        | 258,112                        | 99.3        | 1.0                     | 0.0               | 0.0         |
| Greater Bay Area                   | 2000-2014       | 66,463             | 1.2              | 0.0        | 0.0        | 65,623            | 0.7         | 0.1        | 65,107                         | 99.4        | 0.8                     | 9.4               | 0.0         |
| Greater California                 | 2000-2014       | 175,066            | 2.1              | 0.0        | 0.0        | 171,355           | 1.0         | 0.1        | 169,510                        | 99.0        | 1.3                     | 9.9               | 0.0         |
| Los Angeles                        | 2000-2014       | 79,371             | 1.8              | 0.0        | 0.0        | 77,922            | 0.7         | 0.1        | 77,299                         | 99.3        | 0.9                     | 17.1              | 0.0         |
| Colorado                           | 2000-2013       | 43,581             | 0.5              | 0.0        | 0.0        | 43,342            | 1.5         | 0.1        | 42,651                         | 98.8        | 1.5                     | 0.0               | 0.0         |
| Connecticut                        | 2000-2014       | 41,587             | 0.4              | 0.0        | 0.0        | 41,387            | 0.8         | 0.1        | 41,046                         | 99.5        | 1.0                     | 2.5               | 0.0         |
| Delaware                           | 2000-2014       | 11,532             | 0.3              | 0.0        | 0.0        | 11,494            | 1.0         | 0.1        | 11,365                         | 99.6        | 0.4                     | 0.0               | 0.0         |
| Florida                            | 2000-2013       | 206,307            | 0.1              | 0.0        | 0.0        | 205,974           | 1.2         | 0.1        | 203,262                        | 99.4        | 2.3                     | 0.0               | 0.0         |
| Georgia                            | 2000-2014       | 89,607             | 0.0              | 0.0        | 0.0        | 89,563            | 1.2         | 0.1        | 88,429                         | 99.3        | 1.2                     | 0.0               | 0.0         |
| Atlanta                            | 2000-2014       | 29,400             | 0.0              | 0.0        | 0.0        | 29,387            | 0.6         | 0.2        | 29,176                         | 99.4        | 0.9                     | 0.0               | 0.0         |
| Hawaii                             | 2000-2014       | 11,857             | 0.3              | 0.0        | 0.0        | 11,821            | 0.8         | 0.1        | 11,718                         | 98.8        | 1.3                     | 3.0               | 0.0         |
| Idaho                              | 2000-2014       | 16,159             | 0.8              | 0.0        | 0.0        | 16,017            | 1.7         | 0.0        | 15,730                         | 99.5        | 0.6                     | 0.0               | 0.0         |
| Indiana                            | 2000-2014       | 55,891             | 0.8              | 0.1        | 0.0        | 55,395            | 1.5         | 0.1        | 54,512                         | 99.2        | 1.1                     | 0.0               | 0.0         |
| Iowa                               | 2000-2014       | 32,444             | 0.7              | 0.0        | 0.0        | 32,222            | 0.8         | 0.1        | 31,932                         | 99.2        | 1.0                     | 1.6               | 0.0         |
| Kentucky                           | 2000-2014       | 42,372             | 0.0              | 0.0        | 0.0        | 42,361            | 0.6         | 0.1        | 42,059                         | 98.5        | 1.7                     | 2.4               | 0.0         |
| Louisiana                          | 2000-2014       | 51,454             | 0.4              | 0.0        | 0.0        | 51,254            | 0.6         | 0.1        | 50,891                         | 99.5        | 0.7                     | 2.3               | 0.0         |
| Maine                              | 2000-2013       | 15,410             | 0.1              | 0.0        | 0.0        | 15,378            | 1.3         | 0.1        | 15,168                         | 99.2        | 0.9                     | 0.0               | 0.0         |
| Massachusetts                      | 2000-2009       | 52,257             | 0.1              | 0.0        | 0.0        | 52,210            | 1.1         | 0.1        | 51,618                         | 98.5        | 1.6                     | 0.0               | 0.0         |
| Michigan                           | 2000-2013       | 115,390            | 0.4              | 0.1        | 0.0        | 114,793           | 0.5         | 0.1        | 114,079                        | 99.1        | 1.1                     | 0.0               | 0.0         |

Web-table 2.12: Data quality indicators, men diagnosed during 2000-2014, by continent, country and registry: PROSTATE

|                     | Calendar period | Patients submitted | Ineligible (%) ¶ |            |            | Excluded (%) ¶¶   |            |            | Patients included | Data quality indicators (%) †† |                         |                   |            |
|---------------------|-----------------|--------------------|------------------|------------|------------|-------------------|------------|------------|-------------------|--------------------------------|-------------------------|-------------------|------------|
|                     |                 |                    | Incomplete dates | In situ    | Other      | Eligible patients | DCO        | Other      |                   | MV                             | Non-specific morphology | Lost to follow-up | Censored   |
| Detroit             | 2000-2014       | 52,692             | 0.7              | 0.0        | 0.0        | 52,321            | 0.7        | 0.1        | 51,923            | 99.8                           | 0.3                     | 3.7               | 0.1        |
| Minnesota           | 2000-2013       | 57,357             | 0.0              | 0.0        | 0.0        | 57,319            | 1.4        | 0.1        | 56,497            | 100.0                          | 0.1                     | 0.0               | 0.0        |
| Mississippi         | 2002-2014       | 28,586             | 0.5              | 0.0        | 0.0        | 28,436            | 1.4        | 0.0        | 28,036            | 99.7                           | 0.5                     | 0.0               | 0.0        |
| Missouri            | -               | -                  | -                | -          | -          | -                 | -          | -          | -                 | -                              | -                       | -                 | -          |
| Montana             | 2000-2014       | 12,912             | 1.2              | 0.0        | 0.0        | 12,750            | 1.6        | 0.1        | 12,544            | 99.3                           | 0.8                     | 0.0               | 0.0        |
| Nebraska            | 2000-2014       | 19,201             | 0.5              | 0.0        | 0.0        | 19,100            | 1.2        | 0.1        | 18,860            | 99.1                           | 1.1                     | 0.0               | 0.0        |
| New Hampshire       | 2000-2014       | 15,440             | 0.2              | 0.0        | 0.0        | 15,402            | 0.9        | 0.1        | 15,243            | 99.1                           | 0.9                     | 0.0               | 0.0        |
| New Jersey          | 2000-2014       | 107,873            | 0.9              | 0.0        | 0.0        | 106,859           | 0.6        | 0.1        | 106,155           | 99.5                           | 0.8                     | 45.7              | 0.0        |
| New Mexico          | 2000-2014       | 18,811             | 0.0              | 0.0        | 0.0        | 18,801            | 1.4        | 0.1        | 18,516            | 99.8                           | 0.4                     | 4.9               | 0.2        |
| New York            | 2000-2014       | 225,020            | 3.4              | 0.0        | 0.0        | 217,265           | 0.5        | 0.1        | 215,974           | 99.3                           | 1.0                     | 0.0               | 0.0        |
| New York City       | 2000-2014       | 82,450             | 4.6              | 0.0        | 0.0        | 78,679            | 0.6        | 0.1        | 78,153            | 99.6                           | 0.7                     | 0.0               | 0.0        |
| North Carolina      | 2000-2014       | 97,909             | 0.0              | 0.0        | 0.0        | 97,879            | 1.5        | 0.1        | 96,317            | 99.2                           | 1.2                     | 0.0               | 0.0        |
| Ohio                | 2000-2014       | 119,908            | 0.1              | 0.1        | 0.0        | 119,703           | 2.1        | 0.1        | 117,117           | 99.3                           | 1.0                     | 0.0               | 0.0        |
| Oklahoma            | 2000-2010       | 28,357             | 0.5              | 0.0        | 0.0        | 28,197            | 2.3        | 0.1        | 27,533            | 99.1                           | 1.2                     | 0.0               | 0.0        |
| Oregon              | 2000-2013       | 37,307             | 0.2              | 0.0        | 0.0        | 37,207            | 1.8        | 0.0        | 36,522            | 98.9                           | 1.4                     | 0.0               | 0.0        |
| Pennsylvania        | 2000-2014       | 151,610            | 1.4              | 0.1        | 0.0        | 149,387           | 1.3        | 0.1        | 147,278           | 99.4                           | 0.8                     | 0.0               | 0.0        |
| Rhode Island        | 2000-2014       | 11,800             | 0.2              | 0.1        | 0.0        | 11,773            | 1.2        | 0.1        | 11,616            | 99.1                           | 1.1                     | 0.0               | 0.0        |
| South Carolina      | 2000-2014       | 51,321             | 0.0              | 0.0        | 0.0        | 51,313            | 1.8        | 0.1        | 50,324            | 99.6                           | 0.5                     | 0.0               | 0.0        |
| Tennessee           | 2000-2011       | 47,473             | 0.7              | 0.0        | 0.0        | 47,141            | 1.7        | 0.1        | 46,310            | 99.6                           | 0.6                     | 0.0               | 0.0        |
| Texas               | 2000-2013       | 180,338            | 1.7              | 0.1        | 0.0        | 177,099           | 1.4        | 0.1        | 174,441           | 96.5                           | 5.2                     | 0.0               | 0.0        |
| Utah                | 2000-2014       | 22,843             | 0.2              | 0.0        | 0.0        | 22,780            | 0.3        | 0.1        | 22,697            | 99.3                           | 0.9                     | 3.9               | 0.1        |
| Vermont             | 2000-2013       | 6,753              | 0.4              | 0.0        | 0.0        | 6,724             | 1.4        | 0.0        | 6,625             | 99.3                           | 0.9                     | 0.0               | 0.0        |
| Washington          | 2000-2008       | 42,012             | 0.5              | 0.0        | 0.0        | 41,803            | 0.8        | 0.1        | 41,437            | 99.0                           | 1.2                     | 0.0               | 0.0        |
| Seattle             | 2000-2014       | 47,862             | 0.4              | 0.0        | 0.0        | 47,652            | 0.6        | 0.1        | 47,336            | 98.9                           | 1.2                     | 1.7               | 0.0        |
| West Virginia       | 2000-2014       | 20,454             | 0.7              | 0.0        | 0.0        | 20,299            | 0.8        | 0.0        | 20,134            | 99.0                           | 1.3                     | 0.0               | 0.0        |
| Wisconsin           | 2000-2013       | 58,946             | 0.8              | 0.1        | 0.0        | 58,414            | 1.1        | 0.1        | 57,737            | 99.5                           | 0.6                     | 0.0               | 0.0        |
| Wyoming             | 2000-2013       | 5,791              | 0.3              | 0.0        | 0.0        | 5,774             | 0.1        | 0.0        | 5,764             | 99.5                           | 0.6                     | 0.0               | 0.0        |
| <b>ASIA</b>         |                 | <b>422,179</b>     | <b>1.2</b>       | <b>0.9</b> | <b>0.0</b> | <b>413,223</b>    | <b>3.5</b> | <b>0.2</b> | <b>397,673</b>    | <b>94.4</b>                    | <b>6.5</b>              | <b>0.3</b>        | <b>1.9</b> |
| Chinese registries  | 2003-2013       | 12,513             | 0.2              | 0.0        | 0.0        | 12,485            | 0.8        | 0.0        | 12,380            | 76.9                           | 26.3                    | 7.0               | 0.1        |
| Beijing             | 2003-2013       | 7,627              | 0.0              | 0.0        | 0.0        | 7,621             | 0.6        | 0.0        | 7,577             | 81.8                           | 18.2                    | 10.5              | 0.1        |
| Changle             | 2003-2013       | 83                 | 4.8              | 0.0        | 0.0        | 79                | 0.0        | 0.0        | 79                | 68.4                           | 45.6                    | 0.0               | 0.0        |
| Cixian              | 2003-2013       | 42                 | 0.0              | 0.0        | 0.0        | 42                | 0.0        | 0.0        | 42                | 76.2                           | 26.2                    | 0.0               | 0.0        |
| Dafeng              | 2003-2013       | 131                | 0.0              | 0.0        | 0.0        | 131               | 0.8        | 0.0        | 130               | 72.3                           | 55.4                    | 0.0               | 0.0        |
| Dalian              | 2003-2013       | 1,242              | 0.0              | 0.0        | 0.1        | 1,241             | 3.9        | 0.0        | 1,193             | 77.5                           | 25.8                    | 0.0               | 0.0        |
| Donghai             | 2005-2013       | 98                 | 0.0              | 0.0        | 0.0        | 98                | 3.1        | 0.0        | 95                | 41.1                           | 58.9                    | 6.3               | 0.0        |
| Feicheng            | 2003-2013       | 131                | 0.0              | 0.0        | 0.0        | 131               | 0.0        | 0.0        | 131               | 58.0                           | 44.3                    | 1.5               | 0.0        |
| Ganyu               | 2003-2013       | 96                 | 0.0              | 0.0        | 0.0        | 96                | 0.0        | 0.0        | 96                | 15.6                           | 88.5                    | 1.0               | 0.0        |
| Guanyun             | 2004-2013       | 104                | 0.0              | 0.0        | 0.0        | 104               | 2.9        | 0.0        | 101               | 56.4                           | 84.2                    | 4.0               | 0.0        |
| Haimen              | 2003-2013       | 534                | 0.0              | 0.0        | 0.0        | 534               | 0.0        | 0.0        | 534               | 60.1                           | 39.9                    | 0.2               | 0.0        |
| Haining             | 2003-2013       | 319                | 0.0              | 0.0        | 0.0        | 319               | 0.3        | 0.0        | 318               | 85.8                           | 37.1                    | 0.3               | 0.0        |
| Jianhu              | 2003-2013       | 98                 | 0.0              | 0.0        | 0.0        | 98                | 0.0        | 0.0        | 98                | 69.4                           | 77.6                    | 5.1               | 0.0        |
| Jiashan             | 2003-2013       | 210                | 0.0              | 0.0        | 0.0        | 210               | 0.5        | 0.0        | 209               | 70.3                           | 30.1                    | 0.0               | 0.0        |
| Jintan              | 2003-2013       | 131                | 0.0              | 0.0        | 0.0        | 131               | 2.3        | 0.0        | 128               | 45.3                           | 54.7                    | 0.0               | 0.0        |
| Lianyungang         | 2008-2013       | 177                | 0.0              | 0.0        | 0.0        | 177               | 0.0        | 0.0        | 177               | 74.6                           | 36.7                    | 16.9              | 0.6        |
| Linzhou             | 2003-2013       | 57                 | 0.0              | 0.0        | 0.0        | 57                | 0.0        | 0.0        | 57                | 66.7                           | 33.3                    | 0.0               | 0.0        |
| Qidong              | 2003-2013       | 559                | 0.0              | 0.0        | 0.2        | 558               | 0.0        | 0.0        | 558               | 64.0                           | 36.0                    | 1.1               | 0.0        |
| Sihui               | 2003-2013       | 69                 | 2.9              | 0.0        | 0.0        | 67                | 1.5        | 0.0        | 66                | 78.8                           | 43.9                    | 3.0               | 0.0        |
| Taixing             | 2003-2013       | 145                | 9.0              | 0.0        | 0.0        | 132               | 0.0        | 0.0        | 132               | 73.5                           | 83.3                    | 6.8               | 0.0        |
| Yangzhong           | 2003-2013       | 26                 | 0.0              | 0.0        | 0.0        | 26                | 0.0        | 0.0        | 26                | 84.6                           | 100.0                   | 0.0               | 0.0        |
| Zhongshan           | 2003-2013       | 634                | 0.0              | 0.0        | 0.2        | 633               | 0.0        | 0.0        | 633               | 74.1                           | 28.3                    | 0.0               | 0.0        |
| Cyprus *            | 2004-2014       | 4,577              | 3.5              | 0.0        | 0.1        | 4,413             | 7.4        | 0.0        | 4,088             | 98.7                           | 1.5                     | 0.0               | 48.3       |
| Hong Kong *         | -               | -                  | -                | -          | -          | -                 | -          | -          | -                 | -                              | -                       | -                 | -          |
| Indian registries   | 2000-2014       | 186                | 0.0              | 0.0        | 0.0        | 186               | 1.6        | 0.0        | 183               | 85.2                           | 18.0                    | 1.6               | 0.0        |
| Guwahati            | -               | -                  | -                | -          | -          | -                 | -          | -          | -                 | -                              | -                       | -                 | -          |
| Karunagappally      | 2000-2014       | 186                | 0.0              | 0.0        | 0.0        | 186               | 1.6        | 0.0        | 183               | 85.2                           | 18.0                    | 1.6               | 0.0        |
| Iran (Golestan)     | -               | -                  | -                | -          | -          | -                 | -          | -          | -                 | -                              | -                       | -                 | -          |
| Israel *            | 2000-2013       | 33,770             | 0.0              | 0.4        | 0.1        | 33,619            | 3.2        | 0.1        | 32,503            | 93.7                           | 6.5                     | 0.0               | 0.0        |
| Japanese registries | 2000-2014       | 184,846            | 2.0              | 0.0        | 0.1        | 180,873           | 6.8        | 0.1        | 168,505           | 93.7                           | 8.3                     | 0.0               | 2.5        |
| Aichi               | 2003-2013       | 30,274             | 0.3              | 0.0        | 0.1        | 30,146            | 5.0        | 0.0        | 28,633            | 96.5                           | 4.4                     | 0.0               | 2.0        |
| Akita               | 2010-2014       | 3,296              | 1.0              | 0.1        | 0.1        | 3,257             | 0.0        | 2.1        | 3,188             | 95.2                           | 8.2                     | 0.0               | 55.5       |
| Ehime               | 2007-2013       | 5,802              | 0.1              | 0.0        | 0.1        | 5,790             | 9.9        | 0.0        | 5,215             | 95.3                           | 5.5                     | 0.0               | 0.0        |
| Fukui               | 2003-2009       | 2,319              | 0.4              | 0.0        | 0.0        | 2,310             | 0.0        | 0.0        | 2,310             | 98.9                           | 1.2                     | 0.0               | 2.6        |
| Gunma               | 2003-2012       | 10,310             | 29.8             | 0.0        | 0.0        | 7,232             | 6.0        | 0.0        | 6,792             | 95.3                           | 7.7                     | 0.0               | 1.9        |
| Hiroshima           | 2004-2008       | 6,604              | 0.5              | 0.4        | 0.2        | 6,532             | 3.6        | 0.0        | 6,298             | 98.9                           | 1.1                     | 0.0               | 0.4        |
| Hyogo               | 2007-2012       | 14,315             | 0.4              | 0.0        | 0.1        | 14,239            | 11.4       | 0.0        | 12,609            | 97.4                           | 3.5                     | 0.0               | 1.6        |
| Ibaraki             | 2006-2012       | 9,006              | 0.3              | 0.1        | 0.1        | 8,965             | 8.8        | 0.0        | 8,176             | 94.9                           | 9.1                     | 0.0               | 1.5        |
| Kanagawa            | 2000-2013       | 41,872             | 0.0              | 0.0        | 0.0        | 41,839            | 7.5        | 0.0        | 38,691            | 89.8                           | 17.1                    | 0.0               | 0.0        |
| Miyagi              | 2000-2010       | 11,944             | 2.6              | 0.1        | 0.0        | 11,623            | 4.8        | 0.0        | 11,068            | 93.3                           | 6.8                     | 0.0               | 1.9        |
| Niigata             | 2000-2013       | 11,461             | 0.4              | 0.0        | 0.1        | 11,414            | 7.0        | 0.0        | 10,618            | 89.7                           | 0.3                     | 0.0               | 0.0        |
| Osaka               | 2000-2008       | 17,075             | 0.0              | 0.0        | 0.0        | 17,068            | 8.5        | 0.0        | 15,612            | 93.4                           | 8.3                     | 0.0               | 6.0        |
| Saga                | 2006-2013       | 2,803              | 0.9              | 0.1        | 0.0        | 2,775             | 4.9        | 0.0        | 2,639             | 89.5                           | 11.7                    | 0.0               | 0.0        |
| Tochigi             | 2006-2013       | 8,132              | 0.2              | 0.0        | 0.1        | 8,105             | 7.4        | 0.0        | 7,505             | 95.5                           | 6.3                     | 0.0               | 1.0        |
| Yamagata            | 2003-2013       | 7,171              | 0.6              | 0.0        | 0.0        | 7,123             | 3.9        | 0.0        | 6,847             | 91.6                           | 9.9                     | 0.0               | 0.8        |
| Yamanashi           | 2008-2012       | 2,462              | 0.2              | 0.0        | 0.0        | 2,455             | 6.2        | 0.0        | 2,304             | 94.7                           | 6.1                     | 0.0               | 0.5        |
| Jordan *            | 2000-2014       | 2,501              | 0.1              | 0.2        | 0.2        | 2,487             | 0.2        | 1.0        | 2,457             | 99.5                           | 1.7                     | 4.7               | 0.0        |
| Korea * ‡           | 2000-2014       | 84,416             | 0.6              | 0.0        | 0.0        | 83,951            | 0.0        | 0.1        | 83,892            | 96.3                           | 4.4                     | 0.0               | 0.0        |
| Kuwait *            | 2000-2013       | 521                | 0.0              | 0.6        | 0.0        | 518               | 1.7        | 0.0        | 509               | 100.0                          | 0.0                     | 0.8               | 0.2        |
| Malaysia (Penang)   | 2000-2013       | 938                | 0.3              | 0.0        | 0.0        | 935               | 0.3        | 1.8        | 915               | 97.0                           | 6.0                     | 0.0               | 10.2       |
| Mongolia *          | -               | -                  | -                | -          | -          | -                 | -          | -          | -                 | -                              | -                       | -                 | -          |
| Qatar *             | 2000-2014       | 591                | 0.0              | 0.0        | 0.0        | 591               | 0.7        | 0.2        | 586               | 95.9                           | 4.3                     | 0.0               | 59.7       |
| Singapore *         | 2000-2014       | 8,192              | 0.0              | 2.1        | 0.1        | 8,015             | 0.2        | 0.1        | 7,991             | 96.5                           | 0.5                     | 0.0               | 0.0        |
| Taiwan *            | 2000-2014       | 52,824             | 0.1              | 0.2        | 0.0        | 52,681            | 0.0        | 0.0        | 52,681            | 97.3                           | 0.2                     | 0.0               | 0.0        |

Web-table 2.12: Data quality indicators, men diagnosed during 2000-2014, by continent, country and registry: PROSTATE

|                                | Calendar period | Patients submitted | Ineligible (%) ¶ |            |            | Excluded (%) ¶¶   |            |            | Patients included | Data quality indicators (%) ¶¶ |                         |                   |            |
|--------------------------------|-----------------|--------------------|------------------|------------|------------|-------------------|------------|------------|-------------------|--------------------------------|-------------------------|-------------------|------------|
|                                |                 |                    | Incomplete dates | In situ    | Other      | Eligible patients | DCO        | Other      |                   | MV                             | Non-specific morphology | Lost to follow-up | Censored   |
| Thai registries                | 2000-2014       | 6,825              | 0.0              | 0.0        | 0.2        | 6,812             | 3.1        | 10.8       | 5,869             | 84.2                           | 16.1                    | 0.1               | 3.1        |
| Bangkok                        | 2000-2012       | 4,164              | 0.0              | 0.0        | 0.3        | 4,152             | 3.8        | 17.6       | 3,264             | 88.5                           | 11.5                    | 0.0               | 0.0        |
| Khon Kaen                      | 2000-2014       | 519                | 0.0              | 0.0        | 0.0        | 519               | 0.4        | 0.2        | 516               | 78.5                           | 21.5                    | 0.0               | 6.0        |
| Lampang                        | 2000-2014       | 538                | 0.0              | 0.0        | 0.0        | 538               | 1.1        | 0.4        | 530               | 85.3                           | 14.7                    | 0.0               | 0.0        |
| Lamphun                        | 2000-2014       | 288                | 0.0              | 0.0        | 0.0        | 288               | 2.8        | 0.0        | 280               | 56.1                           | 43.9                    | 0.0               | 0.0        |
| Lopburi                        | 2000-2014       | 545                | 0.0              | 0.0        | 0.0        | 545               | 5.0        | 0.0        | 518               | 71.2                           | 28.8                    | 0.0               | 26.8       |
| Songkhla                       | 2000-2014       | 771                | 0.0              | 0.0        | 0.1        | 770               | 1.0        | 0.1        | 761               | 87.8                           | 14.1                    | 0.5               | 1.6        |
| Turkish registries             | 2000-2013       | 29,479             | 1.4              | 11.5       | 0.0        | 25,657            | 2.0        | 0.2        | 25,114            | 96.4                           | 5.9                     | 0.1               | 3.7        |
| Ankara                         | 2008-2012       | 6,638              | 0.0              | 1.6        | 0.0        | 6,533             | 0.6        | 0.2        | 6,480             | 99.8                           | 2.3                     | 0.0               | 1.3        |
| Antalya                        | 2006-2012       | 3,183              | 0.3              | 24.9       | 0.0        | 2,383             | 0.6        | 0.2        | 2,364             | 97.0                           | 4.6                     | 0.0               | 1.1        |
| Bursa                          | 2006-2012       | 2,194              | 3.1              | 0.0        | 0.0        | 2,124             | 4.7        | 0.1        | 2,022             | 93.9                           | 8.9                     | 0.0               | 0.0        |
| Edirne                         | 2006-2012       | 436                | 2.5              | 0.0        | 0.0        | 425               | 6.1        | 0.0        | 399               | 96.5                           | 4.3                     | 0.0               | 0.0        |
| Erzurum                        | 2006-2012       | 599                | 2.7              | 2.0        | 0.2        | 570               | 1.2        | 0.7        | 559               | 91.1                           | 11.4                    | 0.0               | 0.5        |
| Eskisehir                      | 2006-2012       | 992                | 0.0              | 1.2        | 0.0        | 980               | 1.3        | 0.0        | 967               | 94.8                           | 6.6                     | 1.2               | 0.2        |
| Izmir                          | 2000-2013       | 12,338             | 2.4              | 18.5       | 0.0        | 9,757             | 2.7        | 0.2        | 9,483             | 96.2                           | 6.2                     | 0.0               | 8.5        |
| Samsun                         | 2006-2012       | 1,694              | 0.0              | 5.0        | 0.0        | 1,610             | 1.7        | 0.1        | 1,581             | 94.3                           | 8.4                     | 1.5               | 0.0        |
| Trabzon                        | 2006-2012       | 1,405              | 1.4              | 7.9        | 0.0        | 1,275             | 1.3        | 0.0        | 1,259             | 88.5                           | 15.0                    | 0.0               | 0.3        |
| <b>EUROPE</b>                  |                 | <b>2,444,625</b>   | <b>0.2</b>       | <b>1.0</b> | <b>0.4</b> | <b>2,406,846</b>  | <b>2.0</b> | <b>0.1</b> | <b>2,355,249</b>  | <b>96.3</b>                    | <b>2.5</b>              | <b>1.1</b>        | <b>3.1</b> |
| Austria *                      | 2000-2014       | 78,087             | 0.0              | 0.5        | 0.0        | 77,687            | 3.1        | 0.2        | 75,082            | 98.9                           | 3.4                     | 0.0               | 0.0        |
| Belarus (Childhood) †          | -               | -                  | -                | -          | -          | -                 | -          | -          | -                 | -                              | -                       | -                 | -          |
| Belgium *                      | 2004-2014       | 100,855            | 0.0              | 3.5        | 0.0        | 97,341            | 0.0        | 0.0        | 97,316            | 99.7                           | 0.5                     | 1.5               | 0.0        |
| Bulgaria *                     | 2000-2014       | 27,814             | 0.0              | 0.0        | 0.0        | 27,805            | 5.8        | 0.0        | 26,190            | 92.5                           | 1.0                     | 0.0               | 0.0        |
| Croatia *                      | 2000-2014       | 23,908             | 0.0              | 0.8        | 0.0        | 23,719            | 6.9        | 0.0        | 22,066            | 85.7                           | 0.2                     | 0.0               | 0.0        |
| Czech Republic *               | 2000-2014       | 79,426             | 0.0              | 0.1        | 0.0        | 79,338            | 0.7        | 0.2        | 78,581            | 96.4                           | 0.2                     | 0.0               | 0.0        |
| Denmark *                      | 2000-2014       | 55,055             | 0.0              | 0.0        | 0.0        | 55,052            | 0.0        | 0.0        | 55,052            | 98.3                           | 4.2                     | 0.2               | 0.0        |
| Estonia *                      | 2000-2012       | 10,139             | 0.0              | 0.0        | 0.0        | 10,136            | 3.6        | 0.4        | 9,734             | 94.4                           | 0.2                     | 0.2               | 0.0        |
| Finland *                      | 2000-2014       | 67,538             | 0.3              | 0.0        | 0.0        | 67,315            | 0.9        | 0.0        | 66,706            | 99.5                           | 0.1                     | 0.1               | 0.0        |
| French registries              | 2000-2010       | 92,614             | 0.2              | 0.0        | 0.0        | 92,389            | 0.0        | 0.6        | 91,806            | 99.6                           | 0.7                     | 1.8               | 0.0        |
| Bas-Rhin                       | 2000-2010       | 10,244             | 0.0              | 0.0        | 0.0        | 10,242            | 0.0        | 0.4        | 10,204            | 99.3                           | 0.5                     | 0.9               | 0.0        |
| Basse Normandie                | -               | -                  | -                | -          | -          | -                 | -          | -          | -                 | -                              | -                       | -                 | -          |
| Burgundy Digestive             | -               | -                  | -                | -          | -          | -                 | -          | -          | -                 | -                              | -                       | -                 | -          |
| Calvados                       | 2000-2010       | 6,134              | 0.0              | 0.0        | 0.0        | 6,134             | 0.0        | 0.1        | 6,130             | 99.5                           | 0.8                     | 0.5               | 0.0        |
| Calvados Digestive             | -               | -                  | -                | -          | -          | -                 | -          | -          | -                 | -                              | -                       | -                 | -          |
| Côte-d'Or Gynaecologic         | -               | -                  | -                | -          | -          | -                 | -          | -          | -                 | -                              | -                       | -                 | -          |
| Côte-d'Or Haematopoietic       | -               | -                  | -                | -          | -          | -                 | -          | -          | -                 | -                              | -                       | -                 | -          |
| Doubs                          | 2000-2010       | 5,669              | 0.0              | 0.0        | 0.0        | 5,669             | 0.0        | 0.2        | 5,656             | 100.0                          | 0.2                     | 1.3               | 0.0        |
| Finistère                      | -               | -                  | -                | -          | -          | -                 | -          | -          | -                 | -                              | -                       | -                 | -          |
| Gironde CNS                    | -               | -                  | -                | -          | -          | -                 | -          | -          | -                 | -                              | -                       | -                 | -          |
| Gironde General                | 2005-2010       | 4,524              | 2.4              | 0.0        | 0.0        | 4,414             | 0.0        | 0.1        | 4,409             | 99.3                           | 1.9                     | 4.0               | 0.0        |
| Gironde Haematopoietic         | -               | -                  | -                | -          | -          | -                 | -          | -          | -                 | -                              | -                       | -                 | -          |
| Haut-Rhin                      | 2000-2010       | 7,396              | 0.0              | 0.0        | 0.0        | 7,395             | 0.0        | 0.5        | 7,357             | 99.8                           | 0.4                     | 2.5               | 0.0        |
| Haute-Vienne                   | 2009-2009       | 510                | 0.0              | 0.0        | 0.0        | 510               | 0.0        | 0.0        | 510               | 99.6                           | 0.0                     | 2.9               | 0.0        |
| Hérault                        | 2000-2010       | 10,586             | 0.0              | 0.0        | 0.0        | 10,585            | 0.0        | 1.0        | 10,479            | 99.4                           | 1.0                     | 2.0               | 0.0        |
| Isère                          | 2000-2010       | 10,954             | 0.0              | 0.0        | 0.0        | 10,952            | 0.0        | 1.4        | 10,795            | 99.8                           | 0.1                     | 0.8               | 0.0        |
| Lille Metro                    | 2008-2010       | 1,734              | 0.0              | 0.0        | 0.0        | 1,734             | 0.0        | 0.2        | 1,730             | 99.8                           | 0.1                     | 1.8               | 0.0        |
| Loire-Atlantique               | 2000-2010       | 19,626             | 0.5              | 0.0        | 0.0        | 19,517            | 0.0        | 0.9        | 19,341            | 99.8                           | 0.3                     | 2.2               | 0.0        |
| Manche                         | 2000-2010       | 5,385              | 0.0              | 0.0        | 0.0        | 5,385             | 0.0        | 0.3        | 5,370             | 99.7                           | 1.0                     | 2.1               | 0.0        |
| Somme                          | 2000-2010       | 5,216              | 0.0              | 0.0        | 0.0        | 5,216             | 0.0        | 0.5        | 5,191             | 99.1                           | 0.4                     | 2.6               | 0.0        |
| Tarn                           | 2000-2010       | 4,636              | 0.0              | 0.0        | 0.0        | 4,636             | 0.0        | 0.0        | 4,634             | 99.7                           | 4.0                     | 1.1               | 0.0        |
| France Childhood Haem †        | -               | -                  | -                | -          | -          | -                 | -          | -          | -                 | -                              | -                       | -                 | -          |
| France Childhood Solid †       | -               | -                  | -                | -          | -          | -                 | -          | -          | -                 | -                              | -                       | -                 | -          |
| German registries              | 2000-2014       | 309,196            | 0.2              | 0.2        | 0.1        | 307,600           | 7.4        | 0.0        | 284,771           | 98.9                           | 0.3                     | 0.3               | 24.5       |
| Brandenburg                    | 2000-2014       | 29,223             | 0.0              | 0.2        | 0.1        | 29,135            | 4.2        | 0.0        | 27,912            | 98.5                           | 0.2                     | 0.0               | 29.2       |
| Bremen                         | 2000-2013       | 6,783              | 0.0              | 0.1        | 0.3        | 6,753             | 7.0        | 0.0        | 6,277             | 98.3                           | 0.1                     | 3.5               | 0.0        |
| Hamburg                        | 2000-2013       | 16,596             | 0.0              | 0.0        | 0.0        | 16,596            | 6.4        | 0.0        | 15,524            | 99.3                           | 0.7                     | 4.3               | 0.0        |
| Lower Saxony                   | 2003-2013       | 80,070             | 0.9              | 0.0        | 0.0        | 79,298            | 8.2        | 0.0        | 72,788            | 99.9                           | 0.1                     | 0.0               | 31.7       |
| Mecklenburg-W. Pomerania       | 2000-2014       | 18,952             | 0.0              | 0.2        | 0.1        | 18,896            | 4.5        | 0.1        | 18,031            | 98.5                           | 0.2                     | 0.0               | 30.5       |
| Rhineland Palatinate           | 2000-2013       | 42,678             | 0.0              | 0.4        | 0.2        | 42,430            | 11.1       | 0.0        | 37,724            | 97.8                           | 0.1                     | 0.0               | 32.9       |
| Saarland                       | 2000-2012       | 9,721              | 0.0              | 0.2        | 0.1        | 9,690             | 2.3        | 0.0        | 9,460             | 99.5                           | 0.7                     | 0.0               | 0.0        |
| Saxony                         | 2000-2014       | 48,408             | 0.0              | 0.3        | 0.1        | 48,235            | 4.6        | 0.0        | 45,996            | 98.3                           | 0.7                     | 0.0               | 29.5       |
| Schleswig-Holstein             | 2000-2012       | 33,365             | 0.0              | 0.2        | 0.2        | 33,254            | 11.1       | 0.1        | 29,559            | 99.5                           | 0.7                     | 0.0               | 0.0        |
| Thuringia                      | 2000-2014       | 23,400             | 0.0              | 0.2        | 0.2        | 23,313            | 7.7        | 0.0        | 21,500            | 98.6                           | 0.2                     | 0.0               | 33.2       |
| Gibraltar *                    | 2000-2010       | 77                 | 18.2             | 0.0        | 0.0        | 63                | 0.0        | 1.6        | 62                | 100.0                          | 0.0                     | 0.0               | 51.6       |
| Greece (National Paediatric) † | -               | -                  | -                | -          | -          | -                 | -          | -          | -                 | -                              | -                       | -                 | -          |
| Iceland *                      | 2000-2014       | 3,132              | 0.0              | 0.0        | 0.1        | 3,130             | 1.5        | 0.0        | 3,083             | 98.8                           | 2.3                     | 0.0               | 0.0        |
| Ireland *                      | 2000-2013       | 38,329             | 0.0              | 0.9        | 0.0        | 37,983            | 1.1        | 0.0        | 37,536            | 93.3                           | 1.3                     | 0.0               | 0.0        |
| Italian registries             | 2000-2014       | 200,014            | 0.0              | 1.1        | 0.2        | 197,539           | 0.6        | 0.0        | 196,256           | 92.4                           | 8.1                     | 0.7               | 1.0        |
| Alto Adige                     | 2000-2010       | 3,860              | 0.0              | 0.0        | 0.0        | 3,859             | 1.1        | 0.0        | 3,814             | 96.5                           | 3.5                     | 0.0               | 0.0        |
| Barletta-Andria-Trani          | 2006-2012       | 1,188              | 0.0              | 0.0        | 0.1        | 1,187             | 1.7        | 0.0        | 1,167             | 91.3                           | 9.4                     | 1.2               | 0.0        |
| Basilicata                     | 2006-2010       | 1,683              | 0.0              | 0.0        | 0.1        | 1,682             | 0.0        | 0.0        | 1,682             | 86.7                           | 13.3                    | 0.3               | 0.4        |
| Bergamo                        | 2007-2012       | 4,373              | 0.0              | 0.0        | 0.0        | 4,372             | 0.0        | 0.0        | 4,371             | 97.8                           | 2.3                     | 0.4               | 0.0        |
| Biella-Vercelli                | 2000-2010       | 2,344              | 0.0              | 2.9        | 0.2        | 2,273             | 1.7        | 0.0        | 2,235             | 95.7                           | 4.4                     | 0.3               | 0.9        |
| Brescia                        | 2000-2008       | 6,814              | 0.0              | 0.0        | 0.0        | 6,813             | 0.0        | 0.2        | 6,802             | 86.8                           | 13.8                    | 0.6               | 0.0        |
| Brindisi                       | 2006-2008       | 556                | 0.0              | 0.0        | 0.0        | 556               | 0.0        | 0.0        | 556               | 88.7                           | 11.5                    | 0.4               | 1.4        |
| Caserta                        | 2008-2010       | 926                | 0.0              | 0.0        | 0.0        | 926               | 0.0        | 0.0        | 926               | 93.3                           | 6.8                     | 0.4               | 6.5        |
| Catania-Messina-Enna           | 2003-2012       | 8,425              | 0.0              | 0.0        | 0.0        | 8,424             | 1.4        | 0.0        | 8,305             | 94.1                           | 9.4                     | 0.0               | 1.4        |
| Catanzaro                      | 2003-2009       | 1,003              | 0.0              | 0.0        | 0.0        | 1,003             | 0.0        | 0.0        | 1,003             | 89.2                           | 11.0                    | 0.1               | 0.4        |
| Como                           | 2003-2011       | 3,504              | 0.0              | 0.0        | 0.0        | 3,504             | 0.0        | 0.0        | 3,503             | 94.2                           | 5.8                     | 0.9               | 0.0        |
| Cremona                        | 2005-2010       | 1,604              | 0.0              | 0.0        | 0.0        | 1,604             | 0.4        | 0.1        | 1,596             | 89.0                           | 11.0                    | 0.6               | 0.0        |
| Ferrara                        | 2000-2011       | 3,510              | 0.0              | 0.0        | 0.0        | 3,509             | 0.1        | 0.0        | 3,507             | 91.0                           | 9.1                     | 0.7               | 0.1        |
| Friuli-Venezia-Giulia          | 2000-2010       | 12,006             | 0.0              | 0.0        | 0.0        | 12,003            | 2.3        | 0.0        | 11,723            | 97.2                           | 2.9                     | 0.3               | 0.0        |
| Genoa                          | 2000-2009       | 7,354              | 0.0              | 1.7        | 1.4        | 7,126             | 0.1        | 0.0        | 7,119             | 88.9                           | 11.1                    | 0.0               | 0.0        |
| Latina                         | 2000-2011       | 2,575              | 0.0              | 0.0        | 0.0        | 2,574             | 0.0        | 0.0        | 2,573             | 84.5                           | 16.1                    | 1.8               | 1.7        |
| Lecce                          | 2003-2008       | 2,229              | 0.0              | 0.0        | 0.1        | 2,227             | 0.0        | 0.0        | 2,227             | 89.2                           | 11.4                    | 0.2               | 1.0        |

Web-table 2.12: Data quality indicators, men diagnosed during 2000-2014, by continent, country and registry: PROSTATE

|                      | Calendar period | Patients submitted | Ineligible (%) ¶ |         |       | Excluded (%) ¶¶   |      |       | Patients included | Data quality indicators (%) †† |                         |                   |          |
|----------------------|-----------------|--------------------|------------------|---------|-------|-------------------|------|-------|-------------------|--------------------------------|-------------------------|-------------------|----------|
|                      |                 |                    | Incomplete dates | In situ | Other | Eligible patients | DCO  | Other |                   | MV                             | Non-specific morphology | Lost to follow-up | Censored |
| Mantova              | 2000-2010       | 2,823              | 0.0              | 0.0     | 0.0   | 2,823             | 0.6  | 0.1   | 2,802             | 95.5                           | 4.9                     | 0.0               | 0.0      |
| Milano               | 2000-2012       | 16,201             | 0.0              | 0.0     | 0.0   | 16,198            | 0.1  | 0.0   | 16,182            | 92.7                           | 7.6                     | 3.5               | 0.2      |
| Modena               | 2000-2012       | 7,046              | 0.0              | 3.2     | 0.2   | 6,804             | 0.0  | 0.0   | 6,801             | 96.3                           | 3.8                     | 0.0               | 0.7      |
| Monza-Brianza        | 2007-2012       | 2,916              | 0.0              | 0.0     | 0.0   | 2,916             | 0.0  | 0.0   | 2,916             | 94.8                           | 6.2                     | 0.6               | 0.0      |
| Naples               | 2000-2012       | 3,190              | 0.0              | 0.0     | 0.0   | 3,190             | 0.0  | 0.0   | 3,189             | 92.9                           | 7.2                     | 1.0               | 2.5      |
| Nuoro                | 2003-2012       | 1,000              | 0.0              | 0.0     | 0.0   | 1,000             | 2.3  | 0.0   | 977               | 78.8                           | 22.2                    | 0.0               | 0.0      |
| Palermo              | 2003-2012       | 5,245              | 0.0              | 0.0     | 0.0   | 5,243             | 3.2  | 0.0   | 5,072             | 88.8                           | 11.7                    | 0.1               | 0.0      |
| Parma                | 2000-2014       | 4,565              | 0.0              | 0.1     | 0.1   | 4,558             | 0.4  | 0.1   | 4,538             | 94.6                           | 5.5                     | 0.9               | 0.2      |
| Pavia                | 2003-2009       | 2,447              | 0.0              | 0.0     | 0.0   | 2,446             | 0.0  | 0.0   | 2,446             | 84.0                           | 16.1                    | 0.7               | 0.5      |
| Piacenza             | 2006-2011       | 1,315              | 0.0              | 0.0     | 0.0   | 1,315             | 0.0  | 0.0   | 1,315             | 90.2                           | 11.6                    | 0.2               | 3.5      |
| Ragusa               | 2000-2012       | 2,485              | 0.0              | 0.9     | 4.2   | 2,357             | 1.7  | 0.0   | 2,317             | 87.2                           | 13.9                    | 0.3               | 0.0      |
| Reggio Emilia        | 2000-2012       | 4,022              | 0.0              | 0.0     | 0.0   | 4,022             | 0.0  | 0.0   | 4,021             | 92.6                           | 7.6                     | 0.8               | 0.0      |
| Romagna              | 2000-2012       | 13,304             | 0.0              | 8.1     | 0.1   | 12,225            | 0.0  | 0.0   | 12,221            | 88.8                           | 11.3                    | 0.1               | 0.0      |
| Salerno              | 2000-2009       | 4,056              | 0.0              | 0.0     | 0.0   | 4,056             | 0.0  | 0.1   | 4,052             | 87.1                           | 13.0                    | 0.3               | 3.2      |
| Sassari              | 2000-2011       | 2,674              | 0.0              | 0.0     | 0.1   | 2,671             | 3.1  | 0.0   | 2,586             | 90.4                           | 11.3                    | 0.0               | 0.0      |
| Siracusa             | 2000-2012       | 2,155              | 0.0              | 0.0     | 0.0   | 2,154             | 2.9  | 0.1   | 2,090             | 89.3                           | 11.8                    | 0.0               | 1.3      |
| Sondrio              | 2000-2011       | 1,663              | 0.0              | 0.0     | 0.0   | 1,663             | 0.0  | 0.0   | 1,663             | 94.6                           | 5.8                     | 0.3               | 0.2      |
| Taranto              | 2006-2012       | 1,877              | 0.0              | 0.0     | 0.0   | 1,877             | 2.0  | 0.0   | 1,840             | 94.2                           | 6.7                     | 1.7               | 0.1      |
| Trapani              | 2002-2010       | 1,457              | 0.0              | 0.0     | 0.0   | 1,457             | 0.5  | 0.1   | 1,447             | 90.4                           | 12.3                    | 0.6               | 1.0      |
| Trento               | 2000-2010       | 2,789              | 0.0              | 0.0     | 0.0   | 2,789             | 0.1  | 0.0   | 2,784             | 95.4                           | 6.1                     | 0.7               | 0.0      |
| Turin                | 2000-2012       | 9,621              | 0.0              | 5.0     | 0.1   | 9,137             | 1.2  | 0.0   | 9,024             | 96.6                           | 4.1                     | 2.1               | 0.0      |
| Tuscany              | 2000-2009       | 7,957              | 0.0              | 1.9     | 0.8   | 7,746             | 0.7  | 0.1   | 7,683             | 89.7                           | 10.7                    | 0.0               | 3.3      |
| Umbria               | 2000-2013       | 9,102              | 0.0              | 0.0     | 0.0   | 9,101             | 0.1  | 0.0   | 9,089             | 94.5                           | 5.7                     | 0.2               | 0.2      |
| Varese               | 2000-2012       | 8,953              | 0.0              | 0.0     | 0.0   | 8,952             | 0.0  | 0.1   | 8,943             | 94.0                           | 6.0                     | 0.8               | 0.1      |
| Veneto               | 2000-2009       | 16,102             | 0.0              | 0.0     | 0.0   | 16,102            | 0.1  | 0.0   | 16,072            | 93.8                           | 6.4                     | 0.5               | 2.8      |
| Viterbo              | 2006-2010       | 1,095              | 0.0              | 0.0     | 0.0   | 1,095             | 1.6  | 0.1   | 1,077             | 84.8                           | 15.3                    | 0.4               | 41.5     |
| Piedmont Childhood   | -               | -                  | -                | -       | -     | -                 | -    | -     | -                 | -                              | -                       | -                 | -        |
| Latvia *             | 2000-2014       | 13,151             | 0.0              | 0.1     | 18.2  | 10,741            | 0.0  | 0.6   | 10,674            | 100.0                          | 0.6                     | 0.0               | 0.0      |
| Lithuania *          | 2000-2012       | 30,954             | 0.0              | 0.0     | 0.0   | 30,947            | 2.5  | 0.0   | 30,156            | 94.6                           | 0.0                     | 0.0               | 0.2      |
| Malta *              | 2000-2013       | 2,130              | 0.0              | 0.2     | 0.0   | 2,125             | 2.4  | 0.2   | 2,069             | 94.3                           | 7.2                     | 0.0               | 0.0      |
| Netherlands *        | 2000-2014       | 144,281            | 0.0              | 0.5     | 0.0   | 143,489           | 0.4  | 0.2   | 142,578           | 97.5                           | 2.5                     | 0.6               | 0.0      |
| Norway *             | 2000-2014       | 63,249             | 0.0              | 1.0     | 7.3   | 57,974            | 0.5  | 0.0   | 57,657            | 99.9                           | 0.1                     | 0.2               | 0.0      |
| Poland *             | 2000-2014       | 134,755            | 0.0              | 0.0     | 0.0   | 134,743           | 2.3  | 0.4   | 131,099           | 94.3                           | 0.2                     | 0.0               | 0.0      |
| Greater Poland       | 2000-2014       | 12,643             | 0.0              | 0.0     | 0.0   | 12,643            | 4.6  | 0.4   | 12,004            | 97.5                           | 0.1                     | 0.0               | 0.0      |
| Holy Cross           | 2000-2014       | 5,322              | 0.0              | 0.0     | 0.0   | 5,322             | 2.0  | 0.3   | 5,200             | 94.2                           | 0.3                     | 0.0               | 0.0      |
| Kujavia-Pomerania    | 2000-2014       | 7,028              | 0.0              | 0.0     | 0.0   | 7,028             | 0.7  | 0.4   | 6,951             | 98.3                           | 0.0                     | 0.0               | 0.0      |
| Lesser Poland        | 2000-2014       | 11,903             | 0.0              | 0.0     | 0.1   | 11,897            | 3.1  | 0.3   | 11,487            | 95.3                           | 0.8                     | 0.0               | 0.0      |
| Łódź                 | 2000-2014       | 7,653              | 0.0              | 0.0     | 0.0   | 7,653             | 0.8  | 1.9   | 7,446             | 88.0                           | 1.2                     | 0.0               | 0.0      |
| Lower Silesia        | 2000-2014       | 9,309              | 0.0              | 0.0     | 0.0   | 9,308             | 0.6  | 0.0   | 9,248             | 84.8                           | 0.2                     | 0.3               | 0.0      |
| Lublin               | 2000-2014       | 8,043              | 0.0              | 0.0     | 0.0   | 8,043             | 4.9  | 0.2   | 7,628             | 92.4                           | 0.0                     | 0.0               | 0.0      |
| Lubush               | 2000-2014       | 3,114              | 0.0              | 0.0     | 0.0   | 3,114             | 1.8  | 0.1   | 3,056             | 97.3                           | 0.1                     | 0.0               | 0.0      |
| Mazovia              | 2000-2014       | 18,435             | 0.0              | 0.0     | 0.0   | 18,434            | 0.0  | 0.1   | 18,407            | 94.6                           | 0.0                     | 0.0               | 0.0      |
| Opole                | 2000-2014       | 3,070              | 0.0              | 0.0     | 0.0   | 3,070             | 0.0  | 0.3   | 3,061             | 98.6                           | 0.0                     | 0.0               | 0.0      |
| Podlaha              | 2000-2014       | 4,294              | 0.0              | 0.0     | 0.0   | 4,294             | 5.9  | 1.4   | 3,981             | 93.9                           | 0.0                     | 0.0               | 0.0      |
| Pomerania            | 2000-2014       | 9,971              | 0.0              | 0.0     | 0.0   | 9,971             | 5.3  | 0.7   | 9,379             | 98.5                           | 0.0                     | 0.0               | 0.0      |
| Silesia              | 2000-2014       | 17,171             | 0.0              | 0.0     | 0.0   | 17,170            | 0.6  | 0.2   | 17,032            | 93.8                           | 0.1                     | 0.0               | 0.0      |
| Subcarpathia         | 2000-2014       | 7,869              | 0.0              | 0.0     | 0.0   | 7,869             | 2.7  | 1.1   | 7,572             | 98.6                           | 0.1                     | 0.0               | 0.0      |
| Varmia-Mazuria       | 2000-2014       | 4,060              | 0.0              | 0.0     | 0.1   | 4,057             | 0.4  | 0.2   | 4,035             | 98.3                           | 0.3                     | 0.0               | 0.2      |
| West Pomerania       | 2000-2014       | 4,870              | 0.0              | 0.0     | 0.0   | 4,870             | 4.9  | 0.3   | 4,612             | 87.9                           | 0.0                     | 0.0               | 0.0      |
| Portugal *           | 2000-2014       | 66,072             | 1.2              | 0.3     | 0.1   | 65,000            | 0.1  | 0.1   | 64,886            | 95.8                           | 1.4                     | 1.6               | 0.1      |
| Azores               | 2000-2014       | 1,738              | 0.0              | 0.0     | 0.0   | 1,738             | 4.7  | 0.0   | 1,657             | 96.6                           | 3.4                     | 0.8               | 1.5      |
| Portugal Central     | 2003-2010       | 8,724              | 0.1              | 0.0     | 0.0   | 8,713             | 0.0  | 0.0   | 8,713             | 97.2                           | 3.1                     | 0.7               | 0.0      |
| Portugal North       | 2000-2010       | 16,678             | 4.6              | 0.0     | 0.0   | 15,913            | 0.0  | 0.0   | 15,911            | 98.9                           | 1.7                     | 0.0               | 0.0      |
| Portugal South       | 2000-2014       | 38,932             | 0.0              | 0.5     | 0.2   | 38,636            | 0.0  | 0.1   | 38,605            | 94.2                           | 0.7                     | 2.5               | 0.0      |
| Romania (Cluj)       | 2006-2012       | 1,512              | 0.0              | 0.1     | 0.2   | 1,507             | 13.7 | 0.0   | 1,301             | 96.0                           | 4.2                     | 0.0               | 0.2      |
| Russian registries ‡ | 2000-2014       | 20,449             | 0.0              | 0.0     | 0.0   | 20,443            | 0.2  | 0.3   | 20,346            | 96.2                           | 1.3                     | 1.8               | 1.7      |
| Arkhangelsk          | 2000-2014       | 2,689              | 0.0              | 0.0     | 0.0   | 2,689             | 0.3  | 0.5   | 2,669             | 94.8                           | 1.5                     | 0.8               | 0.0      |
| Karelia              | 2000-2014       | 1,470              | 0.0              | 0.1     | 0.1   | 1,467             | 0.9  | 0.2   | 1,451             | 90.8                           | 5.2                     | 0.7               | 5.7      |
| Omsk                 | 2000-2014       | 3,843              | 0.0              | 0.0     | 0.0   | 3,843             | 0.0  | 0.1   | 3,839             | 99.7                           | 0.9                     | 3.4               | 5.4      |
| Samara               | 2000-2014       | 10,404             | 0.0              | 0.0     | 0.0   | 10,404            | 0.2  | 0.1   | 10,367            | 96.8                           | 1.1                     | 1.6               | 0.0      |
| Tomsk                | 2005-2014       | 2,043              | 0.0              | 0.1     | 0.0   | 2,040             | 0.0  | 1.0   | 2,020             | 92.3                           | 0.0                     | 2.1               | 2.4      |
| Slovakia *           | 2000-2010       | 15,378             | 0.0              | 0.3     | 0.0   | 15,333            | 6.2  | 0.0   | 14,376            | 98.1                           | 2.6                     | 0.0               | 0.0      |
| Slovenia *           | 2000-2013       | 15,270             | 0.0              | 0.0     | 0.0   | 15,265            | 2.2  | 0.0   | 14,932            | 93.5                           | 0.0                     | 0.0               | 0.0      |
| Spanish registries   | 2000-2013       | 65,866             | 0.4              | 1.7     | 0.0   | 64,483            | 1.8  | 0.1   | 63,237            | 92.0                           | 2.0                     | 0.6               | 0.0      |
| Basque Country       | 2000-2013       | 22,596             | 0.0              | 1.6     | 0.0   | 22,220            | 1.4  | 0.3   | 21,857            | 91.5                           | 0.1                     | 0.6               | 0.0      |
| Canaries             | 2000-2011       | 9,714              | 0.0              | 2.0     | 0.0   | 9,519             | 2.2  | 0.0   | 9,312             | 93.5                           | 0.2                     | 0.1               | 0.0      |
| Girona               | 2000-2013       | 6,325              | 1.9              | 2.8     | 0.2   | 6,008             | 2.3  | 0.0   | 5,872             | 92.0                           | 8.4                     | 0.8               | 0.0      |
| Granada              | 2000-2012       | 4,912              | 0.0              | 0.0     | 0.0   | 4,912             | 2.3  | 0.0   | 4,800             | 88.4                           | 0.1                     | 0.3               | 0.0      |
| Mallorca             | 2000-2012       | 5,622              | 1.2              | 0.6     | 0.0   | 5,517             | 1.6  | 0.1   | 5,426             | 94.6                           | 1.1                     | 2.7               | 0.0      |
| Murcia               | 2000-2010       | 6,984              | 0.0              | 0.0     | 0.0   | 6,984             | 1.9  | 0.1   | 6,843             | 92.1                           | 9.1                     | 0.0               | 0.0      |
| Navarra              | 2000-2010       | 4,261              | 0.0              | 2.7     | 0.0   | 4,144             | 2.0  | 0.0   | 4,063             | 90.3                           | 0.1                     | 0.1               | 0.0      |
| Tarragona            | 2000-2011       | 5,452              | 1.1              | 3.8     | 0.1   | 5,179             | 2.2  | 0.0   | 5,064             | 93.7                           | 0.6                     | 0.0               | 0.0      |
| Spain Childhood      | -               | -                  | -                | -       | -     | -                 | -    | -     | -                 | -                              | -                       | -                 | -        |
| Valencia Childhood   | -               | -                  | -                | -       | -     | -                 | -    | -     | -                 | -                              | -                       | -                 | -        |
| Sweden *             | 2000-2014       | 143,232            | 0.0              | 1.2     | 1.2   | 139,833           | 0.5  | 0.0   | 139,051           | 99.2                           | 0.8                     | 0.2               | 0.0      |
| Swiss registries     | 2000-2014       | 41,425             | 0.0              | 0.6     | 0.1   | 41,128            | 1.1  | 0.3   | 40,528            | 95.7                           | 2.5                     | 6.2               | 4.4      |
| Basel                | 2000-2011       | 2,891              | 0.0              | 0.0     | 0.3   | 2,882             | 0.2  | 4.3   | 2,750             | 100.0                          | 0.0                     | 0.9               | 13.3     |
| Fribourg             | 2006-2014       | 1,978              | 0.0              | 4.7     | 0.1   | 1,884             | 0.0  | 0.1   | 1,882             | 98.4                           | 1.7                     | 2.3               | 0.0      |
| Geneva               | 2000-2013       | 4,288              | 0.0              | 1.4     | 0.0   | 4,228             | 1.3  | 0.0   | 4,171             | 94.7                           | 5.3                     | 7.8               | 0.0      |
| Graubünden-Glarus    | 2000-2014       | 3,075              | 0.0              | 0.0     | 0.1   | 3,073             | 0.2  | 0.0   | 3,068             | 94.8                           | 0.0                     | 51.4              | 0.0      |
| Neuchâtel            | 2000-2014       | 1,849              | 0.0              | 1.7     | 0.9   | 1,801             | 1.5  | 0.0   | 1,774             | 91.7                           | 0.8                     | 3.2               | 4.0      |
| St Gallen-Appenzell  | 2000-2014       | 6,051              | 0.0              | 0.0     | 0.0   | 6,051             | 0.2  | 0.0   | 6,040             | 96.4                           | 0.0                     | 2.8               | 0.0      |
| Ticino               | 2000-2014       | 3,225              | 0.0              | 0.0     | 0.1   | 3,223             | 1.8  | 0.0   | 3,166             | 98.8                           | 1.3                     | 2.5               | 0.0      |
| Valais               | 2000-2014       | 3,789              | 0.0              | 2.1     | 0.0   | 3,708             | 0.7  | 0.0   | 3,681             | 93.2                           | 0.0                     | 1.5               | 0.0      |

Web-table 2.12: Data quality indicators, men diagnosed during 2000-2014, by continent, country and registry: PROSTATE

|                              | Calendar period | Patients submitted | Ineligible (%) ¶ |            |            | Eligible patients | Excluded (%) ¶¶ |            | Patients included | Data quality indicators (%) †† |                         |                   |            |
|------------------------------|-----------------|--------------------|------------------|------------|------------|-------------------|-----------------|------------|-------------------|--------------------------------|-------------------------|-------------------|------------|
|                              |                 |                    | Incomplete dates | In situ    | Other      |                   | DCO             | Other      |                   | MV                             | Non-specific morphology | Lost to follow-up | Censored   |
| Zürich                       | 2000-2013       | 14,279             | 0.0              | 0.0        | 0.0        | 14,278            | 2.0             | 0.0        | 13,996            | 95.1                           | 4.9                     | 1.4               | 9.7        |
| Switzerland (Childhood) †    | -               | -                  |                  |            |            |                   |                 |            |                   |                                |                         |                   |            |
| United Kingdom *             | 2000-2014       | 600,717            | 0.3              | 2.0        | 0.1        | 586,738           | 1.3             | 0.1        | 578,118           | 94.7                           | 4.4                     | 2.4               | 0.0        |
| England                      | 2000-2014       | 508,401            | 0.3              | 2.0        | 0.0        | 496,341           | 1.4             | 0.1        | 488,461           | 95.8                           | 4.4                     | 2.8               | 0.0        |
| Northern Ireland             | 2000-2014       | 13,941             | 0.0              | 2.2        | 0.5        | 13,568            | 0.4             | 0.0        | 13,519            | 86.5                           | 13.7                    | 0.0               | 0.0        |
| Scotland                     | 2000-2014       | 43,455             | 0.0              | 2.3        | 0.0        | 42,454            | 0.3             | 0.0        | 42,316            | 83.5                           | 0.3                     | 0.2               | 0.0        |
| Wales                        | 2000-2014       | 34,920             | 0.0              | 1.2        | 0.4        | 34,375            | 1.6             | 0.1        | 33,822            | 95.9                           | 5.5                     | 0.0               | 0.0        |
| <b>OCEANIA</b>               |                 | <b>298,244</b>     | <b>0.3</b>       | <b>1.1</b> | <b>0.1</b> | <b>294,000</b>    | <b>1.2</b>      | <b>0.1</b> | <b>290,176</b>    | <b>97.4</b>                    | <b>2.9</b>              | <b>0.0</b>        | <b>0.0</b> |
| Australia *                  | 2000-2014       | 253,894            | 0.4              | 1.2        | 0.1        | 249,650           | 1.0             | 0.1        | 247,000           | 97.9                           | 2.3                     | 0.0               | 0.0        |
| Australian Capital Territory | 2000-2013       | 3,266              | 0.0              | 0.2        | 1.3        | 3,219             | 0.9             | 0.0        | 3,190             | 99.1                           | 1.0                     | 0.0               | 0.2        |
| New South Wales              | 2000-2012       | 76,889             | 0.2              | 0.0        | 0.0        | 76,725            | 0.8             | 0.1        | 76,030            | 99.0                           | 1.3                     | 0.0               | 0.0        |
| Northern Territory           | 2000-2013       | 995                | 0.0              | 0.0        | 0.0        | 995               | 0.2             | 0.0        | 993               | 97.5                           | 0.2                     | 0.0               | 0.0        |
| Queensland                   | 2000-2014       | 56,088             | 1.4              | 3.5        | 0.2        | 53,219            | 0.8             | 0.0        | 52,791            | 98.1                           | 2.6                     | 0.0               | 0.0        |
| South Australia              | 2000-2013       | 20,363             | 0.0              | 0.0        | 0.0        | 20,354            | 0.1             | 0.1        | 20,326            | 97.1                           | 1.6                     | 0.0               | 0.0        |
| Tasmania                     | 2000-2013       | 6,766              | 0.0              | 1.1        | 0.1        | 6,683             | 0.8             | 0.1        | 6,628             | 98.7                           | 3.1                     | 0.0               | 0.0        |
| Victoria                     | 2000-2014       | 64,414             | 0.0              | 1.7        | 0.0        | 63,345            | 2.0             | 0.0        | 62,028            | 96.5                           | 3.6                     | 0.0               | 0.0        |
| Western Australia            | 2000-2014       | 25,113             | 0.0              | 0.0        | 0.0        | 25,110            | 0.3             | 0.1        | 25,014            | 97.8                           | 2.2                     | 0.0               | 0.0        |
| New Zealand *                | 2000-2014       | 44,350             | 0.0              | 0.0        | 0.0        | 44,350            | 2.6             | 0.0        | 43,176            | 94.3                           | 5.9                     | 0.0               | 0.0        |
| <b>Total</b>                 |                 | <b>6,069,870</b>   | <b>0.6</b>       | <b>0.6</b> | <b>0.2</b> | <b>5,987,450</b>  | <b>1.9</b>      | <b>0.2</b> | <b>5,864,878</b>  | <b>97.4</b>                    | <b>2.4</b>              | <b>1.4</b>        | <b>1.5</b> |

Web-table 2.13: Data quality indicators, patients diagnosed during 2000-2014, by continent, country and registry: BRAIN (ADULTS)

|                                    | Calendar period | Patients submitted | Ineligible (%) ¶ |            |            | Excluded (%) ¶¶   |             |            | Data quality indicators (%) †† |             |                         |                   |             |
|------------------------------------|-----------------|--------------------|------------------|------------|------------|-------------------|-------------|------------|--------------------------------|-------------|-------------------------|-------------------|-------------|
|                                    |                 |                    | Incomplete dates | In situ    | Other      | Eligible patients | DCO         | Other      | Patients included              | MV          | Non-specific morphology | Lost to follow-up | Censored    |
| <b>AFRICA</b>                      |                 | <b>988</b>         | <b>26.2</b>      | <b>0.0</b> | <b>0.9</b> | <b>720</b>        | <b>10.3</b> | <b>7.5</b> | <b>592</b>                     | <b>81.8</b> | <b>50.3</b>             | <b>0.3</b>        | <b>21.6</b> |
| Algerian registries                | 2000-2014       | <b>632</b>         | 22.6             | 0.0        | 1.3        | <b>481</b>        | 12.5        | 6.0        | <b>392</b>                     | 93.9        | 52.3                    | 0.0               | 3.1         |
| Annaba                             | 2000-2000       | <b>14</b>          | 21.4             | 0.0        | 0.0        | <b>11</b>         | 27.3        | 9.1        | <b>7</b>                       | 28.6        | 0.0                     | 0.0               | 100.0       |
| Sétif                              | 2000-2013       | <b>280</b>         | 50.0             | 0.0        | 0.7        | <b>138</b>        | 0.0         | 9.4        | <b>125</b>                     | 84.8        | 45.6                    | 0.0               | 4.0         |
| Tlemcen                            | 2006-2014       | <b>338</b>         | 0.0              | 0.0        | 1.8        | <b>332</b>        | 17.2        | 4.5        | <b>260</b>                     | 100.0       | 56.9                    | 0.0               | 0.0         |
| Mali (Bamako)                      | -               |                    |                  |            |            |                   |             |            |                                |             |                         |                   |             |
| Mauritius *                        | 2010-2012       | <b>46</b>          | 0.0              | 0.0        | 0.0        | <b>46</b>         | 0.0         | 21.7       | <b>36</b>                      | 77.8        | 27.8                    | 0.0               | 0.0         |
| Morocco (Casablanca)               | -               |                    |                  |            |            |                   |             |            |                                |             |                         |                   |             |
| Nigeria (Ibadan)                   | 2005-2014       | <b>293</b>         | 39.6             | 0.0        | 0.0        | <b>177</b>        | 7.9         | 8.5        | <b>148</b>                     | 53.4        | 51.4                    | 0.0               | 72.3        |
| South Africa (Eastern Cape)        | 2002-2014       | <b>17</b>          | 0.0              | 0.0        | 5.9        | <b>16</b>         | 0.0         | 0.0        | <b>16</b>                      | 56.3        | 43.8                    | 12.5              | 56.3        |
| <b>AMERICA (Central and South)</b> |                 | <b>11,280</b>      | <b>2.2</b>       | <b>0.0</b> | <b>2.3</b> | <b>10,769</b>     | <b>14.8</b> | <b>5.8</b> | <b>8,547</b>                   | <b>83.9</b> | <b>17.5</b>             | <b>0.2</b>        | <b>4.7</b>  |
| Argentinian registries             | 2002-2013       | <b>1,918</b>       | 1.1              | 0.0        | 1.1        | <b>1,875</b>      | 22.0        | 13.1       | <b>1,217</b>                   | 85.2        | 17.9                    | 0.0               | 0.0         |
| Chubut                             | 2008-2013       | <b>80</b>          | 27.5             | 0.0        | 2.5        | <b>56</b>         | 16.1        | 7.1        | <b>43</b>                      | 62.8        | 41.9                    | 0.0               | 0.0         |
| Córdoba                            | 2004-2013       | <b>832</b>         | 0.0              | 0.0        | 2.0        | <b>815</b>        | 14.8        | 16.3       | <b>561</b>                     | 85.9        | 26.4                    | 0.0               | 0.0         |
| Mendoza                            | 2003-2013       | <b>1,006</b>       | 0.0              | 0.0        | 0.2        | <b>1,004</b>      | 28.2        | 10.8       | <b>613</b>                     | 86.1        | 8.5                     | 0.0               | 0.0         |
| Tierra del Fuego                   | -               |                    |                  |            |            |                   |             |            |                                |             |                         |                   |             |
| Argentina (Childhood) †            | -               |                    |                  |            |            |                   |             |            |                                |             |                         |                   |             |
| Brazilian registries               | 2000-2014       | <b>1,488</b>       | 0.2              | 0.0        | 1.1        | <b>1,469</b>      | 27.4        | 3.8        | <b>1,011</b>                   | 89.0        | 12.5                    | 0.0               | 0.3         |
| Aracaju                            | 2000-2012       | <b>245</b>         | 0.8              | 0.0        | 0.0        | <b>243</b>        | 28.8        | 0.4        | <b>172</b>                     | 84.3        | 15.7                    | 0.0               | 0.0         |
| Cuiabá                             | -               |                    |                  |            |            |                   |             |            |                                |             |                         |                   |             |
| Curitiba                           | 2000-2012       | <b>1,163</b>       | 0.0              | 0.0        | 1.4        | <b>1,147</b>      | 28.4        | 4.8        | <b>766</b>                     | 92.4        | 9.1                     | 0.0               | 0.0         |
| Goiânia                            | -               |                    |                  |            |            |                   |             |            |                                |             |                         |                   |             |
| Jaú                                | 2000-2014       | <b>80</b>          | 1.3              | 0.0        | 0.0        | <b>79</b>         | 7.6         | 0.0        | <b>73</b>                      | 64.4        | 39.7                    | 0.0               | 4.1         |
| São Paulo                          | -               |                    |                  |            |            |                   |             |            |                                |             |                         |                   |             |
| Chilean registries                 | 2000-2012       | <b>600</b>         | 0.0              | 0.0        | 1.3        | <b>592</b>        | 17.1        | 2.7        | <b>475</b>                     | 59.6        | 28.4                    | 0.0               | 6.5         |
| Antofagasta                        | 2003-2010       | <b>75</b>          | 0.0              | 0.0        | 2.7        | <b>73</b>         | 28.8        | 0.0        | <b>52</b>                      | 63.5        | 40.4                    | 0.0               | 7.7         |
| Biobio                             | 2003-2012       | <b>146</b>         | 0.0              | 0.0        | 2.1        | <b>143</b>        | 5.6         | 2.1        | <b>132</b>                     | 50.8        | 49.2                    | 0.0               | 3.8         |
| Concepción                         | 2006-2010       | <b>220</b>         | 0.0              | 0.0        | 1.4        | <b>217</b>        | 21.7        | 2.8        | <b>164</b>                     | 70.7        | 29.3                    | 0.0               | 8.5         |
| Los Rios                           | 2000-2012       | <b>159</b>         | 0.0              | 0.0        | 0.0        | <b>159</b>        | 15.7        | 4.4        | <b>127</b>                     | 52.8        | 0.8                     | 0.0               | 6.3         |
| Colombian registries               | 2000-2014       | <b>1,976</b>       | 2.3              | 0.0        | 2.4        | <b>1,884</b>      | 7.6         | 7.4        | <b>1,601</b>                   | 76.6        | 26.5                    | 0.0               | 20.5        |
| Bucaramanga                        | -               |                    |                  |            |            |                   |             |            |                                |             |                         |                   |             |
| Cali                               | 2000-2014       | <b>1,711</b>       | 0.8              | 0.0        | 2.4        | <b>1,656</b>      | 7.2         | 8.2        | <b>1,402</b>                   | 75.2        | 27.5                    | 0.0               | 22.0        |
| Manizales                          | 2003-2012       | <b>89</b>          | 23.6             | 0.0        | 0.0        | <b>68</b>         | 2.9         | 4.4        | <b>63</b>                      | 87.3        | 19.0                    | 0.0               | 28.6        |
| Pasto                              | 2000-2012       | <b>176</b>         | 5.7              | 0.0        | 3.4        | <b>160</b>        | 13.8        | 1.3        | <b>136</b>                     | 86.0        | 19.9                    | 0.0               | 0.7         |
| Costa Rica *                       | 2002-2014       | <b>1,411</b>       | 0.0              | 0.0        | 6.9        | <b>1,314</b>      | 14.8        | 4.0        | <b>1,067</b>                   | 84.4        | 18.3                    | 0.0               | 0.0         |
| Cuba *                             | -               |                    |                  |            |            |                   |             |            |                                |             |                         |                   |             |
| Ecuadorian registries              | 2000-2013       | <b>1,767</b>       | 7.0              | 0.0        | 0.5        | <b>1,634</b>      | 7.9         | 1.5        | <b>1,481</b>                   | 84.4        | 16.8                    | 0.1               | 2.0         |
| Cuenca                             | 2000-2012       | <b>153</b>         | 44.4             | 0.0        | 0.7        | <b>84</b>         | 9.5         | 6.0        | <b>71</b>                      | 73.2        | 28.2                    | 0.0               | 28.2        |
| Guayaquil                          | 2005-2013       | <b>540</b>         | 0.2              | 0.0        | 0.9        | <b>534</b>        | 6.6         | 3.6        | <b>480</b>                     | 80.8        | 20.6                    | 0.0               | 0.0         |
| Loja                               | 2000-2013       | <b>113</b>         | 0.0              | 0.0        | 0.9        | <b>112</b>        | 4.5         | 0.0        | <b>107</b>                     | 65.4        | 34.6                    | 0.9               | 0.0         |
| Manabí                             | 2000-2013       | <b>173</b>         | 3.5              | 0.0        | 0.6        | <b>166</b>        | 16.3        | 0.0        | <b>139</b>                     | 81.3        | 18.7                    | 0.0               | 0.0         |
| Quito                              | 2000-2013       | <b>788</b>         | 6.2              | 0.0        | 0.1        | <b>738</b>        | 7.3         | 0.0        | <b>684</b>                     | 91.7        | 9.8                     | 0.0               | 1.5         |
| Guadeloupe *                       | 2008-2013       | <b>56</b>          | 0.0              | 0.0        | 0.0        | <b>56</b>         | 0.0         | 1.8        | <b>55</b>                      | 100.0       | 0.0                     | 0.0               | 10.9        |
| Martinique *                       | 2000-2012       | <b>186</b>         | 0.0              | 0.0        | 0.0        | <b>186</b>        | 0.0         | 2.2        | <b>182</b>                     | 78.6        | 2.2                     | 7.1               | 0.0         |
| Mexico (Childhood) †               | -               |                    |                  |            |            |                   |             |            |                                |             |                         |                   |             |
| Peru (Lima)                        | -               |                    |                  |            |            |                   |             |            |                                |             |                         |                   |             |
| Puerto Rico *                      | 2000-2011       | <b>1,878</b>       | 3.1              | 0.0        | 3.2        | <b>1,759</b>      | 12.0        | 5.1        | <b>1,458</b>                   | 94.5        | 10.0                    | 0.0               | 0.0         |
| Uruguay *                          | -               |                    |                  |            |            |                   |             |            |                                |             |                         |                   |             |
| <b>AMERICA (North)</b>             |                 | <b>282,927</b>     | <b>0.6</b>       | <b>0.0</b> | <b>4.9</b> | <b>267,509</b>    | <b>3.1</b>  | <b>2.8</b> | <b>251,888</b>                 | <b>92.7</b> | <b>8.3</b>              | <b>0.9</b>        | <b>0.0</b>  |
| Canadian registries                | 2000-2014       | <b>31,078</b>      | 0.2              | 0.0        | 2.1        | <b>30,362</b>     | 1.7         | 5.5        | <b>28,186</b>                  | 79.1        | 20.7                    | 0.0               | 0.0         |
| Alberta                            | 2000-2014       | <b>3,238</b>       | 0.2              | 0.0        | 4.2        | <b>3,098</b>      | 0.7         | 1.2        | <b>3,040</b>                   | 95.6        | 4.7                     | 0.0               | 0.0         |
| British Columbia                   | 2000-2014       | <b>6,117</b>       | 0.6              | 0.0        | 4.4        | <b>5,809</b>      | 1.9         | 23.3       | <b>4,342</b>                   | 93.6        | 6.5                     | 0.0               | 0.0         |
| Manitoba                           | 2000-2014       | <b>1,281</b>       | 0.1              | 0.0        | 6.1        | <b>1,202</b>      | 1.7         | 0.7        | <b>1,172</b>                   | 89.5        | 11.1                    | 0.0               | 0.0         |
| New Brunswick                      | 2000-2014       | <b>909</b>         | 0.0              | 0.0        | 5.3        | <b>861</b>        | 0.5         | 0.6        | <b>852</b>                     | 76.2        | 0.1                     | 0.0               | 0.0         |
| Newfoundland & Labrador            | 2000-2014       | <b>658</b>         | 0.0              | 0.0        | 2.9        | <b>639</b>        | 3.0         | 2.2        | <b>606</b>                     | 92.7        | 8.1                     | 0.0               | 0.0         |
| Nova Scotia                        | 2000-2014       | <b>1,179</b>       | 0.3              | 0.0        | 5.0        | <b>1,116</b>      | 0.4         | 3.4        | <b>1,073</b>                   | 92.5        | 7.5                     | 0.0               | 0.0         |
| Ontario                            | 2000-2014       | <b>16,500</b>      | 0.0              | 0.0        | 0.0        | <b>16,500</b>     | 1.8         | 1.1        | <b>16,014</b>                  | 69.0        | 31.7                    | 0.0               | 0.0         |
| Prince Edward Island               | 2000-2014       | <b>153</b>         | 0.0              | 0.0        | 0.0        | <b>153</b>        | 2.0         | 5.9        | <b>141</b>                     | 88.7        | 11.3                    | 0.0               | 0.0         |
| Saskatchewan                       | 2000-2014       | <b>1,043</b>       | 0.2              | 0.0        | 5.5        | <b>984</b>        | 2.1         | 1.7        | <b>946</b>                     | 96.0        | 4.8                     | 0.0               | 0.0         |
| US registries                      | 2000-2014       | <b>251,849</b>     | 0.6              | 0.0        | 5.2        | <b>237,147</b>    | 3.3         | 2.4        | <b>223,702</b>                 | 94.4        | 6.7                     | 1.0               | 0.0         |
| Alabama                            | 2000-2014       | <b>4,806</b>       | 0.7              | 0.0        | 5.1        | <b>4,531</b>      | 3.1         | 1.8        | <b>4,308</b>                   | 94.2        | 7.0                     | 0.0               | 0.0         |
| Alaska                             | 2000-2013       | <b>580</b>         | 2.8              | 0.0        | 2.2        | <b>551</b>        | 2.0         | 2.2        | <b>528</b>                     | 95.1        | 7.8                     | 0.0               | 0.0         |
| Arkansas                           | 2000-2011       | <b>2,529</b>       | 0.2              | 0.0        | 4.3        | <b>2,415</b>      | 3.1         | 6.7        | <b>2,176</b>                   | 94.8        | 6.5                     | 0.0               | 0.0         |
| California                         | 2000-2011       | <b>26,074</b>      | 1.4              | 0.0        | 6.4        | <b>24,051</b>     | 1.6         | 1.8        | <b>23,241</b>                  | 94.5        | 6.2                     | 0.0               | 0.0         |
| Greater Bay Area                   | 2000-2014       | <b>6,562</b>       | 0.9              | 0.0        | 7.1        | <b>6,038</b>      | 2.2         | 1.4        | <b>5,822</b>                   | 96.1        | 4.2                     | 4.8               | 0.0         |
| Greater California                 | 2000-2014       | <b>19,378</b>      | 1.4              | 0.0        | 5.7        | <b>18,000</b>     | 1.4         | 2.1        | <b>17,368</b>                  | 93.6        | 7.1                     | 5.1               | 0.0         |
| Los Angeles                        | 2000-2014       | <b>7,637</b>       | 1.2              | 0.0        | 7.3        | <b>6,984</b>      | 2.2         | 2.0        | <b>6,692</b>                   | 95.0        | 5.6                     | 9.0               | 0.1         |
| Colorado                           | 2000-2013       | <b>4,456</b>       | 0.2              | 0.0        | 4.1        | <b>4,266</b>      | 5.0         | 1.3        | <b>3,997</b>                   | 95.4        | 5.1                     | 0.0               | 0.0         |
| Connecticut                        | 2000-2014       | <b>4,050</b>       | 0.3              | 0.0        | 5.4        | <b>3,819</b>      | 2.0         | 1.4        | <b>3,689</b>                   | 96.3        | 5.1                     | 3.8               | 0.0         |
| Delaware                           | 2000-2014       | <b>908</b>         | 0.3              | 0.0        | 5.1        | <b>859</b>        | 3.3         | 1.6        | <b>817</b>                     | 95.8        | 4.7                     | 0.0               | 0.0         |
| Florida                            | 2000-2013       | <b>21,394</b>      | 0.1              | 0.0        | 5.0        | <b>20,304</b>     | 4.7         | 7.4        | <b>17,842</b>                  | 94.1        | 8.3                     | 0.0               | 0.0         |
| Georgia                            | 2000-2014       | <b>8,389</b>       | 0.0              | 0.0        | 4.4        | <b>8,015</b>      | 3.1         | 1.3        | <b>7,658</b>                   | 93.1        | 8.3                     | 0.0               | 0.0         |
| Atlanta                            | 2000-2014       | <b>2,571</b>       | 0.0              | 0.0        | 5.5        | <b>2,429</b>      | 2.3         | 1.6        | <b>2,333</b>                   | 94.0        | 7.6                     | 0.0               | 0.0         |
| Hawaii                             | 2000-2014       | <b>1,023</b>       | 0.8              | 0.0        | 8.0        | <b>933</b>        | 5.6         | 1.1        | <b>871</b>                     | 95.1        | 6.0                     | 3.2               | 0.0         |
| Idaho                              | 2000-2014       | <b>1,585</b>       | 0.5              | 0.0        | 4.5        | <b>1,505</b>      | 5.2         | 1.1        | <b>1,409</b>                   | 97.2        | 3.2                     | 0.0               | 0.0         |
| Indiana                            | 2000-2014       | <b>6,869</b>       | 0.3              | 0.0        | 4.7        | <b>6,523</b>      | 3.0         | 0.9        | <b>6,272</b>                   | 95.2        | 5.4                     | 0.0               | 0.0         |
| Iowa                               | 2000-2014       | <b>3,640</b>       | 0.3              | 0.0        | 5.1        | <b>3,443</b>      | 2.5         | 1.0        | <b>3,323</b>                   | 95.4        | 5.0                     | 1.4               | 0.0         |
| Kentucky                           | 2000-2014       | <b>4,859</b>       | 0.0              | 0.0        | 4.1        | <b>4,659</b>      | 2.2         | 0.6        | <b>4,526</b>                   | 94.1        | 6.3                     | 1.5               | 0.0         |
| Louisiana                          | 2000-2014       | <b>4,297</b>       | 1.1              | 0.0        | 5.9        | <b>3,996</b>      | 2.8         | 4.7        | <b>3,698</b>                   | 93.3        | 7.8                     | 3.1               | 0.1         |
| Maine                              | 2000-2013       | <b>1,592</b>       | 0.1              | 0.0        | 5.3        | <b>1,507</b>      | 3.5         | 1.3        | <b>1,434</b>                   | 95.9        | 4.5                     | 0.0               | 0.0         |
| Massachusetts                      | 2000-2009       | <b>4,905</b>       | 0.0              | 0.0        | 6.3        | <b>4,595</b>      | 2.9         | 1.3        | <b>4,402</b>                   | 95.2        | 5.0                     | 0.0               | 0.0         |
| Michigan                           | 2000-2013       | <b>10,415</b>      | 0.4              | 0.0        | 4.8        | <b>9,878</b>      | 2.0         | 2.7        | <b>9,413</b>                   | 93.2        | 7.7                     | 0.0               | 0.0         |

Web-table 2.13: Data quality indicators, patients diagnosed during 2000-2014, by continent, country and registry: BRAIN (ADULTS)

|                     | Calendar period | Patients submitted | Ineligible (%) ¶ |            |            | Excluded (%) ¶¶   |            |            | Patients included | Data quality indicators (%) †† |                         |                   |            |
|---------------------|-----------------|--------------------|------------------|------------|------------|-------------------|------------|------------|-------------------|--------------------------------|-------------------------|-------------------|------------|
|                     |                 |                    | Incomplete dates | In situ    | Other      | Eligible patients | DCO        | Other      |                   | MV                             | Non-specific morphology | Lost to follow-up | Censored   |
| Detroit             | 2000-2014       | 4,203              | 0.8              | 0.0        | 5.8        | 3,929             | 4.0        | 3.6        | 3,630             | 96.6                           | 4.2                     | 2.9               | 0.1        |
| Minnesota           | 2000-2013       | 4,887              | 0.0              | 0.0        | 5.6        | 4,611             | 5.9        | 1.1        | 4,291             | 99.8                           | 0.5                     | 0.0               | 0.0        |
| Mississippi         | 2002-2014       | 2,509              | 0.7              | 0.0        | 4.5        | 2,377             | 5.5        | 1.5        | 2,212             | 93.9                           | 6.8                     | 0.0               | 0.0        |
| Missouri            | -               | -                  | -                | -          | -          | -                 | -          | -          | -                 | -                              | -                       | -                 | -          |
| Montana             | 2000-2014       | 1,244              | 0.5              | 0.0        | 3.2        | 1,198             | 4.0        | 2.3        | 1,122             | 95.5                           | 5.3                     | 0.0               | 0.0        |
| Nebraska            | 2000-2014       | 1,993              | 0.4              | 0.0        | 4.7        | 1,893             | 2.3        | 2.0        | 1,812             | 96.0                           | 4.4                     | 0.0               | 0.0        |
| New Hampshire       | 2000-2014       | 1,548              | 0.0              | 0.0        | 3.7        | 1,491             | 2.3        | 1.5        | 1,433             | 97.0                           | 3.8                     | 0.0               | 0.0        |
| New Jersey          | 2000-2014       | 9,965              | 1.1              | 0.0        | 5.9        | 9,261             | 2.6        | 2.4        | 8,797             | 94.4                           | 6.7                     | 17.8              | 0.0        |
| New Mexico          | 2000-2014       | 1,898              | 0.0              | 0.0        | 5.0        | 1,803             | 5.6        | 7.1        | 1,574             | 93.5                           | 9.4                     | 4.4               | 0.2        |
| New York            | 2000-2014       | 21,300             | 1.8              | 0.0        | 6.7        | 19,485            | 2.0        | 1.0        | 18,906            | 93.9                           | 7.1                     | 0.0               | 0.0        |
| New York City       | 2000-2014       | 7,561              | 2.4              | 0.0        | 8.4        | 6,747             | 1.6        | 1.5        | 6,543             | 94.2                           | 7.1                     | 0.0               | 0.0        |
| North Carolina      | 2000-2014       | 9,540              | 0.0              | 0.0        | 4.6        | 9,100             | 3.5        | 2.3        | 8,575             | 96.0                           | 5.0                     | 0.0               | 0.0        |
| Ohio                | 2000-2014       | 13,104             | 0.1              | 0.0        | 4.6        | 12,498            | 4.8        | 3.7        | 11,426            | 95.7                           | 5.5                     | 0.0               | 0.0        |
| Oklahoma            | 2000-2010       | 2,841              | 0.5              | 0.0        | 4.6        | 2,697             | 3.6        | 1.1        | 2,569             | 90.9                           | 12.1                    | 0.0               | 0.0        |
| Oregon              | 2000-2013       | 4,166              | 0.0              | 0.0        | 3.9        | 4,002             | 2.2        | 1.6        | 3,850             | 96.3                           | 4.1                     | 0.0               | 0.0        |
| Pennsylvania        | 2000-2014       | 15,208             | 0.7              | 0.0        | 5.2        | 14,303            | 3.3        | 0.9        | 13,714            | 95.5                           | 5.3                     | 0.0               | 0.0        |
| Rhode Island        | 2000-2014       | 1,250              | 0.2              | 0.0        | 6.9        | 1,161             | 2.6        | 3.7        | 1,088             | 97.0                           | 3.8                     | 0.0               | 0.0        |
| South Carolina      | 2000-2014       | 4,920              | 0.0              | 0.0        | 4.8        | 4,683             | 4.3        | 3.4        | 4,321             | 91.4                           | 9.9                     | 0.0               | 0.0        |
| Tennessee           | 2000-2011       | 5,307              | 0.2              | 0.0        | 4.6        | 5,049             | 3.0        | 1.8        | 4,807             | 95.1                           | 5.9                     | 0.0               | 0.0        |
| Texas               | 2000-2013       | 21,405             | 1.1              | 0.0        | 4.9        | 20,122            | 5.0        | 1.8        | 18,761            | 91.0                           | 11.0                    | 0.0               | 0.0        |
| Utah                | 2000-2014       | 2,317              | 0.0              | 0.0        | 3.8        | 2,228             | 0.9        | 1.5        | 2,176             | 96.8                           | 3.5                     | 5.7               | 0.0        |
| Vermont             | 2000-2013       | 748                | 0.0              | 0.0        | 3.7        | 720               | 1.3        | 2.2        | 695               | 97.0                           | 3.6                     | 0.0               | 0.0        |
| Washington          | 2000-2008       | 4,171              | 1.0              | 0.0        | 4.3        | 3,951             | 1.9        | 0.5        | 3,856             | 95.6                           | 4.9                     | 0.0               | 0.0        |
| Seattle             | 2000-2014       | 5,547              | 0.7              | 0.0        | 4.4        | 5,266             | 1.0        | 0.7        | 5,177             | 95.3                           | 5.0                     | 2.0               | 0.0        |
| West Virginia       | 2000-2014       | 2,329              | 0.8              | 0.0        | 4.6        | 2,203             | 2.6        | 2.0        | 2,100             | 92.7                           | 8.0                     | 0.0               | 0.0        |
| Wisconsin           | 2000-2013       | 6,278              | 0.4              | 0.0        | 5.0        | 5,939             | 3.2        | 3.7        | 5,526             | 95.4                           | 5.8                     | 0.0               | 0.0        |
| Wyoming             | 2000-2013       | 550                | 0.4              | 0.0        | 4.7        | 522               | 0.8        | 5.9        | 487               | 95.3                           | 5.1                     | 0.0               | 0.0        |
| <b>ASIA</b>         |                 | <b>84,116</b>      | <b>0.7</b>       | <b>0.0</b> | <b>2.7</b> | <b>81,278</b>     | <b>8.3</b> | <b>1.5</b> | <b>73,306</b>     | <b>77.5</b>                    | <b>22.7</b>             | <b>0.5</b>        | <b>1.3</b> |
| Chinese registries  | 2003-2013       | 11,797             | 0.5              | 0.0        | 0.3        | 11,703            | 3.0        | 0.1        | 11,341            | 44.2                           | 60.4                    | 2.8               | 0.1        |
| Beijing             | 2003-2013       | 3,369              | 0.1              | 0.0        | 0.1        | 3,365             | 2.0        | 0.2        | 3,291             | 68.0                           | 32.0                    | 6.4               | 0.2        |
| Changle             | 2003-2013       | 241                | 2.5              | 0.0        | 0.0        | 235               | 2.1        | 0.4        | 229               | 42.8                           | 72.1                    | 0.9               | 0.0        |
| Cixian              | 2003-2013       | 248                | 0.0              | 0.0        | 0.0        | 248               | 4.8        | 0.0        | 236               | 71.6                           | 29.2                    | 0.0               | 0.0        |
| Dafeng              | 2003-2013       | 450                | 0.0              | 0.0        | 0.2        | 449               | 0.4        | 0.0        | 447               | 17.0                           | 90.6                    | 0.0               | 0.0        |
| Dalian              | 2003-2013       | 920                | 0.0              | 0.0        | 0.0        | 920               | 17.6       | 0.0        | 758               | 70.8                           | 30.6                    | 0.0               | 0.0        |
| Donghai             | 2003-2013       | 437                | 0.2              | 0.0        | 0.0        | 436               | 4.8        | 0.0        | 415               | 35.9                           | 65.1                    | 2.7               | 0.0        |
| Feicheng            | 2003-2013       | 405                | 0.0              | 0.0        | 0.2        | 404               | 0.7        | 0.0        | 401               | 23.9                           | 89.3                    | 1.5               | 0.0        |
| Ganyu               | 2003-2013       | 523                | 0.0              | 0.0        | 0.0        | 523               | 0.2        | 0.0        | 522               | 8.8                            | 93.7                    | 2.3               | 0.0        |
| Guanyun             | 2004-2013       | 462                | 0.0              | 0.0        | 0.0        | 462               | 1.7        | 0.0        | 454               | 24.7                           | 90.7                    | 1.8               | 0.0        |
| Haimen              | 2003-2013       | 819                | 0.0              | 0.0        | 1.0        | 811               | 3.1        | 0.0        | 786               | 43.8                           | 66.7                    | 0.5               | 0.0        |
| Haining             | 2003-2013       | 332                | 0.0              | 0.0        | 0.6        | 330               | 0.9        | 0.0        | 327               | 47.1                           | 82.9                    | 0.9               | 0.3        |
| Jianhu              | 2003-2013       | 458                | 0.0              | 0.0        | 0.0        | 458               | 0.0        | 0.0        | 458               | 10.3                           | 97.8                    | 3.1               | 0.0        |
| Jiashan             | 2003-2013       | 268                | 0.0              | 0.0        | 0.0        | 268               | 0.7        | 0.0        | 266               | 50.0                           | 50.4                    | 0.4               | 0.0        |
| Jintan              | 2003-2013       | 184                | 0.0              | 0.5        | 4.3        | 175               | 2.3        | 0.0        | 171               | 14.0                           | 86.0                    | 1.8               | 0.0        |
| Lianyungang         | 2008-2013       | 208                | 0.0              | 0.0        | 1.4        | 205               | 3.4        | 0.0        | 198               | 51.0                           | 67.7                    | 8.1               | 0.0        |
| Linzhou             | 2003-2013       | 653                | 0.0              | 0.0        | 0.3        | 651               | 2.5        | 0.0        | 635               | 17.2                           | 82.8                    | 0.0               | 0.0        |
| Qidong              | 2003-2013       | 855                | 0.0              | 0.0        | 0.2        | 853               | 0.0        | 0.0        | 853               | 25.2                           | 74.8                    | 1.1               | 0.0        |
| Sihui               | 2003-2013       | 178                | 3.4              | 0.6        | 0.6        | 170               | 8.2        | 0.0        | 156               | 28.2                           | 74.4                    | 6.4               | 1.3        |
| Taixing             | 2003-2013       | 321                | 13.4             | 0.0        | 0.0        | 278               | 0.4        | 0.0        | 277               | 5.1                            | 100.0                   | 0.7               | 0.0        |
| Yangzhong           | 2003-2013       | 55                 | 0.0              | 0.0        | 0.0        | 55                | 1.8        | 0.0        | 54                | 13.0                           | 100.0                   | 0.0               | 0.0        |
| Zhongshan           | 2003-2013       | 411                | 0.0              | 0.0        | 1.0        | 407               | 0.0        | 0.0        | 407               | 72.7                           | 31.9                    | 0.2               | 0.0        |
| Cyprus *            | 2004-2014       | 503                | 0.6              | 0.0        | 2.8        | 486               | 16.0       | 2.9        | 394               | 97.7                           | 3.3                     | 0.0               | 9.1        |
| Hong Kong *         | -               | -                  | -                | -          | -          | -                 | -          | -          | -                 | -                              | -                       | -                 | -          |
| Indian registries   | 2000-2014       | 180                | 0.0              | 0.0        | 0.6        | 179               | 8.4        | 1.1        | 162               | 56.8                           | 43.8                    | 3.1               | 0.0        |
| Guwahati            | -               | -                  | -                | -          | -          | -                 | -          | -          | -                 | -                              | -                       | -                 | -          |
| Karunagappally      | 2000-2014       | 180                | 0.0              | 0.0        | 0.6        | 179               | 8.4        | 1.1        | 162               | 56.8                           | 43.8                    | 3.1               | 0.0        |
| Iran (Golestan)     | -               | -                  | -                | -          | -          | -                 | -          | -          | -                 | -                              | -                       | -                 | -          |
| Israel *            | 2000-2013       | 6,358              | 0.0              | 0.0        | 6.3        | 5,959             | 9.8        | 2.4        | 5,235             | 91.5                           | 9.7                     | 0.0               | 0.0        |
| Japanese registries | 2000-2014       | 21,939             | 0.7              | 0.0        | 7.4        | 20,156            | 24.8       | 0.8        | 15,007            | 80.2                           | 19.5                    | 0.0               | 1.9        |
| Aichi               | 2003-2013       | 3,967              | 0.4              | 0.0        | 9.4        | 3,581             | 19.5       | 0.0        | 2,881             | 81.4                           | 20.8                    | 0.0               | 2.5        |
| Akita               | 2010-2014       | 308                | 1.6              | 0.0        | 13.3       | 262               | 0.0        | 1.1        | 259               | 55.2                           | 45.6                    | 0.0               | 22.8       |
| Ehime               | 2007-2013       | 824                | 0.2              | 0.0        | 9.8        | 741               | 20.9       | 0.0        | 586               | 74.1                           | 27.1                    | 0.0               | 0.0        |
| Fukui               | 2003-2009       | 267                | 0.4              | 0.0        | 15.0       | 226               | 8.0        | 0.0        | 208               | 73.6                           | 28.4                    | 0.0               | 1.9        |
| Gunma               | 2003-2012       | 981                | 8.1              | 0.0        | 0.2        | 900               | 38.0       | 2.6        | 535               | 57.6                           | 1.5                     | 0.0               | 2.1        |
| Hiroshima           | 2004-2008       | 735                | 0.7              | 0.0        | 11.2       | 648               | 24.8       | 0.0        | 487               | 85.0                           | 16.0                    | 0.0               | 1.2        |
| Hyogo               | 2007-2012       | 2,008              | 0.8              | 0.0        | 9.9        | 1,793             | 31.2       | 0.0        | 1,234             | 80.7                           | 21.2                    | 0.0               | 1.3        |
| Ibaraki             | 2006-2012       | 1,070              | 0.7              | 0.0        | 11.1       | 944               | 24.4       | 0.0        | 714               | 85.4                           | 16.9                    | 0.0               | 1.7        |
| Kanagawa            | 2000-2013       | 3,507              | 0.0              | 0.0        | 0.2        | 3,499             | 31.5       | 1.3        | 2,352             | 89.9                           | 15.2                    | 0.0               | 0.0        |
| Miyagi              | 2000-2010       | 1,215              | 1.3              | 0.0        | 0.0        | 1,199             | 23.0       | 2.4        | 894               | 80.2                           | 21.3                    | 0.0               | 2.0        |
| Niigata             | 2000-2013       | 1,609              | 0.6              | 0.0        | 9.9        | 1,441             | 22.3       | 3.7        | 1,066             | 86.5                           | 0.6                     | 0.0               | 0.0        |
| Osaka               | 2000-2008       | 3,114              | 0.0              | 0.0        | 8.8        | 2,839             | 26.1       | 0.0        | 2,098             | 75.6                           | 26.6                    | 0.0               | 3.8        |
| Saga                | 2006-2013       | 351                | 0.0              | 0.0        | 11.4       | 311               | 18.3       | 0.0        | 254               | 77.2                           | 24.0                    | 0.0               | 0.0        |
| Tochigi             | 2006-2013       | 916                | 0.5              | 0.0        | 11.0       | 810               | 20.6       | 0.0        | 643               | 80.4                           | 21.2                    | 0.0               | 1.6        |
| Yamagata            | 2003-2013       | 774                | 0.3              | 0.0        | 9.2        | 701               | 13.7       | 0.0        | 605               | 72.6                           | 28.4                    | 0.0               | 0.3        |
| Yamanashi           | 2008-2012       | 293                | 0.7              | 0.0        | 10.2       | 261               | 26.8       | 0.0        | 191               | 76.4                           | 25.1                    | 0.0               | 0.5        |
| Jordan *            | 2000-2014       | 1,625              | 0.1              | 0.0        | 1.9        | 1,593             | 0.5        | 6.4        | 1,483             | 95.5                           | 6.3                     | 3.4               | 0.0        |
| Korea * ‡           | 2000-2014       | 17,946             | 0.8              | 0.0        | 0.0        | 17,797            | 0.0        | 0.5        | 17,701            | 80.7                           | 20.1                    | 0.0               | 0.0        |
| Kuwait *            | 2000-2013       | 259                | 0.0              | 0.0        | 0.0        | 259               | 8.9        | 2.3        | 230               | 96.5                           | 3.9                     | 0.9               | 0.0        |
| Malaysia (Penang)   | 2000-2013       | 367                | 0.5              | 0.0        | 0.0        | 365               | 6.8        | 14.0       | 289               | 76.5                           | 29.4                    | 0.0               | 11.8       |
| Mongolia *          | -               | -                  | -                | -          | -          | -                 | -          | -          | -                 | -                              | -                       | -                 | -          |
| Qatar *             | 2000-2014       | 316                | 0.0              | 0.3        | 2.5        | 307               | 2.0        | 4.6        | 287               | 92.0                           | 8.7                     | 0.0               | 62.0       |
| Singapore *         | 2000-2014       | 1,300              | 0.0              | 0.0        | 0.5        | 1,293             | 3.2        | 3.9        | 1,202             | 90.2                           | 4.9                     | 0.0               | 0.0        |
| Taiwan *            | 2000-2014       | 8,492              | 0.1              | 0.0        | 0.0        | 8,482             | 0.0        | 0.8        | 8,410             | 87.8                           | 0.3                     | 0.0               | 0.0        |

Web-table 2.13: Data quality indicators, patients diagnosed during 2000-2014, by continent, country and registry: BRAIN (ADULTS)

|                                | Calendar period | Patients submitted | Ineligible (%) ¶ |            |            | Excluded (%) ¶¶   |            |            | Data quality indicators (%) ¶¶ |             |                         |                   |            |
|--------------------------------|-----------------|--------------------|------------------|------------|------------|-------------------|------------|------------|--------------------------------|-------------|-------------------------|-------------------|------------|
|                                |                 |                    | Incomplete dates | In situ    | Other      | Eligible patients | DCO        | Other      | Patients included              | MV          | Non-specific morphology | Lost to follow-up | Censored   |
| Thai registries                | 2000-2014       | 3,606              | 0.0              | 0.0        | 1.7        | 3,545             | 11.5       | 10.1       | 2,779                          | 64.3        | 35.9                    | 0.1               | 2.2        |
| Bangkok                        | 2000-2012       | 2,054              | 0.0              | 0.0        | 0.7        | 2,040             | 9.4        | 16.5       | 1,512                          | 74.0        | 26.0                    | 0.0               | 0.0        |
| Khon Kaen                      | 2000-2014       | 324                | 0.0              | 0.0        | 0.0        | 324               | 9.9        | 1.9        | 286                            | 62.6        | 37.4                    | 0.0               | 2.8        |
| Lampang                        | 2000-2014       | 239                | 0.0              | 0.0        | 0.0        | 239               | 15.9       | 2.9        | 194                            | 55.7        | 44.3                    | 0.0               | 0.0        |
| Lamphun                        | 2000-2014       | 240                | 0.0              | 0.0        | 0.0        | 240               | 23.8       | 3.8        | 174                            | 27.0        | 73.0                    | 0.0               | 0.0        |
| Lopburi                        | 2000-2014       | 358                | 0.0              | 0.0        | 4.2        | 343               | 16.6       | 0.0        | 286                            | 40.6        | 59.4                    | 0.0               | 17.5       |
| Songkhla                       | 2000-2014       | 391                | 0.0              | 0.0        | 8.2        | 359               | 8.9        | 0.0        | 327                            | 67.0        | 34.9                    | 0.6               | 1.2        |
| Turkish registries             | 2000-2013       | 9,428              | 1.9              | 0.0        | 1.0        | 9,154             | 2.3        | 1.7        | 8,786                          | 88.8        | 15.6                    | 0.1               | 4.1        |
| Ankara                         | 2008-2012       | 3,032              | 0.0              | 0.0        | 2.0        | 2,971             | 0.8        | 0.2        | 2,942                          | 94.2        | 12.6                    | 0.0               | 1.6        |
| Antalya                        | 2006-2012       | 795                | 0.9              | 0.0        | 0.0        | 788               | 1.5        | 3.2        | 751                            | 85.9        | 17.8                    | 0.0               | 0.8        |
| Bursa                          | 2006-2012       | 758                | 4.7              | 0.0        | 2.5        | 703               | 2.7        | 1.6        | 673                            | 92.1        | 13.1                    | 0.0               | 0.0        |
| Edirne                         | 2006-2012       | 139                | 5.8              | 0.0        | 2.2        | 128               | 3.9        | 0.8        | 122                            | 76.2        | 27.9                    | 0.0               | 0.0        |
| Erzurum                        | 2006-2012       | 268                | 4.9              | 0.0        | 1.1        | 252               | 2.0        | 7.1        | 229                            | 75.1        | 34.9                    | 0.0               | 0.9        |
| Eskisehir                      | 2006-2012       | 296                | 0.0              | 0.0        | 0.0        | 296               | 3.4        | 0.0        | 286                            | 79.0        | 0.0                     | 0.3               | 0.0        |
| Izmir                          | 2000-2013       | 3,168              | 3.4              | 0.0        | 0.0        | 3,058             | 3.9        | 2.8        | 2,855                          | 90.2        | 12.9                    | 0.0               | 10.5       |
| Samsun                         | 2006-2012       | 581                | 0.0              | 0.0        | 1.7        | 571               | 3.3        | 1.8        | 542                            | 79.5        | 25.3                    | 2.0               | 0.0        |
| Trabzon                        | 2006-2012       | 391                | 0.8              | 0.0        | 0.3        | 387               | 0.3        | 0.0        | 386                            | 70.5        | 41.2                    | 0.0               | 0.5        |
| <b>EUROPE</b>                  |                 | <b>322,638</b>     | <b>0.1</b>       | <b>0.0</b> | <b>2.0</b> | <b>315,656</b>    | <b>4.4</b> | <b>1.5</b> | <b>297,032</b>                 | <b>80.6</b> | <b>11.1</b>             | <b>0.6</b>        | <b>0.9</b> |
| Austria *                      | 2000-2014       | 9,591              | 0.0              | 0.0        | 9.2        | 8,706             | 9.7        | 2.9        | 7,615                          | 97.2        | 5.5                     | 0.0               | 0.0        |
| Belarus (Childhood) †          | -               | -                  | -                | -          | -          | -                 | -          | -          | -                              | -           | -                       | -                 | -          |
| Belgium *                      | 2004-2014       | 9,072              | 0.0              | 0.0        | 0.0        | 9,072             | 0.1        | 0.1        | 9,057                          | 96.1        | 4.4                     | 1.9               | 0.0        |
| Bulgaria *                     | -               | -                  | -                | -          | -          | -                 | -          | -          | -                              | -           | -                       | -                 | -          |
| Croatia *                      | 2000-2014       | 8,115              | 0.0              | 0.0        | 0.0        | 8,115             | 6.5        | 0.9        | 7,515                          | 44.4        | 1.6                     | 0.0               | 0.0        |
| Czech Republic *               | 2000-2014       | 11,755             | 0.0              | 0.0        | 0.2        | 11,731            | 2.9        | 3.3        | 11,007                         | 75.0        | 2.4                     | 0.0               | 0.0        |
| Denmark *                      | 2000-2014       | 8,991              | 0.0              | 0.0        | 0.4        | 8,951             | 0.0        | 0.0        | 8,951                          | 70.7        | 37.8                    | 0.3               | 0.0        |
| Estonia *                      | 2000-2012       | 1,425              | 0.0              | 0.0        | 3.4        | 1,376             | 5.5        | 0.4        | 1,295                          | 68.5        | 0.3                     | 0.3               | 0.0        |
| Finland *                      | 2000-2014       | 6,874              | 0.9              | 0.0        | 6.7        | 6,355             | 5.7        | 0.6        | 5,953                          | 87.1        | 0.7                     | 0.2               | 0.0        |
| French registries              | 2000-2010       | 7,656              | 0.4              | 0.0        | 0.6        | 7,580             | 0.0        | 0.6        | 7,532                          | 82.5        | 0.4                     | 1.2               | 0.0        |
| Bas-Rhin                       | 2000-2010       | 824                | 0.0              | 0.0        | 0.5        | 820               | 0.0        | 0.0        | 820                            | 77.0        | 0.0                     | 0.7               | 0.0        |
| Basse Normandie                | -               | -                  | -                | -          | -          | -                 | -          | -          | -                              | -           | -                       | -                 | -          |
| Burgundy Digestive             | -               | -                  | -                | -          | -          | -                 | -          | -          | -                              | -           | -                       | -                 | -          |
| Calvados                       | 2000-2010       | 468                | 0.0              | 0.0        | 0.4        | 466               | 0.0        | 0.0        | 466                            | 78.3        | 0.9                     | 0.0               | 0.0        |
| Calvados Digestive             | -               | -                  | -                | -          | -          | -                 | -          | -          | -                              | -           | -                       | -                 | -          |
| Côte-d'Or Gynaecologic         | -               | -                  | -                | -          | -          | -                 | -          | -          | -                              | -           | -                       | -                 | -          |
| Côte-d'Or Haematopoietic       | -               | -                  | -                | -          | -          | -                 | -          | -          | -                              | -           | -                       | -                 | -          |
| Doubs                          | 2000-2010       | 372                | 0.0              | 0.0        | 0.3        | 371               | 0.0        | 0.0        | 371                            | 85.7        | 0.0                     | 0.3               | 0.0        |
| Finistère                      | -               | -                  | -                | -          | -          | -                 | -          | -          | -                              | -           | -                       | -                 | -          |
| Gironde CNS                    | 2000-2010       | 1,253              | 1.6              | 0.0        | 2.6        | 1,201             | 0.0        | 1.2        | 1,187                          | 84.8        | 0.8                     | 3.2               | 0.0        |
| Gironde General                | -               | -                  | -                | -          | -          | -                 | -          | -          | -                              | -           | -                       | -                 | -          |
| Gironde Haematopoietic         | -               | -                  | -                | -          | -          | -                 | -          | -          | -                              | -           | -                       | -                 | -          |
| Haut-Rhin                      | 2000-2010       | 435                | 0.0              | 0.0        | 0.2        | 434               | 0.0        | 0.2        | 433                            | 93.8        | 0.2                     | 0.7               | 0.0        |
| Haute-Vienne                   | 2009-2009       | 33                 | 0.0              | 0.0        | 0.0        | 33                | 0.0        | 0.0        | 33                             | 84.8        | 0.0                     | 0.0               | 0.0        |
| Hérault                        | 2000-2010       | 728                | 0.0              | 0.0        | 0.1        | 727               | 0.0        | 1.1        | 719                            | 78.9        | 0.1                     | 1.5               | 0.0        |
| Isère                          | 2000-2010       | 934                | 0.0              | 0.0        | 0.4        | 930               | 0.0        | 1.0        | 921                            | 84.3        | 0.4                     | 0.0               | 0.0        |
| Lille Metro                    | 2008-2010       | 150                | 0.0              | 0.0        | 0.7        | 149               | 0.0        | 0.0        | 149                            | 80.5        | 0.0                     | 0.0               | 0.0        |
| Loire-Atlantique               | 2000-2010       | 1,390              | 0.6              | 0.0        | 0.1        | 1,380             | 0.0        | 0.9        | 1,367                          | 87.3        | 0.5                     | 1.4               | 0.0        |
| Manche                         | 2000-2010       | 393                | 0.0              | 0.0        | 0.0        | 393               | 0.0        | 0.0        | 393                            | 78.1        | 0.5                     | 1.0               | 0.0        |
| Somme                          | 2000-2010       | 334                | 0.0              | 0.0        | 0.0        | 334               | 0.0        | 0.6        | 332                            | 66.6        | 0.6                     | 1.5               | 0.0        |
| Tarn                           | 2000-2010       | 342                | 0.0              | 0.0        | 0.0        | 342               | 0.0        | 0.3        | 341                            | 80.4        | 0.3                     | 0.9               | 0.0        |
| France Childhood Haem †        | -               | -                  | -                | -          | -          | -                 | -          | -          | -                              | -           | -                       | -                 | -          |
| France Childhood Solid †       | -               | -                  | -                | -          | -          | -                 | -          | -          | -                              | -           | -                       | -                 | -          |
| German registries              | 2000-2014       | 34,337             | 0.4              | 0.0        | 2.6        | 33,327            | 16.3       | 0.7        | 27,683                         | 91.0        | 1.6                     | 0.3               | 7.9        |
| Brandenburg                    | 2000-2014       | 3,466              | 0.0              | 0.0        | 0.0        | 3,466             | 15.3       | 0.7        | 2,912                          | 94.8        | 1.2                     | 0.0               | 10.4       |
| Bremen                         | 2000-2013       | 870                | 0.0              | 0.0        | 8.7        | 794               | 14.4       | 0.1        | 679                            | 86.0        | 0.3                     | 2.4               | 0.0        |
| Hamburg                        | 2000-2013       | 1,912              | 0.0              | 0.0        | 3.6        | 1,843             | 11.9       | 0.5        | 1,615                          | 95.6        | 4.8                     | 3.3               | 0.0        |
| Lower Saxony                   | 2003-2013       | 7,269              | 1.7              | 0.0        | 4.8        | 6,798             | 18.6       | 0.5        | 5,496                          | 99.1        | 1.0                     | 0.0               | 10.8       |
| Mecklenburg-W. Pomerania       | 2000-2014       | 2,160              | 0.0              | 0.0        | 0.0        | 2,160             | 14.2       | 0.9        | 1,833                          | 93.2        | 1.5                     | 0.0               | 10.5       |
| Rhineland Palatinate           | 2000-2013       | 4,720              | 0.0              | 0.0        | 2.9        | 4,582             | 14.6       | 0.2        | 3,905                          | 63.2        | 0.4                     | 0.0               | 10.1       |
| Saarland                       | 2000-2012       | 1,188              | 0.0              | 0.0        | 2.9        | 1,153             | 13.7       | 2.1        | 971                            | 96.0        | 5.5                     | 0.0               | 0.0        |
| Saxony                         | 2000-2014       | 6,107              | 0.0              | 0.0        | 0.0        | 6,107             | 11.6       | 0.6        | 5,360                          | 92.8        | 1.7                     | 0.0               | 8.0        |
| Schleswig-Holstein             | 2000-2012       | 3,616              | 0.0              | 0.0        | 6.1        | 3,395             | 25.4       | 1.0        | 2,499                          | 98.1        | 2.0                     | 0.0               | 0.0        |
| Thuringia                      | 2000-2014       | 3,029              | 0.0              | 0.0        | 0.0        | 3,029             | 19.5       | 0.8        | 2,413                          | 96.0        | 1.3                     | 0.0               | 10.9       |
| Gibraltar *                    | 2000-2009       | 18                 | 16.7             | 0.0        | 5.6        | 14                | 0.0        | 21.4       | 11                             | 100.0       | 0.0                     | 0.0               | 9.1        |
| Greece (National Paediatric) † | -               | -                  | -                | -          | -          | -                 | -          | -          | -                              | -           | -                       | -                 | -          |
| Iceland *                      | 2000-2014       | 362                | 0.0              | 0.0        | 2.5        | 353               | 0.8        | 0.6        | 348                            | 79.9        | 20.1                    | 0.0               | 0.0        |
| Ireland *                      | 2000-2013       | 4,763              | 0.0              | 0.0        | 0.0        | 4,763             | 1.6        | 1.7        | 4,605                          | 72.7        | 1.3                     | 0.0               | 0.0        |
| Italian registries             | 2000-2014       | 29,270             | 0.0              | 0.0        | 0.2        | 29,205            | 0.9        | 2.1        | 28,325                         | 63.6        | 37.5                    | 0.7               | 0.7        |
| Alto Adige                     | 2000-2010       | 383                | 0.0              | 0.0        | 0.3        | 382               | 1.0        | 0.5        | 376                            | 81.9        | 18.4                    | 0.0               | 0.0        |
| Barletta-Andria-Trani          | 2006-2012       | 226                | 0.0              | 0.0        | 0.0        | 226               | 0.4        | 1.3        | 222                            | 61.7        | 38.7                    | 1.4               | 0.0        |
| Basilicata                     | 2006-2010       | 318                | 0.0              | 0.0        | 0.0        | 318               | 0.0        | 1.9        | 312                            | 56.7        | 43.6                    | 0.3               | 1.3        |
| Bergamo                        | 2007-2012       | 572                | 0.0              | 0.0        | 0.0        | 572               | 0.2        | 0.3        | 569                            | 65.0        | 35.5                    | 0.7               | 0.0        |
| Biella-Vercelli                | 2000-2010       | 263                | 0.0              | 0.0        | 0.0        | 263               | 0.4        | 1.1        | 259                            | 60.2        | 39.8                    | 0.4               | 1.9        |
| Brescia                        | 2000-2008       | 696                | 0.0              | 0.0        | 0.0        | 696               | 0.0        | 0.3        | 694                            | 51.6        | 49.6                    | 1.0               | 0.1        |
| Brindisi                       | 2006-2008       | 152                | 0.0              | 0.0        | 0.0        | 152               | 0.0        | 2.0        | 149                            | 55.7        | 45.0                    | 0.0               | 2.7        |
| Caserta                        | 2008-2010       | 239                | 0.0              | 0.0        | 0.0        | 239               | 0.0        | 11.3       | 212                            | 64.6        | 37.3                    | 0.5               | 1.9        |
| Catania-Messina-Enna           | 2003-2012       | 1,309              | 0.0              | 0.0        | 0.0        | 1,309             | 2.1        | 0.8        | 1,270                          | 66.1        | 39.0                    | 0.0               | 1.8        |
| Catanzaro                      | 2003-2009       | 184                | 0.0              | 0.0        | 0.0        | 184               | 0.0        | 3.3        | 178                            | 67.4        | 32.6                    | 0.0               | 0.0        |
| Como                           | 2003-2011       | 483                | 0.0              | 0.0        | 0.0        | 483               | 0.0        | 1.0        | 478                            | 75.9        | 24.1                    | 0.4               | 0.2        |
| Cremona                        | 2005-2010       | 214                | 0.0              | 0.0        | 0.0        | 214               | 1.9        | 1.4        | 207                            | 66.2        | 34.8                    | 1.0               | 0.0        |
| Ferrara                        | 2000-2011       | 501                | 0.0              | 0.0        | 0.0        | 501               | 0.0        | 0.6        | 498                            | 77.5        | 22.9                    | 0.4               | 0.6        |
| Friuli-Venezia-Giulia          | 2000-2010       | 1,231              | 0.0              | 0.0        | 0.1        | 1,230             | 1.1        | 0.1        | 1,215                          | 60.7        | 40.2                    | 0.1               | 0.0        |
| Genoa                          | 2000-2009       | 1,005              | 0.0              | 0.0        | 0.1        | 1,004             | 0.0        | 0.2        | 1,002                          | 67.1        | 33.2                    | 0.2               | 0.0        |
| Latina                         | 2000-2011       | 561                | 0.0              | 0.0        | 0.0        | 561               | 0.0        | 10.2       | 504                            | 66.5        | 34.3                    | 1.2               | 1.8        |
| Lecce                          | 2003-2008       | 553                | 0.0              | 0.0        | 0.0        | 553               | 0.0        | 7.6        | 511                            | 59.9        | 40.9                    | 0.0               | 0.8        |

Web-table 2.13: Data quality indicators, patients diagnosed during 2000-2014, by continent, country and registry: BRAIN (ADULTS)

|                      | Calendar period | Patients submitted | Ineligible (%) ¶ |         |       | Excluded (%) ¶¶   |      |       | Data quality indicators (%) †† |       |                         |                   |          |
|----------------------|-----------------|--------------------|------------------|---------|-------|-------------------|------|-------|--------------------------------|-------|-------------------------|-------------------|----------|
|                      |                 |                    | Incomplete dates | In situ | Other | Eligible patients | DCO  | Other | Patients included              | MV    | Non-specific morphology | Lost to follow-up | Censored |
| Mantova              | 2000-2010       | 367                | 0.0              | 0.0     | 0.0   | 367               | 2.2  | 1.1   | 355                            | 63.9  | 38.0                    | 0.0               | 0.0      |
| Milano               | 2000-2012       | 2,018              | 0.0              | 0.0     | 0.0   | 2,017             | 0.1  | 1.3   | 1,988                          | 76.6  | 24.2                    | 2.3               | 0.9      |
| Modena               | 2000-2012       | 822                | 0.0              | 0.0     | 0.0   | 822               | 0.0  | 1.9   | 806                            | 64.0  | 36.5                    | 0.0               | 1.7      |
| Monza-Brianza        | 2007-2012       | 493                | 0.0              | 0.0     | 0.0   | 493               | 0.0  | 0.6   | 490                            | 69.6  | 31.2                    | 0.6               | 0.0      |
| Naples               | 2000-2012       | 842                | 0.0              | 0.0     | 0.0   | 842               | 0.0  | 8.2   | 773                            | 65.3  | 35.4                    | 1.7               | 0.3      |
| Nuoro                | 2003-2012       | 184                | 0.0              | 0.0     | 0.0   | 184               | 1.1  | 0.5   | 181                            | 74.0  | 26.0                    | 0.0               | 0.0      |
| Palermo              | 2003-2012       | 1,088              | 0.0              | 0.0     | 0.0   | 1,088             | 5.4  | 2.1   | 1,006                          | 52.1  | 48.2                    | 0.5               | 0.0      |
| Parma                | 2000-2014       | 769                | 0.0              | 0.0     | 0.0   | 769               | 0.4  | 0.0   | 766                            | 70.1  | 31.1                    | 2.7               | 0.1      |
| Pavia                | 2003-2009       | 337                | 0.0              | 0.0     | 0.0   | 337               | 0.0  | 0.6   | 335                            | 58.8  | 41.8                    | 0.0               | 1.2      |
| Piacenza             | 2006-2011       | 202                | 0.0              | 0.0     | 0.0   | 202               | 0.0  | 5.9   | 190                            | 48.4  | 52.1                    | 0.0               | 4.7      |
| Ragusa               | 2000-2012       | 505                | 0.0              | 0.0     | 0.0   | 505               | 3.6  | 3.0   | 472                            | 56.6  | 47.2                    | 0.0               | 0.0      |
| Reggio Emilia        | 2000-2012       | 699                | 0.0              | 0.0     | 0.0   | 699               | 0.1  | 7.9   | 643                            | 62.1  | 38.1                    | 1.4               | 0.0      |
| Romagna              | 2000-2012       | 1,876              | 0.0              | 0.0     | 0.0   | 1,876             | 0.1  | 0.0   | 1,874                          | 51.9  | 48.2                    | 0.2               | 0.0      |
| Salerno              | 2000-2009       | 974                | 0.0              | 0.0     | 0.1   | 973               | 0.0  | 8.1   | 894                            | 63.9  | 36.1                    | 0.4               | 2.7      |
| Sassari              | 2000-2011       | 457                | 0.0              | 0.0     | 0.0   | 457               | 5.5  | 3.3   | 417                            | 49.9  | 63.8                    | 0.0               | 0.0      |
| Siracusa             | 2000-2012       | 413                | 0.0              | 0.0     | 0.0   | 413               | 5.8  | 0.7   | 386                            | 56.2  | 46.1                    | 0.0               | 1.0      |
| Sondrio              | 2000-2011       | 164                | 0.0              | 0.0     | 0.0   | 164               | 0.0  | 0.0   | 164                            | 68.3  | 32.3                    | 0.0               | 0.0      |
| Taranto              | 2006-2012       | 438                | 0.0              | 0.0     | 0.0   | 438               | 1.8  | 8.9   | 391                            | 62.9  | 37.6                    | 0.8               | 0.0      |
| Trapani              | 2002-2010       | 341                | 0.0              | 0.0     | 0.0   | 341               | 0.3  | 3.2   | 329                            | 43.5  | 63.8                    | 0.0               | 0.0      |
| Trento               | 2000-2010       | 394                | 0.0              | 0.0     | 0.0   | 394               | 1.0  | 2.8   | 379                            | 79.9  | 20.6                    | 1.8               | 0.0      |
| Turin                | 2000-2012       | 1,156              | 0.0              | 0.0     | 5.2   | 1,096             | 1.3  | 0.0   | 1,082                          | 59.7  | 40.9                    | 1.5               | 0.0      |
| Tuscany              | 2000-2009       | 1,344              | 0.0              | 0.0     | 0.0   | 1,344             | 1.0  | 1.9   | 1,306                          | 54.5  | 46.2                    | 0.0               | 2.1      |
| Umbria               | 2000-2013       | 1,238              | 0.0              | 0.0     | 0.0   | 1,238             | 0.3  | 0.4   | 1,229                          | 70.6  | 30.7                    | 0.6               | 0.1      |
| Varese               | 2000-2012       | 985                | 0.0              | 0.0     | 0.0   | 985               | 0.3  | 0.1   | 981                            | 74.5  | 25.7                    | 0.8               | 0.6      |
| Veneto               | 2000-2009       | 2,111              | 0.0              | 0.0     | 0.0   | 2,111             | 0.4  | 0.8   | 2,086                          | 62.1  | 38.4                    | 0.9               | 0.3      |
| Viterbo              | 2006-2010       | 163                | 0.0              | 0.0     | 0.0   | 163               | 3.7  | 6.7   | 146                            | 75.3  | 25.3                    | 0.0               | 8.9      |
| Piedmont Childhood   | -               | -                  | -                | -       | -     | -                 | -    | -     | -                              | -     | -                       | -                 | -        |
| Latvia *             | 2000-2014       | 2,654              | 0.0              | 0.0     | 43.7  | 1,493             | 0.0  | 5.2   | 1,415                          | 100.0 | 0.4                     | 0.0               | 0.0      |
| Lithuania *          | 2000-2012       | 3,514              | 0.0              | 0.0     | 3.0   | 3,407             | 12.2 | 1.5   | 2,942                          | 83.4  | 0.2                     | 0.0               | 0.4      |
| Malta *              | 2000-2013       | 366                | 0.0              | 0.0     | 1.9   | 359               | 8.1  | 4.2   | 315                            | 76.5  | 24.8                    | 0.0               | 0.0      |
| Netherlands *        | 2000-2014       | 17,411             | 0.0              | 0.0     | 0.0   | 17,407            | 0.2  | 0.7   | 17,261                         | 84.2  | 16.4                    | 0.6               | 0.0      |
| Norway *             | 2000-2014       | 6,739              | 0.0              | 0.0     | 14.9  | 5,736             | 0.6  | 0.9   | 5,647                          | 96.1  | 6.3                     | 0.4               | 0.0      |
| Poland *             | 2000-2014       | 39,723             | 0.0              | 0.0     | 0.3   | 39,612            | 4.2  | 0.4   | 37,794                         | 78.4  | 1.4                     | 0.0               | 0.0      |
| Greater Poland       | 2000-2014       | 3,387              | 0.0              | 0.0     | 0.1   | 3,382             | 7.3  | 0.4   | 3,124                          | 87.2  | 0.2                     | 0.0               | 0.0      |
| Holy Cross           | 2000-2014       | 1,562              | 0.0              | 0.0     | 0.1   | 1,560             | 2.4  | 0.3   | 1,518                          | 78.1  | 0.1                     | 0.0               | 0.0      |
| Kujavia-Pomerania    | 2000-2014       | 2,256              | 0.0              | 0.0     | 0.4   | 2,247             | 1.7  | 0.2   | 2,203                          | 91.0  | 2.4                     | 0.0               | 0.0      |
| Lesser Poland        | 2000-2014       | 3,165              | 0.0              | 0.0     | 0.2   | 3,160             | 6.6  | 0.1   | 2,949                          | 78.6  | 0.1                     | 0.0               | 0.0      |
| Łódź                 | 2000-2014       | 2,930              | 0.0              | 0.0     | 0.2   | 2,923             | 0.7  | 1.3   | 2,867                          | 68.6  | 0.2                     | 0.0               | 0.0      |
| Lower Silesia        | 2000-2014       | 3,671              | 0.0              | 0.0     | 0.5   | 3,654             | 0.6  | 1.2   | 3,590                          | 62.7  | 11.5                    | 0.1               | 0.0      |
| Lublin               | 2000-2014       | 2,566              | 0.0              | 0.0     | 0.1   | 2,563             | 9.4  | 0.3   | 2,314                          | 72.6  | 0.0                     | 0.0               | 0.0      |
| Lubush               | 2000-2014       | 923                | 0.0              | 0.0     | 0.1   | 922               | 1.3  | 0.1   | 909                            | 90.5  | 1.3                     | 0.0               | 0.0      |
| Mazovia              | 2000-2014       | 4,843              | 0.0              | 0.0     | 0.2   | 4,832             | 0.0  | 0.1   | 4,828                          | 78.1  | 0.2                     | 0.0               | 0.0      |
| Opole                | 2000-2014       | 843                | 0.0              | 0.0     | 0.2   | 841               | 0.1  | 0.4   | 837                            | 93.9  | 0.1                     | 0.0               | 0.0      |
| Podlaha              | 2000-2014       | 1,280              | 0.0              | 0.0     | 0.2   | 1,278             | 9.2  | 0.2   | 1,158                          | 64.5  | 0.0                     | 0.0               | 0.0      |
| Pomerania            | 2000-2014       | 2,162              | 0.0              | 0.0     | 0.1   | 2,159             | 16.0 | 0.2   | 1,810                          | 93.1  | 0.1                     | 0.0               | 0.0      |
| Silesia              | 2000-2014       | 4,915              | 0.0              | 0.0     | 0.5   | 4,891             | 1.4  | 0.1   | 4,817                          | 74.3  | 0.3                     | 0.0               | 0.0      |
| Subcarpathia         | 2000-2014       | 2,408              | 0.0              | 0.0     | 0.2   | 2,403             | 6.9  | 1.0   | 2,214                          | 90.6  | 0.0                     | 0.0               | 0.0      |
| Varmia-Mazuria       | 2000-2014       | 1,320              | 0.0              | 0.0     | 0.4   | 1,315             | 1.0  | 0.3   | 1,298                          | 87.9  | 0.8                     | 0.0               | 0.1      |
| West Pomerania       | 2000-2014       | 1,492              | 0.0              | 0.0     | 0.7   | 1,482             | 8.1  | 0.3   | 1,358                          | 69.8  | 0.0                     | 0.0               | 0.0      |
| Portugal *           | 2000-2014       | 8,158              | 0.5              | 0.0     | 3.9   | 7,796             | 0.2  | 5.5   | 7,348                          | 92.2  | 3.8                     | 1.9               | 0.0      |
| Azores               | 2000-2014       | 229                | 0.0              | 0.0     | 0.0   | 229               | 7.4  | 13.1  | 182                            | 73.1  | 27.5                    | 2.2               | 1.6      |
| Portugal Central     | 2007-2010       | 585                | 0.0              | 0.0     | 0.0   | 585               | 0.0  | 0.0   | 585                            | 95.2  | 4.8                     | 0.2               | 0.0      |
| Portugal North       | 2000-2010       | 2,083              | 2.0              | 0.0     | 4.9   | 1,939             | 0.0  | 0.5   | 1,930                          | 95.6  | 6.1                     | 0.1               | 0.0      |
| Portugal South       | 2000-2014       | 5,261              | 0.0              | 0.0     | 4.1   | 5,043             | 0.0  | 7.8   | 4,651                          | 91.2  | 1.8                     | 2.8               | 0.0      |
| Romania (Cluj)       | 2006-2012       | 449                | 0.0              | 0.0     | 1.8   | 441               | 32.4 | 1.6   | 291                            | 88.0  | 13.1                    | 0.0               | 0.0      |
| Russian registries ‡ | 2000-2014       | 4,989              | 0.0              | 0.0     | 0.3   | 4,973             | 1.1  | 9.5   | 4,449                          | 65.6  | 4.4                     | 2.4               | 0.9      |
| Arkhangelsk          | 2000-2014       | 1,124              | 0.0              | 0.0     | 0.1   | 1,123             | 1.5  | 15.1  | 936                            | 65.8  | 4.9                     | 0.5               | 0.0      |
| Karelia              | 2000-2014       | 503                | 0.0              | 0.0     | 0.4   | 501               | 1.2  | 6.2   | 464                            | 62.5  | 2.4                     | 0.9               | 2.4      |
| Omsk                 | 2000-2014       | 608                | 0.0              | 0.0     | 0.0   | 608               | 0.0  | 6.4   | 569                            | 96.5  | 13.2                    | 6.0               | 4.6      |
| Samara               | 2000-2014       | 2,302              | 0.0              | 0.0     | 0.0   | 2,302             | 1.3  | 7.9   | 2,091                          | 56.5  | 3.1                     | 2.6               | 0.0      |
| Tomsk                | 2005-2014       | 452                | 0.0              | 0.0     | 2.9   | 439               | 0.0  | 11.4  | 389                            | 72.2  | 0.0                     | 2.3               | 0.5      |
| Slovakia *           | 2000-2010       | 4,304              | 0.0              | 0.0     | 2.9   | 4,180             | 11.6 | 0.0   | 3,695                          | 77.8  | 22.5                    | 0.0               | 0.0      |
| Slovenia *           | 2000-2013       | 2,271              | 0.0              | 0.0     | 12.9  | 1,979             | 1.8  | 0.0   | 1,943                          | 78.5  | 0.4                     | 0.2               | 0.0      |
| Spanish registries   | 2000-2013       | 9,235              | 0.2              | 0.0     | 2.0   | 9,037             | 3.2  | 0.7   | 8,685                          | 72.5  | 3.4                     | 0.4               | 0.0      |
| Basque Country       | 2000-2013       | 3,008              | 0.0              | 0.0     | 0.0   | 3,007             | 2.2  | 0.8   | 2,917                          | 66.6  | 0.5                     | 0.2               | 0.0      |
| Canaries             | 2000-2011       | 1,472              | 0.0              | 0.0     | 4.1   | 1,412             | 3.1  | 0.0   | 1,368                          | 74.5  | 0.1                     | 0.1               | 0.1      |
| Girona               | 2000-2013       | 872                | 0.8              | 0.0     | 4.6   | 825               | 3.6  | 0.0   | 795                            | 85.3  | 15.2                    | 2.8               | 0.0      |
| Granada              | 2000-2012       | 906                | 0.0              | 0.0     | 3.0   | 879               | 5.2  | 0.0   | 833                            | 71.4  | 0.0                     | 0.0               | 0.0      |
| Mallorca             | 2000-2012       | 706                | 1.1              | 0.0     | 5.0   | 663               | 6.0  | 1.2   | 615                            | 71.4  | 0.8                     | 1.6               | 0.0      |
| Murcia               | 2000-2010       | 931                | 0.0              | 0.0     | 1.9   | 913               | 3.5  | 0.1   | 880                            | 82.8  | 17.2                    | 0.0               | 0.0      |
| Navarra              | 2000-2010       | 687                | 0.0              | 0.0     | 0.1   | 686               | 2.2  | 0.0   | 671                            | 56.0  | 0.3                     | 0.0               | 0.0      |
| Tarragona            | 2000-2011       | 653                | 0.2              | 0.0     | 0.0   | 652               | 2.9  | 4.1   | 606                            | 85.1  | 0.5                     | 0.0               | 0.0      |
| Spain Childhood      | -               | -                  | -                | -       | -     | -                 | -    | -     | -                              | -     | -                       | -                 | -        |
| Valencia Childhood   | -               | -                  | -                | -       | -     | -                 | -    | -     | -                              | -     | -                       | -                 | -        |
| Sweden *             | 2000-2014       | 9,559              | 0.0              | 0.0     | 0.1   | 9,554             | 1.2  | 1.2   | 9,327                          | 88.8  | 11.7                    | 0.2               | 0.0      |
| Swiss registries     | 2000-2014       | 4,372              | 0.0              | 0.0     | 3.3   | 4,227             | 1.8  | 1.1   | 4,102                          | 89.8  | 4.3                     | 3.6               | 2.4      |
| Basel                | 2000-2011       | 218                | 0.0              | 0.0     | 0.5   | 217               | 0.5  | 8.3   | 198                            | 100.0 | 0.0                     | 0.5               | 1.0      |
| Fribourg             | 2006-2014       | 206                | 0.0              | 0.0     | 10.2  | 185               | 0.0  | 9.2   | 168                            | 88.1  | 11.9                    | 4.2               | 0.0      |
| Geneva               | 2000-2013       | 469                | 0.0              | 0.0     | 0.0   | 469               | 1.5  | 0.6   | 459                            | 84.3  | 15.9                    | 4.8               | 0.0      |
| Graubünden-Glarus    | 2000-2014       | 302                | 0.0              | 0.0     | 4.0   | 290               | 0.0  | 0.0   | 290                            | 79.7  | 0.0                     | 24.1              | 0.0      |
| Neuchâtel            | 2000-2014       | 171                | 0.0              | 0.0     | 0.0   | 171               | 1.8  | 0.6   | 167                            | 77.8  | 5.4                     | 0.6               | 2.4      |
| St Gallen-Appenzell  | 2000-2014       | 659                | 0.0              | 0.0     | 4.6   | 629               | 0.6  | 0.0   | 625                            | 86.6  | 0.0                     | 3.2               | 0.0      |
| Ticino               | 2000-2014       | 399                | 0.0              | 0.0     | 0.0   | 399               | 5.3  | 0.3   | 377                            | 96.3  | 4.0                     | 1.1               | 0.3      |
| Valais               | 2000-2014       | 369                | 0.0              | 0.0     | 0.0   | 369               | 0.5  | 0.0   | 367                            | 78.5  | 0.3                     | 2.2               | 0.0      |

Web-table 2.13: Data quality indicators, patients diagnosed during 2000-2014, by continent, country and registry: BRAIN (ADULTS)

|                              | Calendar period | Patients submitted | Ineligible (%) ¶ |            |            | Eligible patients | Excluded (%) |            | Patients included | Data quality indicators (%) †† |                         |                   |            |
|------------------------------|-----------------|--------------------|------------------|------------|------------|-------------------|--------------|------------|-------------------|--------------------------------|-------------------------|-------------------|------------|
|                              |                 |                    | Incomplete dates | In situ    | Other      |                   | DCO          | Other      |                   | MV                             | Non-specific morphology | Lost to follow-up | Censored   |
| Zürich                       | 2000-2013       | 1,579              | 0.0              | 0.0        | 5.1        | 1,498             | 2.7          | 0.5        | 1,451             | 96.2                           | 3.9                     | 1.0               | 6.3        |
| Switzerland (Childhood) †    | -               | -                  |                  |            |            |                   |              |            |                   |                                |                         |                   |            |
| United Kingdom *             | 2000-2014       | 76,665             | 0.1              | 0.0        | 0.8        | 75,907            | 3.4          | 1.9        | 71,921            | 83.5                           | 14.5                    | 1.0               | 0.0        |
| England                      | 2000-2014       | 63,002             | 0.2              | 0.0        | 0.1        | 62,859            | 3.8          | 1.8        | 59,346            | 85.9                           | 15.1                    | 1.2               | 0.0        |
| Northern Ireland             | 2000-2014       | 2,052              | 0.0              | 0.0        | 0.2        | 2,047             | 1.2          | 1.1        | 2,000             | 65.9                           | 34.5                    | 0.0               | 0.0        |
| Scotland                     | 2000-2014       | 7,158              | 0.0              | 0.0        | 8.5        | 6,549             | 0.7          | 0.0        | 6,502             | 64.9                           | 0.8                     | 0.1               | 0.0        |
| Wales                        | 2000-2014       | 4,453              | 0.0              | 0.0        | 0.0        | 4,452             | 2.7          | 5.8        | 4,073             | 86.6                           | 17.4                    | 0.0               | 0.0        |
| <b>OCEANIA</b>               |                 | <b>26,690</b>      | <b>0.3</b>       | <b>0.0</b> | <b>1.5</b> | <b>26,199</b>     | <b>1.9</b>   | <b>1.5</b> | <b>25,294</b>     | <b>92.4</b>                    | <b>6.4</b>              | <b>0.0</b>        | <b>0.0</b> |
| Australia *                  | 2000-2014       | 22,797             | 0.4              | 0.0        | 1.7        | 22,306            | 1.6          | 1.7        | 21,569            | 92.2                           | 6.4                     | 0.0               | 0.0        |
| Australian Capital Territory | 2000-2013       | 310                | 0.0              | 0.0        | 0.0        | 310               | 1.6          | 8.7        | 278               | 98.6                           | 1.1                     | 0.0               | 0.0        |
| New South Wales              | 2000-2012       | 6,134              | 0.2              | 0.0        | 3.3        | 5,919             | 1.4          | 1.0        | 5,773             | 98.3                           | 2.1                     | 0.0               | 0.0        |
| Northern Territory           | 2000-2013       | 103                | 0.0              | 0.0        | 0.0        | 103               | 0.0          | 0.0        | 103               | 82.5                           | 0.0                     | 0.0               | 0.0        |
| Queensland                   | 2000-2014       | 5,910              | 1.4              | 0.0        | 2.4        | 5,684             | 1.7          | 3.6        | 5,383             | 92.3                           | 8.0                     | 0.0               | 0.0        |
| South Australia              | 2000-2013       | 1,635              | 0.0              | 0.0        | 0.0        | 1,635             | 0.2          | 0.7        | 1,621             | 78.7                           | 0.2                     | 0.0               | 0.0        |
| Tasmania                     | 2000-2013       | 651                | 0.0              | 0.0        | 7.7        | 601               | 1.2          | 4.7        | 566               | 93.1                           | 7.1                     | 0.0               | 0.0        |
| Victoria                     | 2000-2014       | 5,972              | 0.0              | 0.0        | 0.0        | 5,972             | 2.7          | 0.5        | 5,780             | 88.1                           | 11.9                    | 0.0               | 0.0        |
| Western Australia            | 2000-2014       | 2,082              | 0.0              | 0.0        | 0.0        | 2,082             | 0.5          | 0.3        | 2,065             | 96.0                           | 4.4                     | 0.0               | 0.0        |
| New Zealand *                | 2000-2014       | 3,893              | 0.0              | 0.0        | 0.0        | 3,893             | 3.6          | 0.7        | 3,725             | 93.7                           | 6.7                     | 0.0               | 0.0        |
| <b>Total</b>                 |                 | <b>728,639</b>     | <b>0.4</b>       | <b>0.0</b> | <b>3.2</b> | <b>702,131</b>    | <b>4.4</b>   | <b>2.1</b> | <b>656,659</b>    | <b>85.4</b>                    | <b>11.2</b>             | <b>0.7</b>        | <b>0.6</b> |

Web-table 2.14: Data quality indicators, patients diagnosed during 2000-2014, by continent, country and registry: MYELOID MALIGNANCIES (ADULTS)

|                                    | Calendar period | Patients submitted | Ineligible (%) ¶ |            |            | Eligible patients | Excluded (%) |            | Patients included | Data quality indicators (%) †† |                         |                   |             |
|------------------------------------|-----------------|--------------------|------------------|------------|------------|-------------------|--------------|------------|-------------------|--------------------------------|-------------------------|-------------------|-------------|
|                                    |                 |                    | Incomplete dates | In situ    | Other      |                   | DCO          | Other      |                   | MV                             | Non-specific morphology | Lost to follow-up | Censored    |
| <b>AFRICA</b>                      |                 | <b>571</b>         | <b>23.6</b>      | <b>0.0</b> | <b>0.4</b> | <b>434</b>        | <b>0.5</b>   | <b>1.6</b> | <b>425</b>        | <b>98.8</b>                    | <b>23.8</b>             | <b>1.2</b>        | <b>43.8</b> |
| Algerian registries                | 2000-2014       | 359                | 17.0             | 0.0        | 0.6        | 296               | 0.0          | 2.0        | 290               | 99.3                           | 21.4                    | 0.0               | 46.2        |
| Annaba                             | 2000-2011       | 169                | 6.5              | 0.0        | 1.2        | 156               | 0.0          | 0.0        | 156               | 100.0                          | 12.8                    | 0.0               | 48.7        |
| Sétif                              | 2010-2014       | 190                | 26.3             | 0.0        | 0.0        | 140               | 0.0          | 4.3        | 134               | 98.5                           | 31.3                    | 0.0               | 43.3        |
| Tlemcen                            | -               | -                  | -                | -          | -          | -                 | -            | -          | -                 | -                              | -                       | -                 | -           |
| Mali (Bamako)                      | -               | -                  | -                | -          | -          | -                 | -            | -          | -                 | -                              | -                       | -                 | -           |
| Mauritius *                        | 2010-2012       | 42                 | 0.0              | 0.0        | 0.0        | 42                | 0.0          | 0.0        | 42                | 100.0                          | 38.1                    | 0.0               | 0.0         |
| Morocco (Casablanca)               | -               | -                  | -                | -          | -          | -                 | -            | -          | -                 | -                              | -                       | -                 | -           |
| Nigeria (Ibadan)                   | 2005-2014       | 153                | 48.4             | 0.0        | 0.0        | 79                | 2.5          | 1.3        | 76                | 96.1                           | 15.8                    | 0.0               | 57.9        |
| South Africa (Eastern Cape)        | 2000-2013       | 17                 | 0.0              | 0.0        | 0.0        | 17                | 0.0          | 0.0        | 17                | 100.0                          | 64.7                    | 29.4              | 47.1        |
| <b>AMERICA (Central and South)</b> |                 | <b>12,595</b>      | <b>3.9</b>       | <b>0.0</b> | <b>0.7</b> | <b>12,013</b>     | <b>9.3</b>   | <b>0.5</b> | <b>10,842</b>     | <b>98.2</b>                    | <b>14.3</b>             | <b>0.4</b>        | <b>4.9</b>  |
| Argentinian registries             | 2002-2013       | 1,805              | 2.4              | 0.0        | 0.9        | 1,745             | 8.9          | 0.1        | 1,588             | 99.9                           | 15.1                    | 0.0               | 0.0         |
| Chubut                             | 2008-2013       | 78                 | 56.4             | 0.0        | 0.0        | 34                | 0.0          | 0.0        | 34                | 97.1                           | 14.7                    | 0.0               | 0.0         |
| Córdoba                            | 2004-2012       | 559                | 0.0              | 0.0        | 2.1        | 547               | 27.2         | 0.0        | 398               | 100.0                          | 13.8                    | 0.0               | 0.0         |
| Mendoza                            | 2003-2013       | 1,168              | 0.0              | 0.0        | 0.3        | 1,164             | 0.6          | 0.1        | 1,156             | 100.0                          | 15.6                    | 0.0               | 0.0         |
| Tierra del Fuego                   | -               | -                  | -                | -          | -          | -                 | -            | -          | -                 | -                              | -                       | -                 | -           |
| Argentina (Childhood) †            | -               | -                  | -                | -          | -          | -                 | -            | -          | -                 | -                              | -                       | -                 | -           |
| Brazilian registries               | 2000-2014       | 1,080              | 0.0              | 0.0        | 0.0        | 1,080             | 21.1         | 0.0        | 852               | 99.8                           | 5.9                     | 0.0               | 0.2         |
| Aracaju                            | 2000-2012       | 204                | 0.0              | 0.0        | 0.0        | 204               | 16.2         | 0.0        | 171               | 100.0                          | 9.9                     | 0.0               | 0.0         |
| Cuiabá                             | -               | -                  | -                | -          | -          | -                 | -            | -          | -                 | -                              | -                       | -                 | -           |
| Curitiba                           | 2000-2012       | 755                | 0.0              | 0.0        | 0.0        | 755               | 25.8         | 0.0        | 560               | 99.6                           | 5.4                     | 0.0               | 0.0         |
| Goiânia                            | -               | -                  | -                | -          | -          | -                 | -            | -          | -                 | -                              | -                       | -                 | -           |
| Jaú                                | 2000-2014       | 121                | 0.0              | 0.0        | 0.0        | 121               | 0.0          | 0.0        | 121               | 100.0                          | 2.5                     | 0.0               | 1.7         |
| São Paulo                          | -               | -                  | -                | -          | -          | -                 | -            | -          | -                 | -                              | -                       | -                 | -           |
| Chilean registries                 | 2000-2012       | 656                | 0.0              | 0.0        | 0.0        | 656               | 0.6          | 0.0        | 652               | 99.8                           | 11.2                    | 0.0               | 5.7         |
| Antofagasta                        | 2003-2010       | 116                | 0.0              | 0.0        | 0.0        | 116               | 0.0          | 0.0        | 116               | 100.0                          | 17.2                    | 0.0               | 3.4         |
| Biobio                             | 2003-2012       | 163                | 0.0              | 0.0        | 0.0        | 163               | 1.2          | 0.0        | 161               | 100.0                          | 9.3                     | 0.0               | 2.5         |
| Concepción                         | 2006-2010       | 186                | 0.0              | 0.0        | 0.0        | 186               | 1.1          | 0.0        | 184               | 99.5                           | 15.8                    | 0.0               | 4.9         |
| Los Rios                           | 2000-2012       | 191                | 0.0              | 0.0        | 0.0        | 191               | 0.0          | 0.0        | 191               | 100.0                          | 4.7                     | 0.0               | 10.5        |
| Colombian registries               | 2000-2014       | 1,544              | 2.5              | 0.0        | 0.3        | 1,501             | 1.1          | 0.5        | 1,476             | 98.8                           | 16.5                    | 0.0               | 19.6        |
| Bucaramanga                        | -               | -                  | -                | -          | -          | -                 | -            | -          | -                 | -                              | -                       | -                 | -           |
| Cali                               | 2000-2014       | 1,313              | 0.5              | 0.0        | 0.1        | 1,306             | 0.9          | 0.4        | 1,289             | 98.7                           | 16.2                    | 0.0               | 20.2        |
| Manizales                          | 2003-2012       | 97                 | 24.7             | 0.0        | 0.0        | 73                | 0.0          | 4.1        | 70                | 100.0                          | 21.4                    | 0.0               | 40.0        |
| Pasto                              | 2000-2012       | 134                | 6.7              | 0.0        | 2.2        | 122               | 4.1          | 0.0        | 117               | 99.1                           | 16.2                    | 0.0               | 0.9         |
| Costa Rica *                       | 2002-2014       | 933                | 0.0              | 0.0        | 5.9        | 878               | 1.9          | 0.5        | 857               | 98.2                           | 21.2                    | 0.0               | 0.0         |
| Cuba *                             | -               | -                  | -                | -          | -          | -                 | -            | -          | -                 | -                              | -                       | -                 | -           |
| Ecuadorian registries              | 2000-2013       | 1,759              | 7.5              | 0.0        | 0.2        | 1,624             | 6.7          | 1.7        | 1,489             | 98.9                           | 10.3                    | 1.4               | 1.3         |
| Cuenca                             | 2000-2012       | 140                | 35.7             | 0.0        | 0.0        | 90                | 5.6          | 0.0        | 85                | 96.5                           | 18.8                    | 0.0               | 12.9        |
| Guayaquil                          | 2005-2013       | 537                | 0.2              | 0.0        | 0.0        | 536               | 3.7          | 5.0        | 489               | 98.2                           | 11.9                    | 0.0               | 0.0         |
| Loja                               | 2000-2013       | 140                | 2.1              | 0.0        | 0.0        | 137               | 0.0          | 0.0        | 137               | 98.5                           | 8.8                     | 15.3              | 0.0         |
| Manabí                             | 2000-2013       | 214                | 7.9              | 0.0        | 0.9        | 195               | 23.1         | 0.0        | 150               | 98.7                           | 8.0                     | 0.0               | 0.7         |
| Quito                              | 2000-2013       | 728                | 8.4              | 0.0        | 0.1        | 666               | 5.7          | 0.0        | 628               | 99.8                           | 8.8                     | 0.0               | 1.1         |
| Guadeloupe *                       | 2008-2013       | 118                | 0.0              | 0.0        | 2.5        | 115               | 0.0          | 0.0        | 115               | 100.0                          | 3.5                     | 0.0               | 40.9        |
| Martinique *                       | 2000-2012       | 502                | 0.0              | 0.0        | 0.2        | 501               | 0.0          | 3.8        | 482               | 100.0                          | 1.2                     | 4.8               | 0.0         |
| Mexico (Childhood) †               | -               | -                  | -                | -          | -          | -                 | -            | -          | -                 | -                              | -                       | -                 | -           |
| Peru (Lima)                        | 2010-2012       | 1,105              | 0.0              | 0.0        | 0.4        | 1,101             | 19.1         | 0.0        | 891               | 92.7                           | 16.5                    | 0.0               | 15.2        |
| Puerto Rico *                      | 2000-2011       | 3,093              | 9.0              | 0.0        | 0.1        | 2,812             | 13.2         | 0.0        | 2,440             | 96.9                           | 18.6                    | 0.0               | 0.0         |
| Uruguay *                          | -               | -                  | -                | -          | -          | -                 | -            | -          | -                 | -                              | -                       | -                 | -           |
| <b>AMERICA (North)</b>             |                 | <b>542,774</b>     | <b>2.9</b>       | <b>0.0</b> | <b>0.1</b> | <b>526,342</b>    | <b>3.4</b>   | <b>0.0</b> | <b>508,562</b>    | <b>98.8</b>                    | <b>3.1</b>              | <b>0.9</b>        | <b>0.0</b>  |
| Canadian registries                | 2000-2014       | 51,416             | 0.6              | 0.0        | 1.0        | 50,613            | 2.3          | 0.0        | 49,474            | 97.0                           | 4.9                     | 0.0               | 0.0         |
| Alberta                            | 2000-2014       | 6,028              | 1.0              | 0.0        | 0.0        | 5,963             | 0.5          | 0.0        | 5,934             | 100.0                          | 1.9                     | 0.0               | 0.0         |
| British Columbia                   | 2000-2014       | 9,446              | 1.4              | 0.0        | 5.2        | 8,824             | 4.2          | 0.0        | 8,456             | 98.6                           | 3.2                     | 0.0               | 0.0         |
| Manitoba                           | 2000-2014       | 2,647              | 1.0              | 0.0        | 0.2        | 2,615             | 2.9          | 0.0        | 2,539             | 99.9                           | 1.8                     | 0.0               | 0.0         |
| New Brunswick                      | 2000-2014       | 1,460              | 0.0              | 0.0        | 0.1        | 1,459             | 0.5          | 0.0        | 1,452             | 99.9                           | 4.1                     | 0.0               | 0.0         |
| Newfoundland & Labrador            | 2000-2014       | 715                | 0.3              | 0.0        | 0.1        | 712               | 4.1          | 0.0        | 683               | 98.8                           | 6.0                     | 0.0               | 0.0         |
| Nova Scotia                        | 2000-2014       | 1,653              | 3.8              | 0.0        | 0.1        | 1,589             | 2.3          | 0.0        | 1,552             | 98.1                           | 7.9                     | 0.0               | 0.0         |
| Ontario                            | 2000-2014       | 27,103             | 0.0              | 0.0        | 0.0        | 27,103            | 1.9          | 0.0        | 26,587            | 95.3                           | 6.5                     | 0.0               | 0.0         |
| Prince Edward Island               | 2000-2014       | 310                | 0.0              | 0.0        | 1.3        | 306               | 1.0          | 0.0        | 303               | 99.7                           | 3.3                     | 0.0               | 0.0         |
| Saskatchewan                       | 2000-2014       | 2,054              | 0.5              | 0.0        | 0.1        | 2,042             | 3.6          | 0.0        | 1,968             | 98.0                           | 3.3                     | 0.0               | 0.0         |
| US registries                      | 2000-2014       | 491,358            | 3.2              | 0.0        | 0.0        | 475,729           | 3.5          | 0.0        | 459,088           | 99.0                           | 3.0                     | 1.0               | 0.0         |
| Alabama                            | 2000-2014       | 7,674              | 1.4              | 0.0        | 0.0        | 7,564             | 2.5          | 0.0        | 7,376             | 97.6                           | 5.2                     | 0.0               | 0.0         |
| Alaska                             | 2000-2013       | 784                | 7.4              | 0.0        | 0.0        | 726               | 1.7          | 0.0        | 714               | 99.4                           | 2.0                     | 0.0               | 0.0         |
| Arkansas                           | 2000-2011       | 4,058              | 0.7              | 0.0        | 0.0        | 4,029             | 2.5          | 0.0        | 3,928             | 99.1                           | 2.5                     | 0.0               | 0.0         |
| California                         | 2000-2011       | 48,188             | 7.7              | 0.0        | 0.0        | 44,485            | 2.2          | 0.0        | 43,509            | 99.1                           | 2.8                     | 0.0               | 0.0         |
| Greater Bay Area                   | 2000-2014       | 12,013             | 7.3              | 0.0        | 0.0        | 11,140            | 2.5          | 0.1        | 10,857            | 99.4                           | 2.2                     | 4.8               | 0.0         |
| Greater California                 | 2000-2014       | 34,740             | 7.5              | 0.0        | 0.0        | 32,127            | 2.3          | 0.0        | 31,394            | 98.9                           | 3.1                     | 4.9               | 0.0         |
| Los Angeles                        | 2000-2014       | 15,216             | 5.7              | 0.0        | 0.0        | 14,342            | 2.0          | 0.0        | 14,055            | 99.4                           | 2.0                     | 10.0              | 0.0         |
| Colorado                           | 2000-2013       | 7,459              | 1.2              | 0.0        | 0.0        | 7,370             | 6.1          | 0.0        | 6,923             | 98.9                           | 2.3                     | 0.0               | 0.0         |
| Connecticut                        | 2000-2014       | 8,004              | 0.9              | 0.0        | 0.0        | 7,934             | 3.8          | 0.0        | 7,635             | 99.3                           | 2.9                     | 2.9               | 0.0         |
| Delaware                           | 2000-2014       | 1,765              | 1.0              | 0.0        | 0.0        | 1,748             | 5.8          | 0.0        | 1,646             | 98.3                           | 3.0                     | 0.0               | 0.0         |
| Florida                            | 2000-2013       | 46,814             | 0.3              | 0.0        | 0.0        | 46,670            | 3.9          | 0.1        | 44,811            | 99.8                           | 2.6                     | 0.0               | 0.0         |
| Georgia                            | 2000-2014       | 15,833             | 0.2              | 0.0        | 0.0        | 15,808            | 2.9          | 0.0        | 15,356            | 99.1                           | 2.9                     | 0.0               | 0.0         |
| Atlanta                            | 2000-2014       | 4,618              | 0.2              | 0.0        | 0.0        | 4,610             | 1.8          | 0.0        | 4,524             | 99.6                           | 2.5                     | 0.0               | 0.0         |
| Hawaii                             | 2000-2014       | 2,702              | 1.7              | 0.0        | 0.0        | 2,656             | 2.7          | 0.0        | 2,584             | 99.6                           | 2.6                     | 3.1               | 0.0         |
| Idaho                              | 2000-2014       | 3,204              | 1.9              | 0.0        | 0.0        | 3,144             | 4.2          | 0.0        | 3,011             | 99.0                           | 2.2                     | 0.0               | 0.0         |
| Indiana                            | 2000-2014       | 12,725             | 0.7              | 0.0        | 0.0        | 12,638            | 2.1          | 0.0        | 12,375            | 99.0                           | 2.2                     | 0.0               | 0.0         |
| Iowa                               | 2000-2014       | 8,003              | 3.2              | 0.0        | 0.0        | 7,745             | 2.4          | 0.0        | 7,558             | 99.5                           | 1.8                     | 0.9               | 0.0         |
| Kentucky                           | 2000-2014       | 9,734              | 0.0              | 0.0        | 0.0        | 9,734             | 1.9          | 0.0        | 9,548             | 98.4                           | 2.5                     | 1.5               | 0.0         |
| Louisiana                          | 2000-2014       | 9,184              | 1.2              | 0.0        | 0.0        | 9,073             | 2.1          | 0.0        | 8,884             | 99.0                           | 3.3                     | 2.6               | 0.0         |
| Maine                              | 2000-2013       | 3,236              | 0.5              | 0.0        | 0.0        | 3,221             | 2.0          | 0.0        | 3,156             | 99.2                           | 2.1                     | 0.0               | 0.0         |
| Massachusetts                      | 2000-2009       | 8,165              | 0.1              | 0.0        | 0.0        | 8,153             | 6.3          | 0.0        | 7,637             | 97.9                           | 3.3                     | 0.0               | 0.0         |
| Michigan                           | 2000-2013       | 20,468             | 1.4              | 0.0        | 0.0        | 20,171            | 3.1          | 0.1        | 19,534            | 98.5                           | 3.4                     | 0.0               | 0.0         |

Web-table 2.14: Data quality indicators, patients diagnosed during 2000-2014, by continent, country and registry: MYELOID MALIGNANCIES (ADULTS)

|                     | Calendar period | Patients submitted | Ineligible (%) ¶ |            |            | Eligible patients | Excluded (%) |            | Patients included | Data quality indicators (%) †† |                         |                   |            |
|---------------------|-----------------|--------------------|------------------|------------|------------|-------------------|--------------|------------|-------------------|--------------------------------|-------------------------|-------------------|------------|
|                     |                 |                    | Incomplete dates | In situ    | Other      |                   | DCO          | Other      |                   | MV                             | Non-specific morphology | Lost to follow-up | Censored   |
| Detroit             | 2000-2014       | 10,036             | 3.6              | 0.0        | 0.0        | 9,670             | 2.5          | 0.0        | 9,430             | 99.5                           | 2.4                     | 2.3               | 0.0        |
| Minnesota           | 2000-2013       | 11,057             | 0.2              | 0.0        | 0.0        | 11,040            | 4.0          | 0.0        | 10,596            | 100.0                          | 1.7                     | 0.0               | 0.0        |
| Mississippi         | 2002-2014       | 4,447              | 1.0              | 0.0        | 0.0        | 4,402             | 4.1          | 0.0        | 4,220             | 98.5                           | 3.3                     | 0.0               | 0.0        |
| Missouri            | -               | -                  | -                | -          | -          | -                 | -            | -          | -                 | -                              | -                       | -                 | -          |
| Montana             | 2000-2014       | 2,587              | 6.0              | 0.0        | 0.0        | 2,433             | 5.3          | 0.0        | 2,305             | 99.5                           | 2.0                     | 0.0               | 0.0        |
| Nebraska            | 2000-2014       | 3,617              | 1.7              | 0.0        | 0.0        | 3,554             | 2.0          | 0.0        | 3,481             | 98.7                           | 2.7                     | 0.0               | 0.0        |
| New Hampshire       | 2000-2014       | 2,870              | 0.6              | 0.0        | 0.0        | 2,854             | 1.8          | 0.0        | 2,804             | 99.0                           | 2.6                     | 0.0               | 0.1        |
| New Jersey          | 2000-2014       | 19,971             | 3.7              | 0.0        | 0.0        | 19,233            | 1.5          | 0.0        | 18,952            | 99.2                           | 2.5                     | 19.5              | 0.0        |
| New Mexico          | 2000-2014       | 3,612              | 0.2              | 0.0        | 0.0        | 3,604             | 3.3          | 0.0        | 3,484             | 99.0                           | 3.4                     | 4.2               | 0.2        |
| New York            | 2000-2014       | 48,855             | 11.8             | 0.0        | 0.0        | 43,111            | 2.4          | 0.0        | 42,074            | 99.1                           | 2.0                     | 0.0               | 0.0        |
| New York City       | 2000-2014       | 15,735             | 12.5             | 0.0        | 0.0        | 13,763            | 1.7          | 0.0        | 13,522            | 99.3                           | 2.3                     | 0.0               | 0.0        |
| North Carolina      | 2000-2014       | 16,924             | 0.0              | 0.0        | 0.0        | 16,924            | 4.2          | 0.0        | 16,214            | 99.3                           | 2.2                     | 0.0               | 0.0        |
| Ohio                | 2000-2014       | 20,176             | 0.2              | 0.0        | 0.0        | 20,136            | 6.5          | 0.0        | 18,836            | 98.2                           | 4.9                     | 0.0               | 0.0        |
| Oklahoma            | 2000-2010       | 4,945              | 0.9              | 0.0        | 0.0        | 4,899             | 1.8          | 0.0        | 4,809             | 98.8                           | 12.9                    | 0.0               | 0.0        |
| Oregon              | 2000-2013       | 5,817              | 0.2              | 0.0        | 0.0        | 5,807             | 4.3          | 0.0        | 5,556             | 98.6                           | 3.7                     | 0.0               | 0.0        |
| Pennsylvania        | 2000-2014       | 33,319             | 3.2              | 0.0        | 0.0        | 32,269            | 4.8          | 0.0        | 30,736            | 99.1                           | 2.3                     | 0.0               | 0.0        |
| Rhode Island        | 2000-2014       | 2,227              | 0.4              | 0.0        | 0.0        | 2,219             | 3.1          | 0.0        | 2,151             | 98.5                           | 2.8                     | 0.0               | 0.0        |
| South Carolina      | 2000-2014       | 8,626              | 0.0              | 0.0        | 0.0        | 8,626             | 4.8          | 0.0        | 8,214             | 97.8                           | 3.7                     | 0.0               | 0.0        |
| Tennessee           | 2000-2011       | 7,869              | 1.1              | 0.0        | 0.0        | 7,785             | 6.8          | 0.0        | 7,258             | 99.2                           | 2.5                     | 0.0               | 0.0        |
| Texas               | 2000-2013       | 45,707             | 4.2              | 0.0        | 0.0        | 43,780            | 4.2          | 0.0        | 41,943            | 98.3                           | 4.1                     | 0.0               | 0.0        |
| Utah                | 2000-2014       | 3,412              | 1.4              | 0.0        | 0.0        | 3,364             | 0.5          | 0.0        | 3,348             | 99.4                           | 2.4                     | 3.6               | 0.0        |
| Vermont             | 2000-2013       | 1,101              | 0.1              | 0.0        | 0.0        | 1,100             | 1.5          | 0.0        | 1,084             | 99.5                           | 1.3                     | 0.0               | 0.0        |
| Washington          | 2000-2008       | 8,088              | 2.2              | 0.0        | 0.0        | 7,909             | 2.1          | 0.0        | 7,744             | 99.5                           | 1.9                     | 0.0               | 0.0        |
| Seattle             | 2000-2014       | 10,700             | 1.9              | 0.0        | 0.0        | 10,495            | 1.4          | 0.0        | 10,350            | 99.6                           | 1.4                     | 1.2               | 0.0        |
| West Virginia       | 2000-2014       | 4,315              | 1.5              | 0.0        | 0.0        | 4,250             | 2.6          | 0.0        | 4,140             | 98.8                           | 3.3                     | 0.0               | 0.0        |
| Wisconsin           | 2000-2013       | 13,067             | 1.9              | 0.0        | 0.0        | 12,819            | 4.7          | 0.0        | 12,216            | 99.3                           | 2.3                     | 0.0               | 0.0        |
| Wyoming             | 2000-2013       | 749                | 0.9              | 0.0        | 0.0        | 742               | 0.5          | 0.0        | 738               | 98.4                           | 3.0                     | 0.0               | 0.0        |
| <b>ASIA</b>         |                 | <b>144,985</b>     | <b>0.7</b>       | <b>0.0</b> | <b>0.6</b> | <b>143,198</b>    | <b>1.9</b>   | <b>0.2</b> | <b>140,066</b>    | <b>98.3</b>                    | <b>9.0</b>              | <b>0.5</b>        | <b>1.1</b> |
| Chinese registries  | 2003-2013       | 12,334             | 0.4              | 0.0        | 0.3        | 12,242            | 0.5          | 0.0        | 12,171            | 98.2                           | 36.3                    | 3.4               | 0.2        |
| Beijing             | 2003-2013       | 5,179              | 0.0              | 0.0        | 0.8        | 5,136             | 0.0          | 0.0        | 5,134             | 100.0                          | 15.2                    | 5.4               | 0.3        |
| Changle             | 2003-2013       | 159                | 3.1              | 0.0        | 0.0        | 154               | 4.5          | 0.6        | 146               | 91.8                           | 58.9                    | 0.0               | 0.0        |
| Cixian              | 2003-2013       | 226                | 0.0              | 0.0        | 0.0        | 226               | 3.5          | 0.0        | 218               | 97.7                           | 50.5                    | 0.0               | 0.0        |
| Dafeng              | 2003-2013       | 299                | 0.0              | 0.0        | 0.0        | 299               | 0.0          | 0.0        | 299               | 96.0                           | 94.3                    | 0.0               | 0.0        |
| Dalian              | 2003-2013       | 886                | 0.0              | 0.0        | 0.0        | 886               | 0.1          | 0.0        | 885               | 99.8                           | 11.6                    | 0.0               | 0.1        |
| Donghai             | 2003-2013       | 544                | 0.2              | 0.0        | 0.0        | 543               | 3.5          | 0.0        | 524               | 99.8                           | 68.9                    | 5.5               | 0.0        |
| Feicheng            | 2003-2013       | 232                | 0.0              | 0.0        | 0.0        | 232               | 0.0          | 0.0        | 232               | 92.7                           | 69.4                    | 3.0               | 0.0        |
| Ganyu               | 2003-2013       | 316                | 0.0              | 0.0        | 0.3        | 315               | 0.0          | 0.0        | 315               | 91.4                           | 90.8                    | 1.9               | 0.6        |
| Guanyun             | 2004-2013       | 344                | 0.0              | 0.0        | 0.0        | 344               | 0.0          | 0.0        | 344               | 100.0                          | 55.5                    | 1.5               | 0.0        |
| Haimen              | 2003-2013       | 704                | 0.0              | 0.0        | 0.0        | 704               | 0.1          | 0.0        | 703               | 100.0                          | 36.4                    | 0.9               | 0.0        |
| Haining             | 2003-2013       | 394                | 0.0              | 0.0        | 0.0        | 394               | 3.0          | 0.5        | 380               | 100.0                          | 68.7                    | 2.1               | 0.0        |
| Jianhu              | 2003-2013       | 299                | 0.0              | 0.0        | 0.0        | 299               | 0.0          | 0.0        | 299               | 84.9                           | 80.9                    | 3.0               | 0.0        |
| Jiashan             | 2003-2013       | 185                | 0.0              | 0.0        | 0.0        | 185               | 0.0          | 0.0        | 185               | 100.0                          | 36.2                    | 0.0               | 0.0        |
| Jintan              | 2003-2013       | 187                | 0.0              | 0.5        | 0.0        | 186               | 2.2          | 0.0        | 182               | 99.5                           | 58.2                    | 6.0               | 0.0        |
| Lianyungang         | 2008-2013       | 231                | 0.0              | 0.0        | 0.0        | 231               | 1.3          | 0.0        | 228               | 89.5                           | 52.2                    | 13.2              | 0.9        |
| Linzhou             | 2003-2013       | 360                | 0.0              | 0.0        | 0.0        | 360               | 0.0          | 0.0        | 360               | 86.7                           | 80.8                    | 0.0               | 0.0        |
| Qidong              | 2003-2013       | 625                | 0.0              | 0.0        | 0.0        | 625               | 0.0          | 0.0        | 625               | 99.5                           | 52.5                    | 0.8               | 0.0        |
| Sihui               | 2003-2013       | 160                | 1.3              | 0.0        | 0.0        | 158               | 7.0          | 0.0        | 147               | 96.6                           | 49.7                    | 4.1               | 0.0        |
| Taixing             | 2003-2013       | 297                | 12.8             | 0.0        | 0.0        | 259               | 0.0          | 0.0        | 259               | 97.3                           | 88.0                    | 4.2               | 0.0        |
| Yangzhong           | 2003-2013       | 43                 | 0.0              | 0.0        | 0.0        | 43                | 0.0          | 0.0        | 43                | 90.7                           | 79.1                    | 0.0               | 0.0        |
| Zhongshan           | 2003-2013       | 664                | 0.0              | 0.0        | 0.2        | 663               | 0.0          | 0.0        | 663               | 99.4                           | 7.1                     | 0.0               | 0.0        |
| Cyprus *            | 2004-2014       | 834                | 1.6              | 0.0        | 0.0        | 821               | 32.4         | 0.0        | 555               | 100.0                          | 2.2                     | 0.0               | 17.5       |
| Hong Kong *         | -               | -                  | -                | -          | -          | -                 | -            | -          | -                 | -                              | -                       | -                 | -          |
| Indian registries   | 2000-2014       | 154                | 0.6              | 0.0        | 0.0        | 153               | 0.0          | 0.0        | 153               | 100.0                          | 19.6                    | 1.3               | 0.0        |
| Guwahati            | -               | -                  | -                | -          | -          | -                 | -            | -          | -                 | -                              | -                       | -                 | -          |
| Karunagappally      | 2000-2014       | 154                | 0.6              | 0.0        | 0.0        | 153               | 0.0          | 0.0        | 153               | 100.0                          | 19.6                    | 1.3               | 0.0        |
| Iran (Golestan)     | -               | -                  | -                | -          | -          | -                 | -            | -          | -                 | -                              | -                       | -                 | -          |
| Israel *            | 2000-2013       | 9,322              | 0.0              | 0.0        | 2.9        | 9,054             | 7.5          | 0.0        | 8,375             | 99.8                           | 5.0                     | 0.0               | 0.0        |
| Japanese registries | 2000-2014       | 40,164             | 1.0              | 0.0        | 0.9        | 39,405            | 3.9          | 0.0        | 37,845            | 99.4                           | 3.0                     | 0.0               | 1.5        |
| Aichi               | 2003-2013       | 7,593              | 0.4              | 0.0        | 0.0        | 7,566             | 1.0          | 0.0        | 7,487             | 99.6                           | 1.9                     | 0.0               | 1.5        |
| Akita               | 2010-2014       | 634                | 2.5              | 0.0        | 0.3        | 616               | 0.0          | 0.6        | 612               | 97.1                           | 5.2                     | 0.0               | 18.1       |
| Ehime               | 2007-2013       | 1,406              | 0.1              | 0.0        | 0.0        | 1,405             | 0.9          | 0.0        | 1,392             | 99.6                           | 3.1                     | 0.0               | 0.0        |
| Fukui               | 2003-2009       | 683                | 1.3              | 0.0        | 0.0        | 674               | 0.0          | 0.0        | 674               | 99.6                           | 2.7                     | 0.0               | 3.1        |
| Gunma               | 2003-2012       | 2,100              | 9.7              | 0.0        | 0.0        | 1,896             | 1.7          | 0.0        | 1,864             | 99.4                           | 3.8                     | 0.0               | 1.2        |
| Hiroshima           | 2004-2008       | 1,579              | 1.1              | 0.0        | 0.1        | 1,561             | 1.2          | 0.0        | 1,543             | 99.5                           | 3.8                     | 0.0               | 0.1        |
| Hyogo               | 2007-2012       | 3,878              | 0.7              | 0.0        | 0.0        | 3,852             | 1.9          | 0.0        | 3,779             | 99.6                           | 2.6                     | 0.0               | 0.4        |
| Ibaraki             | 2006-2012       | 2,105              | 0.6              | 0.0        | 0.0        | 2,093             | 1.7          | 0.0        | 2,058             | 99.6                           | 2.5                     | 0.0               | 0.7        |
| Kanagawa            | 2000-2013       | 3,582              | 0.0              | 0.0        | 0.0        | 3,581             | 5.3          | 0.0        | 3,391             | 99.8                           | 3.3                     | 0.0               | 0.0        |
| Miyagi              | 2000-2010       | 2,372              | 1.7              | 0.0        | 0.1        | 2,330             | 1.1          | 0.0        | 2,305             | 99.8                           | 4.3                     | 0.0               | 0.8        |
| Niigata             | 2000-2013       | 3,642              | 0.5              | 0.0        | 9.4        | 3,284             | 1.1          | 0.0        | 3,249             | 99.0                           | 3.9                     | 0.0               | 0.0        |
| Osaka               | 2000-2008       | 5,744              | 0.0              | 0.0        | 0.1        | 5,738             | 17.5         | 0.0        | 4,734             | 99.2                           | 2.6                     | 0.0               | 4.6        |
| Saga                | 2006-2013       | 873                | 0.1              | 0.0        | 0.0        | 872               | 0.3          | 0.0        | 869               | 99.7                           | 1.8                     | 0.0               | 0.0        |
| Tochigi             | 2006-2013       | 1,911              | 0.7              | 0.0        | 0.0        | 1,897             | 1.8          | 0.0        | 1,863             | 99.1                           | 3.8                     | 0.0               | 1.6        |
| Yamagata            | 2003-2013       | 1,487              | 1.1              | 0.0        | 0.0        | 1,470             | 0.5          | 0.0        | 1,462             | 99.0                           | 3.9                     | 0.0               | 0.5        |
| Yamanashi           | 2008-2012       | 575                | 0.9              | 0.0        | 0.0        | 570               | 1.2          | 0.0        | 563               | 99.5                           | 4.1                     | 0.0               | 0.4        |
| Jordan *            | 2000-2014       | 1,941              | 0.2              | 0.0        | 0.0        | 1,937             | 0.1          | 1.0        | 1,917             | 99.9                           | 8.5                     | 13.0              | 0.0        |
| Korea * ‡           | 2000-2014       | 42,518             | 0.5              | 0.0        | 0.0        | 42,322            | 0.0          | 0.0        | 42,322            | 95.5                           | 8.1                     | 0.0               | 0.0        |
| Kuwait *            | 2000-2013       | 350                | 0.0              | 0.0        | 0.6        | 348               | 0.6          | 0.0        | 346               | 98.8                           | 2.6                     | 0.9               | 0.0        |
| Malaysia (Penang)   | 2000-2013       | 525                | 0.2              | 0.0        | 0.0        | 524               | 2.5          | 1.3        | 504               | 98.4                           | 14.1                    | 0.0               | 12.5       |
| Mongolia *          | -               | -                  | -                | -          | -          | -                 | -            | -          | -                 | -                              | -                       | -                 | -          |
| Qatar *             | 2000-2014       | 491                | 0.0              | 0.0        | 0.2        | 490               | 0.2          | 0.0        | 489               | 99.8                           | 2.7                     | 0.0               | 62.0       |
| Singapore *         | 2000-2014       | 3,487              | 0.0              | 0.0        | 4.0        | 3,346             | 0.2          | 0.0        | 3,339             | 99.9                           | 2.9                     | 0.0               | 0.0        |
| Taiwan *            | 2000-2014       | 17,830             | 0.1              | 0.0        | 0.0        | 17,813            | 0.0          | 0.0        | 17,813            | 100.0                          | 2.1                     | 0.0               | 0.0        |

Web-table 2.14: Data quality indicators, patients diagnosed during 2000-2014, by continent, country and registry: MYELOID MALIGNANCIES (ADULTS)

|                                | Calendar period | Patients submitted | Ineligible (%) ¶ |            |            | Eligible patients | Excluded (%) ¶¶ |            | Patients included | Data quality indicators (%) †† |                         |                   |            |
|--------------------------------|-----------------|--------------------|------------------|------------|------------|-------------------|-----------------|------------|-------------------|--------------------------------|-------------------------|-------------------|------------|
|                                |                 |                    | Incomplete dates | In situ    | Other      |                   | DCO             | Other      |                   | MV                             | Non-specific morphology | Lost to follow-up | Censored   |
| Thai registries                | 2000-2014       | 5,568              | 0.0              | 0.0        | 0.3        | 5,554             | 1.3             | 5.5        | 5,177             | 99.8                           | 40.6                    | 0.0               | 2.8        |
| Bangkok                        | 2000-2012       | 2,600              | 0.0              | 0.0        | 0.5        | 2,586             | 0.0             | 11.8       | 2,282             | 100.0                          | 62.7                    | 0.0               | 0.0        |
| Khon Kaen                      | 2000-2014       | 964                | 0.0              | 0.0        | 0.0        | 964               | 0.0             | 0.0        | 964               | 99.8                           | 8.3                     | 0.0               | 3.3        |
| Lampang                        | 2000-2014       | 492                | 0.0              | 0.0        | 0.0        | 492               | 0.0             | 0.0        | 492               | 100.0                          | 28.5                    | 0.0               | 0.0        |
| Lamphun                        | 2000-2014       | 237                | 0.0              | 0.0        | 0.0        | 237               | 0.0             | 0.0        | 237               | 100.0                          | 19.4                    | 0.0               | 0.0        |
| Lopburi                        | 2000-2014       | 608                | 0.0              | 0.0        | 0.0        | 608               | 3.3             | 0.0        | 588               | 99.1                           | 50.9                    | 0.0               | 19.4       |
| Songkhla                       | 2000-2014       | 667                | 0.0              | 0.0        | 0.0        | 667               | 7.8             | 0.1        | 614               | 99.2                           | 17.6                    | 0.2               | 0.2        |
| Turkish registries             | 2000-2013       | 9,467              | 2.9              | 0.0        | 0.0        | 9,189             | 1.4             | 0.0        | 9,060             | 99.9                           | 3.6                     | 0.3               | 3.2        |
| Ankara                         | 2008-2012       | 1,965              | 0.1              | 0.0        | 0.0        | 1,964             | 0.0             | 0.0        | 1,964             | 100.0                          | 4.4                     | 0.0               | 0.8        |
| Antalya                        | 2006-2012       | 1,276              | 0.6              | 0.0        | 0.0        | 1,268             | 0.1             | 0.0        | 1,267             | 100.0                          | 1.4                     | 0.0               | 1.2        |
| Bursa                          | 2006-2012       | 875                | 3.1              | 0.0        | 0.0        | 848               | 1.8             | 0.0        | 833               | 99.9                           | 3.2                     | 0.0               | 0.0        |
| Edirne                         | 2006-2012       | 207                | 6.8              | 0.0        | 0.0        | 193               | 0.0             | 0.0        | 193               | 100.0                          | 3.1                     | 0.0               | 0.0        |
| Erzurum                        | 2006-2012       | 216                | 1.4              | 0.0        | 0.0        | 213               | 0.0             | 0.0        | 213               | 100.0                          | 0.5                     | 0.0               | 0.9        |
| Eskisehir                      | -               | -                  | -                | -          | -          | -                 | -               | -          | -                 | -                              | -                       | -                 | -          |
| Izmir                          | 2000-2013       | 3,851              | 5.7              | 0.0        | 0.0        | 3,632             | 3.1             | 0.0        | 3,520             | 99.9                           | 4.4                     | 0.0               | 7.1        |
| Samsun                         | 2006-2012       | 554                | 0.0              | 0.0        | 0.0        | 554               | 0.0             | 0.0        | 554               | 100.0                          | 2.5                     | 4.3               | 0.0        |
| Trabzon                        | 2006-2012       | 523                | 0.8              | 0.0        | 0.4        | 517               | 0.2             | 0.0        | 516               | 100.0                          | 4.1                     | 0.0               | 2.3        |
| <b>EUROPE</b>                  |                 | <b>475,999</b>     | <b>0.2</b>       | <b>0.0</b> | <b>3.1</b> | <b>460,187</b>    | <b>4.9</b>      | <b>0.2</b> | <b>436,684</b>    | <b>99.3</b>                    | <b>3.2</b>              | <b>0.6</b>        | <b>1.8</b> |
| Austria *                      | 2000-2014       | 8,327              | 0.0              | 0.0        | 2.2        | 8,146             | 10.7            | 0.6        | 7,223             | 99.4                           | 3.6                     | 0.0               | 0.0        |
| Belarus (Childhood) †          | -               | -                  | -                | -          | -          | -                 | -               | -          | -                 | -                              | -                       | -                 | -          |
| Belgium *                      | 2004-2014       | 19,793             | 0.0              | 0.0        | 0.0        | 19,790            | 0.0             | 0.0        | 19,790            | 100.0                          | 0.9                     | 1.0               | 0.0        |
| Bulgaria *                     | 2000-2014       | 7,507              | 0.0              | 0.0        | 0.0        | 7,507             | 17.1            | 0.0        | 6,226             | 100.0                          | 7.6                     | 0.3               | 0.0        |
| Croatia *                      | 2000-2014       | 5,483              | 0.0              | 0.0        | 0.3        | 5,466             | 8.0             | 0.0        | 5,026             | 96.1                           | 5.0                     | 0.0               | 0.0        |
| Czech Republic *               | 2000-2014       | 11,030             | 0.0              | 0.0        | 11.7       | 9,735             | 0.0             | 0.0        | 9,734             | 100.0                          | 4.4                     | 0.0               | 0.0        |
| Denmark *                      | 2000-2014       | 8,960              | 0.0              | 0.0        | 0.1        | 8,951             | 0.0             | 0.0        | 8,951             | 99.8                           | 1.6                     | 0.2               | 0.0        |
| Estonia *                      | 2000-2012       | 1,580              | 0.0              | 0.0        | 0.5        | 1,572             | 3.8             | 0.0        | 1,512             | 100.0                          | 2.0                     | 0.6               | 0.1        |
| Finland *                      | 2000-2014       | 7,665              | 3.2              | 0.0        | 0.1        | 7,416             | 24.9            | 0.0        | 5,573             | 99.9                           | 5.8                     | 0.0               | 0.0        |
| French registries              | 2000-2010       | 19,051             | 0.4              | 0.0        | 0.1        | 18,954            | 0.0             | 0.3        | 18,897            | 100.0                          | 0.8                     | 1.5               | 0.0        |
| Bas-Rhin                       | 2000-2010       | 1,745              | 0.0              | 0.0        | 0.1        | 1,743             | 0.0             | 0.1        | 1,741             | 100.0                          | 0.7                     | 1.5               | 0.0        |
| Basse Normandie                | 2002-2010       | 2,689              | 0.0              | 0.0        | 0.0        | 2,689             | 0.0             | 0.0        | 2,689             | 100.0                          | 0.7                     | 0.0               | 0.0        |
| Burgundy Digestive             | -               | -                  | -                | -          | -          | -                 | -               | -          | -                 | -                              | -                       | -                 | -          |
| Calvados                       | 2000-2002       | 160                | 0.0              | 0.0        | 0.0        | 160               | 0.0             | 0.0        | 160               | 100.0                          | 0.6                     | 0.0               | 0.0        |
| Calvados Digestive             | -               | -                  | -                | -          | -          | -                 | -               | -          | -                 | -                              | -                       | -                 | -          |
| Côte-d'Or Gynaecologic         | -               | -                  | -                | -          | -          | -                 | -               | -          | -                 | -                              | -                       | -                 | -          |
| Côte-d'Or Haematopoietic       | 2000-2010       | 1,066              | 0.0              | 0.0        | 0.0        | 1,066             | 0.0             | 0.0        | 1,066             | 100.0                          | 0.5                     | 0.2               | 0.0        |
| Doubs                          | 2000-2010       | 982                | 0.0              | 0.0        | 0.1        | 981               | 0.0             | 0.0        | 981               | 100.0                          | 0.2                     | 0.2               | 0.0        |
| Finistère                      | -               | -                  | -                | -          | -          | -                 | -               | -          | -                 | -                              | -                       | -                 | -          |
| Gironde CNS                    | -               | -                  | -                | -          | -          | -                 | -               | -          | -                 | -                              | -                       | -                 | -          |
| Gironde General                | -               | -                  | -                | -          | -          | -                 | -               | -          | -                 | -                              | -                       | -                 | -          |
| Gironde Haematopoietic         | 2002-2010       | 2,372              | 0.0              | 0.0        | 0.0        | 2,372             | 0.0             | 0.2        | 2,367             | 100.0                          | 0.5                     | 2.6               | 0.0        |
| Haut-Rhin                      | 2000-2010       | 1,075              | 0.1              | 0.0        | 0.1        | 1,073             | 0.0             | 0.2        | 1,071             | 100.0                          | 1.9                     | 1.5               | 0.0        |
| Haute-Vienne                   | 2009-2009       | 120                | 0.0              | 0.0        | 0.0        | 120               | 0.0             | 0.0        | 120               | 100.0                          | 0.0                     | 0.8               | 0.0        |
| Hérault                        | 2000-2010       | 1,825              | 0.0              | 0.0        | 0.2        | 1,822             | 0.0             | 0.9        | 1,806             | 100.0                          | 0.3                     | 3.0               | 0.0        |
| Isère                          | 2000-2010       | 1,829              | 0.0              | 0.0        | 0.1        | 1,827             | 0.0             | 0.7        | 1,814             | 100.0                          | 0.8                     | 0.7               | 0.0        |
| Lille Metro                    | 2008-2010       | 391                | 0.0              | 0.0        | 0.0        | 391               | 0.0             | 0.0        | 391               | 100.0                          | 0.3                     | 0.5               | 0.0        |
| Loire-Atlantique               | 2000-2010       | 2,719              | 3.1              | 0.0        | 0.1        | 2,633             | 0.0             | 0.6        | 2,616             | 100.0                          | 1.1                     | 2.3               | 0.0        |
| Manche                         | 2000-2001       | 154                | 0.0              | 0.0        | 0.0        | 154               | 0.0             | 0.6        | 153               | 100.0                          | 3.3                     | 2.0               | 0.0        |
| Somme                          | 2000-2010       | 1,012              | 0.0              | 0.0        | 0.0        | 1,012             | 0.0             | 0.1        | 1,011             | 100.0                          | 2.0                     | 2.8               | 0.0        |
| Tarn                           | 2000-2010       | 912                | 0.0              | 0.0        | 0.1        | 911               | 0.0             | 0.0        | 911               | 100.0                          | 1.1                     | 1.8               | 0.0        |
| France Childhood Haem †        | -               | -                  | -                | -          | -          | -                 | -               | -          | -                 | -                              | -                       | -                 | -          |
| France Childhood Solid †       | -               | -                  | -                | -          | -          | -                 | -               | -          | -                 | -                              | -                       | -                 | -          |
| German registries              | 2000-2014       | 57,700             | 0.6              | 0.0        | 1.4        | 56,559            | 18.8            | 0.0        | 45,934            | 99.5                           | 2.1                     | 0.4               | 15.7       |
| Brandenburg                    | 2000-2014       | 5,173              | 0.0              | 0.0        | 0.0        | 5,171             | 24.6            | 0.0        | 3,897             | 99.6                           | 2.4                     | 0.0               | 19.7       |
| Bremen                         | 2000-2013       | 1,529              | 0.0              | 0.0        | 2.3        | 1,494             | 14.3            | 0.0        | 1,280             | 99.7                           | 0.9                     | 2.7               | 0.0        |
| Hamburg                        | 2000-2013       | 3,692              | 0.0              | 0.0        | 0.7        | 3,665             | 7.1             | 0.0        | 3,402             | 99.9                           | 1.6                     | 3.8               | 0.0        |
| Lower Saxony                   | 2003-2013       | 15,489             | 2.1              | 0.0        | 0.0        | 15,161            | 25.0            | 0.0        | 11,378            | 99.0                           | 2.3                     | 0.0               | 20.5       |
| Mecklenburg-W. Pomerania       | 2000-2014       | 3,755              | 0.0              | 0.0        | 0.1        | 3,753             | 16.3            | 0.0        | 3,142             | 99.7                           | 1.9                     | 0.0               | 20.1       |
| Rhineland Palatinate           | 2000-2013       | 4,770              | 0.0              | 0.0        | 0.6        | 4,742             | 0.0             | 0.0        | 4,741             | 99.6                           | 1.7                     | 0.0               | 18.1       |
| Saarland                       | 2000-2012       | 1,620              | 0.0              | 0.0        | 35.5       | 1,045             | 10.6            | 0.0        | 934               | 98.9                           | 2.9                     | 0.0               | 0.0        |
| Saxony                         | 2000-2014       | 10,915             | 0.0              | 0.0        | 0.1        | 10,908            | 13.9            | 0.0        | 9,388             | 99.6                           | 2.7                     | 0.0               | 19.7       |
| Schleswig-Holstein             | 2000-2012       | 5,457              | 0.0              | 0.0        | 2.5        | 5,322             | 31.1            | 0.0        | 3,667             | 99.6                           | 0.9                     | 0.0               | 0.1        |
| Thuringia                      | 2000-2014       | 5,300              | 0.0              | 0.0        | 0.0        | 5,298             | 22.5            | 0.0        | 4,105             | 99.8                           | 1.8                     | 0.0               | 19.0       |
| Gibraltar *                    | 2000-2006       | 6                  | 16.7             | 0.0        | 16.7       | 4                 | 0.0             | 0.0        | 4                 | 100.0                          | 0.0                     | 0.0               | 25.0       |
| Greece (National Paediatric) † | -               | -                  | -                | -          | -          | -                 | -               | -          | -                 | -                              | -                       | -                 | -          |
| Iceland *                      | 2000-2014       | 437                | 0.0              | 0.0        | 0.0        | 437               | 0.9             | 0.0        | 433               | 100.0                          | 0.5                     | 0.0               | 0.0        |
| Ireland *                      | 2000-2013       | 6,681              | 0.0              | 0.0        | 4.1        | 6,404             | 2.4             | 0.0        | 6,250             | 99.5                           | 5.6                     | 0.0               | 0.0        |
| Italian registries             | 2000-2014       | 50,129             | 0.0              | 0.0        | 0.2        | 50,039            | 0.8             | 0.0        | 49,653            | 97.4                           | 5.3                     | 0.6               | 1.0        |
| Alto Adige                     | 2000-2010       | 759                | 0.0              | 0.0        | 0.1        | 758               | 0.4             | 0.0        | 755               | 99.9                           | 0.9                     | 0.0               | 0.0        |
| Barletta-Andria-Trani          | 2006-2012       | 670                | 0.0              | 0.0        | 0.1        | 669               | 1.0             | 0.0        | 662               | 98.3                           | 1.8                     | 0.8               | 0.2        |
| Basilicata                     | 2006-2010       | 797                | 0.0              | 0.0        | 0.0        | 797               | 0.0             | 0.0        | 797               | 96.4                           | 4.8                     | 0.4               | 0.4        |
| Bergamo                        | 2007-2012       | 768                | 0.0              | 0.0        | 0.0        | 768               | 0.1             | 0.0        | 767               | 98.4                           | 3.3                     | 0.5               | 0.0        |
| Biella-Vercelli                | 2000-2010       | 756                | 0.0              | 0.0        | 2.4        | 738               | 1.2             | 0.0        | 729               | 100.0                          | 1.2                     | 0.3               | 1.9        |
| Brescia                        | 2000-2008       | 700                | 0.0              | 0.0        | 0.1        | 699               | 0.0             | 0.0        | 699               | 97.3                           | 12.9                    | 0.6               | 0.1        |
| Brindisi                       | 2006-2008       | 226                | 0.0              | 0.0        | 0.0        | 226               | 0.0             | 0.0        | 226               | 92.0                           | 8.0                     | 0.9               | 2.2        |
| Caserta                        | 2008-2010       | 472                | 0.0              | 0.0        | 0.0        | 472               | 0.0             | 0.0        | 472               | 86.7                           | 15.9                    | 0.4               | 5.7        |
| Catania-Messina-Enna           | 2003-2012       | 3,139              | 0.0              | 0.0        | 0.1        | 3,137             | 2.1             | 0.0        | 3,072             | 97.9                           | 5.9                     | 0.0               | 2.1        |
| Catanzaro                      | 2003-2009       | 438                | 0.0              | 0.0        | 0.0        | 438               | 0.0             | 0.0        | 438               | 96.1                           | 5.0                     | 0.0               | 0.2        |
| Como                           | 2003-2011       | 730                | 0.0              | 0.0        | 0.0        | 730               | 0.3             | 0.0        | 728               | 98.9                           | 4.0                     | 0.4               | 0.0        |
| Cremona                        | 2005-2010       | 368                | 0.0              | 0.0        | 0.0        | 368               | 1.1             | 0.0        | 364               | 91.8                           | 9.9                     | 1.6               | 0.0        |
| Ferrara                        | 2000-2011       | 944                | 0.0              | 0.0        | 0.0        | 944               | 0.0             | 0.0        | 944               | 99.8                           | 1.7                     | 1.0               | 0.0        |
| Friuli-Venezia-Giulia          | 2000-2010       | 1,011              | 0.0              | 0.0        | 0.1        | 1,010             | 5.6             | 0.0        | 953               | 100.0                          | 2.3                     | 0.3               | 0.0        |
| Genoa                          | 2000-2009       | 2,163              | 0.0              | 0.0        | 1.1        | 2,140             | 0.0             | 0.0        | 2,139             | 98.6                           | 3.9                     | 0.0               | 0.0        |
| Latina                         | 2000-2011       | 845                | 0.0              | 0.0        | 0.0        | 845               | 0.0             | 0.0        | 845               | 98.6                           | 2.6                     | 1.7               | 1.3        |
| Lecce                          | 2003-2008       | 798                | 0.0              | 0.0        | 0.1        | 797               | 0.0             | 0.0        | 797               | 95.2                           | 5.9                     | 0.4               | 0.9        |

Web-table 2.14: Data quality indicators, patients diagnosed during 2000-2014, by continent, country and registry: MYELOID MALIGNANCIES (ADULTS)

|                      | Calendar period | Patients submitted | Ineligible (%) ¶ |         |       | Eligible patients | Excluded (%) ¶¶ |       | Patients included | Data quality indicators (%) †† |                         |                   |          |
|----------------------|-----------------|--------------------|------------------|---------|-------|-------------------|-----------------|-------|-------------------|--------------------------------|-------------------------|-------------------|----------|
|                      |                 |                    | Incomplete dates | In situ | Other |                   | DCO             | Other |                   | MV                             | Non-specific morphology | Lost to follow-up | Censored |
| Mantova              | 2000-2010       | 377                | 0.0              | 0.0     | 0.0   | 377               | 2.4             | 0.0   | 368               | 97.8                           | 8.2                     | 0.3               | 0.0      |
| Milano               | 2000-2012       | 4,090              | 0.0              | 0.0     | 0.0   | 4,089             | 0.0             | 0.0   | 4,087             | 99.4                           | 3.1                     | 2.2               | 0.4      |
| Modena               | 2000-2012       | 1,499              | 0.0              | 0.0     | 0.5   | 1,492             | 0.0             | 0.0   | 1,492             | 99.2                           | 1.4                     | 0.0               | 1.0      |
| Monza-Brianza        | 2007-2012       | 841                | 0.0              | 0.0     | 0.0   | 841               | 0.0             | 0.0   | 841               | 96.0                           | 6.1                     | 1.1               | 0.0      |
| Naples               | 2000-2012       | 1,277              | 0.0              | 0.0     | 0.0   | 1,277             | 0.0             | 0.0   | 1,277             | 89.9                           | 11.9                    | 2.1               | 1.9      |
| Nuoro                | 2003-2012       | 420                | 0.0              | 0.0     | 0.0   | 420               | 0.2             | 0.0   | 419               | 99.8                           | 1.2                     | 0.0               | 0.2      |
| Palermo              | 2003-2012       | 1,683              | 0.0              | 0.0     | 0.0   | 1,683             | 2.9             | 0.0   | 1,635             | 88.7                           | 13.3                    | 0.2               | 0.0      |
| Parma                | 2000-2014       | 1,401              | 0.0              | 0.0     | 0.1   | 1,399             | 0.1             | 0.0   | 1,397             | 100.0                          | 1.6                     | 1.1               | 0.2      |
| Pavia                | 2003-2009       | 294                | 0.0              | 0.0     | 0.0   | 294               | 0.3             | 0.0   | 293               | 96.6                           | 6.8                     | 0.3               | 0.3      |
| Piacenza             | 2006-2011       | 436                | 0.0              | 0.0     | 0.0   | 436               | 0.0             | 0.0   | 436               | 98.2                           | 2.1                     | 0.0               | 2.1      |
| Ragusa               | 2000-2012       | 993                | 0.0              | 0.0     | 0.9   | 984               | 1.5             | 0.0   | 969               | 99.8                           | 5.8                     | 0.0               | 0.0      |
| Reggio Emilia        | 2000-2012       | 1,131              | 0.0              | 0.0     | 0.0   | 1,131             | 0.0             | 0.0   | 1,131             | 99.1                           | 1.9                     | 1.3               | 0.0      |
| Romagna              | 2000-2012       | 3,413              | 0.0              | 0.0     | 0.1   | 3,408             | 0.1             | 0.0   | 3,404             | 96.8                           | 5.4                     | 0.1               | 0.0      |
| Salerno              | 2000-2009       | 1,499              | 0.0              | 0.0     | 0.0   | 1,499             | 0.0             | 0.0   | 1,499             | 97.0                           | 6.5                     | 0.3               | 4.7      |
| Sassari              | 2000-2011       | 663                | 0.0              | 0.0     | 0.0   | 663               | 0.6             | 0.0   | 659               | 99.8                           | 2.1                     | 0.0               | 0.0      |
| Siracusa             | 2000-2012       | 586                | 0.0              | 0.0     | 0.0   | 586               | 1.7             | 0.0   | 576               | 84.5                           | 20.8                    | 0.0               | 0.9      |
| Sondrio              | 2000-2011       | 183                | 0.0              | 0.0     | 0.0   | 183               | 0.0             | 0.0   | 183               | 98.9                           | 1.1                     | 0.0               | 0.0      |
| Taranto              | 2006-2012       | 797                | 0.0              | 0.0     | 0.0   | 797               | 5.0             | 0.0   | 757               | 97.8                           | 2.4                     | 1.2               | 0.0      |
| Trapani              | 2002-2010       | 547                | 0.0              | 0.0     | 0.0   | 547               | 1.5             | 0.0   | 539               | 100.0                          | 3.2                     | 0.4               | 0.7      |
| Trento               | 2000-2010       | 486                | 0.0              | 0.0     | 0.2   | 485               | 0.4             | 0.0   | 483               | 98.3                           | 7.0                     | 0.8               | 0.0      |
| Turin                | 2000-2012       | 1,902              | 0.0              | 0.0     | 0.0   | 1,902             | 0.9             | 0.0   | 1,885             | 100.0                          | 2.3                     | 1.3               | 0.0      |
| Tuscany              | 2000-2009       | 2,643              | 0.0              | 0.0     | 0.5   | 2,631             | 1.3             | 0.0   | 2,596             | 94.9                           | 8.0                     | 0.0               | 2.6      |
| Umbria               | 2000-2013       | 2,668              | 0.0              | 0.0     | 0.1   | 2,666             | 0.2             | 0.0   | 2,662             | 99.5                           | 6.1                     | 0.1               | 0.2      |
| Varese               | 2000-2012       | 936                | 0.0              | 0.0     | 0.0   | 936               | 0.4             | 0.0   | 932               | 95.6                           | 9.5                     | 0.3               | 0.0      |
| Veneto               | 2000-2009       | 3,397              | 0.0              | 0.0     | 0.1   | 3,394             | 0.7             | 0.0   | 3,369             | 98.3                           | 4.4                     | 0.5               | 1.0      |
| Viterbo              | 2006-2010       | 383                | 0.0              | 0.0     | 0.0   | 383               | 1.6             | 0.0   | 377               | 93.9                           | 6.4                     | 0.3               | 26.0     |
| Piedmont Childhood   | -               | -                  | -                | -       | -     | -                 | -               | -     | -                 | -                              | -                       | -                 | -        |
| Latvia *             | 2000-2014       | 1,762              | 0.0              | 0.0     | 0.1   | 1,760             | 0.0             | 0.6   | 1,749             | 90.8                           | 18.1                    | 0.0               | 0.0      |
| Lithuania *          | 2000-2012       | 4,904              | 0.0              | 0.0     | 1.1   | 4,850             | 0.0             | 0.0   | 4,850             | 100.0                          | 3.4                     | 0.0               | 0.3      |
| Malta *              | 2000-2013       | 528                | 0.0              | 0.0     | 0.0   | 528               | 6.8             | 0.0   | 492               | 99.6                           | 2.2                     | 0.0               | 0.0      |
| Netherlands *        | 2000-2014       | 30,629             | 0.0              | 0.0     | 0.0   | 30,629            | 0.1             | 1.1   | 30,256            | 100.0                          | 0.5                     | 0.5               | 0.0      |
| Norway *             | 2000-2014       | 9,021              | 0.0              | 0.0     | 4.0   | 8,663             | 3.3             | 0.0   | 8,374             | 99.7                           | 2.6                     | 0.2               | 0.0      |
| Poland *             | 2000-2014       | 21,098             | 0.0              | 0.0     | 0.2   | 21,065            | 0.0             | 0.3   | 21,008            | 100.0                          | 10.1                    | 0.0               | 0.0      |
| Greater Poland       | 2000-2014       | 1,914              | 0.0              | 0.0     | 0.2   | 1,910             | 0.0             | 0.4   | 1,902             | 100.0                          | 11.2                    | 0.0               | 0.0      |
| Holy Cross           | 2000-2014       | 1,101              | 0.0              | 0.0     | 0.3   | 1,098             | 0.0             | 0.2   | 1,096             | 100.0                          | 5.2                     | 0.0               | 0.0      |
| Kujavia-Pomerania    | 2000-2014       | 1,177              | 0.0              | 0.0     | 0.3   | 1,174             | 0.0             | 0.4   | 1,169             | 100.0                          | 16.5                    | 0.0               | 0.0      |
| Lesser Poland        | 2000-2014       | 1,532              | 0.0              | 0.0     | 0.3   | 1,528             | 0.0             | 0.3   | 1,524             | 100.0                          | 13.3                    | 0.0               | 0.0      |
| Łódź                 | 2000-2014       | 1,931              | 0.0              | 0.0     | 0.1   | 1,930             | 0.0             | 0.8   | 1,914             | 100.0                          | 6.9                     | 0.0               | 0.0      |
| Lower Silesia        | 2000-2014       | 1,722              | 0.0              | 0.0     | 0.2   | 1,719             | 0.1             | 0.0   | 1,718             | 100.0                          | 12.0                    | 0.3               | 0.0      |
| Lublin               | 2000-2014       | 1,413              | 0.0              | 0.0     | 0.1   | 1,412             | 0.0             | 0.3   | 1,408             | 100.0                          | 10.8                    | 0.0               | 0.0      |
| Lubush               | 2000-2014       | 501                | 0.0              | 0.0     | 0.2   | 500               | 0.0             | 0.8   | 496               | 100.0                          | 8.9                     | 0.0               | 0.0      |
| Mazovia              | 2000-2014       | 1,886              | 0.0              | 0.0     | 0.2   | 1,882             | 0.0             | 0.1   | 1,881             | 100.0                          | 7.0                     | 0.0               | 0.0      |
| Opole                | 2000-2014       | 511                | 0.0              | 0.0     | 0.2   | 510               | 0.0             | 0.0   | 510               | 100.0                          | 6.9                     | 0.0               | 0.0      |
| Podlaha              | 2000-2014       | 627                | 0.0              | 0.0     | 0.2   | 626               | 0.0             | 0.2   | 625               | 100.0                          | 13.1                    | 0.0               | 0.0      |
| Pomerania            | 2000-2014       | 1,392              | 0.0              | 0.0     | 0.1   | 1,391             | 0.0             | 0.1   | 1,389             | 100.0                          | 10.9                    | 0.0               | 0.0      |
| Silesia              | 2000-2014       | 2,696              | 0.0              | 0.0     | 0.1   | 2,694             | 0.0             | 0.1   | 2,692             | 100.0                          | 7.6                     | 0.0               | 0.0      |
| Subcarpathia         | 2000-2014       | 1,424              | 0.0              | 0.0     | 0.1   | 1,423             | 0.0             | 0.4   | 1,418             | 100.0                          | 10.4                    | 0.0               | 0.0      |
| Varmia-Mazuria       | 2000-2014       | 553                | 0.0              | 0.0     | 0.2   | 552               | 0.0             | 0.2   | 551               | 100.0                          | 14.0                    | 0.0               | 0.2      |
| West Pomerania       | 2000-2014       | 718                | 0.0              | 0.0     | 0.3   | 716               | 0.0             | 0.1   | 715               | 100.0                          | 13.1                    | 0.0               | 0.0      |
| Portugal *           | 2000-2014       | 9,604              | 0.3              | 0.0     | 1.6   | 9,420             | 0.1             | 0.0   | 9,414             | 99.7                           | 5.0                     | 1.9               | 0.1      |
| Azores               | 2000-2014       | 373                | 0.0              | 0.0     | 1.3   | 368               | 1.4             | 0.0   | 363               | 98.6                           | 3.6                     | 0.6               | 1.4      |
| Portugal Central     | 2003-2010       | 1,000              | 1.6              | 0.0     | 0.1   | 983               | 0.0             | 0.0   | 983               | 98.7                           | 5.6                     | 0.6               | 0.0      |
| Portugal North       | 2000-2010       | 1,932              | 0.7              | 0.0     | 0.0   | 1,919             | 0.0             | 0.0   | 1,919             | 99.6                           | 3.5                     | 0.1               | 0.1      |
| Portugal South       | 2000-2014       | 6,299              | 0.1              | 0.0     | 2.3   | 6,150             | 0.0             | 0.0   | 6,149             | 100.0                          | 5.4                     | 2.8               | 0.0      |
| Romania (Cluj)       | 2006-2012       | 491                | 0.0              | 0.0     | 1.6   | 483               | 0.2             | 0.0   | 482               | 98.3                           | 8.7                     | 0.0               | 0.0      |
| Russian registries ‡ | 2000-2014       | 3,269              | 0.0              | 0.0     | 0.0   | 3,269             | 2.2             | 0.2   | 3,190             | 98.3                           | 20.5                    | 2.0               | 0.7      |
| Arkhangelsk          | 2000-2014       | 615                | 0.0              | 0.0     | 0.0   | 615               | 0.3             | 0.3   | 611               | 100.0                          | 22.3                    | 0.7               | 0.0      |
| Karelia              | 2000-2014       | 621                | 0.0              | 0.0     | 0.0   | 621               | 4.5             | 0.0   | 593               | 91.1                           | 68.1                    | 1.2               | 3.5      |
| Omsk                 | -               | -                  | -                | -       | -     | -                 | -               | -     | -                 | -                              | -                       | -                 | -        |
| Samara               | 2000-2014       | 2,033              | 0.0              | 0.0     | 0.0   | 2,033             | 2.1             | 0.2   | 1,986             | 99.9                           | 5.8                     | 2.7               | 0.0      |
| Tomsk                | -               | -                  | -                | -       | -     | -                 | -               | -     | -                 | -                              | -                       | -                 | -        |
| Slovakia *           | 2000-2010       | 5,206              | 0.0              | 0.0     | 0.7   | 5,167             | 13.5            | 0.1   | 4,466             | 100.0                          | 2.2                     | 0.0               | 0.0      |
| Slovenia *           | 2000-2013       | 3,043              | 0.0              | 0.0     | 0.0   | 3,043             | 0.6             | 0.0   | 3,026             | 100.0                          | 2.1                     | 0.1               | 0.0      |
| Spanish registries   | 2000-2013       | 13,915             | 0.5              | 0.0     | 0.1   | 13,836            | 2.5             | 0.0   | 13,483            | 98.4                           | 4.1                     | 0.4               | 0.0      |
| Basque Country       | 2000-2013       | 4,396              | 0.0              | 0.0     | 0.0   | 4,395             | 1.5             | 0.0   | 4,329             | 97.0                           | 6.9                     | 0.5               | 0.0      |
| Canaries             | 2000-2011       | 1,569              | 0.0              | 0.0     | 0.0   | 1,569             | 3.6             | 0.0   | 1,513             | 98.4                           | 4.2                     | 0.3               | 0.0      |
| Girona               | 2000-2013       | 1,719              | 2.5              | 0.0     | 0.2   | 1,673             | 3.4             | 0.0   | 1,616             | 99.9                           | 1.1                     | 0.7               | 0.0      |
| Granada              | 2000-2012       | 1,126              | 0.0              | 0.0     | 0.0   | 1,126             | 4.0             | 0.0   | 1,081             | 100.0                          | 1.6                     | 0.2               | 0.0      |
| Mallorca             | 2000-2012       | 1,441              | 1.1              | 0.0     | 0.6   | 1,416             | 2.8             | 0.0   | 1,376             | 99.7                           | 1.1                     | 0.9               | 0.0      |
| Murcia               | 2000-2010       | 1,742              | 0.0              | 0.0     | 0.0   | 1,742             | 1.2             | 0.1   | 1,720             | 97.1                           | 4.5                     | 0.0               | 0.1      |
| Navarra              | 2000-2010       | 716                | 0.0              | 0.0     | 0.0   | 716               | 2.5             | 0.0   | 698               | 98.7                           | 5.0                     | 0.0               | 0.0      |
| Tarragona            | 2000-2011       | 1,206              | 0.5              | 0.0     | 0.1   | 1,199             | 4.1             | 0.0   | 1,150             | 99.8                           | 2.6                     | 0.0               | 0.1      |
| Spain Childhood      | -               | -                  | -                | -       | -     | -                 | -               | -     | -                 | -                              | -                       | -                 | -        |
| Valencia Childhood   | -               | -                  | -                | -       | -     | -                 | -               | -     | -                 | -                              | -                       | -                 | -        |
| Sweden *             | 2000-2014       | 17,021             | 0.0              | 0.0     | 15.8  | 14,334            | 0.4             | 0.0   | 14,280            | 99.9                           | 1.9                     | 0.1               | 0.0      |
| Swiss registries     | 2000-2014       | 7,385              | 0.0              | 0.0     | 1.0   | 7,308             | 1.4             | 0.5   | 7,175             | 100.0                          | 1.3                     | 3.3               | 3.1      |
| Basel                | 2000-2011       | 219                | 0.0              | 0.0     | 0.0   | 219               | 0.9             | 12.3  | 190               | 100.0                          | 2.1                     | 0.5               | 6.3      |
| Fribourg             | 2006-2014       | 325                | 0.0              | 0.0     | 1.8   | 319               | 0.0             | 2.2   | 312               | 100.0                          | 0.6                     | 1.6               | 0.0      |
| Geneva               | 2000-2013       | 979                | 0.0              | 0.0     | 1.1   | 968               | 1.8             | 0.0   | 951               | 100.0                          | 0.9                     | 3.0               | 0.0      |
| Graubünden-Glarus    | 2000-2014       | 526                | 0.0              | 0.0     | 0.0   | 526               | 0.0             | 0.0   | 526               | 100.0                          | 1.3                     | 26.4              | 0.0      |
| Neuchâtel            | 2000-2014       | 291                | 0.0              | 0.0     | 3.1   | 282               | 1.1             | 0.0   | 279               | 100.0                          | 3.9                     | 1.1               | 1.1      |
| St Gallen-Appenzell  | 2000-2014       | 954                | 0.0              | 0.0     | 0.0   | 954               | 0.0             | 0.0   | 954               | 100.0                          | 1.4                     | 2.7               | 0.0      |
| Ticino               | 2000-2014       | 778                | 0.0              | 0.0     | 0.0   | 778               | 1.9             | 0.0   | 763               | 100.0                          | 1.7                     | 1.2               | 0.0      |
| Valais               | 2000-2014       | 693                | 0.0              | 0.0     | 6.2   | 650               | 0.8             | 0.0   | 645               | 99.8                           | 2.2                     | 0.8               | 0.0      |

Web-table 2.14: Data quality indicators, patients diagnosed during 2000-2014, by continent, country and registry: MYELOID MALIGNANCIES (ADULTS)

|                              | Calendar period | Patients submitted | Ineligible (%) ¶ |            |            | Eligible patients | Excluded (%) |            | Patients included | Data quality indicators (%) †† |                         |                   |            |
|------------------------------|-----------------|--------------------|------------------|------------|------------|-------------------|--------------|------------|-------------------|--------------------------------|-------------------------|-------------------|------------|
|                              |                 |                    | Incomplete dates | In situ    | Other      |                   | DCO          | Other      |                   | MV                             | Non-specific morphology | Lost to follow-up | Censored   |
| Zürich                       | 2000-2013       | 2,620              | 0.0              | 0.0        | 0.3        | 2,612             | 2.2          | 0.0        | 2,555             | 100.0                          | 0.8                     | 0.8               | 8.3        |
| Switzerland (Childhood) †    | -               | -                  |                  |            |            |                   |              |            |                   |                                |                         |                   |            |
| United Kingdom *             | 2000-2014       | 143,774            | 0.2              | 0.0        | 6.0        | 134,852           | 4.0          | 0.1        | 129,233           | 99.4                           | 2.0                     | 0.7               | 0.0        |
| England                      | 2000-2014       | 116,827            | 0.3              | 0.0        | 0.1        | 116,397           | 4.5          | 0.2        | 110,995           | 99.4                           | 2.0                     | 0.8               | 0.0        |
| Northern Ireland             | 2000-2014       | 4,223              | 0.1              | 0.0        | 0.1        | 4,214             | 0.8          | 0.1        | 4,179             | 99.1                           | 1.6                     | 0.0               | 0.0        |
| Scotland                     | 2000-2014       | 13,975             | 0.0              | 0.0        | 24.5       | 10,555            | 0.5          | 0.0        | 10,502            | 99.8                           | 1.1                     | 0.1               | 0.0        |
| Wales                        | 2000-2014       | 8,749              | 0.0              | 0.0        | 57.9       | 3,686             | 3.5          | 0.0        | 3,557             | 97.7                           | 4.0                     | 0.0               | 0.0        |
| <b>OCEANIA</b>               |                 | <b>58,051</b>      | <b>0.9</b>       | <b>0.0</b> | <b>0.9</b> | <b>57,003</b>     | <b>4.1</b>   | <b>0.0</b> | <b>54,647</b>     | <b>99.6</b>                    | <b>1.4</b>              | <b>0.0</b>        | <b>0.0</b> |
| Australia *                  | 2000-2014       | 49,906             | 1.0              | 0.0        | 1.1        | 48,858            | 3.9          | 0.0        | 46,955            | 99.6                           | 1.5                     | 0.0               | 0.0        |
| Australian Capital Territory | 2000-2013       | 547                | 0.0              | 0.0        | 2.0        | 536               | 2.4          | 0.2        | 522               | 99.2                           | 1.0                     | 0.0               | 0.2        |
| New South Wales              | 2000-2012       | 13,195             | 0.8              | 0.0        | 0.1        | 13,079            | 3.2          | 0.0        | 12,663            | 99.1                           | 2.5                     | 0.0               | 0.0        |
| Northern Territory           | 2000-2013       | 195                | 0.0              | 0.0        | 0.0        | 195               | 0.0          | 0.0        | 195               | 100.0                          | 1.5                     | 0.0               | 0.0        |
| Queensland                   | 2000-2014       | 12,139             | 3.2              | 0.0        | 3.9        | 11,274            | 1.7          | 0.0        | 11,081            | 99.5                           | 1.0                     | 0.0               | 0.0        |
| South Australia              | 2000-2013       | 3,482              | 0.2              | 0.0        | 0.0        | 3,475             | 0.3          | 0.0        | 3,465             | 99.9                           | 1.0                     | 0.0               | 0.0        |
| Tasmania                     | 2000-2013       | 964                | 0.0              | 0.0        | 3.2        | 933               | 7.6          | 0.0        | 862               | 99.5                           | 3.5                     | 0.0               | 0.0        |
| Victoria                     | 2000-2014       | 15,074             | 0.0              | 0.0        | 0.1        | 15,064            | 7.8          | 0.0        | 13,895            | 100.0                          | 0.8                     | 0.0               | 0.0        |
| Western Australia            | 2000-2014       | 4,310              | 0.0              | 0.0        | 0.2        | 4,302             | 0.7          | 0.0        | 4,272             | 99.7                           | 1.8                     | 0.0               | 0.0        |
| New Zealand *                | 2000-2014       | 8,145              | 0.0              | 0.0        | 0.0        | 8,145             | 5.6          | 0.0        | 7,692             | 100.0                          | 1.2                     | 0.0               | 0.0        |
| <b>Total</b>                 |                 | <b>1,234,975</b>   | <b>1.5</b>       | <b>0.0</b> | <b>1.4</b> | <b>1,199,177</b>  | <b>3.9</b>   | <b>0.1</b> | <b>1,151,226</b>  | <b>98.9</b>                    | <b>3.9</b>              | <b>0.7</b>        | <b>0.9</b> |

Web-table 2.15: Data quality indicators, patients diagnosed during 2000-2014, by continent, country and registry: LYMPHOID MALIGNANCIES (ADULTS)

|                                    | Calendar period | Patients submitted | Ineligible (%) ¶ |            |            | Eligible patients | Excluded (%) |            | Patients included | Data quality indicators (%) †† |                         |                   |             |
|------------------------------------|-----------------|--------------------|------------------|------------|------------|-------------------|--------------|------------|-------------------|--------------------------------|-------------------------|-------------------|-------------|
|                                    |                 |                    | Incomplete dates | In situ    | Other      |                   | DCO          | Other      |                   | MV                             | Non-specific morphology | Lost to follow-up | Censored    |
| <b>AFRICA</b>                      |                 | <b>2,499</b>       | <b>17.0</b>      | <b>0.0</b> | <b>0.3</b> | <b>2,068</b>      | <b>1.1</b>   | <b>0.1</b> | <b>2,042</b>      | <b>97.9</b>                    | <b>11.3</b>             | <b>0.9</b>        | <b>37.3</b> |
| Algerian registries                | 2000-2014       | 1,555              | 10.0             | 0.0        | 0.5        | 1,393             | 1.1          | 0.1        | 1,376             | 99.9                           | 7.6                     | 0.0               | 28.3        |
| Annaba                             | 2000-2014       | 596                | 12.6             | 0.0        | 0.8        | 516               | 0.4          | 0.0        | 514               | 99.6                           | 4.1                     | 0.0               | 69.8        |
| Sétif                              | 2000-2013       | 383                | 20.9             | 0.0        | 0.3        | 302               | 0.0          | 0.7        | 300               | 100.0                          | 0.0                     | 0.0               | 9.7         |
| Tlemcen                            | 2006-2014       | 576                | 0.0              | 0.0        | 0.2        | 575               | 2.3          | 0.0        | 562               | 100.0                          | 14.8                    | 0.0               | 0.2         |
| Mali (Bamako)                      | -               | -                  | -                | -          | -          | -                 | -            | -          | -                 | -                              | -                       | -                 | -           |
| Mauritius *                        | 2010-2012       | 86                 | 0.0              | 0.0        | 0.0        | 86                | 0.0          | 0.0        | 86                | 100.0                          | 22.1                    | 0.0               | 0.0         |
| Morocco (Casablanca)               | -               | -                  | -                | -          | -          | -                 | -            | -          | -                 | -                              | -                       | -                 | -           |
| Nigeria (Ibadan)                   | 2005-2014       | 690                | 39.0             | 0.0        | 0.0        | 421               | 1.9          | 0.2        | 412               | 94.2                           | 15.3                    | 0.0               | 72.3        |
| South Africa (Eastern Cape)        | 2000-2014       | 168                | 0.0              | 0.0        | 0.0        | 168               | 0.0          | 0.0        | 168               | 89.9                           | 26.2                    | 10.7              | 44.0        |
| <b>AMERICA (Central and South)</b> |                 | <b>51,913</b>      | <b>2.5</b>       | <b>0.0</b> | <b>0.8</b> | <b>50,187</b>     | <b>4.6</b>   | <b>0.3</b> | <b>47,740</b>     | <b>99.4</b>                    | <b>6.1</b>              | <b>5.4</b>        | <b>6.2</b>  |
| Argentinian registries             | 2002-2013       | 4,561              | 3.5              | 0.0        | 0.0        | 4,400             | 2.6          | 0.1        | 4,281             | 100.0                          | 8.3                     | 0.0               | 0.0         |
| Chubut                             | 2008-2013       | 265                | 60.4             | 0.0        | 0.0        | 105               | 0.0          | 1.0        | 104               | 100.0                          | 13.5                    | 0.0               | 0.0         |
| Córdoba                            | 2004-2012       | 1,766              | 0.0              | 0.0        | 0.1        | 1,765             | 6.1          | 0.1        | 1,657             | 99.9                           | 11.2                    | 0.0               | 0.0         |
| Mendoza                            | 2003-2013       | 2,530              | 0.0              | 0.0        | 0.0        | 2,530             | 0.3          | 0.1        | 2,520             | 100.0                          | 6.2                     | 0.0               | 0.0         |
| Tierra del Fuego                   | -               | -                  | -                | -          | -          | -                 | -            | -          | -                 | -                              | -                       | -                 | -           |
| Argentina (Childhood) †            | -               | -                  | -                | -          | -          | -                 | -            | -          | -                 | -                              | -                       | -                 | -           |
| Brazilian registries               | 2000-2014       | 3,666              | 0.2              | 0.0        | 0.2        | 3,652             | 10.5         | 0.0        | 3,270             | 99.8                           | 5.6                     | 0.0               | 0.1         |
| Aracaju                            | 2000-2012       | 677                | 1.0              | 0.0        | 0.0        | 670               | 4.2          | 0.0        | 642               | 99.5                           | 1.7                     | 0.0               | 0.0         |
| Cuiabá                             | -               | -                  | -                | -          | -          | -                 | -            | -          | -                 | -                              | -                       | -                 | -           |
| Curitiba                           | 2000-2012       | 2,743              | 0.0              | 0.0        | 0.2        | 2,737             | 12.9         | 0.0        | 2,383             | 99.8                           | 7.1                     | 0.0               | 0.0         |
| Goiânia                            | -               | -                  | -                | -          | -          | -                 | -            | -          | -                 | -                              | -                       | -                 | -           |
| Jaú                                | 2000-2014       | 246                | 0.4              | 0.0        | 0.0        | 245               | 0.0          | 0.0        | 245               | 100.0                          | 1.2                     | 0.0               | 1.2         |
| São Paulo                          | -               | -                  | -                | -          | -          | -                 | -            | -          | -                 | -                              | -                       | -                 | -           |
| Chilean registries                 | 2000-2012       | 1,976              | 0.0              | 0.0        | 0.1        | 1,975             | 0.4          | 0.0        | 1,968             | 99.6                           | 3.7                     | 0.0               | 13.4        |
| Antofagasta                        | 2003-2010       | 314                | 0.0              | 0.0        | 0.0        | 314               | 0.3          | 0.0        | 313               | 99.7                           | 7.7                     | 0.0               | 11.2        |
| Biobio                             | 2003-2012       | 451                | 0.0              | 0.0        | 0.2        | 450               | 1.3          | 0.0        | 444               | 99.8                           | 1.8                     | 0.0               | 7.2         |
| Concepción                         | 2006-2010       | 636                | 0.0              | 0.0        | 0.0        | 636               | 0.0          | 0.0        | 636               | 99.1                           | 3.0                     | 0.0               | 16.4        |
| Los Rios                           | 2000-2012       | 575                | 0.0              | 0.0        | 0.0        | 575               | 0.0          | 0.0        | 575               | 100.0                          | 3.7                     | 0.0               | 16.0        |
| Colombian registries               | 2000-2014       | 5,188              | 2.5              | 0.0        | 0.1        | 5,054             | 0.6          | 0.4        | 5,004             | 99.1                           | 7.2                     | 0.0               | 21.9        |
| Bucaramanga                        | -               | -                  | -                | -          | -          | -                 | -            | -          | -                 | -                              | -                       | -                 | -           |
| Cali                               | 2000-2014       | 4,264              | 1.0              | 0.0        | 0.1        | 4,215             | 0.6          | 0.3        | 4,177             | 99.1                           | 7.6                     | 0.0               | 24.1        |
| Manizales                          | 2003-2012       | 376                | 12.0             | 0.0        | 0.3        | 330               | 0.0          | 2.1        | 323               | 100.0                          | 5.3                     | 0.0               | 26.3        |
| Pasto                              | 2000-2012       | 548                | 7.1              | 0.0        | 0.0        | 509               | 1.0          | 0.0        | 504               | 98.8                           | 5.4                     | 0.0               | 1.4         |
| Costa Rica *                       | 2002-2014       | 5,067              | 0.0              | 0.0        | 7.4        | 4,693             | 0.4          | 0.6        | 4,646             | 99.7                           | 3.9                     | 0.0               | 0.0         |
| Cuba *                             | 2000-2012       | 9,226              | 0.0              | 0.0        | 0.0        | 9,226             | 8.4          | 0.0        | 8,451             | 100.0                          | 9.3                     | 29.4              | 0.0         |
| Ecuadorian registries              | 2000-2013       | 6,985              | 6.9              | 0.0        | 0.1        | 6,494             | 1.3          | 1.2        | 6,330             | 99.3                           | 6.3                     | 0.3               | 2.7         |
| Cuenca                             | 2000-2012       | 580                | 34.5             | 0.0        | 0.0        | 380               | 1.3          | 0.0        | 375               | 98.4                           | 4.3                     | 0.0               | 24.5        |
| Guayaquil                          | 2005-2013       | 1,896              | 0.1              | 0.0        | 0.1        | 1,894             | 0.4          | 4.2        | 1,808             | 99.3                           | 3.8                     | 0.0               | 0.0         |
| Loja                               | 2000-2013       | 330                | 0.9              | 0.0        | 0.0        | 327               | 0.0          | 0.0        | 327               | 99.4                           | 4.9                     | 5.5               | 0.0         |
| Manabí                             | 2000-2013       | 995                | 7.2              | 0.0        | 0.8        | 915               | 3.8          | 0.0        | 880               | 98.8                           | 6.6                     | 0.0               | 0.5         |
| Quito                              | 2000-2013       | 3,184              | 6.4              | 0.0        | 0.0        | 2,978             | 1.3          | 0.0        | 2,940             | 99.6                           | 8.1                     | 0.0               | 2.7         |
| Guadeloupe *                       | 2008-2013       | 481                | 0.0              | 0.0        | 0.2        | 480               | 0.0          | 0.0        | 480               | 100.0                          | 0.0                     | 0.0               | 40.6        |
| Martinique *                       | 2000-2012       | 1,269              | 0.0              | 0.0        | 0.2        | 1,267             | 0.0          | 0.8        | 1,257             | 100.0                          | 0.0                     | 5.6               | 0.0         |
| Mexico (Childhood) †               | -               | -                  | -                | -          | -          | -                 | -            | -          | -                 | -                              | -                       | -                 | -           |
| Peru (Lima)                        | 2010-2012       | 4,011              | 0.0              | 0.0        | 0.1        | 4,006             | 8.8          | 0.0        | 3,653             | 97.5                           | 6.0                     | 0.0               | 33.8        |
| Puerto Rico *                      | 2000-2011       | 9,483              | 5.7              | 0.0        | 0.0        | 8,940             | 6.0          | 0.0        | 8,400             | 99.3                           | 4.1                     | 0.0               | 0.0         |
| Uruguay *                          | -               | -                  | -                | -          | -          | -                 | -            | -          | -                 | -                              | -                       | -                 | -           |
| <b>AMERICA (North)</b>             |                 | <b>1,395,565</b>   | <b>1.3</b>       | <b>0.0</b> | <b>0.0</b> | <b>1,377,904</b>  | <b>1.5</b>   | <b>0.0</b> | <b>1,356,829</b>  | <b>99.2</b>                    | <b>3.0</b>              | <b>1.4</b>        | <b>0.0</b>  |
| Canadian registries                | 2000-2014       | 140,889            | 0.2              | 0.0        | 0.1        | 140,470           | 0.8          | 0.0        | 139,370           | 98.3                           | 3.0                     | 0.0               | 0.0         |
| Alberta                            | 2000-2014       | 16,850             | 0.3              | 0.0        | 0.0        | 16,797            | 0.2          | 0.0        | 16,762            | 99.4                           | 1.4                     | 0.0               | 0.0         |
| British Columbia                   | 2000-2014       | 23,783             | 0.6              | 0.0        | 0.4        | 23,542            | 1.0          | 0.0        | 23,312            | 99.6                           | 1.0                     | 0.0               | 0.0         |
| Manitoba                           | 2000-2014       | 7,162              | 0.3              | 0.0        | 0.0        | 7,141             | 0.8          | 0.0        | 7,084             | 98.1                           | 3.0                     | 0.0               | 0.0         |
| New Brunswick                      | 2000-2014       | 4,648              | 0.1              | 0.0        | 0.0        | 4,645             | 0.2          | 0.0        | 4,635             | 99.2                           | 2.3                     | 0.0               | 0.0         |
| Newfoundland & Labrador            | 2000-2014       | 2,346              | 0.3              | 0.0        | 0.0        | 2,340             | 0.8          | 0.0        | 2,322             | 99.6                           | 2.3                     | 0.0               | 0.0         |
| Nova Scotia                        | 2000-2014       | 5,501              | 1.6              | 0.0        | 0.0        | 5,414             | 0.8          | 0.0        | 5,373             | 98.8                           | 2.5                     | 0.0               | 0.0         |
| Ontario                            | 2000-2014       | 73,637             | 0.0              | 0.0        | 0.0        | 73,637            | 0.9          | 0.0        | 73,000            | 97.4                           | 4.3                     | 0.0               | 0.0         |
| Prince Edward Island               | 2000-2014       | 839                | 0.0              | 0.0        | 0.1        | 838               | 1.4          | 0.0        | 826               | 99.0                           | 1.5                     | 0.0               | 0.0         |
| Saskatchewan                       | 2000-2014       | 6,123              | 0.0              | 0.0        | 0.1        | 6,116             | 1.0          | 0.0        | 6,056             | 99.1                           | 1.7                     | 0.0               | 0.0         |
| US registries                      | 2000-2014       | 1,254,676          | 1.4              | 0.0        | 0.0        | 1,237,434         | 1.6          | 0.0        | 1,217,459         | 99.3                           | 3.0                     | 1.6               | 0.0         |
| Alabama                            | 2000-2014       | 22,262             | 0.9              | 0.0        | 0.0        | 22,051            | 1.5          | 0.0        | 21,721            | 99.4                           | 3.5                     | 0.0               | 0.0         |
| Alaska                             | 2000-2013       | 2,358              | 4.5              | 0.0        | 0.0        | 2,251             | 0.9          | 0.0        | 2,231             | 98.8                           | 3.3                     | 0.0               | 0.0         |
| Arkansas                           | 2000-2011       | 11,272             | 0.5              | 0.0        | 0.0        | 11,213            | 0.4          | 0.0        | 11,169            | 99.3                           | 3.8                     | 0.0               | 0.0         |
| California                         | 2000-2011       | 129,877            | 3.0              | 0.0        | 0.0        | 125,980           | 1.0          | 0.0        | 124,704           | 99.3                           | 2.7                     | 0.0               | 0.0         |
| Greater Bay Area                   | 2000-2014       | 34,514             | 2.2              | 0.0        | 0.0        | 33,745            | 1.0          | 0.1        | 33,406            | 99.4                           | 3.0                     | 7.0               | 0.0         |
| Greater California                 | 2000-2014       | 89,524             | 3.1              | 0.0        | 0.0        | 86,739            | 1.1          | 0.0        | 85,751            | 99.2                           | 2.6                     | 7.3               | 0.0         |
| Los Angeles                        | 2000-2014       | 41,693             | 2.3              | 0.0        | 0.0        | 40,714            | 0.7          | 0.1        | 40,389            | 99.4                           | 1.9                     | 14.0              | 0.0         |
| Colorado                           | 2000-2013       | 20,664             | 0.7              | 0.0        | 0.0        | 20,522            | 2.2          | 0.0        | 20,068            | 99.5                           | 2.1                     | 0.0               | 0.0         |
| Connecticut                        | 2000-2014       | 22,030             | 0.6              | 0.0        | 0.0        | 21,894            | 1.1          | 0.0        | 21,644            | 99.6                           | 2.5                     | 3.7               | 0.0         |
| Delaware                           | 2000-2014       | 5,063              | 0.9              | 0.0        | 0.0        | 5,016             | 1.9          | 0.0        | 4,918             | 99.1                           | 2.3                     | 0.0               | 0.0         |
| Florida                            | 2000-2013       | 100,071            | 0.2              | 0.0        | 0.0        | 99,821            | 1.7          | 0.1        | 98,031            | 99.7                           | 4.1                     | 0.0               | 0.0         |
| Georgia                            | 2000-2014       | 41,155             | 0.1              | 0.0        | 0.0        | 41,126            | 1.3          | 0.0        | 40,580            | 99.2                           | 3.4                     | 0.0               | 0.0         |
| Atlanta                            | 2000-2014       | 13,525             | 0.0              | 0.0        | 0.0        | 13,523            | 0.8          | 0.0        | 13,413            | 99.1                           | 3.6                     | 0.0               | 0.0         |
| Hawaii                             | 2000-2014       | 5,939              | 0.6              | 0.0        | 0.0        | 5,902             | 0.8          | 0.0        | 5,853             | 99.3                           | 2.7                     | 3.9               | 0.0         |
| Idaho                              | 2000-2014       | 7,648              | 1.0              | 0.0        | 0.0        | 7,570             | 2.4          | 0.0        | 7,385             | 99.2                           | 1.9                     | 0.0               | 0.0         |
| Indiana                            | 2000-2014       | 33,739             | 0.7              | 0.0        | 0.0        | 33,497            | 1.8          | 0.0        | 32,908            | 99.3                           | 2.3                     | 0.0               | 0.0         |
| Iowa                               | 2000-2014       | 19,550             | 1.5              | 0.0        | 0.0        | 19,265            | 1.2          | 0.0        | 19,035            | 99.2                           | 2.0                     | 1.7               | 0.0         |
| Kentucky                           | 2000-2014       | 24,079             | 0.0              | 0.0        | 0.0        | 24,079            | 1.0          | 0.0        | 23,844            | 98.9                           | 2.6                     | 1.6               | 0.0         |
| Louisiana                          | 2000-2014       | 23,232             | 0.6              | 0.0        | 0.0        | 23,086            | 0.9          | 0.0        | 22,870            | 99.3                           | 3.1                     | 2.7               | 0.0         |
| Maine                              | 2000-2013       | 8,263              | 0.3              | 0.0        | 0.0        | 8,237             | 1.6          | 0.0        | 8,105             | 99.1                           | 2.4                     | 0.0               | 0.0         |
| Massachusetts                      | 2000-2009       | 24,012             | 0.1              | 0.0        | 0.0        | 23,992            | 2.0          | 0.0        | 23,508            | 99.6                           | 2.1                     | 0.0               | 0.0         |
| Michigan                           | 2000-2013       | 52,741             | 0.8              | 0.0        | 0.0        | 52,337            | 1.2          | 0.1        | 51,685            | 99.4                           | 3.0                     | 0.0               | 0.0         |

Web-table 2.15: Data quality indicators, patients diagnosed during 2000-2014, by continent, country and registry: LYMPHOID MALIGNANCIES (ADULTS)

|                     | Calendar period | Patients submitted | Ineligible (%) ¶ |            |            | Eligible patients | Excluded (%) |            | Patients included | Data quality indicators (%) †† |                         |                   |            |
|---------------------|-----------------|--------------------|------------------|------------|------------|-------------------|--------------|------------|-------------------|--------------------------------|-------------------------|-------------------|------------|
|                     |                 |                    | Incomplete dates | In situ    | Other      |                   | DCO          | Other      |                   | MV                             | Non-specific morphology | Lost to follow-up | Censored   |
| Detroit             | 2000-2014       | 23,759             | 1.9              | 0.0        | 0.0        | 23,295            | 1.1          | 0.0        | 23,039            | 99.4                           | 2.7                     | 2.9               | 0.0        |
| Minnesota           | 2000-2013       | 28,468             | 0.1              | 0.0        | 0.0        | 28,449            | 2.0          | 0.0        | 27,866            | 100.0                          | 1.4                     | 0.0               | 0.0        |
| Mississippi         | 2002-2014       | 12,275             | 0.9              | 0.0        | 0.0        | 12,169            | 2.0          | 0.0        | 11,927            | 99.5                           | 3.1                     | 0.0               | 0.0        |
| Missouri            | -               | -                  | -                | -          | -          | -                 | -            | -          | -                 | -                              | -                       | -                 | -          |
| Montana             | 2000-2014       | 5,751              | 2.3              | 0.0        | 0.0        | 5,618             | 2.9          | 0.0        | 5,457             | 99.2                           | 2.0                     | 0.0               | 0.0        |
| Nebraska            | 2000-2014       | 10,443             | 1.0              | 0.0        | 0.0        | 10,334            | 2.2          | 0.0        | 10,109            | 99.6                           | 1.6                     | 0.0               | 0.0        |
| New Hampshire       | 2000-2014       | 7,880              | 0.5              | 0.0        | 0.0        | 7,844             | 1.3          | 0.0        | 7,739             | 99.4                           | 2.5                     | 0.0               | 0.0        |
| New Jersey          | 2000-2014       | 52,890             | 1.7              | 0.0        | 0.0        | 52,007            | 0.9          | 0.0        | 51,542            | 99.4                           | 2.9                     | 30.4              | 0.0        |
| New Mexico          | 2000-2014       | 8,990              | 0.1              | 0.0        | 0.0        | 8,981             | 2.5          | 0.0        | 8,758             | 99.2                           | 3.1                     | 4.8               | 0.2        |
| New York            | 2000-2014       | 120,375            | 4.6              | 0.0        | 0.0        | 114,795           | 0.7          | 0.0        | 113,921           | 99.2                           | 2.5                     | 0.0               | 0.0        |
| New York City       | 2000-2014       | 44,441             | 4.9              | 0.0        | 0.0        | 42,259            | 0.6          | 0.0        | 42,012            | 99.2                           | 2.8                     | 0.0               | 0.0        |
| North Carolina      | 2000-2014       | 46,428             | 0.0              | 0.0        | 0.0        | 46,428            | 2.3          | 0.0        | 45,377            | 99.4                           | 2.6                     | 0.0               | 0.0        |
| Ohio                | 2000-2014       | 60,787             | 0.1              | 0.0        | 0.0        | 60,724            | 2.9          | 0.0        | 58,929            | 99.4                           | 3.3                     | 0.0               | 0.0        |
| Oklahoma            | 2000-2010       | 13,704             | 0.8              | 0.0        | 0.0        | 13,595            | 1.8          | 0.0        | 13,344            | 99.3                           | 6.5                     | 0.0               | 0.0        |
| Oregon              | 2000-2013       | 18,355             | 0.1              | 0.0        | 0.0        | 18,332            | 2.3          | 0.0        | 17,903            | 99.1                           | 3.4                     | 0.0               | 0.0        |
| Pennsylvania        | 2000-2014       | 81,232             | 1.3              | 0.0        | 0.0        | 80,205            | 1.9          | 0.0        | 78,678            | 99.3                           | 2.1                     | 0.0               | 0.0        |
| Rhode Island        | 2000-2014       | 6,299              | 0.3              | 0.0        | 0.0        | 6,277             | 1.7          | 0.0        | 6,172             | 99.4                           | 2.4                     | 0.0               | 0.0        |
| South Carolina      | 2000-2014       | 22,698             | 0.0              | 0.0        | 0.0        | 22,698            | 2.7          | 0.0        | 22,089            | 98.8                           | 3.3                     | 0.0               | 0.0        |
| Tennessee           | 2000-2011       | 23,656             | 0.6              | 0.0        | 0.0        | 23,505            | 2.7          | 0.0        | 22,871            | 99.5                           | 3.6                     | 0.0               | 0.0        |
| Texas               | 2000-2013       | 101,062            | 2.1              | 0.0        | 0.0        | 98,956            | 1.8          | 0.0        | 97,142            | 98.3                           | 4.9                     | 0.0               | 0.0        |
| Utah                | 2000-2014       | 10,168             | 0.5              | 0.0        | 0.0        | 10,113            | 0.3          | 0.0        | 10,084            | 99.1                           | 2.5                     | 4.7               | 0.0        |
| Vermont             | 2000-2013       | 3,465              | 0.4              | 0.0        | 0.0        | 3,452             | 2.2          | 0.0        | 3,377             | 99.2                           | 2.7                     | 0.0               | 0.0        |
| Washington          | 2000-2008       | 20,815             | 1.2              | 0.0        | 0.0        | 20,556            | 1.1          | 0.0        | 20,315            | 99.0                           | 2.6                     | 0.0               | 0.0        |
| Seattle             | 2000-2014       | 25,872             | 1.0              | 0.0        | 0.0        | 25,605            | 0.6          | 0.0        | 25,438            | 99.2                           | 1.8                     | 1.6               | 0.0        |
| West Virginia       | 2000-2014       | 11,253             | 1.4              | 0.0        | 0.0        | 11,094            | 1.3          | 0.0        | 10,945            | 99.2                           | 3.3                     | 0.0               | 0.0        |
| Wisconsin           | 2000-2013       | 31,336             | 0.8              | 0.0        | 0.0        | 31,081            | 2.6          | 0.0        | 30,282            | 99.7                           | 2.8                     | 0.0               | 0.0        |
| Wyoming             | 2000-2013       | 2,391              | 0.4              | 0.0        | 0.0        | 2,382             | 0.4          | 0.0        | 2,373             | 99.4                           | 2.3                     | 0.0               | 0.0        |
| <b>ASIA</b>         |                 | <b>305,418</b>     | <b>0.5</b>       | <b>0.0</b> | <b>0.0</b> | <b>303,819</b>    | <b>3.1</b>   | <b>0.3</b> | <b>293,307</b>    | <b>98.6</b>                    | <b>6.8</b>              | <b>0.7</b>        | <b>1.3</b> |
| Chinese registries  | 2003-2013       | 19,506             | 0.3              | 0.0        | 0.0        | 19,439            | 0.2          | 0.0        | 19,388            | 98.3                           | 20.6                    | 4.8               | 0.2        |
| Beijing             | 2003-2013       | 9,195              | 0.0              | 0.0        | 0.0        | 9,189             | 0.0          | 0.0        | 9,185             | 100.0                          | 10.0                    | 8.1               | 0.3        |
| Changle             | 2003-2013       | 291                | 3.4              | 0.0        | 0.0        | 281               | 0.7          | 1.8        | 274               | 96.4                           | 29.2                    | 1.5               | 0.0        |
| Cixian              | 2003-2013       | 211                | 0.0              | 0.0        | 0.0        | 211               | 0.0          | 0.0        | 211               | 97.2                           | 32.2                    | 0.0               | 0.0        |
| Dafeng              | 2006-2013       | 56                 | 0.0              | 0.0        | 0.0        | 56                | 0.0          | 0.0        | 56                | 100.0                          | 26.8                    | 0.0               | 0.0        |
| Dalian              | 2003-2013       | 2,243              | 0.0              | 0.0        | 0.0        | 2,243             | 0.1          | 0.0        | 2,241             | 99.9                           | 8.3                     | 0.0               | 0.2        |
| Donghai             | 2003-2013       | 476                | 0.0              | 0.0        | 0.0        | 476               | 2.3          | 0.0        | 465               | 96.8                           | 56.3                    | 5.2               | 0.0        |
| Feicheng            | 2003-2013       | 177                | 0.0              | 0.0        | 0.0        | 177               | 0.0          | 0.0        | 177               | 100.0                          | 46.9                    | 6.8               | 0.0        |
| Ganyu               | 2003-2013       | 398                | 0.0              | 0.0        | 0.0        | 398               | 0.0          | 0.0        | 398               | 87.9                           | 45.5                    | 1.0               | 0.0        |
| Guanyun             | 2004-2013       | 409                | 0.0              | 0.0        | 0.0        | 409               | 0.0          | 0.0        | 409               | 99.8                           | 54.8                    | 2.4               | 0.0        |
| Haimen              | 2003-2013       | 1,203              | 0.0              | 0.0        | 0.0        | 1,203             | 0.8          | 0.0        | 1,193             | 87.8                           | 37.5                    | 0.7               | 0.0        |
| Haining             | 2003-2013       | 562                | 0.0              | 0.0        | 0.0        | 562               | 0.9          | 0.0        | 557               | 99.6                           | 37.9                    | 1.4               | 0.0        |
| Jianhu              | 2003-2013       | 368                | 0.0              | 0.0        | 0.0        | 368               | 0.0          | 0.0        | 368               | 96.7                           | 69.8                    | 2.4               | 0.0        |
| Jiashan             | 2003-2013       | 342                | 0.0              | 0.0        | 0.3        | 341               | 0.0          | 0.0        | 341               | 100.0                          | 25.5                    | 0.3               | 0.0        |
| Jintan              | 2003-2013       | 218                | 0.0              | 0.0        | 0.0        | 218               | 1.4          | 0.0        | 215               | 100.0                          | 16.3                    | 1.4               | 0.0        |
| Lianyungang         | 2008-2013       | 368                | 0.0              | 0.0        | 0.0        | 368               | 0.8          | 0.0        | 365               | 93.4                           | 26.6                    | 17.3              | 0.5        |
| Linzhou             | 2003-2013       | 225                | 0.0              | 0.0        | 0.0        | 225               | 0.0          | 0.0        | 225               | 96.0                           | 48.0                    | 0.0               | 0.0        |
| Qidong              | 2003-2013       | 1,257              | 0.0              | 0.0        | 0.0        | 1,257             | 0.0          | 0.0        | 1,257             | 99.4                           | 46.5                    | 1.0               | 0.0        |
| Sihui               | 2003-2013       | 221                | 4.5              | 0.0        | 0.0        | 211               | 2.8          | 0.0        | 205               | 89.8                           | 17.6                    | 2.4               | 1.0        |
| Taixing             | 2003-2013       | 145                | 27.6             | 0.0        | 0.0        | 105               | 0.0          | 0.0        | 105               | 100.0                          | 21.9                    | 16.2              | 0.0        |
| Yangzhong           | 2003-2013       | 60                 | 0.0              | 0.0        | 0.0        | 60                | 0.0          | 0.0        | 60                | 93.3                           | 8.3                     | 0.0               | 0.0        |
| Zhongshan           | 2003-2013       | 1,081              | 0.0              | 0.0        | 0.0        | 1,081             | 0.0          | 0.0        | 1,081             | 97.6                           | 7.2                     | 0.2               | 0.0        |
| Cyprus *            | 2004-2014       | 2,571              | 1.0              | 0.0        | 0.0        | 2,545             | 8.6          | 0.0        | 2,326             | 99.9                           | 1.2                     | 0.0               | 37.1       |
| Hong Kong *         | -               | -                  | -                | -          | -          | -                 | -            | -          | -                 | -                              | -                       | -                 | -          |
| Indian registries   | 2000-2014       | 274                | 0.4              | 0.0        | 0.4        | 272               | 0.0          | 0.0        | 272               | 100.0                          | 8.8                     | 2.6               | 0.0        |
| Guwahati            | -               | -                  | -                | -          | -          | -                 | -            | -          | -                 | -                              | -                       | -                 | -          |
| Karunagappally      | 2000-2014       | 274                | 0.4              | 0.0        | 0.4        | 272               | 0.0          | 0.0        | 272               | 100.0                          | 8.8                     | 2.6               | 0.0        |
| Iran (Golestan)     | -               | -                  | -                | -          | -          | -                 | -            | -          | -                 | -                              | -                       | -                 | -          |
| Israel *            | 2000-2013       | 31,729             | 0.0              | 0.0        | 0.1        | 31,701            | 2.5          | 0.0        | 30,911            | 99.7                           | 2.3                     | 0.0               | 0.0        |
| Japanese registries | 2000-2014       | 94,837             | 0.9              | 0.0        | 0.0        | 93,984            | 8.9          | 0.0        | 85,640            | 97.3                           | 8.0                     | 0.0               | 1.3        |
| Aichi               | 2003-2013       | 16,424             | 0.2              | 0.0        | 0.0        | 16,394            | 6.6          | 0.0        | 15,314            | 97.9                           | 5.5                     | 0.0               | 1.9        |
| Akita               | 2010-2014       | 434                | 3.5              | 0.0        | 1.4        | 413               | 0.0          | 1.5        | 407               | 94.8                           | 7.9                     | 0.0               | 25.8       |
| Ehime               | 2007-2013       | 3,317              | 0.1              | 0.0        | 0.0        | 3,313             | 13.0         | 0.0        | 2,881             | 97.0                           | 5.8                     | 0.0               | 0.0        |
| Fukui               | 2003-2009       | 1,412              | 0.6              | 0.0        | 0.0        | 1,403             | 3.1          | 0.0        | 1,360             | 94.2                           | 8.8                     | 0.0               | 2.1        |
| Gunma               | 2003-2012       | 4,229              | 14.0             | 0.0        | 0.0        | 3,637             | 20.6         | 0.0        | 2,889             | 96.2                           | 7.8                     | 0.0               | 1.3        |
| Hiroshima           | 2004-2008       | 3,647              | 0.4              | 0.0        | 0.0        | 3,633             | 8.3          | 0.0        | 3,333             | 97.0                           | 6.3                     | 0.0               | 0.4        |
| Hyogo               | 2007-2012       | 8,501              | 0.3              | 0.0        | 0.0        | 8,473             | 15.2         | 0.0        | 7,185             | 97.5                           | 5.3                     | 0.0               | 1.2        |
| Ibaraki             | 2006-2012       | 4,676              | 0.2              | 0.0        | 0.0        | 4,667             | 12.0         | 0.0        | 4,108             | 96.6                           | 8.5                     | 0.0               | 1.0        |
| Kanagawa            | 2000-2013       | 15,602             | 0.0              | 0.0        | 0.0        | 15,596            | 3.5          | 0.0        | 15,043            | 99.7                           | 9.2                     | 0.0               | 0.0        |
| Miyagi              | 2000-2010       | 5,427              | 1.2              | 0.0        | 0.0        | 5,361             | 7.1          | 0.0        | 4,979             | 96.4                           | 10.3                    | 0.0               | 1.4        |
| Niigata             | 2000-2013       | 7,443              | 0.2              | 0.0        | 0.0        | 7,422             | 5.0          | 0.0        | 7,050             | 97.0                           | 3.5                     | 0.0               | 0.0        |
| Osaka               | 2000-2008       | 13,747             | 0.0              | 0.0        | 0.0        | 13,743            | 13.5         | 0.0        | 11,882            | 95.5                           | 13.6                    | 0.0               | 3.4        |
| Saga                | 2006-2013       | 1,820              | 0.1              | 0.0        | 0.0        | 1,818             | 6.3          | 0.0        | 1,703             | 97.6                           | 5.0                     | 0.0               | 0.0        |
| Tochigi             | 2006-2013       | 3,852              | 0.5              | 0.0        | 0.0        | 3,832             | 9.0          | 0.0        | 3,489             | 97.0                           | 6.4                     | 0.0               | 0.9        |
| Yamagata            | 2003-2013       | 3,200              | 0.7              | 0.0        | 0.0        | 3,176             | 5.0          | 0.0        | 3,018             | 95.0                           | 12.9                    | 0.0               | 0.4        |
| Yamanashi           | 2008-2012       | 1,106              | 0.3              | 0.0        | 0.0        | 1,103             | 9.4          | 0.0        | 999               | 94.9                           | 9.5                     | 0.0               | 0.5        |
| Jordan *            | 2000-2014       | 6,555              | 0.2              | 0.0        | 0.0        | 6,538             | 0.0          | 0.4        | 6,511             | 99.9                           | 3.0                     | 14.7              | 0.0        |
| Korea * ‡           | 2000-2014       | 70,830             | 0.3              | 0.0        | 0.0        | 70,594            | 0.0          | 0.0        | 70,594            | 98.3                           | 5.9                     | 0.0               | 0.0        |
| Kuwait *            | 2000-2013       | 1,409              | 0.0              | 0.0        | 0.1        | 1,407             | 0.1          | 0.0        | 1,405             | 99.6                           | 0.8                     | 1.6               | 0.0        |
| Malaysia (Penang)   | 2000-2013       | 1,275              | 0.2              | 0.0        | 0.0        | 1,273             | 0.2          | 2.1        | 1,244             | 99.4                           | 9.5                     | 0.0               | 11.7       |
| Mongolia *          | -               | -                  | -                | -          | -          | -                 | -            | -          | -                 | -                              | -                       | -                 | -          |
| Qatar *             | 2000-2014       | 1,045              | 0.0              | 0.0        | 0.0        | 1,045             | 0.2          | 0.1        | 1,042             | 99.9                           | 5.8                     | 0.0               | 55.2       |
| Singapore *         | 2000-2014       | 7,229              | 0.0              | 0.0        | 0.4        | 7,203             | 0.2          | 0.0        | 7,187             | 99.8                           | 1.6                     | 0.0               | 0.0        |
| Taiwan *            | 2000-2014       | 39,720             | 0.0              | 0.0        | 0.0        | 39,704            | 0.0          | 0.0        | 39,704            | 100.0                          | 3.7                     | 0.0               | 0.0        |

Web-table 2.15: Data quality indicators, patients diagnosed during 2000-2014, by continent, country and registry: LYMPHOID MALIGNANCIES (ADULTS)

|                                | Calendar period | Patients submitted | Ineligible (%) ¶ |            |            | Eligible patients | Excluded (%) ¶¶ |            | Patients included | Data quality indicators (%) †† |                         |                   |            |
|--------------------------------|-----------------|--------------------|------------------|------------|------------|-------------------|-----------------|------------|-------------------|--------------------------------|-------------------------|-------------------|------------|
|                                |                 |                    | Incomplete dates | In situ    | Other      |                   | DCO             | Other      |                   | MV                             | Non-specific morphology | Lost to follow-up | Censored   |
| Thai registries                | 2000-2014       | 9,462              | 0.0              | 0.0        | 0.0        | 9,462             | 0.1             | 10.2       | 8,486             | 99.9                           | 16.5                    | 0.1               | 2.7        |
| Bangkok                        | 2001-2012       | 4,443              | 0.0              | 0.0        | 0.0        | 4,443             | 0.0             | 21.5       | 3,486             | 100.0                          | 20.7                    | 0.0               | 0.0        |
| Khon Kaen                      | 2000-2014       | 759                | 0.0              | 0.0        | 0.0        | 759               | 0.0             | 0.3        | 757               | 99.5                           | 12.5                    | 0.0               | 5.7        |
| Lampang                        | 2000-2014       | 1,172              | 0.0              | 0.0        | 0.0        | 1,172             | 0.8             | 0.1        | 1,162             | 100.0                          | 10.3                    | 0.0               | 0.0        |
| Lamphun                        | 2000-2014       | 547                | 0.0              | 0.0        | 0.0        | 547               | 0.0             | 0.0        | 547               | 99.8                           | 16.1                    | 0.0               | 0.0        |
| Lopburi                        | 2000-2014       | 894                | 0.0              | 0.0        | 0.0        | 894               | 0.3             | 0.0        | 891               | 100.0                          | 32.5                    | 0.0               | 19.4       |
| Songkhla                       | 2000-2014       | 1,647              | 0.0              | 0.0        | 0.0        | 1,647             | 0.1             | 0.2        | 1,643             | 99.9                           | 5.3                     | 0.4               | 0.9        |
| Turkish registries             | 2000-2013       | 18,976             | 1.7              | 0.0        | 0.0        | 18,652            | 0.3             | 0.0        | 18,597            | 99.6                           | 3.5                     | 0.2               | 3.8        |
| Ankara                         | 2008-2012       | 6,158              | 0.0              | 0.0        | 0.0        | 6,158             | 0.0             | 0.0        | 6,157             | 100.0                          | 5.1                     | 0.0               | 1.1        |
| Antalya                        | 2006-2012       | 1,661              | 0.4              | 0.0        | 0.1        | 1,654             | 0.1             | 0.0        | 1,653             | 99.5                           | 2.6                     | 0.0               | 0.9        |
| Bursa                          | 2006-2012       | 1,398              | 3.6              | 0.0        | 0.0        | 1,348             | 1.1             | 0.0        | 1,333             | 99.3                           | 2.9                     | 0.0               | 0.0        |
| Edirne                         | 2006-2012       | 365                | 5.8              | 0.0        | 0.0        | 344               | 0.0             | 0.0        | 344               | 100.0                          | 0.9                     | 0.0               | 0.0        |
| Erzurum                        | 2006-2012       | 592                | 1.5              | 0.0        | 0.0        | 583               | 0.0             | 0.0        | 583               | 99.1                           | 3.3                     | 0.0               | 0.7        |
| Eskisehir                      | 2006-2012       | 22                 | 0.0              | 0.0        | 0.0        | 22                | 4.5             | 0.0        | 21                | 71.4                           | 100.0                   | 0.0               | 0.0        |
| Izmir                          | 2000-2013       | 6,805              | 3.4              | 0.0        | 0.0        | 6,571             | 0.5             | 0.0        | 6,534             | 99.3                           | 2.3                     | 0.1               | 9.5        |
| Samsun                         | 2006-2012       | 1,212              | 0.0              | 0.0        | 0.1        | 1,211             | 0.0             | 0.0        | 1,211             | 100.0                          | 3.1                     | 2.4               | 0.0        |
| Trabzon                        | 2006-2012       | 763                | 0.0              | 0.0        | 0.3        | 761               | 0.0             | 0.0        | 761               | 99.3                           | 3.5                     | 0.0               | 0.8        |
| <b>EUROPE</b>                  |                 | <b>1,216,827</b>   | <b>0.2</b>       | <b>0.0</b> | <b>0.3</b> | <b>1,210,554</b>  | <b>2.2</b>      | <b>0.1</b> | <b>1,182,009</b>  | <b>99.5</b>                    | <b>3.7</b>              | <b>1.1</b>        | <b>2.4</b> |
| Austria *                      | 2000-2014       | 34,951             | 0.0              | 0.0        | 3.0        | 33,900            | 6.4             | 0.5        | 31,583            | 99.6                           | 6.2                     | 0.0               | 0.0        |
| Belarus (Childhood) †          | -               | -                  | -                | -          | -          | -                 | -               | -          | -                 | -                              | -                       | -                 | -          |
| Belgium *                      | 2004-2014       | 42,789             | 0.0              | 0.0        | 0.0        | 42,785            | 0.0             | 0.0        | 42,772            | 99.8                           | 0.9                     | 1.5               | 0.0        |
| Bulgaria *                     | 2000-2014       | 15,395             | 0.0              | 0.0        | 0.0        | 15,395            | 3.1             | 0.0        | 14,919            | 100.0                          | 1.9                     | 0.2               | 0.0        |
| Croatia *                      | 2000-2014       | 15,963             | 0.0              | 0.0        | 0.0        | 15,963            | 3.4             | 0.0        | 15,421            | 99.7                           | 0.9                     | 0.0               | 0.0        |
| Czech Republic *               | 2000-2014       | 36,989             | 0.0              | 0.0        | 0.0        | 36,976            | 0.0             | 0.0        | 36,974            | 100.0                          | 5.1                     | 0.0               | 0.0        |
| Denmark *                      | 2000-2014       | 27,815             | 0.0              | 0.0        | 0.2        | 27,756            | 0.0             | 0.0        | 27,756            | 99.9                           | 2.5                     | 0.3               | 0.0        |
| Estonia *                      | 2000-2012       | 4,312              | 0.0              | 0.0        | 0.0        | 4,311             | 2.7             | 0.0        | 4,193             | 99.5                           | 3.4                     | 0.2               | 0.0        |
| Finland *                      | 2000-2014       | 27,512             | 1.9              | 0.0        | 0.0        | 26,977            | 5.9             | 0.0        | 25,395            | 100.0                          | 0.8                     | 0.2               | 0.0        |
| French registries              | 2000-2010       | 42,153             | 0.4              | 0.0        | 0.1        | 41,936            | 0.0             | 0.4        | 41,784            | 100.0                          | 0.6                     | 1.8               | 0.0        |
| Bas-Rhin                       | 2000-2010       | 3,948              | 0.0              | 0.0        | 0.2        | 3,940             | 0.0             | 0.1        | 3,936             | 100.0                          | 0.4                     | 1.7               | 0.0        |
| Basse Normandie                | 2002-2010       | 4,856              | 0.0              | 0.0        | 0.1        | 4,851             | 0.0             | 0.0        | 4,849             | 100.0                          | 0.0                     | 0.1               | 0.0        |
| Burgundy Digestive             | -               | -                  | -                | -          | -          | -                 | -               | -          | -                 | -                              | -                       | -                 | -          |
| Calvados                       | 2000-2002       | 357                | 0.0              | 0.0        | 0.3        | 356               | 0.0             | 0.0        | 356               | 100.0                          | 2.0                     | 0.3               | 0.0        |
| Calvados Digestive             | 2000-2001       | -                  | -                | -          | -          | -                 | -               | -          | -                 | -                              | -                       | -                 | -          |
| Côte-d'Or Gynaecologic         | -               | -                  | -                | -          | -          | -                 | -               | -          | -                 | -                              | -                       | -                 | -          |
| Côte-d'Or Haematopoietic       | 2000-2010       | 2,343              | 0.0              | 0.0        | 0.1        | 2,341             | 0.0             | 0.0        | 2,341             | 100.0                          | 0.0                     | 0.3               | 0.0        |
| Doubs                          | 2000-2010       | 2,089              | 0.0              | 0.0        | 0.2        | 2,085             | 0.0             | 0.1        | 2,083             | 100.0                          | 0.2                     | 0.5               | 0.0        |
| Finistère                      | -               | -                  | -                | -          | -          | -                 | -               | -          | -                 | -                              | -                       | -                 | -          |
| Gironde CNS                    | -               | -                  | -                | -          | -          | -                 | -               | -          | -                 | -                              | -                       | -                 | -          |
| Gironde General                | -               | -                  | -                | -          | -          | -                 | -               | -          | -                 | -                              | -                       | -                 | -          |
| Gironde Haematopoietic         | 2002-2010       | 4,577              | 0.0              | 0.0        | 0.1        | 4,573             | 0.0             | 0.2        | 4,563             | 100.0                          | 0.2                     | 3.6               | 0.0        |
| Haut-Rhin                      | 2000-2010       | 2,808              | 0.2              | 0.0        | 0.0        | 2,801             | 0.0             | 0.4        | 2,791             | 100.0                          | 0.9                     | 1.9               | 0.0        |
| Haute-Vienne                   | 2009-2009       | 172                | 0.0              | 0.0        | 0.0        | 172               | 0.0             | 0.0        | 172               | 100.0                          | 5.2                     | 1.7               | 0.0        |
| Hérault                        | 2000-2010       | 3,786              | 0.0              | 0.0        | 0.2        | 3,780             | 0.0             | 0.9        | 3,745             | 100.0                          | 0.6                     | 3.8               | 0.0        |
| Isère                          | 2000-2010       | 4,283              | 0.0              | 0.0        | 0.1        | 4,277             | 0.0             | 0.7        | 4,249             | 100.0                          | 0.2                     | 1.2               | 0.0        |
| Lille Metro                    | 2008-2010       | 670                | 0.0              | 0.0        | 0.0        | 670               | 0.0             | 0.0        | 670               | 100.0                          | 0.0                     | 1.2               | 0.0        |
| Loire-Atlantique               | 2000-2010       | 8,347              | 1.9              | 0.0        | 0.1        | 8,178             | 0.0             | 0.7        | 8,124             | 100.0                          | 1.5                     | 2.0               | 0.0        |
| Manche                         | 2000-2001       | 346                | 0.0              | 0.0        | 0.0        | 346               | 0.0             | 0.3        | 345               | 100.0                          | 0.9                     | 2.6               | 0.0        |
| Somme                          | 2000-2010       | 2,020              | 0.0              | 0.0        | 0.1        | 2,018             | 0.0             | 0.2        | 2,013             | 100.0                          | 1.0                     | 2.3               | 0.0        |
| Tarn                           | 2000-2010       | 1,551              | 0.0              | 0.0        | 0.2        | 1,548             | 0.0             | 0.1        | 1,547             | 100.0                          | 0.2                     | 1.4               | 0.0        |
| France Childhood Haem †        | -               | -                  | -                | -          | -          | -                 | -               | -          | -                 | -                              | -                       | -                 | -          |
| France Childhood Solid †       | -               | -                  | -                | -          | -          | -                 | -               | -          | -                 | -                              | -                       | -                 | -          |
| German registries              | 2000-2014       | 141,401            | 0.4              | 0.0        | 0.3        | 140,307           | 9.8             | 0.0        | 126,594           | 99.7                           | 1.4                     | 0.4               | 20.3       |
| Brandenburg                    | 2000-2014       | 13,463             | 0.0              | 0.0        | 0.0        | 13,459            | 11.0            | 0.0        | 11,982            | 99.6                           | 1.7                     | 0.0               | 25.0       |
| Bremen                         | 2000-2013       | 3,597              | 0.0              | 0.0        | 0.3        | 3,586             | 8.4             | 0.0        | 3,283             | 99.4                           | 1.0                     | 3.3               | 0.0        |
| Hamburg                        | 2000-2013       | 9,039              | 0.0              | 0.0        | 2.0        | 8,860             | 5.6             | 0.0        | 8,364             | 100.0                          | 1.0                     | 5.1               | 0.0        |
| Lower Saxony                   | 2003-2013       | 34,681             | 1.8              | 0.0        | 0.1        | 34,033            | 14.6            | 0.0        | 29,051            | 99.7                           | 1.8                     | 0.0               | 28.7       |
| Mecklenburg-W. Pomerania       | 2000-2014       | 9,836              | 0.0              | 0.0        | 0.0        | 9,833             | 6.9             | 0.0        | 9,158             | 99.8                           | 1.2                     | 0.0               | 25.9       |
| Rhineland Palatinate           | 2000-2013       | 13,526             | 0.0              | 0.0        | 0.0        | 13,520            | 0.0             | 0.0        | 13,517            | 99.8                           | 0.9                     | 0.0               | 27.8       |
| Saarland                       | 2000-2012       | 4,356              | 0.0              | 0.0        | 1.0        | 4,312             | 4.2             | 0.0        | 4,129             | 99.8                           | 0.8                     | 0.0               | 0.0        |
| Saxony                         | 2000-2014       | 24,932             | 0.0              | 0.0        | 0.1        | 24,918            | 7.6             | 0.0        | 23,031            | 99.7                           | 1.8                     | 0.0               | 24.1       |
| Schleswig-Holstein             | 2000-2012       | 15,616             | 0.0              | 0.0        | 1.1        | 15,441            | 14.7            | 0.0        | 13,163            | 99.9                           | 0.4                     | 0.0               | 0.0        |
| Thuringia                      | 2000-2014       | 12,355             | 0.0              | 0.0        | 0.1        | 12,345            | 11.6            | 0.0        | 10,916            | 99.8                           | 1.4                     | 0.0               | 25.1       |
| Gibraltar *                    | 2000-2008       | 11                 | 27.3             | 0.0        | 0.0        | 8                 | 0.0             | 0.0        | 8                 | 100.0                          | 0.0                     | 0.0               | 25.0       |
| Greece (National Paediatric) † | -               | -                  | -                | -          | -          | -                 | -               | -          | -                 | -                              | -                       | -                 | -          |
| Iceland *                      | 2000-2014       | 1,176              | 0.0              | 0.0        | 0.0        | 1,176             | 0.8             | 0.0        | 1,167             | 99.6                           | 1.3                     | 0.0               | 0.0        |
| Ireland *                      | 2000-2013       | 17,000             | 0.0              | 0.0        | 0.1        | 16,986            | 1.1             | 0.0        | 16,806            | 99.8                           | 6.3                     | 0.0               | 0.0        |
| Italian registries             | 2000-2014       | 121,911            | 0.0              | 0.0        | 0.1        | 121,834           | 0.4             | 0.0        | 121,301           | 98.8                           | 3.7                     | 1.0               | 1.0        |
| Alto Adige                     | 2000-2010       | 1,737              | 0.0              | 0.0        | 0.0        | 1,737             | 0.8             | 0.0        | 1,723             | 99.7                           | 0.3                     | 0.0               | 0.0        |
| Barletta-Andria-Trani          | 2006-2012       | 910                | 0.0              | 0.0        | 0.0        | 910               | 0.7             | 0.0        | 904               | 98.6                           | 1.4                     | 1.4               | 0.0        |
| Basilicata                     | 2006-2010       | 1,067              | 0.0              | 0.0        | 0.0        | 1,067             | 0.0             | 0.0        | 1,067             | 96.1                           | 4.6                     | 0.4               | 0.7        |
| Bergamo                        | 2007-2012       | 2,532              | 0.0              | 0.0        | 0.1        | 2,530             | 0.0             | 0.0        | 2,529             | 99.2                           | 1.3                     | 0.8               | 0.0        |
| Biella-Vercelli                | 2000-2010       | 1,366              | 0.0              | 0.0        | 0.1        | 1,365             | 1.0             | 0.0        | 1,352             | 99.3                           | 1.1                     | 0.5               | 1.9        |
| Brescia                        | 2000-2008       | 3,324              | 0.0              | 0.0        | 0.0        | 3,323             | 0.0             | 0.0        | 3,323             | 99.5                           | 3.2                     | 0.7               | 0.1        |
| Brindisi                       | 2006-2008       | 434                | 0.0              | 0.0        | 0.0        | 434               | 0.0             | 0.0        | 434               | 99.1                           | 0.9                     | 0.2               | 1.6        |
| Caserta                        | 2008-2010       | 709                | 0.0              | 0.0        | 0.1        | 708               | 0.0             | 0.0        | 708               | 97.2                           | 5.5                     | 0.7               | 7.6        |
| Catania-Messina-Enna           | 2003-2012       | 6,462              | 0.0              | 0.0        | 0.0        | 6,461             | 0.3             | 0.0        | 6,444             | 99.0                           | 7.3                     | 0.0               | 2.6        |
| Catanzaro                      | 2003-2009       | 772                | 0.0              | 0.0        | 0.0        | 772               | 0.0             | 0.0        | 772               | 99.6                           | 1.6                     | 0.1               | 0.3        |
| Como                           | 2003-2011       | 1,964              | 0.0              | 0.0        | 0.0        | 1,964             | 0.4             | 0.0        | 1,957             | 99.5                           | 1.1                     | 1.1               | 0.2        |
| Cremona                        | 2005-2010       | 857                | 0.0              | 0.0        | 0.0        | 857               | 0.7             | 0.0        | 851               | 99.1                           | 1.6                     | 1.2               | 0.0        |
| Ferrara                        | 2000-2011       | 2,091              | 0.0              | 0.0        | 0.0        | 2,091             | 0.6             | 0.0        | 2,079             | 99.1                           | 4.7                     | 1.4               | 0.0        |
| Friuli-Venezia-Giulia          | 2000-2010       | 5,463              | 0.0              | 0.0        | 0.0        | 5,463             | 2.6             | 0.0        | 5,320             | 99.6                           | 1.6                     | 0.7               | 0.0        |
| Genoa                          | 2000-2009       | 4,532              | 0.0              | 0.0        | 0.1        | 4,527             | 0.0             | 0.0        | 4,526             | 98.7                           | 1.8                     | 0.0               | 0.0        |
| Latina                         | 2000-2011       | 1,849              | 0.0              | 0.0        | 0.0        | 1,849             | 0.0             | 0.0        | 1,849             | 98.3                           | 3.2                     | 2.5               | 1.8        |
| Lecce                          | 2003-2008       | 1,509              | 0.0              | 0.0        | 0.2        | 1,506             | 0.0             | 0.0        | 1,506             | 98.7                           | 2.7                     | 1.3               | 1.3        |

Web-table 2.15: Data quality indicators, patients diagnosed during 2000-2014, by continent, country and registry: LYMPHOID MALIGNANCIES (ADULTS)

|                      | Calendar period | Patients submitted | Ineligible (%) ¶ |         |       | Eligible patients | Excluded (%) ¶¶ |       | Patients included | Data quality indicators (%) †† |                         |                   |          |
|----------------------|-----------------|--------------------|------------------|---------|-------|-------------------|-----------------|-------|-------------------|--------------------------------|-------------------------|-------------------|----------|
|                      |                 |                    | Incomplete dates | In situ | Other |                   | DCO             | Other |                   | MV                             | Non-specific morphology | Lost to follow-up | Censored |
| Mantova              | 2000-2010       | 1,812              | 0.0              | 0.0     | 0.0   | 1,812             | 0.8             | 0.0   | 1,798             | 97.9                           | 9.6                     | 0.0               | 0.0      |
| Milano               | 2000-2012       | 9,769              | 0.0              | 0.0     | 0.0   | 9,765             | 0.0             | 0.0   | 9,764             | 99.2                           | 1.8                     | 3.6               | 0.3      |
| Modena               | 2000-2012       | 3,933              | 0.0              | 0.0     | 1.0   | 3,895             | 0.1             | 0.0   | 3,892             | 99.7                           | 0.4                     | 0.0               | 1.3      |
| Monza-Brianza        | 2007-2012       | 1,903              | 0.0              | 0.0     | 0.0   | 1,903             | 0.0             | 0.1   | 1,902             | 98.2                           | 3.2                     | 0.5               | 0.0      |
| Naples               | 2000-2012       | 2,816              | 0.0              | 0.0     | 0.0   | 2,816             | 0.0             | 0.0   | 2,816             | 97.1                           | 3.9                     | 2.5               | 1.8      |
| Nuoro                | 2003-2012       | 915                | 0.0              | 0.0     | 0.0   | 915               | 0.7             | 0.0   | 909               | 98.9                           | 1.4                     | 0.0               | 0.0      |
| Palermo              | 2003-2012       | 3,687              | 0.0              | 0.0     | 0.0   | 3,687             | 1.1             | 0.0   | 3,647             | 96.5                           | 4.6                     | 0.4               | 0.0      |
| Parma                | 2000-2014       | 3,225              | 0.0              | 0.0     | 0.0   | 3,225             | 0.3             | 0.0   | 3,216             | 99.8                           | 2.3                     | 1.9               | 0.2      |
| Pavia                | 2003-2009       | 1,685              | 0.0              | 0.0     | 0.0   | 1,685             | 0.1             | 0.0   | 1,684             | 98.9                           | 2.7                     | 0.3               | 0.9      |
| Piacenza             | 2006-2011       | 923                | 0.0              | 0.0     | 0.1   | 922               | 0.0             | 0.0   | 922               | 98.2                           | 1.8                     | 0.7               | 3.1      |
| Ragusa               | 2000-2012       | 1,733              | 0.0              | 0.0     | 0.0   | 1,733             | 1.4             | 0.0   | 1,709             | 98.6                           | 3.6                     | 0.7               | 0.1      |
| Reggio Emilia        | 2000-2012       | 2,882              | 0.0              | 0.0     | 0.0   | 2,882             | 0.0             | 0.0   | 2,881             | 99.0                           | 2.0                     | 1.5               | 0.0      |
| Romagna              | 2000-2012       | 7,141              | 0.0              | 0.0     | 0.1   | 7,133             | 0.2             | 0.0   | 7,120             | 98.5                           | 1.8                     | 0.1               | 0.0      |
| Salerno              | 2000-2009       | 3,382              | 0.0              | 0.0     | 0.0   | 3,382             | 0.0             | 0.0   | 3,381             | 98.0                           | 4.1                     | 0.6               | 4.8      |
| Sassari              | 2000-2011       | 1,990              | 0.0              | 0.0     | 0.0   | 1,990             | 0.3             | 0.0   | 1,985             | 99.0                           | 1.9                     | 0.0               | 0.1      |
| Siracusa             | 2000-2012       | 1,419              | 0.0              | 0.0     | 0.0   | 1,419             | 0.4             | 0.0   | 1,414             | 97.5                           | 4.0                     | 0.0               | 1.1      |
| Sondrio              | 2000-2011       | 852                | 0.0              | 0.0     | 0.0   | 852               | 0.0             | 0.0   | 852               | 98.5                           | 2.9                     | 0.4               | 0.2      |
| Taranto              | 2006-2012       | 1,321              | 0.0              | 0.0     | 0.0   | 1,321             | 1.3             | 0.0   | 1,304             | 98.8                           | 2.1                     | 1.8               | 0.0      |
| Trapani              | 2002-2010       | 1,136              | 0.0              | 0.0     | 0.0   | 1,136             | 0.4             | 0.0   | 1,132             | 98.6                           | 2.7                     | 0.7               | 0.4      |
| Trento               | 2000-2010       | 1,864              | 0.0              | 0.0     | 0.0   | 1,864             | 0.3             | 0.0   | 1,859             | 99.2                           | 6.5                     | 1.1               | 0.0      |
| Turin                | 2000-2012       | 5,425              | 0.0              | 0.0     | 0.0   | 5,425             | 0.8             | 0.0   | 5,384             | 99.9                           | 0.6                     | 2.6               | 0.0      |
| Tuscany              | 2000-2009       | 4,922              | 0.0              | 0.0     | 0.0   | 4,921             | 0.4             | 0.0   | 4,902             | 96.7                           | 6.1                     | 0.0               | 3.0      |
| Umbria               | 2000-2013       | 5,267              | 0.0              | 0.0     | 0.0   | 5,266             | 0.1             | 0.0   | 5,262             | 99.2                           | 11.1                    | 0.3               | 0.1      |
| Varese               | 2000-2012       | 4,459              | 0.0              | 0.0     | 0.0   | 4,457             | 0.4             | 0.0   | 4,440             | 99.8                           | 0.7                     | 0.8               | 0.3      |
| Veneto               | 2000-2009       | 9,240              | 0.0              | 0.0     | 0.1   | 9,232             | 0.8             | 0.0   | 9,154             | 98.9                           | 8.9                     | 0.9               | 2.0      |
| Viterbo              | 2006-2010       | 632                | 0.0              | 0.0     | 0.0   | 632               | 0.6             | 0.0   | 628               | 96.8                           | 3.3                     | 0.3               | 33.6     |
| Piedmont Childhood   | -               | -                  | -                | -       | -     | -                 | -               | -     | -                 | -                              | -                       | -                 | -        |
| Latvia *             | 2000-2014       | 2,681              | 0.0              | 0.0     | 0.0   | 2,681             | 0.0             | 0.1   | 2,679             | 100.0                          | 0.0                     | 0.0               | 0.0      |
| Lithuania *          | 2000-2012       | 9,767              | 0.0              | 0.0     | 0.1   | 9,756             | 0.1             | 0.0   | 9,741             | 100.0                          | 3.2                     | 0.0               | 0.5      |
| Malta *              | 2000-2013       | 1,406              | 0.0              | 0.0     | 0.1   | 1,405             | 1.6             | 0.0   | 1,383             | 99.4                           | 3.0                     | 0.0               | 0.0      |
| Netherlands *        | 2000-2014       | 79,376             | 0.0              | 0.0     | 0.2   | 79,248            | 0.3             | 0.7   | 78,420            | 99.9                           | 0.3                     | 0.7               | 0.0      |
| Norway *             | 2000-2014       | 25,732             | 0.0              | 0.0     | 4.6   | 24,544            | 0.6             | 0.0   | 24,389            | 99.8                           | 0.7                     | 0.3               | 0.0      |
| Poland *             | 2000-2014       | 94,631             | 0.0              | 0.0     | 0.2   | 94,436            | 0.0             | 0.3   | 94,159            | 100.0                          | 9.2                     | 0.0               | 0.0      |
| Greater Poland       | 2000-2014       | 8,673              | 0.0              | 0.0     | 0.2   | 8,657             | 0.0             | 0.3   | 8,631             | 100.0                          | 9.6                     | 0.0               | 0.0      |
| Holy Cross           | 2000-2014       | 3,982              | 0.0              | 0.0     | 0.2   | 3,975             | 0.0             | 0.2   | 3,967             | 100.0                          | 9.4                     | 0.0               | 0.0      |
| Kujavia-Pomerania    | 2000-2014       | 5,403              | 0.0              | 0.0     | 0.2   | 5,391             | 0.0             | 0.5   | 5,366             | 100.0                          | 10.2                    | 0.0               | 0.0      |
| Lesser Poland        | 2000-2014       | 8,168              | 0.0              | 0.0     | 0.2   | 8,151             | 0.0             | 0.2   | 8,133             | 100.0                          | 15.1                    | 0.0               | 0.0      |
| Łódź                 | 2000-2014       | 7,093              | 0.0              | 0.0     | 0.2   | 7,080             | 0.0             | 0.6   | 7,034             | 100.0                          | 9.6                     | 0.0               | 0.0      |
| Lower Silesia        | 2000-2014       | 7,126              | 0.0              | 0.0     | 0.3   | 7,102             | 0.2             | 0.0   | 7,085             | 100.0                          | 15.2                    | 0.3               | 0.0      |
| Lublin               | 2000-2014       | 6,289              | 0.0              | 0.0     | 0.3   | 6,270             | 0.0             | 0.1   | 6,262             | 100.0                          | 7.6                     | 0.0               | 0.0      |
| Lubush               | 2000-2014       | 1,941              | 0.0              | 0.0     | 0.2   | 1,938             | 0.0             | 0.3   | 1,933             | 100.0                          | 7.3                     | 0.0               | 0.0      |
| Mazovia              | 2000-2014       | 11,429             | 0.0              | 0.0     | 0.2   | 11,407            | 0.0             | 0.1   | 11,399            | 100.0                          | 4.3                     | 0.0               | 0.0      |
| Opole                | 2000-2014       | 2,224              | 0.0              | 0.0     | 0.2   | 2,219             | 0.0             | 0.4   | 2,211             | 100.0                          | 5.5                     | 0.0               | 0.0      |
| Podlahaia            | 2000-2014       | 2,661              | 0.0              | 0.0     | 0.2   | 2,655             | 0.0             | 0.3   | 2,646             | 100.0                          | 13.1                    | 0.0               | 0.0      |
| Pomerania            | 2000-2014       | 5,780              | 0.0              | 0.0     | 0.2   | 5,771             | 0.0             | 0.3   | 5,755             | 100.0                          | 4.6                     | 0.0               | 0.0      |
| Silesia              | 2000-2014       | 11,190             | 0.0              | 0.0     | 0.2   | 11,173            | 0.0             | 0.2   | 11,155            | 100.0                          | 5.4                     | 0.0               | 0.0      |
| Subcarpathia         | 2000-2014       | 6,181              | 0.0              | 0.0     | 0.1   | 6,174             | 0.0             | 0.8   | 6,126             | 100.0                          | 12.3                    | 0.0               | 0.0      |
| Varmia-Mazuria       | 2000-2014       | 2,983              | 0.0              | 0.0     | 0.3   | 2,975             | 0.0             | 0.3   | 2,967             | 100.0                          | 11.2                    | 0.0               | 0.5      |
| West Pomerania       | 2000-2014       | 3,508              | 0.0              | 0.0     | 0.3   | 3,498             | 0.0             | 0.3   | 3,489             | 100.0                          | 11.3                    | 0.0               | 0.0      |
| Portugal *           | 2000-2014       | 32,186             | 0.5              | 0.0     | 0.0   | 32,034            | 0.0             | 0.0   | 32,024            | 99.6                           | 7.5                     | 2.0               | 0.0      |
| Azores               | 2000-2014       | 870                | 0.0              | 0.0     | 0.0   | 870               | 0.7             | 0.0   | 864               | 98.7                           | 4.4                     | 0.5               | 0.3      |
| Portugal Central     | 2003-2010       | 3,486              | 1.3              | 0.0     | 0.1   | 3,437             | 0.0             | 0.0   | 3,437             | 97.0                           | 15.1                    | 0.5               | 0.0      |
| Portugal North       | 2000-2010       | 7,159              | 1.4              | 0.0     | 0.0   | 7,058             | 0.0             | 0.0   | 7,058             | 99.6                           | 4.7                     | 0.0               | 0.0      |
| Portugal South       | 2000-2014       | 20,671             | 0.0              | 0.0     | 0.0   | 20,669            | 0.0             | 0.0   | 20,665            | 100.0                          | 7.3                     | 3.1               | 0.0      |
| Romania (Cluj)       | 2006-2012       | 970                | 0.0              | 0.0     | 0.0   | 970               | 0.1             | 0.0   | 969               | 99.2                           | 3.1                     | 0.0               | 0.1      |
| Russian registries ‡ | 2000-2014       | 9,310              | 0.0              | 0.0     | 0.0   | 9,309             | 0.9             | 0.2   | 9,209             | 99.8                           | 9.6                     | 2.2               | 0.7      |
| Arkhangelsk          | 2000-2014       | 2,329              | 0.0              | 0.0     | 0.0   | 2,329             | 0.5             | 0.3   | 2,310             | 100.0                          | 9.8                     | 1.6               | 0.0      |
| Karelia              | 2000-2014       | 830                | 0.0              | 0.0     | 0.0   | 830               | 0.8             | 0.0   | 823               | 98.2                           | 25.3                    | 1.3               | 8.1      |
| Omsk                 | -               | -                  | -                | -       | -     | -                 | -               | -     | -                 | -                              | -                       | -                 | -        |
| Samara               | 2000-2014       | 6,151              | 0.0              | 0.0     | 0.0   | 6,150             | 1.0             | 0.2   | 6,076             | 99.9                           | 7.5                     | 2.5               | 0.0      |
| Tomsk                | -               | -                  | -                | -       | -     | -                 | -               | -     | -                 | -                              | -                       | -                 | -        |
| Slovakia *           | 2000-2010       | 12,609             | 0.0              | 0.0     | 0.0   | 12,608            | 6.2             | 0.0   | 11,821            | 100.0                          | 1.2                     | 0.0               | 0.0      |
| Slovenia *           | 2000-2013       | 7,592              | 0.0              | 0.0     | 0.0   | 7,591             | 1.2             | 0.0   | 7,498             | 100.0                          | 0.7                     | 0.0               | 0.0      |
| Spanish registries   | 2000-2013       | 32,231             | 0.3              | 0.0     | 0.0   | 32,127            | 1.1             | 0.0   | 31,782            | 99.0                           | 2.2                     | 0.5               | 0.0      |
| Basque Country       | 2000-2013       | 10,220             | 0.0              | 0.0     | 0.0   | 10,218            | 0.8             | 0.0   | 10,133            | 98.7                           | 2.6                     | 0.5               | 0.0      |
| Canaries             | 2000-2011       | 5,463              | 0.0              | 0.0     | 0.0   | 5,463             | 0.7             | 0.0   | 5,423             | 98.9                           | 2.5                     | 0.1               | 0.0      |
| Girona               | 2000-2013       | 3,133              | 2.1              | 0.0     | 0.1   | 3,064             | 1.8             | 0.0   | 3,010             | 99.5                           | 1.0                     | 1.3               | 0.0      |
| Granada              | 2000-2012       | 2,594              | 0.0              | 0.0     | 0.0   | 2,594             | 1.7             | 0.0   | 2,550             | 98.8                           | 1.4                     | 0.2               | 0.0      |
| Mallorca             | 2000-2012       | 2,692              | 0.7              | 0.0     | 0.0   | 2,673             | 1.0             | 0.0   | 2,647             | 99.1                           | 1.5                     | 2.3               | 0.0      |
| Murcia               | 2000-2010       | 3,781              | 0.0              | 0.0     | 0.0   | 3,781             | 0.7             | 0.1   | 3,752             | 99.1                           | 2.7                     | 0.0               | 0.0      |
| Navarra              | 2000-2010       | 1,878              | 0.0              | 0.0     | 0.1   | 1,877             | 1.0             | 0.0   | 1,858             | 98.9                           | 3.3                     | 0.4               | 0.0      |
| Tarragona            | 2000-2011       | 2,470              | 0.5              | 0.0     | 0.0   | 2,457             | 2.0             | 0.0   | 2,409             | 99.6                           | 0.9                     | 0.0               | 0.0      |
| Spain Childhood      | -               | -                  | -                | -       | -     | -                 | -               | -     | -                 | -                              | -                       | -                 | -        |
| Valencia Childhood   | -               | -                  | -                | -       | -     | -                 | -               | -     | -                 | -                              | -                       | -                 | -        |
| Sweden *             | 2000-2014       | 45,018             | 0.0              | 0.0     | 1.5   | 44,357            | 1.3             | 0.0   | 43,784            | 100.0                          | 4.9                     | 0.2               | 0.0      |
| Swiss registries     | 2000-2014       | 19,274             | 0.0              | 0.0     | 0.3   | 19,213            | 1.1             | 0.4   | 18,923            | 99.8                           | 0.7                     | 5.2               | 5.2      |
| Basel                | 2000-2011       | 1,059              | 0.0              | 0.0     | 0.5   | 1,054             | 0.4             | 5.5   | 992               | 100.0                          | 0.0                     | 0.7               | 11.8     |
| Fribourg             | 2006-2014       | 842                | 0.0              | 0.0     | 4.3   | 806               | 0.1             | 2.1   | 788               | 100.0                          | 0.5                     | 2.2               | 0.0      |
| Geneva               | 2000-2013       | 2,205              | 0.0              | 0.0     | 0.2   | 2,200             | 0.7             | 0.0   | 2,185             | 100.0                          | 0.5                     | 6.5               | 0.0      |
| Graubünden-Glarus    | 2000-2014       | 1,221              | 0.0              | 0.0     | 0.0   | 1,221             | 0.0             | 0.0   | 1,221             | 100.0                          | 1.2                     | 44.1              | 0.0      |
| Neuchâtel            | 2000-2014       | 862                | 0.0              | 0.0     | 0.1   | 861               | 0.6             | 0.0   | 856               | 100.0                          | 0.7                     | 3.7               | 4.2      |
| St Gallen-Appenzell  | 2000-2014       | 2,568              | 0.0              | 0.0     | 0.0   | 2,568             | 0.0             | 0.0   | 2,568             | 100.0                          | 0.1                     | 3.7               | 0.0      |
| Ticino               | 2000-2014       | 2,182              | 0.0              | 0.0     | 0.0   | 2,181             | 1.9             | 0.0   | 2,139             | 99.7                           | 1.4                     | 2.9               | 0.0      |
| Valais               | 2000-2014       | 1,628              | 0.0              | 0.0     | 0.7   | 1,616             | 0.4             | 0.0   | 1,609             | 99.5                           | 1.1                     | 1.2               | 0.0      |

Web-table 2.15: Data quality indicators, patients diagnosed during 2000-2014, by continent, country and registry: LYMPHOID MALIGNANCIES (ADULTS)

|                              | Calendar period | Patients submitted | Ineligible (%) ¶ |            |            | Eligible patients | Excluded (%) |            | Patients included | Data quality indicators (%) †† |                         |                   |            |
|------------------------------|-----------------|--------------------|------------------|------------|------------|-------------------|--------------|------------|-------------------|--------------------------------|-------------------------|-------------------|------------|
|                              |                 |                    | Incomplete dates | In situ    | Other      |                   | DCO          | Other      |                   | MV                             | Non-specific morphology | Lost to follow-up | Censored   |
| Zürich                       | 2000-2013       | 6,707              | 0.0              | 0.0        | 0.0        | 6,706             | 2.1          | 0.0        | 6,565             | 99.6                           | 0.8                     | 1.2               | 12.6       |
| Switzerland (Childhood) †    | -               | -                  |                  |            |            |                   |              |            |                   |                                |                         |                   |            |
| United Kingdom *             | 2000-2014       | 314,666            | 0.2              | 0.0        | 0.0        | 313,965           | 1.6          | 0.1        | 308,555           | 98.9                           | 4.9                     | 2.4               | 0.0        |
| England                      | 2000-2014       | 261,650            | 0.2              | 0.0        | 0.0        | 260,957           | 1.7          | 0.2        | 256,050           | 99.1                           | 4.7                     | 2.8               | 0.0        |
| Northern Ireland             | 2000-2014       | 8,031              | 0.0              | 0.0        | 0.0        | 8,029             | 0.8          | 0.1        | 7,961             | 97.3                           | 9.8                     | 0.0               | 0.0        |
| Scotland                     | 2000-2014       | 27,960             | 0.0              | 0.0        | 0.0        | 27,960            | 0.4          | 0.0        | 27,851            | 98.8                           | 4.6                     | 0.2               | 0.0        |
| Wales                        | 2000-2014       | 17,025             | 0.0              | 0.0        | 0.0        | 17,019            | 1.9          | 0.0        | 16,693            | 97.7                           | 6.1                     | 0.0               | 0.0        |
| <b>OCEANIA</b>               |                 | <b>132,071</b>     | <b>0.4</b>       | <b>0.0</b> | <b>0.1</b> | <b>131,394</b>    | <b>1.7</b>   | <b>0.0</b> | <b>129,127</b>    | <b>99.5</b>                    | <b>2.1</b>              | <b>0.0</b>        | <b>0.0</b> |
| Australia *                  | 2000-2014       | 111,016            | 0.5              | 0.0        | 0.1        | 110,339           | 1.5          | 0.0        | 108,727           | 99.4                           | 2.2                     | 0.0               | 0.0        |
| Australian Capital Territory | 2000-2013       | 1,406              | 0.0              | 0.0        | 0.1        | 1,405             | 1.1          | 0.0        | 1,390             | 99.6                           | 0.8                     | 0.0               | 0.1        |
| New South Wales              | 2000-2012       | 31,721             | 0.5              | 0.0        | 0.0        | 31,541            | 1.2          | 0.0        | 31,146            | 99.1                           | 2.4                     | 0.0               | 0.0        |
| Northern Territory           | 2000-2013       | 472                | 0.0              | 0.0        | 0.0        | 472               | 0.0          | 0.0        | 472               | 100.0                          | 0.6                     | 0.0               | 0.0        |
| Queensland                   | 2000-2014       | 23,762             | 1.7              | 0.0        | 0.3        | 23,280            | 1.1          | 0.0        | 23,027            | 99.0                           | 2.9                     | 0.0               | 0.0        |
| South Australia              | 2000-2013       | 9,900              | 0.1              | 0.0        | 0.0        | 9,895             | 0.1          | 0.0        | 9,886             | 99.7                           | 1.2                     | 0.0               | 0.0        |
| Tasmania                     | 2000-2013       | 2,830              | 0.0              | 0.0        | 0.2        | 2,825             | 1.1          | 0.0        | 2,793             | 99.4                           | 1.3                     | 0.0               | 0.0        |
| Victoria                     | 2000-2014       | 30,277             | 0.0              | 0.0        | 0.0        | 30,275            | 2.9          | 0.0        | 29,393            | 99.9                           | 2.1                     | 0.0               | 0.0        |
| Western Australia            | 2000-2014       | 10,648             | 0.0              | 0.0        | 0.0        | 10,646            | 0.2          | 0.0        | 10,620            | 99.6                           | 1.6                     | 0.0               | 0.0        |
| New Zealand *                | 2000-2014       | 21,055             | 0.0              | 0.0        | 0.0        | 21,055            | 3.1          | 0.0        | 20,400            | 100.0                          | 1.4                     | 0.0               | 0.0        |
| <b>Total</b>                 |                 | <b>3,104,293</b>   | <b>0.8</b>       | <b>0.0</b> | <b>0.2</b> | <b>3,075,926</b>  | <b>2.0</b>   | <b>0.1</b> | <b>3,011,054</b>  | <b>99.3</b>                    | <b>3.7</b>              | <b>1.2</b>        | <b>1.2</b> |

Web-table 2.16: Data quality indicators, children diagnosed during 2000-2014, by continent, country and registry: BRAIN (CHILDREN)

Back

|                                    | Calendar period | Patients submitted | Ineligible (%) ¶ |            |             | Eligible patients | Excluded (%) ¶¶ |             | Patients included | Data quality indicators (%) ¶¶ |                         |                   |             |
|------------------------------------|-----------------|--------------------|------------------|------------|-------------|-------------------|-----------------|-------------|-------------------|--------------------------------|-------------------------|-------------------|-------------|
|                                    |                 |                    | Incomplete dates | In situ    | Other       |                   | DCO             | Other       |                   | MV                             | Non-specific morphology | Lost to follow-up | Censored    |
| <b>AFRICA</b>                      |                 | <b>440</b>         | <b>10.7</b>      | <b>0.0</b> | <b>39.3</b> | <b>220</b>        | <b>6.8</b>      | <b>11.8</b> | <b>179</b>        | <b>88.8</b>                    | <b>26.3</b>             | <b>1.1</b>        | <b>36.9</b> |
| Algerian registries                | 2000-2014       | 323                | 2.5              | 0.0        | 53.6        | 142               | 7.7             | 15.5        | 109               | 90.8                           | 33.0                    | 0.0               | 17.4        |
| Annaba                             | 2000-2014       | 209                | 1.0              | 0.0        | 82.8        | 34                | 2.9             | 23.5        | 25                | 68.0                           | 0.0                     | 0.0               | 68.0        |
| Sétif                              | 2000-2012       | 54                 | 11.1             | 0.0        | 0.0         | 48                | 0.0             | 20.8        | 38                | 94.7                           | 36.8                    | 0.0               | 5.3         |
| Tlemcen                            | 2006-2014       | 60                 | 0.0              | 0.0        | 0.0         | 60                | 16.7            | 6.7         | 46                | 100.0                          | 47.8                    | 0.0               | 0.0         |
| Mali (Bamako)                      | -               | -                  | -                | -          | -           | -                 | -               | -           | -                 | -                              | -                       | -                 | -           |
| Mauritius *                        | 2011-2012       | 5                  | 0.0              | 0.0        | 0.0         | 5                 | 0.0             | 40.0        | 3                 | 100.0                          | 0.0                     | 0.0               | 0.0         |
| Morocco (Casablanca)               | -               | -                  | -                | -          | -           | -                 | -               | -           | -                 | -                              | -                       | -                 | -           |
| Nigeria (Ibadan)                   | 2005-2014       | 89                 | 43.8             | 0.0        | 0.0         | 50                | 8.0             | 2.0         | 45                | 88.9                           | 11.1                    | 0.0               | 71.1        |
| South Africa (Eastern Cape)        | 2000-2014       | 23                 | 0.0              | 0.0        | 0.0         | 23                | 0.0             | 4.3         | 22                | 77.3                           | 27.3                    | 9.1               | 68.2        |
| <b>AMERICA (Central and South)</b> |                 | <b>5,503</b>       | <b>2.4</b>       | <b>0.0</b> | <b>1.2</b>  | <b>5,305</b>      | <b>5.9</b>      | <b>1.0</b>  | <b>4,936</b>      | <b>91.1</b>                    | <b>11.5</b>             | <b>2.6</b>        | <b>12.6</b> |
| Argentinian registries             | 2000-2013       | 2,958              | 0.0              | 0.0        | 0.0         | 2,957             | 9.2             | 0.7         | 2,662             | 88.2                           | 15.9                    | 0.0               | 16.7        |
| Chubut                             | -               | -                  | -                | -          | -           | -                 | -               | -           | -                 | -                              | -                       | -                 | -           |
| Córdoba                            | -               | -                  | -                | -          | -           | -                 | -               | -           | -                 | -                              | -                       | -                 | -           |
| Mendoza                            | 2003-2013       | -                  | -                | -          | -           | -                 | -               | -           | -                 | -                              | -                       | -                 | -           |
| Tierra del Fuego                   | -               | -                  | -                | -          | -           | -                 | -               | -           | -                 | -                              | -                       | -                 | -           |
| Argentina (Childhood) †            | 2000-2013       | 2,958              | 0.0              | 0.0        | 0.0         | 2,957             | 9.2             | 0.7         | 2,662             | 88.2                           | 15.9                    | 0.0               | 16.7        |
| Brazilian registries               | 2000-2013       | 179                | 0.0              | 0.0        | 0.0         | 179               | 5.6             | 0.6         | 168               | 92.3                           | 8.9                     | 0.0               | 0.6         |
| Aracaju                            | 2000-2012       | 45                 | 0.0              | 0.0        | 0.0         | 45                | 4.4             | 0.0         | 43                | 74.4                           | 25.6                    | 0.0               | 0.0         |
| Cuiabá                             | -               | -                  | -                | -          | -           | -                 | -               | -           | -                 | -                              | -                       | -                 | -           |
| Curitiba                           | 2000-2012       | 124                | 0.0              | 0.0        | 0.0         | 124               | 6.5             | 0.8         | 115               | 98.3                           | 3.5                     | 0.0               | 0.0         |
| Goiânia                            | -               | -                  | -                | -          | -           | -                 | -               | -           | -                 | -                              | -                       | -                 | -           |
| Juá                                | 2001-2013       | 10                 | 0.0              | 0.0        | 0.0         | 10                | 0.0             | 0.0         | 10                | 100.0                          | 0.0                     | 0.0               | 10.0        |
| São Paulo                          | -               | -                  | -                | -          | -           | -                 | -               | -           | -                 | -                              | -                       | -                 | -           |
| Chilean registries                 | 2000-2012       | 88                 | 0.0              | 0.0        | 0.0         | 88                | 1.1             | 4.5         | 83                | 78.3                           | 13.3                    | 0.0               | 16.9        |
| Antofagasta                        | 2004-2010       | 17                 | 0.0              | 0.0        | 0.0         | 17                | 5.9             | 5.9         | 15                | 93.3                           | 6.7                     | 0.0               | 0.0         |
| Biobio                             | 2003-2011       | 23                 | 0.0              | 0.0        | 0.0         | 23                | 0.0             | 8.7         | 21                | 66.7                           | 33.3                    | 0.0               | 19.0        |
| Concepción                         | 2006-2010       | 25                 | 0.0              | 0.0        | 0.0         | 25                | 0.0             | 4.0         | 24                | 87.5                           | 12.5                    | 0.0               | 41.7        |
| Los Rios                           | 2000-2012       | 23                 | 0.0              | 0.0        | 0.0         | 23                | 0.0             | 0.0         | 23                | 69.6                           | 0.0                     | 0.0               | 0.0         |
| Colombian registries               | 2000-2014       | 267                | 1.9              | 0.0        | 1.5         | 258               | 2.7             | 3.1         | 243               | 88.5                           | 11.9                    | 0.0               | 17.3        |
| Bucaramanga                        | -               | -                  | -                | -          | -           | -                 | -               | -           | -                 | -                              | -                       | -                 | -           |
| Cali                               | 2000-2014       | 224                | 0.0              | 0.0        | 0.9         | 222               | 1.8             | 3.2         | 211               | 89.6                           | 10.9                    | 0.0               | 19.0        |
| Manizales                          | 2004-2012       | 12                 | 8.3              | 0.0        | 8.3         | 10                | 10.0            | 0.0         | 9                 | 66.7                           | 33.3                    | 0.0               | 11.1        |
| Pasto                              | 2001-2012       | 31                 | 12.9             | 0.0        | 3.2         | 26                | 7.7             | 3.8         | 23                | 87.0                           | 13.0                    | 0.0               | 4.3         |
| Costa Rica *                       | 2002-2014       | 163                | 0.0              | 0.0        | 0.6         | 162               | 1.9             | 3.7         | 153               | 82.4                           | 23.5                    | 0.0               | 0.0         |
| Cuba *                             | -               | -                  | -                | -          | -           | -                 | -               | -           | -                 | -                              | -                       | -                 | -           |
| Ecuadorian registries              | 2000-2013       | 389                | 10.3             | 0.0        | 0.3         | 348               | 4.0             | 2.9         | 324               | 88.9                           | 12.7                    | 0.9               | 9.6         |
| Cuenca                             | 2000-2012       | 31                 | 16.1             | 0.0        | 0.0         | 26                | 0.0             | 0.0         | 26                | 92.3                           | 7.7                     | 0.0               | 34.6        |
| Guayaquil                          | 2005-2013       | 153                | 0.0              | 0.0        | 0.7         | 152               | 5.3             | 6.6         | 134               | 79.9                           | 21.6                    | 0.0               | 0.0         |
| Loja                               | 2000-2013       | 16                 | 0.0              | 0.0        | 0.0         | 16                | 0.0             | 0.0         | 16                | 93.8                           | 6.3                     | 18.8              | 0.0         |
| Manabí                             | 2001-2013       | 56                 | 14.3             | 0.0        | 0.0         | 48                | 10.4            | 0.0         | 43                | 93.0                           | 7.0                     | 0.0               | 16.3        |
| Quito                              | 2000-2013       | 133                | 20.3             | 0.0        | 0.0         | 106               | 0.9             | 0.0         | 105               | 97.1                           | 5.7                     | 0.0               | 14.3        |
| Guadeloupe *                       | 2008-2013       | 14                 | 0.0              | 0.0        | 0.0         | 14                | 0.0             | 0.0         | 14                | 100.0                          | 0.0                     | 0.0               | 50.0        |
| Martinique *                       | 2000-2012       | 20                 | 0.0              | 0.0        | 0.0         | 20                | 0.0             | 0.0         | 20                | 100.0                          | 0.0                     | 0.0               | 25.0        |
| Mexico (Childhood) †               | 2008-2014       | 1,185              | 6.6              | 0.0        | 5.0         | 1,048             | 0.0             | 0.1         | 1,047             | 99.7                           | 0.0                     | 12.1              | 7.4         |
| Peru (Lima)                        | -               | -                  | -                | -          | -           | -                 | -               | -           | -                 | -                              | -                       | -                 | -           |
| Puerto Rico *                      | 2000-2011       | 240                | 3.8              | 0.0        | 0.0         | 231               | 2.6             | 1.3         | 222               | 99.1                           | 4.5                     | 0.0               | 0.0         |
| Uruguay *                          | -               | -                  | -                | -          | -           | -                 | -               | -           | -                 | -                              | -                       | -                 | -           |
| <b>AMERICA (North)</b>             |                 | <b>28,580</b>      | <b>0.6</b>       | <b>0.0</b> | <b>0.4</b>  | <b>28,316</b>     | <b>0.4</b>      | <b>3.7</b>  | <b>27,157</b>     | <b>97.5</b>                    | <b>3.3</b>              | <b>3.1</b>        | <b>0.0</b>  |
| Canadian registries                | 2000-2014       | 2,268              | 0.1              | 0.0        | 0.2         | 2,260             | 0.5             | 2.3         | 2,196             | 91.1                           | 9.2                     | 0.0               | 0.0         |
| Alberta                            | 2000-2014       | 321                | 0.3              | 0.0        | 0.3         | 319               | 0.6             | 5.3         | 300               | 99.3                           | 1.3                     | 0.0               | 0.0         |
| British Columbia                   | 2000-2014       | 343                | 0.3              | 0.0        | 0.9         | 339               | 1.2             | 5.0         | 318               | 98.1                           | 2.2                     | 0.0               | 0.0         |
| Manitoba                           | 2000-2014       | 97                 | 0.0              | 0.0        | 0.0         | 97                | 1.0             | 1.0         | 95                | 96.8                           | 3.2                     | 0.0               | 0.0         |
| New Brunswick                      | 2000-2014       | 52                 | 0.0              | 0.0        | 0.0         | 52                | 0.0             | 1.9         | 51                | 86.3                           | 0.0                     | 0.0               | 0.0         |
| Newfoundland & Labrador            | 2000-2014       | 40                 | 0.0              | 0.0        | 0.0         | 40                | 2.5             | 0.0         | 39                | 97.4                           | 2.6                     | 0.0               | 0.0         |
| Nova Scotia                        | 2000-2014       | 57                 | 1.8              | 0.0        | 0.0         | 56                | 0.0             | 1.8         | 55                | 100.0                          | 0.0                     | 0.0               | 0.0         |
| Ontario                            | 2000-2014       | 1,257              | 0.0              | 0.0        | 0.0         | 1,257             | 0.2             | 1.0         | 1,241             | 85.8                           | 15.1                    | 0.0               | 0.0         |
| Prince Edward Island               | 2004-2012       | 7                  | 0.0              | 0.0        | 0.0         | 7                 | 0.0             | 14.3        | 6                 | 100.0                          | 0.0                     | 0.0               | 0.0         |
| Saskatchewan                       | 2000-2014       | 94                 | 0.0              | 0.0        | 1.1         | 93                | 1.1             | 1.1         | 91                | 100.0                          | 0.0                     | 0.0               | 0.0         |
| US registries                      | 2000-2014       | 26,312             | 0.6              | 0.0        | 0.4         | 26,056            | 0.4             | 3.8         | 24,961            | 98.1                           | 2.8                     | 3.3               | 0.0         |
| Alabama                            | 2000-2014       | 467                | 0.2              | 0.0        | 0.2         | 465               | 0.2             | 4.9         | 441               | 98.0                           | 3.2                     | 0.0               | 0.0         |
| Alaska                             | 2000-2013       | 63                 | 3.2              | 0.0        | 1.6         | 60                | 0.0             | 1.7         | 59                | 96.6                           | 3.4                     | 0.0               | 0.0         |
| Arkansas                           | 2000-2011       | 246                | 0.0              | 0.0        | 0.0         | 246               | 0.4             | 1.6         | 241               | 95.9                           | 5.8                     | 0.0               | 0.0         |
| California                         | 2000-2011       | 3,002              | 0.5              | 0.0        | 0.4         | 2,977             | 0.3             | 4.5         | 2,835             | 99.3                           | 1.1                     | 0.0               | 0.0         |
| Greater Bay Area                   | 2000-2014       | 628                | 0.3              | 0.0        | 0.5         | 623               | 0.3             | 3.0         | 602               | 99.3                           | 1.8                     | 11.3              | 0.0         |
| Greater California                 | 2000-2014       | 2,230              | 0.5              | 0.0        | 0.4         | 2,210             | 0.3             | 5.0         | 2,093             | 98.8                           | 1.9                     | 16.1              | 0.0         |
| Los Angeles                        | 2000-2014       | 930                | 0.3              | 0.0        | 0.8         | 920               | 0.2             | 4.9         | 873               | 99.8                           | 0.5                     | 24.9              | 0.0         |
| Colorado                           | 2000-2013       | 457                | 0.4              | 0.0        | 0.0         | 455               | 0.7             | 5.1         | 429               | 98.4                           | 2.8                     | 0.0               | 0.0         |
| Connecticut                        | 2000-2014       | 409                | 1.0              | 0.0        | 0.7         | 402               | 0.7             | 3.0         | 387               | 97.7                           | 3.6                     | 19.9              | 0.0         |
| Delaware                           | 2000-2014       | 109                | 0.0              | 0.0        | 0.9         | 108               | 0.0             | 3.7         | 104               | 96.2                           | 4.8                     | 0.0               | 0.0         |
| Florida                            | 2000-2013       | 1,749              | 0.0              | 0.0        | 0.5         | 1,741             | 0.4             | 1.5         | 1,708             | 98.2                           | 3.0                     | 0.0               | 0.1         |
| Georgia                            | 2000-2014       | 1,032              | 0.0              | 0.0        | 0.1         | 1,031             | 0.7             | 1.5         | 1,009             | 97.9                           | 3.2                     | 0.0               | 0.0         |
| Atlanta                            | 2000-2014       | 334                | 0.0              | 0.0        | 0.3         | 333               | 0.9             | 0.9         | 327               | 98.5                           | 2.8                     | 0.0               | 0.0         |
| Hawaii                             | 2000-2014       | 106                | 0.9              | 0.0        | 0.0         | 105               | 1.0             | 2.9         | 101               | 98.0                           | 3.0                     | 17.8              | 0.0         |
| Idaho                              | 2000-2014       | 173                | 0.0              | 0.0        | 0.6         | 172               | 0.6             | 4.7         | 163               | 99.4                           | 0.6                     | 0.0               | 0.0         |
| Indiana                            | 2000-2014       | 754                | 0.3              | 0.0        | 0.3         | 750               | 0.4             | 5.1         | 709               | 98.7                           | 1.6                     | 0.0               | 0.0         |
| Iowa                               | 2000-2014       | 384                | 0.3              | 0.0        | 0.3         | 382               | 1.0             | 3.4         | 365               | 98.1                           | 2.2                     | 3.6               | 0.0         |
| Kentucky                           | 2000-2014       | 516                | 0.0              | 0.0        | 0.0         | 516               | 0.2             | 1.7         | 506               | 99.2                           | 1.8                     | 10.7              | 0.0         |
| Louisiana                          | 2000-2014       | 534                | 0.7              | 0.0        | 0.9         | 525               | 0.4             | 3.8         | 503               | 96.8                           | 6.0                     | 28.6              | 0.0         |
| Maine                              | 2000-2013       | 125                | 0.8              | 0.0        | 0.0         | 124               | 0.0             | 3.2         | 120               | 100.0                          | 0.0                     | 0.0               | 0.0         |
| Massachusetts                      | 2000-2009       | 452                | 0.0              | 0.0        | 0.2         | 451               | 0.2             | 6.7         | 420               | 98.8                           | 2.9                     | 0.0               | 0.0         |
| Michigan                           | 2000-2013       | 1,038              | 0.4              | 0.0        | 0.9         | 1,025             | 0.1             | 5.2         | 971               | 98.4                           | 2.6                     | 0.0               | 0.0         |

Web-table 2.16: Data quality indicators, children diagnosed during 2000-2014, by continent, country and registry: BRAIN (CHILDREN)

|                     | Calendar period | Patients submitted | Ineligible (%) ¶ |            |            | Eligible patients | Excluded (%) ¶¶ |            | Patients included | Data quality indicators (%) ¶¶ |                         |                   |            |
|---------------------|-----------------|--------------------|------------------|------------|------------|-------------------|-----------------|------------|-------------------|--------------------------------|-------------------------|-------------------|------------|
|                     |                 |                    | Incomplete dates | In situ    | Other      |                   | DCO             | Other      |                   | MV                             | Non-specific morphology | Lost to follow-up | Censored   |
| Detroit             | 2000-2014       | 435                | 0.5              | 0.0        | 0.7        | 430               | 0.7             | 3.3        | 413               | 99.8                           | 0.7                     | 9.9               | 0.0        |
| Minnesota           | 2000-2013       | 532                | 0.0              | 0.0        | 0.8        | 528               | 1.3             | 8.9        | 474               | 99.8                           | 0.4                     | 0.0               | 0.0        |
| Mississippi         | 2002-2014       | 261                | 1.1              | 0.0        | 0.4        | 257               | 0.0             | 3.1        | 249               | 99.2                           | 2.4                     | 0.0               | 0.0        |
| Missouri            | -               | -                  | -                | -          | -          | -                 | -               | -          | -                 | -                              | -                       | -                 | -          |
| Montana             | 2000-2014       | 80                 | 2.5              | 0.0        | 0.0        | 78                | 2.6             | 2.6        | 74                | 100.0                          | 0.0                     | 0.0               | 0.0        |
| Nebraska            | 2000-2014       | 254                | 1.6              | 0.0        | 0.4        | 249               | 0.0             | 6.0        | 234               | 96.6                           | 4.7                     | 0.0               | 0.0        |
| New Hampshire       | 2000-2014       | 155                | 0.0              | 0.0        | 0.0        | 155               | 0.6             | 4.5        | 147               | 100.0                          | 0.0                     | 0.0               | 0.0        |
| New Jersey          | 2000-2014       | 1,001              | 1.4              | 0.0        | 0.7        | 980               | 0.3             | 2.4        | 953               | 98.4                           | 3.0                     | 44.0              | 0.0        |
| New Mexico          | 2000-2014       | 173                | 0.0              | 0.0        | 0.6        | 172               | 1.7             | 3.5        | 163               | 96.3                           | 4.9                     | 23.3              | 1.8        |
| New York            | 2000-2014       | 2,189              | 2.1              | 0.0        | 0.5        | 2,133             | 0.2             | 2.1        | 2,083             | 97.6                           | 3.3                     | 0.0               | 0.0        |
| New York City       | 2000-2014       | 899                | 2.6              | 0.0        | 0.7        | 870               | 0.1             | 1.7        | 854               | 97.2                           | 3.5                     | 0.0               | 0.0        |
| North Carolina      | 2000-2014       | 963                | 0.0              | 0.0        | 0.1        | 962               | 0.6             | 2.9        | 928               | 98.5                           | 2.4                     | 0.0               | 0.0        |
| Ohio                | 2000-2014       | 1,355              | 0.2              | 0.0        | 0.2        | 1,349             | 0.4             | 5.5        | 1,269             | 98.7                           | 2.0                     | 0.0               | 0.0        |
| Oklahoma            | 2000-2010       | 261                | 0.0              | 0.0        | 0.0        | 261               | 0.0             | 0.8        | 259               | 97.7                           | 4.2                     | 0.0               | 0.0        |
| Oregon              | 2000-2013       | 377                | 0.0              | 0.0        | 0.0        | 377               | 0.5             | 8.0        | 345               | 98.8                           | 1.4                     | 0.0               | 0.0        |
| Pennsylvania        | 2000-2014       | 1,346              | 0.5              | 0.0        | 0.4        | 1,333             | 0.5             | 3.8        | 1,276             | 98.6                           | 2.1                     | 0.0               | 0.0        |
| Rhode Island        | 2000-2014       | 108                | 0.0              | 0.0        | 0.0        | 108               | 0.0             | 2.8        | 105               | 100.0                          | 0.0                     | 0.0               | 0.0        |
| South Carolina      | 2000-2014       | 427                | 0.0              | 0.0        | 0.7        | 424               | 0.7             | 4.7        | 401               | 97.0                           | 4.0                     | 0.0               | 0.0        |
| Tennessee           | 2000-2011       | 534                | 0.4              | 0.0        | 0.4        | 530               | 0.2             | 7.4        | 490               | 98.2                           | 3.7                     | 0.0               | 0.0        |
| Texas               | 2000-2013       | 2,960              | 0.9              | 0.0        | 0.5        | 2,917             | 0.6             | 3.3        | 2,803             | 96.0                           | 4.9                     | 0.0               | 0.0        |
| Utah                | 2000-2014       | 411                | 0.0              | 0.0        | 0.2        | 410               | 0.0             | 6.8        | 382               | 99.7                           | 1.3                     | 18.6              | 0.5        |
| Vermont             | 2000-2013       | 38                 | 0.0              | 0.0        | 0.0        | 38                | 0.0             | 7.9        | 35                | 100.0                          | 5.7                     | 0.0               | 0.0        |
| Washington          | 2000-2008       | 435                | 0.7              | 0.0        | 0.0        | 432               | 0.0             | 2.1        | 423               | 98.1                           | 2.1                     | 0.0               | 0.0        |
| Seattle             | 2000-2014       | 563                | 0.9              | 0.0        | 0.2        | 557               | 0.0             | 1.1        | 551               | 98.2                           | 1.8                     | 19.1              | 0.0        |
| West Virginia       | 2000-2014       | 212                | 0.5              | 0.0        | 0.0        | 211               | 0.9             | 4.7        | 199               | 99.0                           | 1.5                     | 0.0               | 0.0        |
| Wisconsin           | 2000-2013       | 572                | 1.2              | 0.0        | 0.0        | 565               | 0.2             | 2.8        | 548               | 97.6                           | 2.9                     | 0.0               | 0.0        |
| Wyoming             | 2000-2013       | 52                 | 0.0              | 0.0        | 0.0        | 52                | 0.0             | 3.8        | 50                | 94.0                           | 10.0                    | 0.0               | 0.0        |
| <b>ASIA</b>         |                 | <b>9,029</b>       | <b>0.5</b>       | <b>0.0</b> | <b>0.5</b> | <b>8,944</b>      | <b>1.8</b>      | <b>3.1</b> | <b>8,513</b>      | <b>88.0</b>                    | <b>10.5</b>             | <b>0.9</b>        | <b>1.3</b> |
| Chinese registries  | 2003-2013       | 540                | 0.0              | 0.2        | 0.2        | 538               | 2.0             | 0.2        | 526               | 57.0                           | 47.3                    | 7.4               | 0.2        |
| Beijing             | 2003-2013       | 142                | 0.0              | 0.0        | 0.0        | 142               | 0.7             | 0.7        | 140               | 77.9                           | 22.1                    | 17.1              | 0.7        |
| Changle             | 2003-2013       | 12                 | 0.0              | 0.0        | 0.0        | 12                | 0.0             | 0.0        | 12                | 75.0                           | 33.3                    | 16.7              | 0.0        |
| Cixian              | 2003-2012       | 15                 | 0.0              | 0.0        | 0.0        | 15                | 6.7             | 0.0        | 14                | 100.0                          | 0.0                     | 0.0               | 0.0        |
| Dafeng              | 2006-2013       | 7                  | 0.0              | 0.0        | 0.0        | 7                 | 0.0             | 0.0        | 7                 | 42.9                           | 71.4                    | 0.0               | 0.0        |
| Dalian              | 2003-2013       | 36                 | 0.0              | 0.0        | 0.0        | 36                | 8.3             | 0.0        | 33                | 69.7                           | 30.3                    | 0.0               | 0.0        |
| Donghai             | 2005-2013       | 27                 | 0.0              | 0.0        | 0.0        | 27                | 3.7             | 0.0        | 26                | 34.6                           | 69.2                    | 7.7               | 0.0        |
| Feicheng            | 2003-2013       | 19                 | 0.0              | 0.0        | 0.0        | 19                | 0.0             | 0.0        | 19                | 42.1                           | 78.9                    | 5.3               | 0.0        |
| Ganyu               | 2003-2013       | 24                 | 0.0              | 0.0        | 0.0        | 24                | 0.0             | 0.0        | 24                | 4.2                            | 95.8                    | 12.5              | 0.0        |
| Guanyun             | 2004-2013       | 24                 | 0.0              | 0.0        | 0.0        | 24                | 8.3             | 0.0        | 22                | 31.8                           | 81.8                    | 9.1               | 0.0        |
| Haimen              | 2003-2013       | 34                 | 0.0              | 0.0        | 2.9        | 33                | 3.0             | 0.0        | 32                | 53.1                           | 56.3                    | 3.1               | 0.0        |
| Haining             | 2003-2013       | 10                 | 0.0              | 0.0        | 0.0        | 10                | 0.0             | 0.0        | 10                | 50.0                           | 80.0                    | 10.0              | 0.0        |
| Jianhu              | 2003-2013       | 17                 | 0.0              | 0.0        | 0.0        | 17                | 0.0             | 0.0        | 17                | 11.8                           | 88.2                    | 0.0               | 0.0        |
| Jiashan             | 2003-2012       | 14                 | 0.0              | 0.0        | 0.0        | 14                | 0.0             | 0.0        | 14                | 64.3                           | 35.7                    | 0.0               | 0.0        |
| Jintan              | 2006-2011       | 2                  | 0.0              | 0.0        | 0.0        | 2                 | 0.0             | 0.0        | 2                 | 0.0                            | 100.0                   | 0.0               | 0.0        |
| Lianyungang         | 2008-2013       | 11                 | 0.0              | 0.0        | 0.0        | 11                | 9.1             | 0.0        | 10                | 80.0                           | 30.0                    | 30.0              | 0.0        |
| Linzhou             | 2003-2013       | 32                 | 0.0              | 0.0        | 0.0        | 32                | 3.1             | 0.0        | 31                | 29.0                           | 71.0                    | 0.0               | 0.0        |
| Qidong              | 2004-2013       | 21                 | 0.0              | 0.0        | 0.0        | 21                | 0.0             | 0.0        | 21                | 14.3                           | 85.7                    | 0.0               | 0.0        |
| Sihui               | 2006-2013       | 18                 | 0.0              | 5.6        | 0.0        | 17                | 0.0             | 0.0        | 17                | 41.2                           | 64.7                    | 0.0               | 0.0        |
| Taixing             | 2003-2009       | 8                  | 0.0              | 0.0        | 0.0        | 8                 | 0.0             | 0.0        | 8                 | 0.0                            | 100.0                   | 0.0               | 0.0        |
| Yangzhong           | -               | -                  | -                | -          | -          | -                 | -               | -          | -                 | -                              | -                       | -                 | -          |
| Zhongshan           | 2003-2013       | 67                 | 0.0              | 0.0        | 0.0        | 67                | 0.0             | 0.0        | 67                | 85.1                           | 22.4                    | 0.0               | 0.0        |
| Cyprus *            | 2004-2014       | 20                 | 0.0              | 0.0        | 0.0        | 20                | 10.0            | 20.0       | 14                | 85.7                           | 14.3                    | 0.0               | 42.9       |
| Hong Kong *         | -               | -                  | -                | -          | -          | -                 | -               | -          | -                 | -                              | -                       | -                 | -          |
| Indian registries   | 2002-2014       | 21                 | 0.0              | 0.0        | 0.0        | 21                | 0.0             | 14.3       | 18                | 72.2                           | 27.8                    | 5.6               | 0.0        |
| Guwahati            | -               | -                  | -                | -          | -          | -                 | -               | -          | -                 | -                              | -                       | -                 | -          |
| Karunagappally      | 2002-2014       | 21                 | 0.0              | 0.0        | 0.0        | 21                | 0.0             | 14.3       | 18                | 72.2                           | 27.8                    | 5.6               | 0.0        |
| Iran (Golestan)     | -               | -                  | -                | -          | -          | -                 | -               | -          | -                 | -                              | -                       | -                 | -          |
| Israel *            | 2000-2013       | 879                | 0.0              | 0.0        | 0.9        | 871               | 2.8             | 0.5        | 843               | 96.7                           | 4.3                     | 0.0               | 0.0        |
| Japanese registries | 2000-2014       | 1,409              | 0.6              | 0.0        | 0.6        | 1,392             | 6.4             | 0.7        | 1,293             | 88.3                           | 11.9                    | 0.0               | 2.4        |
| Aichi               | 2003-2013       | 278                | 0.4              | 0.0        | 0.7        | 275               | 2.9             | 0.0        | 267               | 87.3                           | 13.9                    | 0.0               | 3.7        |
| Akita               | 2012-2014       | 12                 | 16.7             | 0.0        | 0.0        | 10                | 0.0             | 0.0        | 10                | 70.0                           | 30.0                    | 0.0               | 20.0       |
| Ehime               | 2007-2013       | 33                 | 0.0              | 0.0        | 6.1        | 31                | 6.5             | 0.0        | 29                | 79.3                           | 24.1                    | 0.0               | 0.0        |
| Fukui               | 2003-2009       | 24                 | 0.0              | 0.0        | 0.0        | 24                | 0.0             | 0.0        | 24                | 91.7                           | 8.3                     | 0.0               | 4.2        |
| Gunma               | 2003-2011       | 51                 | 7.8              | 0.0        | 0.0        | 47                | 12.8            | 8.5        | 37                | 67.6                           | 2.7                     | 0.0               | 2.7        |
| Hiroshima           | 2004-2008       | 54                 | 0.0              | 0.0        | 0.0        | 54                | 3.7             | 0.0        | 52                | 92.3                           | 7.7                     | 0.0               | 3.8        |
| Hyogo               | 2007-2012       | 92                 | 0.0              | 0.0        | 1.1        | 91                | 9.9             | 0.0        | 82                | 87.8                           | 12.2                    | 0.0               | 0.0        |
| Ibaraki             | 2006-2012       | 53                 | 0.0              | 0.0        | 0.0        | 53                | 3.8             | 0.0        | 51                | 92.2                           | 7.8                     | 0.0               | 3.9        |
| Kanagawa            | 2000-2013       | 220                | 0.0              | 0.0        | 0.0        | 220               | 25.5            | 0.9        | 162               | 90.7                           | 14.2                    | 0.0               | 0.0        |
| Miyagi              | 2000-2010       | 100                | 0.0              | 0.0        | 0.0        | 100               | 0.0             | 0.0        | 100               | 90.0                           | 11.0                    | 0.0               | 0.0        |
| Niigata             | 2000-2013       | 97                 | 0.0              | 0.0        | 0.0        | 97                | 1.0             | 4.1        | 92                | 95.7                           | 0.0                     | 0.0               | 0.0        |
| Osaka               | 2000-2008       | 250                | 0.0              | 0.0        | 0.8        | 248               | 0.0             | 0.0        | 248               | 88.7                           | 12.9                    | 0.0               | 5.2        |
| Saga                | 2007-2012       | 27                 | 0.0              | 0.0        | 0.0        | 27                | 3.7             | 0.0        | 26                | 92.3                           | 7.7                     | 0.0               | 0.0        |
| Tochigi             | 2006-2013       | 62                 | 3.2              | 0.0        | 1.6        | 59                | 1.7             | 0.0        | 58                | 77.6                           | 24.1                    | 0.0               | 0.0        |
| Yamagata            | 2003-2013       | 42                 | 0.0              | 0.0        | 0.0        | 42                | 0.0             | 0.0        | 42                | 92.9                           | 7.1                     | 0.0               | 0.0        |
| Yamanashi           | 2008-2012       | 14                 | 0.0              | 0.0        | 0.0        | 14                | 7.1             | 0.0        | 13                | 92.3                           | 7.7                     | 0.0               | 0.0        |
| Jordan *            | 2000-2014       | 534                | 0.0              | 0.0        | 0.2        | 533               | 0.6             | 7.7        | 489               | 98.4                           | 4.3                     | 6.1               | 0.0        |
| Korea * ‡           | 2000-2014       | 2,381              | 0.6              | 0.0        | 0.0        | 2,366             | 0.0             | 1.4        | 2,333             | 89.0                           | 11.7                    | 0.0               | 0.0        |
| Kuwait *            | 2001-2012       | 57                 | 0.0              | 0.0        | 0.0        | 57                | 8.8             | 5.3        | 49                | 100.0                          | 0.0                     | 2.0               | 0.0        |
| Malaysia (Penang)   | 2000-2013       | 98                 | 0.0              | 0.0        | 0.0        | 98                | 3.1             | 11.2       | 84                | 96.4                           | 7.1                     | 0.0               | 28.6       |
| Mongolia *          | -               | -                  | -                | -          | -          | -                 | -               | -          | -                 | -                              | -                       | -                 | -          |
| Qatar *             | 2002-2014       | 44                 | 0.0              | 2.3        | 0.0        | 43                | 0.0             | 23.3       | 33                | 93.9                           | 12.1                    | 0.0               | 33.3       |
| Singapore *         | 2000-2014       | 224                | 0.0              | 0.0        | 0.0        | 224               | 0.4             | 12.1       | 196               | 92.3                           | 2.6                     | 0.0               | 0.0        |
| Taiwan *            | 2000-2014       | 1,215              | 0.1              | 0.0        | 0.0        | 1,214             | 0.0             | 0.2        | 1,211             | 83.9                           | 0.2                     | 0.0               | 0.1        |

Web-table 2.16: Data quality indicators, children diagnosed during 2000-2014, by continent, country and registry: BRAIN (CHILDREN)

|                                | Calendar period | Patients submitted | Ineligible (%) ¶ |            |            | Eligible patients | Excluded (%) ¶¶ |            | Patients included | Data quality indicators (%) †† |                         |                   |            |
|--------------------------------|-----------------|--------------------|------------------|------------|------------|-------------------|-----------------|------------|-------------------|--------------------------------|-------------------------|-------------------|------------|
|                                |                 |                    | Incomplete dates | In situ    | Other      |                   | DCO             | Other      |                   | MV                             | Non-specific morphology | Lost to follow-up | Censored   |
| Thai registries                | 2000-2014       | 469                | 0.0              | 0.0        | 0.0        | 469               | 3.6             | 14.3       | 385               | 84.7                           | 15.3                    | 0.0               | 2.3        |
| Bangkok                        | 2001-2012       | 238                | 0.0              | 0.0        | 0.0        | 238               | 2.5             | 26.1       | 170               | 98.2                           | 1.8                     | 0.0               | 0.0        |
| Khon Kaen                      | 2000-2014       | 74                 | 0.0              | 0.0        | 0.0        | 74                | 4.1             | 1.4        | 70                | 85.7                           | 14.3                    | 0.0               | 0.0        |
| Lampang                        | 2001-2014       | 34                 | 0.0              | 0.0        | 0.0        | 34                | 2.9             | 8.8        | 30                | 53.3                           | 46.7                    | 0.0               | 0.0        |
| Lamphun                        | 2000-2013       | 29                 | 0.0              | 0.0        | 0.0        | 29                | 13.8            | 3.4        | 24                | 58.3                           | 41.7                    | 0.0               | 0.0        |
| Lopburi                        | 2000-2013       | 30                 | 0.0              | 0.0        | 0.0        | 30                | 6.7             | 0.0        | 28                | 64.3                           | 35.7                    | 0.0               | 25.0       |
| Songkhla                       | 2000-2014       | 64                 | 0.0              | 0.0        | 0.0        | 64                | 1.6             | 0.0        | 63                | 81.0                           | 19.0                    | 0.0               | 3.2        |
| Turkish registries             | 2000-2013       | 1,138              | 1.4              | 0.0        | 2.1        | 1,098             | 0.2             | 5.2        | 1,039             | 93.6                           | 7.0                     | 0.6               | 2.7        |
| Ankara                         | 2008-2012       | 487                | 0.0              | 0.0        | 1.4        | 480               | 0.0             | 7.5        | 444               | 94.8                           | 6.3                     | 0.0               | 2.5        |
| Antalya                        | 2006-2012       | 118                | 0.8              | 0.0        | 0.0        | 117               | 0.0             | 1.7        | 115               | 93.0                           | 7.8                     | 0.0               | 0.9        |
| Bursa                          | 2006-2012       | 87                 | 11.5             | 0.0        | 19.5       | 60                | 0.0             | 1.7        | 59                | 91.5                           | 8.5                     | 0.0               | 0.0        |
| Edirne                         | 2006-2012       | 8                  | 0.0              | 0.0        | 0.0        | 8                 | 0.0             | 12.5       | 7                 | 100.0                          | 0.0                     | 0.0               | 0.0        |
| Erzurum                        | 2007-2012       | 29                 | 0.0              | 0.0        | 0.0        | 29                | 0.0             | 6.9        | 27                | 88.9                           | 22.2                    | 0.0               | 0.0        |
| Eskisehir                      | 2006-2012       | 15                 | 0.0              | 0.0        | 0.0        | 15                | 0.0             | 0.0        | 15                | 66.7                           | 0.0                     | 6.7               | 0.0        |
| Izmir                          | 2000-2013       | 312                | 1.6              | 0.0        | 0.0        | 307               | 0.7             | 4.6        | 291               | 95.9                           | 4.8                     | 0.0               | 5.5        |
| Samsun                         | 2006-2012       | 57                 | 0.0              | 0.0        | 0.0        | 57                | 0.0             | 0.0        | 57                | 86.0                           | 14.0                    | 8.8               | 0.0        |
| Trabzon                        | 2006-2012       | 25                 | 0.0              | 0.0        | 0.0        | 25                | 0.0             | 4.0        | 24                | 87.5                           | 12.5                    | 0.0               | 0.0        |
| <b>EUROPE</b>                  |                 | <b>25,110</b>      | <b>0.0</b>       | <b>0.0</b> | <b>0.8</b> | <b>24,898</b>     | <b>0.4</b>      | <b>1.9</b> | <b>24,316</b>     | <b>92.9</b>                    | <b>4.7</b>              | <b>1.3</b>        | <b>3.4</b> |
| Austria *                      | -               | -                  | -                | -          | -          | -                 | -               | -          | -                 | -                              | -                       | -                 | -          |
| Belarus (Childhood) †          | 2000-2014       | 626                | 0.0              | 0.0        | 0.0        | 626               | 0.8             | 6.5        | 580               | 93.8                           | 7.2                     | 1.7               | 0.0        |
| Belgium *                      | 2004-2014       | 782                | 0.0              | 0.0        | 0.0        | 782               | 0.1             | 0.0        | 781               | 97.3                           | 3.1                     | 2.8               | 0.0        |
| Bulgaria *                     | -               | -                  | -                | -          | -          | -                 | -               | -          | -                 | -                              | -                       | -                 | -          |
| Croatia *                      | 2000-2014       | 414                | 0.0              | 0.0        | 0.2        | 413               | 1.0             | 1.5        | 403               | 74.9                           | 7.4                     | 0.0               | 0.0        |
| Czech Republic *               | 2000-2014       | 555                | 0.0              | 0.0        | 0.0        | 555               | 2.9             | 9.0        | 489               | 84.0                           | 3.3                     | 0.0               | 0.0        |
| Denmark *                      | 2000-2014       | 494                | 0.0              | 0.0        | 0.2        | 493               | 0.0             | 0.0        | 493               | 88.4                           | 32.9                    | 0.8               | 0.0        |
| Estonia *                      | 2000-2012       | 108                | 0.0              | 0.0        | 0.0        | 108               | 0.0             | 4.6        | 103               | 87.4                           | 0.0                     | 1.9               | 0.0        |
| Finland *                      | 2000-2014       | 519                | 0.8              | 0.0        | 0.2        | 514               | 0.6             | 1.6        | 503               | 98.0                           | 0.8                     | 0.8               | 0.0        |
| French registries              | 2000-2012       | 4,483              | 0.0              | 0.0        | 0.1        | 4,477             | 0.0             | 0.0        | 4,477             | 98.8                           | 1.6                     | 0.0               | 2.7        |
| Bas-Rhin                       | -               | -                  | -                | -          | -          | -                 | -               | -          | -                 | -                              | -                       | -                 | -          |
| Basse Normandie                | -               | -                  | -                | -          | -          | -                 | -               | -          | -                 | -                              | -                       | -                 | -          |
| Burgundy Digestive             | -               | -                  | -                | -          | -          | -                 | -               | -          | -                 | -                              | -                       | -                 | -          |
| Calvados                       | -               | -                  | -                | -          | -          | -                 | -               | -          | -                 | -                              | -                       | -                 | -          |
| Calvados Digestive             | -               | -                  | -                | -          | -          | -                 | -               | -          | -                 | -                              | -                       | -                 | -          |
| Côte-d'Or Gynaecologic         | -               | -                  | -                | -          | -          | -                 | -               | -          | -                 | -                              | -                       | -                 | -          |
| Côte-d'Or Haematopoietic       | -               | -                  | -                | -          | -          | -                 | -               | -          | -                 | -                              | -                       | -                 | -          |
| Doubs                          | -               | -                  | -                | -          | -          | -                 | -               | -          | -                 | -                              | -                       | -                 | -          |
| Finistère                      | -               | -                  | -                | -          | -          | -                 | -               | -          | -                 | -                              | -                       | -                 | -          |
| Gironde CNS                    | -               | -                  | -                | -          | -          | -                 | -               | -          | -                 | -                              | -                       | -                 | -          |
| Gironde General                | -               | -                  | -                | -          | -          | -                 | -               | -          | -                 | -                              | -                       | -                 | -          |
| Gironde Haematopoietic         | -               | -                  | -                | -          | -          | -                 | -               | -          | -                 | -                              | -                       | -                 | -          |
| Haut-Rhin                      | -               | -                  | -                | -          | -          | -                 | -               | -          | -                 | -                              | -                       | -                 | -          |
| Haute-Vienne                   | -               | -                  | -                | -          | -          | -                 | -               | -          | -                 | -                              | -                       | -                 | -          |
| Hérault                        | -               | -                  | -                | -          | -          | -                 | -               | -          | -                 | -                              | -                       | -                 | -          |
| Isère                          | -               | -                  | -                | -          | -          | -                 | -               | -          | -                 | -                              | -                       | -                 | -          |
| Lille Metro                    | -               | -                  | -                | -          | -          | -                 | -               | -          | -                 | -                              | -                       | -                 | -          |
| Loire-Atlantique               | -               | -                  | -                | -          | -          | -                 | -               | -          | -                 | -                              | -                       | -                 | -          |
| Manche                         | -               | -                  | -                | -          | -          | -                 | -               | -          | -                 | -                              | -                       | -                 | -          |
| Somme                          | -               | -                  | -                | -          | -          | -                 | -               | -          | -                 | -                              | -                       | -                 | -          |
| Tarn                           | -               | -                  | -                | -          | -          | -                 | -               | -          | -                 | -                              | -                       | -                 | -          |
| France Childhood Haem †        | -               | -                  | -                | -          | -          | -                 | -               | -          | -                 | -                              | -                       | -                 | -          |
| France Childhood Solid †       | 2000-2012       | 4,483              | 0.0              | 0.0        | 0.1        | 4,477             | 0.0             | 0.0        | 4,477             | 98.8                           | 1.6                     | 0.0               | 2.7        |
| German registries              | 2000-2013       | 757                | 0.0              | 0.0        | 3.0        | 734               | 2.9             | 3.0        | 691               | 94.5                           | 1.2                     | 0.0               | 20.1       |
| Brandenburg                    | -               | -                  | -                | -          | -          | -                 | -               | -          | -                 | -                              | -                       | -                 | -          |
| Bremen                         | 2000-2013       | 36                 | 0.0              | 0.0        | 0.0        | 36                | 2.8             | 0.0        | 35                | 100.0                          | 2.9                     | 0.0               | 0.0        |
| Hamburg                        | -               | -                  | -                | -          | -          | -                 | -               | -          | -                 | -                              | -                       | -                 | -          |
| Lower Saxony                   | 2003-2013       | 289                | 0.0              | 0.0        | 8.0        | 266               | 3.8             | 3.8        | 246               | 99.6                           | 0.4                     | 0.0               | 26.4       |
| Mecklenburg-W. Pomerania       | -               | -                  | -                | -          | -          | -                 | -               | -          | -                 | -                              | -                       | -                 | -          |
| Rhineland Palatinate           | 2000-2013       | 303                | 0.0              | 0.0        | 0.0        | 303               | 1.7             | 0.7        | 296               | 87.5                           | 1.4                     | 0.0               | 25.0       |
| Saarland                       | 2001-2012       | 36                 | 0.0              | 0.0        | 0.0        | 36                | 0.0             | 13.9       | 31                | 100.0                          | 0.0                     | 0.0               | 0.0        |
| Saxony                         | -               | -                  | -                | -          | -          | -                 | -               | -          | -                 | -                              | -                       | -                 | -          |
| Schleswig-Holstein             | 2000-2012       | 93                 | 0.0              | 0.0        | 0.0        | 93                | 5.4             | 5.4        | 83                | 100.0                          | 2.4                     | 0.0               | 0.0        |
| Thuringia                      | -               | -                  | -                | -          | -          | -                 | -               | -          | -                 | -                              | -                       | -                 | -          |
| Gibraltar *                    | -               | -                  | -                | -          | -          | -                 | -               | -          | -                 | -                              | -                       | -                 | -          |
| Greece (National Paediatric) † | 2010-2014       | 246                | 0.8              | 0.0        | 0.0        | 244               | 0.0             | 2.9        | 237               | 99.2                           | 0.8                     | 4.6               | 0.0        |
| Iceland *                      | 2000-2014       | 35                 | 0.0              | 0.0        | 0.0        | 35                | 0.0             | 0.0        | 35                | 88.6                           | 11.4                    | 0.0               | 0.0        |
| Ireland *                      | 2000-2013       | 417                | 0.0              | 0.0        | 0.2        | 416               | 0.2             | 4.6        | 396               | 83.8                           | 0.5                     | 0.0               | 0.0        |
| Italian registries             | 2000-2013       | 1,642              | 0.0              | 0.2        | 0.0        | 1,638             | 0.1             | 1.4        | 1,613             | 83.3                           | 17.9                    | 1.2               | 1.7        |
| Alto Adige                     | 2000-2010       | 13                 | 0.0              | 0.0        | 0.0        | 13                | 0.0             | 0.0        | 13                | 100.0                          | 0.0                     | 0.0               | 0.0        |
| Barletta-Andria-Trani          | 2006-2012       | 15                 | 0.0              | 0.0        | 0.0        | 15                | 0.0             | 0.0        | 15                | 100.0                          | 0.0                     | 0.0               | 0.0        |
| Basilicata                     | 2006-2010       | 11                 | 0.0              | 0.0        | 0.0        | 11                | 0.0             | 0.0        | 11                | 72.7                           | 27.3                    | 0.0               | 0.0        |
| Bergamo                        | 2007-2012       | 32                 | 0.0              | 0.0        | 0.0        | 32                | 0.0             | 0.0        | 32                | 78.1                           | 21.9                    | 0.0               | 0.0        |
| Biella-Vercelli                | 2000-2010       | -                  | -                | -          | -          | -                 | -               | -          | -                 | -                              | -                       | -                 | -          |
| Brescia                        | 2000-2008       | 34                 | 0.0              | 0.0        | 0.0        | 34                | 0.0             | 11.8       | 30                | 43.3                           | 56.7                    | 3.3               | 0.0        |
| Brindisi                       | 2006-2008       | 9                  | 0.0              | 0.0        | 0.0        | 9                 | 0.0             | 0.0        | 9                 | 77.8                           | 22.2                    | 0.0               | 0.0        |
| Caserta                        | 2008-2010       | 31                 | 0.0              | 0.0        | 0.0        | 31                | 0.0             | 6.5        | 29                | 82.8                           | 24.1                    | 0.0               | 13.8       |
| Catania-Messina-Enna           | 2003-2012       | 56                 | 0.0              | 0.0        | 0.0        | 56                | 0.0             | 0.0        | 56                | 94.6                           | 7.1                     | 0.0               | 10.7       |
| Catanzaro                      | 2003-2009       | 8                  | 0.0              | 0.0        | 0.0        | 8                 | 0.0             | 0.0        | 8                 | 100.0                          | 0.0                     | 0.0               | 0.0        |
| Como                           | 2003-2011       | 31                 | 0.0              | 0.0        | 0.0        | 31                | 3.2             | 0.0        | 30                | 83.3                           | 16.7                    | 0.0               | 0.0        |
| Cremona                        | 2005-2010       | 10                 | 0.0              | 0.0        | 0.0        | 10                | 0.0             | 0.0        | 10                | 80.0                           | 20.0                    | 0.0               | 0.0        |
| Ferrara                        | 2000-2011       | 19                 | 0.0              | 0.0        | 0.0        | 19                | 0.0             | 0.0        | 19                | 94.7                           | 5.3                     | 0.0               | 0.0        |
| Friuli-Venezia-Giulia          | 2000-2010       | 49                 | 0.0              | 0.0        | 0.0        | 49                | 2.0             | 2.0        | 47                | 91.5                           | 8.5                     | 4.3               | 0.0        |
| Genoa                          | 2000-2009       | 43                 | 0.0              | 0.0        | 0.0        | 43                | 0.0             | 0.0        | 43                | 67.4                           | 32.6                    | 0.0               | 0.0        |
| Latina                         | 2000-2011       | 33                 | 0.0              | 0.0        | 0.0        | 33                | 0.0             | 9.1        | 30                | 66.7                           | 36.7                    | 3.3               | 6.7        |
| Lecce                          | 2003-2008       | 31                 | 0.0              | 0.0        | 0.0        | 31                | 0.0             | 6.5        | 29                | 72.4                           | 31.0                    | 0.0               | 0.0        |

Web-table 2.16: Data quality indicators, children diagnosed during 2000-2014, by continent, country and registry: BRAIN (CHILDREN)

|                      | Calendar period | Patients submitted | Ineligible (%) ¶ |         |       | Eligible patients | Excluded (%) ¶¶ |       | Patients included | Data quality indicators (%) ¶¶ |                         |                   |          |
|----------------------|-----------------|--------------------|------------------|---------|-------|-------------------|-----------------|-------|-------------------|--------------------------------|-------------------------|-------------------|----------|
|                      |                 |                    | Incomplete dates | In situ | Other |                   | DCO             | Other |                   | MV                             | Non-specific morphology | Lost to follow-up | Censored |
| Mantova              | 2001-2010       | 12                 | 0.0              | 0.0     | 0.0   | 12                | 0.0             | 16.7  | 10                | 100.0                          | 0.0                     | 0.0               | 0.0      |
| Milano               | 2000-2012       | 94                 | 0.0              | 0.0     | 0.0   | 94                | 0.0             | 1.1   | 93                | 87.1                           | 12.9                    | 3.2               | 0.0      |
| Modena               | 2000-2012       | 33                 | 0.0              | 0.0     | 0.0   | 33                | 0.0             | 0.0   | 33                | 90.9                           | 12.1                    | 0.0               | 3.0      |
| Monza-Brianza        | 2007-2012       | 24                 | 0.0              | 0.0     | 0.0   | 24                | 0.0             | 0.0   | 24                | 83.3                           | 25.0                    | 0.0               | 0.0      |
| Naples               | 2000-2012       | 103                | 0.0              | 0.0     | 0.0   | 103               | 0.0             | 1.9   | 101               | 91.1                           | 9.9                     | 4.0               | 2.0      |
| Nuoro                | 2003-2011       | 8                  | 0.0              | 0.0     | 0.0   | 8                 | 0.0             | 0.0   | 8                 | 87.5                           | 12.5                    | 0.0               | 0.0      |
| Palermo              | 2003-2012       | 78                 | 0.0              | 0.0     | 0.0   | 78                | 0.0             | 0.0   | 78                | 59.0                           | 41.0                    | 0.0               | 0.0      |
| Parma                | 2000-2013       | 36                 | 0.0              | 0.0     | 0.0   | 36                | 0.0             | 0.0   | 36                | 88.9                           | 13.9                    | 2.8               | 0.0      |
| Pavia                | 2003-2008       | 5                  | 0.0              | 0.0     | 0.0   | 5                 | 0.0             | 0.0   | 5                 | 80.0                           | 20.0                    | 0.0               | 0.0      |
| Piacenza             | 2007-2011       | 7                  | 0.0              | 0.0     | 0.0   | 7                 | 0.0             | 0.0   | 7                 | 57.1                           | 42.9                    | 0.0               | 28.6     |
| Ragusa               | 2000-2012       | 47                 | 0.0              | 0.0     | 0.0   | 47                | 0.0             | 0.0   | 47                | 76.6                           | 23.4                    | 2.1               | 0.0      |
| Reggio Emilia        | 2000-2012       | 33                 | 0.0              | 0.0     | 0.0   | 33                | 0.0             | 0.0   | 33                | 93.9                           | 6.1                     | 9.1               | 0.0      |
| Romagna              | 2000-2012       | 77                 | 0.0              | 0.0     | 0.0   | 77                | 0.0             | 0.0   | 77                | 70.1                           | 29.9                    | 0.0               | 0.0      |
| Salerno              | 2000-2009       | 50                 | 0.0              | 0.0     | 0.0   | 50                | 0.0             | 2.0   | 49                | 55.1                           | 44.9                    | 0.0               | 12.2     |
| Sassari              | 2000-2011       | 22                 | 0.0              | 0.0     | 0.0   | 22                | 0.0             | 0.0   | 22                | 72.7                           | 50.0                    | 0.0               | 0.0      |
| Siracusa             | 2000-2012       | 15                 | 0.0              | 0.0     | 0.0   | 15                | 0.0             | 0.0   | 15                | 93.3                           | 20.0                    | 0.0               | 6.7      |
| Sondrio              | 2002-2011       | 9                  | 0.0              | 0.0     | 0.0   | 9                 | 0.0             | 0.0   | 9                 | 77.8                           | 22.2                    | 0.0               | 0.0      |
| Taranto              | 2006-2012       | 29                 | 0.0              | 0.0     | 0.0   | 29                | 0.0             | 6.9   | 27                | 92.6                           | 7.4                     | 7.4               | 0.0      |
| Trapani              | 2002-2010       | 17                 | 0.0              | 0.0     | 0.0   | 17                | 0.0             | 0.0   | 17                | 88.2                           | 11.8                    | 0.0               | 0.0      |
| Trento               | 2000-2010       | 28                 | 0.0              | 0.0     | 0.0   | 28                | 0.0             | 0.0   | 28                | 67.9                           | 32.1                    | 3.6               | 0.0      |
| Turin                | 2000-2012       |                    |                  |         |       |                   |                 |       |                   |                                |                         |                   |          |
| Tuscany              | 2000-2009       | 69                 | 0.0              | 0.0     | 0.0   | 69                | 0.0             | 1.4   | 68                | 83.8                           | 19.1                    | 0.0               | 2.9      |
| Umbria               | 2000-2013       | 38                 | 0.0              | 0.0     | 0.0   | 38                | 0.0             | 5.3   | 36                | 86.1                           | 13.9                    | 0.0               | 0.0      |
| Varese               | 2000-2012       | 50                 | 0.0              | 0.0     | 0.0   | 50                | 0.0             | 0.0   | 50                | 94.0                           | 6.0                     | 0.0               | 0.0      |
| Veneto               | 2000-2009       | 57                 | 0.0              | 0.0     | 0.0   | 57                | 0.0             | 0.0   | 57                | 94.7                           | 5.3                     | 0.0               | 1.8      |
| Viterbo              | 2006-2010       | 9                  | 0.0              | 0.0     | 0.0   | 9                 | 0.0             | 0.0   | 9                 | 100.0                          | 11.1                    | 0.0               | 11.1     |
| Piedmont Childhood   | 2000-2011       | 267                | 0.0              | 1.5     | 0.0   | 263               | 0.0             | 0.0   | 263               | 93.5                           | 6.5                     | 0.0               | 0.0      |
| Latvia *             | 2000-2014       | 157                | 0.0              | 0.0     | 33.8  | 104               | 0.0             | 3.8   | 100               | 100.0                          | 0.0                     | 0.0               | 0.0      |
| Lithuania *          | 2000-2012       | 143                | 0.0              | 0.0     | 0.7   | 142               | 3.5             | 0.7   | 136               | 80.1                           | 0.0                     | 0.0               | 0.0      |
| Malta *              | 2000-2013       | 28                 | 0.0              | 0.0     | 0.0   | 28                | 7.1             | 7.1   | 24                | 100.0                          | 0.0                     | 0.0               | 0.0      |
| Netherlands *        | 2000-2014       | 1,447              | 0.0              | 0.0     | 0.1   | 1,445             | 0.3             | 0.9   | 1,428             | 96.5                           | 3.6                     | 1.2               | 0.0      |
| Norway *             | 2000-2014       | 560                | 0.0              | 0.0     | 8.0   | 515               | 0.2             | 5.8   | 484               | 97.5                           | 7.0                     | 0.4               | 0.0      |
| Poland *             | 2000-2014       | 2,128              | 0.0              | 0.0     | 0.0   | 2,128             | 0.9             | 1.8   | 2,071             | 89.1                           | 0.2                     | 0.0               | 0.0      |
| Greater Poland       | 2000-2014       | 252                | 0.0              | 0.0     | 0.0   | 252               | 0.4             | 1.2   | 248               | 94.8                           | 0.4                     | 0.0               | 0.0      |
| Holy Cross           | 2000-2013       | 66                 | 0.0              | 0.0     | 0.0   | 66                | 0.0             | 0.0   | 66                | 83.3                           | 0.0                     | 0.0               | 0.0      |
| Kuiavia-Pomerania    | 2000-2014       | 125                | 0.0              | 0.0     | 0.0   | 125               | 0.0             | 1.6   | 123               | 93.5                           | 0.8                     | 0.0               | 0.0      |
| Lesser Poland        | 2000-2014       | 216                | 0.0              | 0.0     | 0.0   | 216               | 1.4             | 0.9   | 211               | 95.3                           | 0.0                     | 0.0               | 0.0      |
| Łódź                 | 2000-2014       | 141                | 0.0              | 0.0     | 0.0   | 141               | 0.0             | 6.4   | 132               | 83.3                           | 0.0                     | 0.0               | 0.0      |
| Lower Silesia        | 2000-2014       | 121                | 0.0              | 0.0     | 0.0   | 121               | 0.0             | 5.0   | 115               | 79.1                           | 0.0                     | 0.9               | 0.0      |
| Lublin               | 2000-2014       | 146                | 0.0              | 0.0     | 0.0   | 146               | 2.1             | 0.7   | 142               | 83.1                           | 0.0                     | 0.0               | 0.0      |
| Lubush               | 2000-2014       | 66                 | 0.0              | 0.0     | 0.0   | 66                | 0.0             | 1.5   | 65                | 98.5                           | 0.0                     | 0.0               | 0.0      |
| Mazovia              | 2000-2014       | 232                | 0.0              | 0.0     | 0.0   | 232               | 0.0             | 2.2   | 227               | 82.4                           | 0.0                     | 0.0               | 0.0      |
| Opole                | 2000-2014       | 52                 | 0.0              | 0.0     | 0.0   | 52                | 0.0             | 0.0   | 52                | 98.1                           | 0.0                     | 0.0               | 0.0      |
| Podlaha              | 2000-2014       | 58                 | 0.0              | 0.0     | 0.0   | 58                | 1.7             | 0.0   | 57                | 78.9                           | 0.0                     | 0.0               | 0.0      |
| Pomerania            | 2000-2014       | 100                | 0.0              | 0.0     | 0.0   | 100               | 6.0             | 0.0   | 94                | 96.8                           | 0.0                     | 0.0               | 0.0      |
| Silesia              | 2000-2014       | 217                | 0.0              | 0.0     | 0.0   | 217               | 0.0             | 0.5   | 216               | 91.7                           | 0.5                     | 0.0               | 0.0      |
| Subcarpathia         | 2000-2014       | 141                | 0.0              | 0.0     | 0.0   | 141               | 1.4             | 2.1   | 136               | 94.1                           | 0.0                     | 0.0               | 0.0      |
| Varmia-Mazuria       | 2000-2014       | 89                 | 0.0              | 0.0     | 0.0   | 89                | 0.0             | 2.2   | 87                | 94.3                           | 1.1                     | 0.0               | 0.0      |
| West Pomerania       | 2000-2014       | 106                | 0.0              | 0.0     | 0.0   | 106               | 2.8             | 2.8   | 100               | 74.0                           | 0.0                     | 0.0               | 0.0      |
| Portugal *           | 2000-2014       | 563                | 0.2              | 0.0     | 0.7   | 558               | 0.0             | 1.6   | 549               | 93.1                           | 2.4                     | 1.6               | 0.0      |
| Azores               | 2000-2013       | 21                 | 0.0              | 0.0     | 0.0   | 21                | 0.0             | 4.8   | 20                | 95.0                           | 5.0                     | 0.0               | 0.0      |
| Portugal Central     | 2007-2010       | 26                 | 0.0              | 0.0     | 0.0   | 26                | 0.0             | 0.0   | 26                | 96.2                           | 3.8                     | 0.0               | 0.0      |
| Portugal North       | 2000-2010       | 124                | 0.8              | 0.0     | 1.6   | 121               | 0.0             | 1.7   | 119               | 95.0                           | 7.6                     | 0.0               | 0.0      |
| Portugal South       | 2000-2014       | 392                | 0.0              | 0.0     | 0.5   | 390               | 0.0             | 1.5   | 384               | 92.2                           | 0.5                     | 2.3               | 0.0      |
| Romania (Cluj)       | 2006-2012       | 21                 | 0.0              | 0.0     | 0.0   | 21                | 0.0             | 9.5   | 19                | 89.5                           | 10.5                    | 0.0               | 0.0      |
| Russian registries ‡ | 2000-2014       | 443                | 0.0              | 0.0     | 12.0  | 390               | 0.5             | 15.6  | 327               | 91.7                           | 4.0                     | 3.4               | 4.9      |
| Arkhangelsk          | 2000-2014       | 73                 | 0.0              | 0.0     | 0.0   | 73                | 0.0             | 2.7   | 71                | 77.5                           | 4.2                     | 1.4               | 0.0      |
| Karelia              | 2000-2014       | 37                 | 0.0              | 0.0     | 0.0   | 37                | 2.7             | 8.1   | 33                | 72.7                           | 3.0                     | 0.0               | 6.1      |
| Omsk                 | 2003-2013       | 86                 | 0.0              | 0.0     | 19.8  | 69                | 0.0             | 10.1  | 62                | 100.0                          | 4.8                     | 11.3              | 12.9     |
| Samara               | 2000-2014       | 232                | 0.0              | 0.0     | 15.5  | 196               | 0.5             | 24.5  | 147               | 98.6                           | 4.1                     | 1.4               | 0.0      |
| Tomsk                | 2005-2014       | 15                 | 0.0              | 0.0     | 0.0   | 15                | 0.0             | 6.7   | 14                | 100.0                          | 0.0                     | 7.1               | 42.9     |
| Slovakia *           | 2000-2010       | 330                | 0.0              | 0.0     | 0.0   | 330               | 2.1             | 0.0   | 323               | 92.0                           | 8.0                     | 0.0               | 0.0      |
| Slovenia *           | 2000-2013       | 116                | 0.0              | 0.0     | 1.7   | 114               | 0.0             | 0.0   | 114               | 93.0                           | 0.0                     | 0.0               | 0.0      |
| Spanish registries   | 2000-2014       | 1,536              | 0.1              | 0.0     | 0.1   | 1,534             | 0.2             | 0.7   | 1,521             | 88.4                           | 2.2                     | 0.1               | 32.7     |
| Basque Country       | 2000-2013       | 115                | 0.0              | 0.0     | 0.0   | 115               | 0.0             | 1.7   | 113               | 85.8                           | 1.8                     | 0.0               | 0.0      |
| Canaries             | 2000-2011       | 79                 | 0.0              | 0.0     | 0.0   | 79                | 0.0             | 3.8   | 76                | 92.1                           | 0.0                     | 0.0               | 0.0      |
| Girona               | 2000-2013       | 56                 | 1.8              | 0.0     | 0.0   | 55                | 0.0             | 1.8   | 54                | 100.0                          | 0.0                     | 1.9               | 0.0      |
| Granada              | 2000-2012       | 60                 | 0.0              | 0.0     | 1.7   | 59                | 0.0             | 0.0   | 59                | 79.7                           | 0.0                     | 0.0               | 0.0      |
| Mallorca             | 2001-2012       | 45                 | 0.0              | 0.0     | 0.0   | 45                | 0.0             | 0.0   | 45                | 91.1                           | 0.0                     | 2.2               | 0.0      |
| Murcia               | 2000-2010       | 66                 | 0.0              | 0.0     | 0.0   | 66                | 1.5             | 1.5   | 64                | 100.0                          | 0.0                     | 0.0               | 0.0      |
| Navarra              | 2000-2010       | 33                 | 0.0              | 0.0     | 0.0   | 33                | 3.0             | 0.0   | 32                | 87.5                           | 3.1                     | 0.0               | 0.0      |
| Tarragona            | 2000-2011       | 37                 | 0.0              | 0.0     | 0.0   | 37                | 0.0             | 0.0   | 37                | 100.0                          | 2.7                     | 0.0               | 0.0      |
| Spain Childhood      | 2000-2014       | 781                | 0.0              | 0.0     | 0.0   | 781               | 0.1             | 0.3   | 778               | 85.2                           | 0.9                     | 0.0               | 63.9     |
| Valencia Childhood   | 2000-2012       | 264                | 0.0              | 0.0     | 0.0   | 264               | 0.0             | 0.4   | 263               | 92.8                           | 8.4                     | 0.0               | 0.0      |
| Sweden *             | 2000-2014       | 813                | 0.0              | 0.0     | 0.2   | 811               | 0.5             | 5.7   | 761               | 92.9                           | 8.4                     | 0.5               | 0.1      |
| Swiss registries     | 2000-2014       | 577                | 0.0              | 0.0     | 0.3   | 575               | 0.0             | 1.7   | 565               | 85.7                           | 0.4                     | 0.7               | 1.9      |
| Basel                | 2001-2010       |                    |                  |         |       |                   |                 |       |                   |                                |                         |                   |          |
| Fribourg             | -               |                    |                  |         |       |                   |                 |       |                   |                                |                         |                   |          |
| Geneva               | 2000-2013       |                    |                  |         |       |                   |                 |       |                   |                                |                         |                   |          |
| Graubünden-Glarus    | 2002-2014       |                    |                  |         |       |                   |                 |       |                   |                                |                         |                   |          |
| Neuchâtel            | 2001-2014       |                    |                  |         |       |                   |                 |       |                   |                                |                         |                   |          |
| St Gallen-Appenzell  | 2000-2014       |                    |                  |         |       |                   |                 |       |                   |                                |                         |                   |          |
| Ticino               | 2000-2014       |                    |                  |         |       |                   |                 |       |                   |                                |                         |                   |          |
| Valais               | 2000-2014       |                    |                  |         |       |                   |                 |       |                   |                                |                         |                   |          |

Web-table 2.16: Data quality indicators, children diagnosed during 2000-2014, by continent, country and registry: BRAIN (CHILDREN)

|                              | Calendar period | Patients submitted | Ineligible (%) ¶ |            |            | Eligible patients | Excluded (%) ¶¶ |            | Patients included | Data quality indicators (%) †† |                         |                   |            |
|------------------------------|-----------------|--------------------|------------------|------------|------------|-------------------|-----------------|------------|-------------------|--------------------------------|-------------------------|-------------------|------------|
|                              |                 |                    | Incomplete dates | In situ    | Other      |                   | DCO             | Other      |                   | MV                             | Non-specific morphology | Lost to follow-up | Censored   |
| Zürich                       | 2000-2013       |                    |                  |            |            |                   |                 |            |                   |                                |                         |                   |            |
| Switzerland (Childhood) †    | 2000-2014       | 577                | 0.0              | 0.0        | 0.3        | 575               | 0.0             | 1.7        | 565               | 85.7                           | 0.4                     | 0.7               | 1.9        |
| United Kingdom *             | 2000-2014       | 5,170              | 0.0              | 0.0        | 0.0        | 5,168             | 0.2             | 1.2        | 5,093             | 95.0                           | 4.9                     | 3.8               | 0.0        |
| England                      | 2000-2014       | 4,306              | 0.0              | 0.0        | 0.0        | 4,304             | 0.2             | 1.3        | 4,241             | 97.1                           | 4.0                     | 4.5               | 0.0        |
| Northern Ireland             | 2000-2014       | 194                | 0.0              | 0.0        | 0.0        | 194               | 0.0             | 0.5        | 193               | 80.8                           | 21.2                    | 0.0               | 0.0        |
| Scotland                     | 2000-2014       | 399                | 0.0              | 0.0        | 0.0        | 399               | 0.0             | 0.0        | 399               | 82.0                           | 1.3                     | 0.3               | 0.0        |
| Wales                        | 2000-2014       | 271                | 0.0              | 0.0        | 0.0        | 271               | 0.7             | 3.3        | 260               | 91.2                           | 12.3                    | 0.0               | 0.0        |
| <b>OCEANIA</b>               |                 | <b>1,839</b>       | <b>0.4</b>       | <b>0.0</b> | <b>0.4</b> | <b>1,825</b>      | <b>0.4</b>      | <b>5.7</b> | <b>1,713</b>      | <b>92.8</b>                    | <b>7.4</b>              | <b>0.0</b>        | <b>0.0</b> |
| Australia *                  | 2000-2014       | 1,567              | 0.4              | 0.0        | 0.4        | 1,553             | 0.5             | 3.9        | 1,484             | 92.8                           | 7.3                     | 0.0               | 0.0        |
| Australian Capital Territory | 2000-2013       | 31                 | 0.0              | 0.0        | 0.0        | 31                | 0.0             | 3.2        | 30                | 100.0                          | 0.0                     | 0.0               | 0.0        |
| New South Wales              | 2000-2012       | 330                | 0.3              | 0.0        | 0.3        | 328               | 0.0             | 2.7        | 319               | 100.0                          | 0.0                     | 0.0               | 0.0        |
| Northern Territory           | 2000-2013       | 16                 | 0.0              | 0.0        | 6.3        | 15                | 0.0             | 13.3       | 13                | 76.9                           | 0.0                     | 0.0               | 0.0        |
| Queensland                   | 2000-2014       | 560                | 1.1              | 0.0        | 0.9        | 549               | 1.5             | 4.2        | 518               | 96.9                           | 4.4                     | 0.0               | 0.0        |
| South Australia              | 2000-2013       | 85                 | 0.0              | 0.0        | 0.0        | 85                | 0.0             | 20.0       | 68                | 91.2                           | 1.5                     | 0.0               | 0.0        |
| Tasmania                     | 2000-2013       | 47                 | 0.0              | 0.0        | 0.0        | 47                | 0.0             | 0.0        | 47                | 97.9                           | 2.1                     | 0.0               | 0.0        |
| Victoria                     | 2000-2014       | 362                | 0.0              | 0.0        | 0.0        | 362               | 0.0             | 1.1        | 358               | 77.7                           | 22.9                    | 0.0               | 0.0        |
| Western Australia            | 2000-2014       | 136                | 0.0              | 0.0        | 0.0        | 136               | 0.0             | 3.7        | 131               | 99.2                           | 1.5                     | 0.0               | 0.0        |
| New Zealand *                | 2000-2014       | 272                | 0.0              | 0.0        | 0.0        | 272               | 0.0             | 15.8       | 229               | 93.0                           | 7.9                     | 0.0               | 0.0        |
| <b>Total</b>                 |                 | <b>70,501</b>      | <b>0.6</b>       | <b>0.0</b> | <b>0.8</b> | <b>69,508</b>     | <b>1.0</b>      | <b>2.8</b> | <b>66,814</b>     | <b>94.0</b>                    | <b>5.5</b>              | <b>2.0</b>        | <b>2.4</b> |

Web-table 2.17: Data quality indicators, children diagnosed during 2000-2014, by continent, country and registry: ACUTE LYMPHOBLASTIC LEUKAEMIA (CHILDREN)

|                                    | Calendar period | Patients submitted | Ineligible (%) ¶ |            |            | Eligible patients | Excluded (%) |            | Patients included | Data quality indicators (%) †† |                         |                   |             |
|------------------------------------|-----------------|--------------------|------------------|------------|------------|-------------------|--------------|------------|-------------------|--------------------------------|-------------------------|-------------------|-------------|
|                                    |                 |                    | Incomplete dates | In situ    | Other      |                   | DCO          | Other      |                   | MV                             | Non-specific morphology | Lost to follow-up | Censored    |
| <b>AFRICA</b>                      |                 | <b>67</b>          | <b>3.0</b>       | <b>0.0</b> | <b>1.5</b> | <b>64</b>         | <b>0.0</b>   | <b>0.0</b> | <b>64</b>         | <b>100.0</b>                   | <b>0.0</b>              | <b>3.1</b>        | <b>54.7</b> |
| Algerian registries                | 2000-2014       | 47                 | 2.1              | 0.0        | 2.1        | 45                | 0.0          | 0.0        | 45                | 100.0                          | 0.0                     | 0.0               | 53.3        |
| Annaba                             | 2000-2014       | 43                 | 2.3              | 0.0        | 2.3        | 41                | 0.0          | 0.0        | 41                | 100.0                          | 0.0                     | 0.0               | 56.1        |
| Sétif                              | 2001-2001       | 4                  | 0.0              | 0.0        | 0.0        | 4                 | 0.0          | 0.0        | 4                 | 100.0                          | 0.0                     | 0.0               | 25.0        |
| Tlemcen                            | -               | -                  | -                | -          | -          | -                 | -            | -          | -                 | -                              | -                       | -                 | -           |
| Mali (Bamako)                      | -               | -                  | -                | -          | -          | -                 | -            | -          | -                 | -                              | -                       | -                 | -           |
| Mauritius *                        | -               | -                  | -                | -          | -          | -                 | -            | -          | -                 | -                              | -                       | -                 | -           |
| Morocco (Casablanca)               | -               | -                  | -                | -          | -          | -                 | -            | -          | -                 | -                              | -                       | -                 | -           |
| Nigeria (Ibadan)                   | 2008-2013       | 13                 | 7.7              | 0.0        | 0.0        | 12                | 0.0          | 0.0        | 12                | 100.0                          | 0.0                     | 0.0               | 66.7        |
| South Africa (Eastern Cape)        | 2000-2013       | 7                  | 0.0              | 0.0        | 0.0        | 7                 | 0.0          | 0.0        | 7                 | 100.0                          | 0.0                     | 28.6              | 42.9        |
| <b>AMERICA (Central and South)</b> |                 | <b>14,626</b>      | <b>3.5</b>       | <b>0.0</b> | <b>4.1</b> | <b>13,526</b>     | <b>1.5</b>   | <b>0.1</b> | <b>13,299</b>     | <b>100.0</b>                   | <b>0.0</b>              | <b>3.4</b>        | <b>11.8</b> |
| Argentinian registries             | 2000-2013       | 5,275              | 0.0              | 0.0        | 0.0        | 5,273             | 2.9          | 0.0        | 5,119             | 100.0                          | 0.0                     | 0.0               | 19.5        |
| Chubut                             | -               | -                  | -                | -          | -          | -                 | -            | -          | -                 | -                              | -                       | -                 | -           |
| Córdoba                            | -               | -                  | -                | -          | -          | -                 | -            | -          | -                 | -                              | -                       | -                 | -           |
| Mendoza                            | 2003-2013       | -                  | -                | -          | -          | -                 | -            | -          | -                 | -                              | -                       | -                 | -           |
| Tierra del Fuego                   | -               | -                  | -                | -          | -          | -                 | -            | -          | -                 | -                              | -                       | -                 | -           |
| Argentina (Childhood) †            | 2000-2013       | 5,275              | 0.0              | 0.0        | 0.0        | 5,273             | 2.9          | 0.0        | 5,119             | 100.0                          | 0.0                     | 0.0               | 19.5        |
| Brazilian registries               | 2000-2013       | 243                | 0.4              | 0.0        | 0.0        | 242               | 3.7          | 0.0        | 233               | 100.0                          | 0.0                     | 0.0               | 0.4         |
| Aracaju                            | 2001-2012       | 41                 | 0.0              | 0.0        | 0.0        | 41                | 2.4          | 0.0        | 40                | 100.0                          | 0.0                     | 0.0               | 0.0         |
| Cuiabá                             | -               | -                  | -                | -          | -          | -                 | -            | -          | -                 | -                              | -                       | -                 | -           |
| Curitiba                           | 2000-2012       | 189                | 0.0              | 0.0        | 0.0        | 189               | 4.2          | 0.0        | 181               | 100.0                          | 0.0                     | 0.0               | 0.0         |
| Goiânia                            | -               | -                  | -                | -          | -          | -                 | -            | -          | -                 | -                              | -                       | -                 | -           |
| Jaú                                | 2000-2013       | 13                 | 7.7              | 0.0        | 0.0        | 12                | 0.0          | 0.0        | 12                | 100.0                          | 0.0                     | 0.0               | 8.3         |
| São Paulo                          | -               | -                  | -                | -          | -          | -                 | -            | -          | -                 | -                              | -                       | -                 | -           |
| Chilean registries                 | 2000-2012       | 173                | 0.0              | 0.0        | 0.0        | 173               | 0.6          | 0.6        | 171               | 100.0                          | 0.0                     | 0.0               | 12.3        |
| Antofagasta                        | 2003-2010       | 33                 | 0.0              | 0.0        | 0.0        | 33                | 3.0          | 0.0        | 32                | 100.0                          | 0.0                     | 0.0               | 15.6        |
| Biobio                             | 2003-2012       | 45                 | 0.0              | 0.0        | 0.0        | 45                | 0.0          | 2.2        | 44                | 100.0                          | 0.0                     | 0.0               | 13.6        |
| Concepción                         | 2006-2010       | 49                 | 0.0              | 0.0        | 0.0        | 49                | 0.0          | 0.0        | 49                | 100.0                          | 0.0                     | 0.0               | 20.4        |
| Los Rios                           | 2000-2012       | 46                 | 0.0              | 0.0        | 0.0        | 46                | 0.0          | 0.0        | 46                | 100.0                          | 0.0                     | 0.0               | 0.0         |
| Colombian registries               | 2000-2012       | 319                | 3.1              | 0.0        | 0.9        | 306               | 0.0          | 0.0        | 306               | 100.0                          | 0.0                     | 0.0               | 19.0        |
| Bucaramanga                        | -               | -                  | -                | -          | -          | -                 | -            | -          | -                 | -                              | -                       | -                 | -           |
| Cali                               | 2000-2008       | 235                | 0.0              | 0.0        | 0.0        | 235               | 0.0          | 0.0        | 235               | 100.0                          | 0.0                     | 0.0               | 14.0        |
| Manizales                          | 2003-2012       | 38                 | 10.5             | 0.0        | 7.9        | 31                | 0.0          | 0.0        | 31                | 100.0                          | 0.0                     | 0.0               | 77.4        |
| Pasto                              | 2000-2012       | 46                 | 13.0             | 0.0        | 0.0        | 40                | 0.0          | 0.0        | 40                | 100.0                          | 0.0                     | 0.0               | 2.5         |
| Costa Rica *                       | 2002-2014       | 456                | 0.0              | 0.0        | 0.0        | 456               | 0.0          | 0.0        | 456               | 100.0                          | 0.0                     | 0.0               | 0.0         |
| Cuba *                             | -               | -                  | -                | -          | -          | -                 | -            | -          | -                 | -                              | -                       | -                 | -           |
| Ecuadorian registries              | 2000-2013       | 973                | 8.3              | 0.0        | 0.0        | 892               | 3.4          | 0.3        | 859               | 100.0                          | 0.0                     | 0.8               | 7.8         |
| Cuenca                             | 2000-2012       | 75                 | 24.0             | 0.0        | 0.0        | 57                | 0.0          | 0.0        | 57                | 100.0                          | 0.0                     | 0.0               | 10.5        |
| Guayaquil                          | 2005-2013       | 326                | 0.0              | 0.0        | 0.0        | 326               | 0.0          | 0.9        | 323               | 100.0                          | 0.0                     | 0.0               | 0.0         |
| Loja                               | 2000-2013       | 40                 | 0.0              | 0.0        | 0.0        | 40                | 0.0          | 0.0        | 40                | 100.0                          | 0.0                     | 17.5              | 0.0         |
| Manabí                             | 2000-2013       | 230                | 13.5             | 0.0        | 0.0        | 199               | 15.1         | 0.0        | 169               | 100.0                          | 0.0                     | 0.0               | 7.1         |
| Quito                              | 2000-2013       | 302                | 10.6             | 0.0        | 0.0        | 270               | 0.0          | 0.0        | 270               | 100.0                          | 0.0                     | 0.0               | 18.1        |
| Guadeloupe *                       | 2008-2013       | 9                  | 0.0              | 0.0        | 0.0        | 9                 | 0.0          | 0.0        | 9                 | 100.0                          | 0.0                     | 0.0               | 77.8        |
| Martinique *                       | 2000-2012       | 29                 | 0.0              | 0.0        | 0.0        | 29                | 0.0          | 0.0        | 29                | 100.0                          | 0.0                     | 0.0               | 17.2        |
| Mexico (Childhood) †               | 2008-2014       | 6,657              | 6.1              | 0.0        | 8.8        | 5,662             | 0.0          | 0.3        | 5,647             | 100.0                          | 0.0                     | 8.0               | 7.2         |
| Peru (Lima)                        | 2010-2012       | 280                | 0.0              | 0.0        | 0.0        | 280               | 4.3          | 0.0        | 268               | 100.0                          | 0.0                     | 0.0               | 1.5         |
| Puerto Rico *                      | 2000-2011       | 212                | 3.8              | 0.0        | 0.0        | 204               | 1.0          | 0.0        | 202               | 100.0                          | 0.0                     | 0.0               | 0.0         |
| Uruguay *                          | -               | -                  | -                | -          | -          | -                 | -            | -          | -                 | -                              | -                       | -                 | -           |
| <b>AMERICA (North)</b>             |                 | <b>30,077</b>      | <b>0.2</b>       | <b>0.0</b> | <b>0.0</b> | <b>30,022</b>     | <b>0.1</b>   | <b>0.0</b> | <b>29,995</b>     | <b>100.0</b>                   | <b>0.0</b>              | <b>3.0</b>        | <b>0.0</b>  |
| Canadian registries                | 2000-2014       | 2,716              | 0.1              | 0.0        | 0.0        | 2,714             | 0.1          | 0.0        | 2,712             | 100.0                          | 0.0                     | 0.0               | 0.0         |
| Alberta                            | 2000-2014       | 371                | 0.0              | 0.0        | 0.0        | 371               | 0.0          | 0.0        | 371               | 100.0                          | 0.0                     | 0.0               | 0.0         |
| British Columbia                   | 2000-2014       | 430                | 0.0              | 0.0        | 0.0        | 430               | 0.2          | 0.0        | 429               | 100.0                          | 0.0                     | 0.0               | 0.0         |
| Manitoba                           | 2000-2014       | 158                | 0.0              | 0.0        | 0.0        | 158               | 0.0          | 0.0        | 158               | 100.0                          | 0.0                     | 0.0               | 0.0         |
| New Brunswick                      | 2000-2014       | 76                 | 0.0              | 0.0        | 0.0        | 76                | 0.0          | 0.0        | 76                | 100.0                          | 0.0                     | 0.0               | 0.0         |
| Newfoundland & Labrador            | 2000-2014       | 47                 | 0.0              | 0.0        | 0.0        | 47                | 0.0          | 0.0        | 47                | 100.0                          | 0.0                     | 0.0               | 0.0         |
| Nova Scotia                        | 2000-2014       | 97                 | 2.1              | 0.0        | 0.0        | 95                | 0.0          | 0.0        | 95                | 100.0                          | 0.0                     | 0.0               | 0.0         |
| Ontario                            | 2000-2014       | 1,409              | 0.0              | 0.0        | 0.0        | 1,409             | 0.1          | 0.0        | 1,408             | 100.0                          | 0.0                     | 0.0               | 0.0         |
| Prince Edward Island               | 2001-2014       | 11                 | 0.0              | 0.0        | 0.0        | 11                | 0.0          | 0.0        | 11                | 100.0                          | 0.0                     | 0.0               | 0.0         |
| Saskatchewan                       | 2000-2014       | 117                | 0.0              | 0.0        | 0.0        | 117               | 0.0          | 0.0        | 117               | 100.0                          | 0.0                     | 0.0               | 0.0         |
| US registries                      | 2000-2014       | 27,361             | 0.2              | 0.0        | 0.0        | 27,308            | 0.1          | 0.0        | 27,283            | 100.0                          | 0.0                     | 3.3               | 0.0         |
| Alabama                            | 2000-2014       | 429                | 0.5              | 0.0        | 0.0        | 427               | 0.0          | 0.0        | 427               | 100.0                          | 0.0                     | 0.0               | 0.0         |
| Alaska                             | 2000-2013       | 75                 | 1.3              | 0.0        | 0.0        | 74                | 0.0          | 0.0        | 74                | 100.0                          | 0.0                     | 0.0               | 0.0         |
| Arkansas                           | 2000-2011       | 219                | 0.9              | 0.0        | 0.0        | 217               | 0.0          | 0.0        | 217               | 100.0                          | 0.0                     | 0.0               | 0.0         |
| California                         | 2000-2011       | 4,236              | 0.2              | 0.0        | 0.0        | 4,226             | 0.0          | 0.0        | 4,224             | 100.0                          | 0.0                     | 0.0               | 0.0         |
| Greater Bay Area                   | 2000-2014       | 852                | 0.1              | 0.0        | 0.1        | 850               | 0.0          | 0.0        | 850               | 100.0                          | 0.0                     | 11.9              | 0.0         |
| Greater California                 | 2000-2014       | 2,978              | 0.2              | 0.0        | 0.0        | 2,971             | 0.1          | 0.0        | 2,969             | 100.0                          | 0.0                     | 17.0              | 0.0         |
| Los Angeles                        | 2000-2014       | 1,473              | 0.2              | 0.0        | 0.0        | 1,470             | 0.0          | 0.0        | 1,470             | 100.0                          | 0.0                     | 31.5              | 0.0         |
| Colorado                           | 2000-2013       | 562                | 0.0              | 0.0        | 0.0        | 562               | 0.2          | 0.0        | 561               | 100.0                          | 0.0                     | 0.0               | 0.0         |
| Connecticut                        | 2000-2014       | 386                | 0.3              | 0.0        | 0.3        | 384               | 0.0          | 0.0        | 384               | 100.0                          | 0.0                     | 15.1              | 0.0         |
| Delaware                           | 2000-2014       | 86                 | 0.0              | 0.0        | 0.0        | 86                | 0.0          | 0.0        | 86                | 100.0                          | 0.0                     | 0.0               | 0.0         |
| Florida                            | 2000-2013       | 1,695              | 0.0              | 0.0        | 0.0        | 1,695             | 0.2          | 0.0        | 1,691             | 100.0                          | 0.0                     | 0.0               | 0.0         |
| Georgia                            | 2000-2014       | 961                | 0.0              | 0.0        | 0.0        | 961               | 0.1          | 0.0        | 960               | 100.0                          | 0.0                     | 0.0               | 0.0         |
| Atlanta                            | 2000-2014       | 349                | 0.0              | 0.0        | 0.0        | 349               | 0.0          | 0.0        | 349               | 100.0                          | 0.0                     | 0.0               | 0.0         |
| Hawaii                             | 2000-2014       | 152                | 0.0              | 0.0        | 0.0        | 152               | 0.0          | 0.0        | 152               | 100.0                          | 0.0                     | 22.4              | 0.0         |
| Idaho                              | 2000-2014       | 189                | 0.0              | 0.0        | 0.0        | 189               | 0.0          | 0.0        | 189               | 100.0                          | 0.0                     | 0.0               | 0.0         |
| Indiana                            | 2000-2014       | 750                | 0.0              | 0.0        | 0.0        | 750               | 0.0          | 0.0        | 750               | 100.0                          | 0.0                     | 0.0               | 0.0         |
| Iowa                               | 2000-2014       | 324                | 0.0              | 0.0        | 0.0        | 324               | 0.0          | 0.0        | 324               | 100.0                          | 0.0                     | 4.3               | 0.0         |
| Kentucky                           | 2000-2014       | 450                | 0.0              | 0.0        | 0.0        | 450               | 0.4          | 0.0        | 448               | 100.0                          | 0.0                     | 15.4              | 0.0         |
| Louisiana                          | 2000-2014       | 427                | 0.2              | 0.0        | 0.2        | 425               | 0.2          | 0.0        | 424               | 100.0                          | 0.0                     | 33.0              | 0.7         |
| Maine                              | 2000-2013       | 122                | 0.0              | 0.0        | 0.0        | 122               | 0.0          | 0.0        | 122               | 100.0                          | 0.0                     | 0.0               | 0.0         |
| Massachusetts                      | 2000-2009       | 468                | 0.0              | 0.0        | 0.0        | 468               | 0.0          | 0.0        | 468               | 100.0                          | 0.0                     | 0.0               | 0.0         |
| Michigan                           | 2000-2013       | 1,026              | 0.5              | 0.0        | 0.0        | 1,021             | 0.2          | 0.1        | 1,018             | 100.0                          | 0.0                     | 0.0               | 0.1         |

Web-table 2.17: Data quality indicators, children diagnosed during 2000-2014, by continent, country and registry: ACUTE LYMPHOBLASTIC LEUKAEMIA (CHILDREN)

|                     | Calendar period | Patients submitted | Ineligible (%) ¶ |            |            | Excluded (%)      |            |            | Data quality indicators (%) †† |              |                         |                   |            |
|---------------------|-----------------|--------------------|------------------|------------|------------|-------------------|------------|------------|--------------------------------|--------------|-------------------------|-------------------|------------|
|                     |                 |                    | Incomplete dates | In situ    | Other      | Eligible patients | DCO        | Other      | Patients included              | MV           | Non-specific morphology | Lost to follow-up | Censored   |
| Detroit             | 2000-2014       | 412                | 1.2              | 0.0        | 0.0        | 407               | 0.0        | 0.0        | 407                            | 100.0        | 0.0                     | 4.9               | 0.0        |
| Minnesota           | 2000-2013       | 594                | 0.0              | 0.0        | 0.0        | 594               | 0.0        | 0.0        | 594                            | 100.0        | 0.0                     | 0.0               | 0.0        |
| Mississippi         | 2002-2014       | 244                | 0.0              | 0.0        | 0.0        | 244               | 0.0        | 0.0        | 244                            | 100.0        | 0.0                     | 0.0               | 0.0        |
| Missouri            | -               | -                  | -                | -          | -          | -                 | -          | -          | -                              | -            | -                       | -                 | -          |
| Montana             | 2000-2014       | 93                 | 0.0              | 0.0        | 0.0        | 93                | 0.0        | 0.0        | 93                             | 100.0        | 0.0                     | 0.0               | 0.0        |
| Nebraska            | 2000-2014       | 194                | 0.0              | 0.0        | 0.0        | 194               | 0.0        | 0.0        | 194                            | 100.0        | 0.0                     | 0.0               | 0.0        |
| New Hampshire       | 2000-2014       | 144                | 0.0              | 0.0        | 0.0        | 144               | 0.0        | 0.0        | 144                            | 100.0        | 0.0                     | 0.0               | 0.0        |
| New Jersey          | 2000-2014       | 1,024              | 0.2              | 0.0        | 0.0        | 1,022             | 0.0        | 0.0        | 1,022                          | 100.0        | 0.0                     | 43.5              | 0.0        |
| New Mexico          | 2000-2014       | 285                | 0.0              | 0.0        | 0.0        | 285               | 0.4        | 0.0        | 284                            | 100.0        | 0.0                     | 24.3              | 0.7        |
| New York            | 2000-2014       | 2,098              | 0.5              | 0.0        | 0.0        | 2,087             | 0.1        | 0.0        | 2,085                          | 100.0        | 0.0                     | 0.0               | 0.0        |
| New York City       | 2000-2014       | 860                | 1.2              | 0.0        | 0.0        | 850               | 0.2        | 0.0        | 848                            | 100.0        | 0.0                     | 0.0               | 0.1        |
| North Carolina      | 2000-2014       | 960                | 0.0              | 0.0        | 0.0        | 960               | 0.0        | 0.0        | 960                            | 100.0        | 0.0                     | 0.0               | 0.0        |
| Ohio                | 2000-2014       | 1,148              | 0.0              | 0.0        | 0.0        | 1,148             | 0.1        | 0.0        | 1,147                          | 100.0        | 0.0                     | 0.0               | 0.0        |
| Oklahoma            | 2000-2010       | 309                | 0.0              | 0.0        | 0.0        | 309               | 0.0        | 0.0        | 309                            | 100.0        | 0.0                     | 0.0               | 0.0        |
| Oregon              | 2000-2013       | 431                | 0.0              | 0.0        | 0.0        | 431               | 0.0        | 0.0        | 431                            | 100.0        | 0.0                     | 0.0               | 0.0        |
| Pennsylvania        | 2000-2014       | 1,337              | 0.1              | 0.0        | 0.0        | 1,335             | 0.1        | 0.0        | 1,333                          | 100.0        | 0.0                     | 0.0               | 0.0        |
| Rhode Island        | 2000-2014       | 112                | 0.0              | 0.0        | 0.0        | 112               | 0.0        | 0.0        | 112                            | 100.0        | 0.0                     | 0.0               | 0.0        |
| South Carolina      | 2000-2014       | 396                | 0.0              | 0.0        | 0.0        | 396               | 0.0        | 0.0        | 396                            | 100.0        | 0.0                     | 0.0               | 0.0        |
| Tennessee           | 2000-2011       | 518                | 0.0              | 0.0        | 0.0        | 518               | 0.0        | 0.0        | 518                            | 100.0        | 0.0                     | 0.0               | 0.0        |
| Texas               | 2000-2013       | 3,229              | 0.3              | 0.0        | 0.0        | 3,218             | 0.1        | 0.0        | 3,214                          | 100.0        | 0.0                     | 0.0               | 0.0        |
| Utah                | 2000-2014       | 391                | 0.0              | 0.0        | 0.0        | 391               | 0.0        | 0.0        | 391                            | 100.0        | 0.0                     | 20.2              | 0.5        |
| Vermont             | 2000-2013       | 71                 | 0.0              | 0.0        | 0.0        | 71                | 0.0        | 0.0        | 71                             | 100.0        | 0.0                     | 0.0               | 0.0        |
| Washington          | 2000-2008       | 420                | 0.0              | 0.0        | 0.0        | 420               | 0.0        | 0.0        | 420                            | 100.0        | 0.0                     | 0.0               | 0.0        |
| Seattle             | 2000-2014       | 498                | 0.0              | 0.0        | 0.0        | 498               | 0.2        | 0.0        | 497                            | 100.0        | 0.0                     | 20.1              | 0.0        |
| West Virginia       | 2000-2014       | 159                | 1.3              | 0.0        | 0.0        | 157               | 0.0        | 0.0        | 157                            | 100.0        | 0.0                     | 0.0               | 0.0        |
| Wisconsin           | 2000-2013       | 602                | 0.2              | 0.0        | 0.0        | 601               | 0.2        | 0.0        | 600                            | 100.0        | 0.0                     | 0.0               | 0.0        |
| Wyoming             | 2000-2013       | 45                 | 0.0              | 0.0        | 0.0        | 45                | 0.0        | 0.0        | 45                             | 100.0        | 0.0                     | 0.0               | 0.0        |
| <b>ASIA</b>         |                 | <b>11,499</b>      | <b>0.2</b>       | <b>0.0</b> | <b>0.2</b> | <b>11,454</b>     | <b>0.1</b> | <b>0.6</b> | <b>11,371</b>                  | <b>100.0</b> | <b>0.0</b>              | <b>0.7</b>        | <b>1.9</b> |
| Chinese registries  | 2003-2013       | 498                | 0.0              | 0.0        | 0.0        | 498               | 0.0        | 0.0        | 498                            | 100.0        | 0.0                     | 9.2               | 1.0        |
| Beijing             | 2003-2013       | 239                | 0.0              | 0.0        | 0.0        | 239               | 0.0        | 0.0        | 239                            | 100.0        | 0.0                     | 17.2              | 2.1        |
| Changle             | 2004-2012       | 6                  | 0.0              | 0.0        | 0.0        | 6                 | 0.0        | 0.0        | 6                              | 100.0        | 0.0                     | 0.0               | 0.0        |
| Cixian              | 2008-2013       | 16                 | 0.0              | 0.0        | 0.0        | 16                | 0.0        | 0.0        | 16                             | 100.0        | 0.0                     | 0.0               | 0.0        |
| Dafeng              | -               | -                  | -                | -          | -          | -                 | -          | -          | -                              | -            | -                       | -                 | -          |
| Dalian              | 2003-2013       | 69                 | 0.0              | 0.0        | 0.0        | 69                | 0.0        | 0.0        | 69                             | 100.0        | 0.0                     | 0.0               | 0.0        |
| Donghai             | 2008-2013       | 6                  | 0.0              | 0.0        | 0.0        | 6                 | 0.0        | 0.0        | 6                              | 100.0        | 0.0                     | 16.7              | 0.0        |
| Feicheng            | 2013-2013       | 1                  | 0.0              | 0.0        | 0.0        | 1                 | 0.0        | 0.0        | 1                              | 100.0        | 0.0                     | 0.0               | 0.0        |
| Ganyu               | 2013-2013       | 1                  | 0.0              | 0.0        | 0.0        | 1                 | 0.0        | 0.0        | 1                              | 100.0        | 0.0                     | 0.0               | 0.0        |
| Guanyun             | 2004-2012       | 11                 | 0.0              | 0.0        | 0.0        | 11                | 0.0        | 0.0        | 11                             | 100.0        | 0.0                     | 0.0               | 0.0        |
| Haimen              | 2003-2011       | 16                 | 0.0              | 0.0        | 0.0        | 16                | 0.0        | 0.0        | 16                             | 100.0        | 0.0                     | 0.0               | 0.0        |
| Haining             | 2003-2013       | 13                 | 0.0              | 0.0        | 0.0        | 13                | 0.0        | 0.0        | 13                             | 100.0        | 0.0                     | 0.0               | 0.0        |
| Jianhu              | 2005-2010       | 6                  | 0.0              | 0.0        | 0.0        | 6                 | 0.0        | 0.0        | 6                              | 100.0        | 0.0                     | 0.0               | 0.0        |
| Jiashan             | 2003-2013       | 7                  | 0.0              | 0.0        | 0.0        | 7                 | 0.0        | 0.0        | 7                              | 100.0        | 0.0                     | 0.0               | 0.0        |
| Jintan              | 2005-2013       | 3                  | 0.0              | 0.0        | 0.0        | 3                 | 0.0        | 0.0        | 3                              | 100.0        | 0.0                     | 33.3              | 0.0        |
| Lianyungang         | 2008-2013       | 11                 | 0.0              | 0.0        | 0.0        | 11                | 0.0        | 0.0        | 11                             | 100.0        | 0.0                     | 27.3              | 0.0        |
| Linzhou             | 2011-2011       | 1                  | 0.0              | 0.0        | 0.0        | 1                 | 0.0        | 0.0        | 1                              | 100.0        | 0.0                     | 0.0               | 0.0        |
| Qidong              | 2003-2011       | 11                 | 0.0              | 0.0        | 0.0        | 11                | 0.0        | 0.0        | 11                             | 100.0        | 0.0                     | 0.0               | 0.0        |
| Sihui               | 2005-2013       | 11                 | 0.0              | 0.0        | 0.0        | 11                | 0.0        | 0.0        | 11                             | 100.0        | 0.0                     | 0.0               | 0.0        |
| Taixing             | -               | -                  | -                | -          | -          | -                 | -          | -          | -                              | -            | -                       | -                 | -          |
| Yangzhong           | -               | -                  | -                | -          | -          | -                 | -          | -          | -                              | -            | -                       | -                 | -          |
| Zhongshan           | 2003-2013       | 70                 | 0.0              | 0.0        | 0.0        | 70                | 0.0        | 0.0        | 70                             | 100.0        | 0.0                     | 0.0               | 0.0        |
| Cyprus *            | 2004-2013       | 58                 | 0.0              | 0.0        | 0.0        | 58                | 3.4        | 0.0        | 56                             | 100.0        | 0.0                     | 0.0               | 62.5       |
| Hong Kong *         | -               | -                  | -                | -          | -          | -                 | -          | -          | -                              | -            | -                       | -                 | -          |
| Indian registries   | 2000-2013       | 32                 | 0.0              | 0.0        | 0.0        | 32                | 0.0        | 0.0        | 32                             | 100.0        | 0.0                     | 0.0               | 0.0        |
| Guwahati            | -               | -                  | -                | -          | -          | -                 | -          | -          | -                              | -            | -                       | -                 | -          |
| Karunagappally      | 2000-2013       | 32                 | 0.0              | 0.0        | 0.0        | 32                | 0.0        | 0.0        | 32                             | 100.0        | 0.0                     | 0.0               | 0.0        |
| Iran (Golestan)     | -               | -                  | -                | -          | -          | -                 | -          | -          | -                              | -            | -                       | -                 | -          |
| Israel *            | 2000-2013       | 757                | 0.0              | 0.0        | 0.0        | 757               | 0.4        | 0.0        | 754                            | 100.0        | 0.0                     | 0.0               | 0.0        |
| Japanese registries | 2000-2013       | 1,450              | 0.3              | 0.0        | 0.0        | 1,445             | 0.5        | 0.0        | 1,438                          | 100.0        | 0.0                     | 0.0               | 2.5        |
| Aichi               | 2003-2013       | 291                | 0.0              | 0.0        | 0.0        | 291               | 0.0        | 0.0        | 291                            | 100.0        | 0.0                     | 0.0               | 3.4        |
| Akita               | 2010-2012       | 2                  | 0.0              | 0.0        | 0.0        | 2                 | 0.0        | 0.0        | 2                              | 100.0        | 0.0                     | 0.0               | 50.0       |
| Ehime               | 2007-2013       | 39                 | 0.0              | 0.0        | 0.0        | 39                | 0.0        | 0.0        | 39                             | 100.0        | 0.0                     | 0.0               | 0.0        |
| Fukui               | 2003-2009       | 17                 | 0.0              | 0.0        | 0.0        | 17                | 0.0        | 0.0        | 17                             | 100.0        | 0.0                     | 0.0               | 0.0        |
| Gunma               | 2003-2011       | 47                 | 8.5              | 0.0        | 0.0        | 43                | 0.0        | 0.0        | 43                             | 100.0        | 0.0                     | 0.0               | 7.0        |
| Hiroshima           | 2004-2008       | 38                 | 0.0              | 0.0        | 0.0        | 38                | 0.0        | 0.0        | 38                             | 100.0        | 0.0                     | 0.0               | 2.6        |
| Hyogo               | 2007-2012       | 77                 | 0.0              | 0.0        | 0.0        | 77                | 0.0        | 0.0        | 77                             | 100.0        | 0.0                     | 0.0               | 2.6        |
| Ibaraki             | 2006-2012       | 63                 | 0.0              | 0.0        | 0.0        | 63                | 0.0        | 0.0        | 63                             | 100.0        | 0.0                     | 0.0               | 4.8        |
| Kanagawa            | 2000-2013       | 201                | 0.0              | 0.0        | 0.0        | 201               | 2.5        | 0.0        | 196                            | 100.0        | 0.0                     | 0.0               | 0.0        |
| Miyagi              | 2000-2010       | 101                | 1.0              | 0.0        | 0.0        | 100               | 0.0        | 0.0        | 100                            | 100.0        | 0.0                     | 0.0               | 2.0        |
| Niigata             | 2000-2013       | 130                | 0.0              | 0.0        | 0.0        | 130               | 0.0        | 0.0        | 130                            | 100.0        | 0.0                     | 0.0               | 0.0        |
| Osaka               | 2000-2008       | 295                | 0.0              | 0.0        | 0.0        | 295               | 0.7        | 0.0        | 293                            | 100.0        | 0.0                     | 0.0               | 4.4        |
| Saga                | 2006-2012       | 29                 | 0.0              | 0.0        | 0.0        | 29                | 0.0        | 0.0        | 29                             | 100.0        | 0.0                     | 0.0               | 0.0        |
| Tochigi             | 2006-2013       | 71                 | 0.0              | 0.0        | 0.0        | 71                | 0.0        | 0.0        | 71                             | 100.0        | 0.0                     | 0.0               | 1.4        |
| Yamagata            | 2003-2013       | 31                 | 0.0              | 0.0        | 0.0        | 31                | 0.0        | 0.0        | 31                             | 100.0        | 0.0                     | 0.0               | 0.0        |
| Yamanashi           | 2008-2012       | 18                 | 0.0              | 0.0        | 0.0        | 18                | 0.0        | 0.0        | 18                             | 100.0        | 0.0                     | 0.0               | 0.0        |
| Jordan *            | 2000-2014       | 681                | 0.0              | 0.0        | 0.0        | 681               | 0.0        | 0.0        | 681                            | 100.0        | 0.0                     | 2.8               | 0.0        |
| Korea * ‡           | 2000-2014       | 3,396              | 0.2              | 0.0        | 0.0        | 3,389             | 0.0        | 0.0        | 3,389                          | 100.0        | 0.0                     | 0.0               | 0.0        |
| Kuwait *            | 2000-2013       | 251                | 0.0              | 0.0        | 0.0        | 251               | 0.0        | 0.0        | 251                            | 100.0        | 0.0                     | 5.2               | 0.4        |
| Malaysia (Penang)   | 2000-2013       | 158                | 0.6              | 0.0        | 0.0        | 157               | 0.0        | 0.6        | 156                            | 100.0        | 0.0                     | 0.0               | 35.9       |
| Mongolia *          | -               | -                  | -                | -          | -          | -                 | -          | -          | -                              | -            | -                       | -                 | -          |
| Qatar *             | 2000-2014       | 73                 | 0.0              | 0.0        | 0.0        | 73                | 2.7        | 0.0        | 71                             | 100.0        | 0.0                     | 0.0               | 38.0       |
| Singapore *         | 2000-2014       | 388                | 0.0              | 0.0        | 0.0        | 388               | 0.0        | 0.0        | 388                            | 100.0        | 0.0                     | 0.0               | 0.0        |
| Taiwan *            | 2000-2014       | 1,811              | 0.0              | 0.0        | 0.0        | 1,811             | 0.0        | 0.0        | 1,811                          | 100.0        | 0.0                     | 0.0               | 0.1        |

Web-table 2.17: Data quality indicators, children diagnosed during 2000-2014, by continent, country and registry: ACUTE LYMPHOBLASTIC LEUKAEMIA (CHILDREN)

|                                | Calendar period | Patients submitted | Ineligible (%) ¶ |            |            | Eligible patients | Excluded (%) |            | Patients included | Data quality indicators (%) †† |                         |                   |            |
|--------------------------------|-----------------|--------------------|------------------|------------|------------|-------------------|--------------|------------|-------------------|--------------------------------|-------------------------|-------------------|------------|
|                                |                 |                    | Incomplete dates | In situ    | Other      |                   | DCO          | Other      |                   | MV                             | Non-specific morphology | Lost to follow-up | Censored   |
| Thai registries                | 2000-2014       | 673                | 0.0              | 0.0        | 0.0        | 673               | 0.0          | 10.1       | 605               | 100.0                          | 0.0                     | 0.2               | 2.8        |
| Bangkok                        | 2001-2012       | 271                | 0.0              | 0.0        | 0.0        | 271               | 0.0          | 25.1       | 203               | 100.0                          | 0.0                     | 0.0               | 0.0        |
| Khon Kaen                      | 2000-2014       | 153                | 0.0              | 0.0        | 0.0        | 153               | 0.0          | 0.0        | 153               | 100.0                          | 0.0                     | 0.0               | 2.0        |
| Lampang                        | 2000-2014       | 56                 | 0.0              | 0.0        | 0.0        | 56                | 0.0          | 0.0        | 56                | 100.0                          | 0.0                     | 0.0               | 0.0        |
| Lamphun                        | 2000-2013       | 19                 | 0.0              | 0.0        | 0.0        | 19                | 0.0          | 0.0        | 19                | 100.0                          | 0.0                     | 0.0               | 0.0        |
| Lopburi                        | 2000-2014       | 54                 | 0.0              | 0.0        | 0.0        | 54                | 0.0          | 0.0        | 54                | 100.0                          | 0.0                     | 0.0               | 25.9       |
| Songkhla                       | 2000-2014       | 120                | 0.0              | 0.0        | 0.0        | 120               | 0.0          | 0.0        | 120               | 100.0                          | 0.0                     | 0.8               | 0.0        |
| Turkish registries             | 2000-2013       | 1,273              | 1.0              | 0.0        | 1.5        | 1,241             | 0.0          | 0.0        | 1,241             | 100.0                          | 0.0                     | 0.4               | 2.9        |
| Ankara                         | 2008-2012       | 336                | 0.0              | 0.0        | 0.0        | 336               | 0.0          | 0.0        | 336               | 100.0                          | 0.0                     | 0.0               | 5.4        |
| Antalya                        | 2006-2012       | 138                | 0.0              | 0.0        | 0.0        | 138               | 0.0          | 0.0        | 138               | 100.0                          | 0.0                     | 0.0               | 0.0        |
| Bursa                          | 2006-2012       | 159                | 1.9              | 0.0        | 11.9       | 137               | 0.0          | 0.0        | 137               | 100.0                          | 0.0                     | 0.0               | 0.0        |
| Edirne                         | 2006-2012       | 22                 | 4.5              | 0.0        | 0.0        | 21                | 0.0          | 0.0        | 21                | 100.0                          | 0.0                     | 0.0               | 0.0        |
| Erzurum                        | 2006-2012       | 63                 | 0.0              | 0.0        | 0.0        | 63                | 0.0          | 0.0        | 63                | 100.0                          | 0.0                     | 0.0               | 1.6        |
| Eskisehir                      | -               | -                  | -                | -          | -          | -                 | -            | -          | -                 | -                              | -                       | -                 | -          |
| Izmir                          | 2000-2013       | 433                | 2.1              | 0.0        | 0.0        | 424               | 0.0          | 0.0        | 424               | 100.0                          | 0.0                     | 0.2               | 3.8        |
| Samsun                         | 2006-2012       | 82                 | 0.0              | 0.0        | 0.0        | 82                | 0.0          | 0.0        | 82                | 100.0                          | 0.0                     | 4.9               | 0.0        |
| Trabzon                        | 2006-2012       | 40                 | 0.0              | 0.0        | 0.0        | 40                | 0.0          | 0.0        | 40                | 100.0                          | 0.0                     | 0.0               | 2.5        |
| <b>EUROPE</b>                  |                 | <b>29,655</b>      | <b>0.0</b>       | <b>0.0</b> | <b>0.1</b> | <b>29,612</b>     | <b>0.0</b>   | <b>0.2</b> | <b>29,544</b>     | <b>100.0</b>                   | <b>0.0</b>              | <b>1.5</b>        | <b>4.3</b> |
| Austria *                      | -               | -                  | -                | -          | -          | -                 | -            | -          | -                 | -                              | -                       | -                 | -          |
| Belarus (Childhood) †          | 2000-2014       | 742                | 0.0              | 0.0        | 0.0        | 742               | 0.3          | 0.0        | 740               | 100.0                          | 0.0                     | 1.2               | 0.0        |
| Belgium *                      | 2004-2014       | 720                | 0.0              | 0.0        | 0.0        | 720               | 0.0          | 0.0        | 720               | 100.0                          | 0.0                     | 2.1               | 0.0        |
| Bulgaria *                     | 2000-2014       | 537                | 0.0              | 0.0        | 0.0        | 537               | 0.0          | 0.0        | 537               | 100.0                          | 0.0                     | 0.2               | 0.0        |
| Croatia *                      | 2000-2014       | 444                | 0.0              | 0.0        | 0.0        | 444               | 0.2          | 0.0        | 443               | 100.0                          | 0.0                     | 0.0               | 0.0        |
| Czech Republic *               | 2000-2014       | 531                | 0.0              | 0.0        | 0.0        | 531               | 0.0          | 0.0        | 531               | 100.0                          | 0.0                     | 0.0               | 0.0        |
| Denmark *                      | 2000-2014       | 574                | 0.0              | 0.0        | 0.0        | 574               | 0.0          | 0.0        | 574               | 100.0                          | 0.0                     | 1.2               | 0.0        |
| Estonia *                      | 2000-2012       | 93                 | 0.0              | 0.0        | 0.0        | 93                | 0.0          | 0.0        | 93                | 100.0                          | 0.0                     | 2.2               | 0.0        |
| Finland *                      | 2000-2014       | 572                | 0.0              | 0.0        | 0.0        | 572               | 0.0          | 0.0        | 572               | 100.0                          | 0.0                     | 0.7               | 0.0        |
| French registries              | 2000-2012       | 4,830              | 0.0              | 0.0        | 0.0        | 4,830             | 0.0          | 0.0        | 4,830             | 100.0                          | 0.0                     | 0.0               | 3.0        |
| Bas-Rhin                       | -               | -                  | -                | -          | -          | -                 | -            | -          | -                 | -                              | -                       | -                 | -          |
| Basse Normandie                | -               | -                  | -                | -          | -          | -                 | -            | -          | -                 | -                              | -                       | -                 | -          |
| Burgundy Digestive             | -               | -                  | -                | -          | -          | -                 | -            | -          | -                 | -                              | -                       | -                 | -          |
| Calvados                       | -               | -                  | -                | -          | -          | -                 | -            | -          | -                 | -                              | -                       | -                 | -          |
| Calvados Digestive             | -               | -                  | -                | -          | -          | -                 | -            | -          | -                 | -                              | -                       | -                 | -          |
| Côte-d'Or Gynaecologic         | -               | -                  | -                | -          | -          | -                 | -            | -          | -                 | -                              | -                       | -                 | -          |
| Côte-d'Or Haematopoietic       | -               | -                  | -                | -          | -          | -                 | -            | -          | -                 | -                              | -                       | -                 | -          |
| Doubs                          | -               | -                  | -                | -          | -          | -                 | -            | -          | -                 | -                              | -                       | -                 | -          |
| Finistère                      | -               | -                  | -                | -          | -          | -                 | -            | -          | -                 | -                              | -                       | -                 | -          |
| Gironde CNS                    | -               | -                  | -                | -          | -          | -                 | -            | -          | -                 | -                              | -                       | -                 | -          |
| Gironde General                | -               | -                  | -                | -          | -          | -                 | -            | -          | -                 | -                              | -                       | -                 | -          |
| Gironde Haematopoietic         | -               | -                  | -                | -          | -          | -                 | -            | -          | -                 | -                              | -                       | -                 | -          |
| Haut-Rhin                      | -               | -                  | -                | -          | -          | -                 | -            | -          | -                 | -                              | -                       | -                 | -          |
| Haute-Vienne                   | -               | -                  | -                | -          | -          | -                 | -            | -          | -                 | -                              | -                       | -                 | -          |
| Hérault                        | -               | -                  | -                | -          | -          | -                 | -            | -          | -                 | -                              | -                       | -                 | -          |
| Isère                          | -               | -                  | -                | -          | -          | -                 | -            | -          | -                 | -                              | -                       | -                 | -          |
| Lille Metro                    | -               | -                  | -                | -          | -          | -                 | -            | -          | -                 | -                              | -                       | -                 | -          |
| Loire-Atlantique               | -               | -                  | -                | -          | -          | -                 | -            | -          | -                 | -                              | -                       | -                 | -          |
| Manche                         | -               | -                  | -                | -          | -          | -                 | -            | -          | -                 | -                              | -                       | -                 | -          |
| Somme                          | -               | -                  | -                | -          | -          | -                 | -            | -          | -                 | -                              | -                       | -                 | -          |
| Tarn                           | -               | -                  | -                | -          | -          | -                 | -            | -          | -                 | -                              | -                       | -                 | -          |
| France Childhood Haem †        | 2000-2012       | 4,830              | 0.0              | 0.0        | 0.0        | 4,830             | 0.0          | 0.0        | 4,830             | 100.0                          | 0.0                     | 0.0               | 3.0        |
| France Childhood Solid †       | -               | -                  | -                | -          | -          | -                 | -            | -          | -                 | -                              | -                       | -                 | -          |
| German registries              | 2000-2013       | 1,027              | 0.1              | 0.0        | 0.6        | 1,020             | 0.1          | 0.0        | 1,019             | 100.0                          | 0.0                     | 0.4               | 27.4       |
| Brandenburg                    | -               | -                  | -                | -          | -          | -                 | -            | -          | -                 | -                              | -                       | -                 | -          |
| Bremen                         | 2000-2013       | 37                 | 0.0              | 0.0        | 0.0        | 37                | 0.0          | 0.0        | 37                | 100.0                          | 0.0                     | 10.8              | 0.0        |
| Hamburg                        | -               | -                  | -                | -          | -          | -                 | -            | -          | -                 | -                              | -                       | -                 | -          |
| Lower Saxony                   | 2003-2013       | 488                | 0.2              | 0.0        | 1.2        | 481               | 0.2          | 0.0        | 480               | 100.0                          | 0.0                     | 0.0               | 36.3       |
| Mecklenburg-W. Pomerania       | -               | -                  | -                | -          | -          | -                 | -            | -          | -                 | -                              | -                       | -                 | -          |
| Rhineland Palatinate           | 2000-2013       | 332                | 0.0              | 0.0        | 0.0        | 332               | 0.0          | 0.0        | 332               | 100.0                          | 0.0                     | 0.0               | 31.6       |
| Saarland                       | 2001-2012       | 39                 | 0.0              | 0.0        | 0.0        | 39                | 0.0          | 0.0        | 39                | 100.0                          | 0.0                     | 0.0               | 0.0        |
| Saxony                         | -               | -                  | -                | -          | -          | -                 | -            | -          | -                 | -                              | -                       | -                 | -          |
| Schleswig-Holstein             | 2001-2012       | 131                | 0.0              | 0.0        | 0.0        | 131               | 0.0          | 0.0        | 131               | 100.0                          | 0.0                     | 0.0               | 0.0        |
| Thuringia                      | -               | -                  | -                | -          | -          | -                 | -            | -          | -                 | -                              | -                       | -                 | -          |
| Gibraltar *                    | -               | -                  | -                | -          | -          | -                 | -            | -          | -                 | -                              | -                       | -                 | -          |
| Greece (National Paediatric) † | 2000-2014       | 1,092              | 0.0              | 0.0        | 0.0        | 1,092             | 0.0          | 0.0        | 1,092             | 100.0                          | 0.0                     | 0.1               | 0.2        |
| Iceland *                      | 2000-2014       | 32                 | 0.0              | 0.0        | 0.0        | 32                | 3.1          | 0.0        | 31                | 100.0                          | 0.0                     | 0.0               | 0.0        |
| Ireland *                      | 2000-2013       | 462                | 0.0              | 0.0        | 0.2        | 461               | 0.0          | 0.0        | 461               | 100.0                          | 0.0                     | 0.0               | 0.0        |
| Italian registries             | 2000-2014       | 2,022              | 0.0              | 0.0        | 0.0        | 2,022             | 0.0          | 0.0        | 2,022             | 100.0                          | 0.0                     | 1.4               | 2.0        |
| Alto Adige                     | 2000-2010       | 43                 | 0.0              | 0.0        | 0.0        | 43                | 0.0          | 0.0        | 43                | 100.0                          | 0.0                     | 0.0               | 0.0        |
| Barletta-Andria-Trani          | 2006-2012       | 25                 | 0.0              | 0.0        | 0.0        | 25                | 0.0          | 0.0        | 25                | 100.0                          | 0.0                     | 4.0               | 0.0        |
| Basilicata                     | 2006-2006       | 3                  | 0.0              | 0.0        | 0.0        | 3                 | 0.0          | 0.0        | 3                 | 100.0                          | 0.0                     | 0.0               | 33.3       |
| Bergamo                        | 2007-2012       | 40                 | 0.0              | 0.0        | 0.0        | 40                | 0.0          | 0.0        | 40                | 100.0                          | 0.0                     | 0.0               | 0.0        |
| Biella-Vercelli                | 2001-2010       | -                  | -                | -          | -          | -                 | -            | -          | -                 | -                              | -                       | -                 | -          |
| Brescia                        | 2000-2008       | 40                 | 0.0              | 0.0        | 0.0        | 40                | 0.0          | 0.0        | 40                | 100.0                          | 0.0                     | 2.5               | 0.0        |
| Brindisi                       | 2006-2008       | 6                  | 0.0              | 0.0        | 0.0        | 6                 | 0.0          | 0.0        | 6                 | 100.0                          | 0.0                     | 0.0               | 0.0        |
| Caserta                        | 2008-2010       | 11                 | 0.0              | 0.0        | 0.0        | 11                | 0.0          | 0.0        | 11                | 100.0                          | 0.0                     | 0.0               | 9.1        |
| Catania-Messina-Enna           | 2003-2012       | 145                | 0.0              | 0.0        | 0.0        | 145               | 0.0          | 0.0        | 145               | 100.0                          | 0.0                     | 0.0               | 4.8        |
| Catanzaro                      | 2003-2009       | 16                 | 0.0              | 0.0        | 0.0        | 16                | 0.0          | 0.0        | 16                | 100.0                          | 0.0                     | 0.0               | 0.0        |
| Como                           | 2003-2011       | 37                 | 0.0              | 0.0        | 0.0        | 37                | 0.0          | 0.0        | 37                | 100.0                          | 0.0                     | 2.7               | 0.0        |
| Cremona                        | 2005-2008       | 4                  | 0.0              | 0.0        | 0.0        | 4                 | 0.0          | 0.0        | 4                 | 100.0                          | 0.0                     | 0.0               | 0.0        |
| Ferrara                        | 2000-2008       | 7                  | 0.0              | 0.0        | 0.0        | 7                 | 0.0          | 0.0        | 7                 | 100.0                          | 0.0                     | 14.3              | 0.0        |
| Friuli-Venezia-Giulia          | 2000-2010       | 71                 | 0.0              | 0.0        | 0.0        | 71                | 0.0          | 0.0        | 71                | 100.0                          | 0.0                     | 1.4               | 0.0        |
| Genoa                          | 2000-2009       | 31                 | 0.0              | 0.0        | 0.0        | 31                | 0.0          | 0.0        | 31                | 100.0                          | 0.0                     | 0.0               | 0.0        |
| Latina                         | 2000-2011       | 38                 | 0.0              | 0.0        | 0.0        | 38                | 0.0          | 0.0        | 38                | 100.0                          | 0.0                     | 0.0               | 21.1       |
| Lecce                          | 2003-2008       | 30                 | 0.0              | 0.0        | 0.0        | 30                | 0.0          | 0.0        | 30                | 100.0                          | 0.0                     | 0.0               | 0.0        |

Web-table 2.17: Data quality indicators, children diagnosed during 2000-2014, by continent, country and registry: ACUTE LYMPHOBLASTIC LEUKAEMIA (CHILDREN)

|                      | Calendar period | Patients submitted | Ineligible (%) ¶ |         |       | Eligible patients | Excluded (%) |       | Patients included | Data quality indicators (%) †† |                         |                   |          |
|----------------------|-----------------|--------------------|------------------|---------|-------|-------------------|--------------|-------|-------------------|--------------------------------|-------------------------|-------------------|----------|
|                      |                 |                    | Incomplete dates | In situ | Other |                   | DCO          | Other |                   | MV                             | Non-specific morphology | Lost to follow-up | Censored |
| Mantova              | 2001-2010       | 19                 | 0.0              | 0.0     | 0.0   | 19                | 0.0          | 0.0   | 19                | 100.0                          | 0.0                     | 0.0               | 0.0      |
| Milano               | 2000-2011       | 139                | 0.0              | 0.0     | 0.0   | 139               | 0.0          | 0.0   | 139               | 100.0                          | 0.0                     | 6.5               | 0.0      |
| Modena               | 2000-2012       | 48                 | 0.0              | 0.0     | 0.0   | 48                | 0.0          | 0.0   | 48                | 100.0                          | 0.0                     | 0.0               | 4.2      |
| Monza-Brianza        | 2007-2012       | 28                 | 0.0              | 0.0     | 0.0   | 28                | 0.0          | 0.0   | 28                | 100.0                          | 0.0                     | 3.6               | 0.0      |
| Naples               | 2000-2012       | 77                 | 0.0              | 0.0     | 0.0   | 77                | 0.0          | 0.0   | 77                | 100.0                          | 0.0                     | 2.6               | 0.0      |
| Nuoro                | 2003-2012       | 12                 | 0.0              | 0.0     | 0.0   | 12                | 0.0          | 0.0   | 12                | 100.0                          | 0.0                     | 0.0               | 0.0      |
| Palermo              | 2003-2012       | 73                 | 0.0              | 0.0     | 0.0   | 73                | 0.0          | 0.0   | 73                | 100.0                          | 0.0                     | 0.0               | 0.0      |
| Parma                | 2000-2014       | 34                 | 0.0              | 0.0     | 0.0   | 34                | 0.0          | 0.0   | 34                | 100.0                          | 0.0                     | 2.9               | 0.0      |
| Pavia                | 2003-2009       | 18                 | 0.0              | 0.0     | 0.0   | 18                | 0.0          | 0.0   | 18                | 100.0                          | 0.0                     | 11.1              | 5.6      |
| Piacenza             | 2007-2011       | 10                 | 0.0              | 0.0     | 0.0   | 10                | 0.0          | 0.0   | 10                | 100.0                          | 0.0                     | 0.0               | 10.0     |
| Ragusa               | 2000-2012       | 31                 | 0.0              | 0.0     | 0.0   | 31                | 0.0          | 0.0   | 31                | 100.0                          | 0.0                     | 0.0               | 0.0      |
| Reggio Emilia        | 2000-2012       | 38                 | 0.0              | 0.0     | 0.0   | 38                | 0.0          | 0.0   | 38                | 100.0                          | 0.0                     | 7.9               | 0.0      |
| Romagna              | 2000-2012       | 79                 | 0.0              | 0.0     | 0.0   | 79                | 0.0          | 0.0   | 79                | 100.0                          | 0.0                     | 0.0               | 0.0      |
| Salerno              | 2000-2009       | 67                 | 0.0              | 0.0     | 0.0   | 67                | 0.0          | 0.0   | 67                | 100.0                          | 0.0                     | 1.5               | 10.4     |
| Sassari              | 2000-2011       | 32                 | 0.0              | 0.0     | 0.0   | 32                | 0.0          | 0.0   | 32                | 100.0                          | 0.0                     | 0.0               | 0.0      |
| Siracusa             | 2000-2011       | 30                 | 0.0              | 0.0     | 0.0   | 30                | 0.0          | 0.0   | 30                | 100.0                          | 0.0                     | 0.0               | 0.0      |
| Sondrio              | 2000-2011       | 14                 | 0.0              | 0.0     | 0.0   | 14                | 0.0          | 0.0   | 14                | 100.0                          | 0.0                     | 0.0               | 0.0      |
| Taranto              | 2006-2012       | 23                 | 0.0              | 0.0     | 0.0   | 23                | 0.0          | 0.0   | 23                | 100.0                          | 0.0                     | 0.0               | 0.0      |
| Trapani              | 2002-2010       | 27                 | 0.0              | 0.0     | 0.0   | 27                | 0.0          | 0.0   | 27                | 100.0                          | 0.0                     | 0.0               | 0.0      |
| Trento               | 2000-2010       | 43                 | 0.0              | 0.0     | 0.0   | 43                | 0.0          | 0.0   | 43                | 100.0                          | 0.0                     | 7.0               | 0.0      |
| Turin                | 2000-2012       |                    |                  |         |       |                   |              |       |                   |                                |                         |                   |          |
| Tuscany              | 2000-2009       | 66                 | 0.0              | 0.0     | 0.0   | 66                | 0.0          | 0.0   | 66                | 100.0                          | 0.0                     | 0.0               | 6.1      |
| Umbria               | 2000-2013       | 75                 | 0.0              | 0.0     | 0.0   | 75                | 0.0          | 0.0   | 75                | 100.0                          | 0.0                     | 0.0               | 0.0      |
| Varese               | 2000-2012       | 74                 | 0.0              | 0.0     | 0.0   | 74                | 0.0          | 0.0   | 74                | 100.0                          | 0.0                     | 0.0               | 1.4      |
| Veneto               | 2000-2009       | 109                | 0.0              | 0.0     | 0.0   | 109               | 0.0          | 0.0   | 109               | 100.0                          | 0.0                     | 1.8               | 6.4      |
| Viterbo              | 2006-2009       | 7                  | 0.0              | 0.0     | 0.0   | 7                 | 0.0          | 0.0   | 7                 | 100.0                          | 0.0                     | 0.0               | 14.3     |
| Piedmont Childhood   | 2000-2011       | 302                | 0.0              | 0.0     | 0.0   | 302               | 0.0          | 0.0   | 302               | 100.0                          | 0.0                     | 0.0               | 0.0      |
| Latvia *             | 2000-2014       | 148                | 0.0              | 0.0     | 0.0   | 148               | 0.0          | 0.7   | 147               | 100.0                          | 0.0                     | 0.0               | 0.0      |
| Lithuania *          | 2000-2012       | 250                | 0.0              | 0.0     | 0.0   | 250               | 0.0          | 0.0   | 250               | 100.0                          | 0.0                     | 0.0               | 0.0      |
| Malta *              | 2000-2013       | 35                 | 0.0              | 0.0     | 0.0   | 35                | 0.0          | 0.0   | 35                | 100.0                          | 0.0                     | 0.0               | 0.0      |
| Netherlands *        | 2000-2014       | 1,607              | 0.0              | 0.0     | 0.1   | 1,605             | 0.1          | 1.0   | 1,588             | 100.0                          | 0.0                     | 2.6               | 0.0      |
| Norway *             | 2000-2014       | 511                | 0.0              | 0.0     | 0.0   | 511               | 0.0          | 0.0   | 511               | 100.0                          | 0.0                     | 2.0               | 0.0      |
| Poland *             | 2000-2014       | 2,540              | 0.0              | 0.0     | 0.0   | 2,540             | 0.0          | 1.4   | 2,505             | 100.0                          | 0.0                     | 0.0               | 0.0      |
| Greater Poland       | 2000-2014       | 292                | 0.0              | 0.0     | 0.0   | 292               | 0.0          | 0.3   | 291               | 100.0                          | 0.0                     | 0.0               | 0.0      |
| Holy Cross           | 2000-2014       | 102                | 0.0              | 0.0     | 0.0   | 102               | 0.0          | 1.0   | 101               | 100.0                          | 0.0                     | 0.0               | 0.0      |
| Kujavia-Pomerania    | 2000-2014       | 164                | 0.0              | 0.0     | 0.0   | 164               | 0.0          | 0.6   | 163               | 100.0                          | 0.0                     | 0.0               | 0.0      |
| Lesser Poland        | 2000-2014       | 259                | 0.0              | 0.0     | 0.0   | 259               | 0.0          | 0.0   | 259               | 100.0                          | 0.0                     | 0.0               | 0.0      |
| Łódź                 | 2000-2014       | 96                 | 0.0              | 0.0     | 0.0   | 96                | 0.0          | 24.0  | 73                | 100.0                          | 0.0                     | 0.0               | 0.0      |
| Lower Silesia        | -               |                    |                  |         |       |                   |              |       |                   |                                |                         |                   |          |
| Lublin               | 2000-2014       | 181                | 0.0              | 0.0     | 0.0   | 181               | 0.0          | 0.0   | 181               | 100.0                          | 0.0                     | 0.0               | 0.6      |
| Lubush               | 2000-2014       | 58                 | 0.0              | 0.0     | 0.0   | 58                | 0.0          | 1.7   | 57                | 100.0                          | 0.0                     | 0.0               | 0.0      |
| Mazovia              | 2000-2014       | 367                | 0.0              | 0.0     | 0.0   | 367               | 0.0          | 0.5   | 365               | 100.0                          | 0.0                     | 0.0               | 0.0      |
| Opole                | 2000-2014       | 61                 | 0.0              | 0.0     | 0.0   | 61                | 0.0          | 0.0   | 61                | 100.0                          | 0.0                     | 0.0               | 0.0      |
| Podlaha              | 2000-2014       | 109                | 0.0              | 0.0     | 0.0   | 109               | 0.0          | 0.0   | 109               | 100.0                          | 0.0                     | 0.0               | 0.0      |
| Pomerania            | 2000-2014       | 153                | 0.0              | 0.0     | 0.0   | 153               | 0.0          | 0.0   | 153               | 100.0                          | 0.0                     | 0.0               | 0.0      |
| Silesia              | 2000-2014       | 313                | 0.0              | 0.0     | 0.0   | 313               | 0.0          | 1.6   | 308               | 100.0                          | 0.0                     | 0.0               | 0.0      |
| Subcarpathia         | 2000-2014       | 174                | 0.0              | 0.0     | 0.0   | 174               | 0.0          | 0.6   | 173               | 100.0                          | 0.0                     | 0.0               | 0.0      |
| Varmia-Mazuria       | 2000-2014       | 105                | 0.0              | 0.0     | 0.0   | 105               | 0.0          | 0.0   | 105               | 100.0                          | 0.0                     | 0.0               | 0.0      |
| West Pomerania       | 2000-2014       | 106                | 0.0              | 0.0     | 0.0   | 106               | 0.0          | 0.0   | 106               | 100.0                          | 0.0                     | 0.0               | 0.0      |
| Portugal *           | 2000-2014       | 627                | 0.0              | 0.0     | 0.0   | 627               | 0.0          | 0.0   | 627               | 100.0                          | 0.0                     | 1.3               | 0.2      |
| Azores               | 2000-2013       | 18                 | 0.0              | 0.0     | 0.0   | 18                | 0.0          | 0.0   | 18                | 100.0                          | 0.0                     | 0.0               | 0.0      |
| Portugal Central     | 2003-2010       | 81                 | 0.0              | 0.0     | 0.0   | 81                | 0.0          | 0.0   | 81                | 100.0                          | 0.0                     | 0.0               | 1.2      |
| Portugal North       | 2000-2010       | 168                | 0.0              | 0.0     | 0.0   | 168               | 0.0          | 0.0   | 168               | 100.0                          | 0.0                     | 0.0               | 0.0      |
| Portugal South       | 2000-2014       | 360                | 0.0              | 0.0     | 0.0   | 360               | 0.0          | 0.0   | 360               | 100.0                          | 0.0                     | 2.2               | 0.0      |
| Romania (Cluj)       | 2006-2012       | 21                 | 0.0              | 0.0     | 0.0   | 21                | 0.0          | 0.0   | 21                | 100.0                          | 0.0                     | 0.0               | 0.0      |
| Russian registries ‡ | 2000-2014       | 349                | 0.0              | 0.0     | 8.3   | 320               | 0.0          | 0.0   | 320               | 100.0                          | 0.0                     | 3.4               | 0.0      |
| Arkhangelsk          | 2000-2014       | 77                 | 0.0              | 0.0     | 0.0   | 77                | 0.0          | 0.0   | 77                | 100.0                          | 0.0                     | 1.3               | 0.0      |
| Karelia              | 2002-2009       | 2                  | 0.0              | 0.0     | 0.0   | 2                 | 0.0          | 0.0   | 2                 | 100.0                          | 0.0                     | 0.0               | 0.0      |
| Omsk                 | -               |                    |                  |         |       |                   |              |       |                   |                                |                         |                   |          |
| Samara               | 2000-2014       | 270                | 0.0              | 0.0     | 10.7  | 241               | 0.0          | 0.0   | 241               | 100.0                          | 0.0                     | 4.1               | 0.0      |
| Tomsk                | -               |                    |                  |         |       |                   |              |       |                   |                                |                         |                   |          |
| Slovakia *           | 2000-2010       | 306                | 0.0              | 0.0     | 0.0   | 306               | 0.7          | 0.0   | 304               | 100.0                          | 0.0                     | 0.0               | 0.0      |
| Slovenia *           | 2000-2013       | 122                | 0.0              | 0.0     | 0.0   | 122               | 0.0          | 0.0   | 122               | 100.0                          | 0.0                     | 0.0               | 0.0      |
| Spanish registries   | 2000-2014       | 1,919              | 0.0              | 0.0     | 0.0   | 1,919             | 0.1          | 0.0   | 1,917             | 100.0                          | 0.0                     | 0.3               | 40.8     |
| Basque Country       | 2000-2013       | 152                | 0.0              | 0.0     | 0.0   | 152               | 0.0          | 0.0   | 152               | 100.0                          | 0.0                     | 1.3               | 0.0      |
| Canaries             | 2000-2011       | 93                 | 0.0              | 0.0     | 0.0   | 93                | 0.0          | 0.0   | 93                | 100.0                          | 0.0                     | 0.0               | 0.0      |
| Girona               | 2000-2013       | 57                 | 0.0              | 0.0     | 0.0   | 57                | 3.5          | 0.0   | 55                | 100.0                          | 0.0                     | 3.6               | 0.0      |
| Granada              | 2000-2012       | 60                 | 0.0              | 0.0     | 0.0   | 60                | 0.0          | 0.0   | 60                | 100.0                          | 0.0                     | 0.0               | 0.0      |
| Mallorca             | 2000-2012       | 55                 | 0.0              | 0.0     | 0.0   | 55                | 0.0          | 0.0   | 55                | 100.0                          | 0.0                     | 1.8               | 0.0      |
| Murcia               | 2000-2010       | 104                | 0.0              | 0.0     | 0.0   | 104               | 0.0          | 0.0   | 104               | 100.0                          | 0.0                     | 0.0               | 0.0      |
| Navarra              | 2000-2010       | 37                 | 0.0              | 0.0     | 0.0   | 37                | 0.0          | 0.0   | 37                | 100.0                          | 0.0                     | 0.0               | 0.0      |
| Tarragona            | 2000-2011       | 43                 | 0.0              | 0.0     | 0.0   | 43                | 0.0          | 0.0   | 43                | 100.0                          | 0.0                     | 0.0               | 0.0      |
| Spain Childhood      | 2000-2014       | 1,005              | 0.0              | 0.0     | 0.0   | 1,005             | 0.0          | 0.0   | 1,005             | 100.0                          | 0.0                     | 0.0               | 77.8     |
| Valencia Childhood   | 2000-2012       | 313                | 0.0              | 0.0     | 0.0   | 313               | 0.0          | 0.0   | 313               | 100.0                          | 0.0                     | 0.0               | 0.0      |
| Sweden *             | 2000-2014       | 926                | 0.0              | 0.0     | 0.0   | 926               | 0.0          | 0.0   | 926               | 100.0                          | 0.0                     | 0.6               | 0.1      |
| Swiss registries     | 2000-2014       | 733                | 0.0              | 0.0     | 0.0   | 733               | 0.0          | 0.0   | 733               | 100.0                          | 0.0                     | 1.4               | 0.4      |
| Basel                | 2001-2011       |                    |                  |         |       |                   |              |       |                   |                                |                         |                   |          |
| Fribourg             | -               |                    |                  |         |       |                   |              |       |                   |                                |                         |                   |          |
| Geneva               | 2000-2013       |                    |                  |         |       |                   |              |       |                   |                                |                         |                   |          |
| Graubünden-Glarus    | 2001-2014       |                    |                  |         |       |                   |              |       |                   |                                |                         |                   |          |
| Neuchâtel            | 2000-2013       |                    |                  |         |       |                   |              |       |                   |                                |                         |                   |          |
| St Gallen-Appenzell  | 2000-2012       |                    |                  |         |       |                   |              |       |                   |                                |                         |                   |          |
| Ticino               | 2000-2014       |                    |                  |         |       |                   |              |       |                   |                                |                         |                   |          |
| Valais               | 2000-2014       |                    |                  |         |       |                   |              |       |                   |                                |                         |                   |          |

Web-table 2.17: Data quality indicators, children diagnosed during 2000-2014, by continent, country and registry: ACUTE LYMPHOBLASTIC LEUKAEMIA (CHILDREN)

|                              | Calendar period | Patients submitted | Ineligible (%) ¶ |            |            | Eligible patients | Excluded (%) |            | Patients included | Data quality indicators (%) †† |                         |                   |            |
|------------------------------|-----------------|--------------------|------------------|------------|------------|-------------------|--------------|------------|-------------------|--------------------------------|-------------------------|-------------------|------------|
|                              |                 |                    | Incomplete dates | In situ    | Other      |                   | DCO          | Other      |                   | MV                             | Non-specific morphology | Lost to follow-up | Censored   |
| Zürich                       | 2000-2013       |                    |                  |            |            |                   |              |            |                   |                                |                         |                   |            |
| Switzerland (Childhood) †    | 2000-2014       | 733                | 0.0              | 0.0        | 0.0        | 733               | 0.0          | 0.0        | 733               | 100.0                          | 0.0                     | 1.4               | 0.4        |
| United Kingdom *             | 2000-2014       | 5,883              | 0.1              | 0.0        | 0.0        | 5,879             | 0.0          | 0.1        | 5,873             | 100.0                          | 0.0                     | 4.7               | 0.0        |
| England                      | 2000-2014       | 4,934              | 0.1              | 0.0        | 0.0        | 4,930             | 0.0          | 0.1        | 4,925             | 100.0                          | 0.0                     | 5.6               | 0.0        |
| Northern Ireland             | 2000-2014       | 176                | 0.0              | 0.0        | 0.0        | 176               | 0.0          | 0.0        | 176               | 100.0                          | 0.0                     | 0.0               | 0.0        |
| Scotland                     | 2000-2014       | 494                | 0.0              | 0.0        | 0.0        | 494               | 0.2          | 0.0        | 493               | 100.0                          | 0.0                     | 0.4               | 0.2        |
| Wales                        | 2000-2014       | 279                | 0.0              | 0.0        | 0.0        | 279               | 0.0          | 0.0        | 279               | 100.0                          | 0.0                     | 0.0               | 0.0        |
| <b>OCEANIA</b>               |                 | <b>3,089</b>       | <b>0.3</b>       | <b>0.0</b> | <b>0.0</b> | <b>3,080</b>      | <b>0.1</b>   | <b>0.0</b> | <b>3,078</b>      | <b>100.0</b>                   | <b>0.0</b>              | <b>0.0</b>        | <b>0.0</b> |
| Australia *                  | 2000-2014       | 2,574              | 0.3              | 0.0        | 0.0        | 2,565             | 0.0          | 0.0        | 2,565             | 100.0                          | 0.0                     | 0.0               | 0.0        |
| Australian Capital Territory | 2000-2013       | 39                 | 0.0              | 0.0        | 0.0        | 39                | 0.0          | 0.0        | 39                | 100.0                          | 0.0                     | 0.0               | 0.0        |
| New South Wales              | 2000-2012       | 728                | 0.1              | 0.0        | 0.0        | 727               | 0.0          | 0.0        | 727               | 100.0                          | 0.0                     | 0.0               | 0.0        |
| Northern Territory           | 2000-2012       | 17                 | 0.0              | 0.0        | 0.0        | 17                | 0.0          | 0.0        | 17                | 100.0                          | 0.0                     | 0.0               | 0.0        |
| Queensland                   | 2000-2014       | 611                | 1.3              | 0.0        | 0.0        | 603               | 0.0          | 0.0        | 603               | 100.0                          | 0.0                     | 0.0               | 0.0        |
| South Australia              | 2000-2013       | 173                | 0.0              | 0.0        | 0.0        | 173               | 0.0          | 0.0        | 173               | 100.0                          | 0.0                     | 0.0               | 0.0        |
| Tasmania                     | 2000-2013       | 46                 | 0.0              | 0.0        | 0.0        | 46                | 0.0          | 0.0        | 46                | 100.0                          | 0.0                     | 0.0               | 0.0        |
| Victoria                     | 2000-2014       | 719                | 0.0              | 0.0        | 0.0        | 719               | 0.0          | 0.0        | 719               | 100.0                          | 0.0                     | 0.0               | 0.0        |
| Western Australia            | 2000-2014       | 241                | 0.0              | 0.0        | 0.0        | 241               | 0.0          | 0.0        | 241               | 100.0                          | 0.0                     | 0.0               | 0.0        |
| New Zealand *                | 2000-2014       | 515                | 0.0              | 0.0        | 0.0        | 515               | 0.4          | 0.0        | 513               | 100.0                          | 0.0                     | 0.0               | 0.0        |
| <b>Total</b>                 |                 | <b>89,013</b>      | <b>0.7</b>       | <b>0.0</b> | <b>0.7</b> | <b>87,758</b>     | <b>0.3</b>   | <b>0.2</b> | <b>87,351</b>     | <b>100.0</b>                   | <b>0.0</b>              | <b>2.2</b>        | <b>3.5</b> |

Web-table 2.18: Data quality indicators, children diagnosed during 2000-2014, by continent, country and registry: LYMPHOMAS (CHILDREN)

|                                    | Calendar period | Patients submitted | Ineligible (%) ¶ |            |            | Eligible patients | Excluded (%) |            | Patients included | Data quality indicators (%) †† |                         |                   |             |
|------------------------------------|-----------------|--------------------|------------------|------------|------------|-------------------|--------------|------------|-------------------|--------------------------------|-------------------------|-------------------|-------------|
|                                    |                 |                    | Incomplete dates | In situ    | Other      |                   | DCO          | Other      |                   | MV                             | Non-specific morphology | Lost to follow-up | Censored    |
| <b>AFRICA</b>                      |                 | <b>298</b>         | <b>21.5</b>      | <b>0.0</b> | <b>0.3</b> | <b>233</b>        | <b>0.4</b>   | <b>1.7</b> | <b>228</b>        | <b>96.9</b>                    | <b>11.4</b>             | <b>2.2</b>        | <b>45.2</b> |
| Algerian registries                | 2000-2014       | 118                | 0.8              | 0.0        | 0.0        | 117               | 0.0          | 1.7        | 115               | 100.0                          | 9.6                     | 0.0               | 28.7        |
| Annaba                             | 2000-2014       | 41                 | 2.4              | 0.0        | 0.0        | 40                | 0.0          | 0.0        | 40                | 100.0                          | 5.0                     | 0.0               | 82.5        |
| Sétif                              | 2002-2010       | 17                 | 0.0              | 0.0        | 0.0        | 17                | 0.0          | 5.9        | 16                | 100.0                          | 0.0                     | 0.0               | 0.0         |
| Tlemcen                            | 2006-2014       | 60                 | 0.0              | 0.0        | 0.0        | 60                | 0.0          | 1.7        | 59                | 100.0                          | 15.3                    | 0.0               | 0.0         |
| Mali (Bamako)                      | -               | -                  | -                | -          | -          | -                 | -            | -          | -                 | -                              | -                       | -                 | -           |
| Mauritius *                        | 2010-2012       | 5                  | 0.0              | 0.0        | 0.0        | 5                 | 0.0          | 0.0        | 5                 | 100.0                          | 0.0                     | 0.0               | 0.0         |
| Morocco (Casablanca)               | -               | -                  | -                | -          | -          | -                 | -            | -          | -                 | -                              | -                       | -                 | -           |
| Nigeria (Ibadan)                   | 2005-2014       | 152                | 41.4             | 0.0        | 0.7        | 88                | 1.1          | 2.3        | 85                | 96.5                           | 9.4                     | 0.0               | 65.9        |
| South Africa (Eastern Cape)        | 2000-2014       | 23                 | 0.0              | 0.0        | 0.0        | 23                | 0.0          | 0.0        | 23                | 82.6                           | 30.4                    | 21.7              | 60.9        |
| <b>AMERICA (Central and South)</b> |                 | <b>5,640</b>       | <b>2.2</b>       | <b>0.0</b> | <b>5.5</b> | <b>5,205</b>      | <b>1.4</b>   | <b>1.3</b> | <b>5,065</b>      | <b>99.3</b>                    | <b>8.2</b>              | <b>10.3</b>       | <b>4.6</b>  |
| Argentinian registries             | 2000-2014       | 2,039              | 0.0              | 0.0        | 0.2        | 2,035             | 2.8          | 1.2        | 1,955             | 100.0                          | 1.4                     | 0.0               | 0.0         |
| Chubut                             | -               | -                  | -                | -          | -          | -                 | -            | -          | -                 | -                              | -                       | -                 | -           |
| Córdoba                            | -               | -                  | -                | -          | -          | -                 | -            | -          | -                 | -                              | -                       | -                 | -           |
| Mendoza                            | 2003-2013       | -                  | -                | -          | -          | -                 | -            | -          | -                 | -                              | -                       | -                 | -           |
| Tierra del Fuego                   | -               | -                  | -                | -          | -          | -                 | -            | -          | -                 | -                              | -                       | -                 | -           |
| Argentina (Childhood) †            | 2000-2014       | 2,039              | 0.0              | 0.0        | 0.2        | 2,035             | 2.8          | 1.2        | 1,955             | 100.0                          | 1.4                     | 0.0               | 0.0         |
| Brazilian registries               | 2000-2012       | 147                | 0.7              | 0.0        | 0.0        | 146               | 1.4          | 0.7        | 143               | 100.0                          | 0.7                     | 0.0               | 0.0         |
| Aracaju                            | 2000-2012       | 30                 | 0.0              | 0.0        | 0.0        | 30                | 3.3          | 0.0        | 29                | 100.0                          | 3.4                     | 0.0               | 0.0         |
| Cuiabá                             | -               | -                  | -                | -          | -          | -                 | -            | -          | -                 | -                              | -                       | -                 | -           |
| Curitiba                           | 2000-2012       | 101                | 0.0              | 0.0        | 0.0        | 101               | 1.0          | 1.0        | 99                | 100.0                          | 0.0                     | 0.0               | 0.0         |
| Goiânia                            | -               | -                  | -                | -          | -          | -                 | -            | -          | -                 | -                              | -                       | -                 | -           |
| Jaú                                | 2001-2012       | 16                 | 6.3              | 0.0        | 0.0        | 15                | 0.0          | 0.0        | 15                | 100.0                          | 0.0                     | 0.0               | 0.0         |
| São Paulo                          | -               | -                  | -                | -          | -          | -                 | -            | -          | -                 | -                              | -                       | -                 | -           |
| Chilean registries                 | 2000-2012       | 69                 | 0.0              | 0.0        | 2.9        | 67                | 0.0          | 0.0        | 67                | 98.5                           | 1.5                     | 0.0               | 14.9        |
| Antofagasta                        | 2004-2010       | 20                 | 0.0              | 0.0        | 10.0       | 18                | 0.0          | 0.0        | 18                | 100.0                          | 0.0                     | 0.0               | 5.6         |
| Biobio                             | 2003-2011       | 9                  | 0.0              | 0.0        | 0.0        | 9                 | 0.0          | 0.0        | 9                 | 100.0                          | 0.0                     | 0.0               | 11.1        |
| Concepción                         | 2006-2010       | 25                 | 0.0              | 0.0        | 0.0        | 25                | 0.0          | 0.0        | 25                | 96.0                           | 4.0                     | 0.0               | 32.0        |
| Los Rios                           | 2000-2012       | 15                 | 0.0              | 0.0        | 0.0        | 15                | 0.0          | 0.0        | 15                | 100.0                          | 0.0                     | 0.0               | 0.0         |
| Colombian registries               | 2000-2012       | 145                | 3.4              | 0.0        | 2.1        | 137               | 0.0          | 0.0        | 137               | 99.3                           | 2.9                     | 0.0               | 25.5        |
| Bucaramanga                        | -               | -                  | -                | -          | -          | -                 | -            | -          | -                 | -                              | -                       | -                 | -           |
| Cali                               | 2000-2008       | 106                | 0.0              | 0.0        | 0.0        | 106               | 0.0          | 0.0        | 106               | 99.1                           | 3.8                     | 0.0               | 26.4        |
| Manizales                          | 2003-2012       | 19                 | 10.5             | 0.0        | 10.5       | 15                | 0.0          | 0.0        | 15                | 100.0                          | 0.0                     | 0.0               | 40.0        |
| Pasto                              | 2000-2011       | 20                 | 15.0             | 0.0        | 5.0        | 16                | 0.0          | 0.0        | 16                | 100.0                          | 0.0                     | 0.0               | 6.3         |
| Costa Rica *                       | 2003-2014       | 105                | 0.0              | 0.0        | 0.0        | 105               | 1.0          | 1.0        | 103               | 98.1                           | 3.9                     | 0.0               | 0.0         |
| Cuba *                             | 2000-2012       | 572                | 0.0              | 0.0        | 0.0        | 572               | 0.9          | 0.7        | 563               | 100.0                          | 3.2                     | 59.1              | 0.0         |
| Ecuadorian registries              | 2000-2013       | 391                | 9.5              | 0.0        | 0.0        | 354               | 1.1          | 2.8        | 340               | 98.2                           | 7.1                     | 2.1               | 7.1         |
| Cuenca                             | 2000-2012       | 23                 | 26.1             | 0.0        | 0.0        | 17                | 0.0          | 5.9        | 16                | 100.0                          | 6.3                     | 0.0               | 18.8        |
| Guayaquil                          | 2005-2013       | 133                | 0.0              | 0.0        | 0.0        | 133               | 0.0          | 6.8        | 124               | 99.2                           | 4.0                     | 0.0               | 0.0         |
| Loja                               | 2000-2013       | 21                 | 0.0              | 0.0        | 0.0        | 21                | 0.0          | 0.0        | 21                | 95.2                           | 4.8                     | 33.3              | 0.0         |
| Manabí                             | 2000-2013       | 79                 | 11.4             | 0.0        | 0.0        | 70                | 2.9          | 0.0        | 68                | 94.1                           | 13.2                    | 0.0               | 2.9         |
| Quito                              | 2000-2013       | 135                | 16.3             | 0.0        | 0.0        | 113               | 1.8          | 0.0        | 111               | 100.0                          | 7.2                     | 0.0               | 17.1        |
| Guadeloupe *                       | 2008-2013       | 6                  | 0.0              | 0.0        | 0.0        | 6                 | 0.0          | 0.0        | 6                 | 100.0                          | 0.0                     | 0.0               | 83.3        |
| Martinique *                       | 2000-2011       | 10                 | 0.0              | 0.0        | 0.0        | 10                | 0.0          | 0.0        | 10                | 100.0                          | 0.0                     | 0.0               | 10.0        |
| Mexico (Childhood) †               | 2008-2014       | 1,907              | 4.1              | 0.0        | 15.9       | 1,526             | 0.0          | 1.7        | 1,500             | 98.9                           | 21.2                    | 12.3              | 8.8         |
| Peru (Lima)                        | 2010-2012       | 117                | 0.0              | 0.0        | 0.0        | 117               | 4.3          | 0.0        | 112               | 92.9                           | 12.5                    | 0.0               | 21.4        |
| Puerto Rico *                      | 2000-2011       | 132                | 1.5              | 0.0        | 0.0        | 130               | 0.0          | 0.8        | 129               | 100.0                          | 0.8                     | 0.0               | 0.0         |
| Uruguay *                          | -               | -                  | -                | -          | -          | -                 | -            | -          | -                 | -                              | -                       | -                 | -           |
| <b>AMERICA (North)</b>             |                 | <b>13,610</b>      | <b>0.4</b>       | <b>0.0</b> | <b>0.4</b> | <b>13,495</b>     | <b>0.2</b>   | <b>0.2</b> | <b>13,440</b>     | <b>99.6</b>                    | <b>1.4</b>              | <b>3.2</b>        | <b>0.0</b>  |
| Canadian registries                | 2000-2014       | 1,187              | 0.3              | 0.0        | 3.4        | 1,144             | 0.3          | 0.2        | 1,139             | 98.4                           | 2.3                     | 0.0               | 0.0         |
| Alberta                            | 2000-2014       | 203                | 0.5              | 0.0        | 0.5        | 201               | 0.0          | 0.0        | 201               | 100.0                          | 0.5                     | 0.0               | 0.0         |
| British Columbia                   | 2000-2014       | 215                | 0.9              | 0.0        | 17.2       | 176               | 0.6          | 0.0        | 175               | 100.0                          | 0.0                     | 0.0               | 0.0         |
| Manitoba                           | 2000-2014       | 43                 | 0.0              | 0.0        | 0.0        | 43                | 0.0          | 0.0        | 43                | 100.0                          | 0.0                     | 0.0               | 0.0         |
| New Brunswick                      | 2001-2014       | 33                 | 0.0              | 0.0        | 0.0        | 33                | 3.0          | 0.0        | 32                | 100.0                          | 0.0                     | 0.0               | 0.0         |
| Newfoundland & Labrador            | 2002-2014       | 22                 | 0.0              | 0.0        | 0.0        | 22                | 0.0          | 0.0        | 22                | 100.0                          | 4.5                     | 0.0               | 0.0         |
| Nova Scotia                        | 2000-2014       | 33                 | 0.0              | 0.0        | 0.0        | 33                | 0.0          | 0.0        | 33                | 100.0                          | 3.0                     | 0.0               | 0.0         |
| Ontario                            | 2000-2014       | 578                | 0.0              | 0.0        | 0.0        | 578               | 0.2          | 0.3        | 575               | 96.9                           | 4.0                     | 0.0               | 0.0         |
| Prince Edward Island               | 2002-2012       | 8                  | 0.0              | 0.0        | 25.0       | 6                 | 0.0          | 0.0        | 6                 | 100.0                          | 0.0                     | 0.0               | 0.0         |
| Saskatchewan                       | 2000-2014       | 52                 | 0.0              | 0.0        | 0.0        | 52                | 0.0          | 0.0        | 52                | 100.0                          | 0.0                     | 0.0               | 0.0         |
| US registries                      | 2000-2014       | 12,423             | 0.4              | 0.0        | 0.2        | 12,351            | 0.2          | 0.2        | 12,301            | 99.7                           | 1.3                     | 3.5               | 0.0         |
| Alabama                            | 2000-2014       | 211                | 0.0              | 0.0        | 0.0        | 211               | 0.0          | 0.0        | 211               | 99.5                           | 1.4                     | 0.0               | 0.0         |
| Alaska                             | 2000-2013       | 47                 | 0.0              | 0.0        | 0.0        | 47                | 0.0          | 0.0        | 47                | 100.0                          | 0.0                     | 0.0               | 0.0         |
| Arkansas                           | 2000-2011       | 120                | 0.0              | 0.0        | 0.0        | 120               | 0.0          | 0.0        | 120               | 100.0                          | 0.8                     | 0.0               | 0.0         |
| California                         | 2000-2011       | 1,527              | 0.6              | 0.0        | 0.0        | 1,518             | 0.1          | 0.1        | 1,514             | 99.6                           | 0.7                     | 0.0               | 0.0         |
| Greater Bay Area                   | 2000-2014       | 363                | 0.6              | 0.0        | 0.0        | 361               | 0.0          | 0.0        | 361               | 100.0                          | 0.3                     | 18.0              | 0.0         |
| Greater California                 | 2000-2014       | 1,112              | 0.5              | 0.0        | 0.4        | 1,102             | 0.2          | 0.1        | 1,099             | 99.7                           | 0.6                     | 18.5              | 0.0         |
| Los Angeles                        | 2000-2014       | 506                | 0.4              | 0.0        | 0.2        | 503               | 0.2          | 0.2        | 501               | 99.4                           | 1.2                     | 38.9              | 0.0         |
| Colorado                           | 2000-2013       | 248                | 0.0              | 0.0        | 0.0        | 248               | 0.4          | 0.4        | 246               | 100.0                          | 0.8                     | 0.0               | 0.0         |
| Connecticut                        | 2000-2014       | 208                | 0.5              | 0.0        | 0.5        | 206               | 0.5          | 0.5        | 204               | 100.0                          | 0.5                     | 14.7              | 0.0         |
| Delaware                           | 2000-2014       | 66                 | 0.0              | 0.0        | 0.0        | 66                | 0.0          | 0.0        | 66                | 100.0                          | 0.0                     | 0.0               | 0.0         |
| Florida                            | 2000-2013       | 790                | 0.0              | 0.0        | 0.0        | 790               | 0.0          | 0.4        | 787               | 99.6                           | 2.4                     | 0.0               | 0.0         |
| Georgia                            | 2000-2014       | 499                | 0.0              | 0.0        | 0.0        | 499               | 0.0          | 0.0        | 499               | 99.8                           | 1.0                     | 0.0               | 0.0         |
| Atlanta                            | 2000-2014       | 193                | 0.0              | 0.0        | 0.0        | 193               | 0.0          | 0.0        | 193               | 99.5                           | 1.6                     | 0.0               | 0.0         |
| Hawaii                             | 2000-2014       | 69                 | 1.4              | 0.0        | 0.0        | 68                | 0.0          | 0.0        | 68                | 100.0                          | 1.5                     | 29.4              | 0.0         |
| Idaho                              | 2000-2014       | 81                 | 1.2              | 0.0        | 0.0        | 80                | 0.0          | 1.3        | 79                | 100.0                          | 0.0                     | 0.0               | 0.0         |
| Indiana                            | 2000-2014       | 345                | 0.9              | 0.0        | 0.0        | 342               | 0.3          | 0.3        | 340               | 100.0                          | 0.9                     | 0.0               | 0.0         |
| Iowa                               | 2000-2014       | 164                | 0.6              | 0.0        | 0.6        | 162               | 0.6          | 0.0        | 161               | 100.0                          | 0.0                     | 5.0               | 0.0         |
| Kentucky                           | 2000-2014       | 219                | 0.0              | 0.0        | 0.0        | 219               | 0.0          | 0.0        | 219               | 100.0                          | 0.5                     | 14.2              | 0.0         |
| Louisiana                          | 2000-2014       | 197                | 0.0              | 0.0        | 1.5        | 194               | 0.0          | 0.0        | 194               | 99.5                           | 3.1                     | 29.9              | 0.0         |
| Maine                              | 2000-2013       | 59                 | 0.0              | 0.0        | 0.0        | 59                | 1.7          | 0.0        | 58                | 100.0                          | 3.4                     | 0.0               | 0.0         |
| Massachusetts                      | 2000-2009       | 230                | 0.0              | 0.0        | 0.4        | 229               | 0.0          | 0.0        | 229               | 100.0                          | 0.0                     | 0.0               | 0.0         |
| Michigan                           | 2000-2013       | 516                | 0.4              | 0.0        | 0.2        | 513               | 0.2          | 0.0        | 512               | 99.4                           | 4.7                     | 0.0               | 0.0         |

Web-table 2.18: Data quality indicators, children diagnosed during 2000-2014, by continent, country and registry: LYMPHOMAS (CHILDREN)

|                     | Calendar period | Patients submitted | Ineligible (%) ¶ |            |            | Excluded (%) ¶¶   |            |            | Data quality indicators (%) †† |             |                         |                   |            |
|---------------------|-----------------|--------------------|------------------|------------|------------|-------------------|------------|------------|--------------------------------|-------------|-------------------------|-------------------|------------|
|                     |                 |                    | Incomplete dates | In situ    | Other      | Eligible patients | DCO        | Other      | Patients included              | MV          | Non-specific morphology | Lost to follow-up | Censored   |
| Detroit             | 2000-2014       | 227                | 0.9              | 0.0        | 0.9        | 223               | 0.0        | 0.0        | 223                            | 100.0       | 2.2                     | 7.6               | 0.0        |
| Minnesota           | 2000-2013       | 291                | 0.0              | 0.0        | 0.0        | 291               | 0.0        | 0.0        | 291                            | 100.0       | 0.3                     | 0.0               | 0.3        |
| Mississippi         | 2002-2014       | 119                | 0.0              | 0.0        | 0.0        | 119               | 0.0        | 0.0        | 119                            | 100.0       | 0.8                     | 0.0               | 0.0        |
| Missouri            | -               | -                  | -                | -          | -          | -                 | -          | -          | -                              | -           | -                       | -                 | -          |
| Montana             | 2000-2014       | 45                 | 2.2              | 0.0        | 0.0        | 44                | 2.3        | 0.0        | 43                             | 100.0       | 0.0                     | 0.0               | 0.0        |
| Nebraska            | 2000-2014       | 112                | 0.0              | 0.0        | 0.9        | 111               | 0.0        | 0.9        | 110                            | 100.0       | 0.0                     | 0.0               | 0.0        |
| New Hampshire       | 2000-2014       | 82                 | 2.4              | 0.0        | 0.0        | 80                | 0.0        | 0.0        | 80                             | 100.0       | 0.0                     | 0.0               | 0.0        |
| New Jersey          | 2000-2014       | 504                | 0.2              | 0.0        | 0.4        | 501               | 0.2        | 0.0        | 500                            | 99.8        | 1.0                     | 46.6              | 0.0        |
| New Mexico          | 2000-2014       | 95                 | 0.0              | 0.0        | 1.1        | 94                | 0.0        | 0.0        | 94                             | 100.0       | 1.1                     | 24.5              | 1.1        |
| New York            | 2000-2014       | 1,109              | 1.2              | 0.0        | 0.0        | 1,096             | 0.2        | 0.2        | 1,092                          | 99.7        | 1.1                     | 0.0               | 0.0        |
| New York City       | 2000-2014       | 482                | 1.5              | 0.0        | 0.0        | 475               | 0.0        | 0.0        | 475                            | 99.8        | 1.5                     | 0.0               | 0.0        |
| North Carolina      | 2000-2014       | 434                | 0.0              | 0.0        | 0.5        | 432               | 0.2        | 0.2        | 430                            | 100.0       | 0.2                     | 0.0               | 0.0        |
| Ohio                | 2000-2014       | 545                | 0.0              | 0.0        | 0.0        | 545               | 0.2        | 0.2        | 543                            | 99.8        | 1.1                     | 0.0               | 0.0        |
| Oklahoma            | 2000-2010       | 131                | 0.0              | 0.0        | 0.0        | 131               | 0.0        | 0.0        | 131                            | 100.0       | 3.1                     | 0.0               | 0.0        |
| Oregon              | 2000-2013       | 186                | 0.0              | 0.0        | 0.0        | 186               | 0.0        | 0.0        | 186                            | 100.0       | 0.0                     | 0.0               | 0.0        |
| Pennsylvania        | 2000-2014       | 579                | 0.5              | 0.0        | 0.0        | 576               | 0.7        | 0.5        | 569                            | 99.8        | 0.5                     | 0.0               | 0.0        |
| Rhode Island        | 2000-2014       | 54                 | 0.0              | 0.0        | 0.0        | 54                | 0.0        | 0.0        | 54                             | 100.0       | 0.0                     | 0.0               | 0.0        |
| South Carolina      | 2000-2014       | 218                | 0.0              | 0.0        | 0.0        | 218               | 0.0        | 0.0        | 218                            | 100.0       | 1.8                     | 0.0               | 0.0        |
| Tennessee           | 2000-2011       | 221                | 0.0              | 0.0        | 0.5        | 220               | 0.0        | 0.0        | 220                            | 99.1        | 1.8                     | 0.0               | 0.0        |
| Texas               | 2000-2013       | 1,418              | 0.8              | 0.0        | 0.4        | 1,401             | 0.5        | 0.4        | 1,389                          | 99.1        | 2.4                     | 0.0               | 0.0        |
| Utah                | 2000-2014       | 159                | 0.0              | 0.0        | 0.6        | 158               | 0.0        | 0.0        | 158                            | 100.0       | 0.0                     | 13.9              | 0.6        |
| Vermont             | 2000-2013       | 29                 | 0.0              | 0.0        | 0.0        | 29                | 0.0        | 0.0        | 29                             | 100.0       | 0.0                     | 0.0               | 0.0        |
| Washington          | 2000-2008       | 182                | 1.1              | 0.0        | 0.0        | 180               | 0.0        | 0.0        | 180                            | 99.4        | 0.6                     | 0.0               | 0.0        |
| Seattle             | 2000-2014       | 231                | 0.4              | 0.0        | 0.0        | 230               | 0.0        | 0.0        | 230                            | 100.0       | 0.0                     | 17.8              | 0.0        |
| West Virginia       | 2000-2014       | 70                 | 0.0              | 0.0        | 0.0        | 70                | 0.0        | 0.0        | 70                             | 100.0       | 0.0                     | 0.0               | 0.0        |
| Wisconsin           | 2000-2013       | 225                | 0.0              | 0.0        | 0.0        | 225               | 0.9        | 0.4        | 222                            | 100.0       | 1.4                     | 0.0               | 0.0        |
| Wyoming             | 2000-2012       | 19                 | 0.0              | 0.0        | 0.0        | 19                | 0.0        | 0.0        | 19                             | 100.0       | 5.3                     | 0.0               | 0.0        |
| <b>ASIA</b>         |                 | <b>6,676</b>       | <b>0.3</b>       | <b>0.0</b> | <b>3.1</b> | <b>6,446</b>      | <b>0.2</b> | <b>0.8</b> | <b>6,380</b>                   | <b>99.1</b> | <b>5.0</b>              | <b>0.6</b>        | <b>2.1</b> |
| Chinese registries  | 2003-2013       | 215                | 0.0              | 0.0        | 0.5        | 214               | 0.5        | 0.0        | 213                            | 98.1        | 27.7                    | 5.2               | 0.5        |
| Beijing             | 2003-2013       | 64                 | 0.0              | 0.0        | 1.6        | 63                | 0.0        | 0.0        | 63                             | 100.0       | 3.2                     | 14.3              | 1.6        |
| Changle             | 2007-2011       | 3                  | 0.0              | 0.0        | 0.0        | 3                 | 0.0        | 0.0        | 3                              | 100.0       | 66.7                    | 0.0               | 0.0        |
| Cixian              | 2003-2013       | 13                 | 0.0              | 0.0        | 0.0        | 13                | 0.0        | 0.0        | 13                             | 92.3        | 23.1                    | 0.0               | 0.0        |
| Dafeng              | -               | -                  | -                | -          | -          | -                 | -          | -          | -                              | -           | -                       | -                 | -          |
| Dalian              | 2003-2013       | 25                 | 0.0              | 0.0        | 0.0        | 25                | 0.0        | 0.0        | 25                             | 100.0       | 12.0                    | 0.0               | 0.0        |
| Donghai             | 2007-2013       | 8                  | 0.0              | 0.0        | 0.0        | 8                 | 12.5       | 0.0        | 7                              | 85.7        | 85.7                    | 0.0               | 0.0        |
| Feicheng            | 2003-2006       | 3                  | 0.0              | 0.0        | 0.0        | 3                 | 0.0        | 0.0        | 3                              | 100.0       | 33.3                    | 0.0               | 0.0        |
| Ganyu               | 2004-2012       | 8                  | 0.0              | 0.0        | 0.0        | 8                 | 0.0        | 0.0        | 8                              | 100.0       | 37.5                    | 0.0               | 0.0        |
| Guanyun             | 2005-2013       | 9                  | 0.0              | 0.0        | 0.0        | 9                 | 0.0        | 0.0        | 9                              | 100.0       | 77.8                    | 0.0               | 0.0        |
| Haimen              | 2003-2013       | 11                 | 0.0              | 0.0        | 0.0        | 11                | 0.0        | 0.0        | 11                             | 81.8        | 63.6                    | 0.0               | 0.0        |
| Haining             | 2004-2013       | 4                  | 0.0              | 0.0        | 0.0        | 4                 | 0.0        | 0.0        | 4                              | 100.0       | 50.0                    | 0.0               | 0.0        |
| Jianhu              | 2003-2013       | 9                  | 0.0              | 0.0        | 0.0        | 9                 | 0.0        | 0.0        | 9                              | 100.0       | 100.0                   | 11.1              | 0.0        |
| Jiashan             | 2003-2009       | 3                  | 0.0              | 0.0        | 0.0        | 3                 | 0.0        | 0.0        | 3                              | 100.0       | 33.3                    | 0.0               | 0.0        |
| Jintan              | -               | -                  | -                | -          | -          | -                 | -          | -          | -                              | -           | -                       | -                 | -          |
| Lianyungang         | 2009-2011       | 5                  | 0.0              | 0.0        | 0.0        | 5                 | 0.0        | 0.0        | 5                              | 100.0       | 80.0                    | 20.0              | 0.0        |
| Linzhou             | 2003-2012       | 8                  | 0.0              | 0.0        | 0.0        | 8                 | 0.0        | 0.0        | 8                              | 100.0       | 37.5                    | 0.0               | 0.0        |
| Qidong              | 2003-2008       | 6                  | 0.0              | 0.0        | 0.0        | 6                 | 0.0        | 0.0        | 6                              | 100.0       | 50.0                    | 0.0               | 0.0        |
| Sihui               | 2006-2012       | 5                  | 0.0              | 0.0        | 0.0        | 5                 | 0.0        | 0.0        | 5                              | 100.0       | 0.0                     | 0.0               | 0.0        |
| Taixing             | 2013-2013       | 1                  | 0.0              | 0.0        | 0.0        | 1                 | 0.0        | 0.0        | 1                              | 100.0       | 0.0                     | 0.0               | 0.0        |
| Yangzhong           | 2006-2006       | 1                  | 0.0              | 0.0        | 0.0        | 1                 | 0.0        | 0.0        | 1                              | 100.0       | 0.0                     | 0.0               | 0.0        |
| Zhongshan           | 2003-2013       | 29                 | 0.0              | 0.0        | 0.0        | 29                | 0.0        | 0.0        | 29                             | 100.0       | 10.3                    | 0.0               | 0.0        |
| Cyprus *            | 2004-2013       | 40                 | 0.0              | 0.0        | 0.0        | 40                | 2.5        | 0.0        | 39                             | 100.0       | 0.0                     | 0.0               | 61.5       |
| Hong Kong *         | -               | -                  | -                | -          | -          | -                 | -          | -          | -                              | -           | -                       | -                 | -          |
| Indian registries   | 2005-2014       | 12                 | 0.0              | 0.0        | 0.0        | 12                | 0.0        | 0.0        | 12                             | 100.0       | 0.0                     | 8.3               | 0.0        |
| Guwahati            | -               | -                  | -                | -          | -          | -                 | -          | -          | -                              | -           | -                       | -                 | -          |
| Karunagappally      | 2005-2014       | 12                 | 0.0              | 0.0        | 0.0        | 12                | 0.0        | 0.0        | 12                             | 100.0       | 0.0                     | 8.3               | 0.0        |
| Iran (Golestan)     | -               | -                  | -                | -          | -          | -                 | -          | -          | -                              | -           | -                       | -                 | -          |
| Israel *            | 2000-2013       | 864                | 0.0              | 0.0        | 11.8       | 762               | 0.4        | 0.1        | 758                            | 99.9        | 1.3                     | 0.0               | 0.0        |
| Japanese registries | 2000-2013       | 528                | 0.9              | 0.0        | 1.5        | 515               | 1.4        | 0.0        | 508                            | 97.8        | 8.1                     | 0.0               | 3.0        |
| Aichi               | 2003-2013       | 91                 | 0.0              | 0.0        | 1.1        | 90                | 0.0        | 0.0        | 90                             | 98.9        | 3.3                     | 0.0               | 6.7        |
| Akita               | -               | -                  | -                | -          | -          | -                 | -          | -          | -                              | -           | -                       | -                 | -          |
| Ehime               | 2008-2013       | 16                 | 0.0              | 0.0        | 18.8       | 13                | 7.7        | 0.0        | 12                             | 100.0       | 0.0                     | 0.0               | 0.0        |
| Fukui               | 2003-2009       | 10                 | 0.0              | 0.0        | 0.0        | 10                | 0.0        | 0.0        | 10                             | 100.0       | 10.0                    | 0.0               | 0.0        |
| Gunma               | 2007-2010       | 14                 | 35.7             | 0.0        | 0.0        | 9                 | 22.2       | 0.0        | 7                              | 100.0       | 28.6                    | 0.0               | 0.0        |
| Hiroshima           | 2004-2008       | 23                 | 0.0              | 0.0        | 0.0        | 23                | 0.0        | 0.0        | 23                             | 95.7        | 4.3                     | 0.0               | 4.3        |
| Hyogo               | 2007-2012       | 23                 | 0.0              | 0.0        | 4.3        | 22                | 0.0        | 0.0        | 22                             | 100.0       | 0.0                     | 0.0               | 0.0        |
| Ibaraki             | 2006-2012       | 17                 | 0.0              | 0.0        | 0.0        | 17                | 0.0        | 0.0        | 17                             | 100.0       | 0.0                     | 0.0               | 5.9        |
| Kanagawa            | 2000-2013       | 62                 | 0.0              | 0.0        | 0.0        | 62                | 1.6        | 0.0        | 61                             | 100.0       | 18.0                    | 0.0               | 0.0        |
| Miyagi              | 2001-2010       | 22                 | 0.0              | 0.0        | 0.0        | 22                | 0.0        | 0.0        | 22                             | 100.0       | 0.0                     | 0.0               | 4.5        |
| Niigata             | 2000-2013       | 50                 | 0.0              | 0.0        | 0.0        | 50                | 0.0        | 0.0        | 50                             | 100.0       | 2.0                     | 0.0               | 0.0        |
| Osaka               | 2000-2008       | 143                | 0.0              | 0.0        | 1.4        | 141               | 1.4        | 0.0        | 139                            | 93.5        | 15.1                    | 0.0               | 3.6        |
| Saga                | 2006-2012       | 12                 | 0.0              | 0.0        | 0.0        | 12                | 0.0        | 0.0        | 12                             | 100.0       | 0.0                     | 0.0               | 0.0        |
| Tochigi             | 2006-2013       | 20                 | 0.0              | 0.0        | 5.0        | 19                | 0.0        | 0.0        | 19                             | 100.0       | 5.3                     | 0.0               | 0.0        |
| Yamagata            | 2003-2013       | 22                 | 0.0              | 0.0        | 0.0        | 22                | 4.5        | 0.0        | 21                             | 100.0       | 0.0                     | 0.0               | 4.8        |
| Yamanashi           | 2009-2012       | 3                  | 0.0              | 0.0        | 0.0        | 3                 | 0.0        | 0.0        | 3                              | 100.0       | 0.0                     | 0.0               | 0.0        |
| Jordan *            | 2000-2014       | 486                | 0.0              | 0.0        | 0.0        | 486               | 0.0        | 1.2        | 480                            | 100.0       | 1.5                     | 2.9               | 0.0        |
| Korea * ‡           | 2000-2014       | 2,058              | 0.4              | 0.0        | 0.0        | 2,049             | 0.0        | 0.0        | 2,049                          | 98.2        | 5.6                     | 0.0               | 0.0        |
| Kuwait *            | 2000-2013       | 146                | 0.0              | 0.0        | 11.6       | 129               | 0.0        | 0.0        | 129                            | 100.0       | 1.6                     | 4.7               | 0.0        |
| Malaysia (Penang)   | 2000-2012       | 68                 | 2.9              | 0.0        | 0.0        | 66                | 0.0        | 1.5        | 65                             | 98.5        | 15.4                    | 0.0               | 33.8       |
| Mongolia *          | -               | -                  | -                | -          | -          | -                 | -          | -          | -                              | -           | -                       | -                 | -          |
| Qatar *             | 2000-2014       | 74                 | 0.0              | 0.0        | 2.7        | 72                | 1.4        | 0.0        | 71                             | 100.0       | 2.8                     | 0.0               | 45.1       |
| Singapore *         | 2000-2014       | 187                | 0.0              | 0.0        | 10.7       | 167               | 0.0        | 0.0        | 167                            | 100.0       | 0.6                     | 0.0               | 0.0        |
| Taiwan *            | 2000-2014       | 832                | 0.0              | 0.0        | 0.0        | 832               | 0.0        | 0.0        | 832                            | 100.0       | 1.6                     | 0.0               | 0.0        |

Web-table 2.18: Data quality indicators, children diagnosed during 2000-2014, by continent, country and registry: LYMPHOMAS (CHILDREN)

|                                | Calendar period | Patients submitted | Ineligible (%) ¶ |            |            | Eligible patients | Excluded (%) ¶¶ |            | Patients included | Data quality indicators (%) ¶¶ |                         |                   |            |
|--------------------------------|-----------------|--------------------|------------------|------------|------------|-------------------|-----------------|------------|-------------------|--------------------------------|-------------------------|-------------------|------------|
|                                |                 |                    | Incomplete dates | In situ    | Other      |                   | DCO             | Other      |                   | MV                             | Non-specific morphology | Lost to follow-up | Censored   |
| Thai registries                | 2000-2014       | 256                | 0.0              | 0.0        | 0.8        | 254               | 0.4             | 14.2       | 217               | 100.0                          | 16.6                    | 0.0               | 5.1        |
| Bangkok                        | 2001-2012       | 128                | 0.0              | 0.0        | 0.8        | 127               | 0.0             | 28.3       | 91                | 100.0                          | 19.8                    | 0.0               | 0.0        |
| Khon Kaen                      | 2000-2012       | 16                 | 0.0              | 0.0        | 0.0        | 16                | 0.0             | 0.0        | 16                | 100.0                          | 12.5                    | 0.0               | 25.0       |
| Lampang                        | 2001-2014       | 26                 | 0.0              | 0.0        | 3.8        | 25                | 4.0             | 0.0        | 24                | 100.0                          | 16.7                    | 0.0               | 0.0        |
| Lamphun                        | 2000-2014       | 17                 | 0.0              | 0.0        | 0.0        | 17                | 0.0             | 0.0        | 17                | 100.0                          | 17.6                    | 0.0               | 0.0        |
| Lopburi                        | 2001-2013       | 21                 | 0.0              | 0.0        | 0.0        | 21                | 0.0             | 0.0        | 21                | 100.0                          | 38.1                    | 0.0               | 33.3       |
| Songkhla                       | 2000-2014       | 48                 | 0.0              | 0.0        | 0.0        | 48                | 0.0             | 0.0        | 48                | 100.0                          | 2.1                     | 0.0               | 0.0        |
| Turkish registries             | 2000-2013       | 910                | 0.7              | 0.0        | 6.2        | 848               | 0.0             | 0.9        | 840               | 99.4                           | 3.0                     | 0.5               | 3.0        |
| Ankara                         | 2008-2012       | 378                | 0.0              | 0.0        | 1.3        | 373               | 0.0             | 0.5        | 371               | 100.0                          | 3.2                     | 0.0               | 3.2        |
| Antalya                        | 2006-2012       | 59                 | 0.0              | 0.0        | 6.8        | 55                | 0.0             | 0.0        | 55                | 100.0                          | 1.8                     | 0.0               | 0.0        |
| Bursa                          | 2006-2012       | 112                | 1.8              | 0.0        | 36.6       | 69                | 0.0             | 0.0        | 69                | 98.6                           | 5.8                     | 0.0               | 0.0        |
| Edirne                         | 2007-2012       | 5                  | 0.0              | 0.0        | 0.0        | 5                 | 0.0             | 0.0        | 5                 | 100.0                          | 0.0                     | 0.0               | 0.0        |
| Erzurum                        | 2006-2012       | 45                 | 0.0              | 0.0        | 0.0        | 45                | 0.0             | 4.4        | 43                | 97.7                           | 9.3                     | 0.0               | 2.3        |
| Eskisehir                      | -               | -                  | -                | -          | -          | -                 | -               | -          | -                 | -                              | -                       | -                 | -          |
| Izmir                          | 2000-2013       | 249                | 1.6              | 0.0        | 1.2        | 242               | 0.0             | 1.7        | 238               | 98.7                           | 1.3                     | 0.0               | 5.0        |
| Samsun                         | 2006-2012       | 34                 | 0.0              | 0.0        | 0.0        | 34                | 0.0             | 0.0        | 34                | 100.0                          | 2.9                     | 11.8              | 0.0        |
| Trabzon                        | 2006-2012       | 28                 | 0.0              | 0.0        | 10.7       | 25                | 0.0             | 0.0        | 25                | 100.0                          | 0.0                     | 0.0               | 0.0        |
| <b>EUROPE</b>                  |                 | <b>15,988</b>      | <b>0.1</b>       | <b>0.0</b> | <b>6.6</b> | <b>14,917</b>     | <b>0.2</b>      | <b>0.4</b> | <b>14,830</b>     | <b>99.8</b>                    | <b>1.5</b>              | <b>1.6</b>        | <b>4.7</b> |
| Austria *                      | -               | -                  | -                | -          | -          | -                 | -               | -          | -                 | -                              | -                       | -                 | -          |
| Belarus (Childhood) †          | 2000-2014       | 372                | 0.0              | 0.0        | 0.0        | 372               | 0.8             | 0.5        | 367               | 100.0                          | 0.0                     | 1.9               | 0.0        |
| Belgium *                      | 2004-2014       | 550                | 0.0              | 0.0        | 0.0        | 550               | 0.0             | 0.2        | 549               | 99.6                           | 0.9                     | 2.7               | 0.0        |
| Bulgaria *                     | 2000-2014       | 304                | 0.0              | 0.0        | 0.0        | 304               | 2.0             | 0.0        | 298               | 100.0                          | 1.3                     | 0.3               | 0.0        |
| Croatia *                      | 2000-2014       | 238                | 0.0              | 0.0        | 2.5        | 232               | 0.0             | 0.4        | 231               | 100.0                          | 0.9                     | 0.0               | 0.0        |
| Czech Republic *               | 2000-2014       | 304                | 0.0              | 0.0        | 7.6        | 281               | 0.0             | 0.7        | 279               | 100.0                          | 0.7                     | 0.0               | 0.0        |
| Denmark *                      | 2000-2014       | 234                | 0.0              | 0.0        | 0.4        | 233               | 0.0             | 0.0        | 233               | 100.0                          | 2.6                     | 0.4               | 0.0        |
| Estonia *                      | 2000-2012       | 47                 | 0.0              | 0.0        | 0.0        | 47                | 0.0             | 0.0        | 47                | 100.0                          | 0.0                     | 2.1               | 0.0        |
| Finland *                      | 2000-2014       | 244                | 0.0              | 0.0        | 0.0        | 244               | 0.8             | 0.4        | 241               | 100.0                          | 0.4                     | 0.8               | 0.0        |
| French registries              | 2000-2012       | 2,829              | 0.0              | 0.0        | 9.0        | 2,574             | 0.0             | 0.0        | 2,573             | 100.0                          | 0.1                     | 0.0               | 3.5        |
| Bas-Rhin                       | -               | -                  | -                | -          | -          | -                 | -               | -          | -                 | -                              | -                       | -                 | -          |
| Basse Normandie                | -               | -                  | -                | -          | -          | -                 | -               | -          | -                 | -                              | -                       | -                 | -          |
| Burgundy Digestive             | -               | -                  | -                | -          | -          | -                 | -               | -          | -                 | -                              | -                       | -                 | -          |
| Calvados                       | -               | -                  | -                | -          | -          | -                 | -               | -          | -                 | -                              | -                       | -                 | -          |
| Calvados Digestive             | -               | -                  | -                | -          | -          | -                 | -               | -          | -                 | -                              | -                       | -                 | -          |
| Côte-d'Or Gynaecologic         | -               | -                  | -                | -          | -          | -                 | -               | -          | -                 | -                              | -                       | -                 | -          |
| Côte-d'Or Haematopoietic       | -               | -                  | -                | -          | -          | -                 | -               | -          | -                 | -                              | -                       | -                 | -          |
| Doubs                          | -               | -                  | -                | -          | -          | -                 | -               | -          | -                 | -                              | -                       | -                 | -          |
| Finistère                      | -               | -                  | -                | -          | -          | -                 | -               | -          | -                 | -                              | -                       | -                 | -          |
| Gironde CNS                    | -               | -                  | -                | -          | -          | -                 | -               | -          | -                 | -                              | -                       | -                 | -          |
| Gironde General                | -               | -                  | -                | -          | -          | -                 | -               | -          | -                 | -                              | -                       | -                 | -          |
| Gironde Haematopoietic         | -               | -                  | -                | -          | -          | -                 | -               | -          | -                 | -                              | -                       | -                 | -          |
| Haut-Rhin                      | -               | -                  | -                | -          | -          | -                 | -               | -          | -                 | -                              | -                       | -                 | -          |
| Haute-Vienne                   | -               | -                  | -                | -          | -          | -                 | -               | -          | -                 | -                              | -                       | -                 | -          |
| Hérault                        | -               | -                  | -                | -          | -          | -                 | -               | -          | -                 | -                              | -                       | -                 | -          |
| Isère                          | -               | -                  | -                | -          | -          | -                 | -               | -          | -                 | -                              | -                       | -                 | -          |
| Lille Metro                    | -               | -                  | -                | -          | -          | -                 | -               | -          | -                 | -                              | -                       | -                 | -          |
| Loire-Atlantique               | -               | -                  | -                | -          | -          | -                 | -               | -          | -                 | -                              | -                       | -                 | -          |
| Manche                         | -               | -                  | -                | -          | -          | -                 | -               | -          | -                 | -                              | -                       | -                 | -          |
| Somme                          | -               | -                  | -                | -          | -          | -                 | -               | -          | -                 | -                              | -                       | -                 | -          |
| Tarn                           | -               | -                  | -                | -          | -          | -                 | -               | -          | -                 | -                              | -                       | -                 | -          |
| France Childhood Haem †        | 2000-2012       | 2,829              | 0.0              | 0.0        | 9.0        | 2,574             | 0.0             | 0.0        | 2,573             | 100.0                          | 0.1                     | 0.0               | 3.5        |
| France Childhood Solid †       | -               | -                  | -                | -          | -          | -                 | -               | -          | -                 | -                              | -                       | -                 | -          |
| German registries              | 2000-2013       | 557                | 0.0              | 0.0        | 19.7       | 447               | 0.0             | 0.2        | 446               | 100.0                          | 1.3                     | 1.1               | 28.3       |
| Brandenburg                    | -               | -                  | -                | -          | -          | -                 | -               | -          | -                 | -                              | -                       | -                 | -          |
| Bremen                         | 2000-2012       | 17                 | 0.0              | 0.0        | 11.8       | 15                | 0.0             | 0.0        | 15                | 100.0                          | 0.0                     | 33.3              | 0.0        |
| Hamburg                        | -               | -                  | -                | -          | -          | -                 | -               | -          | -                 | -                              | -                       | -                 | -          |
| Lower Saxony                   | 2003-2013       | 337                | 0.0              | 0.0        | 28.8       | 240               | 0.0             | 0.4        | 239               | 100.0                          | 2.1                     | 0.0               | 37.2       |
| Mecklenburg-W. Pomerania       | -               | -                  | -                | -          | -          | -                 | -               | -          | -                 | -                              | -                       | -                 | -          |
| Rhineland Palatinate           | 2000-2013       | 158                | 0.0              | 0.0        | 4.4        | 151               | 0.0             | 0.0        | 151               | 100.0                          | 0.7                     | 0.0               | 24.5       |
| Saarland                       | 2004-2012       | 5                  | 0.0              | 0.0        | 0.0        | 5                 | 0.0             | 0.0        | 5                 | 100.0                          | 0.0                     | 0.0               | 0.0        |
| Saxony                         | -               | -                  | -                | -          | -          | -                 | -               | -          | -                 | -                              | -                       | -                 | -          |
| Schleswig-Holstein             | 2000-2012       | 40                 | 0.0              | 0.0        | 10.0       | 36                | 0.0             | 0.0        | 36                | 100.0                          | 0.0                     | 0.0               | 0.0        |
| Thuringia                      | -               | -                  | -                | -          | -          | -                 | -               | -          | -                 | -                              | -                       | -                 | -          |
| Gibraltar *                    | -               | -                  | -                | -          | -          | -                 | -               | -          | -                 | -                              | -                       | -                 | -          |
| Greece (National Paediatric) † | 2000-2014       | 405                | 2.0              | 0.0        | 0.0        | 397               | 0.0             | 0.0        | 397               | 100.0                          | 0.0                     | 0.5               | 0.3        |
| Iceland *                      | 2003-2013       | 11                 | 0.0              | 0.0        | 0.0        | 11                | 0.0             | 0.0        | 11                | 100.0                          | 0.0                     | 0.0               | 0.0        |
| Ireland *                      | 2000-2013       | 235                | 0.0              | 0.0        | 16.6       | 196               | 1.0             | 0.0        | 194               | 100.0                          | 4.1                     | 0.0               | 0.0        |
| Italian registries             | 2000-2014       | 1,307              | 0.0              | 0.0        | 2.5        | 1,274             | 0.0             | 0.1        | 1,273             | 98.7                           | 2.0                     | 1.5               | 1.6        |
| Alto Adige                     | 2000-2010       | 17                 | 0.0              | 0.0        | 0.0        | 17                | 0.0             | 0.0        | 17                | 100.0                          | 0.0                     | 0.0               | 0.0        |
| Barletta-Andria-Trani          | 2009-2012       | 7                  | 0.0              | 0.0        | 0.0        | 7                 | 0.0             | 0.0        | 7                 | 100.0                          | 0.0                     | 0.0               | 0.0        |
| Basilicata                     | 2006-2010       | 9                  | 0.0              | 0.0        | 0.0        | 9                 | 0.0             | 0.0        | 9                 | 88.9                           | 11.1                    | 0.0               | 0.0        |
| Bergamo                        | 2007-2012       | 30                 | 0.0              | 0.0        | 0.0        | 30                | 0.0             | 0.0        | 30                | 100.0                          | 0.0                     | 3.3               | 0.0        |
| Biella-Vercelli                | 2000-2007       | -                  | -                | -          | -          | -                 | -               | -          | -                 | -                              | -                       | -                 | -          |
| Brescia                        | 2000-2008       | 35                 | 0.0              | 0.0        | 0.0        | 35                | 0.0             | 0.0        | 35                | 100.0                          | 5.7                     | 2.9               | 0.0        |
| Brindisi                       | 2006-2008       | 7                  | 0.0              | 0.0        | 0.0        | 7                 | 0.0             | 0.0        | 7                 | 85.7                           | 14.3                    | 0.0               | 0.0        |
| Caserta                        | 2008-2010       | 18                 | 0.0              | 0.0        | 0.0        | 18                | 0.0             | 0.0        | 18                | 100.0                          | 0.0                     | 0.0               | 11.1       |
| Catania-Messina-Enna           | 2003-2012       | 68                 | 0.0              | 0.0        | 0.0        | 68                | 0.0             | 0.0        | 68                | 100.0                          | 1.5                     | 0.0               | 2.9        |
| Catanzaro                      | 2006-2009       | 4                  | 0.0              | 0.0        | 0.0        | 4                 | 0.0             | 0.0        | 4                 | 100.0                          | 0.0                     | 0.0               | 0.0        |
| Como                           | 2004-2011       | 17                 | 0.0              | 0.0        | 0.0        | 17                | 0.0             | 0.0        | 17                | 100.0                          | 0.0                     | 0.0               | 0.0        |
| Cremona                        | 2006-2007       | 2                  | 0.0              | 0.0        | 0.0        | 2                 | 0.0             | 0.0        | 2                 | 100.0                          | 0.0                     | 0.0               | 0.0        |
| Ferrara                        | 2001-2011       | 17                 | 0.0              | 0.0        | 0.0        | 17                | 0.0             | 0.0        | 17                | 100.0                          | 0.0                     | 0.0               | 0.0        |
| Friuli-Venezia-Giulia          | 2000-2010       | 50                 | 0.0              | 0.0        | 0.0        | 50                | 0.0             | 0.0        | 50                | 96.0                           | 4.0                     | 4.0               | 0.0        |
| Genoa                          | 2000-2009       | 30                 | 0.0              | 0.0        | 30.0       | 21                | 0.0             | 0.0        | 21                | 95.2                           | 4.8                     | 4.8               | 0.0        |
| Latina                         | 2000-2011       | 31                 | 0.0              | 0.0        | 0.0        | 31                | 0.0             | 0.0        | 31                | 100.0                          | 3.2                     | 6.5               | 3.2        |
| Lecce                          | 2003-2008       | 16                 | 0.0              | 0.0        | 0.0        | 16                | 0.0             | 0.0        | 16                | 100.0                          | 0.0                     | 0.0               | 0.0        |

Web-table 2.18: Data quality indicators, children diagnosed during 2000-2014, by continent, country and registry: LYMPHOMAS (CHILDREN)

|                      | Calendar period | Patients submitted | Ineligible (%) ¶ |         |       | Eligible patients | Excluded (%) ¶¶ |       | Patients included | Data quality indicators (%) †† |                         |                   |          |
|----------------------|-----------------|--------------------|------------------|---------|-------|-------------------|-----------------|-------|-------------------|--------------------------------|-------------------------|-------------------|----------|
|                      |                 |                    | Incomplete dates | In situ | Other |                   | DCO             | Other |                   | MV                             | Non-specific morphology | Lost to follow-up | Censored |
| Mantova              | 2000-2010       | 16                 | 0.0              | 0.0     | 0.0   | 16                | 0.0             | 0.0   | 16                | 93.8                           | 12.5                    | 0.0               | 0.0      |
| Milano               | 2000-2010       | 73                 | 0.0              | 0.0     | 0.0   | 73                | 0.0             | 0.0   | 73                | 98.6                           | 1.4                     | 2.7               | 0.0      |
| Modena               | 2000-2012       | 39                 | 0.0              | 0.0     | 17.9  | 32                | 0.0             | 0.0   | 32                | 96.9                           | 3.1                     | 0.0               | 0.0      |
| Monza-Brianza        | 2007-2012       | 14                 | 0.0              | 0.0     | 0.0   | 14                | 0.0             | 0.0   | 14                | 100.0                          | 0.0                     | 7.1               | 0.0      |
| Naples               | 2000-2012       | 50                 | 0.0              | 0.0     | 0.0   | 50                | 0.0             | 0.0   | 50                | 98.0                           | 2.0                     | 4.0               | 0.0      |
| Nuoro                | 2003-2012       | 16                 | 0.0              | 0.0     | 0.0   | 16                | 0.0             | 0.0   | 16                | 100.0                          | 0.0                     | 0.0               | 0.0      |
| Palermo              | 2003-2012       | 43                 | 0.0              | 0.0     | 2.3   | 42                | 0.0             | 0.0   | 42                | 97.6                           | 2.4                     | 0.0               | 0.0      |
| Parma                | 2000-2014       | 24                 | 0.0              | 0.0     | 20.8  | 19                | 0.0             | 0.0   | 19                | 100.0                          | 0.0                     | 5.3               | 0.0      |
| Pavia                | 2003-2007       | 13                 | 0.0              | 0.0     | 0.0   | 13                | 0.0             | 0.0   | 13                | 100.0                          | 0.0                     | 0.0               | 0.0      |
| Piacenza             | 2007-2011       | 5                  | 0.0              | 0.0     | 0.0   | 5                 | 0.0             | 0.0   | 5                 | 100.0                          | 0.0                     | 0.0               | 20.0     |
| Ragusa               | 2000-2012       | 27                 | 0.0              | 0.0     | 14.8  | 23                | 0.0             | 0.0   | 23                | 100.0                          | 4.3                     | 0.0               | 0.0      |
| Reggio Emilia        | 2001-2012       | 29                 | 0.0              | 0.0     | 0.0   | 29                | 0.0             | 0.0   | 29                | 100.0                          | 0.0                     | 6.9               | 0.0      |
| Romagna              | 2000-2012       | 61                 | 0.0              | 0.0     | 0.0   | 61                | 0.0             | 0.0   | 61                | 96.7                           | 3.3                     | 0.0               | 0.0      |
| Salerno              | 2000-2009       | 51                 | 0.0              | 0.0     | 0.0   | 51                | 0.0             | 0.0   | 51                | 98.0                           | 2.0                     | 0.0               | 15.7     |
| Sassari              | 2000-2011       | 21                 | 0.0              | 0.0     | 0.0   | 21                | 0.0             | 4.8   | 20                | 100.0                          | 0.0                     | 0.0               | 0.0      |
| Siracusa             | 2000-2011       | 15                 | 0.0              | 0.0     | 0.0   | 15                | 0.0             | 0.0   | 15                | 93.3                           | 6.7                     | 0.0               | 0.0      |
| Sondrio              | 2005-2011       | 5                  | 0.0              | 0.0     | 0.0   | 5                 | 0.0             | 0.0   | 5                 | 100.0                          | 0.0                     | 0.0               | 0.0      |
| Taranto              | 2006-2012       | 22                 | 0.0              | 0.0     | 0.0   | 22                | 0.0             | 0.0   | 22                | 100.0                          | 0.0                     | 0.0               | 0.0      |
| Trapani              | 2002-2010       | 17                 | 0.0              | 0.0     | 0.0   | 17                | 0.0             | 0.0   | 17                | 94.1                           | 5.9                     | 0.0               | 0.0      |
| Trento               | 2000-2010       | 13                 | 0.0              | 0.0     | 0.0   | 13                | 0.0             | 0.0   | 13                | 100.0                          | 0.0                     | 7.7               | 0.0      |
| Turin                | 2000-2012       |                    |                  |         |       |                   |                 |       |                   |                                |                         |                   |          |
| Tuscany              | 2000-2009       | 55                 | 0.0              | 0.0     | 12.7  | 48                | 0.0             | 0.0   | 48                | 97.9                           | 4.2                     | 0.0               | 10.4     |
| Umbria               | 2000-2013       | 40                 | 0.0              | 0.0     | 0.0   | 40                | 0.0             | 0.0   | 40                | 100.0                          | 5.0                     | 2.5               | 0.0      |
| Varese               | 2000-2012       | 53                 | 0.0              | 0.0     | 0.0   | 53                | 0.0             | 0.0   | 53                | 100.0                          | 0.0                     | 0.0               | 0.0      |
| Veneto               | 2000-2009       | 94                 | 0.0              | 0.0     | 0.0   | 94                | 0.0             | 0.0   | 94                | 100.0                          | 0.0                     | 2.1               | 1.1      |
| Viterbo              | 2006-2008       | 4                  | 0.0              | 0.0     | 0.0   | 4                 | 0.0             | 0.0   | 4                 | 100.0                          | 0.0                     | 0.0               | 0.0      |
| Piedmont Childhood   | 2000-2011       | 149                | 0.0              | 0.0     | 0.0   | 149               | 0.0             | 0.0   | 149               | 100.0                          | 0.0                     | 0.0               | 0.0      |
| Latvia *             | -               |                    |                  |         |       |                   |                 |       |                   |                                |                         |                   |          |
| Lithuania *          | 2000-2012       | 109                | 0.0              | 0.0     | 0.0   | 109               | 0.0             | 2.8   | 106               | 100.0                          | 0.9                     | 0.0               | 0.9      |
| Malta *              | 2001-2013       | 21                 | 0.0              | 0.0     | 4.8   | 20                | 0.0             | 0.0   | 20                | 100.0                          | 5.0                     | 0.0               | 0.0      |
| Netherlands *        | 2000-2014       | 764                | 0.0              | 0.0     | 0.5   | 760               | 0.4             | 0.3   | 755               | 100.0                          | 0.0                     | 1.3               | 0.0      |
| Norway *             | 2000-2014       | 356                | 0.0              | 0.0     | 27.8  | 257               | 0.4             | 0.4   | 255               | 100.0                          | 0.0                     | 0.8               | 0.0      |
| Poland *             | 2000-2014       | 1,332              | 0.0              | 0.0     | 0.0   | 1,332             | 0.0             | 1.8   | 1,308             | 100.0                          | 4.6                     | 0.0               | 0.0      |
| Greater Poland       | 2000-2014       | 155                | 0.0              | 0.0     | 0.0   | 155               | 0.0             | 0.6   | 154               | 100.0                          | 7.1                     | 0.0               | 0.0      |
| Holy Cross           | 2000-2014       | 54                 | 0.0              | 0.0     | 0.0   | 54                | 0.0             | 3.7   | 52                | 100.0                          | 3.8                     | 0.0               | 0.0      |
| Kujavia-Pomerania    | 2001-2014       | 82                 | 0.0              | 0.0     | 0.0   | 82                | 0.0             | 2.4   | 80                | 100.0                          | 0.0                     | 0.0               | 0.0      |
| Lesser Poland        | 2000-2014       | 142                | 0.0              | 0.0     | 0.0   | 142               | 0.0             | 0.7   | 141               | 100.0                          | 2.8                     | 0.0               | 0.0      |
| Łódź                 | 2000-2014       | 63                 | 0.0              | 0.0     | 0.0   | 63                | 0.0             | 22.2  | 49                | 100.0                          | 8.2                     | 0.0               | 0.0      |
| Lower Silesia        | 2000-2014       | 82                 | 0.0              | 0.0     | 0.0   | 82                | 0.0             | 0.0   | 82                | 100.0                          | 14.6                    | 0.0               | 0.0      |
| Lublin               | 2000-2014       | 80                 | 0.0              | 0.0     | 0.0   | 80                | 0.0             | 0.0   | 80                | 100.0                          | 5.0                     | 0.0               | 0.0      |
| Lubush               | 2000-2014       | 26                 | 0.0              | 0.0     | 0.0   | 26                | 0.0             | 0.0   | 26                | 100.0                          | 0.0                     | 0.0               | 0.0      |
| Mazovia              | 2000-2014       | 201                | 0.0              | 0.0     | 0.0   | 201               | 0.0             | 0.5   | 200               | 100.0                          | 3.0                     | 0.0               | 0.0      |
| Opole                | 2000-2014       | 22                 | 0.0              | 0.0     | 0.0   | 22                | 0.0             | 0.0   | 22                | 100.0                          | 4.5                     | 0.0               | 0.0      |
| Podlaha              | 2000-2014       | 35                 | 0.0              | 0.0     | 0.0   | 35                | 0.0             | 0.0   | 35                | 100.0                          | 5.7                     | 0.0               | 0.0      |
| Pomerania            | 2000-2014       | 70                 | 0.0              | 0.0     | 0.0   | 70                | 0.0             | 0.0   | 70                | 100.0                          | 1.4                     | 0.0               | 0.0      |
| Silesia              | 2000-2014       | 123                | 0.0              | 0.0     | 0.0   | 123               | 0.0             | 0.8   | 122               | 100.0                          | 0.8                     | 0.0               | 0.0      |
| Subcarpathia         | 2000-2014       | 80                 | 0.0              | 0.0     | 0.0   | 80                | 0.0             | 1.3   | 79                | 100.0                          | 10.1                    | 0.0               | 0.0      |
| Varmia-Mazuria       | 2000-2013       | 59                 | 0.0              | 0.0     | 0.0   | 59                | 0.0             | 1.7   | 58                | 100.0                          | 3.4                     | 0.0               | 0.0      |
| West Pomerania       | 2000-2014       | 58                 | 0.0              | 0.0     | 0.0   | 58                | 0.0             | 0.0   | 58                | 100.0                          | 3.4                     | 0.0               | 0.0      |
| Portugal *           | 2000-2014       | 503                | 0.0              | 0.0     | 5.2   | 477               | 0.0             | 0.2   | 476               | 100.0                          | 1.9                     | 2.1               | 0.0      |
| Azores               | 2000-2011       | 20                 | 0.0              | 0.0     | 0.0   | 20                | 0.0             | 0.0   | 20                | 100.0                          | 0.0                     | 0.0               | 0.0      |
| Portugal Central     | 2003-2010       | 73                 | 0.0              | 0.0     | 0.0   | 73                | 0.0             | 0.0   | 73                | 100.0                          | 1.4                     | 1.4               | 0.0      |
| Portugal North       | 2000-2010       | 149                | 0.0              | 0.0     | 0.0   | 149               | 0.0             | 0.0   | 149               | 100.0                          | 1.3                     | 0.0               | 0.0      |
| Portugal South       | 2000-2014       | 261                | 0.0              | 0.0     | 10.0  | 235               | 0.0             | 0.4   | 234               | 100.0                          | 2.6                     | 3.8               | 0.0      |
| Romania (Cluj)       | 2006-2011       | 10                 | 0.0              | 0.0     | 0.0   | 10                | 0.0             | 0.0   | 10                | 100.0                          | 0.0                     | 0.0               | 0.0      |
| Russian registries ‡ | 2000-2014       | 333                | 0.0              | 0.0     | 36.6  | 211               | 0.0             | 1.9   | 207               | 100.0                          | 6.3                     | 4.3               | 2.9      |
| Arkhangelsk          | 2000-2014       | 51                 | 0.0              | 0.0     | 0.0   | 51                | 0.0             | 2.0   | 50                | 100.0                          | 12.0                    | 4.0               | 0.0      |
| Karelia              | 2000-2014       | 23                 | 0.0              | 0.0     | 0.0   | 23                | 0.0             | 8.7   | 21                | 100.0                          | 14.3                    | 4.8               | 28.6     |
| Omsk                 | -               |                    |                  |         |       |                   |                 |       |                   |                                |                         |                   |          |
| Samara               | 2000-2014       | 259                | 0.0              | 0.0     | 47.1  | 137               | 0.0             | 0.7   | 136               | 100.0                          | 2.9                     | 4.4               | 0.0      |
| Tomsk                | -               |                    |                  |         |       |                   |                 |       |                   |                                |                         |                   |          |
| Slovakia *           | 2000-2010       | 185                | 0.0              | 0.0     | 3.2   | 179               | 0.0             | 0.0   | 179               | 100.0                          | 1.1                     | 0.0               | 0.0      |
| Slovenia *           | 2000-2013       | 88                 | 0.0              | 0.0     | 0.0   | 88                | 0.0             | 0.0   | 88                | 100.0                          | 0.0                     | 0.0               | 0.0      |
| Spanish registries   | 2000-2014       | 1,133              | 0.0              | 0.0     | 1.1   | 1,120             | 0.3             | 0.2   | 1,115             | 99.8                           | 0.4                     | 0.4               | 39.8     |
| Basque Country       | 2000-2013       | 80                 | 0.0              | 0.0     | 0.0   | 80                | 2.5             | 0.0   | 78                | 100.0                          | 1.3                     | 0.0               | 0.0      |
| Canaries             | 2000-2011       | 66                 | 0.0              | 0.0     | 0.0   | 66                | 0.0             | 0.0   | 66                | 100.0                          | 0.0                     | 0.0               | 0.0      |
| Girona               | 2000-2013       | 44                 | 0.0              | 0.0     | 15.9  | 37                | 0.0             | 0.0   | 37                | 100.0                          | 0.0                     | 10.8              | 0.0      |
| Granada              | 2000-2012       | 40                 | 0.0              | 0.0     | 0.0   | 40                | 0.0             | 0.0   | 40                | 97.5                           | 2.5                     | 0.0               | 0.0      |
| Mallorca             | 2000-2012       | 35                 | 0.0              | 0.0     | 17.1  | 29                | 0.0             | 0.0   | 29                | 100.0                          | 0.0                     | 0.0               | 0.0      |
| Murcia               | 2000-2010       | 48                 | 0.0              | 0.0     | 0.0   | 48                | 2.1             | 0.0   | 47                | 97.9                           | 2.1                     | 0.0               | 0.0      |
| Navarra              | 2000-2009       | 22                 | 0.0              | 0.0     | 0.0   | 22                | 0.0             | 0.0   | 22                | 100.0                          | 0.0                     | 0.0               | 0.0      |
| Tarragona            | 2000-2011       | 38                 | 0.0              | 0.0     | 0.0   | 38                | 0.0             | 0.0   | 38                | 100.0                          | 0.0                     | 0.0               | 0.0      |
| Spain Childhood      | 2000-2014       | 568                | 0.0              | 0.0     | 0.0   | 568               | 0.0             | 0.4   | 566               | 100.0                          | 0.0                     | 0.0               | 78.4     |
| Valencia Childhood   | 2000-2012       | 192                | 0.0              | 0.0     | 0.0   | 192               | 0.0             | 0.0   | 192               | 100.0                          | 0.5                     | 0.0               | 0.0      |
| Sweden *             | 2000-2014       | 384                | 0.0              | 0.0     | 19.3  | 310               | 0.3             | 0.0   | 309               | 100.0                          | 6.1                     | 0.6               | 0.0      |
| Swiss registries     | 2000-2014       | 409                | 0.0              | 0.0     | 20.8  | 324               | 0.0             | 0.0   | 324               | 100.0                          | 0.0                     | 2.5               | 0.6      |
| Basel                | 2001-2011       |                    |                  |         |       |                   |                 |       |                   |                                |                         |                   |          |
| Fribourg             | -               |                    |                  |         |       |                   |                 |       |                   |                                |                         |                   |          |
| Geneva               | 2000-2013       |                    |                  |         |       |                   |                 |       |                   |                                |                         |                   |          |
| Graubünden-Glarus    | 2002-2007       |                    |                  |         |       |                   |                 |       |                   |                                |                         |                   |          |
| Neuchâtel            | 2002-2014       |                    |                  |         |       |                   |                 |       |                   |                                |                         |                   |          |
| St Gallen-Appenzell  | 2000-2014       |                    |                  |         |       |                   |                 |       |                   |                                |                         |                   |          |
| Ticino               | 2000-2014       |                    |                  |         |       |                   |                 |       |                   |                                |                         |                   |          |
| Valais               | 2002-2014       |                    |                  |         |       |                   |                 |       |                   |                                |                         |                   |          |

Web-table 2.18: Data quality indicators, children diagnosed during 2000-2014, by continent, country and registry: LYMPHOMAS (CHILDREN)

|                              | Calendar period | Patients submitted | Ineligible (%) ¶ |            |            | Eligible patients | Excluded (%) ¶¶ |            | Patients included | Data quality indicators (%) †† |                         |                   |            |
|------------------------------|-----------------|--------------------|------------------|------------|------------|-------------------|-----------------|------------|-------------------|--------------------------------|-------------------------|-------------------|------------|
|                              |                 |                    | Incomplete dates | In situ    | Other      |                   | DCO             | Other      |                   | MV                             | Non-specific morphology | Lost to follow-up | Censored   |
| Zürich                       | 2000-2013       |                    |                  |            |            |                   |                 |            |                   |                                |                         |                   |            |
| Switzerland (Childhood) †    | 2000-2014       | 409                | 0.0              | 0.0        | 20.8       | 324               | 0.0             | 0.0        | 324               | 100.0                          | 0.0                     | 2.5               | 0.6        |
| United Kingdom *             | 2000-2014       | 2,724              | 0.1              | 0.0        | 6.0        | 2,558             | 0.2             | 0.6        | 2,539             | 99.6                           | 2.2                     | 5.6               | 0.0        |
| England                      | 2000-2014       | 2,290              | 0.1              | 0.0        | 4.5        | 2,184             | 0.2             | 0.6        | 2,166             | 99.7                           | 1.4                     | 6.4               | 0.0        |
| Northern Ireland             | 2000-2014       | 93                 | 0.0              | 0.0        | 14.0       | 80                | 0.0             | 0.0        | 80                | 97.5                           | 3.8                     | 0.0               | 0.0        |
| Scotland                     | 2000-2014       | 220                | 0.0              | 0.0        | 18.2       | 180               | 0.0             | 0.0        | 180               | 100.0                          | 6.1                     | 1.1               | 0.0        |
| Wales                        | 2000-2014       | 121                | 0.0              | 0.0        | 5.8        | 114               | 0.0             | 0.9        | 113               | 97.3                           | 9.7                     | 0.0               | 0.0        |
| <b>OCEANIA</b>               |                 | <b>1,374</b>       | <b>0.2</b>       | <b>0.0</b> | <b>8.4</b> | <b>1,255</b>      | <b>0.0</b>      | <b>0.2</b> | <b>1,253</b>      | <b>99.7</b>                    | <b>1.6</b>              | <b>0.0</b>        | <b>0.0</b> |
| Australia *                  | 2000-2014       | 1,156              | 0.3              | 0.0        | 10.0       | 1,037             | 0.0             | 0.1        | 1,036             | 99.6                           | 1.9                     | 0.0               | 0.0        |
| Australian Capital Territory | 2000-2013       | 20                 | 0.0              | 0.0        | 0.0        | 20                | 0.0             | 0.0        | 20                | 95.0                           | 5.0                     | 0.0               | 0.0        |
| New South Wales              | 2000-2012       | 286                | 0.0              | 0.0        | 0.0        | 286               | 0.0             | 0.0        | 286               | 100.0                          | 2.1                     | 0.0               | 0.0        |
| Northern Territory           | 2000-2013       | 15                 | 0.0              | 0.0        | 0.0        | 15                | 0.0             | 0.0        | 15                | 100.0                          | 0.0                     | 0.0               | 0.0        |
| Queensland                   | 2000-2014       | 313                | 0.6              | 0.0        | 30.7       | 215               | 0.0             | 0.0        | 215               | 98.6                           | 3.7                     | 0.0               | 0.0        |
| South Australia              | 2000-2013       | 71                 | 1.4              | 0.0        | 0.0        | 70                | 0.0             | 1.4        | 69                | 100.0                          | 0.0                     | 0.0               | 0.0        |
| Tasmania                     | 2000-2013       | 19                 | 0.0              | 0.0        | 10.5       | 17                | 0.0             | 0.0        | 17                | 100.0                          | 0.0                     | 0.0               | 0.0        |
| Victoria                     | 2000-2014       | 298                | 0.0              | 0.0        | 4.7        | 284               | 0.0             | 0.0        | 284               | 100.0                          | 1.4                     | 0.0               | 0.0        |
| Western Australia            | 2000-2014       | 134                | 0.0              | 0.0        | 3.0        | 130               | 0.0             | 0.0        | 130               | 100.0                          | 0.8                     | 0.0               | 0.0        |
| New Zealand *                | 2000-2014       | 218                | 0.0              | 0.0        | 0.0        | 218               | 0.0             | 0.5        | 217               | 100.0                          | 0.0                     | 0.0               | 0.0        |
| <b>Total</b>                 |                 | <b>43,586</b>      | <b>0.6</b>       | <b>0.0</b> | <b>4.0</b> | <b>41,551</b>     | <b>0.3</b>      | <b>0.5</b> | <b>41,196</b>     | <b>99.5</b>                    | <b>2.9</b>              | <b>3.0</b>        | <b>2.8</b> |

**Web-table 3: Population covered by participating registries (number of persons and % of national population), and number of adults (15-99 years) diagnosed with one of 15 common malignancies and children (0-14 years) diagnosed with one of three common malignancies during 2000-2014 who were included in survival analyses, by continent, country and registry**

**Web-table 3.1 Number of patients included in survival analyses, by continent, country and registry: patients diagnosed during 2000-2004**

**Web-table 3.2 Number of patients included in survival analyses, by continent, country and registry: patients diagnosed during 2005-2009**

**Web-table 3.3 Number of patients included in survival analyses, by continent, country and registry: patients diagnosed during 2010-2014**

\* Data with 100% coverage of the national population

† Data with 100% coverage of the national population for childhood malignancies only

‡ Population for females only

¶ National populations for 2014 from United Nations Population Division, or national authorities (Australia, Guadeloupe, Hong Kong, Poland, Portugal and Taiwan), or the cancer registry

|| **Asia: Korea:** Republic of Korea; **Europe: France, Burgundy (digestive):** coverage now includes Saône-et-Loire *département* as well as Côte-d'Or; **Italy, Biella:** coverage now includes Provincia di Vercelli as well as Provincia di Biella; **Milano:** coverage now includes Provincia di Milano and Lodi as well as Milan; **Naples:** coverage now includes all of the *Azienda Sanitaria Locale* Napoli 3 Sud and the municipalities of Acerra and Casalnuovo; **Romania, Cluj:** coverage now includes Bistrița-Năsăud county as well as Cluj county. **Poland, Holy Cross (formerly Kielce), Lower Silesia (formerly Wrocław), Subcarpathia (formerly Podkarpackie); Russia:** Russian Federation; **Spain Childhood:** data are for the province of Barcelona.

**Web-table 3: Population covered by participating registries (number of persons and % of national population) and number of patients diagnosed during 2000-2014 who were included in survival analyses, by continent, country and registry**

|                                    | Population covered <sup>1</sup> | % of national | Oesophagus     | Stomach        | Colon            | Rectum         | Liver          | Pancreas       | Lung             | Melanoma of skin |
|------------------------------------|---------------------------------|---------------|----------------|----------------|------------------|----------------|----------------|----------------|------------------|------------------|
| <b>AFRICA</b>                      | <b>10,533,762</b>               | <b>3.5</b>    | <b>3,057</b>   | <b>1,731</b>   | <b>2,172</b>     | <b>1,487</b>   | <b>869</b>     | <b>379</b>     | <b>2,734</b>     | <b>368</b>       |
| Algerian registries                | 2,447,075                       | 6.3           | 104            | 1,129          | 1,331            | 827            | 244            | 272            | 1,852            | 248              |
| Annaba                             | 673,875                         | 1.7           | 17             | 210            | 316              | 136            | 54             | 94             | 357              | 36               |
| Sétif                              | 1,669,935                       | 4.3           | 23             | 411            | 585              | 377            | 139            | 82             | 1,048            | 212              |
| Tlemcen                            | 103,265                         | 0.3           | 64             | 508            | 430              | 314            | 51             | 96             | 447              | -                |
| Mali (Bamako)                      | 764,245                         | 9.0           | -              | -              | -                | -              | -              | -              | -                | -                |
| Mauritius *                        | 1,268,567                       | 100.0         | 59             | 494            | 494              | 289            | 27             | 45             | 584              | 4                |
| Morocco (Casablanca)               | 2,178,083                       | 12.7          | -              | -              | -                | -              | -              | -              | -                | -                |
| Nigeria (Ibadan)                   | 2,797,220                       | 1.6           | -              | -              | 230              | 266            | 333            | -              | -                | 69               |
| South Africa (Eastern Cape)        | 1,078,572                       | 2.0           | 2,894          | 108            | 117              | 105            | 265            | 62             | 298              | 47               |
| <b>AMERICA (Central and South)</b> | <b>99,818,363</b>               | <b>23.7</b>   | <b>13,528</b>  | <b>60,643</b>  | <b>82,843</b>    | <b>26,424</b>  | <b>9,019</b>   | <b>15,731</b>  | <b>53,959</b>    | <b>8,202</b>     |
| Argentinian registries             | 3,973,922                       | 9.2           | 1,152          | 2,686          | 6,076            | 1,959          | 968            | 1,657          | 5,195            | 1,084            |
| Chubut                             | 556,319                         | 1.3           | -              | 156            | 439              | 59             | 65             | 88             | 305              | 15               |
| Córdoba                            | 1,405,651                       | 3.3           | 429            | 834            | 2,251            | 726            | 374            | 693            | 2,132            | 455              |
| Mendoza                            | 1,863,809                       | 4.3           | 723            | 1,615          | 3,268            | 1,174          | 529            | 876            | 2,637            | 614              |
| Tierra del Fuego                   | 148,143                         | 0.3           | -              | 81             | 118              | -              | -              | -              | 121              | -                |
| Argentina (Childhood) †            | 10,893,927                      | 100.0         | -              | -              | -                | -              | -              | -              | -                | -                |
| Brazilian registries               | 15,882,624                      | 7.7           | 6,678          | 15,567         | 21,984           | 10,354         | 858            | 5,520          | 4,884            | 1,424            |
| Aracaju                            | 587,701                         | 0.3           | 126            | 477            | 592              | 274            | 136            | 147            | 666              | 211              |
| Cuiabá                             | 417,283                         | 0.4           | -              | -              | -                | -              | -              | -              | -                | -                |
| Curitiba                           | 1,885,104                       | 0.9           | 971            | 2,045          | 2,641            | 1,357          | 475            | 689            | 2,293            | 1,099            |
| Goiânia                            | 1,412,361                       | 0.7           | 449            | -              | -                | -              | 218            | 355            | 1,635            | -                |
| Jaú                                | 133,900                         | 0.1           | 134            | 236            | 376              | 169            | 29             | 115            | 290              | 114              |
| São Paulo                          | 11,446,275                      | 5.6           | 4,998          | 12,809         | 18,375           | 8,554          | -              | 4,214          | -                | -                |
| Chilean registries                 | 2,459,133                       | 13.8          | 918            | 4,423          | 1,949            | 824            | 525            | 793            | 2,166            | 554              |
| Antofagasta                        | 613,328                         | 3.5           | 107            | 501            | 360              | 143            | 105            | 131            | 1,021            | 96               |
| Biobio                             | 390,377                         | 2.2           | 275            | 1,284          | 435              | 213            | 107            | 212            | 324              | 117              |
| Concepción                         | 1,053,880                       | 5.9           | 229            | 1,324          | 671              | 208            | 174            | 217            | 458              | 182              |
| Los Rios                           | 401,548                         | 2.3           | 307            | 1,314          | 483              | 260            | 139            | 233            | 363              | 159              |
| Colombian registries               | 4,277,369                       | 9.0           | 642            | 7,988          | 3,874            | 1,990          | 1,129          | 1,303          | 3,965            | 1,373            |
| Bucaramanga                        | 1,113,522                       | 2.3           | -              | 1,465          | -                | -              | -              | -              | -                | 221              |
| Cali                               | 2,344,734                       | 4.9           | 491            | 4,935          | 3,272            | 1,586          | 992            | 1,097          | 3,400            | 917              |
| Manizales                          | 384,627                         | 0.8           | 76             | 699            | 395              | 256            | 46             | 72             | 366              | 103              |
| Pasto                              | 434,486                         | 0.9           | 75             | 889            | 207              | 148            | 91             | 134            | 199              | 132              |
| Costa Rica *                       | 4,757,606                       | 100.0         | 528            | 8,577          | 5,438            | 1,926          | 1,239          | 1,188          | 2,688            | 1,432            |
| Cuba *                             | 11,379,111                      | 100.0         | -              | 6,664          | 15,047           | -              | -              | -              | 19,344           | -                |
| Ecuadorian registries              | 6,398,546                       | 40.2          | 486            | 7,210          | 3,203            | 1,622          | 1,502          | 1,069          | 2,641            | 1,080            |
| Cuenca Ecuador                     | 534,901                         | 3.4           | 25             | 416            | 144              | 88             | 112            | 105            | 147              | 79               |
| Guayaquil                          | 2,560,505                       | 16.1          | 133            | 1,847          | 1,109            | 555            | 504            | 318            | 903              | 204              |
| Loja                               | 242,881                         | 1.5           | 24             | 655            | 182              | 78             | 94             | 72             | 125              | 75               |
| Manabí                             | 1,366,173                       | 8.6           | 109            | 1,517          | 457              | 228            | 210            | 129            | 406              | 86               |
| Quito                              | 1,694,086                       | 10.7          | 195            | 2,775          | 1,311            | 673            | 582            | 445            | 1,060            | 636              |
| Guadeloupe *                       | 450,273                         | 100.0         | 119            | 521            | 724              | 210            | 82             | 167            | 308              | 52               |
| Martinique *                       | 396,425                         | 100.0         | 213            | 973            | 1,305            | 423            | 206            | 473            | 693              | 164              |
| Mexico (Childhood) †               | 35,188,624                      | 100.0         | -              | -              | -                | -              | -              | -              | -                | -                |
| Peru (Lima)                        | 7,548,697                       | 24.4          | -              | -              | 2,803            | 992            | -              | -              | -                | -                |
| Puerto Rico *                      | 3,686,517                       | 100.0         | 1,743          | 3,900          | 14,594           | 3,882          | 2,202          | 1,984          | 6,570            | 1,039            |
| Uruguay *                          | 3,419,516                       | 100.0         | 1,049          | 2,134          | 5,846            | 2,242          | 308            | 1,577          | 5,505            | -                |
| <b>AMERICA (North)</b>             | <b>301,237,785</b>              | <b>84.8</b>   | <b>195,255</b> | <b>283,566</b> | <b>1,471,548</b> | <b>461,707</b> | <b>246,966</b> | <b>462,187</b> | <b>2,564,507</b> | <b>678,206</b>   |
| Canadian registries                | 27,213,277                      | 76.5          | 18,788         | 33,889         | 166,760          | 60,958         | 20,858         | 41,908         | 236,434          | 65,235           |
| Alberta                            | 4,108,283                       | 11.5          | 2,167          | 3,643          | 17,889           | 7,229          | 2,707          | 5,292          | 25,879           | 7,116            |
| British Columbia                   | 4,645,261                       | 13.1          | 3,545          | 5,368          | 28,192           | 11,578         | 4,277          | 7,723          | 40,337           | 12,095           |
| Manitoba                           | 1,280,953                       | 3.6           | 779            | 1,724          | 8,678            | 3,297          | 924            | 2,193          | 12,339           | 2,293            |
| New Brunswick                      | 754,865                         | 2.1           | 620            | 1,198          | 6,067            | 1,813          | 457            | 1,667          | 10,015           | 2,063            |
| Newfoundland & Labrador            | 528,333                         | 1.5           | 351            | 1,234          | 5,342            | 1,873          | 323            | 649            | 5,421            | 1,134            |
| Nova Scotia                        | 943,294                         | 2.7           | 942            | 1,357          | 8,444            | 3,157          | 604            | 1,897          | 12,598           | 3,390            |
| Ontario                            | 13,685,171                      | 38.5          | 9,559          | 17,854         | 83,426           | 28,730         | 10,927         | 20,357         | 118,061          | 34,652           |
| Prince Edward Island               | 145,832                         | 0.4           | 135            | 177            | 1,201            | 410            | 91             | 272            | 1,724            | 525              |
| Saskatchewan                       | 1,121,285                       | 3.2           | 690            | 1,334          | 7,521            | 2,871          | 548            | 1,858          | 10,060           | 1,967            |
| US registries                      | 274,024,508                     | 85.8          | 176,647        | 249,677        | 1,304,788        | 400,749        | 226,108        | 420,279        | 2,328,073        | 612,971          |
| Alabama                            | 4,846,411                       | 1.5           | 3,661          | 4,802          | 28,321           | 7,892          | 3,889          | 8,573          | 54,509           | 13,012           |
| Alaska                             | 737,046                         | 0.2           | 411            | 526            | 2,528            | 892            | 572            | 761            | 4,341            | 940              |
| Arkansas                           | 2,966,835                       | 0.9           | 1,474          | 2,158          | 13,606           | 4,100          | 1,627          | 3,711          | 29,276           | 4,879            |
| California                         | 38,792,291                      | 12.1          | 15,495         | 31,377         | 130,781          | 43,121         | 32,029         | 43,490         | 199,541          | 75,712           |
| Greater Bay Area                   | 7,253,022                       | 2.3           | 3,810          | 7,977          | 31,864           | 10,373         | 9,757          | 11,288         | 45,758           | 19,151           |
| Greater California                 | 21,429,833                      | 6.7           | 11,485         | 19,137         | 87,421           | 29,944         | 21,908         | 31,383         | 145,911          | 61,882           |
| Los Angeles                        | 10,109,436                      | 3.2           | 4,344          | 12,973         | 41,984           | 14,428         | 11,657         | 14,087         | 54,782           | 17,358           |
| Colorado                           | 5,355,588                       | 1.7           | 2,627          | 3,276          | 18,187           | 6,137          | 3,528          | 6,168          | 27,632           | 13,338           |
| Connecticut                        | 3,594,762                       | 1.1           | 3,143          | 4,990          | 21,514           | 6,655          | 3,735          | 7,782          | 37,127           | 12,185           |
| Delaware                           | 935,968                         | 0.3           | 767            | 955            | 5,124            | 1,523          | 918            | 1,771          | 10,492           | 3,406            |
| Florida                            | 19,905,569                      | 6.2           | 14,842         | 19,713         | 110,218          | 30,736         | 17,758         | 35,379         | 208,529          | 55,134           |
| Georgia                            | 10,097,132                      | 3.2           | 6,046          | 8,092          | 43,737           | 14,387         | 7,303          | 14,171         | 84,697           | 27,350           |
| Atlanta                            | 3,597,601                       | 1.1           | 1,576          | 2,622          | 12,584           | 4,271          | 2,464          | 4,131          | 20,251           | 9,675            |
| Hawaii                             | 1,420,257                       | 0.4           | 783            | 2,422          | 7,682            | 2,740          | 2,167          | 2,737          | 10,615           | 3,704            |
| Idaho                              | 1,634,806                       | 0.5           | 1,026          | 1,093          | 6,517            | 2,308          | 966            | 2,446          | 11,196           | 5,059            |
| Indiana                            | 6,597,880                       | 2.1           | 5,336          | 5,356          | 37,211           | 11,699         | 5,086          | 11,573         | 73,402           | 16,269           |
| Iowa                               | 3,109,481                       | 1.0           | 2,747          | 2,707          | 20,672           | 6,006          | 2,288          | 6,150          | 33,258           | 9,822            |
| Kentucky                           | 4,412,617                       | 1.4           | 3,452          | 4,104          | 28,244           | 9,193          | 3,804          | 7,978          | 65,634           | 14,729           |
| Louisiana                          | 4,648,990                       | 1.5           | 3,409          | 5,309          | 27,068           | 8,694          | 4,775          | 8,711          | 49,885           | 8,982            |
| Maine                              | 1,330,256                       | 0.4           | 1,468          | 1,288          | 8,296            | 2,586          | 990            | 2,755          | 16,641           | 4,565            |
| Massachusetts                      | 6,755,124                       | 2.1           | 4,444          | 5,207          | 28,094           | 8,281          | 4,093          | 8,205          | 47,206           | 14,420           |
| Michigan                           | 9,916,306                       | 3.1           | 8,270          | 9,963          | 52,260           | 15,889         | 8,351          | 18,476         | 103,258          | 25,335           |
| Detroit                            | 3,867,541                       | 1.2           | 3,296          | 5,108          | 23,281           | 7,090          | 4,319          | 8,802          | 45,830           | 9,495            |
| Minnesota                          | 5,457,125                       | 1.7           | 3,638          | 4,101          | 24,959           | 8,127          | 2,923          | 7,326          | 39,372           | 16,421           |
| Mississippi                        | 2,993,443                       | 0.9           | 1,944          | 2,687          | 15,629           | 4,562          | 2,311          | 4,745          | 29,898           | 5,931            |
| Missouri                           | 3,089,318                       | 1.9           | -              | -              | -                | -              | -              | -              | -                | -                |
| Montana                            | 1,023,252                       | 0.3           | 798            | 883            | 5,466            | 1,854          | 648            | 1,721          | 9,799            | 3,272            |
| Nebraska                           | 1,882,980                       | 0.6           | 1,389          | 1,506          | 11,299           | 3,473          | 1,239          | 3,184          | 17,005           | 4,906            |

**Web-table 3: Population covered by participating registries (number of persons and % of national population) and number of patients diagnosed during 2000-2014 who were included in survival analyses, by continent, country and registry**

|                     | Population covered <sup>1</sup> | % of national | Oesophagus     | Stomach        | Colon          | Rectum         | Liver          | Pancreas       | Lung           | Melanoma of skin |
|---------------------|---------------------------------|---------------|----------------|----------------|----------------|----------------|----------------|----------------|----------------|------------------|
| New Hampshire       | 1,327,996                       | 0.4           | 1,468          | 1,189          | 7,192          | 2,426          | 934            | 2,472          | 14,002         | 5,560            |
| New Jersey          | 8,938,844                       | 2.8           | 6,758          | 11,914         | 54,752         | 15,771         | 8,712          | 17,996         | 84,572         | 26,910           |
| New Mexico          | 2,085,567                       | 0.7           | 1,184          | 2,114          | 8,777          | 3,104          | 2,361          | 3,020          | 12,845         | 5,000            |
| New York            | 19,748,858                      | 6.2           | 15,183         | 27,733         | 114,527        | 34,176         | 22,458         | 40,188         | 187,436        | -                |
| New York City       |                                 |               |                |                |                |                |                |                |                |                  |
| North Carolina      | 9,940,387                       | 3.1           | 6,600          | 8,543          | 47,258         | 14,956         | 8,097          | 15,779         | 98,489         | 27,602           |
| Ohio                | 11,596,998                      | 3.6           | 10,066         | 11,587         | 69,797         | 21,097         | 9,173          | 21,290         | 132,512        | 33,079           |
| Oklahoma            | 3,879,610                       | 1.2           | 1,823          | 2,257          | 15,931         | 4,529          | 2,083          | 4,358          | 31,817         | 6,407            |
| Oregon              | 3,971,202                       | 1.2           | 3,025          | 3,060          | 18,202         | 6,225          | 3,550          | 6,449          | 35,196         | 13,637           |
| Pennsylvania        | 12,793,767                      | 4.0           | 12,029         | 15,615         | 88,568         | 26,148         | 13,555         | 28,111         | 148,705        | 38,904           |
| Rhode Island        | 1,054,907                       | 0.3           | 1,036          | 1,490          | 6,672          | 2,023          | 1,219          | 2,091          | 12,558         | 3,688            |
| South Carolina      | 4,829,160                       | 1.5           | 3,734          | 4,854          | 24,897         | 7,588          | 3,859          | 8,340          | 49,817         | 14,230           |
| Tennessee           | 6,547,779                       | 2.0           | 3,337          | 4,198          | 27,691         | 8,021          | 3,391          | 7,468          | 57,680         | 13,003           |
| Texas               | 26,979,078                      | 8.4           | 11,840         | 19,767         | 97,951         | 29,968         | 24,703         | 30,379         | 167,827        | 39,555           |
| Utah                | 2,944,498                       | 0.9           | 978            | 1,362          | 7,792          | 2,806          | 1,306          | 2,978          | 8,192          | 8,908            |
| Vermont             | 626,767                         | 0.2           | 560            | 477            | 3,236          | 1,115          | 453            | 1,141          | 6,483          | 2,679            |
| Washington          | 7,063,166                       | 2.2           | 2,773          | 3,418          | 18,681         | 6,207          | 3,303          | 6,357          | 34,674         | 12,843           |
| Seattle             | 4,851,920                       | 1.5           | 3,278          | 4,284          | 20,827         | 7,477          | 5,453          | 8,051          | 39,973         | 16,938           |
| West Virginia       | 1,848,751                       | 0.6           | 1,828          | 2,070          | 13,775         | 4,332          | 1,543          | 3,584          | 28,874         | 5,682            |
| Wisconsin           | 5,759,432                       | 1.8           | 4,673          | 5,134          | 29,200         | 8,642          | 4,085          | 9,736          | 49,259         | 14,366           |
| Wyoming             | 584,304                         | 0.2           | 402            | 380            | 2,476          | 760            | 323            | 729            | 3,822          | 1,547            |
| <b>ASIA</b>         | <b>227,771,765</b>              | <b>7.2</b>    | <b>206,254</b> | <b>971,935</b> | <b>703,081</b> | <b>361,987</b> | <b>617,479</b> | <b>205,345</b> | <b>950,362</b> | <b>31,314</b>    |
| Chinese registries  | 31,755,347                      | 2.3           | 72,714         | 92,578         | 35,001         | 31,498         | 74,295         | 19,110         | 133,932        | 1,449            |
| Beijing             | 13,068,974                      | 1.0           | 7,084          | 16,203         | 17,223         | 11,708         | 15,438         | 7,181          | 48,087         | 628              |
| Changle             | 704,060                         | 0.1           | 701            | 4,311          | 411            | 464            | 2,028          | 177            | 1,769          | 29               |
| Cixian              | 643,751                         | <0.1          | 7,066          | 3,832          | 337            | 387            | 1,349          | 142            | 2,571          | 15               |
| Dafeng              | 725,369                         | 0.1           | 3,253          | 3,355          | 468            | 748            | 2,342          | 569            | 3,624          | 19               |
| Dalian              | 2,234,063                       | 0.2           | 1,772          | 8,642          | 4,701          | 4,459          | 6,024          | 2,456          | 16,411         | 203              |
| Donghai             | 1,180,227                       | 0.1           | 1,922          | 2,440          | 481            | 579            | 2,542          | 361            | 4,296          | 12               |
| Feicheng            | 985,512                         | 0.1           | 8,163          | 4,302          | 404            | 761            | 2,205          | 269            | 4,048          | 10               |
| Ganyu               | 1,155,800                       | 0.1           | 4,170          | 2,133          | 297            | 903            | 2,077          | 382            | 3,907          | 29               |
| Guanyun             | 1,035,786                       | 0.1           | 2,547          | 1,955          | 362            | 588            | 2,919          | 385            | 3,065          | 22               |
| Haimen              | 1,004,707                       | 0.1           | 2,061          | 4,896          | 1,453          | 1,670          | 6,198          | 1,308          | 8,429          | 85               |
| Haining             | 667,617                         | <0.1          | 831            | 1,574          | 1,071          | 751            | 1,627          | 790            | 3,837          | 44               |
| Jianhu              | 802,536                         | 0.1           | 6,669          | 8,168          | 251            | 827            | 2,776          | 508            | 3,426          | 32               |
| Jiashan             | 386,171                         | <0.1          | 672            | 1,590          | 1,083          | 731            | 1,568          | 633            | 2,869          | 39               |
| Jintan              | 548,011                         | <0.1          | 2,793          | 4,502          | 622            | 573            | 1,082          | 392            | 1,959          | 29               |
| Lianyungang         | 982,064                         | 0.1           | 1,033          | 1,314          | 469            | 508            | 1,315          | 303            | 2,466          | 24               |
| Linzhou             | 1,084,493                       | 0.1           | 8,946          | 8,439          | 627            | 843            | 1,515          | 180            | 1,855          | 44               |
| Qidong              | 1,123,683                       | 0.1           | 1,527          | 4,999          | 1,216          | 2,102          | 9,505          | 1,657          | 8,522          | 60               |
| Sihui               | 415,731                         | <0.1          | 246            | 398            | 433            | 393            | 1,544          | 86             | 1,566          | 21               |
| Taixing             | 1,197,200                       | 0.1           | 6,487          | 4,360          | 465            | 538            | 5,145          | 569            | 3,062          | 17               |
| Yangzhong           | 281,587                         | <0.1          | 2,960          | 3,770          | 346            | 393            | 721            | 130            | 826            | 27               |
| Zhongshan           | 1,528,005                       | 0.1           | 1,811          | 1,395          | 2,281          | 1,572          | 4,375          | 632            | 7,337          | 60               |
| Cyprus *            | 1,153,658                       | 100.0         | 81             | 802            | 2,665          | 788            | 247            | 534            | 2,489          | 589              |
| Hong Kong *         | 7,241,700                       | 100.0         | -              | -              | 28,797         | 12,856         | -              | -              | -              | -                |
| Indian registries   | 1,005,294                       | 0.1           | 269            | 303            | 199            | 191            | 230            | 134            | 850            | 29               |
| Guwahati            | 570,561                         | 0.1           | -              | -              | -              | -              | -              | -              | -              | -                |
| Karunagappally      | 434,733                         | <0.1          | 269            | 303            | 199            | 191            | 230            | 134            | 850            | 29               |
| Iran (Golestan)     | 1,893,646                       | 2.4           | 412            | 353            | 216            | 58             | -              | -              | -              | -                |
| Israel *            | 7,939,483                       | 100.0         | 1,691          | 9,737          | 33,938         | 9,401          | 2,310          | 8,083          | 25,347         | 12,265           |
| Japanese registries | 51,445,407                      | 40.6          | 63,631         | 381,457        | 247,682        | 102,776        | 122,792        | 79,636         | 276,444        | 4,018            |
| Aichi               | 7,485,454                       | 5.9           | 8,167          | 50,356         | 38,370         | 16,605         | 17,307         | 13,111         | 45,734         | 672              |
| Akita               | 1,030,313                       | 0.8           | 1,518          | 8,504          | 5,633          | 1,929          | 1,342          | 1,759          | 4,661          | 79               |
| Ehime               | 1,393,443                       | 1.1           | 1,213          | 9,746          | 5,760          | 2,364          | 4,065          | 2,260          | 7,739          | 121              |
| Fukui               | 787,684                         | 0.6           | 588            | 6,124          | 3,385          | 1,462          | 2,003          | 1,383          | 4,265          | 47               |
| Gunma               | 1,978,062                       | 1.6           | 1,805          | 10,602         | 7,192          | 3,237          | 3,942          | 2,716          | 9,591          | 122              |
| Hiroshima           | 2,831,976                       | 2.2           | 1,970          | 14,180         | 8,949          | 3,986          | 6,107          | 2,691          | 9,920          | 115              |
| Hyogo               | 5,547,802                       | 4.4           | 4,676          | 23,337         | 15,257         | 5,870          | 9,591          | 5,599          | 21,520         | 291              |
| Ibaraki             | 2,943,088                       | 2.3           | 2,307          | 15,718         | 10,037         | 4,468          | 4,704          | 3,534          | 12,192         | 185              |
| Kanagawa            | 9,190,643                       | 7.2           | 14,423         | 82,844         | 55,262         | 22,909         | 21,449         | 14,743         | 50,763         | 909              |
| Miyagi              | 2,321,514                       | 1.8           | 4,502          | 23,554         | 14,540         | 6,030          | 5,199          | 4,482          | 15,292         | 267              |
| Niigata             | 2,312,179                       | 1.8           | 6,723          | 41,722         | 24,315         | 9,086          | 6,473          | 7,199          | 24,013         | 334              |
| Osaka               | 8,844,600                       | 7.0           | 9,889          | 54,037         | 33,815         | 15,486         | 29,032         | 11,705         | 43,946         | 462              |
| Saga                | 832,005                         | 0.7           | 773            | 5,705          | 3,636          | 1,206          | 2,823          | 1,331          | 4,303          | 72               |
| Tochigi             | 1,983,322                       | 1.6           | 2,063          | 13,104         | 8,943          | 3,553          | 4,011          | 2,885          | 9,586          | 153              |
| Yamagata            | 1,122,744                       | 0.9           | 2,415          | 18,343         | 9,836          | 3,480          | 3,151          | 3,286          | 10,317         | 143              |
| Yamanashi           | 840,578                         | 0.7           | 599            | 3,581          | 2,752          | 1,105          | 1,593          | 952            | 2,602          | 46               |
| Jordan *            | 7,416,083                       | 100.0         | 352            | 1,955          | 5,116          | 1,775          | 606            | 952            | 4,282          | 214              |
| Korea * ‡           | 50,074,400                      | 100.0         | 30,627         | 396,213        | 187,078        | 121,053        | 214,821        | 59,357         | 257,345        | 5,771            |
| Kuwait *            | 3,753,121                       | 100.0         | 90             | 207            | 908            | 330            | 261            | 240            | 559            | 18               |
| Malaysia (Penang)   | 1,543,500                       | 5.2           | 290            | 1,061          | 2,285          | 1,126          | 927            | 539            | 2,863          | -                |
| Mongolia *          | 1,468,823                       | 100.0         | -              | -              | -              | -              | -              | -              | -              | -                |
| Qatar *             | 2,172,065                       | 100.0         | 98             | 361            | 784            | 283            | 438            | 186            | 587            | 55               |
| Singapore *         | 3,870,700                       | 100.0         | 1,434          | 6,822          | 17,225         | 6,241          | 7,101          | 3,481          | 17,921         | 367              |
| Taiwan *            | 23,123,866                      | 100.0         | 27,680         | 54,983         | 108,844        | 57,163         | 158,157        | 22,283         | 141,108        | 2,988            |
| Thai registries     | 13,738,188                      | 20.3          | 3,344          | 5,321          | 13,801         | 6,679          | 30,814         | 3,284          | 28,865         | 695              |
| Bangkok             | 8,581,549                       | 12.7          | 1,423          | 2,358          | 7,109          | 2,744          | 10,247         | 1,846          | 12,337         | 206              |
| Khon Kaen           | 1,741,718                       | 2.6           | 208            | 726            | 1,997          | 1,071          | 10,981         | 291            | 3,649          | 147              |
| Lampang             | 740,509                         | 1.1           | 174            | 665            | 1,268          | 826            | 3,894          | 387            | 5,135          | 81               |
| Lamphun             | 408,690                         | 0.6           | 88             | 359            | 652            | 387            | 1,206          | 179            | 2,513          | 53               |
| Lopburi             | 774,812                         | 1.1           | 457            | 813            | 1,308          | 673            | 2,694          | 242            | 2,186          | 97               |
| Songkhla            | 1,490,910                       | 2.2           | 994            | 400            | 1,467          | 978            | 1,792          | 339            | 3,045          | 111              |
| Turkish registries  | 18,176,484                      | 23.4          | 3,541          | 19,782         | 18,542         | 9,769          | 4,480          | 7,526          | 57,770         | 2,856            |
| Ankara              | 5,150,072                       | 6.6           | 962            | 6,135          | 5,458          | 2,792          | 1,360          | 2,159          | 12,557         | 860              |
| Antalya             | 2,222,562                       | 2.9           | 151            | 790            | 1,289          | 623            | 342            | 631            | 3,409          | 248              |
| Bursa               | 2,740,970                       | 3.5           | 304            | 2,289          | 1,712          | 1,105          | 340            | 806            | 6,474          | 262              |
| Edirne              | 398,582                         | 0.5           | 41             | 399            | 415            | 197            | 107            | 147            | 1,525          | 52               |

**Web-table 3: Population covered by participating registries (number of persons and % of national population) and number of patients diagnosed during 2000-2014 who were included in survival analyses, by continent, country and registry**

|                                | Population covered <sup>1</sup> | % of national | Oesophagus     | Stomach        | Colon            | Rectum         | Liver          | Pancreas       | Lung             | Melanoma of skin |
|--------------------------------|---------------------------------|---------------|----------------|----------------|------------------|----------------|----------------|----------------|------------------|------------------|
| Erzurum                        | 766,729                         | 1.0           | 604            | 1,343          | 410              | 145            | 97             | 176            | 1,268            | 65               |
| Eskisehir                      | 799,724                         | 1.0           | 99             | 690            | 840              | 397            | 145            | 334            | 2,226            | 1                |
| Izmir                          | 4,061,074                       | 5.2           | 1,112          | 5,642          | 6,704            | 3,532          | 1,713          | 2,603          | 25,245           | 1,077            |
| Samsun                         | 1,269,989                       | 1.6           | 196            | 1,339          | 1,012            | 591            | 215            | 395            | 3,154            | 163              |
| Trabzon                        | 766,782                         | 1.0           | 72             | 1,155          | 702              | 387            | 161            | 275            | 1,912            | 128              |
| <b>EUROPE</b>                  | <b>321,365,615</b>              | <b>50.0</b>   | <b>294,606</b> | <b>668,096</b> | <b>1,764,170</b> | <b>801,387</b> | <b>283,720</b> | <b>506,723</b> | <b>2,317,434</b> | <b>647,507</b>   |
| Austria *                      | 8,516,916                       | 100.0         | 5,324          | 19,308         | 46,127           | 23,360         | 10,570         | 18,371         | 56,130           | 19,150           |
| Belarus (Childhood) †          | 1,498,163                       | 100.0         | -              | -              | -                | -              | -              | -              | -                | -                |
| Belgium *                      | 11,226,322                      | 100.0         | 10,191         | 15,222         | 63,540           | 27,614         | 7,026          | 15,015         | 83,551           | 21,905           |
| Bulgaria *                     | 7,201,308                       | 100.0         | -              | 21,404         | 37,854           | 22,511         | 5,704          | -              | 50,210           | 5,875            |
| Croatia *                      | 4,255,853                       | 100.0         | 3,007          | 14,589         | 27,382           | 15,309         | 5,456          | 8,596          | 41,744           | 7,848            |
| Czech Republic *               | 10,542,666                      | 100.0         | 7,764          | 24,157         | 83,481           | 34,838         | 12,056         | 27,622         | 93,241           | 27,800           |
| Denmark *                      | 5,646,899                       | 100.0         | 6,556          | 8,022          | 40,495           | 22,384         | 4,708          | 13,279         | 62,402           | 24,630           |
| Estonia *                      | 1,316,203                       | 100.0         | 786            | 5,212          | 6,523            | 3,062          | 903            | 2,698          | 9,201            | 1,983            |
| Finland *                      | 5,479,660                       | 100.0         | 3,686          | 9,871          | 25,374           | 12,847         | 5,096          | 12,851         | 31,950           | 14,949           |
| French registries              | 13,891,552                      | 21.7          | 9,958          | 13,770         | 53,149           | 20,018         | 14,818         | 15,328         | 51,989           | 13,677           |
| Bas-Rhin                       | 1,112,815                       | 1.7           | 897            | 1,251          | 5,080            | 1,924          | 1,525          | 1,550          | 6,157            | 2,078            |
| Basse Normandie                | 1,479,378                       | 2.3           | -              | -              | -                | -              | -              | -              | -                | -                |
| Burgundy Digestive             | 1,087,168                       | 1.7           | 990            | 1,585          | 5,939            | 1,882          | 1,400          | 1,851          | -                | -                |
| Calvados                       | 691,670                         | 1.1           | -              | -              | -                | -              | -              | -              | 4,036            | -                |
| Calvados Digestive             | 691,670                         | 1.1           | 796            | 842            | 2,778            | 1,275          | 1,114          | 1,068          | -                | -                |
| Côte-d'Or Gynaecologic         | 274,316                         | 0.8           | -              | -              | -                | -              | -              | -              | -                | -                |
| Côte-d'Or Haematopoietic       | 531,380                         | 0.8           | -              | -              | -                | -              | -              | -              | -                | -                |
| Doubs                          | 534,710                         | 0.8           | 344            | 608            | 2,259            | 941            | 558            | 702            | 2,998            | 802              |
| Finistère                      | 905,855                         | 1.4           | 820            | 834            | 2,824            | 1,097          | 902            | 715            | -                | -                |
| Gironde CNS                    | 1,526,016                       | 2.4           | -              | -              | -                | -              | -              | -              | -                | -                |
| Gironde General                | 1,526,016                       | 2.4           | 348            | 556            | 2,693            | 930            | 616            | 766            | 3,432            | 902              |
| Gironde Haematopoietic         | 1,526,016                       | 2.4           | -              | -              | -                | -              | -              | -              | -                | -                |
| Haut-Rhin                      | 760,134                         | 1.2           | 591            | 966            | 3,755            | 1,282          | 798            | 908            | 3,961            | 1,545            |
| Haute-Vienne                   | 376,199                         | 0.6           | 27             | 49             | 199              | 80             | 35             | 65             | 165              | 62               |
| Hérault                        | 1,107,398                       | 1.7           | 676            | 1,152          | 5,267            | 1,827          | 1,350          | 1,636          | 6,167            | 1,245            |
| Isère                          | 1,243,597                       | 1.9           | 684            | 1,371          | 5,049            | 1,817          | 1,539          | 1,651          | 6,216            | 1,896            |
| Lille Metro                    | 793,462                         | 1.2           | 239            | 188            | 944              | 350            | 282            | 277            | 1,359            | 322              |
| Loire-Atlantique               | 2,008,714                       | 3.1           | 1,885          | 2,136          | 9,091            | 3,571          | 3,111          | 2,041          | 8,770            | 3,512            |
| Manche                         | 499,958                         | 0.8           | 659            | 1,032          | 2,501            | 1,080          | 589            | 668            | 2,874            | 777              |
| Somme                          | 571,632                         | 0.9           | 706            | 708            | 2,529            | 1,045          | 645            | 742            | 3,548            | -                |
| Tarn                           | 384,474                         | 0.6           | 296            | 492            | 2,241            | 917            | 354            | 688            | 2,306            | 536              |
| France Childhood Haem †        | 11,866,825                      | 100.0         | -              | -              | -                | -              | -              | -              | -                | -                |
| France Childhood Solid †       | 11,866,825                      | 100.0         | -              | -              | -                | -              | -              | -              | -                | -                |
| German registries              | 29,655,933                      | 36.8          | 27,208         | 75,378         | 191,396          | 99,791         | 28,301         | 57,498         | 212,897          | 78,713           |
| Brandenburg                    | 2,453,547                       | 3.0           | 2,674          | 7,470          | 17,176           | 10,013         | 2,888          | 5,875          | 22,123           | 6,012            |
| Bremen                         | 657,391                         | 0.8           | 861            | 1,793          | 5,121            | 2,508          | 678            | 1,620          | 7,165            | 1,676            |
| Hamburg                        | 1,803,752                       | 2.2           | 1,983          | 3,729          | 10,328           | 4,912          | 1,747          | 3,773          | 15,312           | 4,659            |
| Lower Saxony                   | 7,808,649                       | 9.7           | 6,270          | 16,499         | 46,194           | 21,143         | 5,098          | 12,275         | 46,919           | 21,519           |
| Mecklenburg-W. Pomerania       | 1,597,835                       | 2.0           | 2,084          | 5,802          | 11,328           | 6,375          | 2,163          | 4,111          | 15,550           | 4,102            |
| Rhineland Palatinate           | 3,994,366                       | 5.0           | 3,443          | 8,988          | 27,254           | 13,162         | 3,679          | 6,463          | 25,318           | 13,195           |
| Saarland                       | 1,022,585                       | 1.3           | 952            | 2,641          | 7,747            | 3,993          | 1,227          | 1,882          | 9,415            | 2,284            |
| Saxony                         | 4,050,848                       | 5.0           | 4,359          | 15,077         | 32,397           | 18,916         | 6,367          | 11,592         | 33,098           | 11,033           |
| Schleswig-Holstein             | 4,108,138                       | 5.1           | 2,672          | 6,818          | 18,559           | 9,517          | 1,644          | 4,564          | 20,816           | 8,263            |
| Thuringia                      | 2,158,822                       | 2.7           | 1,910          | 6,561          | 15,292           | 9,252          | 2,810          | 5,343          | 17,181           | 5,970            |
| Gibraltar *                    | 31,997                          | 100.0         | 12             | 29             | 81               | 21             | 5              | 13             | 63               | 31               |
| Greece (National Paediatric) † | 1,610,335                       | 100.0         | -              | -              | -                | -              | -              | -              | -                | -                |
| Iceland *                      | 327,318                         | 100.0         | 271            | 473            | 1,433            | 580            | 165            | 481            | 2,314            | 713              |
| Ireland *                      | 4,675,164                       | 100.0         | 4,899          | 6,801          | 21,724           | 9,085          | 2,178          | 5,931          | 26,838           | 9,470            |
| Italian registries             | 34,479,972                      | 57.7          | 12,219         | 80,686         | 188,983          | 53,226         | 63,084         | 56,698         | 203,548          | 46,607           |
| Alto Adige                     | 518,518                         | 0.9           | 290            | 1,448          | 2,647            | 885            | 813            | 901            | 2,364            | 1,198            |
| Barletta-Andria-Trani          | 394,387                         | 0.7           | 34             | 437            | 1,187            | 305            | 724            | 288            | 1,173            | 338              |
| Basilicata                     | 576,619                         | 1.0           | 77             | 706            | 1,477            | 537            | 716            | 405            | 1,392            | 275              |
| Bergamo                        | 1,108,853                       | 1.9           | 302            | 2,046          | 3,600            | 909            | 2,036          | 1,524          | 4,341            | 1,193            |
| Biella-Vercelli                | 357,210                         | 0.6           | 156            | 672            | 1,965            | 623            | 623            | 601            | 2,381            | 517              |
| Brescia                        | 1,162,777                       | 1.9           | 555            | 3,213          | 5,344            | 1,200          | 3,003          | 1,910          | 6,232            | 1,343            |
| Brindisi                       | 400,721                         | 0.7           | 20             | 186            | 531              | 172            | 220            | 144            | 683              | 125              |
| Caserta                        | 924,614                         | 1.5           | 38             | 490            | 1,108            | 293            | 563            | 267            | 1,420            | 225              |
| Catania-Messina-Enna           | 1,936,531                       | 3.2           | 297            | 3,302          | 9,315            | 2,562          | 2,357          | 2,611          | 9,334            | 1,553            |
| Catanzaro                      | 363,707                         | 0.6           | 43             | 523            | 962              | 330            | 295            | 193            | 835              | 191              |
| Como                           | 599,905                         | 1.0           | 178            | 1,485          | 3,145            | 775            | 1,160          | 993            | 3,302            | 957              |
| Cremona                        | 361,610                         | 0.6           | 157            | 951            | 1,391            | 345            | 654            | 544            | 1,582            | 275              |
| Ferrara                        | 354,073                         | 0.6           | 225            | 1,238          | 4,139            | 915            | 997            | 1,051          | 4,204            | 618              |
| Friuli-Venezia-Giulia          | 1,227,122                       | 2.1           | 1,071          | 4,412          | 9,808            | 2,651          | 3,008          | 2,975          | 9,129            | 2,732            |
| Genoa                          | 862,175                         | 1.4           | 458            | 2,306          | 7,485            | 2,038          | 1,858          | 1,940          | 8,003            | 1,739            |
| Latina                         | 572,472                         | 1.0           | 159            | 1,294          | 2,976            | 865            | 665            | 727            | 3,642            | 961              |
| Lecce                          | 806,412                         | 1.3           | 131            | 835            | 2,367            | 683            | 907            | 638            | 3,213            | 380              |
| Mantova                        | 414,919                         | 0.7           | 210            | 1,365          | 3,074            | 845            | 817            | 976            | 3,090            | 605              |
| Milano                         | 3,449,151                       | 5.8           | 1,074          | 5,851          | 15,258           | 4,685          | 5,347          | 4,839          | 17,956           | 4,351            |
| Modena                         | 702,364                         | 1.2           | 250            | 2,459          | 5,941            | 1,468          | 1,517          | 1,737          | 6,397            | 1,313            |
| Monza-Brianza                  | 864,557                         | 1.4           | 201            | 1,393          | 3,081            | 836            | 1,101          | 1,030          | 3,196            | 864              |
| Naples                         | 1,183,117                       | 2.0           | 174            | 1,652          | 3,754            | 1,000          | 3,130          | 980            | 5,417            | 871              |
| Nuoro                          | 216,055                         | 0.4           | 107            | 432            | 1,086            | 346            | 612            | 398            | 940              | 108              |
| Palermo                        | 1,276,525                       | 2.1           | 204            | 1,640          | 5,990            | 1,717          | 2,204          | 1,646          | 6,034            | 973              |
| Parma                          | 445,394                         | 0.7           | 314            | 2,464          | 4,617            | 1,015          | 2,090          | 1,731          | 4,781            | 1,296            |
| Pavia                          | 548,722                         | 0.9           | 190            | 1,163          | 2,795            | 735            | 1,306          | 781            | 3,138            | 458              |
| Piacenza                       | 288,013                         | 0.5           | 79             | 660            | 1,267            | 293            | 520            | 454            | 1,380            | 272              |
| Ragusa                         | 318,983                         | 0.5           | 75             | 822            | 2,617            | 852            | 940            | 801            | 2,509            | 497              |
| Reggio Emilia                  | 533,248                         | 0.9           | 210            | 1,986          | 3,778            | 1,034          | 990            | 1,378          | 4,510            | 935              |
| Romagna                        | 1,123,093                       | 1.9           | 385            | 6,522          | 11,120           | 2,847          | 1,906          | 3,354          | 11,688           | 2,986            |
| Salerno                        | 1,108,509                       | 1.9           | 202            | 1,720          | 4,488            | 1,216          | 1,825          | 1,036          | 5,521            | 868              |
| Sassari                        | 494,665                         | 0.8           | 242            | 760            | 2,565            | 766            | 1,106          | 919            | 2,930            | 384              |

**Web-table 3: Population covered by participating registries (number of persons and % of national population) and number of patients diagnosed during 2000-2014 who were included in survival analyses, by continent, country and registry**

|                              | Population covered <sup>1</sup> | % of national | Oesophagus     | Stomach          | Colon            | Rectum           | Liver            | Pancreas         | Lung             | Melanoma of skin |
|------------------------------|---------------------------------|---------------|----------------|------------------|------------------|------------------|------------------|------------------|------------------|------------------|
| Siracusa                     | 405,111                         | 0.7           | 77             | 708              | 2,358            | 645              | 862              | 689              | 2,475            | 423              |
| Sondrio                      | 182,086                         | 0.3           | 156            | 696              | 1,263            | 317              | 588              | 518              | 1,601            | 296              |
| Taranto                      | 588,367                         | 1.0           | 62             | 686              | 1,954            | 515              | 736              | 528              | 2,232            | 485              |
| Trapani                      | 436,296                         | 0.7           | 83             | 536              | 1,638            | 480              | 444              | 504              | 1,834            | 436              |
| Trento                       | 537,416                         | 0.9           | 432            | 1,300            | 3,064            | 788              | 1,043            | 1,020            | 2,550            | 693              |
| Turin                        | 896,773                         | 1.5           | 481            | 2,429            | 8,266            | 2,473            | 2,237            | 2,139            | 9,029            | 2,070            |
| Tuscany                      | 1,265,167                       | 2.1           | 348            | 4,473            | 8,221            | 2,788            | 1,677            | 2,164            | 8,549            | 2,555            |
| Umbria                       | 894,762                         | 1.5           | 336            | 4,944            | 9,074            | 2,908            | 2,218            | 2,392            | 8,067            | 1,818            |
| Varese                       | 890,234                         | 1.5           | 517            | 3,003            | 6,936            | 1,836            | 1,922            | 1,906            | 7,347            | 1,866            |
| Veneto                       | 2,566,784                       | 4.3           | 1,578          | 4,980            | 14,201           | 4,439            | 5,082            | 4,771            | 16,015           | 4,219            |
| Viterbo                      | 321,955                         | 0.5           | 41             | 498              | 1,130            | 294              | 265              | 295              | 1,132            | 345              |
| Piedmont Childhood           | 574,988                         | 7.0           | -              | -                | -                | -                | -                | -                | -                | -                |
| Latvia *                     | 1,989,354                       | 100.0         | 1,294          | 6,878            | 7,658            | 4,748            | 464              | 1,072            | 9,691            | 2,503            |
| Lithuania *                  | 2,916,798                       | 100.0         | 2,130          | 11,840           | 11,148           | 7,694            | 1,776            | 5,421            | 18,499           | 3,317            |
| Malta *                      | 417,723                         | 100.0         | 184            | 656              | 1,908            | 781              | 152              | 709              | 2,043            | 541              |
| Netherlands *                | 16,868,020                      | 100.0         | 25,342         | 29,585           | 126,237          | 51,839           | 6,397            | 28,717           | 159,895          | 59,088           |
| Norway *                     | 5,147,970                       | 100.0         | 3,021          | 7,548            | 36,646           | 16,306           | 1,916            | 6,671            | 33,558           | 19,994           |
| Poland *                     | 38,483,957                      | 100.0         | 18,959         | 79,466           | 140,075          | 83,669           | 20,764           | 47,635           | 306,136          | 35,834           |
| Greater Poland               | 3,469,464                       | 9.0           | 1,737          | 6,851            | 13,250           | 7,454            | 1,987            | 4,183            | 25,296           | 3,306            |
| Holy Cross                   | 1,265,415                       | 3.3           | 608            | 3,159            | 4,952            | 3,231            | 574              | 1,957            | 11,236           | 1,330            |
| Kuiavia-Pomerania            | 2,090,836                       | 5.4           | 1,036          | 4,342            | 7,894            | 4,605            | 1,057            | 2,246            | 19,156           | 1,699            |
| Lesser Poland                | 3,364,176                       | 8.7           | 1,518          | 7,456            | 11,139           | 7,078            | 1,718            | 4,385            | 24,238           | 3,759            |
| Łódź                         | 2,508,464                       | 6.5           | 1,408          | 5,375            | 9,224            | 5,597            | 1,501            | 3,459            | 20,222           | 2,410            |
| Lower Silesia                | 2,908,457                       | 7.6           | 1,638          | 6,845            | 12,497           | 7,327            | 2,672            | 4,407            | 27,732           | 2,677            |
| Lublin                       | 2,151,836                       | 5.6           | 819            | 3,854            | 7,239            | 4,808            | 992              | 2,622            | 16,369           | 1,730            |
| Lubush                       | 1,020,767                       | 2.7           | 422            | 2,099            | 3,700            | 2,365            | 457              | 1,114            | 7,874            | 707              |
| Mazovia                      | 5,324,519                       | 13.8          | 1,985          | 8,239            | 17,634           | 10,101           | 2,154            | 5,552            | 37,954           | 5,348            |
| Opole                        | 1,002,575                       | 2.6           | 619            | 2,355            | 4,060            | 2,591            | 453              | 1,249            | 8,089            | 1,026            |
| Podlaha                      | 1,193,348                       | 3.1           | 584            | 2,404            | 4,120            | 2,584            | 615              | 1,234            | 7,466            | 803              |
| Pomerania                    | 2,298,811                       | 6.0           | 1,215          | 4,510            | 8,848            | 4,600            | 1,286            | 2,546            | 19,638           | 2,268            |
| Silesia                      | 4,593,358                       | 11.9          | 3,105          | 11,373           | 18,328           | 10,572           | 2,854            | 6,604            | 38,051           | 4,291            |
| Subcarpathia                 | 2,128,483                       | 5.5           | 812            | 4,817            | 6,632            | 4,563            | 1,026            | 2,937            | 14,198           | 1,871            |
| Varmia-Mazuria               | 1,445,478                       | 3.8           | 629            | 2,925            | 4,775            | 2,836            | 703              | 1,383            | 13,309           | 1,033            |
| West Pomerania               | 1,717,970                       | 4.5           | 824            | 2,862            | 5,783            | 3,357            | 715              | 1,757            | 15,308           | 1,576            |
| Portugal *                   | 10,566,132                      | 100.0         | 6,122          | 33,865           | 57,219           | 25,989           | 5,107            | 8,303            | 40,422           | 9,358            |
| Azores                       | 246,353                         | 2.3           | 147            | 716              | 976              | 345              | 157              | 350              | 1,669            | 264              |
| Portugal Central             | 2,284,476                       | 21.6          | 433            | 4,022            | 7,093            | 3,735            | 686              | 478              | 3,513            | 590              |
| Portugal North               | 3,194,969                       | 30.2          | 2,007          | 12,541           | 14,276           | 6,991            | 1,307            | 1,765            | 11,019           | 2,003            |
| Portugal South               | 4,840,334                       | 45.8          | 3,535          | 16,586           | 34,874           | 14,918           | 2,957            | 5,710            | 24,221           | 6,501            |
| Romania (Cluj)               | 983,525                         | 5.0           | 216            | 1,201            | 1,552            | 657              | 547              | 563              | 2,126            | 436              |
| Russian registries ‡         | 8,081,400                       | 5.6           | 6,000          | 31,711           | 28,946           | 16,305           | 3,757            | 10,048           | 42,434           | 4,914            |
| Arkhangelsk                  | 1,191,800                       | 0.8           | 1,913          | 7,508            | 5,284            | 3,022            | 907              | 2,044            | 8,279            | 1,089            |
| Karelia                      | 634,400                         | 0.4           | 906            | 3,708            | 3,148            | 1,463            | 282              | 1,059            | 4,245            | 724              |
| Omsk                         | 1,973,900                       | 1.4           | 661            | 4,598            | 4,672            | 2,705            | 419              | 1,287            | 6,850            | -                |
| Samara                       | 3,211,200                       | 2.2           | 2,041          | 13,280           | 13,607           | 7,887            | 1,997            | 4,756            | 19,513           | 3,101            |
| Tomsk                        | 1,070,100                       | 0.7           | 479            | 2,617            | 2,235            | 1,228            | 152              | 902              | 3,547            | -                |
| Slovakia *                   | 5,422,861                       | 100.0         | 2,794          | 9,604            | 23,694           | 11,066           | 2,741            | 6,624            | 22,971           | 6,389            |
| Slovenia *                   | 2,066,068                       | 100.0         | 1,202          | 6,443            | 12,376           | 6,682            | 1,964            | 4,073            | 16,051           | 5,603            |
| Spanish registries           | 9,396,745                       | 20.3          | 5,637          | 17,844           | 54,250           | 18,245           | 11,848           | 12,438           | 54,237           | 11,028           |
| Basque Country               | 2,215,234                       | 4.8           | 2,201          | 7,098            | 19,083           | 6,197            | 4,400            | 4,368            | 17,856           | 3,428            |
| Canaries                     | 1,741,093                       | 3.8           | 1,012          | 1,911            | 6,833            | 2,335            | 1,699            | 1,795            | 7,816            | 1,497            |
| Girona                       | 756,156                         | 1.6           | 536            | 1,632            | 5,076            | 1,746            | 1,077            | 1,045            | 4,830            | 892              |
| Granada                      | 919,455                         | 2.0           | 342            | 1,582            | 4,567            | 1,522            | 1,106            | 998              | 4,660            | 1,153            |
| Mallorca                     | 872,338                         | 1.9           | 430            | 1,125            | 4,468            | 1,537            | 1,020            | 965              | 5,204            | 953              |
| Murcia                       | 1,462,881                       | 3.2           | 444            | 1,938            | 6,306            | 2,016            | 1,076            | 1,310            | 6,115            | 1,451            |
| Navarra                      | 636,003                         | 1.4           | 312            | 1,406            | 3,220            | 1,403            | 635              | 935              | 3,510            | 770              |
| Tarragona                    | 793,585                         | 1.7           | 360            | 1,152            | 4,697            | 1,489            | 835              | 1,022            | 4,246            | 884              |
| Spain Childhood              | 2,063,339                       | 30.0          | -              | -                | -                | -                | -                | -                | -                | -                |
| Valencia Childhood           | 757,065                         | 11.0          | -              | -                | -                | -                | -                | -                | -                | -                |
| Sweden *                     | 9,703,247                       | 100.0         | 6,233          | 13,463           | 55,664           | 29,777           | 7,242            | 14,240           | 51,122           | 36,921           |
| Swiss registries             | 4,368,854                       | 53.2          | 3,583          | 6,135            | 21,137           | 8,633            | 5,070            | 7,694            | 27,116           | 14,893           |
| Basel                        | 480,347                         | 5.8           | 214            | 360              | 1,413            | 487              | 164              | 279              | 1,689            | 728              |
| Fribourg                     | 303,377                         | 3.7           | 150            | 253              | 877              | 318              | 193              | 308              | 1,187            | 682              |
| Geneva                       | 478,431                         | 5.8           | 445            | 577              | 2,407            | 907              | 756              | 903              | 3,217            | 1,888            |
| Graubünden-Glarus            | 235,680                         | 2.9           | 237            | 475              | 1,350            | 543              | 264              | 551              | 1,804            | 885              |
| Neuchâtel                    | 176,797                         | 2.2           | 197            | 246              | 1,160            | 512              | 265              | 419              | 1,603            | 731              |
| St Gallen-Appenzell          | 565,742                         | 6.9           | 492            | 865              | 2,970            | 1,323            | 544              | 1,176            | 3,616            | 1,945            |
| Ticino                       | 350,363                         | 4.3           | 391            | 876              | 2,289            | 1,092            | 892              | 882              | 3,111            | 1,343            |
| Valais                       | 331,763                         | 4.0           | 358            | 609              | 1,716            | 643              | 641              | 657              | 2,458            | 1,142            |
| Zürich                       | 1,446,354                       | 17.6          | 1,099          | 1,874            | 6,955            | 2,808            | 1,351            | 2,519            | 8,431            | 5,549            |
| Switzerland Childhood †      | 1,212,271                       | 100.0         | -              | -                | -                | -                | -                | -                | -                | -                |
| United Kingdom *             | 64,596,700                      | 100.0         | 120,008        | 116,935          | 398,118          | 174,350          | 53,905           | 118,134          | 605,055          | 163,337          |
| England                      | 54,316,600                      | 84.1          | 98,253         | 94,554           | 324,752          | 143,871          | 44,066           | 98,545           | 484,971          | 136,001          |
| Northern Ireland             | 1,840,500                       | 2.8           | 2,631          | 3,388            | 11,280           | 4,684            | 1,154            | 2,824            | 15,049           | 4,048            |
| Scotland                     | 5,347,600                       | 8.3           | 12,599         | 11,771           | 39,633           | 15,906           | 5,763            | 10,261           | 72,421           | 14,765           |
| Wales                        | 3,092,000                       | 4.8           | 6,525          | 7,222            | 22,453           | 9,889            | 2,922            | 6,504            | 32,614           | 8,523            |
| <b>OCEANIA</b>               | <b>27,952,971</b>               | <b>100.0</b>  | <b>21,728</b>  | <b>33,411</b>    | <b>174,823</b>   | <b>67,496</b>    | <b>20,311</b>    | <b>39,014</b>    | <b>162,266</b>   | <b>187,512</b>   |
| Australia *                  | 23,457,489                      | 100.0         | 17,877         | 27,952           | 144,382          | 56,260           | 17,281           | 33,319           | 136,318          | 156,302          |
| Australian Capital Territory | 385,346                         | 1.6           | 180            | 316              | 1,883            | 653              | 196              | 367              | 1,251            | 1,796            |
| New South Wales              | 7,513,418                       | 32.0          | 5,135          | 8,368            | 42,944           | 16,945           | 5,485            | 10,071           | 40,466           | 45,992           |
| Northern Territory           | 243,368                         | 1.0           | 137            | 110              | 632              | 288              | 172              | 153              | 899              | 765              |
| Queensland                   | 4,719,925                       | 20.1          | 3,879          | 5,390            | 31,894           | 11,697           | 3,351            | 6,680            | 30,036           | 46,216           |
| South Australia              | 1,685,550                       | 7.2           | 1,451          | 2,299            | 12,524           | 4,230            | 1,301            | 2,835            | 11,097           | 9,550            |
| Tasmania                     | 514,726                         | 2.2           | 626            | 747              | 4,210            | 1,592            | 310              | 880              | 3,951            | 3,609            |
| Victoria                     | 5,838,110                       | 24.9          | 4,657          | 8,084            | 37,220           | 15,736           | 4,946            | 8,970            | 34,708           | 32,818           |
| Western Australia            | 2,557,046                       | 10.9          | 1,812          | 2,638            | 13,075           | 5,119            | 1,520            | 3,363            | 13,910           | 15,556           |
| New Zealand *                | 4,495,482                       | 100.0         | 3,851          | 5,459            | 30,441           | 11,236           | 3,030            | 5,695            | 25,948           | 31,210           |
| <b>Total</b>                 | <b>988,680,261</b>              | <b>20.2</b>   | <b>734,428</b> | <b>2,019,382</b> | <b>4,198,637</b> | <b>1,720,488</b> | <b>1,178,364</b> | <b>1,229,379</b> | <b>6,051,262</b> | <b>1,553,109</b> |

**Web-table 3: Population covered by participating registries (number of persons and % of national population) and number of patients diagnosed during 2000-2014 who were included in survival analyses, by continent, country and registry**

|                                    | Breast<br>(women) | Cervix         | Ovary          | Prostate         | Brain<br>(adults) | Brain<br>(children) | Myeloid<br>(adults) | Lymphoid<br>(adults) | ALL<br>(children) | Lymphoma<br>(children) | Total             |
|------------------------------------|-------------------|----------------|----------------|------------------|-------------------|---------------------|---------------------|----------------------|-------------------|------------------------|-------------------|
| <b>AFRICA</b>                      | <b>15,117</b>     | <b>5,017</b>   | <b>1,010</b>   | <b>2,726</b>     | <b>592</b>        | <b>179</b>          | <b>425</b>          | <b>2,042</b>         | <b>64</b>         | <b>228</b>             | <b>40,197</b>     |
| Algerian registries                | 5,196             | 885            | 423            | 764              | 392               | 109                 | 290                 | 1,376                | 45                | 115                    | 15,602            |
| Annaba                             | 1,487             | 91             | 101            | 190              | 7                 | 25                  | 156                 | 514                  | 41                | 40                     | 3,872             |
| Sétif                              | 1,718             | 429            | 112            | 270              | 125               | 38                  | 134                 | 300                  | 4                 | 16                     | 6,023             |
| Tlemcen                            | 1,991             | 365            | 210            | 304              | 260               | 46                  | -                   | 562                  | -                 | 59                     | 5,707             |
| Mali (Bamako)                      | 60                | -              | -              | -                | -                 | -                   | -                   | -                    | -                 | -                      | 60                |
| Mauritius *                        | 483               | 436            | 244            | 628              | 36                | 3                   | 42                  | 86                   | -                 | 5                      | 3,959             |
| Morocco (Casablanca)               | 4,683             | -              | -              | -                | -                 | -                   | -                   | -                    | -                 | -                      | 4,683             |
| Nigeria (Ibadan)                   | 3,962             | 1,578          | 225            | 833              | 148               | 45                  | 76                  | 412                  | 12                | 85                     | 8,274             |
| South Africa (Eastern Cape)        | 733               | 2,118          | 118            | 501              | 16                | 22                  | 17                  | 168                  | 7                 | 23                     | 7,619             |
| <b>AMERICA (Central and South)</b> | <b>159,976</b>    | <b>49,067</b>  | <b>16,023</b>  | <b>115,102</b>   | <b>8,547</b>      | <b>4,936</b>        | <b>10,842</b>       | <b>47,740</b>        | <b>13,299</b>     | <b>5,065</b>           | <b>700,946</b>    |
| Argentinian registries             | 15,282            | 2,467          | 1,688          | 7,115            | 1,217             | 2,662               | 1,588               | 4,281                | 5,119             | 1,955                  | 64,151            |
| Chubut                             | 601               | 186            | 39             | 72               | 43                | -                   | 34                  | 104                  | -                 | -                      | 2,206             |
| Córdoba                            | 6,310             | 895            | 720            | 2,899            | 561               | -                   | 398                 | 1,657                | -                 | -                      | 21,334            |
| Mendoza                            | 8,116             | 1,386          | 929            | 4,076            | 613               | -                   | 1,156               | 2,520                | -                 | -                      | 30,232            |
| Tierra del Fuego                   | 255               | -              | -              | 68               | -                 | -                   | -                   | -                    | -                 | -                      | 643               |
| Argentina (Childhood) †            | -                 | -              | -              | -                | -                 | 2,662               | -                   | -                    | 5,119             | 1,955                  | 9,736             |
| Brazilian registries               | 49,811            | 3,083          | 1,201          | 7,556            | 1,011             | 168                 | 852                 | 3,270                | 233               | 143                    | 134,597           |
| Aracaju                            | 1,935             | 658            | 264            | 2,383            | 172               | 43                  | 171                 | 642                  | 40                | 29                     | 8,966             |
| Cuiabá                             | -                 | 744            | -              | -                | -                 | -                   | -                   | -                    | -                 | -                      | 744               |
| Curitiba                           | 7,172             | 1,577          | 853            | 4,619            | 766               | 115                 | 560                 | 2,383                | 181               | 99                     | 29,895            |
| Goiânia                            | 3,843             | -              | -              | -                | -                 | -                   | -                   | -                    | -                 | -                      | 6,500             |
| Jaú                                | 559               | 104            | 84             | 554              | 73                | 10                  | 121                 | 245                  | 12                | 15                     | 3,240             |
| São Paulo                          | 36,302            | -              | -              | -                | -                 | -                   | -                   | -                    | -                 | -                      | 85,252            |
| Chilean registries                 | 3,717             | 1,564          | 698            | 4,816            | 475               | 83                  | 652                 | 1,968                | 171               | 67                     | 26,363            |
| Antofagasta                        | 721               | 267            | 112            | 607              | 52                | 15                  | 116                 | 313                  | 32                | 18                     | 4,717             |
| Biobio                             | 727               | 355            | 164            | 1,183            | 132               | 21                  | 161                 | 444                  | 44                | 9                      | 6,207             |
| Concepción                         | 1,307             | 475            | 222            | 1,412            | 164               | 24                  | 184                 | 636                  | 49                | 25                     | 7,961             |
| Los Rios                           | 962               | 467            | 200            | 1,614            | 127               | 23                  | 191                 | 575                  | 46                | 15                     | 7,478             |
| Colombian registries               | 9,609             | 5,124          | 1,759          | 8,722            | 1,601             | 243                 | 1,476               | 5,004                | 306               | 137                    | 56,245            |
| Bucaramanga                        | -                 | 901            | -              | -                | -                 | -                   | -                   | -                    | -                 | -                      | 2,587             |
| Cali                               | 8,069             | 3,221          | 1,453          | 7,631            | 1,402             | 211                 | 1,289               | 4,177                | 235               | 106                    | 44,484            |
| Manizales                          | 871               | 403            | 130            | 614              | 63                | 9                   | 70                  | 323                  | 31                | 15                     | 4,542             |
| Pasto                              | 669               | 599            | 176            | 477              | 136               | 23                  | 117                 | 504                  | 40                | 16                     | 4,632             |
| Costa Rica *                       | 12,019            | 7,466          | 1,408          | 11,345           | 1,067             | 153                 | 857                 | 4,646                | 456               | 103                    | 62,536            |
| Cuba *                             | 33,313            | 16,396         | 4,560          | 21,358           | -                 | -                   | -                   | 8,451                | -                 | 563                    | 125,696           |
| Ecuadorian registries              | 8,283             | 5,453          | 1,732          | 7,939            | 1,481             | 324                 | 1,489               | 6,330                | 859               | 340                    | 53,043            |
| Cuenca Ecuador                     | 319               | 216            | 114            | 474              | 71                | 26                  | 85                  | 375                  | 57                | 16                     | 2,869             |
| Guayaquil                          | 2,923             | 1,932          | 541            | 2,061            | 480               | 134                 | 489                 | 1,808                | 323               | 124                    | 16,388            |
| Loja                               | 333               | 349            | 94             | 362              | 107               | 16                  | 137                 | 327                  | 40                | 21                     | 3,091             |
| Manabí                             | 1,234             | 1,135          | 232            | 1,006            | 139               | 43                  | 150                 | 880                  | 169               | 68                     | 8,198             |
| Quito                              | 3,474             | 1,821          | 751            | 4,036            | 684               | 105                 | 628                 | 2,940                | 270               | 111                    | 22,497            |
| Guadeloupe *                       | 1,266             | 160            | 110            | 3,389            | 55                | 14                  | 115                 | 480                  | 9                 | 6                      | 7,787             |
| Martinique *                       | 2,279             | 399            | 191            | 6,480            | 182               | 20                  | 482                 | 1,257                | 29                | 10                     | 15,779            |
| Mexico (Childhood) †               | -                 | -              | -              | -                | -                 | 1,047               | -                   | -                    | 5,647             | 1,500                  | 8,194             |
| Peru (Lima)                        | 5,590             | 2,917          | -              | -                | -                 | -                   | 891                 | 3,653                | 268               | 112                    | 17,226            |
| Puerto Rico *                      | 18,807            | 2,458          | 1,728          | 29,855           | 1,458             | 222                 | 2,440               | 8,400                | 202               | 129                    | 101,613           |
| Uruguay *                          | -                 | 1,580          | 948            | 6,527            | -                 | -                   | -                   | -                    | -                 | -                      | 27,716            |
| <b>AMERICA (North)</b>             | <b>2,587,798</b>  | <b>163,517</b> | <b>312,954</b> | <b>2,703,952</b> | <b>251,888</b>    | <b>27,157</b>       | <b>508,562</b>      | <b>1,356,829</b>     | <b>29,995</b>     | <b>13,440</b>          | <b>14,320,034</b> |
| Canadian registries                | 237,321           | 16,054         | 31,395         | 256,736          | 28,186            | 2,196               | 49,474              | 139,370              | 2,712             | 1,139                  | 1,409,413         |
| Alberta                            | 27,939            | 2,327          | 3,304          | 32,025           | 3,040             | 300                 | 5,934               | 16,762               | 371               | 201                    | 164,125           |
| British Columbia                   | 41,961            | 2,457          | 5,162          | 44,951           | 4,342             | 318                 | 8,456               | 23,312               | 429               | 175                    | 244,678           |
| Manitoba                           | 11,414            | 755            | 1,510          | 10,359           | 1,172             | 95                  | 2,539               | 7,084                | 158               | 43                     | 67,356            |
| New Brunswick                      | 7,625             | 475            | 961            | 9,339            | 852               | 51                  | 1,452               | 4,635                | 76                | 32                     | 49,398            |
| Newfoundland & Labrador            | 5,101             | 437            | 563            | 5,927            | 606               | 39                  | 683                 | 2,322                | 47                | 22                     | 32,074            |
| Nova Scotia                        | 10,126            | 731            | 1,107          | 10,843           | 1,073             | 55                  | 1,552               | 5,373                | 95                | 33                     | 63,377            |
| Ontario                            | 122,092           | 8,133          | 17,412         | 129,977          | 16,014            | 1,241               | 26,587              | 73,000               | 1,408             | 575                    | 720,005           |
| Prince Edward Island               | 1,474             | 100            | 152            | 1,878            | 141               | 6                   | 303                 | 826                  | 11                | 6                      | 9,432             |
| Saskatchewan                       | 9,589             | 639            | 1,224          | 11,437           | 946               | 91                  | 1,968               | 6,056                | 117               | 52                     | 58,968            |
| US registries                      | 2,350,477         | 147,463        | 281,559        | 2,447,216        | 223,702           | 24,961              | 459,088             | 1,217,459            | 27,283            | 12,301                 | 12,910,621        |
| Alabama                            | 46,329            | 3,236          | 5,526          | 50,050           | 4,308             | 441                 | 7,376               | 21,721               | 427               | 211                    | 264,284           |
| Alaska                             | 4,938             | 316            | 524            | 4,605            | 528               | 59                  | 714                 | 2,231                | 74                | 47                     | 25,007            |
| Arkansas                           | 21,184            | 1,701          | 2,307          | 26,312           | 2,176             | 241                 | 3,928               | 11,169               | 217               | 120                    | 130,186           |
| California                         | 253,406           | 17,497         | 31,411         | 258,112          | 23,241            | 2,835               | 43,509              | 124,704              | 4,224             | 1,514                  | 1,331,999         |
| Greater Bay Area                   | 64,402            | 3,346          | 7,870          | 65,107           | 5,822             | 602                 | 10,857              | 33,406               | 850               | 361                    | 332,601           |
| Greater California                 | 175,010           | 11,358         | 21,411         | 169,510          | 17,368            | 2,093               | 31,394              | 85,751               | 2,969             | 1,099                  | 927,034           |
| Los Angeles                        | 79,105            | 6,962          | 10,618         | 77,299           | 6,692             | 873                 | 14,055              | 40,389               | 1,470             | 501                    | 409,577           |
| Colorado                           | 40,427            | 2,160          | 4,921          | 42,651           | 3,997             | 429                 | 6,923               | 20,068               | 561               | 246                    | 203,276           |
| Connecticut                        | 40,285            | 1,861          | 4,838          | 41,046           | 3,689             | 387                 | 7,635               | 21,644               | 384               | 204                    | 219,104           |
| Delaware                           | 9,495             | 598            | 1,066          | 11,365           | 817               | 104                 | 1,646               | 4,918                | 86                | 66                     | 55,117            |
| Florida                            | 180,236           | 12,789         | 22,941         | 203,262          | 17,842            | 1,708               | 44,811              | 98,031               | 1,691             | 787                    | 1,076,407         |
| Georgia                            | 83,576            | 5,872          | 9,627          | 88,429           | 7,658             | 1,009               | 15,356              | 40,580               | 960               | 499                    | 459,349           |
| Atlanta                            | 28,576            | 1,800          | 3,133          | 29,176           | 2,333             | 327                 | 4,524               | 13,413               | 349               | 193                    | 141,398           |
| Hawaii                             | 13,317            | 782            | 1,362          | 11,718           | 871               | 101                 | 2,584               | 5,853                | 152               | 68                     | 69,658            |
| Idaho                              | 13,125            | 671            | 1,570          | 15,730           | 1,409             | 163                 | 3,011               | 7,385                | 189               | 79                     | 73,943            |
| Indiana                            | 60,964            | 3,882          | 7,464          | 54,512           | 6,272             | 709                 | 12,375              | 32,908               | 750               | 340                    | 346,108           |
| Iowa                               | 30,684            | 1,601          | 4,171          | 31,932           | 3,323             | 365                 | 7,558               | 19,035               | 324               | 161                    | 182,804           |
| Kentucky                           | 42,843            | 3,086          | 5,046          | 42,059           | 4,526             | 506                 | 9,548               | 23,844               | 448               | 219                    | 269,263           |
| Louisiana                          | 42,433            | 3,220          | 4,441          | 50,891           | 3,698             | 503                 | 8,884               | 22,870               | 424               | 194                    | 254,391           |
| Maine                              | 14,477            | 691            | 1,712          | 15,168           | 1,434             | 120                 | 3,156               | 8,105                | 122               | 58                     | 83,632            |
| Massachusetts                      | 48,637            | 2,138          | 5,943          | 51,618           | 4,402             | 420                 | 7,637               | 23,508               | 468               | 229                    | 264,950           |
| Michigan                           | 93,981            | 5,306          | 11,843         | 114,079          | 9,413             | 971                 | 19,534              | 51,685               | 1,018             | 512                    | 550,144           |
| Detroit                            | 40,824            | 2,480          | 5,212          | 51,923           | 3,630             | 413                 | 9,430               | 23,039               | 407               | 223                    | 244,802           |
| Minnesota                          | 48,694            | 2,233          | 5,863          | 56,497           | 4,291             | 474                 | 10,596              | 27,866               | 594               | 291                    | 264,266           |
| Mississippi                        | 23,323            | 1,870          | 2,520          | 28,036           | 2,212             | 249                 | 4,220               | 11,927               | 244               | 119                    | 142,427           |
| Missouri                           | 43,425            | -              | -              | -                | -                 | -                   | -                   | -                    | -                 | -                      | 43,425            |
| Montana                            | 10,024            | 485            | 1,283          | 12,544           | 1,122             | 74                  | 2,305               | 5,457                | 93                | 43                     | 57,871            |
| Nebraska                           | 17,910            | 969            | 2,031          | 18,860           | 1,812             | 234                 | 3,481               | 10,109               | 194               | 110                    | 99,711            |

**Web-table 3: Population covered by participating registries (number of persons and % of national population) and number of patients diagnosed during 2000-2014 who were included in survival analyses, by continent, country and registry**

|                     | Breast<br>(women) | Cervix         | Ovary          | Prostate       | Brain<br>(adults) | Brain<br>(children) | Myeloid<br>(adults) | Lymphoid<br>(adults) | ALL<br>(children) | Lymphoma<br>(children) | Total            |
|---------------------|-------------------|----------------|----------------|----------------|-------------------|---------------------|---------------------|----------------------|-------------------|------------------------|------------------|
| New Hampshire       | 14,824            | 615            | 1,702          | 15,243         | 1,433             | 147                 | 2,804               | 7,739                | 144               | 80                     | 79,974           |
| New Jersey          | 93,196            | 6,136          | 12,031         | 106,155        | 8,797             | 953                 | 18,952              | 51,542               | 1,022             | 500                    | 526,669          |
| New Mexico          | 17,054            | 1,172          | 2,186          | 18,516         | 1,574             | 163                 | 3,484               | 8,758                | 284               | 94                     | 91,690           |
| New York            | 200,953           | 12,961         | 26,078         | 215,974        | 18,906            | 2,083               | 42,074              | 113,921              | 2,085             | 1,092                  | 1,077,828        |
| New York City       |                   |                |                |                |                   |                     |                     |                      |                   |                        |                  |
| North Carolina      | 93,082            | 5,377          | 10,470         | 96,317         | 8,575             | 928                 | 16,214              | 45,377               | 960               | 430                    | 505,054          |
| Ohio                | 118,912           | 7,030          | 13,796         | 117,117        | 11,426            | 1,269               | 18,836              | 58,929               | 1,147             | 543                    | 657,606          |
| Oklahoma            | 26,557            | 1,926          | 3,100          | 27,533         | 2,569             | 259                 | 4,809               | 13,344               | 309               | 131                    | 149,742          |
| Oregon              | 37,666            | 1,819          | 4,666          | 36,522         | 3,850             | 345                 | 5,556               | 17,903               | 431               | 186                    | 198,288          |
| Pennsylvania        | 142,126           | 7,878          | 18,292         | 147,278        | 13,714            | 1,276               | 30,736              | 78,678               | 1,333             | 569                    | 813,515          |
| Rhode Island        | 11,885            | 619            | 1,453          | 11,616         | 1,088             | 105                 | 2,151               | 6,172                | 112               | 54                     | 66,032           |
| South Carolina      | 45,903            | 2,906          | 4,953          | 50,324         | 4,321             | 401                 | 8,214               | 22,089               | 396               | 218                    | 257,044          |
| Tennessee           | 47,524            | 3,255          | 5,380          | 46,310         | 4,807             | 490                 | 7,258               | 22,871               | 518               | 220                    | 263,422          |
| Texas               | 178,119           | 15,396         | 21,145         | 174,441        | 18,761            | 2,803               | 41,943              | 97,142               | 3,214             | 1,389                  | 976,343          |
| Utah                | 16,849            | 910            | 2,235          | 22,697         | 2,176             | 382                 | 3,348               | 10,084               | 391               | 158                    | 93,552           |
| Vermont             | 6,550             | 272            | 757            | 6,625          | 695               | 35                  | 1,084               | 3,377                | 71                | 29                     | 35,639           |
| Washington          | 38,445            | 1,936          | 4,950          | 41,437         | 3,856             | 423                 | 7,744               | 20,315               | 420               | 180                    | 207,962          |
| Seattle             | 46,581            | 2,365          | 5,986          | 47,336         | 5,177             | 551                 | 10,350              | 25,438               | 497               | 230                    | 250,792          |
| West Virginia       | 19,279            | 1,474          | 2,566          | 20,134         | 2,100             | 199                 | 4,140               | 10,945               | 157               | 70                     | 122,752          |
| Wisconsin           | 53,430            | 2,518          | 6,815          | 57,737         | 5,526             | 548                 | 12,216              | 30,282               | 600               | 222                    | 294,989          |
| Wyoming             | 4,410             | 299            | 574            | 5,764          | 487               | 50                  | 738                 | 2,373                | 45                | 19                     | 25,198           |
| <b>ASIA</b>         | <b>726,968</b>    | <b>161,620</b> | <b>109,998</b> | <b>397,673</b> | <b>73,306</b>     | <b>8,513</b>        | <b>140,066</b>      | <b>293,307</b>       | <b>11,371</b>     | <b>6,380</b>           | <b>5,976,959</b> |
| Chinese registries  | 53,791            | 13,131         | 10,517         | 12,380         | 11,341            | 526                 | 12,171              | 19,388               | 498               | 213                    | 594,533          |
| Beijing             | 26,418            | 3,181          | 5,329          | 7,577          | 3,291             | 140                 | 5,134               | 9,185                | 239               | 63                     | 184,109          |
| Changle             | 479               | 356            | 119            | 79             | 229               | 12                  | 146                 | 274                  | 6                 | 3                      | 11,593           |
| Cixian              | 529               | 285            | 110            | 42             | 236               | 14                  | 218                 | 211                  | 16                | 13                     | 17,373           |
| Dafeng              | 854               | 793            | 215            | 130            | 447               | 7                   | 299                 | 56                   | -                 | -                      | 17,179           |
| Dalian              | 8,166             | 1,960          | 1,258          | 1,193          | 758               | 33                  | 885                 | 2,241                | 69                | 25                     | 61,256           |
| Donghai             | 1,002             | 393            | 169            | 95             | 415               | 26                  | 524                 | 465                  | 6                 | 7                      | 15,735           |
| Feicheng            | 1,150             | 166            | 249            | 131            | 401               | 19                  | 232                 | 177                  | 1                 | 3                      | 22,691           |
| Ganyu               | 997               | 265            | 155            | 96             | 522               | 24                  | 315                 | 398                  | 1                 | 8                      | 16,679           |
| Guanyun             | 1,020             | 337            | 204            | 101            | 454               | 22                  | 344                 | 409                  | 11                | 9                      | 14,754           |
| Haimen              | 1,832             | 811            | 548            | 534            | 786               | 32                  | 703                 | 1,193                | 16                | 11                     | 32,566           |
| Haining             | 1,176             | 363            | 236            | 318            | 327               | 10                  | 380                 | 557                  | 13                | 4                      | 13,909           |
| Jianhu              | 643               | 690            | 113            | 98             | 458               | 17                  | 299                 | 368                  | 6                 | 9                      | 25,358           |
| Jiashan             | 946               | 174            | 136            | 209            | 266               | 14                  | 185                 | 341                  | 7                 | 3                      | 11,466           |
| Jintan              | 708               | 298            | 141            | 128            | 171               | 2                   | 182                 | 215                  | 3                 | -                      | 13,800           |
| Lianyungang         | 1,042             | 373            | 200            | 177            | 198               | 10                  | 228                 | 365                  | 11                | 5                      | 10,041           |
| Linzhou             | 1,030             | 574            | 208            | 57             | 635               | 31                  | 360                 | 225                  | 1                 | 8                      | 25,578           |
| Qidong              | 1,843             | 589            | 321            | 558            | 853               | 21                  | 625                 | 1,257                | 11                | 6                      | 35,672           |
| Sihui               | 417               | 148            | 103            | 66             | 156               | 17                  | 147                 | 205                  | 11                | 5                      | 5,962            |
| Taixing             | 707               | 261            | 140            | 132            | 277               | 8                   | 259                 | 105                  | -                 | 1                      | 22,533           |
| Yangzhong           | 503               | 312            | 61             | 26             | 54                | -                   | 43                  | 60                   | -                 | 1                      | 10,233           |
| Zhongshan           | 2,329             | 802            | 502            | 633            | 407               | 67                  | 663                 | 1,081                | 70                | 29                     | 26,046           |
| Cyprus *            | 5,069             | 321            | 553            | 4,088          | 394               | 14                  | 555                 | 2,326                | 56                | 39                     | 21,610           |
| Hong Kong *         | 28,956            | 4,112          | -              | -              | -                 | -                   | -                   | -                    | -                 | -                      | 74,721           |
| Indian registries   | 812               | 753            | 172            | 183            | 162               | 18                  | 153                 | 272                  | 32                | 12                     | 4,774            |
| Guwahati            | -                 | 471            | -              | -              | -                 | -                   | -                   | -                    | -                 | -                      | 471              |
| Karunagappally      | 812               | 282            | 172            | 183            | 162               | 18                  | 153                 | 272                  | 32                | 12                     | 4,303            |
| Iran (Golestan)     | -                 | -              | -              | -              | -                 | -                   | -                   | -                    | -                 | -                      | 1,039            |
| Israel *            | 51,125            | 2,942          | 5,663          | 32,503         | 5,235             | 843                 | 8,375               | 30,911               | 754               | 758                    | 241,881          |
| Japanese registries | 184,372           | 30,606         | 31,244         | 168,505        | 15,007            | 1,293               | 37,845              | 85,640               | 1,438             | 508                    | 1,834,894        |
| Aichi               | 29,946            | 5,261          | 4,877          | 28,633         | 2,881             | 267                 | 7,487               | 15,314               | 291               | 90                     | 285,369          |
| Akita               | 2,846             | 339            | 476            | 3,188          | 259               | 10                  | 612                 | 407                  | 2                 | -                      | 33,564           |
| Ehime               | 5,409             | 844            | 841            | 5,215          | 586               | 29                  | 1,392               | 2,881                | 39                | 12                     | 50,516           |
| Fukui               | 2,219             | 356            | 393            | 2,310          | 208               | 24                  | 674                 | 1,360                | 17                | 10                     | 26,828           |
| Gunma               | 5,507             | 1,021          | 921            | 6,792          | 535               | 37                  | 1,864               | 2,889                | 43                | 7                      | 58,823           |
| Hiroshima           | 6,430             | 1,044          | 901            | 6,298          | 487               | 52                  | 1,543               | 3,333                | 38                | 23                     | 68,067           |
| Hyogo               | 11,821            | 2,231          | 2,154          | 12,609         | 1,234             | 82                  | 3,779               | 7,185                | 77                | 22                     | 127,335          |
| Ibaraki             | 8,380             | 1,538          | 1,448          | 8,176          | 714               | 51                  | 2,058               | 4,108                | 63                | 17                     | 79,698           |
| Kanagawa            | 42,993            | 7,089          | 7,565          | 38,691         | 2,352             | 162                 | 3,391               | 15,043               | 196               | 61                     | 380,845          |
| Miyagi              | 10,953            | 1,348          | 1,673          | 11,068         | 894               | 100                 | 2,305               | 4,979                | 100               | 22                     | 107,308          |
| Niigata             | 14,025            | 1,907          | 2,512          | 10,618         | 1,066             | 92                  | 3,249               | 7,050                | 130               | 50                     | 160,564          |
| Osaka               | 26,828            | 4,647          | 4,513          | 15,612         | 2,098             | 248                 | 4,734               | 11,882               | 293               | 139                    | 269,366          |
| Saga                | 2,422             | 535            | 426            | 2,639          | 254               | 26                  | 869                 | 1,703                | 29                | 12                     | 28,764           |
| Tochigi             | 6,851             | 1,347          | 1,224          | 7,505          | 643               | 58                  | 1,863               | 3,489                | 71                | 19                     | 67,368           |
| Yamagata            | 5,682             | 805            | 1,054          | 6,847          | 605               | 42                  | 1,462               | 3,018                | 31                | 21                     | 70,538           |
| Yamanashi           | 2,060             | 294            | 266            | 2,304          | 191               | 13                  | 563                 | 999                  | 18                | 3                      | 19,941           |
| Jordan *            | 11,584            | 579            | -              | 2,457          | 1,483             | 489                 | 1,917               | 6,511                | 681               | 480                    | 41,433           |
| Korea * ‡           | 179,520           | 58,663         | 28,076         | 83,892         | 17,701            | 2,333               | 42,322              | 70,594               | 3,389             | 2,049                  | 1,760,804        |
| Kuwait *            | 2,568             | 163            | 221            | 509            | 230               | 49                  | 346                 | 1,405                | 251               | 129                    | 8,484            |
| Malaysia (Penang)   | 4,606             | 1,046          | 805            | 915            | 289               | 84                  | 504                 | 1,244                | 156               | 65                     | 18,805           |
| Mongolia *          | 999               | -              | -              | -              | -                 | -                   | -                   | -                    | -                 | -                      | 999              |
| Qatar *             | 1,861             | 196            | 214            | 586            | 287               | 33                  | 489                 | 1,042                | 71                | 71                     | 7,642            |
| Singapore *         | 22,473            | 2,943          | 3,514          | 7,991          | 1,202             | 196                 | 3,339               | 7,187                | 388               | 167                    | 109,992          |
| Taiwan *            | 116,929           | 29,214         | 16,872         | 52,681         | 8,410             | 1,211               | 17,813              | 39,704               | 1,811             | 832                    | 858,683          |
| Thai registries     | 25,001            | 12,737         | 5,469          | 5,869          | 2,779             | 385                 | 5,177               | 8,486                | 605               | 217                    | 159,528          |
| Bangkok             | 12,738            | 4,965          | 2,596          | 3,264          | 1,512             | 170                 | 2,282               | 3,486                | 203               | 91                     | 69,577           |
| Khon Kaen           | 3,378             | 1,982          | 882            | 516            | 286               | 70                  | 964                 | 757                  | 153               | 16                     | 28,074           |
| Lampang             | 2,269             | 1,413          | 459            | 530            | 194               | 30                  | 492                 | 1,162                | 56                | 24                     | 19,059           |
| Lamphun             | 1,288             | 1,157          | 301            | 280            | 174               | 24                  | 237                 | 547                  | 19                | 17                     | 9,481            |
| Lopburi             | 2,471             | 1,595          | 533            | 518            | 286               | 28                  | 588                 | 891                  | 54                | 21                     | 15,455           |
| Songkhla            | 2,857             | 1,625          | 698            | 761            | 327               | 63                  | 614                 | 1,643                | 120               | 48                     | 17,882           |
| Turkish registries  | 37,302            | 4,214          | 6,678          | 25,114         | 8,786             | 1,039               | 9,060               | 18,597               | 1,241             | 840                    | 237,137          |
| Ankara              | 11,721            | 1,295          | 2,393          | 6,480          | 2,942             | 444                 | 1,964               | 6,157                | 336               | 371                    | 66,386           |
| Antalya             | 2,732             | 369            | 518            | 2,364          | 751               | 115                 | 1,267               | 1,653                | 138               | 55                     | 17,445           |
| Bursa               | 3,626             | 421            | 639            | 2,022          | 673               | 59                  | 833                 | 1,333                | 137               | 69                     | 23,104           |
| Edirne              | 603               | 57             | 114            | 399            | 122               | 7                   | 193                 | 344                  | 21                | 5                      | 4,748            |

**Web-table 3: Population covered by participating registries (number of persons and % of national population) and number of patients diagnosed during 2000-2014 who were included in survival analyses, by continent, country and registry**

|                                | Breast<br>(women) | Cervix         | Ovary          | Prostate         | Brain<br>(adults) | Brain<br>(children) | Myeloid<br>(adults) | Lymphoid<br>(adults) | ALL<br>(children) | Lymphoma<br>(children) | Total             |
|--------------------------------|-------------------|----------------|----------------|------------------|-------------------|---------------------|---------------------|----------------------|-------------------|------------------------|-------------------|
| Erzurum                        | 667               | 83             | 126            | 559              | 229               | 27                  | 213                 | 583                  | 63                | 43                     | 6,701             |
| Eskisehir                      | 1,467             | 109            | 243            | 967              | 286               | 15                  | -                   | 21                   | -                 | -                      | 7,840             |
| Izmir                          | 13,612            | 1,610          | 2,112          | 9,483            | 2,855             | 291                 | 3,520               | 6,534                | 424               | 238                    | 88,307            |
| Samsun                         | 1,760             | 154            | 320            | 1,581            | 542               | 57                  | 554                 | 1,211                | 82                | 34                     | 13,360            |
| Trabzon                        | 1,114             | 116            | 213            | 1,259            | 386               | 24                  | 516                 | 761                  | 40                | 25                     | 9,246             |
| <b>EUROPE</b>                  | <b>2,700,348</b>  | <b>267,986</b> | <b>399,675</b> | <b>2,355,249</b> | <b>297,032</b>    | <b>24,316</b>       | <b>436,684</b>      | <b>1,182,009</b>     | <b>29,544</b>     | <b>14,830</b>          | <b>14,991,316</b> |
| Austria *                      | 74,818            | 6,455          | 11,567         | 75,082           | 7,615             | -                   | 7,223               | 31,583               | -                 | -                      | 412,683           |
| Belarus (Childhood) †          | -                 | -              | -              | -                | -                 | 580                 | -                   | -                    | 740               | 367                    | 1,687             |
| Belgium *                      | 111,685           | 6,929          | 10,447         | 97,316           | 9,057             | 781                 | 19,790              | 42,772               | 720               | 549                    | 544,110           |
| Bulgaria *                     | 53,605            | 16,329         | 12,206         | 26,190           | -                 | -                   | 6,226               | 14,919               | 537               | 298                    | 273,868           |
| Croatia *                      | 35,323            | 5,279          | 7,138          | 22,066           | 7,515             | 403                 | 5,026               | 15,421               | 443               | 231                    | 222,776           |
| Czech Republic *               | 89,989            | 14,950         | 18,875         | 78,581           | 11,007            | 489                 | 9,734               | 36,974               | 531               | 279                    | 572,368           |
| Denmark *                      | 65,840            | 5,755          | 9,024          | 55,052           | 8,951             | 493                 | 8,951               | 27,756               | 574               | 233                    | 365,105           |
| Estonia *                      | 8,149             | 2,232          | 2,122          | 9,734            | 1,295             | 103                 | 1,512               | 4,193                | 93                | 47                     | 59,848            |
| Finland *                      | 62,282            | 2,318          | 8,101          | 66,706           | 5,953             | 503                 | 5,573               | 25,395               | 572               | 241                    | 294,268           |
| French registries              | 82,538            | 5,125          | 8,658          | 91,806           | 7,532             | 4,477               | 18,897              | 41,784               | 4,830             | 2,573                  | 460,927           |
| Bas-Rhin                       | 9,056             | 532            | 945            | 10,204           | 820               | -                   | 1,741               | 3,936                | -                 | -                      | 47,696            |
| Basse Normandie                | -                 | -              | -              | -                | -                 | -                   | 2,689               | 4,849                | -                 | -                      | 7,538             |
| Burgundy Digestive             | -                 | -              | -              | -                | -                 | -                   | -                   | -                    | -                 | -                      | 13,647            |
| Calvados                       | 5,801             | 342            | 650            | 6,130            | 466               | -                   | 160                 | 356                  | -                 | -                      | 17,941            |
| Calvados Digestive             | -                 | -              | -              | -                | -                 | -                   | -                   | -                    | -                 | -                      | 7,873             |
| Côte-d'Or Gynaecologic         | 4,220             | 265            | 318            | -                | -                 | -                   | -                   | -                    | -                 | -                      | 4,803             |
| Côte-d'Or Haematopoietic       | -                 | -              | -              | -                | -                 | -                   | 1,066               | 2,341                | -                 | -                      | 3,407             |
| Doubs                          | 3,965             | 302            | 490            | 5,656            | 371               | -                   | 981                 | 2,083                | -                 | -                      | 23,060            |
| Finistère                      | -                 | -              | -              | -                | -                 | -                   | -                   | -                    | -                 | -                      | 7,192             |
| Gironde CNS                    | -                 | -              | -              | -                | 1,187             | -                   | -                   | -                    | -                 | -                      | 1,187             |
| Gironde General                | 4,547             | 267            | 420            | 4,409            | -                 | -                   | -                   | -                    | -                 | -                      | 19,886            |
| Gironde Haematopoietic         | -                 | -              | -              | -                | -                 | -                   | 2,367               | 4,563                | -                 | -                      | 6,930             |
| Haut-Rhin                      | 6,047             | 387            | 651            | 7,357            | 433               | -                   | 1,071               | 2,791                | -                 | -                      | 32,543            |
| Haute-Vienne                   | 318               | 22             | 29             | 510              | 33                | -                   | 120                 | 172                  | -                 | -                      | 1,886             |
| Hérault                        | 8,964             | 708            | 880            | 10,479           | 719               | -                   | 1,806               | 3,745                | -                 | -                      | 46,621            |
| Isère                          | 9,453             | 509            | 1,004          | 10,795           | 921               | -                   | 1,814               | 4,249                | -                 | -                      | 48,968            |
| Lille Metro                    | 1,922             | 142            | 199            | 1,730            | 149               | -                   | 391                 | 670                  | -                 | -                      | 9,164             |
| Loire-Atlantique               | 15,946            | 756            | 1,525          | 19,341           | 1,367             | -                   | 2,616               | 8,124                | -                 | -                      | 83,792            |
| Manche                         | 4,215             | 280            | 619            | 5,370            | 393               | -                   | 153                 | 345                  | -                 | -                      | 21,555            |
| Somme                          | 4,856             | 366            | 573            | 5,191            | 332               | -                   | 1,011               | 2,013                | -                 | -                      | 24,265            |
| Tarn                           | 3,228             | 247            | 355            | 4,634            | 341               | -                   | 911                 | 1,547                | -                 | -                      | 19,093            |
| France Childhood Haem †        | -                 | -              | -              | -                | -                 | -                   | -                   | -                    | 4,830             | 2,573                  | 7,403             |
| France Childhood Solid †       | -                 | -              | -              | -                | -                 | 4,477               | -                   | -                    | -                 | -                      | 4,477             |
| German registries              | 300,626           | 24,302         | 38,064         | 284,771          | 27,683            | 691                 | 45,934              | 126,594              | 1,019             | 446                    | 1,621,312         |
| Brandenburg                    | 26,493            | 2,629          | 3,510          | 27,912           | 2,912             | -                   | 3,897               | 11,982               | -                 | -                      | 153,566           |
| Bremen                         | 7,803             | 614            | 1,100          | 6,277            | 679               | 35                  | 1,280               | 3,283                | 37                | 15                     | 42,545            |
| Hamburg                        | 20,097            | 1,538          | 2,663          | 15,524           | 1,615             | -                   | 3,402               | 8,364                | -                 | -                      | 99,646            |
| Lower Saxony                   | 72,334            | 4,830          | 8,503          | 72,788           | 5,496             | 246                 | 11,378              | 29,051               | 480               | 239                    | 381,262           |
| Mecklenburg-W. Pomerania       | 17,095            | 1,655          | 2,257          | 18,031           | 1,833             | -                   | 3,142               | 9,158                | -                 | -                      | 104,686           |
| Rhineland Palatinate           | 43,007            | 2,896          | 4,924          | 37,724           | 3,905             | 296                 | 4,741               | 13,517               | 332               | 151                    | 212,995           |
| Saarland                       | 10,872            | 937            | 1,494          | 9,460            | 971               | 31                  | 934                 | 4,129                | 39                | 5                      | 59,013            |
| Saxony                         | 46,088            | 4,417          | 6,621          | 45,996           | 5,360             | -                   | 9,388               | 23,031               | -                 | -                      | 273,740           |
| Schleswig-Holstein             | 33,076            | 2,286          | 3,829          | 29,559           | 2,499             | 83                  | 3,667               | 13,163               | 131               | 36                     | 161,182           |
| Thuringia                      | 23,761            | 2,500          | 3,163          | 21,500           | 2,413             | -                   | 4,105               | 10,916               | -                 | -                      | 132,677           |
| Gibraltar *                    | 169               | 10             | 14             | 62               | 11                | -                   | 4                   | 8                    | -                 | -                      | 533               |
| Greece (National Paediatric) † | -                 | -              | -              | -                | -                 | 237                 | -                   | -                    | 1,092             | 397                    | 1,726             |
| Iceland *                      | 2,743             | 225            | 276            | 3,083            | 348               | 35                  | 433                 | 1,167                | 31                | 11                     | 14,782            |
| Ireland *                      | 34,632            | 3,573          | 4,952          | 37,536           | 4,605             | 396                 | 6,250               | 16,806               | 461               | 194                    | 196,331           |
| Italian registries             | 250,204           | 13,394         | 31,025         | 196,256          | 28,325            | 1,613               | 49,653              | 121,301              | 2,022             | 1,273                  | 1,400,117         |
| Alto Adige                     | 3,369             | 229            | 464            | 3,814            | 376               | 13                  | 755                 | 1,723                | 43                | 17                     | 21,349            |
| Barletta-Andria-Trani          | 1,659             | 106            | 221            | 1,167            | 222               | 15                  | 662                 | 904                  | 25                | 7                      | 9,474             |
| Basilicata                     | 1,578             | 120            | 267            | 1,682            | 312               | 11                  | 797                 | 1,067                | 3                 | 9                      | 11,431            |
| Bergamo                        | 5,092             | 293            | 606            | 4,371            | 569               | 32                  | 767                 | 2,529                | 40                | 30                     | 30,280            |
| Biella-Vercelli                | 2,584             | 180            | 350            | 2,235            | 259               | -                   | 729                 | 1,352                | -                 | -                      | 15,227            |
| Brescia                        | 8,600             | 490            | 1,008          | 6,802            | 694               | 30                  | 699                 | 3,323                | 40                | 35                     | 44,521            |
| Brindisi                       | 842               | 41             | 103            | 556              | 149               | 9                   | 226                 | 434                  | 6                 | 7                      | 4,454             |
| Caserta                        | 1,429             | 84             | 206            | 926              | 212               | 29                  | 472                 | 708                  | 11                | 18                     | 8,499             |
| Catania-Messina-Enna           | 12,272            | 732            | 1,583          | 8,305            | 1,270             | 56                  | 3,072               | 6,444                | 145               | 68                     | 65,278            |
| Catanzaro                      | 1,103             | 90             | 157            | 1,003            | 178               | 8                   | 438                 | 772                  | 16                | 4                      | 7,141             |
| Como                           | 4,541             | 249            | 479            | 3,503            | 478               | 30                  | 728                 | 1,957                | 37                | 17                     | 24,014            |
| Cremona                        | 1,970             | 91             | 221            | 1,596            | 207               | 10                  | 364                 | 851                  | 4                 | 2                      | 11,215            |
| Ferrara                        | 4,559             | 191            | 527            | 3,507            | 498               | 19                  | 944                 | 2,079                | 7                 | 17                     | 25,735            |
| Friuli-Venezia-Giulia          | 13,240            | 647            | 1,434          | 11,723           | 1,215             | 47                  | 953                 | 5,320                | 71                | 50                     | 70,486            |
| Genoa                          | 9,165             | 616            | 1,212          | 7,119            | 1,002             | 43                  | 2,139               | 4,526                | 31                | 21                     | 51,701            |
| Latina                         | 3,722             | 258            | 485            | 2,573            | 504               | 30                  | 845                 | 1,849                | 38                | 31                     | 21,624            |
| Lecce                          | 3,032             | 215            | 483            | 2,227            | 511               | 29                  | 797                 | 1,506                | 30                | 16                     | 18,000            |
| Mantova                        | 4,062             | 162            | 495            | 2,802            | 355               | 10                  | 368                 | 1,798                | 19                | 16                     | 21,069            |
| Milano                         | 22,073            | 1,058          | 2,574          | 16,182           | 1,988             | 93                  | 4,087               | 9,764                | 139               | 73                     | 117,392           |
| Modena                         | 7,746             | 393            | 932            | 6,801            | 806               | 33                  | 1,492               | 3,892                | 48                | 32                     | 43,257            |
| Monza-Brianza                  | 4,417             | 194            | 466            | 2,916            | 490               | 24                  | 841                 | 1,902                | 28                | 14                     | 22,994            |
| Naples                         | 5,301             | 322            | 676            | 3,189            | 773               | 101                 | 1,277               | 2,816                | 77                | 50                     | 31,560            |
| Nuoro                          | 1,417             | 44             | 176            | 977              | 181               | 8                   | 419                 | 909                  | 12                | 16                     | 8,188             |
| Palermo                        | 7,341             | 463            | 978            | 5,072            | 1,006             | 78                  | 1,635               | 3,647                | 73                | 42                     | 40,743            |
| Parma                          | 5,894             | 268            | 763            | 4,538            | 766               | 36                  | 1,397               | 3,216                | 34                | 19                     | 35,239            |
| Pavia                          | 3,678             | 218            | 383            | 2,446            | 335               | 5                   | 293                 | 1,684                | 18                | 13                     | 19,639            |
| Piacenza                       | 1,615             | 71             | 159            | 1,315            | 190               | 7                   | 436                 | 922                  | 10                | 5                      | 9,655             |
| Ragusa                         | 3,185             | 198            | 493            | 2,317            | 472               | 47                  | 969                 | 1,709                | 31                | 23                     | 18,557            |
| Reggio Emilia                  | 5,651             | 215            | 630            | 4,021            | 643               | 33                  | 1,131               | 2,881                | 38                | 29                     | 30,093            |
| Romagna                        | 13,204            | 744            | 1,587          | 12,221           | 1,874             | 77                  | 3,404               | 7,120                | 79                | 61                     | 81,179            |
| Salerno                        | 5,447             | 393            | 901            | 4,052            | 894               | 49                  | 1,499               | 3,381                | 67                | 51                     | 33,610            |
| Sassari                        | 4,050             | 205            | 415            | 2,586            | 417               | 22                  | 659                 | 1,985                | 32                | 20                     | 20,063            |

**Web-table 3: Population covered by participating registries (number of persons and % of national population) and number of patients diagnosed during 2000-2014 who were included in survival analyses, by continent, country and registry**

|                              | Breast<br>(women) | Cervix         | Ovary          | Prostate         | Brain<br>(adults) | Brain<br>(children) | Myeloid<br>(adults) | Lymphoid<br>(adults) | ALL<br>(children) | Lymphoma<br>(children) | Total             |
|------------------------------|-------------------|----------------|----------------|------------------|-------------------|---------------------|---------------------|----------------------|-------------------|------------------------|-------------------|
| Siracusa                     | 2,967             | 211            | 418            | 2,090            | 386               | 15                  | 576                 | 1,414                | 30                | 15                     | 16,359            |
| Sondrio                      | 1,675             | 108            | 222            | 1,663            | 164               | 9                   | 183                 | 852                  | 14                | 5                      | 10,330            |
| Taranto                      | 2,819             | 142            | 387            | 1,840            | 391               | 27                  | 757                 | 1,304                | 23                | 22                     | 14,910            |
| Trapani                      | 2,167             | 141            | 329            | 1,447            | 329               | 17                  | 539                 | 1,132                | 27                | 17                     | 12,100            |
| Trento                       | 4,146             | 199            | 532            | 2,784            | 379               | 28                  | 483                 | 1,859                | 43                | 13                     | 21,356            |
| Turin                        | 10,833            | 550            | 1,365          | 9,024            | 1,082             | -                   | 1,885               | 5,384                | -                 | -                      | 59,247            |
| Tuscany                      | 10,400            | 568            | 1,322          | 7,683            | 1,306             | 68                  | 2,596               | 4,902                | 66                | 48                     | 59,734            |
| Umbria                       | 9,828             | 566            | 1,360          | 9,089            | 1,229             | 36                  | 2,662               | 5,262                | 75                | 40                     | 61,904            |
| Varese                       | 9,645             | 462            | 1,113          | 8,943            | 981               | 50                  | 932                 | 4,440                | 74                | 53                     | 52,026            |
| Veneto                       | 20,600            | 826            | 2,395          | 16,072           | 2,086             | 57                  | 3,369               | 9,154                | 109               | 94                     | 110,047           |
| Viterbo                      | 1,286             | 41             | 148            | 1,077            | 146               | 9                   | 377                 | 628                  | 7                 | 4                      | 7,723             |
| Piedmont Childhood           | -                 | -              | -              | -                | -                 | 263                 | -                   | -                    | 302               | 149                    | 714               |
| Latvia *                     | 13,020            | 3,148          | 3,842          | 10,674           | 1,415             | 100                 | 1,749               | 2,679                | 147               | -                      | 71,082            |
| Lithuania *                  | 17,699            | 6,318          | 5,452          | 30,156           | 2,942             | 136                 | 4,850               | 9,741                | 250               | 106                    | 139,475           |
| Malta *                      | 3,523             | 136            | 547            | 2,069            | 315               | 24                  | 492                 | 1,383                | 35                | 20                     | 15,518            |
| Netherlands *                | 198,074           | 10,317         | 19,252         | 142,578          | 17,261            | 1,428               | 30,256              | 78,420               | 1,588             | 755                    | 987,029           |
| Norway *                     | 43,349            | 4,458          | 7,207          | 57,657           | 5,647             | 484                 | 8,374               | 24,389               | 511               | 255                    | 277,991           |
| Poland *                     | 220,036           | 48,857         | 53,462         | 131,099          | 37,794            | 2,071               | 21,008              | 94,159               | 2,505             | 1,308                  | 1,344,837         |
| Greater Poland               | 21,104            | 3,811          | 4,766          | 12,004           | 3,124             | 248                 | 1,902               | 8,631                | 291               | 154                    | 120,099           |
| Holy Cross                   | 6,597             | 1,610          | 1,711          | 5,200            | 1,518             | 66                  | 1,096               | 3,967                | 101               | 52                     | 48,965            |
| Kuiavia-Pomerania            | 13,010            | 2,627          | 3,236          | 6,951            | 2,203             | 123                 | 1,169               | 5,366                | 163               | 80                     | 76,963            |
| Lesser Poland                | 17,739            | 3,981          | 4,924          | 11,487           | 2,949             | 211                 | 1,524               | 8,133                | 259               | 141                    | 112,639           |
| Łódź                         | 16,004            | 3,375          | 4,074          | 7,446            | 2,867             | 132                 | 1,914               | 7,034                | 73                | 49                     | 92,164            |
| Lower Silesia                | 18,559            | 4,096          | 4,277          | 9,248            | 3,590             | 115                 | 1,718               | 7,085                | -                 | 82                     | 114,565           |
| Lublin                       | 11,251            | 2,601          | 3,144          | 7,628            | 2,314             | 142                 | 1,408               | 6,262                | 181               | 80                     | 73,444            |
| Lubush                       | 5,508             | 1,442          | 1,239          | 3,056            | 909               | 65                  | 496                 | 1,933                | 57                | 26                     | 33,469            |
| Mazovia                      | 31,330            | 6,316          | 6,150          | 18,407           | 4,828             | 227                 | 1,881               | 11,399               | 365               | 200                    | 170,070           |
| Opole                        | 5,557             | 1,338          | 1,464          | 3,061            | 837               | 52                  | 510                 | 2,211                | 61                | 22                     | 35,555            |
| Podlaha                      | 5,793             | 1,634          | 1,616          | 3,981            | 1,158             | 57                  | 625                 | 2,646                | 109               | 35                     | 37,464            |
| Pomerania                    | 13,557            | 3,363          | 3,148          | 9,379            | 1,810             | 94                  | 1,389               | 5,755                | 153               | 70                     | 83,629            |
| Silesia                      | 26,998            | 6,106          | 6,995          | 17,032           | 4,817             | 216                 | 2,692               | 11,155               | 308               | 122                    | 171,619           |
| Subcarpathia                 | 9,142             | 2,224          | 2,869          | 7,572            | 2,214             | 136                 | 1,418               | 6,126                | 173               | 79                     | 68,809            |
| Varmia-Mazuria               | 7,550             | 1,931          | 1,862          | 4,035            | 1,298             | 87                  | 551                 | 2,967                | 105               | 58                     | 48,037            |
| West Pomerania               | 10,337            | 2,402          | 1,987          | 4,612            | 1,358             | 100                 | 715                 | 3,489                | 106               | 58                     | 57,346            |
| Portugal *                   | 69,599            | 9,013          | 6,532          | 64,886           | 7,348             | 549                 | 9,414               | 32,024               | 627               | 476                    | 386,853           |
| Azores                       | 1,529             | 234            | 206            | 1,657            | 182               | 20                  | 363                 | 864                  | 18                | 20                     | 9,717             |
| Portugal Central             | 8,323             | 1,029          | 688            | 8,713            | 585               | 26                  | 983                 | 3,437                | 81                | 73                     | 44,488            |
| Portugal North               | 16,527            | 2,468          | 1,433          | 15,911           | 1,930             | 119                 | 1,919               | 7,058                | 168               | 149                    | 99,591            |
| Portugal South               | 43,220            | 5,282          | 4,205          | 38,605           | 4,651             | 384                 | 6,149               | 20,665               | 360               | 234                    | 233,057           |
| Romania (Cluj)               | 2,205             | 1,004          | 460            | 1,301            | 291               | 19                  | 482                 | 969                  | 21                | 10                     | 14,060            |
| Russian registries ‡         | 41,903            | 10,897         | 10,628         | 20,346           | 4,449             | 327                 | 3,190               | 9,209                | 320               | 207                    | 245,591           |
| Arkhangelsk                  | 5,978             | 1,773          | 1,759          | 2,669            | 936               | 71                  | 611                 | 2,310                | 77                | 50                     | 46,280            |
| Karelia                      | 3,927             | 1,428          | 1,000          | 1,451            | 464               | 33                  | 593                 | 823                  | 2                 | 21                     | 25,277            |
| Omsk                         | 7,739             | 2,193          | 1,991          | 3,839            | 569               | 62                  | -                   | -                    | -                 | -                      | 37,585            |
| Samara                       | 20,620            | 4,126          | 4,959          | 10,367           | 2,091             | 147                 | 1,986               | 6,076                | 241               | 136                    | 116,931           |
| Tomsk                        | 3,639             | 1,377          | 919            | 2,020            | 389               | 14                  | -                   | -                    | -                 | -                      | 19,518            |
| Slovakia *                   | 23,698            | 6,170          | 5,207          | 14,376           | 3,695             | 323                 | 4,466               | 11,821               | 304               | 179                    | 156,122           |
| Slovenia *                   | 15,822            | 2,281          | 2,750          | 14,932           | 1,943             | 114                 | 3,026               | 7,498                | 122               | 88                     | 102,970           |
| Spanish registries           | 56,759            | 5,023          | 7,710          | 63,237           | 8,685             | 1,521               | 13,483              | 31,782               | 1,917             | 1,115                  | 376,759           |
| Basque Country               | 17,753            | 1,208          | 2,457          | 21,857           | 2,917             | 113                 | 4,329               | 10,133               | 152               | 78                     | 125,628           |
| Canaries                     | 9,132             | 1,097          | 1,107          | 9,312            | 1,368             | 76                  | 1,513               | 5,423                | 93                | 66                     | 54,085            |
| Girona                       | 5,322             | 375            | 641            | 5,872            | 795               | 54                  | 1,616               | 3,010                | 55                | 37                     | 34,611            |
| Granada                      | 5,067             | 445            | 771            | 4,800            | 833               | 59                  | 1,081               | 2,550                | 60                | 40                     | 31,636            |
| Mallorca                     | 4,838             | 583            | 678            | 5,426            | 615               | 45                  | 1,376               | 2,647                | 55                | 29                     | 31,994            |
| Murcia                       | 6,361             | 689            | 963            | 6,843            | 880               | 64                  | 1,720               | 3,752                | 104               | 47                     | 42,079            |
| Navarra                      | 3,576             | 195            | 532            | 4,063            | 671               | 32                  | 698                 | 1,858                | 37                | 22                     | 23,875            |
| Tarragona                    | 4,710             | 431            | 561            | 5,064            | 606               | 37                  | 1,150               | 2,409                | 43                | 38                     | 29,734            |
| Spain Childhood              | -                 | -              | -              | -                | -                 | 778                 | -                   | -                    | 1,005             | 566                    | 2,349             |
| Valencia Childhood           | -                 | -              | -              | -                | -                 | 263                 | -                   | -                    | 313               | 192                    | 768               |
| Sweden *                     | 102,483           | 6,816          | 12,132         | 139,051          | 9,327             | 761                 | 14,280              | 43,784               | 926               | 309                    | 544,531           |
| Swiss registries             | 39,262            | 1,858          | 4,964          | 40,528           | 4,102             | 565                 | 7,175               | 18,923               | 733               | 324                    | 212,695           |
| Basel                        | 2,401             | 117            | 242            | 2,750            | 198               | -                   | 190                 | 992                  | -                 | -                      | 12,224            |
| Fribourg                     | 1,796             | 51             | 179            | 1,882            | 168               | -                   | 312                 | 788                  | -                 | -                      | 9,144             |
| Geneva                       | 5,212             | 159            | 599            | 4,171            | 459               | -                   | 951                 | 2,185                | -                 | -                      | 24,836            |
| Graubünden-Glarus            | 2,292             | 149            | 347            | 3,068            | 290               | -                   | 526                 | 1,221                | -                 | -                      | 14,002            |
| Neuchâtel                    | 2,054             | 63             | 282            | 1,774            | 167               | -                   | 279                 | 856                  | -                 | -                      | 10,608            |
| St Gallen-Appenzell          | 4,718             | 311            | 734            | 6,040            | 625               | -                   | 954                 | 2,568                | -                 | -                      | 28,881            |
| Ticino                       | 4,168             | 219            | 543            | 3,166            | 377               | -                   | 763                 | 2,139                | -                 | -                      | 22,251            |
| Valais                       | 3,363             | 137            | 456            | 3,681            | 367               | -                   | 645                 | 1,609                | -                 | -                      | 18,482            |
| Zürich                       | 13,258            | 652            | 1,582          | 13,996           | 1,451             | -                   | 2,555               | 6,565                | -                 | -                      | 70,645            |
| Switzerland Childhood †      | -                 | -              | -              | -                | -                 | 565                 | -                   | -                    | 733               | 324                    | 1,622             |
| United Kingdom *             | 680,313           | 44,814         | 97,061         | 578,118          | 71,921            | 5,093               | 129,233             | 308,555              | 5,873             | 2,539                  | 3,673,362         |
| England                      | 567,858           | 36,380         | 79,625         | 488,461          | 59,346            | 4,241               | 110,995             | 256,050              | 4,925             | 2,166                  | 3,035,060         |
| Northern Ireland             | 16,592            | 1,387          | 2,574          | 13,519           | 2,000             | 193                 | 4,179               | 7,961                | 176               | 80                     | 93,719            |
| Scotland                     | 59,967            | 4,622          | 9,440          | 42,316           | 6,502             | 399                 | 10,502              | 27,851               | 493               | 180                    | 345,391           |
| Wales                        | 35,896            | 2,425          | 5,422          | 33,822           | 4,073             | 260                 | 3,557               | 16,693               | 279               | 113                    | 199,192           |
| <b>OCEANIA</b>               | <b>232,346</b>    | <b>13,537</b>  | <b>25,841</b>  | <b>290,176</b>   | <b>25,294</b>     | <b>1,713</b>        | <b>54,647</b>       | <b>129,127</b>       | <b>3,078</b>      | <b>1,253</b>           | <b>1,483,573</b>  |
| Australia *                  | 193,134           | 11,065         | 21,124         | 247,000          | 21,569            | 1,484               | 46,955              | 108,727              | 2,565             | 1,036                  | 1,244,350         |
| Australian Capital Territory | 3,053             | 134            | 308            | 3,190            | 278               | 30                  | 522                 | 1,390                | 39                | 20                     | 15,606            |
| New South Wales              | 55,431            | 3,212          | 6,219          | 76,030           | 5,773             | 319                 | 12,663              | 31,146               | 727               | 286                    | 367,212           |
| Northern Territory           | 1,026             | 144            | 102            | 993              | 103               | 13                  | 195                 | 472                  | 17                | 15                     | 6,236             |
| Queensland                   | 42,903            | 2,827          | 4,633          | 52,791           | 5,383             | 518                 | 11,081              | 23,027               | 603               | 215                    | 283,124           |
| South Australia              | 15,360            | 716            | 1,662          | 20,326           | 1,621             | 68                  | 3,465               | 9,886                | 173               | 69                     | 98,633            |
| Tasmania                     | 4,697             | 269            | 528            | 6,628            | 566               | 47                  | 862                 | 2,793                | 46                | 17                     | 32,378            |
| Victoria                     | 51,126            | 2,497          | 5,811          | 62,028           | 5,780             | 358                 | 13,895              | 29,393               | 719               | 284                    | 319,030           |
| Western Australia            | 19,538            | 1,266          | 1,861          | 25,014           | 2,065             | 131                 | 4,272               | 10,620               | 241               | 130                    | 122,131           |
| New Zealand *                | 39,212            | 2,472          | 4,717          | 43,176           | 3,725             | 229                 | 7,692               | 20,400               | 513               | 217                    | 239,223           |
| <b>Total</b>                 | <b>6,422,553</b>  | <b>660,744</b> | <b>865,501</b> | <b>5,864,878</b> | <b>656,659</b>    | <b>66,814</b>       | <b>1,151,226</b>    | <b>3,011,054</b>     | <b>87,351</b>     | <b>41,196</b>          | <b>37,513,025</b> |

Web-table 3.1 Number of patients included in survival analyses, by continent, country and registry: patients diagnosed during 2000-2004

Back

|                                    | Oesophagus    | Stomach       | Colon          | Rectum         | Liver         | Pancreas       | Lung           | Melanoma<br>of skin |
|------------------------------------|---------------|---------------|----------------|----------------|---------------|----------------|----------------|---------------------|
| <b>AFRICA</b>                      | <b>1,067</b>  | <b>298</b>    | <b>321</b>     | <b>214</b>     | <b>140</b>    | <b>61</b>      | <b>612</b>     | <b>48</b>           |
| Algerian registries                | 12            | 270           | 292            | 182            | 49            | 40             | 505            | 28                  |
| Annaba                             | 4             | 72            | 63             | 36             | 13            | 27             | 96             | 11                  |
| Sétif                              | 8             | 198           | 229            | 146            | 36            | 13             | 409            | 17                  |
| Tlemcen                            | -             | -             | -              | -              | -             | -              | -              | -                   |
| Mali (Bamako)                      | -             | -             | -              | -              | -             | -              | -              | -                   |
| Mauritius *                        | -             | -             | -              | -              | -             | -              | -              | -                   |
| Morocco (Casablanca)               | -             | -             | -              | -              | -             | -              | -              | -                   |
| Nigeria (Ibadan)                   | -             | -             | -              | -              | -             | -              | -              | -                   |
| South Africa (Eastern Cape)        | 1,055         | 28            | 29             | 32             | 91            | 21             | 107            | 20                  |
| <b>AMERICA (Central and South)</b> | <b>4,298</b>  | <b>18,612</b> | <b>22,495</b>  | <b>6,691</b>   | <b>1,859</b>  | <b>4,156</b>   | <b>13,846</b>  | <b>2,106</b>        |
| Argentinian registries             | 212           | 387           | 785            | 266            | 98            | 199            | 717            | 183                 |
| Chubut                             | -             | -             | -              | -              | -             | -              | -              | -                   |
| Córdoba                            | 55            | 93            | 232            | 78             | 39            | 71             | 244            | 65                  |
| Mendoza                            | 157           | 294           | 553            | 188            | 59            | 128            | 473            | 118                 |
| Tierra del Fuego                   | -             | -             | -              | -              | -             | -              | -              | -                   |
| Argentina (Childhood) †            | -             | -             | -              | -              | -             | -              | -              | -                   |
| Brazilian registries               | 2,624         | 6,727         | 7,206          | 3,699          | 237           | 2,226          | 1,609          | 459                 |
| Aracaju                            | 28            | 163           | 153            | 76             | 51            | 46             | 243            | 53                  |
| Cuiabá                             | -             | -             | -              | -              | -             | -              | -              | -                   |
| Curitiba                           | 336           | 727           | 855            | 376            | 122           | 212            | 798            | 378                 |
| Goiânia                            | 159           | -             | -              | -              | 60            | 94             | 492            | -                   |
| Jaú                                | 49            | 79            | 109            | 25             | 4             | 31             | 76             | 28                  |
| São Paulo                          | 2,052         | 5,758         | 6,089          | 3,222          | -             | 1,843          | -              | -                   |
| Chilean registries                 | 197           | 809           | 271            | 140            | 84            | 140            | 386            | 94                  |
| Antofagasta                        | 23            | 107           | 59             | 28             | 22            | 25             | 215            | 20                  |
| Biobio                             | 55            | 232           | 64             | 30             | 18            | 29             | 45             | 18                  |
| Concepción                         | -             | -             | -              | -              | -             | -              | -              | -                   |
| Los Rios                           | 119           | 470           | 148            | 82             | 44            | 86             | 126            | 56                  |
| Colombian registries               | 203           | 2,213         | 854            | 487            | 241           | 337            | 1,108          | 410                 |
| Bucaramanga                        | -             | 237           | -              | -              | -             | -              | -              | 32                  |
| Cali                               | 150           | 1,510         | 733            | 402            | 205           | 278            | 987            | 316                 |
| Manizales                          | 15            | 146           | 60             | 43             | 10            | 18             | 75             | 29                  |
| Pasto                              | 38            | 320           | 61             | 42             | 26            | 41             | 46             | 33                  |
| Costa Rica *                       | 119           | 2,096         | 1,011          | 302            | 259           | 291            | 565            | 299                 |
| Cuba *                             | -             | 2,849         | 6,145          | -              | -             | -              | 6,429          | -                   |
| Ecuadorian registries              | 100           | 1,539         | 481            | 222            | 223           | 202            | 472            | 197                 |
| Cuenca Ecuador                     | 4             | 98            | 30             | 11             | 20            | 30             | 30             | 9                   |
| Guayaquil                          | -             | -             | -              | -              | -             | -              | -              | -                   |
| Loja                               | 9             | 222           | 42             | 14             | 23            | 20             | 36             | 20                  |
| Manabí                             | 22            | 422           | 76             | 46             | 32            | 31             | 107            | 11                  |
| Quito                              | 65            | 797           | 333            | 151            | 148           | 121            | 299            | 157                 |
| Guadeloupe *                       | -             | -             | -              | -              | -             | -              | -              | -                   |
| Martinique *                       | 101           | 356           | 329            | 124            | 77            | 138            | 212            | 64                  |
| Mexico (Childhood) †               | -             | -             | -              | -              | -             | -              | -              | -                   |
| Peru (Lima)                        | -             | -             | -              | -              | -             | -              | -              | -                   |
| Puerto Rico *                      | 742           | 1,636         | 5,413          | 1,451          | 640           | 623            | 2,348          | 400                 |
| Uruguay *                          | -             | -             | -              | -              | -             | -              | -              | -                   |
| <b>AMERICA (North)</b>             | <b>64,152</b> | <b>97,436</b> | <b>547,573</b> | <b>156,206</b> | <b>64,189</b> | <b>141,231</b> | <b>879,390</b> | <b>206,297</b>      |
| Canadian registries                | 5,251         | 10,632        | 51,050         | 17,580         | 4,738         | 11,619         | 70,501         | 17,389              |
| Alberta                            | 518           | 1,166         | 5,179          | 1,983          | 630           | 1,448          | 7,486          | 2,004               |
| British Columbia                   | 1,048         | 1,727         | 8,173          | 3,267          | 1,077         | 2,183          | 12,120         | 3,241               |
| Manitoba                           | 222           | 573           | 2,799          | 931            | 214           | 645            | 3,948          | 613                 |
| New Brunswick                      | 181           | 380           | 1,888          | 445            | 87            | 497            | 3,047          | 553                 |
| Newfoundland & Labrador            | 84            | 377           | 1,462          | 532            | 45            | 108            | 1,328          | 285                 |
| Nova Scotia                        | 253           | 472           | 2,720          | 935            | 123           | 558            | 3,858          | 936                 |
| Ontario                            | 2,699         | 5,442         | 26,087         | 8,543          | 2,429         | 5,577          | 35,154         | 9,032               |
| Prince Edward Island               | 37            | 57            | 361            | 138            | 22            | 75             | 500            | 137                 |
| Saskatchewan                       | 209           | 438           | 2,381          | 806            | 111           | 528            | 3,060          | 588                 |
| US registries                      | 58,901        | 86,804        | 496,523        | 138,626        | 59,451        | 129,612        | 808,889        | 188,908             |
| Alabama                            | 1,096         | 1,471         | 9,259          | 2,356          | 877           | 2,268          | 16,966         | 3,071               |
| Alaska                             | 135           | 171           | 819            | 334            | 170           | 222            | 1,409          | 317                 |
| Arkansas                           | 539           | 913           | 5,821          | 1,680          | 507           | 1,415          | 12,097         | 1,728               |
| California                         | 6,138         | 12,737        | 54,548         | 16,944         | 10,446        | 16,062         | 83,896         | 28,452              |
| Greater Bay Area                   | 1,176         | 2,598         | 10,859         | 3,246          | 2,350         | 3,074          | 15,529         | 4,666               |
| Greater California                 | 3,487         | 5,977         | 29,145         | 9,058          | 5,003         | 8,902          | 49,057         | 17,866              |
| Los Angeles                        | 1,470         | 4,160         | 14,315         | 4,626          | 3,092         | 4,087          | 19,096         | 5,656               |
| Colorado                           | 868           | 1,030         | 6,591          | 2,063          | 857           | 1,859          | 9,467          | 4,080               |
| Connecticut                        | 1,058         | 1,649         | 8,336          | 2,326          | 868           | 2,255          | 12,296         | 3,818               |
| Delaware                           | 255           | 290           | 1,821          | 488            | 178           | 454            | 3,206          | 763                 |
| Florida                            | 4,893         | 7,061         | 43,125         | 10,849         | 4,632         | 10,848         | 73,323         | 16,977              |
| Georgia                            | 1,882         | 2,346         | 14,340         | 4,076          | 1,422         | 3,668          | 26,096         | 7,163               |
| Atlanta                            | 508           | 722           | 4,148          | 1,170          | 491           | 1,044          | 6,445          | 2,682               |

Web-table 3.1 Number of patients included in survival analyses, by continent, country and registry: patients diagnosed during 2000-2004

|                     | Oesophagus    | Stomach        | Colon          | Rectum        | Liver          | Pancreas      | Lung           | Melanoma<br>of skin |
|---------------------|---------------|----------------|----------------|---------------|----------------|---------------|----------------|---------------------|
| Hawaii              | 237           | 886            | 2,635          | 803           | 573            | 762           | 3,311          | 1,017               |
| Idaho               | 295           | 331            | 2,103          | 677           | 180            | 649           | 3,396          | 1,350               |
| Indiana             | 1,544         | 1,660          | 13,307         | 3,751         | 1,149          | 3,336         | 23,365         | 4,840               |
| Iowa                | 827           | 890            | 7,667          | 2,071         | 523            | 1,837         | 10,800         | 2,649               |
| Kentucky            | 1,055         | 1,232          | 9,682          | 2,890         | 801            | 2,159         | 20,855         | 4,213               |
| Louisiana           | 1,061         | 1,749          | 9,624          | 2,726         | 1,213          | 2,668         | 16,764         | 2,334               |
| Maine               | 460           | 493            | 3,354          | 964           | 271            | 881           | 5,826          | 1,449               |
| Massachusetts       | 2,139         | 2,709          | 15,397         | 4,336         | 1,678          | 3,806         | 23,260         | 6,744               |
| Michigan            | 2,829         | 3,448          | 20,550         | 5,498         | 2,456          | 5,852         | 36,365         | 8,561               |
| Detroit             | 1,088         | 1,723          | 8,648          | 2,278         | 1,135          | 2,601         | 15,303         | 3,146               |
| Minnesota           | 1,167         | 1,399          | 9,499          | 2,778         | 733            | 2,094         | 13,421         | 4,377               |
| Mississippi         | 423           | 566            | 3,480          | 970           | 318            | 795           | 6,268          | 1,108               |
| Missouri            | -             | -              | -              | -             | -              | -             | -              | -                   |
| Montana             | 206           | 314            | 1,823          | 598           | 131            | 472           | 3,097          | 816                 |
| Nebraska            | 415           | 492            | 4,049          | 1,154         | 301            | 882           | 5,531          | 1,336               |
| New Hampshire       | 408           | 368            | 2,655          | 772           | 216            | 687           | 4,354          | 1,683               |
| New Jersey          | 2,250         | 4,091          | 20,775         | 5,437         | 2,368          | 5,321         | 28,760         | 7,902               |
| New Mexico          | 365           | 635            | 2,901          | 924           | 534            | 807           | 3,991          | 1,543               |
| New York            | 4,836         | 9,327          | 43,582         | 11,546        | 5,854          | 11,978        | 61,613         | -                   |
| New York City       | 1,720         | 4,535          | 16,384         | 4,281         | 3,160          | 4,568         | 19,714         | -                   |
| North Carolina      | 1,965         | 2,421          | 15,925         | 4,431         | 1,584          | 4,150         | 28,929         | 6,488               |
| Ohio                | 3,198         | 3,669          | 25,672         | 6,923         | 2,230          | 6,115         | 43,733         | 9,143               |
| Oklahoma            | 775           | 1,014          | 7,523          | 1,977         | 764            | 1,890         | 14,488         | 2,598               |
| Oregon              | 995           | 1,041          | 6,901          | 2,123         | 759            | 1,931         | 12,355         | 4,180               |
| Pennsylvania        | 3,875         | 5,246          | 33,422         | 9,098         | 3,364          | 8,327         | 49,480         | 10,640              |
| Rhode Island        | 333           | 568            | 2,691          | 715           | 351            | 672           | 4,238          | 1,250               |
| South Carolina      | 1,145         | 1,498          | 8,766          | 2,393         | 785            | 2,184         | 15,131         | 3,732               |
| Tennessee           | 1,189         | 1,483          | 11,218         | 2,863         | 894            | 2,533         | 21,591         | 3,700               |
| Texas               | 3,779         | 6,484          | 34,957         | 9,641         | 5,965          | 9,153         | 58,326         | 13,331              |
| Utah                | 269           | 449            | 2,555          | 857           | 235            | 771           | 2,426          | 1,964               |
| Vermont             | 164           | 183            | 1,271          | 385           | 108            | 325           | 2,054          | 847                 |
| Washington          | 1,484         | 1,878          | 10,556         | 3,321         | 1,544          | 3,293         | 19,094         | 6,669               |
| Seattle             | 991           | 1,326          | 7,043          | 2,252         | 1,152          | 2,207         | 12,884         | 4,610               |
| West Virginia       | 565           | 666            | 5,096          | 1,493         | 393            | 1,019         | 9,430          | 1,649               |
| Wisconsin           | 1,629         | 1,819          | 11,319         | 3,145         | 1,142          | 2,975         | 16,575         | 3,940               |
| Wyoming             | 155           | 127            | 908            | 250           | 77             | 237           | 1,306          | 486                 |
| <b>ASIA</b>         | <b>44,865</b> | <b>243,061</b> | <b>143,210</b> | <b>81,316</b> | <b>167,669</b> | <b>42,647</b> | <b>210,793</b> | <b>7,533</b>        |
| Chinese registries  | 11,570        | 14,754         | 4,196          | 3,915         | 11,660         | 2,403         | 17,182         | 201                 |
| Beijing             | 1,203         | 2,513          | 2,200          | 1,593         | 2,248          | 877           | 6,679          | 90                  |
| Changle             | 137           | 821            | 55             | 60            | 315            | 26            | 247            | 4                   |
| Cixian              | 1,380         | 615            | 42             | 44            | 261            | 21            | 387            | 4                   |
| Dafeng              | 397           | 451            | 23             | 51            | 195            | 30            | 291            | 7                   |
| Dalian              | 285           | 1,417          | 567            | 627           | 1,072          | 395           | 2,589          | 38                  |
| Donghai             | 47            | 120            | 20             | 16            | 129            | 8             | 170            | -                   |
| Feicheng            | 1,243         | 594            | 47             | 71            | 329            | 29            | 445            | -                   |
| Ganyu               | 470           | 250            | 24             | 76            | 239            | 57            | 319            | 5                   |
| Guanyun             | 194           | 148            | 19             | 49            | 178            | 14            | 130            | -                   |
| Haimen              | 372           | 835            | 153            | 252           | 1,274          | 180           | 1,198          | 7                   |
| Haining             | 139           | 273            | 138            | 101           | 305            | 109           | 553            | 5                   |
| Jianhu              | 1,128         | 1,410          | 22             | 69            | 432            | 53            | 350            | 4                   |
| Jiashan             | 126           | 276            | 148            | 93            | 261            | 89            | 414            | 7                   |
| Jintan              | 406           | 801            | 99             | 50            | 182            | 42            | 230            | 4                   |
| Lianyungang         | -             | -              | -              | -             | -              | -             | -              | -                   |
| Linzhou             | 1,440         | 1,323          | 59             | 92            | 181            | 20            | 201            | 3                   |
| Qidong              | 275           | 767            | 139            | 255           | 1,804          | 182           | 1,159          | 6                   |
| Sihui               | 34            | 59             | 46             | 36            | 244            | 8             | 202            | 1                   |
| Taixing             | 1,394         | 1,100          | 84             | 105           | 1,283          | 126           | 497            | -                   |
| Yangzhong           | 599           | 720            | 50             | 55            | 136            | 37            | 150            | 5                   |
| Zhongshan           | 301           | 261            | 261            | 220           | 592            | 100           | 971            | 11                  |
| Cyprus *            | 1             | 52             | 207            | 45            | 12             | 33            | 169            | 28                  |
| Hong Kong *         | -             | -              | -              | -             | -              | -             | -              | -                   |
| Indian registries   | 85            | 87             | 54             | 36            | 47             | 27            | 204            | 5                   |
| Guwahati            | -             | -              | -              | -             | -              | -             | -              | -                   |
| Karunagappally      | 85            | 87             | 54             | 36            | 47             | 27            | 204            | 5                   |
| Iran (Golestan)     | -             | -              | -              | -             | -              | -             | -              | -                   |
| Israel *            | 572           | 3,381          | 11,708         | 3,226         | 695            | 2,560         | 7,720          | 3,712               |
| Japanese registries | 15,155        | 91,810         | 54,060         | 25,109        | 32,583         | 15,526        | 58,896         | 862                 |
| Aichi               | 1,050         | 7,268          | 4,795          | 2,432         | 2,818          | 1,550         | 6,009          | 110                 |
| Akita               | -             | -              | -              | -             | -              | -             | -              | -                   |
| Ehime               | -             | -              | -              | -             | -              | -             | -              | -                   |
| Fukui               | 164           | 1,654          | 836            | 363           | 593            | 365           | 1,037          | 11                  |
| Gunma               | 118           | 610            | 348            | 205           | 355            | 144           | 670            | 5                   |
| Hiroshima           | 354           | 2,538          | 1,601          | 779           | 1,031          | 381           | 1,613          | 28                  |
| Hyogo               | -             | -              | -              | -             | -              | -             | -              | -                   |
| Ibaraki             | -             | -              | -              | -             | -              | -             | -              | -                   |
| Kanagawa            | 4,165         | 26,417         | 15,117         | 7,114         | 6,962          | 3,537         | 13,415         | 270                 |

Web-table 3.1 Number of patients included in survival analyses, by continent, country and registry: patients diagnosed during 2000-2004

|                          | Oesophagus    | Stomach        | Colon          | Rectum         | Liver         | Pancreas       | Lung           | Melanoma<br>of skin |
|--------------------------|---------------|----------------|----------------|----------------|---------------|----------------|----------------|---------------------|
| Miyagi                   | 2,004         | 10,065         | 6,110          | 2,634          | 2,290         | 1,817          | 6,180          | 110                 |
| Niigata                  | 1,996         | 12,314         | 7,368          | 2,984          | 1,846         | 1,679          | 6,473          | 109                 |
| Osaka                    | 4,916         | 27,804         | 16,269         | 7,941          | 16,140        | 5,602          | 21,853         | 193                 |
| Saga                     | -             | -              | -              | -              | -             | -              | -              | -                   |
| Tochigi                  | -             | -              | -              | -              | -             | -              | -              | -                   |
| Yamagata                 | 388           | 3,140          | 1,616          | 657            | 548           | 451            | 1,646          | 26                  |
| Yamanashi                | -             | -              | -              | -              | -             | -              | -              | -                   |
| Jordan *                 | 103           | 561            | 1,283          | 459            | 211           | 171            | 1,080          | 90                  |
| Korea * ‡                | 9,046         | 109,281        | 35,863         | 28,846         | 63,950        | 14,036         | 67,457         | 1,274               |
| Kuwait *                 | 27            | 59             | 237            | 85             | 68            | 57             | 180            | 5                   |
| Malaysia (Penang)        | 86            | 345            | 570            | 315            | 257           | 131            | 872            | -                   |
| Mongolia *               | -             | -              | -              | -              | -             | -              | -              | -                   |
| Qatar *                  | 29            | 76             | 117            | 49             | 99            | 36             | 126            | 10                  |
| Singapore *              | 477           | 2,230          | 4,682          | 1,782          | 1,861         | 815            | 5,228          | 87                  |
| Taiwan *                 | 6,528         | 17,541         | 25,759         | 15,288         | 46,792        | 5,462          | 36,891         | 805                 |
| Thai registries          | 853           | 1,358          | 2,934          | 1,207          | 8,996         | 732            | 7,571          | 171                 |
| Bangkok                  | 334           | 587            | 1,393          | 367            | 2,416         | 373            | 3,016          | 27                  |
| Khon Kaen                | 55            | 211            | 492            | 225            | 4,268         | 89             | 979            | 39                  |
| Lampang                  | 54            | 184            | 295            | 177            | 936           | 83             | 1,651          | 31                  |
| Lamphun                  | 22            | 99             | 140            | 82             | 272           | 52             | 593            | 18                  |
| Lopburi                  | 127           | 162            | 288            | 124            | 710           | 72             | 638            | 26                  |
| Songkhla                 | 261           | 115            | 326            | 232            | 394           | 63             | 694            | 30                  |
| Turkish registries       | 333           | 1,526          | 1,540          | 954            | 438           | 658            | 7,217          | 283                 |
| Ankara                   | -             | -              | -              | -              | -             | -              | -              | -                   |
| Antalya                  | -             | -              | -              | -              | -             | -              | -              | -                   |
| Bursa                    | -             | -              | -              | -              | -             | -              | -              | -                   |
| Edirne                   | -             | -              | -              | -              | -             | -              | -              | -                   |
| Erzurum                  | -             | -              | -              | -              | -             | -              | -              | -                   |
| Eskisehir                | -             | -              | -              | -              | -             | -              | -              | -                   |
| Izmir                    | 333           | 1,526          | 1,540          | 954            | 438           | 658            | 7,217          | 283                 |
| Samsun                   | -             | -              | -              | -              | -             | -              | -              | -                   |
| Trabzon                  | -             | -              | -              | -              | -             | -              | -              | -                   |
| <b>EUROPE</b>            | <b>88,522</b> | <b>229,904</b> | <b>526,276</b> | <b>242,600</b> | <b>80,191</b> | <b>143,572</b> | <b>700,379</b> | <b>165,531</b>      |
| Austria *                | 1,606         | 6,976          | 15,555         | 8,325          | 3,490         | 5,425          | 17,432         | 5,529               |
| Belarus (Childhood) †    | -             | -              | -              | -              | -             | -              | -              | -                   |
| Belgium *                | 851           | 1,367          | 5,417          | 2,247          | 365           | 1,065          | 7,055          | 1,493               |
| Bulgaria *               | -             | 7,113          | 10,645         | 6,905          | 1,639         | -              | 15,609         | 1,598               |
| Croatia *                | 1,016         | 5,410          | 7,911          | 4,991          | 1,615         | 2,664          | 14,021         | 2,197               |
| Czech Republic *         | 2,062         | 8,309          | 27,208         | 11,140         | 3,556         | 7,623          | 29,012         | 7,743               |
| Denmark *                | 1,970         | 2,519          | 12,018         | 6,421          | 1,302         | 3,885          | 18,709         | 5,548               |
| Estonia *                | 268           | 2,067          | 2,231          | 1,165          | 274           | 905            | 3,507          | 607                 |
| Finland *                | 1,088         | 3,588          | 7,299          | 3,802          | 1,230         | 3,806          | 9,825          | 3,578               |
| French registries        | 3,806         | 5,503          | 20,005         | 7,604          | 5,084         | 4,894          | 18,904         | 4,492               |
| Bas-Rhin                 | 392           | 575            | 2,251          | 836            | 671           | 603            | 2,700          | 743                 |
| Basse Normandie          | -             | -              | -              | -              | -             | -              | -              | -                   |
| Burgundy Digestive       | 463           | 735            | 2,639          | 829            | 577           | 752            | -              | -                   |
| Calvados                 | -             | -              | -              | -              | -             | -              | 1,612          | -                   |
| Calvados Digestive       | 380           | 410            | 1,152          | 515            | 475           | 441            | -              | -                   |
| Côte-d'Or Gynaecologic   | -             | -              | -              | -              | -             | -              | -              | -                   |
| Côte-d'Or Haematopoietic | -             | -              | -              | -              | -             | -              | -              | -                   |
| Doubs                    | 169           | 275            | 969            | 435            | 202           | 237            | 1,267          | 282                 |
| Finistère                | -             | -              | -              | -              | -             | -              | -              | -                   |
| Gironde CNS              | -             | -              | -              | -              | -             | -              | -              | -                   |
| Gironde General          | -             | -              | -              | -              | -             | -              | -              | -                   |
| Gironde Haematopoietic   | -             | -              | -              | -              | -             | -              | -              | -                   |
| Haut-Rhin                | 280           | 426            | 1,771          | 564            | 338           | 369            | 1,642          | 531                 |
| Haute-Vienne             | -             | -              | -              | -              | -             | -              | -              | -                   |
| Hérault                  | 277           | 500            | 2,249          | 812            | 499           | 577            | 2,389          | 503                 |
| Isère                    | 299           | 628            | 2,189          | 833            | 631           | 603            | 2,490          | 653                 |
| Lille Metro              | -             | -              | -              | -              | -             | -              | -              | -                   |
| Loire-Atlantique         | 808           | 935            | 3,734          | 1,457          | 1,103         | 585            | 3,245          | 1,258               |
| Manche                   | 298           | 493            | 1,020          | 422            | 193           | 217            | 1,163          | 308                 |
| Somme                    | 314           | 300            | 1,093          | 463            | 262           | 266            | 1,468          | -                   |
| Tarn                     | 126           | 226            | 938            | 438            | 133           | 244            | 928            | 214                 |
| France Childhood Haem †  | -             | -              | -              | -              | -             | -              | -              | -                   |
| France Childhood Solid † | -             | -              | -              | -              | -             | -              | -              | -                   |
| German registries        | 7,353         | 23,204         | 58,073         | 30,335         | 6,815         | 14,130         | 60,050         | 19,897              |
| Brandenburg              | 771           | 2,416          | 5,436          | 3,106          | 703           | 1,517          | 6,507          | 1,570               |
| Bremen                   | 254           | 685            | 1,913          | 927            | 205           | 445            | 2,368          | 484                 |
| Hamburg                  | 574           | 1,268          | 3,338          | 1,628          | 463           | 1,138          | 5,037          | 1,613               |
| Lower Saxony             | 1,026         | 2,961          | 8,480          | 3,874          | 760           | 1,712          | 7,333          | 2,983               |
| Mecklenburg-W. Pomerania | 645           | 1,978          | 3,602          | 2,102          | 509           | 1,063          | 4,773          | 982                 |
| Rhineland Palatinate     | 1,107         | 3,100          | 9,667          | 4,563          | 1,121         | 1,928          | 7,808          | 3,495               |
| Saarland                 | 359           | 1,026          | 3,118          | 1,646          | 405           | 645            | 3,383          | 734                 |
| Saxony                   | 1,212         | 5,155          | 10,757         | 6,005          | 1,564         | 2,974          | 10,345         | 3,208               |

**Web-table 3.1 Number of patients included in survival analyses, by continent, country and registry: patients diagnosed during 2000-2004**

|                                | Oesophagus | Stomach | Colon  | Rectum | Liver  | Pancreas | Lung   | Melanoma<br>of skin |
|--------------------------------|------------|---------|--------|--------|--------|----------|--------|---------------------|
| Schleswig-Holstein             | 924        | 2,657   | 7,029  | 3,644  | 514    | 1,520    | 7,349  | 3,197               |
| Thuringia                      | 481        | 1,958   | 4,733  | 2,840  | 571    | 1,188    | 5,147  | 1,631               |
| Gibraltar *                    | 7          | 15      | 30     | 3      | 1      | 3        | 10     | 13                  |
| Greece (National Paediatric) † | -          | -       | -      | -      | -      | -        | -      | -                   |
| Iceland *                      | 70         | 173     | 413    | 177    | 29     | 144      | 657    | 255                 |
| Ireland *                      | 1,596      | 2,224   | 6,674  | 2,998  | 503    | 1,768    | 8,268  | 2,514               |
| Italian registries             | 4,724      | 29,909  | 62,659 | 18,119 | 21,022 | 18,189   | 69,760 | 14,162              |
| Alto Adige                     | 139        | 698     | 1,190  | 362    | 340    | 360      | 993    | 414                 |
| Barletta-Andria-Trani          | -          | -       | -      | -      | -      | -        | -      | -                   |
| Basilicata                     | -          | -       | -      | -      | -      | -        | -      | -                   |
| Bergamo                        | -          | -       | -      | -      | -      | -        | -      | -                   |
| Biella-Vercelli                | 55         | 264     | 613    | 203    | 208    | 190      | 760    | 149                 |
| Brescia                        | 325        | 1,859   | 2,841  | 589    | 1,640  | 995      | 3,422  | 682                 |
| Brindisi                       | -          | -       | -      | -      | -      | -        | -      | -                   |
| Caserta                        | -          | -       | -      | -      | -      | -        | -      | -                   |
| Catania-Messina-Enna           | 63         | 678     | 1,709  | 478    | 433    | 474      | 1,753  | 257                 |
| Catanzaro                      | 9          | 114     | 198    | 65     | 69     | 42       | 175    | 30                  |
| Como                           | 56         | 310     | 644    | 187    | 247    | 194      | 726    | 182                 |
| Cremona                        | -          | -       | -      | -      | -      | -        | -      | -                   |
| Ferrara                        | 104        | 569     | 1,626  | 349    | 411    | 386      | 1,688  | 242                 |
| Friuli-Venezia-Giulia          | 527        | 2,156   | 4,365  | 1,032  | 1,366  | 1,269    | 4,052  | 1,115               |
| Genoa                          | 241        | 1,274   | 3,748  | 965    | 953    | 946      | 4,070  | 810                 |
| Latina                         | 65         | 490     | 1,080  | 337    | 218    | 239      | 1,337  | 336                 |
| Lecce                          | 30         | 275     | 790    | 162    | 326    | 198      | 1,020  | 115                 |
| Mantova                        | 100        | 651     | 1,285  | 349    | 360    | 446      | 1,284  | 239                 |
| Milano                         | 359        | 1,917   | 4,704  | 1,677  | 1,685  | 1,515    | 6,015  | 1,325               |
| Modena                         | 99         | 1,013   | 2,145  | 569    | 581    | 596      | 2,376  | 362                 |
| Monza-Brianza                  | -          | -       | -      | -      | -      | -        | -      | -                   |
| Naples                         | 47         | 410     | 745    | 220    | 831    | 194      | 1,301  | 155                 |
| Nuoro                          | 18         | 83      | 188    | 64     | 131    | 62       | 168    | 11                  |
| Palermo                        | 47         | 320     | 1,126  | 290    | 472    | 290      | 1,081  | 158                 |
| Parma                          | 110        | 933     | 1,470  | 345    | 747    | 499      | 1,548  | 295                 |
| Pavia                          | 51         | 359     | 790    | 215    | 402    | 239      | 894    | 119                 |
| Piacenza                       | -          | -       | -      | -      | -      | -        | -      | -                   |
| Ragusa                         | 17         | 233     | 596    | 240    | 288    | 235      | 644    | 124                 |
| Reggio Emilia                  | 87         | 866     | 1,466  | 418    | 388    | 484      | 1,700  | 251                 |
| Romagna                        | 136        | 2,680   | 4,004  | 979    | 623    | 1,100    | 4,192  | 845                 |
| Salerno                        | 102        | 856     | 2,070  | 605    | 940    | 472      | 2,715  | 415                 |
| Sassari                        | 84         | 304     | 910    | 307    | 466    | 353      | 1,129  | 121                 |
| Siracusa                       | 30         | 259     | 820    | 236    | 308    | 232      | 880    | 145                 |
| Sondrio                        | 70         | 307     | 482    | 118    | 249    | 199      | 632    | 105                 |
| Taranto                        | -          | -       | -      | -      | -      | -        | -      | -                   |
| Trapani                        | 30         | 177     | 488    | 169    | 161    | 133      | 549    | 128                 |
| Trento                         | 209        | 648     | 1,267  | 362    | 459    | 398      | 1,133  | 290                 |
| Turin                          | 180        | 990     | 3,107  | 939    | 849    | 754      | 3,535  | 777                 |
| Tuscany                        | 192        | 2,434   | 4,103  | 1,424  | 858    | 1,029    | 4,324  | 1,025               |
| Umbria                         | 126        | 1,906   | 2,969  | 1,024  | 778    | 709      | 2,681  | 490                 |
| Varese                         | 179        | 1,235   | 2,517  | 691    | 729    | 656      | 2,757  | 583                 |
| Veneto                         | 837        | 2,641   | 6,603  | 2,149  | 2,506  | 2,301    | 8,226  | 1,867               |
| Viterbo                        | -          | -       | -      | -      | -      | -        | -      | -                   |
| Piedmont Childhood             | -          | -       | -      | -      | -      | -        | -      | -                   |
| Latvia *                       | 367        | 2,428   | 2,234  | 1,605  | 62     | 283      | 2,674  | 698                 |
| Lithuania *                    | 818        | 5,063   | 4,106  | 2,958  | 655    | 2,199    | 7,856  | 1,107               |
| Malta *                        | 43         | 207     | 551    | 240    | 37     | 207      | 584    | 156                 |
| Netherlands *                  | 6,626      | 10,227  | 36,069 | 13,508 | 1,509  | 7,626    | 46,713 | 14,176              |
| Norway *                       | 854        | 2,776   | 10,963 | 5,260  | 510    | 1,919    | 9,759  | 5,110               |
| Poland *                       | 6,045      | 25,346  | 36,925 | 24,802 | 6,245  | 13,934   | 94,469 | 9,422               |
| Greater Poland                 | 496        | 1,995   | 3,294  | 2,213  | 533    | 980      | 7,130  | 895                 |
| Holy Cross                     | 188        | 1,194   | 1,358  | 1,048  | 209    | 684      | 3,735  | 376                 |
| Kuiavia-Pomerania              | 286        | 1,199   | 1,784  | 1,214  | 208    | 512      | 4,966  | 468                 |
| Lesser Poland                  | 510        | 2,450   | 3,043  | 2,172  | 566    | 1,391    | 8,110  | 1,091               |
| Łódź                           | 367        | 1,474   | 2,198  | 1,424  | 383    | 945      | 5,690  | 458                 |
| Lower Silesia                  | 529        | 2,252   | 3,503  | 2,180  | 675    | 1,378    | 9,272  | 720                 |
| Lublin                         | 255        | 1,151   | 1,660  | 1,374  | 303    | 797      | 4,733  | 493                 |
| Lubush                         | 131        | 643     | 843    | 640    | 141    | 324      | 2,435  | 163                 |
| Mazovia                        | 688        | 2,802   | 5,265  | 3,173  | 729    | 1,745    | 12,048 | 1,467               |
| Opole                          | 221        | 768     | 1,079  | 852    | 141    | 373      | 2,705  | 300                 |
| Podlaha                        | 182        | 841     | 1,037  | 759    | 234    | 370      | 2,284  | 217                 |
| Pomerania                      | 392        | 1,257   | 2,106  | 1,248  | 330    | 659      | 5,653  | 480                 |
| Silesia                        | 1,143      | 4,073   | 5,519  | 3,284  | 1,111  | 2,192    | 12,132 | 1,186               |
| Subcarpathia                   | 225        | 1,650   | 1,791  | 1,374  | 367    | 860      | 4,625  | 487                 |
| Varmia-Mazuria                 | 195        | 831     | 1,142  | 825    | 149    | 306      | 3,915  | 277                 |
| West Pomerania                 | 237        | 766     | 1,303  | 1,022  | 166    | 418      | 5,036  | 344                 |
| Portugal *                     | 2,035      | 12,304  | 17,152 | 8,229  | 1,622  | 2,230    | 12,337 | 2,533               |
| Azores                         | 40         | 247     | 299    | 96     | 54     | 94       | 505    | 73                  |
| Portugal Central               | -          | 1,022   | 1,543  | 852    | 148    | -        | 827    | -                   |
| Portugal North                 | 903        | 5,497   | 5,452  | 2,763  | 462    | 506      | 4,069  | 723                 |
| Portugal South                 | 1,092      | 5,538   | 9,858  | 4,518  | 958    | 1,630    | 6,936  | 1,737               |

Web-table 3.1 Number of patients included in survival analyses, by continent, country and registry: patients diagnosed during 2000-2004

|                              | Oesophagus     | Stomach        | Colon            | Rectum         | Liver          | Pancreas       | Lung             | Melanoma<br>of skin |
|------------------------------|----------------|----------------|------------------|----------------|----------------|----------------|------------------|---------------------|
| Romania (Cluj)               | -              | -              | -                | -              | -              | -              | -                | -                   |
| Russian registries ‡         | 1,630          | 9,148          | 6,820            | 3,910          | 1,028          | 2,316          | 11,374           | 1,349               |
| Arkhangelsk                  | 606            | 2,634          | 1,439            | 920            | 282            | 570            | 2,792            | 267                 |
| Karelia                      | 280            | 1,346          | 929              | 450            | 99             | 312            | 1,412            | 217                 |
| Omsk                         | 142            | 941            | 787              | 467            | 49             | 175            | 1,185            | -                   |
| Samara                       | 602            | 4,227          | 3,665            | 2,073          | 598            | 1,259          | 5,985            | 865                 |
| Tomsk                        | -              | -              | -                | -              | -              | -              | -                | -                   |
| Slovakia *                   | 1,154          | 4,189          | 9,510            | 4,438          | 902            | 2,286          | 9,182            | 2,523               |
| Slovenia *                   | 445            | 2,273          | 3,680            | 2,191          | 569            | 1,163          | 5,348            | 1,487               |
| Spanish registries           | 2,122          | 6,850          | 18,112           | 6,335          | 4,146          | 4,189          | 19,003           | 3,721               |
| Basque Country               | 817            | 2,552          | 5,606            | 2,022          | 1,496          | 1,357          | 5,783            | 1,089               |
| Canaries                     | 394            | 739            | 2,274            | 814            | 604            | 650            | 2,749            | 489                 |
| Girona                       | 170            | 580            | 1,619            | 568            | 302            | 324            | 1,506            | 259                 |
| Granada                      | 138            | 584            | 1,436            | 506            | 420            | 297            | 1,597            | 312                 |
| Mallorca                     | 156            | 413            | 1,613            | 489            | 337            | 306            | 1,770            | 345                 |
| Murcia                       | 185            | 848            | 2,542            | 801            | 400            | 493            | 2,493            | 583                 |
| Navarra                      | 121            | 650            | 1,294            | 589            | 275            | 405            | 1,534            | 324                 |
| Tarragona                    | 141            | 484            | 1,728            | 546            | 312            | 357            | 1,571            | 320                 |
| Spain Childhood              | -              | -              | -                | -              | -              | -              | -                | -                   |
| Valencia Childhood           | -              | -              | -                | -              | -              | -              | -                | -                   |
| Sweden *                     | 1,928          | 4,965          | 17,095           | 9,031          | 2,091          | 4,241          | 14,750           | 9,211               |
| Swiss registries             | 1,092          | 2,072          | 6,748            | 2,709          | 1,480          | 2,215          | 8,267            | 4,087               |
| Basel                        | 97             | 159            | 595              | 209            | 69             | 110            | 699              | 318                 |
| Fribourg                     | -              | -              | -                | -              | -              | -              | -                | -                   |
| Geneva                       | 170            | 190            | 828              | 294            | 256            | 291            | 1,085            | 611                 |
| Graubünden-Glarus            | 66             | 172            | 431              | 151            | 78             | 174            | 544              | 226                 |
| Neuchâtel                    | 70             | 78             | 373              | 162            | 83             | 112            | 498              | 252                 |
| St Gallen-Appenzell          | 143            | 289            | 889              | 446            | 144            | 349            | 1,139            | 485                 |
| Ticino                       | 108            | 280            | 668              | 311            | 261            | 263            | 882              | 402                 |
| Valais                       | 107            | 214            | 511              | 179            | 173            | 195            | 712              | 287                 |
| Zürich and Zug               | 331            | 690            | 2,453            | 957            | 416            | 721            | 2,708            | 1,506               |
| Switzerland Childhood †      | -              | -              | -                | -              | -              | -              | -                | -                   |
| United Kingdom *             | 36,946         | 43,679         | 120,173          | 53,152         | 12,410         | 34,263         | 185,244          | 40,325              |
| England                      | 30,062         | 35,380         | 97,669           | 44,021         | 10,118         | 28,541         | 148,426          | 33,228              |
| Northern Ireland             | 740            | 1,178          | 3,217            | 1,381          | 232            | 760            | 4,324            | 1,094               |
| Scotland                     | 4,011          | 4,389          | 12,560           | 4,841          | 1,387          | 3,042          | 22,599           | 3,896               |
| Wales                        | 2,133          | 2,732          | 6,727            | 2,909          | 673            | 1,920          | 9,895            | 2,107               |
| <b>OCEANIA</b>               | <b>6,805</b>   | <b>11,413</b>  | <b>56,204</b>    | <b>21,574</b>  | <b>4,995</b>   | <b>11,105</b>  | <b>50,444</b>    | <b>57,571</b>       |
| Australia *                  | 5,653          | 9,563          | 46,649           | 18,176         | 4,329          | 9,616          | 42,590           | 48,550              |
| Australian Capital Territory | 64             | 108            | 605              | 214            | 55             | 84             | 377              | 568                 |
| New South Wales              | 1,795          | 3,134          | 15,190           | 6,001          | 1,577          | 3,181          | 13,984           | 15,818              |
| Northern Territory           | 41             | 33             | 171              | 90             | 32             | 38             | 230              | 253                 |
| Queensland                   | 1,129          | 1,748          | 9,522            | 3,442          | 739            | 1,782          | 8,540            | 13,298              |
| South Australia              | 478            | 877            | 4,296            | 1,438          | 318            | 886            | 3,673            | 3,243               |
| Tasmania                     | 182            | 251            | 1,246            | 469            | 84             | 281            | 1,315            | 1,124               |
| Victoria                     | 1,421          | 2,630          | 11,679           | 4,942          | 1,215          | 2,489          | 10,420           | 9,411               |
| Western Australia            | 543            | 782            | 3,940            | 1,580          | 309            | 875            | 4,051            | 4,835               |
| New Zealand *                | 1,152          | 1,850          | 9,555            | 3,398          | 666            | 1,489          | 7,854            | 9,021               |
| <b>Total</b>                 | <b>209,709</b> | <b>600,724</b> | <b>1,296,079</b> | <b>508,601</b> | <b>319,043</b> | <b>342,772</b> | <b>1,855,464</b> | <b>439,086</b>      |

Web-table 3.1 Number of patients included in survival analyses, by continent, country and registry: patients diagnosed during 2000-2004

|                                    | Breast<br>(women) | Cervix        | Ovary          | Prostate       | Brain<br>(adults) | Brain<br>(children) | Myeloid<br>(adults) | Lymphoid<br>(adults) | ALL<br>(children) | Lymphoma<br>(children) | Total            |
|------------------------------------|-------------------|---------------|----------------|----------------|-------------------|---------------------|---------------------|----------------------|-------------------|------------------------|------------------|
| <b>AFRICA</b>                      | <b>965</b>        | <b>821</b>    | <b>90</b>      | <b>220</b>     | <b>37</b>         | <b>33</b>           | <b>77</b>           | <b>372</b>           | <b>25</b>         | <b>43</b>              | <b>5,444</b>     |
| Algerian registries                | 796               | 249           | 74             | 133            | 36                | 23                  | 68                  | 340                  | 21                | 32                     | 3,150            |
| Annaba                             | 292               | 38            | 36             | 39             | 7                 | 10                  | 68                  | 212                  | 17                | 17                     | 1,058            |
| Sétif                              | 504               | 211           | 38             | 94             | 29                | 13                  | -                   | 128                  | 4                 | 15                     | 2,092            |
| Tlemcen                            | -                 | -             | -              | -              | -                 | -                   | -                   | -                    | -                 | -                      | -                |
| Mali (Bamako)                      | -                 | -             | -              | -              | -                 | -                   | -                   | -                    | -                 | -                      | -                |
| Mauritius *                        | -                 | -             | -              | -              | -                 | -                   | -                   | -                    | -                 | -                      | -                |
| Morocco (Casablanca)               | -                 | -             | -              | -              | -                 | -                   | -                   | -                    | -                 | -                      | -                |
| Nigeria (Ibadan)                   | 4                 | -             | -              | 1              | -                 | -                   | -                   | -                    | -                 | -                      | 5                |
| South Africa (Eastern Cape)        | 165               | 572           | 16             | 86             | 1                 | 10                  | 9                   | 32                   | 4                 | 11                     | 2,289            |
| <b>AMERICA (Central and South)</b> | <b>45,766</b>     | <b>14,582</b> | <b>4,366</b>   | <b>29,972</b>  | <b>1,988</b>      | <b>1,235</b>        | <b>2,213</b>        | <b>12,058</b>        | <b>2,405</b>      | <b>1,226</b>           | <b>189,874</b>   |
| Argentinian registries             | 2,237             | 379           | 261            | 1,007          | 129               | 913                 | 254                 | 663                  | 1,815             | 711                    | 11,216           |
| Chubut                             | -                 | -             | -              | -              | -                 | -                   | -                   | -                    | -                 | -                      | -                |
| Córdoba                            | 730               | 127           | 98             | 303            | 58                | -                   | 53                  | 189                  | -                 | -                      | 2,435            |
| Mendoza                            | 1,507             | 252           | 163            | 704            | 71                | -                   | 201                 | 474                  | -                 | -                      | 5,342            |
| Tierra del Fuego                   | -                 | -             | -              | -              | -                 | -                   | -                   | -                    | -                 | -                      | -                |
| Argentina (Childhood) †            | -                 | -             | -              | -              | -                 | 913                 | -                   | -                    | 1,815             | 711                    | 3,439            |
| Brazilian registries               | 18,272            | 1,329         | 438            | 2,359          | 298               | 77                  | 213                 | 1,122                | 91                | 57                     | 49,043           |
| Aracaju                            | 600               | 309           | 94             | 650            | 54                | 21                  | 38                  | 218                  | 12                | 13                     | 2,822            |
| Cuiabá                             | -                 | 383           | -              | -              | -                 | -                   | -                   | -                    | -                 | -                      | 383              |
| Curitiba                           | 2,572             | 603           | 318            | 1,520          | 225               | 54                  | 162                 | 828                  | 75                | 39                     | 10,200           |
| Goiânia                            | 1,201             | -             | -              | -              | -                 | -                   | -                   | -                    | -                 | -                      | 2,006            |
| Jaú                                | 167               | 34            | 26             | 189            | 19                | 2                   | 13                  | 76                   | 4                 | 5                      | 936              |
| São Paulo                          | 13,732            | -             | -              | -              | -                 | -                   | -                   | -                    | -                 | -                      | 32,696           |
| Chilean registries                 | 593               | 350           | 131            | 933            | 57                | 16                  | 101                 | 342                  | 32                | 10                     | 4,686            |
| Antofagasta                        | 137               | 41            | 29             | 142            | 7                 | 1                   | 28                  | 71                   | 4                 | 6                      | 965              |
| Biobio                             | 124               | 77            | 31             | 214            | 17                | 6                   | 29                  | 70                   | 10                | 1                      | 1,070            |
| Concepción                         | -                 | -             | -              | -              | -                 | -                   | -                   | -                    | -                 | -                      | -                |
| Los Rios                           | 332               | 232           | 71             | 577            | 33                | 9                   | 44                  | 201                  | 18                | 3                      | 2,651            |
| Colombian registries               | 2,658             | 1,709         | 508            | 2,515          | 447               | 72                  | 353                 | 1,349                | 161               | 55                     | 15,680           |
| Bucaramanga                        | -                 | 175           | -              | -              | -                 | -                   | -                   | -                    | -                 | -                      | 444              |
| Cali                               | 2,309             | 1,181         | 428            | 2,249          | 392               | 69                  | 313                 | 1,173                | 138               | 48                     | 12,881           |
| Manizales                          | 142               | 93            | 31             | 130            | 14                | 1                   | 16                  | 52                   | 9                 | 3                      | 887              |
| Pasto                              | 207               | 260           | 49             | 136            | 41                | 2                   | 24                  | 124                  | 14                | 4                      | 1,468            |
| Costa Rica *                       | 2,189             | 2,109         | 307            | 2,356          | 263               | 15                  | 229                 | 991                  | 46                | 3                      | 13,450           |
| Cuba *                             | 10,481            | 6,488         | 1,675          | 6,857          | -                 | -                   | -                   | 3,297                | -                 | 264                    | 44,485           |
| Ecuadorian registries              | 1,354             | 1,135         | 315            | 1,373          | 252               | 42                  | 283                 | 1,147                | 172               | 64                     | 9,573            |
| Cuenca Ecuador                     | 63                | 60            | 14             | 87             | 20                | 6                   | 26                  | 106                  | 15                | 5                      | 634              |
| Guayaquil                          | -                 | -             | -              | -              | -                 | -                   | -                   | -                    | -                 | -                      | -                |
| Loja                               | 90                | 128           | 27             | 89             | 32                | 4                   | 37                  | 94                   | 20                | 8                      | 915              |
| Manabí                             | 262               | 356           | 58             | 171            | 21                | 7                   | 34                  | 173                  | 48                | 17                     | 1,894            |
| Quito                              | 939               | 591           | 216            | 1,026          | 179               | 25                  | 186                 | 774                  | 89                | 34                     | 6,130            |
| Guadeloupe *                       | -                 | -             | -              | -              | -                 | -                   | -                   | -                    | -                 | -                      | -                |
| Martinique *                       | 758               | 177           | 69             | 2,184          | 58                | 7                   | 147                 | 408                  | 14                | 6                      | 5,229            |
| Mexico (Childhood) †               | -                 | -             | -              | -              | -                 | -                   | -                   | -                    | -                 | -                      | -                |
| Peru (Lima)                        | -                 | -             | -              | -              | -                 | -                   | -                   | -                    | -                 | -                      | -                |
| Puerto Rico *                      | 7,224             | 906           | 662            | 10,388         | 484               | 93                  | 633                 | 2,739                | 74                | 56                     | 36,512           |
| Uruguay *                          | -                 | -             | -              | -              | -                 | -                   | -                   | -                    | -                 | -                      | -                |
| <b>AMERICA (North)</b>             | <b>888,720</b>    | <b>59,724</b> | <b>108,985</b> | <b>948,751</b> | <b>76,162</b>     | <b>8,447</b>        | <b>146,980</b>      | <b>440,362</b>       | <b>10,119</b>     | <b>4,487</b>           | <b>4,849,211</b> |
| Canadian registries                | 71,385            | 5,344         | 9,722          | 80,509         | 7,276             | 627                 | 11,481              | 39,461               | 812               | 373                    | 415,750          |
| Alberta                            | 8,357             | 807           | 1,005          | 10,335         | 870               | 81                  | 1,659               | 4,623                | 120               | 64                     | 48,335           |
| British Columbia                   | 12,319            | 746           | 1,479          | 13,809         | 1,310             | 97                  | 2,405               | 6,523                | 133               | 44                     | 71,701           |
| Manitoba                           | 3,624             | 252           | 506            | 3,595          | 335               | 26                  | 823                 | 2,269                | 51                | 10                     | 21,436           |
| New Brunswick                      | 2,342             | 186           | 325            | 2,614          | 254               | 17                  | 367                 | 1,361                | 22                | 5                      | 14,571           |
| Newfoundland & Labrador            | 1,515             | 156           | 152            | 1,557          | 171               | 15                  | 186                 | 506                  | 12                | 8                      | 8,499            |
| Nova Scotia                        | 3,165             | 306           | 330            | 3,450          | 330               | 25                  | 490                 | 1,581                | 31                | 12                     | 19,575           |
| Ontario                            | 36,583            | 2,652         | 5,514          | 40,361         | 3,685             | 341                 | 4,829               | 20,412               | 408               | 211                    | 209,959          |
| Prince Edward Island               | 463               | 32            | 39             | 614            | 44                | 2                   | 98                  | 241                  | 4                 | 3                      | 2,867            |
| Saskatchewan                       | 3,017             | 207           | 372            | 4,174          | 277               | 23                  | 624                 | 1,945                | 31                | 16                     | 18,807           |
| US registries                      | 817,335           | 54,380        | 99,263         | 868,242        | 68,886            | 7,820               | 135,499             | 400,901              | 9,307             | 4,114                  | 4,433,461        |
| Alabama                            | 14,174            | 1,110         | 1,783          | 14,782         | 1,213             | 120                 | 1,983               | 6,618                | 132               | 73                     | 79,352           |
| Alaska                             | 1,642             | 104           | 162            | 1,661          | 148               | 17                  | 214                 | 724                  | 24                | 17                     | 8,290            |
| Arkansas                           | 8,864             | 700           | 974            | 10,250         | 756               | 79                  | 1,541               | 4,514                | 90                | 51                     | 52,519           |
| California                         | 102,909           | 7,471         | 12,641         | 105,332        | 8,541             | 1,073               | 15,439              | 48,176               | 1,691             | 586                    | 533,082          |
| Greater Bay Area                   | 20,656            | 1,153         | 2,477          | 21,746         | 1,647             | 180                 | 2,875               | 10,172               | 258               | 103                    | 104,765          |
| Greater California                 | 54,865            | 3,698         | 6,759          | 56,005         | 4,906             | 589                 | 8,568               | 25,388               | 954               | 320                    | 290,547          |
| Los Angeles                        | 25,615            | 2,617         | 3,407          | 27,579         | 1,981             | 303                 | 3,983               | 12,560               | 479               | 162                    | 135,188          |
| Colorado                           | 13,236            | 775           | 1,622          | 13,763         | 1,204             | 132                 | 2,058               | 6,291                | 178               | 79                     | 66,153           |
| Connecticut                        | 13,124            | 639           | 1,587          | 14,351         | 1,125             | 130                 | 1,941               | 6,671                | 134               | 63                     | 72,371           |
| Delaware                           | 2,817             | 189           | 369            | 3,360          | 219               | 38                  | 396                 | 1,329                | 31                | 21                     | 16,224           |
| Florida                            | 62,015            | 4,606         | 8,174          | 73,859         | 5,467             | 553                 | 12,906              | 33,203               | 565               | 276                    | 373,332          |
| Georgia                            | 24,963            | 1,990         | 2,933          | 26,015         | 2,031             | 277                 | 3,691               | 11,333               | 291               | 139                    | 134,656          |
| Atlanta                            | 8,491             | 607           | 958            | 8,445          | 612               | 96                  | 1,080               | 3,832                | 107               | 56                     | 41,494           |
| Hawaii                             | 4,023             | 262           | 417            | 3,910          | 236               | 37                  | 692                 | 1,632                | 44                | 20                     | 21,497           |
| Idaho                              | 3,934             | 208           | 456            | 4,870          | 397               | 64                  | 866                 | 2,090                | 52                | 28                     | 21,946           |
| Indiana                            | 19,766            | 1,368         | 2,452          | 18,600         | 1,784             | 188                 | 3,609               | 10,263               | 220               | 96                     | 111,298          |
| Iowa                               | 10,245            | 558           | 1,418          | 10,952         | 947               | 100                 | 2,224               | 5,913                | 97                | 45                     | 59,763           |
| Kentucky                           | 13,516            | 1,111         | 1,672          | 13,845         | 1,180             | 146                 | 2,428               | 7,245                | 135               | 66                     | 84,231           |
| Louisiana                          | 13,908            | 1,127         | 1,510          | 16,477         | 1,089             | 148                 | 2,500               | 7,139                | 142               | 67                     | 82,246           |
| Maine                              | 5,070             | 279           | 598            | 5,768          | 484               | 42                  | 889                 | 2,663                | 37                | 27                     | 29,555           |
| Massachusetts                      | 24,216            | 1,133         | 3,013          | 25,716         | 2,067             | 199                 | 3,357               | 11,270               | 219               | 106                    | 131,365          |
| Michigan                           | 33,744            | 2,074         | 4,323          | 43,051         | 3,005             | 320                 | 6,424               | 17,761               | 381               | 165                    | 196,807          |
| Detroit                            | 13,433            | 925           | 1,704          | 18,548         | 1,087             | 127                 | 2,929               | 7,377                | 135               | 63                     | 82,250           |
| Minnesota                          | 16,856            | 836           | 2,053          | 20,153         | 1,383             | 143                 | 3,166               | 8,937                | 216               | 109                    | 89,320           |
| Mississippi                        | 4,836             | 432           | 542            | 6,041          | 410               | 47                  | 731                 | 2,392                | 42                | 25                     | 29,426           |
| Missouri                           | 19,410            | -             | -              | -              | -                 | -                   | -                   | -                    | -                 | -                      | 19,410           |
| Montana                            | 3,160             | 180           | 415            | 4,319          | 319               | 26                  | 623                 | 1,576                | 31                | 16                     | 18,122           |
| Nebraska                           | 6,013             | 346           | 678            | 6,366          | 506               | 61                  | 995                 | 3,194                | 69                | 27                     | 32,415           |

Web-table 3.1 Number of patients included in survival analyses, by continent, country and registry: patients diagnosed during 2000-2004

|                     | Breast<br>(women) | Cervix        | Ovary         | Prostate      | Brain<br>(adults) | Brain<br>(children) | Myeloid<br>(adults) | Lymphoid<br>(adults) | ALL<br>(children) | Lymphoma<br>(children) | Total            |
|---------------------|-------------------|---------------|---------------|---------------|-------------------|---------------------|---------------------|----------------------|-------------------|------------------------|------------------|
| New Hampshire       | 4,598             | 243           | 533           | 4,879         | 408               | 40                  | 784                 | 2,373                | 48                | 23                     | 25,072           |
| New Jersey          | 30,342            | 2,230         | 4,090         | 37,169        | 2,548             | 307                 | 5,113               | 16,322               | 323               | 160                    | 175,508          |
| New Mexico          | 5,229             | 410           | 662           | 6,337         | 408               | 42                  | 947                 | 2,634                | 105               | 25                     | 28,499           |
| New York            | 65,613            | 4,555         | 8,733         | 70,825        | 5,595             | 642                 | 11,389              | 34,074               | 667               | 345                    | 351,174          |
| New York City       | 23,685            | 2,339         | 3,212         | 25,225        | 1,912             | 243                 | 3,515               | 12,583               | 265               | 151                    | 127,492          |
| North Carolina      | 27,338            | 1,764         | 3,230         | 29,248        | 2,302             | 264                 | 3,755               | 12,630               | 269               | 127                    | 146,820          |
| Ohio                | 39,274            | 2,419         | 4,552         | 39,410        | 3,364             | 328                 | 5,528               | 19,001               | 405               | 180                    | 215,144          |
| Oklahoma            | 12,242            | 848           | 1,458         | 11,822        | 1,085             | 111                 | 1,899               | 5,859                | 127               | 56                     | 66,536           |
| Oregon              | 13,141            | 639           | 1,634         | 13,063        | 1,187             | 101                 | 1,640               | 6,074                | 145               | 60                     | 67,969           |
| Pennsylvania        | 46,803            | 2,718         | 6,094         | 51,723        | 3,978             | 396                 | 8,804               | 24,536               | 438               | 177                    | 269,119          |
| Rhode Island        | 3,916             | 230           | 489           | 4,311         | 356               | 34                  | 689                 | 1,921                | 54                | 17                     | 22,835           |
| South Carolina      | 13,603            | 995           | 1,605         | 16,307        | 1,100             | 107                 | 2,138               | 6,573                | 128               | 66                     | 78,256           |
| Tennessee           | 18,177            | 1,279         | 2,103         | 15,235        | 1,694             | 145                 | 2,104               | 7,911                | 190               | 91                     | 94,400           |
| Texas               | 59,364            | 5,430         | 7,100         | 62,600        | 5,230             | 797                 | 12,138              | 31,624               | 989               | 431                    | 327,339          |
| Utah                | 4,948             | 301           | 688           | 7,096         | 556               | 105                 | 899                 | 2,846                | 103               | 35                     | 27,103           |
| Vermont             | 2,288             | 132           | 243           | 2,447         | 191               | 13                  | 345                 | 1,088                | 38                | 12                     | 12,134           |
| Washington          | 21,422            | 1,078         | 2,752         | 22,210        | 1,909             | 212                 | 3,865               | 10,874               | 211               | 93                     | 112,465          |
| Seattle             | 14,508            | 752           | 1,907         | 15,118        | 1,343             | 142                 | 2,728               | 7,430                | 145               | 59                     | 76,597           |
| West Virginia       | 6,407             | 519           | 896           | 6,893         | 647               | 65                  | 1,213               | 3,370                | 43                | 26                     | 40,390           |
| Wisconsin           | 18,624            | 988           | 2,402         | 21,122        | 1,666             | 154                 | 3,354               | 9,460                | 188               | 80                     | 100,582          |
| Wyoming             | 1,565             | 104           | 207           | 2,104         | 151               | 17                  | 222                 | 797                  | 15                | 8                      | 8,736            |
| <b>ASIA</b>         | <b>147,546</b>    | <b>49,088</b> | <b>25,186</b> | <b>67,343</b> | <b>15,772</b>     | <b>2,343</b>        | <b>27,841</b>       | <b>63,724</b>        | <b>3,436</b>      | <b>1,752</b>           | <b>1,345,125</b> |
| Chinese registries  | 6,694             | 1,120         | 1,234         | 1,208         | 1,471             | 86                  | 1,474               | 2,449                | 66                | 43                     | 81,726           |
| Beijing             | 3,634             | 402           | 731           | 739           | 397               | 22                  | 608                 | 1,232                | 35                | 14                     | 25,217           |
| Changle             | 73                | 43            | 18            | 8             | 39                | 2                   | 22                  | 36                   | 1                 | -                      | 1,907            |
| Cixian              | 57                | 25            | 6             | 6             | 36                | 2                   | 27                  | 33                   | -                 | 1                      | 2,947            |
| Dafeng              | 91                | 50            | 14            | 14            | 45                | -                   | 34                  | -                    | -                 | -                      | 1,693            |
| Dalian              | 997               | 107           | 138           | 138           | 134               | 6                   | 109                 | 289                  | 9                 | 7                      | 8,924            |
| Donghai             | 47                | 9             | 6             | -             | 2                 | -                   | 26                  | 20                   | -                 | -                      | 620              |
| Feicheng            | 104               | 12            | 12            | 15            | 63                | 5                   | 44                  | 38                   | -                 | 2                      | 3,053            |
| Ganyu               | 108               | 13            | 9             | 5             | 55                | 5                   | 44                  | 39                   | -                 | 1                      | 1,719            |
| Guanyun             | 54                | 8             | 7             | 4             | 34                | 1                   | 9                   | 20                   | 2                 | -                      | 871              |
| Haimen              | 252               | 56            | 77            | 57            | 111               | 3                   | 102                 | 177                  | 2                 | 2                      | 5,110            |
| Haining             | 144               | 32            | 23            | 20            | 47                | 3                   | 65                  | 72                   | 1                 | 1                      | 2,031            |
| Jianhu              | 82                | 59            | 12            | 10            | 52                | 1                   | 32                  | 28                   | -                 | 2                      | 3,746            |
| Jiashan             | 115               | 7             | 18            | 16            | 45                | 4                   | 24                  | 50                   | 2                 | 2                      | 1,697            |
| Jintan              | 64                | 13            | 15            | 8             | 33                | -                   | 36                  | 35                   | -                 | -                      | 2,018            |
| Lianyungang         | -                 | -             | -             | -             | -                 | -                   | -                   | -                    | -                 | -                      | -                |
| Linzhou             | 121               | 49            | 17            | 2             | 43                | 8                   | 41                  | 25                   | -                 | 1                      | 3,626            |
| Qidong              | 224               | 48            | 31            | 50            | 177               | 7                   | 91                  | 147                  | 4                 | 3                      | 5,369            |
| Sihui               | 47                | 12            | 6             | 8             | 28                | -                   | 12                  | 20                   | -                 | -                      | 763              |
| Taixing             | 116               | 37            | 21            | 23            | 54                | 4                   | 44                  | 6                    | -                 | -                      | 4,894            |
| Yangzhong           | 68                | 33            | 8             | 3             | 5                 | -                   | 10                  | 13                   | -                 | -                      | 1,892            |
| Zhongshan           | 296               | 105           | 65            | 82            | 71                | 13                  | 94                  | 169                  | 10                | 7                      | 3,629            |
| Cyprus *            | 388               | 26            | 38            | 316           | 26                | 3                   | 38                  | 194                  | 7                 | 8                      | 1,591            |
| Hong Kong *         | -                 | -             | -             | -             | -                 | -                   | -                   | -                    | -                 | -                      | -                |
| Indian registries   | 172               | 136           | 42            | 36            | 35                | 3                   | 33                  | 70                   | 13                | -                      | 1,085            |
| Guwahati            | -                 | 40            | -             | -             | -                 | -                   | -                   | -                    | -                 | -                      | 40               |
| Karunagappally      | 172               | 96            | 42            | 36            | 35                | 3                   | 33                  | 70                   | 13                | -                      | 1,045            |
| Iran (Golestan)     | -                 | -             | -             | -             | -                 | -                   | -                   | -                    | -                 | -                      | -                |
| Israel *            | 16,690            | 920           | 2,008         | 10,162        | 1,675             | 270                 | 2,767               | 10,034               | 259               | 219                    | 78,578           |
| Japanese registries | 39,080            | 7,241         | 7,281         | 27,592        | 2,871             | 307                 | 6,565               | 16,360               | 381               | 149                    | 401,828          |
| Aichi               | 3,915             | 775           | 763           | 3,023         | 305               | 32                  | 1,013               | 1,859                | 31                | 11                     | 37,759           |
| Akita               | -                 | -             | -             | -             | -                 | -                   | -                   | -                    | -                 | -                      | -                |
| Ehime               | -                 | -             | -             | -             | -                 | -                   | -                   | -                    | -                 | -                      | -                |
| Fukui               | 556               | 103           | 117           | 564           | 46                | 8                   | 137                 | 339                  | 3                 | 1                      | 6,897            |
| Gunma               | 285               | 45            | 72            | 731           | 16                | 1                   | 159                 | 170                  | 5                 | -                      | 3,939            |
| Hiroshima           | 1,091             | 203           | 187           | 1,189         | 88                | 8                   | 360                 | 573                  | 10                | 9                      | 12,043           |
| Hyogo               | -                 | -             | -             | -             | -                 | -                   | -                   | -                    | -                 | -                      | -                |
| Ibaraki             | -                 | -             | -             | -             | -                 | -                   | -                   | -                    | -                 | -                      | -                |
| Kanagawa            | 10,997            | 2,432         | 2,333         | 8,235         | 683               | 47                  | 798                 | 3,441                | 74                | 19                     | 106,056          |
| Miyagi              | 4,401             | 564           | 700           | 4,217         | 354               | 42                  | 934                 | 2,063                | 39                | 8                      | 44,532           |
| Niigata             | 3,973             | 633           | 724           | 2,213         | 249               | 34                  | 862                 | 1,907                | 51                | 18                     | 45,433           |
| Osaka               | 13,010            | 2,336         | 2,210         | 6,240         | 1,051             | 129                 | 2,099               | 5,591                | 165               | 78                     | 133,627          |
| Saga                | -                 | -             | -             | -             | -                 | -                   | -                   | -                    | -                 | -                      | -                |
| Tochigi             | -                 | -             | -             | -             | -                 | -                   | -                   | -                    | -                 | -                      | -                |
| Yamagata            | 852               | 150           | 175           | 1,180         | 79                | 6                   | 203                 | 417                  | 3                 | 5                      | 11,542           |
| Yamanashi           | -                 | -             | -             | -             | -                 | -                   | -                   | -                    | -                 | -                      | -                |
| Jordan *            | 2,772             | 155           | -             | 701           | 478               | 149                 | 552                 | 1,886                | 238               | 160                    | 11,049           |
| Korea * ‡           | 38,357            | 21,331        | 7,132         | 10,983        | 4,752             | 802                 | 9,306               | 16,311               | 1,195             | 601                    | 440,523          |
| Kuwait *            | 628               | 62            | 62            | 116           | 67                | 18                  | 84                  | 375                  | 83                | 48                     | 2,261            |
| Malaysia (Penang)   | 1,213             | 400           | 256           | 189           | 109               | 27                  | 151                 | 333                  | 50                | 18                     | 5,322            |
| Mongolia *          | 1                 | -             | -             | -             | -                 | -                   | -                   | -                    | -                 | -                      | 1                |
| Qatar *             | 326               | 49            | 42            | 68            | 49                | 12                  | 93                  | 220                  | 21                | 29                     | 1,451            |
| Singapore *         | 6,032             | 1,010         | 933           | 1,597         | 273               | 56                  | 788                 | 1,761                | 142               | 53                     | 29,807           |
| Taiwan *            | 26,301            | 12,077        | 4,348         | 11,783        | 2,523             | 421                 | 4,153               | 10,274               | 661               | 299                    | 227,906          |
| Thai registries     | 5,355             | 4,091         | 1,266         | 846           | 739               | 99                  | 1,189               | 1,828                | 188               | 48                     | 39,471           |
| Bangkok             | 2,310             | 1,294         | 462           | 339           | 418               | 29                  | 506                 | 438                  | 37                | 7                      | 14,353           |
| Khon Kaen           | 777               | 695           | 267           | 104           | 95                | 22                  | 166                 | 249                  | 60                | 11                     | 8,804            |
| Lampang             | 641               | 581           | 150           | 122           | 46                | 10                  | 156                 | 327                  | 23                | 7                      | 5,474            |
| Lamphun             | 316               | 396           | 76            | 44            | 25                | 9                   | 54                  | 148                  | 10                | 6                      | 2,362            |
| Lopburi             | 614               | 526           | 118           | 90            | 74                | 7                   | 152                 | 227                  | 21                | 5                      | 3,981            |
| Songkhla            | 697               | 599           | 193           | 147           | 81                | 22                  | 155                 | 439                  | 37                | 12                     | 4,497            |
| Turkish registries  | 3,537             | 470           | 544           | 1,746         | 704               | 90                  | 648                 | 1,629                | 132               | 77                     | 22,526           |
| Ankara              | -                 | -             | -             | -             | -                 | -                   | -                   | -                    | -                 | -                      | -                |
| Antalya             | -                 | -             | -             | -             | -                 | -                   | -                   | -                    | -                 | -                      | -                |
| Bursa               | -                 | -             | -             | -             | -                 | -                   | -                   | -                    | -                 | -                      | -                |
| Edirne              | -                 | -             | -             | -             | -                 | -                   | -                   | -                    | -                 | -                      | -                |

Web-table 3.1 Number of patients included in survival analyses, by continent, country and registry: patients diagnosed during 2000-2004

|                                | Breast<br>(women) | Cervix        | Ovary          | Prostate       | Brain<br>(adults) | Brain<br>(children) | Myeloid<br>(adults) | Lymphoid<br>(adults) | ALL<br>(children) | Lymphoma<br>(children) | Total            |
|--------------------------------|-------------------|---------------|----------------|----------------|-------------------|---------------------|---------------------|----------------------|-------------------|------------------------|------------------|
| Erzurum                        | -                 | -             | -              | -              | -                 | -                   | -                   | -                    | -                 | -                      | -                |
| Eskisehir                      | -                 | -             | -              | -              | -                 | -                   | -                   | -                    | -                 | -                      | -                |
| Izmir                          | 3,537             | 470           | 544            | 1,746          | 704               | 90                  | 648                 | 1,629                | 132               | 77                     | 22,526           |
| Samsun                         | -                 | -             | -              | -              | -                 | -                   | -                   | -                    | -                 | -                      | -                |
| Trabzon                        | -                 | -             | -              | -              | -                 | -                   | -                   | -                    | -                 | -                      | -                |
| <b>EUROPE</b>                  | <b>807,514</b>    | <b>89,307</b> | <b>131,173</b> | <b>655,303</b> | <b>88,598</b>     | <b>7,947</b>        | <b>120,973</b>      | <b>347,406</b>       | <b>9,780</b>      | <b>5,112</b>           | <b>4,440,088</b> |
| Austria *                      | 23,903            | 2,529         | 4,256          | 27,131         | 2,324             | -                   | 2,284               | 10,409               | -                 | -                      | 137,174          |
| Belarus (Childhood) †          | -                 | -             | -              | -              | -                 | 214                 | -                   | -                    | 235               | 159                    | 608              |
| Belgium *                      | 9,591             | 628           | 969            | 9,720          | 778               | 67                  | 1,413               | 3,624                | 68                | 56                     | 46,774           |
| Bulgaria *                     | 16,901            | 5,270         | 3,934          | 6,475          | -                 | -                   | 1,590               | 4,425                | 152               | 115                    | 82,371           |
| Croatia *                      | 10,607            | 1,792         | 2,527          | 5,594          | 2,358             | 145                 | 1,674               | 4,833                | 161               | 70                     | 69,586           |
| Czech Republic *               | 26,772            | 5,204         | 6,685          | 17,439         | 3,261             | 148                 | 2,036               | 11,129               | 200               | 113                    | 169,640          |
| Denmark *                      | 19,373            | 1,955         | 3,074          | 12,387         | 2,576             | 171                 | 2,586               | 7,829                | 208               | 60                     | 102,591          |
| Estonia *                      | 2,937             | 795           | 778            | 2,397          | 438               | 45                  | 512                 | 1,498                | 33                | 17                     | 20,474           |
| Finland *                      | 18,549            | 804           | 2,631          | 20,243         | 1,808             | 166                 | 1,555               | 7,323                | 191               | 82                     | 87,568           |
| French registries              | 32,819            | 2,120         | 3,498          | 35,384         | 2,920             | 1,673               | 6,799               | 16,377               | 1,792             | 1,018                  | 174,692          |
| Bas-Rhin                       | 4,015             | 247           | 418            | 4,332          | 348               | -                   | 692                 | 1,667                | -                 | -                      | 20,490           |
| Basse Normandie                | -                 | -             | -              | -              | -                 | -                   | 736                 | 1,502                | -                 | -                      | 2,238            |
| Burgundy Digestive             | -                 | -             | -              | -              | -                 | -                   | -                   | -                    | -                 | -                      | 5,995            |
| Calvados                       | 2,455             | 159           | 274            | 2,421          | 169               | -                   | 160                 | 356                  | -                 | -                      | 7,606            |
| Calvados Digestive             | -                 | -             | -              | -              | -                 | -                   | -                   | -                    | -                 | -                      | 3,373            |
| Côte-d'Or Gynaecologic         | 1,828             | 126           | 171            | -              | -                 | -                   | -                   | -                    | -                 | -                      | 2,125            |
| Côte-d'Or Haematopoietic       | -                 | -             | -              | -              | -                 | -                   | 402                 | 942                  | -                 | -                      | 1,344            |
| Doubs                          | 1,751             | 129           | 226            | 2,053          | 156               | -                   | 375                 | 799                  | -                 | -                      | 9,325            |
| Finistère                      | -                 | -             | -              | -              | -                 | -                   | -                   | -                    | -                 | -                      | -                |
| Gironde CNS                    | -                 | -             | -              | -              | 490               | -                   | -                   | -                    | -                 | -                      | 490              |
| Gironde General                | -                 | -             | -              | -              | -                 | -                   | -                   | -                    | -                 | -                      | -                |
| Gironde Haematopoietic         | -                 | -             | -              | -              | -                 | -                   | 719                 | 1,392                | -                 | -                      | 2,111            |
| Haut-Rhin                      | 2,660             | 190           | 313            | 3,011          | 191               | -                   | 368                 | 1,202                | -                 | -                      | 13,856           |
| Haute-Vienne                   | -                 | -             | -              | -              | -                 | -                   | -                   | -                    | -                 | -                      | -                |
| Hérault                        | 3,955             | 314           | 396            | 4,622          | 300               | -                   | 740                 | 1,582                | -                 | -                      | 19,715           |
| Isère                          | 4,102             | 212           | 438            | 4,256          | 372               | -                   | 768                 | 1,723                | -                 | -                      | 20,197           |
| Lille Metro                    | -                 | -             | -              | -              | -                 | -                   | -                   | -                    | -                 | -                      | -                |
| Loire-Atlantique               | 6,787             | 353           | 608            | 8,014          | 481               | -                   | 927                 | 3,358                | -                 | -                      | 33,653           |
| Manche                         | 1,775             | 127           | 250            | 2,324          | 145               | -                   | 153                 | 345                  | -                 | -                      | 9,233            |
| Somme                          | 2,116             | 159           | 256            | 2,241          | 135               | -                   | 384                 | 887                  | -                 | -                      | 10,344           |
| Tarn                           | 1,375             | 104           | 148            | 2,110          | 133               | -                   | 375                 | 622                  | -                 | -                      | 8,114            |
| France Childhood Haem †        | -                 | -             | -              | -              | -                 | -                   | -                   | -                    | 1,792             | 1,018                  | 2,810            |
| France Childhood Solid †       | -                 | -             | -              | -              | -                 | 1,673               | -                   | -                    | -                 | -                      | 1,673            |
| German registries              | 84,023            | 8,283         | 12,231         | 76,045         | 7,721             | 176                 | 11,320              | 34,406               | 234               | 127                    | 454,423          |
| Brandenburg                    | 7,571             | 968           | 1,155          | 7,420          | 830               | -                   | 986                 | 3,495                | -                 | -                      | 44,451           |
| Bremen                         | 2,864             | 279           | 399            | 2,138          | 211               | 14                  | 399                 | 1,026                | 13                | 5                      | 14,629           |
| Hamburg                        | 6,391             | 528           | 905            | 5,240          | 506               | -                   | 979                 | 2,519                | -                 | -                      | 32,127           |
| Lower Saxony                   | 11,686            | 882           | 1,578          | 12,938         | 767               | 31                  | 1,764               | 4,369                | 77                | 57                     | 63,278           |
| Mecklenburg-W. Pomerania       | 5,023             | 649           | 824            | 4,600          | 516               | -                   | 804                 | 2,540                | -                 | -                      | 30,610           |
| Rhineland Palatinate           | 13,549            | 982           | 1,741          | 11,693         | 1,359             | 110                 | 1,485               | 4,128                | 118               | 58                     | 68,012           |
| Saarland                       | 3,931             | 376           | 593            | 3,755          | 404               | 5                   | 286                 | 1,497                | 10                | 1                      | 22,174           |
| Saxony                         | 13,984            | 1,728         | 2,443          | 12,203         | 1,594             | -                   | 2,294               | 6,599                | -                 | -                      | 82,065           |
| Schleswig-Holstein             | 11,772            | 976           | 1,526          | 10,636         | 851               | 16                  | 1,257               | 5,076                | 16                | 6                      | 58,966           |
| Thuringia                      | 7,252             | 915           | 1,067          | 5,422          | 683               | -                   | 1,066               | 3,157                | -                 | -                      | 38,111           |
| Gibraltar *                    | 63                | 6             | 6              | 20             | 3                 | -                   | 2                   | 6                    | -                 | -                      | 188              |
| Greece (National Paediatric) † | -                 | -             | -              | -              | -                 | -                   | -                   | -                    | 347               | 129                    | 476              |
| Iceland *                      | 794               | 80            | 100            | 929            | 110               | 10                  | 97                  | 324                  | 9                 | 2                      | 4,373            |
| Ireland *                      | 10,542            | 983           | 1,655          | 10,365         | 1,411             | 127                 | 2,000               | 5,181                | 146               | 80                     | 59,035           |
| Italian registries             | 84,419            | 4,847         | 10,889         | 66,884         | 9,175             | 546                 | 15,000              | 41,119               | 700               | 437                    | 472,560          |
| Alto Adige                     | 1,460             | 120           | 203            | 1,786          | 146               | 8                   | 331                 | 748                  | 18                | 6                      | 9,322            |
| Barletta-Andria-Trani          | -                 | -             | -              | -              | -                 | -                   | -                   | -                    | -                 | -                      | -                |
| Basilicata                     | -                 | -             | -              | -              | -                 | -                   | -                   | -                    | -                 | -                      | -                |
| Bergamo                        | -                 | -             | -              | -              | -                 | -                   | -                   | -                    | -                 | -                      | -                |
| Biella-Vercelli                | 841               | 65            | 117            | 740            | 72                | -                   | 206                 | 445                  | -                 | -                      | 4,928            |
| Brescia                        | 4,761             | 278           | 533            | 3,598          | 378               | 23                  | 423                 | 1,940                | 24                | 18                     | 24,329           |
| Brindisi                       | -                 | -             | -              | -              | -                 | -                   | -                   | -                    | -                 | -                      | -                |
| Caserta                        | -                 | -             | -              | -              | -                 | -                   | -                   | -                    | -                 | -                      | -                |
| Catania-Messina-Enna           | 2,234             | 141           | 310            | 1,656          | 244               | 9                   | 591                 | 1,284                | 31                | 14                     | 12,359           |
| Catanzaro                      | 258               | 18            | 41             | 198            | 41                | 3                   | 90                  | 166                  | 2                 | -                      | 1,519            |
| Como                           | 896               | 49            | 113            | 805            | 116               | 6                   | 162                 | 443                  | 9                 | 2                      | 5,147            |
| Cremona                        | -                 | -             | -              | -              | -                 | -                   | -                   | -                    | -                 | -                      | -                |
| Ferrara                        | 1,781             | 82            | 193            | 1,306          | 177               | 7                   | 348                 | 870                  | 3                 | 4                      | 10,146           |
| Friuli-Venezia-Giulia          | 5,581             | 309           | 677            | 5,077          | 499               | 21                  | 443                 | 2,486                | 34                | 20                     | 31,029           |
| Genoa                          | 4,644             | 308           | 650            | 3,726          | 510               | 22                  | 1,144               | 2,293                | 18                | 11                     | 26,333           |
| Latina                         | 1,329             | 124           | 196            | 946            | 176               | 15                  | 235                 | 654                  | 17                | 14                     | 7,808            |
| Lecce                          | 1,032             | 71            | 161            | 719            | 146               | 7                   | 214                 | 462                  | 10                | 6                      | 5,744            |
| Mantova                        | 1,777             | 83            | 222            | 1,260          | 155               | 4                   | 153                 | 738                  | 11                | 9                      | 9,126            |
| Milano                         | 7,311             | 373           | 854            | 5,419          | 589               | 22                  | 1,159               | 3,209                | 44                | 20                     | 38,197           |
| Modena                         | 2,827             | 153           | 374            | 2,667          | 292               | 14                  | 556                 | 1,480                | 16                | 18                     | 16,138           |
| Monza-Brianza                  | -                 | -             | -              | -              | -                 | -                   | -                   | -                    | -                 | -                      | -                |
| Naples                         | 1,206             | 82            | 159            | 491            | 204               | 34                  | 291                 | 661                  | 18                | 16                     | 7,065            |
| Nuoro                          | 238               | 5             | 42             | 208            | 36                | 4                   | 72                  | 164                  | 2                 | 5                      | 1,501            |
| Palermo                        | 1,356             | 108           | 199            | 986            | 188               | 15                  | 333                 | 695                  | 8                 | 7                      | 7,679            |
| Parma                          | 1,906             | 94            | 238            | 1,541          | 250               | 14                  | 349                 | 1,013                | 8                 | 7                      | 11,367           |
| Pavia                          | 1,014             | 63            | 124            | 683            | 82                | 2                   | 94                  | 522                  | 7                 | 5                      | 5,665            |
| Piacenza                       | -                 | -             | -              | -              | -                 | -                   | -                   | -                    | -                 | -                      | -                |
| Ragusa                         | 801               | 62            | 138            | 652            | 136               | 14                  | 344                 | 449                  | 10                | 6                      | 4,989            |
| Reggio Emilia                  | 2,053             | 89            | 243            | 1,495          | 204               | 11                  | 368                 | 1,087                | 11                | 10                     | 11,231           |
| Romagna                        | 4,457             | 286           | 596            | 4,183          | 578               | 26                  | 679                 | 2,498                | 35                | 24                     | 27,921           |
| Salerno                        | 2,650             | 213           | 443            | 1,686          | 439               | 25                  | 652                 | 1,699                | 34                | 21                     | 16,037           |
| Sassari                        | 1,515             | 81            | 172            | 1,046          | 150               | 9                   | 253                 | 799                  | 9                 | 8                      | 7,716            |

Web-table 3.1 Number of patients included in survival analyses, by continent, country and registry: patients diagnosed during 2000-2004

|                              | Breast<br>(women) | Cervix         | Ovary          | Prostate         | Brain<br>(adults) | Brain<br>(children) | Myeloid<br>(adults) | Lymphoid<br>(adults) | ALL<br>(children) | Lymphoma<br>(children) | Total             |
|------------------------------|-------------------|----------------|----------------|------------------|-------------------|---------------------|---------------------|----------------------|-------------------|------------------------|-------------------|
| Siracusa                     | 1,044             | 81             | 145            | 650              | 146               | 6                   | 229                 | 550                  | 13                | 10                     | 5,784             |
| Sondrio                      | 703               | 44             | 108            | 667              | 60                | 1                   | 73                  | 345                  | 3                 | -                      | 4,166             |
| Taranto                      | -                 | -              | -              | -                | -                 | -                   | -                   | -                    | -                 | -                      | -                 |
| Trapani                      | 715               | 50             | 114            | 444              | 105               | 5                   | 166                 | 376                  | 12                | 6                      | 3,828             |
| Trento                       | 1,843             | 85             | 244            | 1,190            | 178               | 13                  | 202                 | 808                  | 22                | 5                      | 9,356             |
| Turin                        | 4,042             | 217            | 524            | 3,351            | 417               | -                   | 646                 | 1,950                | -                 | -                      | 22,278            |
| Tuscany                      | 5,130             | 294            | 651            | 3,608            | 691               | 34                  | 1,473               | 2,307                | 32                | 20                     | 29,629            |
| Umbria                       | 3,318             | 201            | 508            | 2,918            | 411               | 11                  | 725                 | 1,759                | 35                | 14                     | 20,583            |
| Varese                       | 3,611             | 175            | 406            | 3,238            | 360               | 17                  | 335                 | 1,627                | 27                | 22                     | 19,165            |
| Veneto                       | 10,085            | 443            | 1,191          | 7,944            | 999               | 33                  | 1,661               | 4,592                | 50                | 47                     | 54,175            |
| Viterbo                      | -                 | -              | -              | -                | -                 | -                   | -                   | -                    | -                 | -                      | -                 |
| Piedmont Childhood           | -                 | -              | -              | -                | -                 | 111                 | -                   | -                    | 127               | 62                     | 300               |
| Latvia *                     | 3,866             | 951            | 1,253          | 2,647            | 379               | 39                  | 615                 | 655                  | 49                | -                      | 20,805            |
| Lithuania *                  | 6,422             | 2,507          | 2,161          | 7,076            | 1,084             | 65                  | 1,113               | 3,559                | 105               | 51                     | 48,905            |
| Malta *                      | 1,026             | 40             | 191            | 540              | 105               | 10                  | 148                 | 391                  | 16                | 7                      | 4,499             |
| Netherlands *                | 60,662            | 3,219          | 6,300          | 39,395           | 5,164             | 469                 | 7,764               | 22,798               | 591               | 249                    | 283,065           |
| Norway *                     | 13,776            | 1,444          | 2,447          | 14,866           | 1,682             | 175                 | 2,337               | 7,076                | 179               | 77                     | 81,210            |
| Poland *                     | 62,196            | 17,532         | 16,782         | 30,196           | 11,248            | 774                 | 6,620               | 27,811               | 800               | 493                    | 391,640           |
| Greater Poland               | 5,995             | 1,349          | 1,429          | 2,565            | 786               | 87                  | 595                 | 2,478                | 98                | 61                     | 32,979            |
| Holy Cross                   | 2,092             | 622            | 535            | 1,616            | 526               | 30                  | 320                 | 1,291                | 39                | 26                     | 15,889            |
| Kuiavia-Pomerania            | 3,547             | 911            | 910            | 1,386            | 572               | 40                  | 249                 | 1,432                | 47                | 18                     | 19,749            |
| Lesser Poland                | 5,132             | 1,467          | 1,627          | 2,810            | 958               | 93                  | 560                 | 2,636                | 98                | 45                     | 34,759            |
| Łódź                         | 3,645             | 1,128          | 1,195          | 1,514            | 729               | 44                  | 433                 | 1,525                | 31                | 25                     | 23,208            |
| Lower Silesia                | 5,342             | 1,470          | 1,439          | 2,259            | 1,143             | 35                  | 611                 | 2,062                | -                 | 12                     | 34,882            |
| Lublin                       | 3,094             | 901            | 921            | 1,552            | 651               | 61                  | 443                 | 1,849                | 60                | 38                     | 20,336            |
| Lubush                       | 1,337             | 450            | 306            | 474              | 226               | 21                  | 121                 | 475                  | 11                | 8                      | 8,749             |
| Mazovia                      | 9,305             | 2,293          | 1,963          | 4,819            | 1,408             | 85                  | 822                 | 4,116                | 132               | 88                     | 52,948            |
| Opole                        | 1,592             | 488            | 520            | 752              | 262               | 19                  | 142                 | 674                  | 17                | 5                      | 10,910            |
| Podlaha                      | 1,627             | 561            | 480            | 822              | 364               | 27                  | 220                 | 801                  | 33                | 18                     | 10,877            |
| Pomerania                    | 3,777             | 1,168          | 1,080          | 1,743            | 569               | 33                  | 453                 | 1,447                | 22                | 12                     | 22,429            |
| Silesia                      | 7,962             | 2,244          | 2,274          | 4,050            | 1,601             | 98                  | 843                 | 3,363                | 97                | 63                     | 53,235            |
| Subcarpathia                 | 2,639             | 853            | 897            | 1,962            | 679               | 41                  | 448                 | 1,765                | 55                | 36                     | 20,754            |
| Varmia-Mazuria               | 2,107             | 652            | 524            | 874              | 332               | 28                  | 105                 | 757                  | 31                | 22                     | 13,072            |
| West Pomerania               | 3,003             | 975            | 682            | 998              | 442               | 32                  | 255                 | 1,140                | 29                | 16                     | 16,864            |
| Portugal *                   | 21,307            | 3,209          | 2,290          | 20,488           | 2,205             | 184                 | 2,984               | 9,625                | 237               | 178                    | 121,149           |
| Azores                       | 468               | 86             | 73             | 508              | 47                | 10                  | 109                 | 247                  | 10                | 9                      | 2,975             |
| Portugal Central             | 1,836             | 264            | 150            | 2,007            | -                 | -                   | 198                 | 742                  | 24                | 17                     | 9,630             |
| Portugal North               | 6,432             | 1,167          | 622            | 6,123            | 779               | 53                  | 719                 | 2,632                | 66                | 72                     | 39,040            |
| Portugal South               | 12,571            | 1,692          | 1,445          | 11,850           | 1,379             | 121                 | 1,958               | 6,004                | 137               | 80                     | 69,504            |
| Romania (Cluj)               | -                 | -              | -              | -                | -                 | -                   | -                   | -                    | -                 | -                      | -                 |
| Russian registries ‡         | 9,571             | 2,346          | 2,695          | 2,994            | 1,003             | 89                  | 995                 | 2,482                | 96                | 70                     | 59,916            |
| Arkhangelsk                  | 1,766             | 494            | 579            | 484              | 236               | 31                  | 214                 | 697                  | 23                | 22                     | 14,056            |
| Karelia                      | 1,118             | 277            | 306            | 250              | 147               | 15                  | 201                 | 221                  | 1                 | 5                      | 7,586             |
| Omsk                         | 939               | 413            | 357            | 430              | 70                | 11                  | -                   | -                    | -                 | -                      | 5,966             |
| Samara                       | 5,748             | 1,162          | 1,453          | 1,830            | 550               | 32                  | 580                 | 1,564                | 72                | 43                     | 32,308            |
| Tomsk                        | -                 | -              | -              | -                | -                 | -                   | -                   | -                    | -                 | -                      | -                 |
| Slovakia *                   | 9,200             | 2,618          | 2,089          | 4,812            | 1,362             | 147                 | 1,537               | 4,511                | 130               | 91                     | 60,681            |
| Slovenia *                   | 5,167             | 1,000          | 953            | 3,550            | 658               | 37                  | 843                 | 2,329                | 49                | 40                     | 31,782            |
| Spanish registries           | 19,968            | 1,874          | 2,850          | 21,335           | 3,030             | 441                 | 4,114               | 11,395               | 598               | 373                    | 130,456           |
| Basque Country               | 5,601             | 403            | 786            | 7,247            | 988               | 27                  | 987                 | 3,219                | 50                | 31                     | 40,061            |
| Canaries                     | 3,339             | 442            | 423            | 3,392            | 489               | 29                  | 446                 | 2,065                | 37                | 25                     | 19,400            |
| Girona                       | 1,707             | 132            | 225            | 1,936            | 255               | 19                  | 461                 | 933                  | 14                | 18                     | 11,028            |
| Granada                      | 1,720             | 160            | 278            | 1,284            | 285               | 19                  | 356                 | 921                  | 17                | 8                      | 10,338            |
| Mallorca                     | 1,618             | 215            | 236            | 1,555            | 225               | 10                  | 499                 | 946                  | 16                | 11                     | 10,760            |
| Murcia                       | 2,623             | 274            | 425            | 2,469            | 334               | 28                  | 646                 | 1,496                | 44                | 23                     | 16,707            |
| Navarra                      | 1,548             | 74             | 250            | 1,750            | 246               | 13                  | 272                 | 818                  | 16                | 9                      | 10,188            |
| Tarragona                    | 1,812             | 174            | 227            | 1,702            | 208               | 12                  | 447                 | 997                  | 16                | 8                      | 11,062            |
| Spain Childhood              | -                 | -              | -              | -                | -                 | 202                 | -                   | -                    | 275               | 182                    | 659               |
| Valencia Childhood           | -                 | -              | -              | -                | -                 | 82                  | -                   | -                    | 113               | 58                     | 253               |
| Sweden *                     | 32,347            | 2,233          | 4,246          | 41,966           | 2,683             | 240                 | 2,521               | 13,395               | 314               | 97                     | 163,354           |
| Swiss registries             | 12,435            | 684            | 1,597          | 12,455           | 1,213             | 193                 | 2,053               | 5,762                | 224               | 110                    | 65,396            |
| Basel                        | 1,003             | 54             | 108            | 1,135            | 69                | -                   | 84                  | 394                  | -                 | -                      | 5,103             |
| Fribourg                     | -                 | -              | -              | -                | -                 | -                   | -                   | -                    | -                 | -                      | -                 |
| Geneva                       | 1,913             | 61             | 203            | 1,465            | 157               | -                   | 315                 | 702                  | -                 | -                      | 8,541             |
| Graubünden-Glarus            | 720               | 52             | 105            | 764              | 99                | -                   | 152                 | 355                  | -                 | -                      | 4,089             |
| Neuchâtel                    | 677               | 17             | 106            | 629              | 55                | -                   | 68                  | 251                  | -                 | -                      | 3,431             |
| St Gallen-Appenzell          | 1,416             | 103            | 237            | 1,807            | 182               | -                   | 278                 | 763                  | -                 | -                      | 8,670             |
| Ticino                       | 1,157             | 85             | 169            | 846              | 106               | -                   | 191                 | 648                  | -                 | -                      | 6,377             |
| Valais                       | 1,046             | 51             | 148            | 1,002            | 97                | -                   | 129                 | 454                  | -                 | -                      | 5,305             |
| Zürich and Zug               | 4,503             | 261            | 521            | 4,807            | 448               | -                   | 836                 | 2,195                | -                 | -                      | 23,353            |
| Switzerland Childhood †      | -                 | -              | -              | -                | -                 | 193                 | -                   | -                    | 224               | 110                    | 527               |
| United Kingdom *             | 208,278           | 14,354         | 32,086         | 161,970          | 21,899            | 1,596               | 38,461              | 87,134               | 1,916             | 811                    | 1,094,697         |
| England                      | 173,980           | 11,691         | 26,057         | 136,795          | 17,945            | 1,324               | 34,211              | 71,078               | 1,581             | 665                    | 902,772           |
| Northern Ireland             | 4,951             | 393            | 812            | 3,466            | 611               | 64                  | 1,316               | 2,334                | 62                | 29                     | 26,964            |
| Scotland                     | 18,271            | 1,449          | 3,439          | 12,186           | 2,096             | 128                 | 1,868               | 5,585                | 186               | 73                     | 105,006           |
| Wales                        | 11,076            | 821            | 1,778          | 9,523            | 1,247             | 80                  | 1,066               | 5,137                | 87                | 44                     | 59,955            |
| <b>OCEANIA</b>               | <b>72,476</b>     | <b>4,603</b>   | <b>8,227</b>   | <b>78,530</b>    | <b>7,918</b>      | <b>585</b>          | <b>15,124</b>       | <b>39,770</b>        | <b>1,059</b>      | <b>383</b>             | <b>448,786</b>    |
| Australia *                  | 60,921            | 3,709          | 6,707          | 64,559           | 6,775             | 489                 | 13,182              | 33,279               | 878               | 335                    | 375,960           |
| Australian Capital Territory | 981               | 57             | 103            | 875              | 98                | 9                   | 170                 | 415                  | 13                | 8                      | 4,804             |
| New South Wales              | 19,959            | 1,231          | 2,214          | 21,937           | 2,110             | 126                 | 3,934               | 11,029               | 268               | 104                    | 123,592           |
| Northern Territory           | 304               | 43             | 38             | 251              | 38                | 5                   | 35                  | 132                  | 4                 | 2                      | 1,740             |
| Queensland                   | 12,265            | 875            | 1,345          | 12,510           | 1,529             | 148                 | 3,181               | 6,285                | 197               | 71                     | 78,606            |
| South Australia              | 5,070             | 234            | 530            | 5,597            | 526               | 18                  | 928                 | 3,195                | 67                | 25                     | 31,399            |
| Tasmania                     | 1,539             | 98             | 163            | 1,747            | 174               | 20                  | 289                 | 847                  | 17                | 6                      | 9,852             |
| Victoria                     | 15,241            | 751            | 1,729          | 15,798           | 1,705             | 123                 | 3,374               | 8,417                | 229               | 84                     | 91,658            |
| Western Australia            | 5,562             | 420            | 585            | 5,844            | 595               | 40                  | 1,271               | 2,959                | 83                | 35                     | 34,309            |
| New Zealand *                | 11,555            | 894            | 1,520          | 13,971           | 1,143             | 96                  | 1,942               | 6,491                | 181               | 48                     | 72,826            |
| <b>Total</b>                 | <b>1,962,987</b>  | <b>218,125</b> | <b>278,027</b> | <b>1,780,119</b> | <b>190,475</b>    | <b>20,590</b>       | <b>313,208</b>      | <b>903,692</b>       | <b>26,824</b>     | <b>13,003</b>          | <b>11,278,528</b> |

Web-table 3.2: Number of patients included in survival analyses, by continent, country and registry: patients diagnosed during 2005-2009

Back

|                                    | Oesophagus    | Stomach       | Colon          | Rectum         | Liver         | Pancreas       | Lung           | Melanoma<br>of skin |
|------------------------------------|---------------|---------------|----------------|----------------|---------------|----------------|----------------|---------------------|
| <b>AFRICA</b>                      | <b>1,014</b>  | <b>877</b>    | <b>1,002</b>   | <b>652</b>     | <b>331</b>    | <b>156</b>     | <b>1,296</b>   | <b>162</b>          |
| Algerian registries                | 37            | 474           | 559            | 337            | 133           | 134            | 810            | 118                 |
| Annaba                             | 8             | 87            | 101            | 47             | 26            | 44             | 97             | 13                  |
| Sétif                              | -             | 174           | 283            | 181            | 81            | 50             | 520            | 105                 |
| Tlemcen                            | 29            | 213           | 175            | 109            | 26            | 40             | 193            | -                   |
| Mali (Bamako)                      | -             | -             | -              | -              | -             | -              | -              | -                   |
| Mauritius *                        | -             | 359           | 310            | 176            | -             | -              | 383            | -                   |
| Morocco (Casablanca)               | -             | -             | -              | -              | -             | -              | -              | -                   |
| Nigeria (Ibadan)                   | -             | -             | 91             | 106            | 130           | -              | -              | 35                  |
| South Africa (Eastern Cape)        | 977           | 44            | 42             | 33             | 68            | 22             | 103            | 9                   |
| <b>AMERICA (Central and South)</b> | <b>5,546</b>  | <b>24,194</b> | <b>32,784</b>  | <b>10,396</b>  | <b>3,900</b>  | <b>6,258</b>   | <b>22,686</b>  | <b>3,378</b>        |
| Argentinian registries             | 595           | 1,317         | 2,978          | 893            | 446           | 852            | 2,592          | 510                 |
| Chubut                             | -             | 59            | 151            | 22             | 15            | 20             | 113            | 8                   |
| Córdoba                            | 271           | 495           | 1,268          | 383            | 204           | 397            | 1,212          | 228                 |
| Mendoza                            | 324           | 722           | 1,495          | 488            | 227           | 435            | 1,205          | 274                 |
| Tierra del Fuego                   | -             | 41            | 64             | -              | -             | -              | 62             | -                   |
| Argentina (Childhood) †            | -             | -             | -              | -              | -             | -              | -              | -                   |
| Brazilian registries               | 2,549         | 5,631         | 9,154          | 4,140          | 388           | 1,949          | 2,043          | 600                 |
| Aracaju                            | 52            | 178           | 230            | 118            | 42            | 57             | 249            | 89                  |
| Cuiabá                             | -             | -             | -              | -              | -             | -              | -              | -                   |
| Curitiba                           | 399           | 860           | 1,195          | 575            | 222           | 319            | 947            | 472                 |
| Goiânia                            | 187           | -             | -              | -              | 115           | 166            | 734            | -                   |
| Jaú                                | 36            | 81            | 132            | 53             | 9             | 51             | 113            | 39                  |
| São Paulo                          | 1,875         | 4,512         | 7,597          | 3,394          | -             | 1,356          | -              | -                   |
| Chilean registries                 | 514           | 2,597         | 1,180          | 468            | 340           | 455            | 1,341          | 336                 |
| Antofagasta                        | 73            | 323           | 237            | 88             | 72            | 91             | 681            | 59                  |
| Biobio                             | 136           | 649           | 203            | 95             | 58            | 109            | 140            | 58                  |
| Concepción                         | 193           | 1,100         | 523            | 170            | 140           | 182            | 381            | 148                 |
| Los Rios                           | 112           | 525           | 217            | 115            | 70            | 73             | 139            | 71                  |
| Colombian registries               | 247           | 3,134         | 1,465          | 753            | 453           | 436            | 1,498          | 528                 |
| Bucaramanga                        | -             | 662           | -              | -              | -             | -              | -              | 110                 |
| Cali                               | 193           | 1,729         | 1,204          | 563            | 384           | 358            | 1,214          | 330                 |
| Manizales                          | 33            | 366           | 180            | 128            | 22            | 20             | 186            | 33                  |
| Pasto                              | 21            | 377           | 81             | 62             | 47            | 58             | 98             | 55                  |
| Costa Rica *                       | 207           | 3,287         | 1,996          | 701            | 455           | 467            | 1,053          | 482                 |
| Cuba *                             | -             | 2,412         | 5,287          | -              | -             | -              | 7,533          | -                   |
| Ecuadorian registries              | 198           | 2,816         | 1,218          | 660            | 541           | 408            | 1,048          | 413                 |
| Cuenca Ecuador                     | 10            | 146           | 39             | 26             | 44            | 38             | 59             | 18                  |
| Guayaquil                          | 62            | 887           | 482            | 288            | 216           | 146            | 429            | 101                 |
| Loja                               | 5             | 250           | 85             | 28             | 40            | 29             | 60             | 26                  |
| Manabí                             | 46            | 502           | 148            | 67             | 60            | 45             | 124            | 29                  |
| Quito                              | 75            | 1,031         | 464            | 251            | 181           | 150            | 376            | 239                 |
| Guadeloupe *                       | 38            | 148           | 228            | 60             | 35            | 52             | 106            | 17                  |
| Martinique *                       | 62            | 397           | 581            | 181            | 87            | 196            | 302            | 63                  |
| Mexico (Childhood) †               | -             | -             | -              | -              | -             | -              | -              | -                   |
| Peru (Lima)                        | -             | -             | -              | -              | -             | -              | -              | -                   |
| Puerto Rico *                      | 726           | 1,590         | 6,545          | 1,669          | 1,038         | 826            | 2,945          | 429                 |
| Uruguay *                          | 410           | 865           | 2,152          | 871            | 117           | 617            | 2,225          | -                   |
| <b>AMERICA (North)</b>             | <b>70,991</b> | <b>99,144</b> | <b>522,668</b> | <b>165,383</b> | <b>89,129</b> | <b>165,515</b> | <b>924,699</b> | <b>249,108</b>      |
| Canadian registries                | 6,178         | 11,118        | 55,996         | 20,344         | 6,579         | 13,669         | 78,412         | 21,511              |
| Alberta                            | 754           | 1,235         | 5,905          | 2,370          | 906           | 1,751          | 8,722          | 2,290               |
| British Columbia                   | 1,125         | 1,800         | 9,099          | 3,804          | 1,306         | 2,470          | 13,479         | 3,928               |
| Manitoba                           | 263           | 586           | 2,984          | 1,072          | 323           | 666            | 4,171          | 745                 |
| New Brunswick                      | 232           | 421           | 2,132          | 564            | 150           | 563            | 3,487          | 733                 |
| Newfoundland & Labrador            | 126           | 445           | 1,824          | 638            | 94            | 239            | 1,896          | 385                 |
| Nova Scotia                        | 306           | 479           | 2,817          | 1,037          | 190           | 645            | 4,205          | 1,112               |
| Ontario                            | 3,095         | 5,665         | 28,456         | 9,754          | 3,394         | 6,586          | 38,453         | 11,484              |
| Prince Edward Island               | 45            | 53            | 387            | 132            | 28            | 96             | 602            | 175                 |
| Saskatchewan                       | 232           | 434           | 2,392          | 973            | 188           | 653            | 3,397          | 659                 |
| US registries                      | 64,813        | 88,026        | 466,672        | 145,039        | 82,550        | 151,846        | 846,287        | 227,597             |
| Alabama                            | 1,259         | 1,551         | 9,756          | 2,745          | 1,209         | 2,837          | 18,636         | 4,797               |
| Alaska                             | 139           | 179           | 927            | 300            | 192           | 275            | 1,642          | 291                 |
| Arkansas                           | 652           | 875           | 5,658          | 1,740          | 733           | 1,616          | 12,321         | 2,131               |
| California                         | 6,559         | 13,147        | 55,182         | 18,518         | 14,618        | 19,010         | 83,593         | 33,344              |
| Greater Bay Area                   | 1,274         | 2,635         | 10,938         | 3,504          | 3,334         | 3,808          | 15,320         | 6,462               |
| Greater California                 | 3,881         | 6,209         | 29,697         | 10,112         | 7,332         | 10,550         | 49,647         | 20,797              |
| Los Angeles                        | 1,404         | 4,300         | 14,429         | 4,887          | 3,954         | 4,652          | 18,531         | 5,858               |
| Colorado                           | 940           | 1,137         | 6,524          | 2,190          | 1,268         | 2,202          | 9,954          | 4,968               |
| Connecticut                        | 1,067         | 1,618         | 7,020          | 2,196          | 1,218         | 2,682          | 12,521         | 4,361               |
| Delaware                           | 250           | 319           | 1,750          | 552            | 275           | 582            | 3,616          | 1,157               |
| Florida                            | 5,411         | 6,758         | 38,549         | 11,013         | 6,373         | 12,797         | 74,860         | 19,541              |
| Georgia                            | 1,962         | 2,705         | 14,521         | 4,832          | 2,350         | 4,664          | 28,577         | 8,880               |
| Atlanta                            | 532           | 877           | 4,080          | 1,466          | 809           | 1,342          | 6,714          | 3,165               |

Web-table 3.2: Number of patients included in survival analyses, by continent, country and registry: patients diagnosed during 2005-2009

|                     | Oesophagus    | Stomach        | Colon          | Rectum         | Liver          | Pancreas      | Lung           | Melanoma<br>of skin |
|---------------------|---------------|----------------|----------------|----------------|----------------|---------------|----------------|---------------------|
| Hawaii              | 271           | 790            | 2,535          | 911            | 708            | 890           | 3,662          | 1,305               |
| Idaho               | 351           | 356            | 2,220          | 781            | 293            | 787           | 3,781          | 1,662               |
| Indiana             | 1,858         | 1,694          | 12,484         | 3,914          | 1,638          | 3,741         | 25,049         | 5,497               |
| Iowa                | 909           | 942            | 6,888          | 1,931          | 740            | 1,995         | 11,404         | 3,189               |
| Kentucky            | 1,186         | 1,293          | 9,425          | 3,077          | 1,169          | 2,644         | 22,120         | 4,908               |
| Louisiana           | 1,156         | 1,747          | 8,805          | 2,854          | 1,466          | 2,738         | 16,442         | 3,011               |
| Maine               | 543           | 445            | 2,993          | 908            | 368            | 955           | 5,985          | 1,672               |
| Massachusetts       | 2,305         | 2,498          | 12,697         | 3,945          | 2,415          | 4,399         | 23,946         | 7,676               |
| Michigan            | 2,959         | 3,514          | 18,672         | 5,768          | 2,943          | 6,722         | 37,312         | 9,160               |
| Detroit             | 1,100         | 1,729          | 7,859          | 2,328          | 1,400          | 3,000         | 15,612         | 3,044               |
| Minnesota           | 1,363         | 1,384          | 8,818          | 2,964          | 1,043          | 2,608         | 14,049         | 5,903               |
| Mississippi         | 738           | 1,014          | 6,027          | 1,683          | 792            | 1,723         | 11,648         | 2,241               |
| Missouri            | -             | -              | -              | -              | -              | -             | -              | -                   |
| Montana             | 285           | 282            | 1,855          | 641            | 203            | 574           | 3,395          | 1,037               |
| Nebraska            | 471           | 492            | 3,897          | 1,197          | 396            | 1,102         | 5,695          | 1,626               |
| New Hampshire       | 538           | 396            | 2,431          | 802            | 315            | 865           | 4,792          | 1,879               |
| New Jersey          | 2,245         | 3,902          | 17,873         | 5,132          | 2,841          | 5,951         | 28,788         | 9,202               |
| New Mexico          | 391           | 722            | 3,035          | 1,085          | 798            | 1,034         | 4,418          | 1,806               |
| New York            | 5,333         | 8,989          | 37,643         | 11,320         | 7,567          | 13,315        | 63,283         | -                   |
| New York City       | 1,674         | 4,541          | 14,668         | 4,472          | 3,970          | 5,005         | 19,908         | -                   |
| North Carolina      | 2,263         | 2,743          | 16,319         | 5,170          | 2,518          | 5,139         | 33,841         | 9,615               |
| Ohio                | 3,453         | 3,785          | 23,541         | 7,193          | 3,005          | 7,400         | 45,274         | 11,698              |
| Oklahoma            | 884           | 1,036          | 7,129          | 2,131          | 1,093          | 2,020         | 14,681         | 3,261               |
| Oregon              | 1,134         | 1,019          | 6,497          | 2,262          | 1,254          | 2,352         | 12,787         | 4,925               |
| Pennsylvania        | 4,063         | 5,192          | 29,495         | 8,649          | 4,352          | 9,182         | 50,158         | 12,185              |
| Rhode Island        | 391           | 439            | 2,238          | 665            | 404            | 672           | 4,247          | 1,155               |
| South Carolina      | 1,267         | 1,561          | 8,340          | 2,484          | 1,203          | 2,766         | 16,967         | 5,107               |
| Tennessee           | 1,516         | 1,900          | 12,039         | 3,673          | 1,594          | 3,375         | 25,700         | 6,541               |
| Texas               | 4,446         | 7,120          | 35,234         | 10,956         | 8,855          | 10,816        | 61,407         | 14,251              |
| Utah                | 330           | 415            | 2,638          | 922            | 408            | 975           | 2,726          | 2,945               |
| Vermont             | 204           | 144            | 1,122          | 412            | 171            | 436           | 2,484          | 983                 |
| Washington          | 1,289         | 1,540          | 8,125          | 2,886          | 1,759          | 3,064         | 15,580         | 6,174               |
| Seattle             | 1,104         | 1,397          | 7,013          | 2,541          | 1,853          | 2,721         | 13,430         | 5,812               |
| West Virginia       | 605           | 632            | 4,528          | 1,400          | 471            | 1,181         | 9,915          | 1,918               |
| Wisconsin           | 1,702         | 1,622          | 10,353         | 2,961          | 1,414          | 3,486         | 17,639         | 5,050               |
| Wyoming             | 125           | 129            | 889            | 276            | 118            | 274           | 1,392          | 545                 |
| <b>ASIA</b>         | <b>84,610</b> | <b>381,164</b> | <b>270,372</b> | <b>140,166</b> | <b>234,504</b> | <b>78,601</b> | <b>368,015</b> | <b>11,849</b>       |
| Chinese registries  | 32,688        | 41,302         | 14,441         | 13,303         | 33,139         | 7,953         | 56,802         | 562                 |
| Beijing             | 3,263         | 7,132          | 7,269          | 5,050          | 7,016          | 3,086         | 20,734         | 233                 |
| Changle             | 336           | 1,988          | 158            | 175            | 912            | 71            | 734            | 17                  |
| Cixian              | 3,417         | 1,778          | 144            | 190            | 612            | 57            | 1,119          | 8                   |
| Dafeng              | 1,523         | 1,623          | 210            | 321            | 1,105          | 244           | 1,613          | 3                   |
| Dalian              | 777           | 3,948          | 1,981          | 1,891          | 2,716          | 1,048         | 6,998          | 90                  |
| Donghai             | 1,029         | 1,310          | 256            | 258            | 1,395          | 149           | 2,046          | 7                   |
| Feicheng            | 3,452         | 1,869          | 136            | 313            | 924            | 101           | 1,583          | 4                   |
| Ganyu               | 2,031         | 945            | 106            | 388            | 876            | 160           | 1,488          | 16                  |
| Guanyun             | 1,279         | 943            | 146            | 286            | 1,471          | 151           | 1,465          | 6                   |
| Haimen              | 956           | 2,279          | 589            | 733            | 2,768          | 560           | 3,718          | 43                  |
| Haining             | 385           | 667            | 418            | 279            | 737            | 326           | 1,633          | 13                  |
| Jianhu              | 3,085         | 3,729          | 67             | 298            | 1,322          | 209           | 1,423          | 15                  |
| Jiashan             | 318           | 727            | 453            | 312            | 722            | 293           | 1,264          | 14                  |
| Jintan              | 1,119         | 1,857          | 193            | 232            | 357            | 122           | 671            | 7                   |
| Lianyungang         | 327           | 396            | 159            | 177            | 417            | 77            | 718            | 4                   |
| Linzhou             | 4,051         | 3,568          | 217            | 324            | 675            | 78            | 744            | 15                  |
| Qidong              | 712           | 2,338          | 504            | 887            | 4,421          | 718           | 3,763          | 21                  |
| Sihui               | 115           | 168            | 162            | 160            | 691            | 45            | 671            | 9                   |
| Taixing             | 2,377         | 1,689          | 156            | 197            | 1,856          | 168           | 1,038          | 10                  |
| Yangzhong           | 1,329         | 1,727          | 145            | 170            | 292            | 44            | 320            | 8                   |
| Zhongshan           | 807           | 621            | 972            | 662            | 1,854          | 246           | 3,059          | 19                  |
| Cyprus *            | 42            | 355            | 1,132          | 335            | 98             | 206           | 980            | 240                 |
| Hong Kong *         | -             | -              | 13,414         | 6,086          | -              | -             | -              | -                   |
| Indian registries   | 109           | 98             | 66             | 73             | 77             | 50            | 244            | 4                   |
| Guwahati            | -             | -              | -              | -              | -              | -             | -              | -                   |
| Karunagappally      | 109           | 98             | 66             | 73             | 77             | 50            | 244            | 4                   |
| Iran (Golestan)     | 412           | 353            | 216            | 58             | -              | -             | -              | -                   |
| Israel *            | 630           | 3,432          | 12,678         | 3,474          | 880            | 2,817         | 9,161          | 4,521               |
| Japanese registries | 27,672        | 167,979        | 107,222        | 45,476         | 56,269         | 34,667        | 123,783        | 1,819               |
| Aichi               | 3,539         | 22,105         | 15,875         | 7,263          | 7,821          | 5,383         | 19,533         | 287                 |
| Akita               | -             | -              | -              | -              | -              | -             | -              | -                   |
| Ehime               | 452           | 3,944          | 2,101          | 985            | 1,781          | 839           | 3,039          | 48                  |
| Fukui               | 424           | 4,470          | 2,549          | 1,099          | 1,410          | 1,018         | 3,228          | 36                  |
| Gunma               | 983           | 5,802          | 3,986          | 1,843          | 2,139          | 1,291         | 5,040          | 71                  |
| Hiroshima           | 1,616         | 11,642         | 7,348          | 3,207          | 5,076          | 2,310         | 8,307          | 87                  |
| Hyogo               | 2,140         | 9,682          | 5,859          | 2,386          | 4,406          | 2,334         | 9,721          | 157                 |
| Ibaraki             | 1,203         | 8,571          | 5,233          | 2,453          | 2,644          | 1,776         | 6,432          | 103                 |
| Kanagawa            | 5,070         | 29,496         | 19,030         | 8,036          | 7,306          | 4,975         | 17,524         | 327                 |

Web-table 3.2: Number of patients included in survival analyses, by continent, country and registry: patients diagnosed during 2005-2009

|                          | Oesophagus     | Stomach        | Colon          | Rectum         | Liver          | Pancreas       | Lung           | Melanoma<br>of skin |
|--------------------------|----------------|----------------|----------------|----------------|----------------|----------------|----------------|---------------------|
| Miyagi                   | 2,055          | 11,209         | 7,024          | 2,836          | 2,474          | 2,196          | 7,515          | 129                 |
| Niigata                  | 2,526          | 15,764         | 9,370          | 3,482          | 2,610          | 2,729          | 9,120          | 117                 |
| Osaka                    | 4,973          | 26,233         | 17,546         | 7,545          | 12,892         | 6,103          | 22,093         | 269                 |
| Saga                     | 443            | 3,068          | 1,881          | 670            | 1,614          | 645            | 2,238          | 37                  |
| Tochigi                  | 950            | 6,205          | 3,961          | 1,711          | 1,994          | 1,244          | 4,412          | 72                  |
| Yamagata                 | 1,088          | 8,318          | 4,422          | 1,494          | 1,469          | 1,475          | 4,557          | 56                  |
| Yamanashi                | 210            | 1,470          | 1,037          | 466            | 633            | 349            | 1,024          | 23                  |
| Jordan *                 | 111            | 661            | 1,768          | 610            | 191            | 281            | 1,406          | 69                  |
| Korea * ‡                | 10,197         | 134,964        | 63,827         | 42,313         | 73,345         | 19,422         | 84,400         | 1,998               |
| Kuwait *                 | 24             | 79             | 325            | 130            | 106            | 91             | 191            | 7                   |
| Malaysia (Penang)        | 112            | 414            | 941            | 486            | 399            | 222            | 1,099          | -                   |
| Mongolia *               | -              | -              | -              | -              | -              | -              | -              | -                   |
| Qatar *                  | 35             | 104            | 250            | 103            | 136            | 53             | 225            | 14                  |
| Singapore *              | 467            | 2,210          | 5,783          | 2,032          | 2,300          | 1,106          | 5,896          | 130                 |
| Taiwan *                 | 9,211          | 18,364         | 34,956         | 19,029         | 54,330         | 7,216          | 47,197         | 995                 |
| Thai registries          | 1,252          | 2,105          | 5,606          | 2,571          | 11,356         | 1,364          | 11,229         | 258                 |
| Bangkok                  | 591            | 1,023          | 3,361          | 1,306          | 4,807          | 890            | 5,685          | 112                 |
| Khon Kaen                | 67             | 228            | 630            | 332            | 3,196          | 79             | 1,111          | 47                  |
| Lampang                  | 53             | 188            | 424            | 247            | 1,322          | 124            | 1,690          | 19                  |
| Lamphun                  | 31             | 130            | 249            | 134            | 414            | 71             | 949            | 17                  |
| Lopburi                  | 153            | 391            | 468            | 234            | 969            | 71             | 781            | 34                  |
| Songkhla                 | 357            | 145            | 474            | 318            | 648            | 129            | 1,013          | 29                  |
| Turkish registries       | 1,648          | 8,744          | 7,747          | 4,087          | 1,878          | 3,153          | 25,402         | 1,232               |
| Ankara                   | 408            | 2,394          | 1,979          | 1,042          | 542            | 784            | 4,976          | 323                 |
| Antalya                  | 88             | 364            | 640            | 309            | 174            | 328            | 1,763          | 144                 |
| Bursa                    | 152            | 1,201          | 831            | 546            | 188            | 426            | 3,593          | 132                 |
| Edirne                   | 18             | 205            | 188            | 108            | 45             | 67             | 784            | 25                  |
| Erzurum                  | 336            | 734            | 244            | 75             | 40             | 100            | 693            | 40                  |
| Eskisehir                | 61             | 355            | 429            | 216            | 71             | 180            | 1,119          | -                   |
| Izmir                    | 424            | 2,154          | 2,516          | 1,278          | 621            | 926            | 9,729          | 405                 |
| Samsun                   | 114            | 718            | 543            | 305            | 106            | 198            | 1,726          | 87                  |
| Trabzon                  | 47             | 619            | 377            | 208            | 91             | 144            | 1,019          | 76                  |
| <b>EUROPE</b>            | <b>105,366</b> | <b>248,387</b> | <b>664,537</b> | <b>295,299</b> | <b>109,870</b> | <b>188,427</b> | <b>847,469</b> | <b>233,402</b>      |
| Austria *                | 1,815          | 6,501          | 15,752         | 7,992          | 3,471          | 6,116          | 19,017         | 6,104               |
| Belarus (Childhood) †    | -              | -              | -              | -              | -              | -              | -              | -                   |
| Belgium *                | 4,513          | 6,884          | 27,667         | 12,201         | 2,686          | 5,970          | 36,208         | 8,546               |
| Bulgaria *               | -              | 7,598          | 13,530         | 7,778          | 2,090          | -              | 17,305         | 1,918               |
| Croatia *                | 1,025          | 4,802          | 9,199          | 5,320          | 1,829          | 2,930          | 13,972         | 2,796               |
| Czech Republic *         | 2,623          | 8,170          | 27,970         | 11,663         | 4,009          | 9,440          | 31,846         | 9,363               |
| Denmark *                | 2,032          | 2,767          | 13,440         | 7,537          | 1,398          | 4,537          | 20,941         | 8,269               |
| Estonia *                | 313            | 2,045          | 2,564          | 1,144          | 382            | 1,097          | 3,492          | 777                 |
| Finland *                | 1,204          | 3,303          | 8,469          | 4,305          | 1,848          | 4,519          | 10,703         | 4,785               |
| French registries        | 5,062          | 6,783          | 27,135         | 10,268         | 7,802          | 8,333          | 26,607         | 7,262               |
| Bas-Rhin                 | 420            | 548            | 2,367          | 925            | 700            | 756            | 2,853          | 1,078               |
| Basse Normandie          | -              | -              | -              | -              | -              | -              | -              | -                   |
| Burgundy Digestive       | 425            | 711            | 2,766          | 883            | 676            | 900            | -              | -                   |
| Calvados                 | -              | -              | -              | -              | -              | -              | 1,989          | -                   |
| Calvados Digestive       | 342            | 357            | 1,346          | 620            | 531            | 524            | -              | -                   |
| Côte-d'Or Gynaecologic   | -              | -              | -              | -              | -              | -              | -              | -                   |
| Côte-d'Or Haematopoietic | -              | -              | -              | -              | -              | -              | -              | -                   |
| Doubs                    | 154            | 275            | 1,068          | 416            | 286            | 381            | 1,425          | 439                 |
| Finistère                | 712            | 698            | 2,304          | 907            | 742            | 579            | -              | -                   |
| Gironde CNS              | -              | -              | -              | -              | -              | -              | -              | -                   |
| Gironde General          | 263            | 428            | 1,994          | 716            | 445            | 553            | 2,499          | 634                 |
| Gironde Haematopoietic   | -              | -              | -              | -              | -              | -              | -              | -                   |
| Haut-Rhin                | 255            | 432            | 1,673          | 613            | 345            | 428            | 1,913          | 809                 |
| Haute-Vienne             | 27             | 49             | 199            | 80             | 35             | 65             | 165            | 62                  |
| Hérault                  | 331            | 536            | 2,463          | 858            | 667            | 851            | 3,042          | 604                 |
| Isère                    | 319            | 615            | 2,409          | 820            | 747            | 855            | 3,098          | 986                 |
| Lille Metro              | 167            | 121            | 613            | 230            | 180            | 183            | 900            | 223                 |
| Loire-Atlantique         | 886            | 1,012          | 4,464          | 1,777          | 1,646          | 1,166          | 4,500          | 1,778               |
| Manche                   | 301            | 452            | 1,210          | 538            | 319            | 373            | 1,406          | 381                 |
| Somme                    | 324            | 343            | 1,194          | 480            | 301            | 383            | 1,703          | -                   |
| Tarn                     | 136            | 206            | 1,065          | 405            | 182            | 336            | 1,114          | 268                 |
| France Childhood Haem †  | -              | -              | -              | -              | -              | -              | -              | -                   |
| France Childhood Solid † | -              | -              | -              | -              | -              | -              | -              | -                   |
| German registries        | 10,425         | 28,731         | 74,120         | 37,911         | 10,696         | 21,808         | 81,075         | 30,089              |
| Brandenburg              | 921            | 2,629          | 6,085          | 3,481          | 1,008          | 2,066          | 7,586          | 1,979               |
| Bremen                   | 332            | 622            | 1,856          | 916            | 246            | 664            | 2,663          | 686                 |
| Hamburg                  | 762            | 1,372          | 3,755          | 1,826          | 685            | 1,369          | 5,719          | 1,712               |
| Lower Saxony             | 2,817          | 7,423          | 21,321         | 9,535          | 2,254          | 5,155          | 20,656         | 9,374               |
| Mecklenburg-W. Pomerania | 702            | 1,962          | 3,886          | 2,135          | 731            | 1,426          | 5,297          | 1,423               |
| Rhineland Palatinate     | 1,250          | 3,366          | 10,155         | 4,915          | 1,374          | 2,410          | 9,656          | 5,075               |
| Saarland                 | 375            | 1,035          | 2,998          | 1,532          | 483            | 782            | 3,710          | 947                 |
| Saxony                   | 1,559          | 5,250          | 11,234         | 6,604          | 2,235          | 4,095          | 11,353         | 3,692               |

**Web-table 3.2: Number of patients included in survival analyses, by continent, country and registry: patients diagnosed during 2005-2009**

|                                | Oesophagus | Stomach | Colon  | Rectum | Liver  | Pancreas | Lung    | Melanoma<br>of skin |
|--------------------------------|------------|---------|--------|--------|--------|----------|---------|---------------------|
| Schleswig-Holstein             | 1,041      | 2,688   | 7,335  | 3,753  | 691    | 1,919    | 8,394   | 3,011               |
| Thuringia                      | 666        | 2,384   | 5,495  | 3,214  | 989    | 1,922    | 6,041   | 2,190               |
| Gibraltar *                    | 5          | 14      | 50     | 15     | 4      | 10       | 50      | 17                  |
| Greece (National Paediatric) † | -          | -       | -      | -      | -      | -        | -       | -                   |
| Iceland *                      | 95         | 153     | 501    | 193    | 57     | 147      | 778     | 250                 |
| Ireland *                      | 1,804      | 2,421   | 8,053  | 3,207  | 791    | 2,219    | 9,506   | 3,377               |
| Italian registries             | 5,701      | 37,240  | 93,437 | 26,126 | 30,908 | 27,420   | 97,550  | 23,175              |
| Alto Adige                     | 127        | 642     | 1,218  | 439    | 399    | 454      | 1,154   | 639                 |
| Barletta-Andria-Trani          | 12         | 267     | 663    | 170    | 442    | 160      | 691     | 175                 |
| Basilicata                     | 69         | 545     | 1,204  | 426    | 585    | 319      | 1,100   | 210                 |
| Bergamo                        | 160        | 1,096   | 1,976  | 491    | 1,091  | 750      | 2,157   | 555                 |
| Biella-Vercelli                | 84         | 333     | 1,129  | 323    | 344    | 321      | 1,329   | 296                 |
| Brescia                        | 230        | 1,354   | 2,503  | 611    | 1,363  | 915      | 2,810   | 661                 |
| Brindisi                       | 20         | 186     | 531    | 172    | 220    | 144      | 683     | 125                 |
| Caserta                        | 26         | 342     | 708    | 194    | 389    | 183      | 953     | 146                 |
| Catania-Messina-Enna           | 141        | 1,669   | 4,652  | 1,303  | 1,250  | 1,267    | 4,714   | 777                 |
| Catanzaro                      | 34         | 409     | 764    | 265    | 226    | 151      | 660     | 161                 |
| Como                           | 92         | 858     | 1,829  | 429    | 664    | 560      | 1,884   | 541                 |
| Cremona                        | 126        | 799     | 1,168  | 305    | 552    | 457      | 1,315   | 229                 |
| Ferrara                        | 81         | 498     | 1,882  | 427    | 443    | 458      | 1,795   | 258                 |
| Friuli-Venezia-Giulia          | 451        | 1,877   | 4,444  | 1,348  | 1,410  | 1,452    | 4,248   | 1,312               |
| Genoa                          | 217        | 1,032   | 3,737  | 1,073  | 905    | 994      | 3,933   | 929                 |
| Latina                         | 60         | 566     | 1,293  | 375    | 317    | 333      | 1,620   | 456                 |
| Lecce                          | 101        | 560     | 1,577  | 521    | 581    | 440      | 2,193   | 265                 |
| Mantova                        | 95         | 590     | 1,560  | 428    | 380    | 426      | 1,498   | 295                 |
| Milano                         | 566        | 3,048   | 8,410  | 2,425  | 2,895  | 2,562    | 9,333   | 2,352               |
| Modena                         | 91         | 951     | 2,563  | 598    | 561    | 672      | 2,572   | 591                 |
| Monza-Brianza                  | 111        | 730     | 1,747  | 428    | 558    | 485      | 1,570   | 461                 |
| Naples                         | 71         | 644     | 1,544  | 404    | 1,321  | 404      | 2,108   | 312                 |
| Nuoro                          | 53         | 216     | 551    | 154    | 309    | 189      | 491     | 59                  |
| Palermo                        | 94         | 837     | 2,930  | 836    | 1,103  | 786      | 3,031   | 488                 |
| Parma                          | 104        | 841     | 1,672  | 358    | 696    | 572      | 1,564   | 437                 |
| Pavia                          | 139        | 804     | 2,005  | 520    | 904    | 542      | 2,244   | 339                 |
| Piacenza                       | 41         | 433     | 935    | 200    | 375    | 305      | 894     | 177                 |
| Ragusa                         | 32         | 341     | 1,124  | 376    | 375    | 315      | 1,078   | 195                 |
| Reggio Emilia                  | 90         | 736     | 1,514  | 419    | 365    | 541      | 1,857   | 388                 |
| Romagna                        | 163        | 2,499   | 4,655  | 1,214  | 778    | 1,346    | 4,617   | 1,254               |
| Salerno                        | 100        | 864     | 2,418  | 611    | 885    | 564      | 2,806   | 453                 |
| Sassari                        | 104        | 345     | 1,145  | 318    | 429    | 389      | 1,274   | 164                 |
| Siracusa                       | 35         | 292     | 930    | 250    | 359    | 276      | 969     | 173                 |
| Sondrio                        | 62         | 286     | 577    | 148    | 232    | 220      | 665     | 139                 |
| Taranto                        | 36         | 382     | 1,111  | 281    | 440    | 280      | 1,307   | 261                 |
| Trapani                        | 48         | 289     | 949    | 255    | 236    | 307      | 1,063   | 246                 |
| Trento                         | 184        | 543     | 1,486  | 341    | 488    | 523      | 1,201   | 320                 |
| Turin                          | 205        | 941     | 3,335  | 960    | 893    | 859      | 3,457   | 779                 |
| Tuscany                        | 156        | 2,039   | 4,118  | 1,364  | 819    | 1,135    | 4,225   | 1,530               |
| Umbria                         | 109        | 1,734   | 3,482  | 1,131  | 808    | 897      | 2,958   | 629                 |
| Varese                         | 204        | 1,094   | 2,871  | 720    | 726    | 761      | 2,826   | 786                 |
| Veneto                         | 741        | 2,339   | 7,598  | 2,290  | 2,576  | 2,470    | 7,789   | 2,352               |
| Viterbo                        | 36         | 389     | 929    | 225    | 216    | 236      | 914     | 260                 |
| Piedmont Childhood             | -          | -       | -      | -      | -      | -        | -       | -                   |
| Latvia *                       | 445        | 2,352   | 2,482  | 1,499  | 164    | 349      | 3,453   | 829                 |
| Lithuania *                    | 829        | 4,281   | 4,215  | 3,003  | 650    | 2,032    | 6,778   | 1,249               |
| Malta *                        | 71         | 250     | 694    | 285    | 51     | 217      | 679     | 184                 |
| Netherlands *                  | 8,486      | 9,745   | 42,214 | 17,156 | 1,979  | 9,676    | 53,961  | 19,126              |
| Norway *                       | 946        | 2,465   | 12,070 | 5,295  | 575    | 2,253    | 11,165  | 6,182               |
| Poland *                       | 6,301      | 26,818  | 47,927 | 28,668 | 6,857  | 16,213   | 103,497 | 11,951              |
| Greater Poland                 | 576        | 2,349   | 4,387  | 2,558  | 674    | 1,424    | 8,694   | 1,066               |
| Holy Cross                     | 194        | 980     | 1,633  | 1,070  | 157    | 637      | 3,704   | 416                 |
| Kuiavia-Pomerania              | 354        | 1,533   | 2,713  | 1,617  | 389    | 790      | 6,766   | 547                 |
| Lesser Poland                  | 461        | 2,467   | 3,779  | 2,324  | 582    | 1,450    | 8,208   | 1,149               |
| Łódź                           | 481        | 1,970   | 3,240  | 1,986  | 546    | 1,210    | 7,098   | 930                 |
| Lower Silesia                  | 563        | 2,212   | 4,100  | 2,578  | 849    | 1,507    | 9,242   | 979                 |
| Lublin                         | 289        | 1,300   | 2,621  | 1,647  | 358    | 926      | 5,816   | 592                 |
| Lubush                         | 146        | 729     | 1,337  | 865    | 150    | 402      | 2,680   | 227                 |
| Mazovia                        | 668        | 2,801   | 6,072  | 3,356  | 713    | 1,870    | 12,508  | 1,782               |
| Opole                          | 212        | 778     | 1,431  | 814    | 131    | 398      | 2,616   | 323                 |
| Podlaha                        | 211        | 811     | 1,488  | 909    | 185    | 435      | 2,668   | 260                 |
| Pomerania                      | 395        | 1,480   | 2,960  | 1,555  | 428    | 845      | 6,560   | 742                 |
| Silesia                        | 1,017      | 3,658   | 6,291  | 3,651  | 894    | 2,141    | 12,559  | 1,450               |
| Subcarpathia                   | 263        | 1,616   | 2,227  | 1,568  | 334    | 1,018    | 4,938   | 574                 |
| Varmia-Mazuria                 | 203        | 1,013   | 1,584  | 1,003  | 231    | 498      | 4,403   | 309                 |
| West Pomerania                 | 268        | 1,121   | 2,064  | 1,167  | 236    | 662      | 5,037   | 605                 |
| Portugal *                     | 2,484      | 14,209  | 24,102 | 11,214 | 2,162  | 3,400    | 16,429  | 3,757               |
| Azores                         | 49         | 235     | 337    | 114    | 52     | 126      | 555     | 87                  |
| Portugal Central               | 326        | 2,449   | 4,530  | 2,418  | 463    | 367      | 2,177   | 456                 |
| Portugal North                 | 914        | 5,871   | 7,206  | 3,564  | 667    | 1,034    | 5,665   | 1,025               |
| Portugal South                 | 1,195      | 5,654   | 12,029 | 5,118  | 980    | 1,873    | 8,032   | 2,189               |

Web-table 3.2: Number of patients included in survival analyses, by continent, country and registry: patients diagnosed during 2005-2009

|                              | Oesophagus     | Stomach        | Colon            | Rectum         | Liver          | Pancreas       | Lung             | Melanoma<br>of skin |
|------------------------------|----------------|----------------|------------------|----------------|----------------|----------------|------------------|---------------------|
| Romania (Cluj)               | 102            | 647            | 808              | 367            | 236            | 268            | 1,175            | 215                 |
| Russian registries ‡         | 2,108          | 11,714         | 10,744           | 5,887          | 1,385          | 3,635          | 15,806           | 1,590               |
| Arkhangelsk                  | 607            | 2,498          | 1,779            | 945            | 295            | 688            | 2,594            | 354                 |
| Karelia                      | 313            | 1,154          | 1,043            | 502            | 98             | 332            | 1,432            | 238                 |
| Omsk                         | 253            | 1,978          | 1,993            | 1,211          | 211            | 536            | 3,068            | -                   |
| Samara                       | 712            | 4,733          | 4,893            | 2,653          | 678            | 1,670          | 7,044            | 998                 |
| Tomsk                        | 223            | 1,351          | 1,036            | 576            | 103            | 409            | 1,668            | -                   |
| Slovakia *                   | 1,332          | 4,507          | 11,570           | 5,476          | 1,447          | 3,489          | 11,211           | 3,160               |
| Slovenia *                   | 429            | 2,298          | 4,532            | 2,450          | 719            | 1,544          | 5,853            | 2,100               |
| Spanish registries           | 2,212          | 6,905          | 22,065           | 7,331          | 4,812          | 4,974          | 22,203           | 4,678               |
| Basque Country               | 769            | 2,475          | 6,773            | 2,100          | 1,583          | 1,514          | 6,443            | 1,277               |
| Canaries                     | 428            | 821            | 3,050            | 1,038          | 780            | 779            | 3,386            | 670                 |
| Girona                       | 202            | 583            | 1,863            | 622            | 434            | 343            | 1,813            | 346                 |
| Granada                      | 127            | 619            | 1,860            | 621            | 409            | 403            | 1,903            | 499                 |
| Mallorca                     | 166            | 419            | 1,753            | 610            | 418            | 399            | 2,123            | 387                 |
| Murcia                       | 214            | 905            | 3,078            | 1,013          | 543            | 655            | 3,028            | 724                 |
| Navarra                      | 154            | 605            | 1,603            | 664            | 292            | 431            | 1,633            | 375                 |
| Tarragona                    | 152            | 478            | 2,085            | 663            | 353            | 450            | 1,874            | 400                 |
| Spain Childhood              | -              | -              | -                | -              | -              | -              | -                | -                   |
| Valencia Childhood           | -              | -              | -                | -              | -              | -              | -                | -                   |
| Sweden *                     | 2,034          | 4,383          | 18,747           | 10,051         | 2,154          | 4,354          | 17,286           | 11,936              |
| Swiss registries             | 1,239          | 2,067          | 7,648            | 3,072          | 1,693          | 2,661          | 9,727            | 5,269               |
| Basel                        | 91             | 143            | 638              | 218            | 66             | 123            | 759              | 300                 |
| Fribourg                     | 62             | 111            | 387              | 131            | 69             | 119            | 515              | 302                 |
| Geneva                       | 157            | 211            | 873              | 330            | 262            | 294            | 1,186            | 677                 |
| Graubünden-Glarus            | 76             | 160            | 488              | 188            | 87             | 168            | 591              | 280                 |
| Neuchâtel                    | 59             | 84             | 369              | 185            | 78             | 147            | 546              | 248                 |
| St Gallen-Appenzell          | 156            | 280            | 1,040            | 410            | 191            | 376            | 1,167            | 630                 |
| Ticino                       | 124            | 281            | 775              | 375            | 280            | 297            | 1,006            | 427                 |
| Valais                       | 126            | 177            | 558              | 247            | 217            | 209            | 834              | 408                 |
| Zürich                       | 388            | 620            | 2,520            | 988            | 443            | 928            | 3,123            | 1,997               |
| Switzerland Childhood †      | -              | -              | -                | -              | -              | -              | -                | -                   |
| United Kingdom *             | 39,731         | 38,334         | 132,832          | 57,885         | 17,015         | 38,816         | 199,196          | 54,448              |
| England                      | 32,482         | 31,063         | 108,487          | 47,576         | 13,878         | 32,414         | 159,144          | 45,237              |
| Northern Ireland             | 890            | 1,095          | 3,736            | 1,567          | 374            | 963            | 4,978            | 1,306               |
| Scotland                     | 4,139          | 3,854          | 13,069           | 5,467          | 1,811          | 3,348          | 24,150           | 5,182               |
| Wales                        | 2,220          | 2,322          | 7,540            | 3,275          | 952            | 2,091          | 10,924           | 2,723               |
| <b>OCEANIA</b>               | <b>7,552</b>   | <b>11,511</b>  | <b>61,546</b>    | <b>23,626</b>  | <b>7,118</b>   | <b>13,691</b>  | <b>57,171</b>    | <b>65,895</b>       |
| Australia *                  | 6,287          | 9,746          | 51,519           | 20,005         | 6,091          | 11,804         | 48,714           | 55,227              |
| Australian Capital Territory | 54             | 116            | 688              | 234            | 66             | 121            | 485              | 671                 |
| New South Wales              | 2,019          | 3,215          | 16,836           | 6,643          | 2,228          | 4,069          | 15,966           | 18,010              |
| Northern Territory           | 52             | 40             | 228              | 116            | 50             | 43             | 366              | 250                 |
| Queensland                   | 1,275          | 1,777          | 10,916           | 3,950          | 1,052          | 2,204          | 10,157           | 14,835              |
| South Australia              | 522            | 778            | 4,549            | 1,528          | 480            | 989            | 4,077            | 3,390               |
| Tasmania                     | 206            | 290            | 1,634            | 581            | 123            | 293            | 1,419            | 1,362               |
| Victoria                     | 1,559          | 2,650          | 12,347           | 5,240          | 1,574          | 2,919          | 11,597           | 11,671              |
| Western Australia            | 600            | 880            | 4,321            | 1,713          | 518            | 1,166          | 4,647            | 5,038               |
| New Zealand *                | 1,265          | 1,765          | 10,027           | 3,621          | 1,027          | 1,887          | 8,457            | 10,668              |
| <b>Total</b>                 | <b>275,079</b> | <b>765,277</b> | <b>1,552,909</b> | <b>635,522</b> | <b>444,852</b> | <b>452,648</b> | <b>2,221,336</b> | <b>563,794</b>      |

Web-table 3.2: Number of patients included in survival analyses, by continent, country and registry: patients diagnosed during 2005-2009

|                                    | Breast<br>(women) | Cervix        | Ovary          | Prostate         | Brain<br>(adults) | Brain<br>(children) | Myeloid<br>(adults) | Lymphoid<br>(adults) | ALL<br>(children) | Lymphoma<br>(children) | Total            |
|------------------------------------|-------------------|---------------|----------------|------------------|-------------------|---------------------|---------------------|----------------------|-------------------|------------------------|------------------|
| <b>AFRICA</b>                      | <b>6,722</b>      | <b>2,183</b>  | <b>510</b>     | <b>1,006</b>     | <b>206</b>        | <b>70</b>           | <b>100</b>          | <b>751</b>           | <b>21</b>         | <b>70</b>              | <b>17,129</b>    |
| Algerian registries                | 2,079             | 349           | 165            | 249              | 162               | 48                  | 63                  | 534                  | 16                | 34                     | 6,301            |
| Annaba                             | 469               | 26            | 26             | 63               | -                 | 9                   | 63                  | 200                  | 16                | 15                     | 1,310            |
| Sétif                              | 913               | 179           | 59             | 137              | 42                | 20                  | -                   | 109                  | -                 | -                      | 2,853            |
| Tlemcen                            | 697               | 144           | 80             | 49               | 120               | 19                  | -                   | 225                  | -                 | 19                     | 2,138            |
| Mali (Bamako)                      | -                 | -             | -              | -                | -                 | -                   | -                   | -                    | -                 | -                      | -                |
| Mauritius *                        | 483               | 436           | 244            | 340              | -                 | -                   | -                   | -                    | -                 | -                      | 2,731            |
| Morocco (Casablanca)               | 1,878             | -             | -              | -                | -                 | -                   | -                   | -                    | -                 | -                      | 1,878            |
| Nigeria (Ibadan)                   | 2,008             | 674           | 53             | 265              | 40                | 16                  | 31                  | 157                  | 4                 | 33                     | 3,643            |
| South Africa (Eastern Cape)        | 274               | 724           | 48             | 152              | 4                 | 6                   | 6                   | 60                   | 1                 | 3                      | 2,576            |
| <b>AMERICA (Central and South)</b> | <b>63,036</b>     | <b>18,069</b> | <b>6,540</b>   | <b>47,830</b>    | <b>3,578</b>      | <b>1,694</b>        | <b>4,312</b>        | <b>18,179</b>        | <b>4,179</b>      | <b>1,658</b>           | <b>278,217</b>   |
| Argentinian registries             | 7,294             | 1,199         | 805            | 3,586            | 569               | 939                 | 734                 | 2,160                | 1,738             | 667                    | 29,874           |
| Chubut                             | 192               | 61            | 13             | 17               | 17                | -                   | 9                   | 39                   | -                 | -                      | 736              |
| Córdoba                            | 3,374             | 509           | 396            | 1,636            | 264               | -                   | 202                 | 980                  | -                 | -                      | 11,819           |
| Mendoza                            | 3,596             | 629           | 396            | 1,899            | 288               | -                   | 523                 | 1,141                | -                 | -                      | 13,642           |
| Tierra del Fuego                   | 132               | -             | -              | 34               | -                 | -                   | -                   | -                    | -                 | -                      | 333              |
| Argentina (Childhood) †            | -                 | -             | -              | -                | -                 | 939                 | -                   | -                    | 1,738             | 667                    | 3,344            |
| Brazilian registries               | 20,349            | 1,225         | 477            | 3,155            | 442               | 51                  | 396                 | 1,344                | 100               | 50                     | 54,043           |
| Aracaju                            | 757               | 206           | 96             | 1,078            | 69                | 13                  | 74                  | 237                  | 23                | 10                     | 3,578            |
| Cuiabá                             | -                 | 361           | -              | -                | -                 | -                   | -                   | -                    | -                 | -                      | 361              |
| Curitiba                           | 2,849             | 620           | 354            | 1,902            | 343               | 34                  | 263                 | 1,025                | 72                | 33                     | 12,484           |
| Goiânia                            | 1,650             | -             | -              | -                | -                 | -                   | -                   | -                    | -                 | -                      | 2,852            |
| Jaú                                | 173               | 38            | 27             | 175              | 30                | 4                   | 59                  | 82                   | 5                 | 7                      | 1,114            |
| São Paulo                          | 14,920            | -             | -              | -                | -                 | -                   | -                   | -                    | -                 | -                      | 33,654           |
| Chilean registries                 | 2,267             | 882           | 412            | 2,820            | 278               | 52                  | 406                 | 1,190                | 101               | 44                     | 15,683           |
| Antofagasta                        | 497               | 185           | 63             | 374              | 33                | 13                  | 79                  | 212                  | 23                | 11                     | 3,114            |
| Biobio                             | 353               | 178           | 88             | 588              | 68                | 12                  | 80                  | 226                  | 18                | 5                      | 3,064            |
| Concepción                         | 1,039             | 379           | 176            | 1,188            | 121               | 17                  | 151                 | 523                  | 43                | 21                     | 6,495            |
| Los Rios                           | 378               | 140           | 85             | 670              | 56                | 10                  | 96                  | 229                  | 17                | 7                      | 3,010            |
| Colombian registries               | 3,674             | 1,934         | 648            | 3,155            | 589               | 79                  | 569                 | 1,943                | 130               | 75                     | 21,310           |
| Bucaramanga                        | -                 | 421           | -              | -                | -                 | -                   | -                   | -                    | -                 | -                      | 1,193            |
| Cali                               | 2,926             | 1,099         | 519            | 2,742            | 507               | 62                  | 489                 | 1,531                | 97                | 58                     | 16,005           |
| Manizales                          | 458               | 195           | 61             | 218              | 26                | 7                   | 31                  | 165                  | 17                | 10                     | 2,156            |
| Pasto                              | 290               | 219           | 68             | 195              | 56                | 10                  | 49                  | 247                  | 16                | 7                      | 1,956            |
| Costa Rica *                       | 4,377             | 2,774         | 551            | 4,351            | 376               | 55                  | 313                 | 1,770                | 174               | 44                     | 23,433           |
| Cuba *                             | 12,553            | 5,926         | 1,731          | 7,639            | -                 | -                   | -                   | 2,934                | -                 | 193                    | 46,208           |
| Ecuadorian registries              | 3,364             | 2,238         | 704            | 3,081            | 555               | 138                 | 530                 | 2,422                | 342               | 140                    | 20,816           |
| Cuenca Ecuador                     | 60                | 53            | 33             | 104              | 20                | 12                  | 26                  | 93                   | 21                | 5                      | 807              |
| Guayaquil                          | 1,449             | 1,043         | 275            | 1,047            | 215               | 68                  | 180                 | 866                  | 160               | 75                     | 7,989            |
| Loja                               | 144               | 117           | 37             | 154              | 45                | 3                   | 59                  | 122                  | 5                 | 8                      | 1,217            |
| Manabí                             | 455               | 390           | 86             | 370              | 44                | 19                  | 38                  | 314                  | 68                | 23                     | 2,828            |
| Quito                              | 1,256             | 635           | 273            | 1,406            | 231               | 36                  | 227                 | 1,027                | 88                | 29                     | 7,975            |
| Guadeloupe *                       | 353               | 43            | 40             | 1,044            | 18                | 5                   | 22                  | 172                  | 5                 | 2                      | 2,388            |
| Martinique *                       | 896               | 144           | 82             | 2,704            | 74                | 7                   | 212                 | 507                  | 7                 | 3                      | 6,505            |
| Mexico (Childhood) †               | -                 | -             | -              | -                | -                 | 272                 | -                   | -                    | 1,500             | 395                    | 2,167            |
| Peru (Lima)                        | -                 | -             | -              | -                | -                 | -                   | -                   | -                    | -                 | -                      | -                |
| Puerto Rico *                      | 7,909             | 1,047         | 723            | 13,672           | 677               | 96                  | 1,130               | 3,737                | 82                | 45                     | 44,886           |
| Uruguay *                          | -                 | 657           | 367            | 2,623            | -                 | -                   | -                   | -                    | -                 | -                      | 10,904           |
| <b>AMERICA (North)</b>             | <b>919,823</b>    | <b>58,057</b> | <b>112,245</b> | <b>1,015,738</b> | <b>93,085</b>     | <b>10,186</b>       | <b>188,200</b>      | <b>489,491</b>       | <b>10,859</b>     | <b>4,709</b>           | <b>5,189,030</b> |
| Canadian registries                | 77,928            | 5,305         | 10,361         | 90,750           | 8,363             | 660                 | 13,805              | 45,430               | 862               | 377                    | 467,648          |
| Alberta                            | 8,934             | 765           | 1,040          | 10,486           | 1,091             | 99                  | 1,969               | 5,695                | 127               | 61                     | 54,200           |
| British Columbia                   | 13,724            | 813           | 1,656          | 15,494           | 1,382             | 114                 | 2,515               | 7,898                | 146               | 65                     | 80,818           |
| Manitoba                           | 3,824             | 256           | 491            | 3,402            | 413               | 32                  | 844                 | 2,356                | 42                | 12                     | 22,482           |
| New Brunswick                      | 2,589             | 149           | 317            | 3,719            | 312               | 21                  | 535                 | 1,488                | 27                | 12                     | 17,451           |
| Newfoundland & Labrador            | 1,649             | 127           | 168            | 2,156            | 221               | 8                   | 236                 | 824                  | 16                | 8                      | 11,060           |
| Nova Scotia                        | 3,453             | 220           | 355            | 3,950            | 372               | 16                  | 511                 | 1,853                | 23                | 10                     | 21,554           |
| Ontario                            | 40,119            | 2,728         | 5,867          | 46,883           | 4,169             | 335                 | 6,396               | 22,989               | 440               | 193                    | 237,006          |
| Prince Edward Island               | 440               | 37            | 45             | 681              | 47                | 2                   | 118                 | 276                  | 2                 | 2                      | 3,168            |
| Saskatchewan                       | 3,196             | 210           | 422            | 3,979            | 356               | 33                  | 681                 | 2,051                | 39                | 14                     | 19,909           |
| US registries                      | 841,895           | 52,752        | 101,884        | 924,988          | 84,722            | 9,526               | 174,395             | 444,061              | 9,997             | 4,332                  | 4,721,382        |
| Alabama                            | 15,522            | 1,036         | 1,881          | 18,255           | 1,518             | 159                 | 2,596               | 7,246                | 134               | 69                     | 91,206           |
| Alaska                             | 1,776             | 133           | 196            | 1,744            | 204               | 23                  | 271                 | 837                  | 30                | 16                     | 9,175            |
| Arkansas                           | 8,745             | 722           | 984            | 11,524           | 1,003             | 115                 | 1,731               | 4,779                | 86                | 50                     | 55,465           |
| California                         | 106,337           | 7,274         | 13,414         | 108,744          | 10,313            | 1,308               | 19,610              | 53,669               | 1,795             | 635                    | 567,070          |
| Greater Bay Area                   | 21,277            | 1,085         | 2,655          | 22,809           | 2,010             | 215                 | 3,853               | 11,242               | 291               | 116                    | 112,828          |
| Greater California                 | 57,549            | 3,841         | 7,203          | 59,565           | 5,958             | 763                 | 10,672              | 28,775               | 994               | 361                    | 313,906          |
| Los Angeles                        | 26,098            | 2,348         | 3,555          | 26,370           | 2,339             | 330                 | 5,077               | 13,593               | 511               | 155                    | 138,391          |
| Colorado                           | 14,511            | 787           | 1,837          | 17,047           | 1,552             | 153                 | 2,471               | 7,327                | 214               | 84                     | 75,166           |
| Connecticut                        | 13,119            | 581           | 1,572          | 14,698           | 1,229             | 125                 | 2,701               | 7,278                | 139               | 71                     | 74,196           |
| Delaware                           | 3,097             | 206           | 344            | 4,207            | 298               | 34                  | 511                 | 1,657                | 26                | 21                     | 18,902           |
| Florida                            | 63,447            | 4,579         | 8,175          | 76,033           | 6,629             | 644                 | 17,039              | 35,542               | 575               | 256                    | 388,221          |
| Georgia                            | 27,549            | 1,942         | 3,339          | 32,322           | 2,679             | 363                 | 5,152               | 13,439               | 327               | 153                    | 155,756          |
| Atlanta                            | 9,302             | 592           | 1,072          | 10,855           | 782               | 117                 | 1,456               | 4,404                | 121               | 52                     | 47,738           |
| Hawaii                             | 4,184             | 262           | 472            | 4,270            | 304               | 34                  | 908                 | 1,943                | 47                | 13                     | 23,509           |
| Idaho                              | 4,310             | 222           | 554            | 5,799            | 491               | 42                  | 1,069               | 2,563                | 63                | 23                     | 25,367           |
| Indiana                            | 19,985            | 1,258         | 2,505          | 19,584           | 2,219             | 258                 | 4,202               | 11,148               | 272               | 113                    | 117,419          |
| Iowa                               | 10,084            | 517           | 1,370          | 11,061           | 1,164             | 117                 | 2,637               | 6,425                | 107               | 45                     | 61,525           |
| Kentucky                           | 14,182            | 997           | 1,708          | 14,539           | 1,590             | 166                 | 3,204               | 7,947                | 150               | 70                     | 90,375           |
| Louisiana                          | 13,528            | 1,069         | 1,441          | 17,274           | 1,246             | 157                 | 3,111               | 7,463                | 130               | 67                     | 83,705           |
| Maine                              | 5,210             | 238           | 613            | 5,756            | 514               | 43                  | 1,202               | 3,025                | 44                | 17                     | 30,531           |
| Massachusetts                      | 24,421            | 1,005         | 2,930          | 25,902           | 2,335             | 221                 | 4,280               | 12,238               | 249               | 123                    | 133,585          |
| Michigan                           | 32,759            | 1,875         | 4,139          | 41,170           | 3,661             | 372                 | 7,201               | 18,646               | 342               | 191                    | 197,406          |
| Detroit                            | 13,253            | 828           | 1,704          | 17,236           | 1,282             | 147                 | 3,207               | 7,632                | 118               | 79                     | 81,558           |
| Minnesota                          | 17,214            | 776           | 2,071          | 22,026           | 1,515             | 156                 | 4,038               | 10,089               | 192               | 92                     | 96,301           |
| Mississippi                        | 8,886             | 706           | 968            | 11,446           | 840               | 101                 | 1,625               | 4,574                | 100               | 50                     | 55,162           |
| Missouri                           | 19,974            | -             | -              | -                | -                 | -                   | -                   | -                    | -                 | -                      | 19,974           |
| Montana                            | 3,315             | 147           | 460            | 4,464            | 387               | 23                  | 812                 | 1,826                | 35                | 9                      | 19,750           |
| Nebraska                           | 5,866             | 306           | 667            | 6,620            | 640               | 88                  | 1,218               | 3,466                | 51                | 36                     | 33,834           |

Web-table 3.2: Number of patients included in survival analyses, by continent, country and registry: patients diagnosed during 2005-2009

|                     | Breast<br>(women) | Cervix        | Ovary         | Prostate       | Brain<br>(adults) | Brain<br>(children) | Myeloid<br>(adults) | Lymphoid<br>(adults) | ALL<br>(children) | Lymphoma<br>(children) | Total            |
|---------------------|-------------------|---------------|---------------|----------------|-------------------|---------------------|---------------------|----------------------|-------------------|------------------------|------------------|
| New Hampshire       | 4,836             | 210           | 582           | 5,319          | 505               | 54                  | 1,018               | 2,640                | 55                | 26                     | 27,263           |
| New Jersey          | 30,523            | 2,071         | 4,012         | 36,327         | 2,980             | 323                 | 6,569               | 17,105               | 357               | 151                    | 176,352          |
| New Mexico          | 5,641             | 378           | 710           | 6,860          | 584               | 67                  | 1,335               | 3,013                | 87                | 32                     | 31,996           |
| New York            | 66,316            | 4,384         | 8,601         | 76,158         | 6,546             | 705                 | 14,874              | 38,417               | 680               | 341                    | 364,472          |
| New York City       | 24,143            | 2,203         | 3,138         | 27,072         | 2,284             | 292                 | 4,826               | 13,992               | 277               | 155                    | 132,620          |
| North Carolina      | 30,814            | 1,785         | 3,521         | 34,706         | 2,974             | 326                 | 5,664               | 15,762               | 336               | 149                    | 173,645          |
| Ohio                | 38,999            | 2,392         | 4,753         | 41,273         | 4,017             | 467                 | 6,616               | 20,062               | 366               | 179                    | 224,473          |
| Oklahoma            | 11,923            | 897           | 1,407         | 13,121         | 1,239             | 123                 | 2,497               | 6,298                | 151               | 67                     | 69,958           |
| Oregon              | 13,344            | 676           | 1,684         | 13,824         | 1,437             | 128                 | 2,030               | 6,380                | 159               | 72                     | 71,964           |
| Pennsylvania        | 46,404            | 2,658         | 6,158         | 51,583         | 4,744             | 427                 | 10,586              | 26,136               | 441               | 197                    | 272,610          |
| Rhode Island        | 4,032             | 206           | 487           | 4,127          | 365               | 38                  | 755                 | 2,059                | 28                | 15                     | 22,323           |
| South Carolina      | 15,173            | 980           | 1,611         | 17,894         | 1,530             | 147                 | 2,777               | 7,213                | 121               | 74                     | 87,215           |
| Tennessee           | 20,640            | 1,423         | 2,287         | 21,854         | 2,176             | 246                 | 3,459               | 10,483               | 227               | 91                     | 119,224          |
| Texas               | 63,732            | 5,414         | 7,767         | 66,772         | 7,292             | 1,095               | 16,981              | 35,529               | 1,216             | 483                    | 359,366          |
| Utah                | 5,443             | 295           | 715           | 8,250          | 712               | 153                 | 1,133               | 3,430                | 124               | 54                     | 31,668           |
| Vermont             | 2,350             | 78            | 271           | 2,560          | 297               | 10                  | 413                 | 1,226                | 22                | 13                     | 13,196           |
| Washington          | 17,023            | 858           | 2,198         | 19,227         | 1,947             | 211                 | 3,879               | 9,441                | 209               | 87                     | 95,497           |
| Seattle             | 15,147            | 774           | 1,973         | 16,853         | 1,835             | 189                 | 3,722               | 8,792                | 169               | 69                     | 85,394           |
| West Virginia       | 6,311             | 475           | 817           | 7,264          | 747               | 66                  | 1,424               | 3,800                | 58                | 24                     | 41,636           |
| Wisconsin           | 18,829            | 824           | 2,469         | 21,185         | 2,126             | 220                 | 4,558               | 11,109               | 234               | 69                     | 105,850          |
| Wyoming             | 1,541             | 110           | 194           | 2,199          | 173               | 18                  | 238                 | 831                  | 18                | 4                      | 9,074            |
| <b>ASIA</b>         | <b>274,399</b>    | <b>58,921</b> | <b>42,041</b> | <b>154,057</b> | <b>28,525</b>     | <b>3,276</b>        | <b>54,381</b>       | <b>112,170</b>       | <b>4,234</b>      | <b>2,346</b>           | <b>2,303,631</b> |
| Chinese registries  | 22,582            | 5,297         | 4,615         | 4,866          | 4,952             | 237                 | 5,181               | 8,246                | 199               | 93                     | 256,458          |
| Beijing             | 11,467            | 1,377         | 2,349         | 3,051          | 1,468             | 54                  | 2,020               | 3,925                | 84                | 28                     | 79,606           |
| Changle             | 180               | 161           | 50            | 29             | 100               | 4                   | 67                  | 103                  | -                 | 1                      | 5,086            |
| Cixian              | 240               | 122           | 67            | 21             | 117               | 9                   | 101                 | 101                  | 2                 | 5                      | 8,110            |
| Dafeng              | 318               | 337           | 88            | 43             | 246               | 3                   | 129                 | 15                   | -                 | -                      | 7,821            |
| Dalian              | 3,548             | 834           | 566           | 512            | 343               | 17                  | 408                 | 992                  | 31                | 10                     | 26,710           |
| Donghai             | 458               | 193           | 85            | 42             | 196               | 18                  | 267                 | 219                  | 1                 | 4                      | 7,933            |
| Feicheng            | 485               | 55            | 102           | 36             | 164               | 7                   | 133                 | 97                   | -                 | 1                      | 9,462            |
| Ganyu               | 361               | 95            | 54            | 36             | 209               | 10                  | 132                 | 161                  | -                 | 6                      | 7,074            |
| Guanyun             | 453               | 139           | 112           | 61             | 233               | 12                  | 164                 | 190                  | 6                 | 3                      | 7,120            |
| Haimen              | 728               | 282           | 237           | 207            | 346               | 13                  | 289                 | 541                  | 11                | 4                      | 14,304           |
| Haining             | 457               | 148           | 112           | 108            | 160               | 5                   | 171                 | 245                  | 8                 | 2                      | 5,874            |
| Jianhu              | 235               | 258           | 43            | 28             | 226               | 6                   | 160                 | 145                  | 5                 | 1                      | 11,255           |
| Jiashan             | 422               | 72            | 61            | 78             | 125               | 6                   | 91                  | 154                  | 3                 | 1                      | 5,116            |
| Jintan              | 225               | 78            | 39            | 29             | 59                | 1                   | 67                  | 55                   | 1                 | -                      | 5,112            |
| Lianyungang         | 306               | 88            | 71            | 50             | 51                | 5                   | 82                  | 90                   | 4                 | 3                      | 3,025            |
| Linzhou             | 372               | 176           | 71            | 21             | 219               | 13                  | 150                 | 76                   | -                 | 2                      | 10,772           |
| Qidong              | 725               | 233           | 155           | 206            | 339               | 9                   | 286                 | 570                  | 6                 | 3                      | 15,896           |
| Sihui               | 149               | 60            | 60            | 19             | 67                | 8                   | 53                  | 74                   | 3                 | 2                      | 2,516            |
| Taixing             | 275               | 77            | 51            | 45             | 96                | 4                   | 95                  | 45                   | -                 | -                      | 8,179            |
| Yangzhong           | 239               | 186           | 15            | 5              | 20                | -                   | 19                  | 14                   | -                 | 1                      | 4,534            |
| Zhongshan           | 939               | 326           | 227           | 239            | 168               | 33                  | 297                 | 434                  | 34                | 16                     | 10,953           |
| Cyprus *            | 2,131             | 127           | 234           | 1,660          | 175               | 7                   | 255                 | 1,006                | 27                | 25                     | 9,035            |
| Hong Kong *         | 12,601            | 1,980         | -             | -              | -                 | -                   | -                   | -                    | -                 | -                      | 34,081           |
| Indian registries   | 277               | 279           | 59            | 62             | 66                | 7                   | 68                  | 80                   | 12                | 6                      | 1,637            |
| Guwahati            | -                 | 176           | -             | -              | -                 | -                   | -                   | -                    | -                 | -                      | 176              |
| Karunagappally      | 277               | 103           | 59            | 62             | 66                | 7                   | 68                  | 80                   | 12                | 6                      | 1,461            |
| Iran (Golestan)     | -                 | -             | -             | -              | -                 | -                   | -                   | -                    | -                 | -                      | 1,039            |
| Israel *            | 18,071            | 1,079         | 2,010         | 12,970         | 1,900             | 322                 | 3,013               | 11,035               | 273               | 279                    | 88,545           |
| Japanese registries | 81,128            | 13,413        | 13,802        | 72,103         | 6,487             | 576                 | 17,611              | 38,464               | 636               | 227                    | 809,334          |
| Aichi               | 12,625            | 2,220         | 2,147         | 11,115         | 1,169             | 125                 | 3,218               | 6,226                | 138               | 43                     | 120,832          |
| Akita               | -                 | -             | -             | -              | -                 | -                   | -                   | -                    | -                 | -                      | -                |
| Ehime               | 2,130             | 354           | 371           | 1,835          | 202               | 16                  | 531                 | 1,100                | 16                | 5                      | 19,749           |
| Fukui               | 1,663             | 253           | 276           | 1,746          | 162               | 16                  | 537                 | 1,021                | 14                | 9                      | 19,931           |
| Gunma               | 3,102             | 561           | 527           | 3,625          | 285               | 21                  | 1,026               | 1,553                | 20                | 3                      | 31,878           |
| Hiroshima           | 5,339             | 841           | 714           | 5,109          | 399               | 44                  | 1,183               | 2,760                | 28                | 14                     | 56,024           |
| Hyogo               | 4,784             | 1,027         | 991           | 4,549          | 535               | 30                  | 1,822               | 3,220                | 35                | 13                     | 53,691           |
| Ibaraki             | 4,501             | 842           | 761           | 3,984          | 304               | 25                  | 1,041               | 2,015                | 38                | 12                     | 41,938           |
| Kanagawa            | 14,951            | 2,310         | 2,609         | 13,295         | 795               | 50                  | 1,211               | 5,170                | 49                | 21                     | 132,225          |
| Miyagi              | 5,419             | 632           | 813           | 5,737          | 436               | 48                  | 1,100               | 2,414                | 51                | 10                     | 52,098           |
| Niigata             | 5,243             | 706           | 920           | 3,766          | 393               | 27                  | 1,160               | 2,570                | 53                | 16                     | 60,572           |
| Osaka               | 13,818            | 2,311         | 2,303         | 9,372          | 1,047             | 119                 | 2,635               | 6,291                | 128               | 61                     | 135,739          |
| Saga                | 1,202             | 273           | 231           | 1,336          | 124               | 13                  | 438                 | 878                  | 12                | 6                      | 15,109           |
| Tochigi             | 3,119             | 636           | 591           | 3,163          | 306               | 21                  | 821                 | 1,572                | 37                | 9                      | 30,824           |
| Yamagata            | 2,431             | 334           | 448           | 2,642          | 258               | 16                  | 667                 | 1,278                | 14                | 4                      | 30,971           |
| Yamanashi           | 801               | 113           | 100           | 829            | 72                | 5                   | 221                 | 396                  | 3                 | 1                      | 7,753            |
| Jordan *            | 3,906             | 216           | -             | 760            | 484               | 160                 | 665                 | 2,206                | 231               | 162                    | 13,887           |
| Korea * ‡           | 58,713            | 19,146        | 9,291         | 27,429         | 6,038             | 831                 | 14,205              | 23,111               | 1,137             | 665                    | 591,032          |
| Kuwait *            | 953               | 59            | 92            | 169            | 84                | 22                  | 136                 | 537                  | 98                | 45                     | 3,148            |
| Malaysia (Penang)   | 1,801             | 407           | 312           | 400            | 108               | 29                  | 191                 | 482                  | 58                | 32                     | 7,493            |
| Mongolia *          | 271               | -             | -             | -              | -                 | -                   | -                   | -                    | -                 | -                      | 271              |
| Qatar *             | 596               | 63            | 72            | 160            | 107               | 9                   | 160                 | 357                  | 23                | 25                     | 2,492            |
| Singapore *         | 7,350             | 946           | 1,125         | 2,686          | 421               | 66                  | 1,000               | 2,332                | 128               | 51                     | 36,029           |
| Taiwan *            | 38,486            | 9,209         | 5,540         | 17,226         | 2,691             | 421                 | 6,162               | 13,083               | 598               | 278                    | 284,992          |
| Thai registries     | 9,818             | 4,915         | 2,097         | 2,505          | 1,084             | 165                 | 2,030               | 3,321                | 237               | 75                     | 61,988           |
| Bangkok             | 5,803             | 2,173         | 1,112         | 1,647          | 666               | 91                  | 1,084               | 1,671                | 111               | 36                     | 32,169           |
| Khon Kaen           | 1,122             | 690           | 304           | 164            | 79                | 21                  | 295                 | 240                  | 43                | 3                      | 8,651            |
| Lampang             | 746               | 478           | 142           | 164            | 61                | 10                  | 146                 | 384                  | 23                | 8                      | 6,229            |
| Lamphun             | 418               | 403           | 96            | 102            | 66                | 8                   | 75                  | 199                  | 4                 | 4                      | 3,370            |
| Lopburi             | 844               | 616           | 228           | 170            | 98                | 12                  | 200                 | 322                  | 18                | 8                      | 5,617            |
| Songkhla            | 885               | 555           | 215           | 258            | 114               | 23                  | 230                 | 505                  | 38                | 16                     | 5,952            |
| Turkish registries  | 15,715            | 1,785         | 2,792         | 11,061         | 3,928             | 424                 | 3,704               | 7,910                | 577               | 383                    | 102,170          |
| Ankara              | 4,348             | 481           | 863           | 2,528          | 1,184             | 163                 | 720                 | 2,273                | 154               | 150                    | 25,312           |
| Antalya             | 1,321             | 174           | 273           | 1,206          | 382               | 55                  | 604                 | 835                  | 70                | 31                     | 8,761            |
| Bursa               | 1,869             | 235           | 337           | 1,074          | 378               | 32                  | 387                 | 712                  | 74                | 43                     | 12,210           |
| Edirne              | 310               | 28            | 53            | 160            | 68                | 4                   | 94                  | 169                  | 16                | 3                      | 2,345            |

Web-table 3.2: Number of patients included in survival analyses, by continent, country and registry: patients diagnosed during 2005-2009

|                                | Breast<br>(women) | Cervix        | Ovary          | Prostate       | Brain<br>(adults) | Brain<br>(children) | Myeloid<br>(adults) | Lymphoid<br>(adults) | ALL<br>(children) | Lymphoma<br>(children) | Total            |
|--------------------------------|-------------------|---------------|----------------|----------------|-------------------|---------------------|---------------------|----------------------|-------------------|------------------------|------------------|
| Erzurum                        | 342               | 48            | 58             | 248            | 126               | 15                  | 83                  | 289                  | 32                | 27                     | 3,530            |
| Eskisehir                      | 764               | 54            | 129            | 500            | 160               | 9                   | -                   | 13                   | -                 | -                      | 4,060            |
| Izmir                          | 5,220             | 618           | 812            | 3,910          | 1,116             | 106                 | 1,240               | 2,554                | 162               | 94                     | 33,885           |
| Samsun                         | 919               | 83            | 160            | 814            | 305               | 29                  | 293                 | 651                  | 50                | 21                     | 7,122            |
| Trabzon                        | 622               | 64            | 107            | 621            | 209               | 11                  | 283                 | 414                  | 19                | 14                     | 4,945            |
| <b>EUROPE</b>                  | <b>993,300</b>    | <b>97,555</b> | <b>144,461</b> | <b>893,798</b> | <b>110,809</b>    | <b>8,684</b>        | <b>168,014</b>      | <b>437,411</b>       | <b>10,637</b>     | <b>5,403</b>           | <b>5,562,829</b> |
| Austria *                      | 24,736            | 2,040         | 3,812          | 25,731         | 2,792             | -                   | 2,389               | 10,720               | -                 | -                      | 138,988          |
| Belarus (Childhood) †          | -                 | -             | -              | -              | -                 | 173                 | -                   | -                    | 209               | 97                     | 479              |
| Belgium *                      | 48,911            | 3,123         | 4,833          | 45,606         | 4,068             | 314                 | 7,730               | 18,113               | 313               | 243                    | 237,929          |
| Bulgaria *                     | 18,162            | 5,643         | 4,311          | 7,589          | -                 | -                   | 2,360               | 5,200                | 217               | 89                     | 93,790           |
| Croatia *                      | 12,029            | 1,821         | 2,356          | 7,937          | 2,501             | 130                 | 1,653               | 5,068                | 146               | 87                     | 75,601           |
| Czech Republic *               | 30,184            | 5,099         | 6,172          | 26,740         | 3,695             | 174                 | 3,530               | 12,207               | 190               | 83                     | 193,158          |
| Denmark *                      | 22,753            | 1,901         | 3,035          | 20,728         | 3,068             | 160                 | 2,992               | 9,451                | 173               | 78                     | 125,260          |
| Estonia *                      | 3,104             | 898           | 860            | 4,070          | 527               | 36                  | 662                 | 1,624                | 34                | 14                     | 23,643           |
| Finland *                      | 20,575            | 728           | 2,655          | 22,764         | 2,062             | 154                 | 1,802               | 8,527                | 206               | 80                     | 98,689           |
| French registries              | 40,349            | 2,518         | 4,227          | 47,522         | 3,796             | 1,722               | 9,803               | 20,745               | 1,836             | 964                    | 232,734          |
| Bas-Rhin                       | 4,132             | 252           | 440            | 5,066          | 398               | -                   | 858                 | 1,874                | -                 | -                      | 22,667           |
| Basse Normandie                | -                 | -             | -              | -              | -                 | -                   | 1,568               | 2,746                | -                 | -                      | 4,314            |
| Burgundy Digestive             | -                 | -             | -              | -              | -                 | -                   | -                   | -                    | -                 | -                      | 6,361            |
| Calvados                       | 2,763             | 155           | 318            | 3,121          | 247               | -                   | -                   | -                    | -                 | -                      | 8,593            |
| Calvados Digestive             | -                 | -             | -              | -              | -                 | -                   | -                   | -                    | -                 | -                      | 3,720            |
| Côte-d'Or Gynaecologic         | 1,919             | 117           | 123            | -              | -                 | -                   | -                   | -                    | -                 | -                      | 2,159            |
| Côte-d'Or Haematopoietic       | -                 | -             | -              | -              | -                 | -                   | 545                 | 1,164                | -                 | -                      | 1,709            |
| Doubs                          | 1,799             | 151           | 230            | 3,030          | 174               | -                   | 478                 | 1,054                | -                 | -                      | 11,360           |
| Finistère                      | -                 | -             | -              | -              | -                 | -                   | -                   | -                    | -                 | -                      | 5,942            |
| Gironde CNS                    | -                 | -             | -              | -              | 567               | -                   | -                   | -                    | -                 | -                      | 567              |
| Gironde General                | 3,372             | 209           | 318            | 3,389          | -                 | -                   | -                   | -                    | -                 | -                      | 14,820           |
| Gironde Haematopoietic         | -                 | -             | -              | -              | -                 | -                   | 1,352               | 2,580                | -                 | -                      | 3,932            |
| Haut-Rhin                      | 2,779             | 166           | 291            | 3,684          | 196               | -                   | 555                 | 1,297                | -                 | -                      | 15,436           |
| Haute-Vienne                   | 318               | 22            | 29             | 510            | 33                | -                   | 120                 | 172                  | -                 | -                      | 1,886            |
| Hérault                        | 4,130             | 318           | 383            | 4,964          | 348               | -                   | 861                 | 1,742                | -                 | -                      | 22,098           |
| Isère                          | 4,469             | 255           | 479            | 5,583          | 452               | -                   | 851                 | 2,042                | -                 | -                      | 23,980           |
| Lille Metro                    | 1,261             | 105           | 128            | 1,220          | 105               | -                   | 270                 | 436                  | -                 | -                      | 6,142            |
| Loire-Atlantique               | 7,553             | 338           | 745            | 9,570          | 747               | -                   | 1,349               | 3,937                | -                 | -                      | 41,468           |
| Manche                         | 2,031             | 130           | 306            | 2,671          | 195               | -                   | -                   | -                    | -                 | -                      | 10,313           |
| Somme                          | 2,279             | 177           | 268            | 2,550          | 157               | -                   | 542                 | 932                  | -                 | -                      | 11,633           |
| Tarn                           | 1,544             | 123           | 169            | 2,164          | 177               | -                   | 454                 | 769                  | -                 | -                      | 9,112            |
| France Childhood Haem †        | -                 | -             | -              | -              | -                 | -                   | -                   | -                    | 1,836             | 964                    | 2,800            |
| France Childhood Solid †       | -                 | -             | -              | -              | -                 | 1,722               | -                   | -                    | -                 | -                      | 1,722            |
| German registries              | 116,227           | 8,967         | 14,195         | 113,804        | 10,530            | 300                 | 17,812              | 47,768               | 452               | 178                    | 625,088          |
| Brandenburg                    | 9,161             | 865           | 1,217          | 10,727         | 1,006             | -                   | 1,363               | 4,016                | -                 | -                      | 54,110           |
| Bremen                         | 2,672             | 199           | 407            | 2,347          | 278               | 13                  | 533                 | 1,288                | 21                | 7                      | 15,750           |
| Hamburg                        | 7,336             | 547           | 973            | 6,027          | 576               | -                   | 1,281               | 2,975                | -                 | -                      | 36,915           |
| Lower Saxony                   | 33,310            | 2,191         | 3,689          | 33,046         | 2,429             | 120                 | 5,039               | 12,764               | 223               | 92                     | 171,438          |
| Mecklenburg-W. Pomerania       | 5,821             | 544           | 741            | 6,880          | 641               | -                   | 1,107               | 3,111                | -                 | -                      | 36,407           |
| Rhineland Palatinate           | 16,110            | 1,089         | 1,835          | 14,881         | 1,431             | 113                 | 1,893               | 5,195                | 120               | 62                     | 80,930           |
| Saarland                       | 4,237             | 331           | 572            | 3,635          | 366               | 18                  | 364                 | 1,608                | 18                | 3                      | 23,014           |
| Saxony                         | 15,961            | 1,479         | 2,173          | 16,926         | 1,910             | -                   | 3,346               | 8,091                | -                 | -                      | 95,908           |
| Schleswig-Holstein             | 13,398            | 855           | 1,475          | 11,682         | 1,005             | 36                  | 1,438               | 4,976                | 70                | 14                     | 63,781           |
| Thuringia                      | 8,221             | 867           | 1,113          | 7,653          | 888               | -                   | 1,448               | 3,744                | -                 | -                      | 46,835           |
| Gibraltar *                    | 102               | 4             | 8              | 39             | 8                 | -                   | 2                   | 2                    | -                 | -                      | 330              |
| Greece (National Paediatric) † | -                 | -             | -              | -              | -                 | -                   | -                   | -                    | 346               | 136                    | 482              |
| Iceland *                      | 936               | 69            | 90             | 1,121          | 124               | 15                  | 166                 | 421                  | 9                 | 2                      | 5,127            |
| Ireland *                      | 12,611            | 1,390         | 1,780          | 13,640         | 1,661             | 138                 | 2,256               | 6,118                | 164               | 56                     | 71,192           |
| Italian registries             | 119,220           | 6,207         | 14,725         | 95,654         | 13,724            | 747                 | 24,504              | 58,403               | 920               | 613                    | 676,274          |
| Alto Adige                     | 1,569             | 95            | 221            | 1,731          | 189               | 4                   | 368                 | 826                  | 18                | 10                     | 10,103           |
| Barletta-Andria-Trani          | 954               | 55            | 126            | 664            | 134               | 8                   | 371                 | 526                  | 8                 | 1                      | 5,427            |
| Basilicata                     | 1,229             | 97            | 219            | 1,333          | 255               | 8                   | 648                 | 834                  | 3                 | 7                      | 9,091            |
| Bergamo                        | 2,489             | 137           | 283            | 2,132          | 263               | 17                  | 354                 | 1,223                | 15                | 15                     | 15,204           |
| Biella-Vercelli                | 1,405             | 91            | 194            | 1,202          | 148               | -                   | 418                 | 746                  | -                 | -                      | 8,363            |
| Brescia                        | 3,839             | 212           | 475            | 3,204          | 316               | 7                   | 276                 | 1,383                | 16                | 17                     | 20,192           |
| Brindisi                       | 842               | 41            | 103            | 556            | 149               | 9                   | 226                 | 434                  | 6                 | 7                      | 4,454            |
| Caserta                        | 930               | 59            | 133            | 606            | 131               | 20                  | 341                 | 493                  | 5                 | 13                     | 5,672            |
| Catania-Messina-Enna           | 6,032             | 361           | 831            | 4,064          | 639               | 31                  | 1,554               | 3,246                | 74                | 40                     | 32,645           |
| Catanzaro                      | 845               | 72            | 116            | 805            | 137               | 5                   | 348                 | 606                  | 14                | 4                      | 5,622            |
| Como                           | 2,608             | 144           | 257            | 2,019          | 241               | 13                  | 386                 | 1,049                | 19                | 11                     | 13,604           |
| Cremona                        | 1,604             | 72            | 191            | 1,375          | 157               | 8                   | 289                 | 740                  | 4                 | 2                      | 9,393            |
| Ferrara                        | 1,962             | 73            | 248            | 1,598          | 239               | 7                   | 434                 | 869                  | 4                 | 9                      | 11,285           |
| Friuli-Venezia-Giulia          | 6,323             | 276           | 632            | 5,662          | 603               | 20                  | 420                 | 2,356                | 30                | 26                     | 32,890           |
| Genoa                          | 4,521             | 308           | 562            | 3,393          | 492               | 21                  | 995                 | 2,233                | 13                | 10                     | 25,368           |
| Latina                         | 1,740             | 99            | 205            | 1,192          | 242               | 12                  | 406                 | 858                  | 14                | 13                     | 9,801            |
| Lecce                          | 2,000             | 144           | 322            | 1,508          | 365               | 22                  | 583                 | 1,044                | 20                | 10                     | 12,256           |
| Mantova                        | 1,886             | 63            | 230            | 1,329          | 173               | 5                   | 168                 | 870                  | 6                 | 5                      | 10,007           |
| Milano                         | 11,507            | 553           | 1,353          | 8,744          | 1,099             | 56                  | 2,204               | 5,289                | 72                | 42                     | 62,510           |
| Modena                         | 3,012             | 129           | 340            | 2,811          | 292               | 12                  | 603                 | 1,510                | 16                | 6                      | 17,330           |
| Monza-Brianza                  | 2,248             | 99            | 235            | 1,427          | 222               | 9                   | 395                 | 1,009                | 11                | 5                      | 11,750           |
| Naples                         | 2,094             | 121           | 256            | 1,344          | 300               | 37                  | 523                 | 1,150                | 31                | 18                     | 12,682           |
| Nuoro                          | 703               | 23            | 87             | 458            | 82                | 2                   | 201                 | 466                  | 7                 | 4                      | 4,055            |
| Palermo                        | 3,634             | 242           | 483            | 2,493          | 512               | 40                  | 802                 | 1,719                | 41                | 22                     | 20,093           |
| Parma                          | 1,960             | 93            | 252            | 1,510          | 256               | 13                  | 475                 | 1,103                | 10                | 3                      | 11,919           |
| Pavia                          | 2,664             | 155           | 259            | 1,763          | 253               | 3                   | 199                 | 1,162                | 11                | 8                      | 13,974           |
| Piacenza                       | 1,069             | 55            | 102            | 990            | 124               | 3                   | 273                 | 633                  | 6                 | 3                      | 6,618            |
| Ragusa                         | 1,299             | 74            | 208            | 1,017          | 210               | 21                  | 375                 | 777                  | 14                | 12                     | 7,843            |
| Reggio Emilia                  | 2,171             | 80            | 248            | 1,677          | 270               | 15                  | 440                 | 1,101                | 18                | 9                      | 11,939           |
| Romagna                        | 5,087             | 288           | 616            | 5,093          | 799               | 33                  | 1,676               | 2,857                | 22                | 17                     | 33,014           |
| Salerno                        | 2,797             | 180           | 458            | 2,366          | 455               | 24                  | 847                 | 1,682                | 33                | 30                     | 17,573           |
| Sassari                        | 1,723             | 85            | 161            | 1,077          | 196               | 10                  | 284                 | 798                  | 18                | 9                      | 8,529            |

Web-table 3.2: Number of patients included in survival analyses, by continent, country and registry: patients diagnosed during 2005-2009

|                              | Breast<br>(women) | Cervix         | Ovary          | Prostate         | Brain<br>(adults) | Brain<br>(children) | Myeloid<br>(adults) | Lymphoid<br>(adults) | ALL<br>(children) | Lymphoma<br>(children) | Total             |
|------------------------------|-------------------|----------------|----------------|------------------|-------------------|---------------------|---------------------|----------------------|-------------------|------------------------|-------------------|
| Siracusa                     | 1,144             | 82             | 170            | 808              | 126               | 4                   | 218                 | 556                  | 13                | 4                      | 6,409             |
| Sondrio                      | 682               | 43             | 76             | 720              | 73                | 5                   | 80                  | 369                  | 7                 | 4                      | 4,388             |
| Taranto                      | 1,539             | 86             | 227            | 1,056            | 219               | 19                  | 484                 | 752                  | 14                | 18                     | 8,512             |
| Trapani                      | 1,165             | 74             | 172            | 812              | 188               | 11                  | 292                 | 633                  | 13                | 8                      | 6,761             |
| Trento                       | 1,903             | 93             | 250            | 1,351            | 160               | 10                  | 221                 | 874                  | 13                | 7                      | 9,968             |
| Turin                        | 4,142             | 190            | 544            | 3,666            | 382               | -                   | 772                 | 2,176                | -                 | -                      | 23,301            |
| Tuscany                      | 5,270             | 274            | 671            | 4,075            | 615               | 34                  | 1,123               | 2,595                | 34                | 28                     | 30,105            |
| Umbria                       | 3,438             | 191            | 445            | 3,433            | 442               | 13                  | 1,076               | 2,026                | 25                | 17                     | 22,854            |
| Varese                       | 3,642             | 181            | 446            | 3,582            | 369               | 20                  | 364                 | 1,773                | 30                | 19                     | 20,414            |
| Veneto                       | 10,515            | 383            | 1,204          | 8,128            | 1,087             | 24                  | 1,708               | 4,562                | 59                | 47                     | 55,872            |
| Viterbo                      | 1,034             | 34             | 114            | 880              | 120               | 8                   | 284                 | 495                  | 7                 | 4                      | 6,185             |
| Piedmont Childhood           | -                 | -              | -              | -                | -                 | 104                 | -                   | -                    | 126               | 69                     | 299               |
| Latvia *                     | 4,244             | 1,016          | 1,299          | 3,762            | 541               | 18                  | 488                 | 833                  | 46                | -                      | 23,820            |
| Lithuania *                  | 6,960             | 2,452          | 2,070          | 15,559           | 1,160             | 44                  | 2,151               | 3,771                | 86                | 39                     | 57,329            |
| Malta *                      | 1,280             | 53             | 198            | 731              | 102               | 6                   | 128                 | 463                  | 16                | 9                      | 5,417             |
| Netherlands *                | 65,443            | 3,514          | 6,336          | 48,834           | 5,911             | 470                 | 10,868              | 26,538               | 536               | 266                    | 331,059           |
| Norway *                     | 14,028            | 1,470          | 2,335          | 19,892           | 1,904             | 174                 | 2,729               | 8,039                | 169               | 82                     | 91,773            |
| Poland *                     | 74,192            | 16,723         | 18,071         | 43,840           | 13,391            | 697                 | 7,143               | 32,071               | 916               | 451                    | 455,727           |
| Greater Poland               | 6,956             | 1,348          | 1,595          | 4,458            | 1,131             | 78                  | 656                 | 3,038                | 92                | 45                     | 41,125            |
| Holy Cross                   | 2,136             | 545            | 533            | 1,581            | 545               | 20                  | 354                 | 1,275                | 30                | 12                     | 15,822            |
| Kujavia-Pomerania            | 4,509             | 926            | 1,160          | 2,589            | 857               | 41                  | 508                 | 2,018                | 73                | 39                     | 27,429            |
| Lesser Poland                | 5,941             | 1,318          | 1,645          | 3,803            | 1,077             | 67                  | 479                 | 2,685                | 77                | 49                     | 37,561            |
| Łódź                         | 5,800             | 1,246          | 1,401          | 2,250            | 1,091             | 47                  | 715                 | 2,223                | 36                | 17                     | 32,287            |
| Lower Silesia                | 6,295             | 1,376          | 1,403          | 3,067            | 1,235             | 43                  | 547                 | 2,480                | -                 | 46                     | 38,522            |
| Lublin                       | 3,868             | 924            | 1,126          | 2,576            | 895               | 41                  | 554                 | 2,274                | 63                | 24                     | 25,894            |
| Lubush                       | 1,974             | 542            | 466            | 908              | 342               | 29                  | 177                 | 723                  | 20                | 10                     | 11,727            |
| Mazovia                      | 10,529            | 2,142          | 2,043          | 6,233            | 1,610             | 78                  | 503                 | 3,639                | 134               | 64                     | 56,745            |
| Opole                        | 1,901             | 446            | 475            | 1,004            | 260               | 10                  | 145                 | 738                  | 27                | 7                      | 11,716            |
| Podlahaia                    | 1,942             | 584            | 593            | 1,376            | 408               | 14                  | 254                 | 1,032                | 39                | 11                     | 13,220            |
| Pomerania                    | 4,375             | 1,099          | 959            | 2,976            | 627               | 31                  | 483                 | 1,945                | 51                | 19                     | 27,530            |
| Silesia                      | 9,188             | 2,070          | 2,466          | 5,872            | 1,602             | 71                  | 902                 | 3,790                | 128               | 36                     | 57,786            |
| Subcarpathia                 | 2,949             | 708            | 927            | 2,306            | 784               | 50                  | 435                 | 1,992                | 62                | 24                     | 22,775            |
| Varmia-Mazuria               | 2,535             | 658            | 626            | 1,293            | 452               | 28                  | 183                 | 1,066                | 44                | 25                     | 16,154            |
| West Pomerania               | 3,294             | 791            | 653            | 1,548            | 475               | 49                  | 248                 | 1,153                | 40                | 23                     | 19,434            |
| Portugal *                   | 28,201            | 3,690          | 2,625          | 27,411           | 3,105             | 206                 | 3,747               | 13,048               | 240               | 192                    | 160,222           |
| Azores                       | 523               | 77             | 64             | 597              | 70                | 7                   | 111                 | 324                  | 3                 | 8                      | 3,339             |
| Portugal Central             | 5,222             | 633            | 455            | 5,440            | 449               | 20                  | 650                 | 2,207                | 53                | 52                     | 28,367            |
| Portugal North               | 8,177             | 1,096          | 671            | 8,035            | 940               | 56                  | 939                 | 3,587                | 78                | 58                     | 49,583            |
| Portugal South               | 14,279            | 1,884          | 1,435          | 13,339           | 1,646             | 123                 | 2,047               | 6,930                | 106               | 74                     | 78,933            |
| Romania (Cluj)               | 1,234             | 537            | 256            | 761              | 135               | 9                   | 246                 | 528                  | 8                 | 3                      | 7,535             |
| Russian registries ‡         | 15,198            | 4,044          | 4,063          | 6,569            | 1,655             | 97                  | 1,093               | 3,105                | 111               | 66                     | 88,870            |
| Arkhangelsk                  | 1,905             | 526            | 560            | 878              | 300               | 13                  | 200                 | 758                  | 23                | 12                     | 14,935            |
| Karelia                      | 1,322             | 522            | 351            | 547              | 135               | 7                   | 221                 | 283                  | 1                 | 8                      | 8,509             |
| Omsk                         | 3,292             | 995            | 941            | 1,293            | 251               | 23                  | -                   | -                    | -                 | -                      | 16,045            |
| Samara                       | 7,027             | 1,342          | 1,771          | 3,117            | 765               | 52                  | 672                 | 2,064                | 87                | 46                     | 40,324            |
| Tomsk                        | 1,652             | 659            | 440            | 734              | 204               | 2                   | -                   | -                    | -                 | -                      | 9,057             |
| Slovakia *                   | 11,832            | 2,962          | 2,574          | 7,537            | 1,910             | 137                 | 2,319               | 5,866                | 148               | 74                     | 77,551            |
| Slovenia *                   | 5,684             | 757            | 1,029          | 5,598            | 697               | 46                  | 1,189               | 2,713                | 43                | 25                     | 37,706            |
| Spanish registries           | 22,842            | 2,132          | 3,160          | 26,566           | 3,546             | 596                 | 5,999               | 13,056               | 716               | 412                    | 154,205           |
| Basque Country               | 6,286             | 462            | 921            | 8,014            | 1,035             | 47                  | 1,776               | 3,699                | 64                | 23                     | 45,261            |
| Canaries                     | 3,987             | 480            | 465            | 4,161            | 596               | 38                  | 732                 | 2,372                | 44                | 32                     | 23,859            |
| Girona                       | 1,887             | 155            | 237            | 2,196            | 294               | 21                  | 683                 | 1,198                | 22                | 6                      | 12,905            |
| Granada                      | 2,028             | 175            | 332            | 2,088            | 342               | 21                  | 466                 | 1,024                | 23                | 21                     | 12,961            |
| Mallorca                     | 1,921             | 226            | 291            | 2,246            | 219               | 22                  | 568                 | 1,045                | 24                | 14                     | 12,851            |
| Murcia                       | 3,087             | 343            | 454            | 3,594            | 432               | 24                  | 915                 | 1,860                | 54                | 15                     | 20,938            |
| Navarra                      | 1,668             | 107            | 229            | 1,912            | 353               | 16                  | 361                 | 870                  | 18                | 13                     | 11,304            |
| Tarragona                    | 1,978             | 184            | 231            | 2,355            | 275               | 19                  | 498                 | 988                  | 18                | 21                     | 13,022            |
| Spain Childhood              | -                 | -              | -              | -                | -                 | 279                 | -                   | -                    | 325               | 183                    | 787               |
| Valencia Childhood           | -                 | -              | -              | -                | -                 | 109                 | -                   | -                    | 124               | 84                     | 317               |
| Sweden *                     | 33,169            | 2,231          | 4,007          | 47,691           | 3,085             | 243                 | 5,409               | 14,463               | 270               | 102                    | 181,615           |
| Swiss registries             | 13,737            | 611            | 1,780          | 15,004           | 1,456             | 171                 | 2,642               | 6,903                | 232               | 116                    | 76,028            |
| Basel                        | 1,012             | 47             | 100            | 1,245            | 91                | -                   | 88                  | 458                  | -                 | -                      | 5,379             |
| Fribourg                     | 771               | 22             | 82             | 772              | 62                | -                   | 129                 | 336                  | -                 | -                      | 3,870             |
| Geneva                       | 1,797             | 55             | 221            | 1,528            | 162               | -                   | 329                 | 810                  | -                 | -                      | 8,892             |
| Graubünden-Glarus            | 752               | 47             | 132            | 1,204            | 87                | -                   | 197                 | 429                  | -                 | -                      | 4,886             |
| Neuchâtel                    | 692               | 21             | 89             | 633              | 60                | -                   | 95                  | 291                  | -                 | -                      | 3,597             |
| St Gallen-Appenzell          | 1,467             | 96             | 247            | 2,111            | 223               | -                   | 322                 | 925                  | -                 | -                      | 9,641             |
| Ticino                       | 1,418             | 71             | 169            | 1,212            | 129               | -                   | 281                 | 705                  | -                 | -                      | 7,550             |
| Valais                       | 1,079             | 46             | 157            | 1,138            | 133               | -                   | 221                 | 510                  | -                 | -                      | 6,060             |
| Zürich                       | 4,749             | 206            | 583            | 5,161            | 509               | -                   | 980                 | 2,439                | -                 | -                      | 25,634            |
| Switzerland Childhood †      | -                 | -              | -              | -                | -                 | 171                 | -                   | -                    | 232               | 116                    | 519               |
| United Kingdom *             | 225,357           | 14,955         | 31,599         | 191,098          | 23,655            | 1,707               | 44,202              | 101,647              | 1,885             | 846                    | 1,215,208         |
| England                      | 187,785           | 12,064         | 25,998         | 160,360          | 19,538            | 1,413               | 37,617              | 83,996               | 1,575             | 733                    | 1,001,360         |
| Northern Ireland             | 5,494             | 520            | 872            | 4,807            | 679               | 71                  | 1,349               | 2,670                | 47                | 27                     | 31,445            |
| Scotland                     | 20,106            | 1,519          | 2,958          | 14,166           | 2,127             | 128                 | 4,093               | 9,404                | 154               | 55                     | 115,730           |
| Wales                        | 11,972            | 852            | 1,771          | 11,765           | 1,311             | 95                  | 1,143               | 5,775                | 109               | 31                     | 66,673            |
| <b>OCEANIA</b>               | <b>79,273</b>     | <b>4,558</b>   | <b>9,000</b>   | <b>111,894</b>   | <b>8,787</b>      | <b>578</b>          | <b>20,310</b>       | <b>44,352</b>        | <b>1,015</b>      | <b>415</b>             | <b>528,292</b>    |
| Australia *                  | 66,351            | 3,786          | 7,455          | 97,791           | 7,610             | 513                 | 17,261              | 37,741               | 839               | 348                    | 449,088           |
| Australian Capital Territory | 1,068             | 43             | 108            | 1,243            | 104               | 12                  | 188                 | 527                  | 16                | 6                      | 5,750             |
| New South Wales              | 21,241            | 1,207          | 2,418          | 32,941           | 2,243             | 111                 | 5,062               | 11,959               | 276               | 104                    | 146,548           |
| Northern Territory           | 332               | 56             | 31             | 373              | 35                | 4                   | 73                  | 177                  | 6                 | 5                      | 2,237             |
| Queensland                   | 14,093            | 910            | 1,519          | 19,327           | 1,861             | 197                 | 3,660               | 7,617                | 183               | 62                     | 95,595            |
| South Australia              | 5,375             | 253            | 608            | 8,249            | 593               | 30                  | 1,369               | 3,485                | 57                | 23                     | 36,355            |
| Tasmania                     | 1,638             | 88             | 193            | 2,980            | 200               | 18                  | 295                 | 1,025                | 19                | 4                      | 12,368            |
| Victoria                     | 16,396            | 824            | 1,954          | 23,636           | 1,908             | 105                 | 5,165               | 9,607                | 210               | 101                    | 109,463           |
| Western Australia            | 6,208             | 405            | 624            | 9,042            | 666               | 36                  | 1,449               | 3,344                | 72                | 43                     | 40,772            |
| New Zealand *                | 12,922            | 772            | 1,545          | 14,103           | 1,177             | 65                  | 3,049               | 6,611                | 176               | 67                     | 79,204            |
| <b>Total</b>                 | <b>2,336,553</b>  | <b>239,343</b> | <b>314,797</b> | <b>2,224,323</b> | <b>244,990</b>    | <b>24,488</b>       | <b>435,317</b>      | <b>1,102,354</b>     | <b>30,945</b>     | <b>14,601</b>          | <b>13,879,128</b> |

Web-table 3.3: Number of patients included in survival analyses, by continent, country and registry: patients diagnosed during 2010-2014

Back

|                                    | Oesophagus    | Stomach       | Colon          | Rectum         | Liver         | Pancreas       | Lung           | Melanoma<br>of skin |
|------------------------------------|---------------|---------------|----------------|----------------|---------------|----------------|----------------|---------------------|
| <b>AFRICA</b>                      | <b>976</b>    | <b>556</b>    | <b>849</b>     | <b>621</b>     | <b>398</b>    | <b>162</b>     | <b>826</b>     | <b>158</b>          |
| Algerian registries                | 55            | 385           | 480            | 308            | 62            | 98             | 537            | 102                 |
| Annaba                             | 5             | 51            | 152            | 53             | 15            | 23             | 164            | 12                  |
| Sétif                              | 15            | 39            | 73             | 50             | 22            | 19             | 119            | 90                  |
| Tlemcen                            | 35            | 295           | 255            | 205            | 25            | 56             | 254            | -                   |
| Mali (Bamako)                      | -             | -             | -              | -              | -             | -              | -              | -                   |
| Mauritius *                        | 59            | 135           | 184            | 113            | 27            | 45             | 201            | 4                   |
| Morocco (Casablanca)               | -             | -             | -              | -              | -             | -              | -              | -                   |
| Nigeria (Ibadan)                   | -             | -             | 139            | 160            | 203           | -              | -              | 34                  |
| South Africa (Eastern Cape)        | 862           | 36            | 46             | 40             | 106           | 19             | 88             | 18                  |
| <b>AMERICA (Central and South)</b> | <b>3,684</b>  | <b>17,837</b> | <b>27,564</b>  | <b>9,337</b>   | <b>3,260</b>  | <b>5,317</b>   | <b>17,427</b>  | <b>2,718</b>        |
| Argentinian registries             | 345           | 982           | 2,313          | 800            | 424           | 606            | 1,886          | 391                 |
| Chubut                             | -             | 97            | 288            | 37             | 50            | 68             | 192            | 7                   |
| Córdoba                            | 103           | 246           | 751            | 265            | 131           | 225            | 676            | 162                 |
| Mendoza                            | 242           | 599           | 1,220          | 498            | 243           | 313            | 959            | 222                 |
| Tierra del Fuego                   | -             | 40            | 54             | -              | -             | -              | 59             | -                   |
| Argentina (Childhood) †            | -             | -             | -              | -              | -             | -              | -              | -                   |
| Brazilian registries               | 1,505         | 3,209         | 5,624          | 2,515          | 233           | 1,345          | 1,232          | 365                 |
| Aracaju                            | 46            | 136           | 209            | 80             | 43            | 44             | 174            | 69                  |
| Cuiabá                             | -             | -             | -              | -              | -             | -              | -              | -                   |
| Curitiba                           | 236           | 458           | 591            | 406            | 131           | 158            | 548            | 249                 |
| Goiânia                            | 103           | -             | -              | -              | 43            | 95             | 409            | -                   |
| Jaú                                | 49            | 76            | 135            | 91             | 16            | 33             | 101            | 47                  |
| São Paulo                          | 1,071         | 2,539         | 4,689          | 1,938          | -             | 1,015          | -              | -                   |
| Chilean registries                 | 207           | 1,017         | 498            | 216            | 101           | 198            | 439            | 124                 |
| Antofagasta                        | 11            | 71            | 64             | 27             | 11            | 15             | 125            | 17                  |
| Biobio                             | 84            | 403           | 168            | 88             | 31            | 74             | 139            | 41                  |
| Concepción                         | 36            | 224           | 148            | 38             | 34            | 35             | 77             | 34                  |
| Los Rios                           | 76            | 319           | 118            | 63             | 25            | 74             | 98             | 32                  |
| Colombian registries               | 192           | 2,641         | 1,555          | 750            | 435           | 530            | 1,359          | 435                 |
| Bucaramanga                        | -             | 566           | -              | -              | -             | -              | -              | 79                  |
| Cali                               | 148           | 1,696         | 1,335          | 621            | 403           | 461            | 1,199          | 271                 |
| Manizales                          | 28            | 187           | 155            | 85             | 14            | 34             | 105            | 41                  |
| Pasto                              | 16            | 192           | 65             | 44             | 18            | 35             | 55             | 44                  |
| Costa Rica *                       | 202           | 3,194         | 2,431          | 923            | 525           | 430            | 1,070          | 651                 |
| Cuba *                             | -             | 1,403         | 3,615          | -              | -             | -              | 5,382          | -                   |
| Ecuadorian registries              | 188           | 2,855         | 1,504          | 740            | 738           | 459            | 1,121          | 470                 |
| Cuenca Ecuador                     | 11            | 172           | 75             | 51             | 48            | 37             | 58             | 52                  |
| Guayaquil                          | 71            | 960           | 627            | 267            | 288           | 172            | 474            | 103                 |
| Loja                               | 10            | 183           | 55             | 36             | 31            | 23             | 29             | 29                  |
| Manabí                             | 41            | 593           | 233            | 115            | 118           | 53             | 175            | 46                  |
| Quito                              | 55            | 947           | 514            | 271            | 253           | 174            | 385            | 240                 |
| Guadeloupe *                       | 81            | 373           | 496            | 150            | 47            | 115            | 202            | 35                  |
| Martinique *                       | 50            | 220           | 395            | 118            | 42            | 139            | 179            | 37                  |
| Mexico (Childhood) †               | -             | -             | -              | -              | -             | -              | -              | -                   |
| Peru (Lima)                        | -             | -             | 2,803          | 992            | -             | -              | -              | -                   |
| Puerto Rico *                      | 275           | 674           | 2,636          | 762            | 524           | 535            | 1,277          | 210                 |
| Uruguay *                          | 639           | 1,269         | 3,694          | 1,371          | 191           | 960            | 3,280          | -                   |
| <b>AMERICA (North)</b>             | <b>60,112</b> | <b>86,986</b> | <b>401,307</b> | <b>140,118</b> | <b>93,648</b> | <b>155,441</b> | <b>760,418</b> | <b>222,801</b>      |
| Canadian registries                | 7,359         | 12,139        | 59,714         | 23,034         | 9,541         | 16,620         | 87,521         | 26,335              |
| Alberta                            | 895           | 1,242         | 6,805          | 2,876          | 1,171         | 2,093          | 9,671          | 2,822               |
| British Columbia                   | 1,372         | 1,841         | 10,920         | 4,507          | 1,894         | 3,070          | 14,738         | 4,926               |
| Manitoba                           | 294           | 565           | 2,895          | 1,294          | 387           | 882            | 4,220          | 935                 |
| New Brunswick                      | 207           | 397           | 2,047          | 804            | 220           | 607            | 3,481          | 777                 |
| Newfoundland & Labrador            | 141           | 412           | 2,056          | 703            | 184           | 302            | 2,197          | 464                 |
| Nova Scotia                        | 383           | 406           | 2,907          | 1,185          | 291           | 694            | 4,535          | 1,342               |
| Ontario                            | 3,765         | 6,747         | 28,883         | 10,433         | 5,104         | 8,194          | 44,454         | 14,136              |
| Prince Edward Island               | 53            | 67            | 453            | 140            | 41            | 101            | 622            | 213                 |
| Saskatchewan                       | 249           | 462           | 2,748          | 1,092          | 249           | 677            | 3,603          | 720                 |
| US registries                      | 52,753        | 74,847        | 341,593        | 117,084        | 84,107        | 138,821        | 672,897        | 196,466             |
| Alabama                            | 1,306         | 1,780         | 9,306          | 2,791          | 1,803         | 3,468          | 18,907         | 5,144               |
| Alaska                             | 137           | 176           | 782            | 258            | 210           | 264            | 1,290          | 332                 |
| Arkansas                           | 283           | 370           | 2,127          | 680            | 387           | 680            | 4,858          | 1,020               |
| California                         | 2,798         | 5,493         | 21,051         | 7,659          | 6,965         | 8,418          | 32,052         | 13,916              |
| Greater Bay Area                   | 1,360         | 2,744         | 10,067         | 3,623          | 4,073         | 4,406          | 14,909         | 8,023               |
| Greater California                 | 4,117         | 6,951         | 28,579         | 10,774         | 9,573         | 11,931         | 47,207         | 23,219              |
| Los Angeles                        | 1,470         | 4,513         | 13,240         | 4,915          | 4,611         | 5,348          | 17,155         | 5,844               |
| Colorado                           | 819           | 1,109         | 5,072          | 1,884          | 1,403         | 2,107          | 8,211          | 4,290               |
| Connecticut                        | 1,018         | 1,723         | 6,158          | 2,133          | 1,649         | 2,845          | 12,310         | 4,006               |
| Delaware                           | 262           | 346           | 1,553          | 483            | 465           | 735            | 3,670          | 1,486               |
| Florida                            | 4,538         | 5,894         | 28,544         | 8,874          | 6,753         | 11,734         | 60,346         | 18,616              |
| Georgia                            | 2,202         | 3,041         | 14,876         | 5,479          | 3,531         | 5,839          | 30,024         | 11,307              |
| Atlanta                            | 536           | 1,023         | 4,356          | 1,635          | 1,164         | 1,745          | 7,092          | 3,828               |

**Web-table 3.3: Number of patients included in survival analyses, by continent, country and registry: patients diagnosed during 2010-2014**

|                     | Oesophagus    | Stomach        | Colon          | Rectum         | Liver          | Pancreas      | Lung           | Melanoma<br>of skin |
|---------------------|---------------|----------------|----------------|----------------|----------------|---------------|----------------|---------------------|
| Hawaii              | 275           | 746            | 2,512          | 1,026          | 886            | 1,085         | 3,642          | 1,382               |
| Idaho               | 380           | 406            | 2,194          | 850            | 493            | 1,010         | 4,019          | 2,047               |
| Indiana             | 1,934         | 2,002          | 11,420         | 4,034          | 2,299          | 4,496         | 24,988         | 5,932               |
| Iowa                | 1,011         | 875            | 6,117          | 2,004          | 1,025          | 2,318         | 11,054         | 3,984               |
| Kentucky            | 1,211         | 1,579          | 9,137          | 3,226          | 1,834          | 3,175         | 22,659         | 5,608               |
| Louisiana           | 1,192         | 1,813          | 8,639          | 3,114          | 2,096          | 3,305         | 16,679         | 3,637               |
| Maine               | 465           | 350            | 1,949          | 714            | 351            | 919           | 4,830          | 1,444               |
| Massachusetts       | -             | -              | -              | -              | -              | -             | -              | -                   |
| Michigan            | 2,482         | 3,001          | 13,038         | 4,623          | 2,952          | 5,902         | 29,581         | 7,614               |
| Detroit             | 1,108         | 1,656          | 6,774          | 2,484          | 1,784          | 3,201         | 14,915         | 3,305               |
| Minnesota           | 1,108         | 1,318          | 6,642          | 2,385          | 1,147          | 2,624         | 11,902         | 6,141               |
| Mississippi         | 783           | 1,107          | 6,122          | 1,909          | 1,201          | 2,227         | 11,982         | 2,582               |
| Missouri            | -             | -              | -              | -              | -              | -             | -              | -                   |
| Montana             | 307           | 287            | 1,788          | 615            | 314            | 675           | 3,307          | 1,419               |
| Nebraska            | 503           | 522            | 3,353          | 1,122          | 542            | 1,200         | 5,779          | 1,944               |
| New Hampshire       | 522           | 425            | 2,106          | 852            | 403            | 920           | 4,856          | 1,998               |
| New Jersey          | 2,263         | 3,921          | 16,104         | 5,202          | 3,503          | 6,724         | 27,024         | 9,806               |
| New Mexico          | 428           | 757            | 2,841          | 1,095          | 1,029          | 1,179         | 4,436          | 1,651               |
| New York            | 5,014         | 9,417          | 33,302         | 11,310         | 9,037          | 14,895        | 62,540         | -                   |
| New York City       | 1,506         | 4,550          | 13,042         | 4,435          | 4,576          | 5,572         | 19,652         | -                   |
| North Carolina      | 2,372         | 3,379          | 15,014         | 5,355          | 3,995          | 6,490         | 35,719         | 11,499              |
| Ohio                | 3,415         | 4,133          | 20,584         | 6,981          | 3,938          | 7,775         | 43,505         | 12,238              |
| Oklahoma            | 164           | 207            | 1,279          | 421            | 226            | 448           | 2,648          | 548                 |
| Oregon              | 896           | 1,000          | 4,804          | 1,840          | 1,537          | 2,166         | 10,054         | 4,532               |
| Pennsylvania        | 4,091         | 5,177          | 25,651         | 8,401          | 5,839          | 10,602        | 49,067         | 16,079              |
| Rhode Island        | 312           | 483            | 1,743          | 643            | 464            | 747           | 4,073          | 1,283               |
| South Carolina      | 1,322         | 1,795          | 7,791          | 2,711          | 1,871          | 3,390         | 17,719         | 5,391               |
| Tennessee           | 632           | 815            | 4,434          | 1,485          | 903            | 1,560         | 10,389         | 2,762               |
| Texas               | 3,615         | 6,163          | 27,760         | 9,371          | 9,883          | 10,410        | 48,094         | 11,973              |
| Utah                | 379           | 498            | 2,599          | 1,027          | 663            | 1,232         | 3,040          | 3,999               |
| Vermont             | 192           | 150            | 843            | 318            | 174            | 380           | 1,945          | 849                 |
| Washington          | -             | -              | -              | -              | -              | -             | -              | -                   |
| Seattle             | 1,183         | 1,561          | 6,771          | 2,684          | 2,448          | 3,123         | 13,659         | 6,516               |
| West Virginia       | 658           | 772            | 4,151          | 1,439          | 679            | 1,384         | 9,529          | 2,115               |
| Wisconsin           | 1,342         | 1,693          | 7,528          | 2,536          | 1,529          | 3,275         | 15,045         | 5,376               |
| Wyoming             | 122           | 124            | 679            | 234            | 128            | 218           | 1,124          | 516                 |
| <b>ASIA</b>         | <b>76,779</b> | <b>347,710</b> | <b>289,499</b> | <b>140,505</b> | <b>215,306</b> | <b>84,097</b> | <b>371,554</b> | <b>11,932</b>       |
| Chinese registries  | 28,456        | 36,522         | 16,364         | 14,280         | 29,496         | 8,754         | 59,948         | 686                 |
| Beijing             | 2,618         | 6,558          | 7,754          | 5,065          | 6,174          | 3,218         | 20,674         | 305                 |
| Changle             | 228           | 1,502          | 198            | 229            | 801            | 80            | 788            | 8                   |
| Cixian              | 2,269         | 1,439          | 151            | 153            | 476            | 64            | 1,065          | 3                   |
| Dafeng              | 1,333         | 1,281          | 235            | 376            | 1,042          | 295           | 1,720          | 9                   |
| Dalian              | 710           | 3,277          | 2,153          | 1,941          | 2,236          | 1,013         | 6,824          | 75                  |
| Donghai             | 846           | 1,010          | 205            | 305            | 1,018          | 204           | 2,080          | 5                   |
| Feicheng            | 3,468         | 1,839          | 221            | 377            | 952            | 139           | 2,020          | 6                   |
| Ganyu               | 1,669         | 938            | 167            | 439            | 962            | 165           | 2,100          | 8                   |
| Guanyun             | 1,074         | 864            | 197            | 253            | 1,270          | 220           | 1,470          | 16                  |
| Haimen              | 733           | 1,782          | 711            | 685            | 2,156          | 568           | 3,513          | 35                  |
| Haining             | 307           | 634            | 515            | 371            | 585            | 355           | 1,651          | 26                  |
| Jianhu              | 2,456         | 3,029          | 162            | 460            | 1,022          | 246           | 1,653          | 13                  |
| Jiashan             | 228           | 587            | 482            | 326            | 585            | 251           | 1,191          | 18                  |
| Jintan              | 1,268         | 1,844          | 330            | 291            | 543            | 228           | 1,058          | 18                  |
| Lianyungang         | 706           | 918            | 310            | 331            | 898            | 226           | 1,748          | 20                  |
| Linzhou             | 3,455         | 3,548          | 351            | 427            | 659            | 82            | 910            | 26                  |
| Qidong              | 540           | 1,894          | 573            | 960            | 3,280          | 757           | 3,600          | 33                  |
| Sihui               | 97            | 171            | 225            | 197            | 609            | 33            | 693            | 11                  |
| Taixing             | 2,716         | 1,571          | 225            | 236            | 2,006          | 275           | 1,527          | 7                   |
| Yangzhong           | 1,032         | 1,323          | 151            | 168            | 293            | 49            | 356            | 14                  |
| Zhongshan           | 703           | 513            | 1,048          | 690            | 1,929          | 286           | 3,307          | 30                  |
| Cyprus *            | 38            | 395            | 1,326          | 408            | 137            | 295           | 1,340          | 321                 |
| Hong Kong *         | -             | -              | 15,383         | 6,770          | -              | -             | -              | -                   |
| Indian registries   | 75            | 118            | 79             | 82             | 106            | 57            | 402            | 20                  |
| Guwahati            | -             | -              | -              | -              | -              | -             | -              | -                   |
| Karunagappally      | 75            | 118            | 79             | 82             | 106            | 57            | 402            | 20                  |
| Iran (Golestan)     | -             | -              | -              | -              | -              | -             | -              | -                   |
| Israel *            | 489           | 2,924          | 9,552          | 2,701          | 735            | 2,706         | 8,466          | 4,032               |
| Japanese registries | 20,804        | 121,668        | 86,400         | 32,191         | 33,940         | 29,443        | 93,765         | 1,337               |
| Aichi               | 3,578         | 20,983         | 17,700         | 6,910          | 6,668          | 6,178         | 20,192         | 275                 |
| Akita               | 1,518         | 8,504          | 5,633          | 1,929          | 1,342          | 1,759         | 4,661          | 79                  |
| Ehime               | 761           | 5,802          | 3,659          | 1,379          | 2,284          | 1,421         | 4,700          | 73                  |
| Fukui               | -             | -              | -              | -              | -              | -             | -              | -                   |
| Gunma               | 704           | 4,190          | 2,858          | 1,189          | 1,448          | 1,281         | 3,881          | 46                  |
| Hiroshima           | -             | -              | -              | -              | -              | -             | -              | -                   |
| Hyogo               | 2,536         | 13,655         | 9,398          | 3,484          | 5,185          | 3,265         | 11,799         | 134                 |
| Ibaraki             | 1,104         | 7,147          | 4,804          | 2,015          | 2,060          | 1,758         | 5,760          | 82                  |
| Kanagawa            | 5,188         | 26,931         | 21,115         | 7,759          | 7,181          | 6,231         | 19,824         | 312                 |

Web-table 3.3: Number of patients included in survival analyses, by continent, country and registry: patients diagnosed during 2010-2014

|                          | Oesophagus     | Stomach        | Colon          | Rectum         | Liver         | Pancreas       | Lung           | Melanoma<br>of skin |
|--------------------------|----------------|----------------|----------------|----------------|---------------|----------------|----------------|---------------------|
| Miyagi                   | 443            | 2,280          | 1,406          | 560            | 435           | 469            | 1,597          | 28                  |
| Niigata                  | 2,201          | 13,644         | 7,577          | 2,620          | 2,017         | 2,791          | 8,420          | 108                 |
| Osaka                    | -              | -              | -              | -              | -             | -              | -              | -                   |
| Saga                     | 330            | 2,637          | 1,755          | 536            | 1,209         | 686            | 2,065          | 35                  |
| Tochigi                  | 1,113          | 6,899          | 4,982          | 1,842          | 2,017         | 1,641          | 5,174          | 81                  |
| Yamagata                 | 939            | 6,885          | 3,798          | 1,329          | 1,134         | 1,360          | 4,114          | 61                  |
| Yamanashi                | 389            | 2,111          | 1,715          | 639            | 960           | 603            | 1,578          | 23                  |
| Jordan *                 | 138            | 733            | 2,065          | 706            | 204           | 500            | 1,796          | 55                  |
| Korea * ‡                | 11,384         | 151,968        | 87,388         | 49,894         | 77,526        | 25,899         | 105,488        | 2,499               |
| Kuwait *                 | 39             | 69             | 346            | 115            | 87            | 92             | 188            | 6                   |
| Malaysia (Penang)        | 92             | 302            | 774            | 325            | 271           | 186            | 892            | -                   |
| Mongolia *               | -              | -              | -              | -              | -             | -              | -              | -                   |
| Qatar *                  | 34             | 181            | 417            | 131            | 203           | 97             | 236            | 31                  |
| Singapore *              | 490            | 2,382          | 6,760          | 2,427          | 2,940         | 1,560          | 6,797          | 150                 |
| Taiwan *                 | 11,941         | 19,078         | 48,129         | 22,846         | 57,035        | 9,605          | 57,020         | 1,188               |
| Thai registries          | 1,239          | 1,858          | 5,261          | 2,901          | 10,462        | 1,188          | 10,065         | 266                 |
| Bangkok                  | 498            | 748            | 2,355          | 1,071          | 3,024         | 583            | 3,636          | 67                  |
| Khon Kaen                | 86             | 287            | 875            | 514            | 3,517         | 123            | 1,559          | 61                  |
| Lampang                  | 67             | 293            | 549            | 402            | 1,636         | 180            | 1,794          | 31                  |
| Lamphun                  | 35             | 130            | 263            | 171            | 520           | 56             | 971            | 18                  |
| Lopburi                  | 177            | 260            | 552            | 315            | 1,015         | 99             | 767            | 37                  |
| Songkhla                 | 376            | 140            | 667            | 428            | 750           | 147            | 1,338          | 52                  |
| Turkish registries       | 1,560          | 9,512          | 9,255          | 4,728          | 2,164         | 3,715          | 25,151         | 1,341               |
| Ankara                   | 554            | 3,741          | 3,479          | 1,750          | 818           | 1,375          | 7,581          | 537                 |
| Antalya                  | 63             | 426            | 649            | 314            | 168           | 303            | 1,646          | 104                 |
| Bursa                    | 152            | 1,088          | 881            | 559            | 152           | 380            | 2,881          | 130                 |
| Edirne                   | 23             | 194            | 227            | 89             | 62            | 80             | 741            | 27                  |
| Erzurum                  | 268            | 609            | 166            | 70             | 57            | 76             | 575            | 25                  |
| Eskisehir                | 38             | 335            | 411            | 181            | 74            | 154            | 1,107          | 1                   |
| Izmir                    | 355            | 1,962          | 2,648          | 1,300          | 654           | 1,019          | 8,299          | 389                 |
| Samsun                   | 82             | 621            | 469            | 286            | 109           | 197            | 1,428          | 76                  |
| Trabzon                  | 25             | 536            | 325            | 179            | 70            | 131            | 893            | 52                  |
| <b>EUROPE</b>            | <b>100,718</b> | <b>189,805</b> | <b>573,357</b> | <b>263,488</b> | <b>93,659</b> | <b>174,724</b> | <b>769,586</b> | <b>248,574</b>      |
| Austria *                | 1,903          | 5,831          | 14,820         | 7,043          | 3,609         | 6,830          | 19,681         | 7,517               |
| Belarus (Childhood) †    | -              | -              | -              | -              | -             | -              | -              | -                   |
| Belgium *                | 4,827          | 6,971          | 30,456         | 13,166         | 3,975         | 7,980          | 40,288         | 11,866              |
| Bulgaria *               | -              | 6,693          | 13,679         | 7,828          | 1,975         | -              | 17,296         | 2,359               |
| Croatia *                | 966            | 4,377          | 10,272         | 4,998          | 2,012         | 3,002          | 13,751         | 2,855               |
| Czech Republic *         | 3,079          | 7,678          | 28,303         | 12,035         | 4,491         | 10,559         | 32,383         | 10,694              |
| Denmark *                | 2,554          | 2,736          | 15,037         | 8,426          | 2,008         | 4,857          | 22,752         | 10,813              |
| Estonia *                | 205            | 1,100          | 1,728          | 753            | 247           | 696            | 2,202          | 599                 |
| Finland *                | 1,394          | 2,980          | 9,606          | 4,740          | 2,018         | 4,526          | 11,422         | 6,586               |
| French registries        | 1,090          | 1,484          | 6,009          | 2,146          | 1,932         | 2,101          | 6,478          | 1,923               |
| Bas-Rhin                 | 85             | 128            | 462            | 163            | 154           | 191            | 604            | 257                 |
| Basse Normandie          | -              | -              | -              | -              | -             | -              | -              | -                   |
| Burgundy Digestive       | 102            | 139            | 534            | 170            | 147           | 199            | -              | -                   |
| Calvados                 | -              | -              | -              | -              | -             | -              | 435            | -                   |
| Calvados Digestive       | 74             | 75             | 280            | 140            | 108           | 103            | -              | -                   |
| Côte-d'Or Gynaecologic   | -              | -              | -              | -              | -             | -              | -              | -                   |
| Côte-d'Or Haematopoietic | -              | -              | -              | -              | -             | -              | -              | -                   |
| Doubs                    | 21             | 58             | 222            | 90             | 70            | 84             | 306            | 81                  |
| Finistère                | 108            | 136            | 520            | 190            | 160           | 136            | -              | -                   |
| Gironde CNS              | -              | -              | -              | -              | -             | -              | -              | -                   |
| Gironde General          | 85             | 128            | 699            | 214            | 171           | 213            | 933            | 268                 |
| Gironde Haematopoietic   | -              | -              | -              | -              | -             | -              | -              | -                   |
| Haut-Rhin                | 56             | 108            | 311            | 105            | 115           | 111            | 406            | 205                 |
| Haute-Vienne             | -              | -              | -              | -              | -             | -              | -              | -                   |
| Hérault                  | 68             | 116            | 555            | 157            | 184           | 208            | 736            | 138                 |
| Isère                    | 66             | 128            | 451            | 164            | 161           | 193            | 628            | 257                 |
| Lille Metro              | 72             | 67             | 331            | 120            | 102           | 94             | 459            | 99                  |
| Loire-Atlantique         | 191            | 189            | 893            | 337            | 362           | 290            | 1,025          | 476                 |
| Manche                   | 60             | 87             | 271            | 120            | 77            | 78             | 305            | 88                  |
| Somme                    | 68             | 65             | 242            | 102            | 82            | 93             | 377            | -                   |
| Tarn                     | 34             | 60             | 238            | 74             | 39            | 108            | 264            | 54                  |
| France Childhood Haem †  | -              | -              | -              | -              | -             | -              | -              | -                   |
| France Childhood Solid † | -              | -              | -              | -              | -             | -              | -              | -                   |
| German registries        | 9,430          | 23,443         | 59,203         | 31,545         | 10,790        | 21,560         | 71,772         | 28,727              |
| Brandenburg              | 982            | 2,425          | 5,655          | 3,426          | 1,177         | 2,292          | 8,030          | 2,463               |
| Bremen                   | 275            | 486            | 1,352          | 665            | 227           | 511            | 2,134          | 506                 |
| Hamburg                  | 647            | 1,089          | 3,235          | 1,458          | 599           | 1,266          | 4,556          | 1,334               |
| Lower Saxony             | 2,427          | 6,115          | 16,393         | 7,734          | 2,084         | 5,408          | 18,930         | 9,162               |
| Mecklenburg-W. Pomerania | 737            | 1,862          | 3,840          | 2,138          | 923           | 1,622          | 5,480          | 1,697               |
| Rhineland Palatinate     | 1,086          | 2,522          | 7,432          | 3,684          | 1,184         | 2,125          | 7,854          | 4,625               |
| Saarland                 | 218            | 580            | 1,631          | 815            | 339           | 455            | 2,322          | 603                 |
| Saxony                   | 1,588          | 4,672          | 10,406         | 6,307          | 2,568         | 4,523          | 11,400         | 4,133               |

**Web-table 3.3: Number of patients included in survival analyses, by continent, country and registry: patients diagnosed during 2010-2014**

|                                | Oesophagus | Stomach | Colon  | Rectum | Liver  | Pancreas | Lung    | Melanoma<br>of skin |
|--------------------------------|------------|---------|--------|--------|--------|----------|---------|---------------------|
| Schleswig-Holstein             | 707        | 1,473   | 4,195  | 2,120  | 439    | 1,125    | 5,073   | 2,055               |
| Thuringia                      | 763        | 2,219   | 5,064  | 3,198  | 1,250  | 2,233    | 5,993   | 2,149               |
| Gibraltar *                    | -          | -       | 1      | 3      | -      | -        | 3       | 1                   |
| Greece (National Paediatric) † | -          | -       | -      | -      | -      | -        | -       | -                   |
| Iceland *                      | 106        | 147     | 519    | 210    | 79     | 190      | 879     | 208                 |
| Ireland *                      | 1,499      | 2,156   | 6,997  | 2,880  | 884    | 1,944    | 9,064   | 3,579               |
| Italian registries             | 1,794      | 13,537  | 32,887 | 8,981  | 11,154 | 11,089   | 36,238  | 9,270               |
| Alto Adige                     | 24         | 108     | 239    | 84     | 74     | 87       | 217     | 145                 |
| Barletta-Andria-Trani          | 22         | 170     | 524    | 135    | 282    | 128      | 482     | 163                 |
| Basilicata                     | 8          | 161     | 273    | 111    | 131    | 86       | 292     | 65                  |
| Bergamo                        | 142        | 950     | 1,624  | 418    | 945    | 774      | 2,184   | 638                 |
| Biella-Vercelli                | 17         | 75      | 223    | 97     | 71     | 90       | 292     | 72                  |
| Brescia                        | -          | -       | -      | -      | -      | -        | -       | -                   |
| Brindisi                       | -          | -       | -      | -      | -      | -        | -       | -                   |
| Caserta                        | 12         | 148     | 400    | 99     | 174    | 84       | 467     | 79                  |
| Catania-Messina-Enna           | 93         | 955     | 2,954  | 781    | 674    | 870      | 2,867   | 519                 |
| Catanzaro                      | -          | -       | -      | -      | -      | -        | -       | -                   |
| Como                           | 30         | 317     | 672    | 159    | 249    | 239      | 692     | 234                 |
| Cremona                        | 31         | 152     | 223    | 40     | 102    | 87       | 267     | 46                  |
| Ferrara                        | 40         | 171     | 631    | 139    | 143    | 207      | 721     | 118                 |
| Friuli-Venezia-Giulia          | 93         | 379     | 999    | 271    | 232    | 254      | 829     | 305                 |
| Genoa                          | -          | -       | -      | -      | -      | -        | -       | -                   |
| Latina                         | 34         | 238     | 603    | 153    | 130    | 155      | 685     | 169                 |
| Lecce                          | -          | -       | -      | -      | -      | -        | -       | -                   |
| Mantova                        | 15         | 124     | 229    | 68     | 77     | 104      | 308     | 71                  |
| Milano                         | 149        | 886     | 2,144  | 583    | 767    | 762      | 2,608   | 674                 |
| Modena                         | 60         | 495     | 1,233  | 301    | 375    | 469      | 1,449   | 360                 |
| Monza-Brianza                  | 90         | 663     | 1,334  | 408    | 543    | 545      | 1,626   | 403                 |
| Naples                         | 56         | 598     | 1,465  | 376    | 978    | 382      | 2,008   | 404                 |
| Nuoro                          | 36         | 133     | 347    | 128    | 172    | 147      | 281     | 38                  |
| Palermo                        | 63         | 483     | 1,934  | 591    | 629    | 570      | 1,922   | 327                 |
| Parma                          | 100        | 690     | 1,475  | 312    | 647    | 660      | 1,669   | 564                 |
| Pavia                          | -          | -       | -      | -      | -      | -        | -       | -                   |
| Piacenza                       | 38         | 227     | 332    | 93     | 145    | 149      | 486     | 95                  |
| Ragusa                         | 26         | 248     | 897    | 236    | 277    | 251      | 787     | 178                 |
| Reggio Emilia                  | 33         | 384     | 798    | 197    | 237    | 353      | 953     | 296                 |
| Romagna                        | 86         | 1,343   | 2,461  | 654    | 505    | 908      | 2,879   | 887                 |
| Salerno                        | -          | -       | -      | -      | -      | -        | -       | -                   |
| Sassari                        | 54         | 111     | 510    | 141    | 211    | 177      | 527     | 99                  |
| Siracusa                       | 12         | 157     | 608    | 159    | 195    | 181      | 626     | 105                 |
| Sondrio                        | 24         | 103     | 204    | 51     | 107    | 99       | 304     | 52                  |
| Taranto                        | 26         | 304     | 843    | 234    | 296    | 248      | 925     | 224                 |
| Trapani                        | 5          | 70      | 201    | 56     | 47     | 64       | 222     | 62                  |
| Trento                         | 39         | 109     | 311    | 85     | 96     | 99       | 216     | 83                  |
| Turin                          | 96         | 498     | 1,824  | 574    | 495    | 526      | 2,037   | 514                 |
| Tuscany                        | -          | -       | -      | -      | -      | -        | -       | -                   |
| Umbria                         | 101        | 1,304   | 2,623  | 753    | 632    | 786      | 2,428   | 699                 |
| Varese                         | 134        | 674     | 1,548  | 425    | 467    | 489      | 1,764   | 497                 |
| Veneto                         | -          | -       | -      | -      | -      | -        | -       | -                   |
| Viterbo                        | 5          | 109     | 201    | 69     | 49     | 59       | 218     | 85                  |
| Piedmont Childhood             | -          | -       | -      | -      | -      | -        | -       | -                   |
| Latvia *                       | 482        | 2,098   | 2,942  | 1,644  | 238    | 440      | 3,564   | 976                 |
| Lithuania *                    | 483        | 2,496   | 2,827  | 1,733  | 471    | 1,190    | 3,865   | 961                 |
| Malta *                        | 70         | 199     | 663    | 256    | 64     | 285      | 780     | 201                 |
| Netherlands *                  | 10,230     | 9,613   | 47,954 | 21,175 | 2,909  | 11,415   | 59,221  | 25,786              |
| Norway *                       | 1,221      | 2,307   | 13,613 | 5,751  | 831    | 2,499    | 12,634  | 8,702               |
| Poland *                       | 6,613      | 27,302  | 55,223 | 30,199 | 7,662  | 17,488   | 108,170 | 14,461              |
| Greater Poland                 | 665        | 2,507   | 5,569  | 2,683  | 780    | 1,779    | 9,472   | 1,345               |
| Holy Cross                     | 226        | 985     | 1,961  | 1,113  | 208    | 636      | 3,797   | 538                 |
| Kuiavia-Pomerania              | 396        | 1,610   | 3,397  | 1,774  | 460    | 944      | 7,424   | 684                 |
| Lesser Poland                  | 547        | 2,539   | 4,317  | 2,582  | 570    | 1,544    | 7,920   | 1,519               |
| Łódź                           | 560        | 1,931   | 3,786  | 2,187  | 572    | 1,304    | 7,434   | 1,022               |
| Lower Silesia                  | 546        | 2,381   | 4,894  | 2,569  | 1,148  | 1,522    | 9,218   | 978                 |
| Lublin                         | 275        | 1,403   | 2,958  | 1,787  | 331    | 899      | 5,820   | 645                 |
| Lubush                         | 145        | 727     | 1,520  | 860    | 166    | 388      | 2,759   | 317                 |
| Mazovia                        | 629        | 2,636   | 6,297  | 3,572  | 712    | 1,937    | 13,398  | 2,099               |
| Opole                          | 186        | 809     | 1,550  | 925    | 181    | 478      | 2,768   | 403                 |
| Podlaha                        | 191        | 752     | 1,595  | 916    | 196    | 429      | 2,514   | 326                 |
| Pomerania                      | 428        | 1,773   | 3,782  | 1,797  | 528    | 1,042    | 7,425   | 1,046               |
| Silesia                        | 945        | 3,642   | 6,518  | 3,637  | 849    | 2,271    | 13,360  | 1,655               |
| Subcarpathia                   | 324        | 1,551   | 2,614  | 1,621  | 325    | 1,059    | 4,635   | 810                 |
| Varmia-Mazuria                 | 231        | 1,081   | 2,049  | 1,008  | 323    | 579      | 4,991   | 447                 |
| West Pomerania                 | 319        | 975     | 2,416  | 1,168  | 313    | 677      | 5,235   | 627                 |
| Portugal *                     | 1,603      | 7,352   | 15,965 | 6,546  | 1,323  | 2,673    | 11,656  | 3,068               |
| Azores                         | 58         | 234     | 340    | 135    | 51     | 130      | 609     | 104                 |
| Portugal Central               | 107        | 551     | 1,020  | 465    | 75     | 111      | 509     | 134                 |
| Portugal North                 | 190        | 1,173   | 1,618  | 664    | 178    | 225      | 1,285   | 255                 |
| Portugal South                 | 1,248      | 5,394   | 12,987 | 5,282  | 1,019  | 2,207    | 9,253   | 2,575               |

Web-table 3.3: Number of patients included in survival analyses, by continent, country and registry: patients diagnosed during 2010-2014

|                              | Oesophagus     | Stomach        | Colon            | Rectum         | Liver          | Pancreas       | Lung             | Melanoma<br>of skin |
|------------------------------|----------------|----------------|------------------|----------------|----------------|----------------|------------------|---------------------|
| Romania (Cluj)               | 114            | 554            | 744              | 290            | 311            | 295            | 951              | 221                 |
| Russian registries ‡         | 2,262          | 10,849         | 11,382           | 6,508          | 1,344          | 4,097          | 15,254           | 1,975               |
| Arkhangelsk                  | 700            | 2,376          | 2,066            | 1,157          | 330            | 786            | 2,893            | 468                 |
| Karelia                      | 313            | 1,208          | 1,176            | 511            | 85             | 415            | 1,401            | 269                 |
| Omsk                         | 266            | 1,679          | 1,892            | 1,027          | 159            | 576            | 2,597            | -                   |
| Samara                       | 727            | 4,320          | 5,049            | 3,161          | 721            | 1,827          | 6,484            | 1,238               |
| Tomsk                        | 256            | 1,266          | 1,199            | 652            | 49             | 493            | 1,879            | -                   |
| Slovakia *                   | 308            | 908            | 2,614            | 1,152          | 392            | 849            | 2,578            | 706                 |
| Slovenia *                   | 328            | 1,872          | 4,164            | 2,041          | 676            | 1,366          | 4,850            | 2,016               |
| Spanish registries           | 1,303          | 4,089          | 14,073           | 4,579          | 2,890          | 3,275          | 13,031           | 2,629               |
| Basque Country               | 615            | 2,071          | 6,704            | 2,075          | 1,321          | 1,497          | 5,630            | 1,062               |
| Canaries                     | 190            | 351            | 1,509            | 483            | 315            | 366            | 1,681            | 338                 |
| Girona                       | 164            | 469            | 1,594            | 556            | 341            | 378            | 1,511            | 287                 |
| Granada                      | 77             | 379            | 1,271            | 395            | 277            | 298            | 1,160            | 342                 |
| Mallorca                     | 108            | 293            | 1,102            | 438            | 265            | 260            | 1,311            | 221                 |
| Murcia                       | 45             | 185            | 686              | 202            | 133            | 162            | 594              | 144                 |
| Navarra                      | 37             | 151            | 323              | 150            | 68             | 99             | 343              | 71                  |
| Tarragona                    | 67             | 190            | 884              | 280            | 170            | 215            | 801              | 164                 |
| Spain Childhood              | -              | -              | -                | -              | -              | -              | -                | -                   |
| Valencia Childhood           | -              | -              | -                | -              | -              | -              | -                | -                   |
| Sweden *                     | 2,271          | 4,115          | 19,822           | 10,695         | 2,997          | 5,645          | 19,086           | 15,774              |
| Swiss registries             | 1,252          | 1,996          | 6,741            | 2,852          | 1,897          | 2,818          | 9,122            | 5,537               |
| Basel                        | 26             | 58             | 180              | 60             | 29             | 46             | 231              | 110                 |
| Fribourg                     | 88             | 142            | 490              | 187            | 124            | 189            | 672              | 380                 |
| Geneva                       | 118            | 176            | 706              | 283            | 238            | 318            | 946              | 600                 |
| Graubünden-Glarus            | 95             | 143            | 431              | 204            | 99             | 209            | 669              | 379                 |
| Neuchâtel                    | 68             | 84             | 418              | 165            | 104            | 160            | 559              | 231                 |
| St Gallen-Appenzell          | 193            | 296            | 1,041            | 467            | 209            | 451            | 1,310            | 830                 |
| Ticino                       | 159            | 315            | 846              | 406            | 351            | 322            | 1,223            | 514                 |
| Valais                       | 125            | 218            | 647              | 217            | 251            | 253            | 912              | 447                 |
| Zürich                       | 380            | 564            | 1,982            | 863            | 492            | 870            | 2,600            | 2,046               |
| Switzerland Childhood †      | -              | -              | -                | -              | -              | -              | -                | -                   |
| United Kingdom *             | 43,331         | 34,922         | 145,113          | 63,313         | 24,480         | 45,055         | 220,615          | 68,564              |
| England                      | 35,709         | 28,111         | 118,596          | 52,274         | 20,070         | 37,590         | 177,401          | 57,536              |
| Northern Ireland             | 1,001          | 1,115          | 4,327            | 1,736          | 548            | 1,101          | 5,747            | 1,648               |
| Scotland                     | 4,449          | 3,528          | 14,004           | 5,598          | 2,565          | 3,871          | 25,672           | 5,687               |
| Wales                        | 2,172          | 2,168          | 8,186            | 3,705          | 1,297          | 2,493          | 11,795           | 3,693               |
| <b>OCEANIA</b>               | <b>7,371</b>   | <b>10,487</b>  | <b>57,073</b>    | <b>22,296</b>  | <b>8,198</b>   | <b>14,218</b>  | <b>54,651</b>    | <b>64,046</b>       |
| Australia *                  | 5,937          | 8,643          | 46,214           | 18,079         | 6,861          | 11,899         | 45,014           | 52,525              |
| Australian Capital Territory | 62             | 92             | 590              | 205            | 75             | 162            | 389              | 557                 |
| New South Wales              | 1,321          | 2,019          | 10,918           | 4,301          | 1,680          | 2,821          | 10,516           | 12,164              |
| Northern Territory           | 44             | 37             | 233              | 82             | 90             | 72             | 303              | 262                 |
| Queensland                   | 1,475          | 1,865          | 11,456           | 4,305          | 1,560          | 2,694          | 11,339           | 18,083              |
| South Australia              | 451            | 644            | 3,679            | 1,264          | 503            | 960            | 3,347            | 2,917               |
| Tasmania                     | 238            | 206            | 1,330            | 542            | 103            | 306            | 1,217            | 1,123               |
| Victoria                     | 1,677          | 2,804          | 13,194           | 5,554          | 2,157          | 3,562          | 12,691           | 11,736              |
| Western Australia            | 669            | 976            | 4,814            | 1,826          | 693            | 1,322          | 5,212            | 5,683               |
| New Zealand *                | 1,434          | 1,844          | 10,859           | 4,217          | 1,337          | 2,319          | 9,637            | 11,521              |
| <b>Total</b>                 | <b>249,640</b> | <b>653,381</b> | <b>1,349,649</b> | <b>576,365</b> | <b>414,469</b> | <b>433,959</b> | <b>1,974,462</b> | <b>550,229</b>      |

Web-table 3.3: Number of patients included in survival analyses, by continent, country and registry: patients diagnosed during 2010-2014

|                                    | Breast<br>(women) | Cervix        | Ovary         | Prostate       | Brain<br>(adults) | Brain<br>(children) | Myeloid<br>(adults) | Lymphoid<br>(adults) | ALL<br>(children) | Lymphoma<br>(children) | Total            |
|------------------------------------|-------------------|---------------|---------------|----------------|-------------------|---------------------|---------------------|----------------------|-------------------|------------------------|------------------|
| <b>AFRICA</b>                      | <b>7,430</b>      | <b>2,013</b>  | <b>410</b>    | <b>1,500</b>   | <b>349</b>        | <b>76</b>           | <b>248</b>          | <b>919</b>           | <b>18</b>         | <b>115</b>             | <b>17,624</b>    |
| Algerian registries                | 2,321             | 287           | 184           | 382            | 194               | 38                  | 159                 | 502                  | 8                 | 49                     | 6,151            |
| Annaba                             | 726               | 27            | 39            | 88             | -                 | 6                   | 25                  | 102                  | 8                 | 8                      | 1,504            |
| Sétif                              | 301               | 39            | 15            | 39             | 54                | 5                   | 134                 | 63                   | -                 | 1                      | 1,078            |
| Tlemcen                            | 1,294             | 221           | 130           | 255            | 140               | 27                  | -                   | 337                  | -                 | 40                     | 3,569            |
| Mali (Bamako)                      | 60                | -             | -             | -              | -                 | -                   | -                   | -                    | -                 | -                      | 60               |
| Mauritius *                        | -                 | -             | -             | 288            | 36                | 3                   | 42                  | 86                   | -                 | 5                      | 1,228            |
| Morocco (Casablanca)               | 2,805             | -             | -             | -              | -                 | -                   | -                   | -                    | -                 | -                      | 2,805            |
| Nigeria (Ibadan)                   | 1,950             | 904           | 172           | 567            | 108               | 29                  | 45                  | 255                  | 8                 | 52                     | 4,626            |
| South Africa (Eastern Cape)        | 294               | 822           | 54            | 263            | 11                | 6                   | 2                   | 76                   | 2                 | 9                      | 2,754            |
| <b>AMERICA (Central and South)</b> | <b>51,174</b>     | <b>16,416</b> | <b>5,117</b>  | <b>37,300</b>  | <b>2,981</b>      | <b>2,007</b>        | <b>4,317</b>        | <b>17,503</b>        | <b>6,715</b>      | <b>2,181</b>           | <b>232,855</b>   |
| Argentinian registries             | 5,751             | 889           | 622           | 2,522          | 519               | 810                 | 600                 | 1,458                | 1,566             | 577                    | 23,061           |
| Chubut                             | 409               | 125           | 26            | 55             | 26                | -                   | 25                  | 65                   | -                 | -                      | 1,470            |
| Córdoba                            | 2,206             | 259           | 226           | 960            | 239               | -                   | 143                 | 488                  | -                 | -                      | 7,080            |
| Mendoza                            | 3,013             | 505           | 370           | 1,473          | 254               | -                   | 432                 | 905                  | -                 | -                      | 11,248           |
| Tierra del Fuego                   | 123               | -             | -             | 34             | -                 | -                   | -                   | -                    | -                 | -                      | 310              |
| Argentina (Childhood) †            | -                 | -             | -             | -              | -                 | 810                 | -                   | -                    | 1,566             | 577                    | 2,953            |
| Brazilian registries               | 11,190            | 529           | 286           | 2,042          | 271               | 40                  | 243                 | 804                  | 42                | 36                     | 31,511           |
| Aracaju                            | 578               | 143           | 74            | 655            | 49                | 9                   | 59                  | 187                  | 5                 | 6                      | 2,566            |
| Cuiabá                             | -                 | -             | -             | -              | -                 | -                   | -                   | -                    | -                 | -                      | -                |
| Curitiba                           | 1,751             | 354           | 181           | 1,197          | 198               | 27                  | 135                 | 530                  | 34                | 27                     | 7,211            |
| Goiania                            | 992               | -             | -             | -              | -                 | -                   | -                   | -                    | -                 | -                      | 1,642            |
| Jaú                                | 219               | 32            | 31            | 190            | 24                | 4                   | 49                  | 87                   | 3                 | 3                      | 1,190            |
| São Paulo                          | 7,650             | -             | -             | -              | -                 | -                   | -                   | -                    | -                 | -                      | 18,902           |
| Chilean registries                 | 857               | 332           | 155           | 1,063          | 140               | 15                  | 145                 | 436                  | 38                | 13                     | 5,994            |
| Antofagasta                        | 87                | 41            | 20            | 91             | 12                | 1                   | 9                   | 30                   | 5                 | 1                      | 638              |
| Biobio                             | 250               | 100           | 45            | 381            | 47                | 3                   | 52                  | 148                  | 16                | 3                      | 2,073            |
| Concepción                         | 268               | 96            | 46            | 224            | 43                | 7                   | 33                  | 113                  | 6                 | 4                      | 1,466            |
| Los Rios                           | 252               | 95            | 44            | 367            | 38                | 4                   | 51                  | 145                  | 11                | 5                      | 1,817            |
| Colombian registries               | 3,277             | 1,481         | 603           | 3,052          | 565               | 92                  | 554                 | 1,712                | 15                | 7                      | 19,255           |
| Bucaramanga                        | -                 | 305           | -             | -              | -                 | -                   | -                   | -                    | -                 | -                      | 950              |
| Cali                               | 2,834             | 941           | 506           | 2,640          | 503               | 80                  | 487                 | 1,473                | -                 | -                      | 15,598           |
| Manizales                          | 271               | 115           | 38            | 266            | 23                | 1                   | 23                  | 106                  | 5                 | 2                      | 1,499            |
| Pasto                              | 172               | 120           | 59            | 146            | 39                | 11                  | 44                  | 133                  | 10                | 5                      | 1,208            |
| Costa Rica *                       | 5,453             | 2,583         | 550           | 4,638          | 428               | 83                  | 315                 | 1,885                | 236               | 56                     | 25,653           |
| Cuba *                             | 10,279            | 3,982         | 1,154         | 6,862          | -                 | -                   | -                   | 2,220                | -                 | 106                    | 35,003           |
| Ecuadorian registries              | 3,565             | 2,080         | 713           | 3,485          | 674               | 144                 | 676                 | 2,761                | 345               | 136                    | 22,654           |
| Cuenca Ecuador                     | 196               | 103           | 67            | 283            | 31                | 8                   | 33                  | 176                  | 21                | 6                      | 1,428            |
| Guayaquil                          | 1,474             | 889           | 266           | 1,014          | 265               | 66                  | 309                 | 942                  | 163               | 49                     | 8,399            |
| Loja                               | 99                | 104           | 30            | 119            | 30                | 9                   | 41                  | 111                  | 15                | 5                      | 959              |
| Manabí                             | 517               | 389           | 88            | 465            | 74                | 17                  | 78                  | 393                  | 53                | 28                     | 3,476            |
| Quito                              | 1,279             | 595           | 262           | 1,604          | 274               | 44                  | 215                 | 1,139                | 93                | 48                     | 8,392            |
| Guadeloupe *                       | 913               | 117           | 70            | 2,345          | 37                | 9                   | 93                  | 308                  | 4                 | 4                      | 5,399            |
| Martinique *                       | 625               | 78            | 40            | 1,592          | 50                | 6                   | 123                 | 342                  | 8                 | 1                      | 4,045            |
| Mexico (Childhood) †               | -                 | -             | -             | -              | -                 | 775                 | -                   | -                    | 4,147             | 1,105                  | 6,027            |
| Peru (Lima)                        | 5,590             | 2,917         | -             | -              | -                 | -                   | 891                 | 3,653                | 268               | 112                    | 17,226           |
| Puerto Rico *                      | 3,674             | 505           | 343           | 5,795          | 297               | 33                  | 677                 | 1,924                | 46                | 28                     | 20,215           |
| Uruguay *                          | -                 | 923           | 581           | 3,904          | -                 | -                   | -                   | -                    | -                 | -                      | 16,812           |
| <b>AMERICA (North)</b>             | <b>779,255</b>    | <b>45,736</b> | <b>91,724</b> | <b>739,463</b> | <b>82,641</b>     | <b>8,524</b>        | <b>173,382</b>      | <b>426,976</b>       | <b>9,017</b>      | <b>4,244</b>           | <b>4,281,793</b> |
| Canadian registries                | 88,008            | 5,405         | 11,312        | 85,477         | 12,547            | 909                 | 24,188              | 54,479               | 1,038             | 389                    | 526,015          |
| Alberta                            | 10,648            | 755           | 1,259         | 11,204         | 1,079             | 120                 | 2,306               | 6,444                | 124               | 76                     | 61,590           |
| British Columbia                   | 15,918            | 898           | 2,027         | 15,648         | 1,650             | 107                 | 3,536               | 8,891                | 150               | 66                     | 92,159           |
| Manitoba                           | 3,966             | 247           | 513           | 3,362          | 424               | 37                  | 872                 | 2,459                | 65                | 21                     | 23,438           |
| New Brunswick                      | 2,694             | 140           | 319           | 3,006          | 286               | 13                  | 550                 | 1,786                | 27                | 15                     | 17,376           |
| Newfoundland & Labrador            | 1,937             | 154           | 243           | 2,214          | 214               | 16                  | 261                 | 992                  | 19                | 6                      | 12,515           |
| Nova Scotia                        | 3,508             | 205           | 422           | 3,443          | 371               | 14                  | 551                 | 1,939                | 41                | 11                     | 22,248           |
| Ontario                            | 45,390            | 2,753         | 6,031         | 42,733         | 8,160             | 565                 | 15,362              | 29,599               | 560               | 171                    | 273,040          |
| Prince Edward Island               | 571               | 31            | 68            | 583            | 50                | 2                   | 87                  | 309                  | 5                 | 1                      | 3,397            |
| Saskatchewan                       | 3,376             | 222           | 430           | 3,284          | 313               | 35                  | 663                 | 2,060                | 47                | 22                     | 20,252           |
| US registries                      | 691,247           | 40,331        | 80,412        | 653,986        | 70,094            | 7,615               | 149,194             | 372,497              | 7,979             | 3,855                  | 3,755,778        |
| Alabama                            | 16,633            | 1,090         | 1,862         | 17,013         | 1,577             | 162                 | 2,797               | 7,857                | 161               | 69                     | 93,726           |
| Alaska                             | 1,520             | 79            | 166           | 1,200          | 176               | 19                  | 229                 | 670                  | 20                | 14                     | 7,542            |
| Arkansas                           | 3,575             | 279           | 349           | 4,538          | 417               | 47                  | 656                 | 1,876                | 41                | 19                     | 22,202           |
| California                         | 44,160            | 2,752         | 5,356         | 44,036         | 4,387             | 454                 | 8,460               | 22,859               | 738               | 293                    | 231,847          |
| Greater Bay Area                   | 22,469            | 1,108         | 2,738         | 20,552         | 2,165             | 207                 | 4,129               | 11,992               | 301               | 142                    | 115,008          |
| Greater California                 | 62,596            | 3,819         | 7,449         | 53,940         | 6,504             | 741                 | 12,154              | 31,588               | 1,021             | 418                    | 322,581          |
| Los Angeles                        | 27,392            | 1,997         | 3,656         | 23,350         | 2,372             | 240                 | 4,995               | 14,236               | 480               | 184                    | 135,998          |
| Colorado                           | 12,680            | 598           | 1,462         | 11,841         | 1,241             | 144                 | 2,394               | 6,450                | 169               | 83                     | 61,957           |
| Connecticut                        | 14,042            | 641           | 1,679         | 11,997         | 1,335             | 132                 | 2,993               | 7,695                | 111               | 70                     | 72,537           |
| Delaware                           | 3,581             | 203           | 353           | 3,798          | 300               | 32                  | 739                 | 1,932                | 29                | 24                     | 19,991           |
| Florida                            | 54,774            | 3,604         | 6,592         | 53,370         | 5,746             | 511                 | 14,866              | 29,286               | 551               | 255                    | 314,854          |
| Georgia                            | 31,064            | 1,940         | 3,355         | 30,092         | 2,948             | 369                 | 6,513               | 15,808               | 342               | 207                    | 168,937          |
| Atlanta                            | 10,783            | 601           | 1,103         | 9,876          | 939               | 114                 | 1,988               | 5,177                | 121               | 85                     | 52,166           |
| Hawaii                             | 5,110             | 258           | 473           | 3,538          | 331               | 30                  | 984                 | 2,278                | 61                | 35                     | 24,652           |
| Idaho                              | 4,881             | 241           | 560           | 5,061          | 521               | 57                  | 1,076               | 2,732                | 74                | 28                     | 26,630           |
| Indiana                            | 21,213            | 1,256         | 2,507         | 16,328         | 2,269             | 263                 | 4,564               | 11,497               | 258               | 131                    | 117,391          |
| Iowa                               | 10,355            | 526           | 1,383         | 9,919          | 1,212             | 148                 | 2,697               | 6,697                | 120               | 71                     | 61,516           |
| Kentucky                           | 15,145            | 978           | 1,666         | 13,675         | 1,756             | 194                 | 3,916               | 8,652                | 163               | 83                     | 94,657           |
| Louisiana                          | 14,997            | 1,024         | 1,490         | 17,140         | 1,363             | 198                 | 3,273               | 8,268                | 152               | 60                     | 88,440           |
| Maine                              | 4,197             | 174           | 501           | 3,644          | 436               | 35                  | 1,065               | 2,417                | 41                | 14                     | 23,546           |
| Massachusetts                      | -                 | -             | -             | -              | -                 | -                   | -                   | -                    | -                 | -                      | -                |
| Michigan                           | 27,478            | 1,357         | 3,381         | 29,858         | 2,747             | 279                 | 5,909               | 15,278               | 295               | 156                    | 155,931          |
| Detroit                            | 14,138            | 727           | 1,804         | 16,139         | 1,261             | 139                 | 3,294               | 8,030                | 154               | 81                     | 80,994           |
| Minnesota                          | 14,624            | 621           | 1,739         | 14,318         | 1,393             | 175                 | 3,392               | 8,840                | 186               | 90                     | 78,645           |
| Mississippi                        | 9,601             | 732           | 1,010         | 10,549         | 962               | 101                 | 1,864               | 4,961                | 102               | 44                     | 57,839           |
| Missouri                           | 4,041             | -             | -             | -              | -                 | -                   | -                   | -                    | -                 | -                      | 4,041            |
| Montana                            | 3,549             | 158           | 408           | 3,761          | 416               | 25                  | 870                 | 2,055                | 27                | 18                     | 19,999           |
| Nebraska                           | 6,031             | 317           | 686           | 5,874          | 666               | 85                  | 1,268               | 3,449                | 74                | 47                     | 33,462           |

Web-table 3.3: Number of patients included in survival analyses, by continent, country and registry: patients diagnosed during 2010-2014

|                     | Breast<br>(women) | Cervix        | Ovary         | Prostate       | Brain<br>(adults) | Brain<br>(children) | Myeloid<br>(adults) | Lymphoid<br>(adults) | ALL<br>(children) | Lymphoma<br>(children) | Total            |
|---------------------|-------------------|---------------|---------------|----------------|-------------------|---------------------|---------------------|----------------------|-------------------|------------------------|------------------|
| New Hampshire       | 5,390             | 162           | 587           | 5,045          | 520               | 53                  | 1,002               | 2,726                | 41                | 31                     | 27,639           |
| New Jersey          | 32,331            | 1,835         | 3,929         | 32,659         | 3,269             | 323                 | 7,270               | 18,115               | 342               | 189                    | 174,809          |
| New Mexico          | 6,184             | 384           | 814           | 5,319          | 582               | 54                  | 1,202               | 3,111                | 92                | 37                     | 31,195           |
| New York            | 69,024            | 4,022         | 8,744         | 68,991         | 6,765             | 736                 | 15,811              | 41,430               | 738               | 406                    | 362,182          |
| New York City       | 25,845            | 2,026         | 3,302         | 25,856         | 2,347             | 319                 | 5,181               | 15,437               | 306               | 169                    | 134,121          |
| North Carolina      | 34,930            | 1,828         | 3,719         | 32,363         | 3,299             | 338                 | 6,795               | 16,985               | 355               | 154                    | 184,589          |
| Ohio                | 40,639            | 2,219         | 4,491         | 36,434         | 4,045             | 474                 | 6,692               | 19,866               | 376               | 184                    | 217,989          |
| Oklahoma            | 2,392             | 181           | 235           | 2,590          | 245               | 25                  | 413                 | 1,187                | 31                | 8                      | 13,248           |
| Oregon              | 11,181            | 504           | 1,348         | 9,635          | 1,226             | 116                 | 1,886               | 5,449                | 127               | 54                     | 58,355           |
| Pennsylvania        | 48,919            | 2,502         | 6,040         | 43,972         | 4,992             | 453                 | 11,346              | 28,006               | 454               | 195                    | 271,786          |
| Rhode Island        | 3,937             | 183           | 477           | 3,178          | 367               | 33                  | 707                 | 2,192                | 30                | 22                     | 20,874           |
| South Carolina      | 17,127            | 931           | 1,737         | 16,123         | 1,691             | 147                 | 3,299               | 8,303                | 147               | 78                     | 91,573           |
| Tennessee           | 8,707             | 553           | 990           | 9,221          | 937               | 99                  | 1,695               | 4,477                | 101               | 38                     | 49,798           |
| Texas               | 55,023            | 4,552         | 6,278         | 45,069         | 6,239             | 911                 | 12,824              | 29,989               | 1,009             | 475                    | 289,638          |
| Utah                | 6,458             | 314           | 832           | 7,351          | 908               | 124                 | 1,316               | 3,808                | 164               | 69                     | 34,781           |
| Vermont             | 1,912             | 62            | 243           | 1,618          | 207               | 12                  | 326                 | 1,063                | 11                | 4                      | 10,309           |
| Washington          | -                 | -             | -             | -              | -                 | -                   | -                   | -                    | -                 | -                      | -                |
| Seattle             | 16,926            | 839           | 2,106         | 15,365         | 1,999             | 220                 | 3,900               | 9,216                | 183               | 102                    | 88,801           |
| West Virginia       | 6,561             | 480           | 853           | 5,977          | 706               | 68                  | 1,503               | 3,775                | 56                | 20                     | 40,726           |
| Wisconsin           | 15,977            | 706           | 1,944         | 15,430         | 1,734             | 174                 | 4,304               | 9,713                | 178               | 73                     | 88,557           |
| Wyoming             | 1,304             | 85            | 173           | 1,461          | 163               | 15                  | 278                 | 745                  | 12                | 7                      | 7,388            |
| <b>ASIA</b>         | <b>305,023</b>    | <b>53,611</b> | <b>42,771</b> | <b>176,273</b> | <b>29,009</b>     | <b>2,894</b>        | <b>57,844</b>       | <b>117,413</b>       | <b>3,701</b>      | <b>2,282</b>           | <b>2,328,203</b> |
| Chinese registries  | 24,515            | 6,714         | 4,668         | 6,306          | 4,918             | 203                 | 5,516               | 8,693                | 233               | 77                     | 256,349          |
| Beijing             | 11,317            | 1,402         | 2,249         | 3,787          | 1,426             | 64                  | 2,506               | 4,028                | 120               | 21                     | 79,286           |
| Changle             | 226               | 152           | 51            | 42             | 90                | 6                   | 57                  | 135                  | 5                 | 2                      | 4,600            |
| Cixian              | 232               | 138           | 37            | 15             | 83                | 3                   | 90                  | 77                   | 14                | 7                      | 6,316            |
| Dafeng              | 445               | 406           | 113           | 73             | 156               | 4                   | 136                 | 41                   | -                 | -                      | 7,665            |
| Dalian              | 3,621             | 1,019         | 554           | 543            | 281               | 10                  | 368                 | 960                  | 29                | 8                      | 25,622           |
| Donghai             | 497               | 191           | 78            | 53             | 217               | 8                   | 231                 | 226                  | 5                 | 3                      | 7,182            |
| Feicheng            | 561               | 99            | 135           | 80             | 174               | 7                   | 55                  | 42                   | 1                 | -                      | 10,176           |
| Ganyu               | 528               | 157           | 92            | 55             | 258               | 9                   | 139                 | 198                  | 1                 | 1                      | 7,886            |
| Guanyun             | 513               | 190           | 85            | 36             | 187               | 9                   | 171                 | 199                  | 3                 | 6                      | 6,763            |
| Haimen              | 852               | 473           | 234           | 270            | 329               | 16                  | 312                 | 475                  | 3                 | 5                      | 13,152           |
| Haining             | 575               | 183           | 101           | 190            | 120               | 2                   | 144                 | 240                  | 4                 | 1                      | 6,004            |
| Jianhu              | 326               | 373           | 58            | 60             | 180               | 10                  | 107                 | 195                  | 1                 | 6                      | 10,357           |
| Jiashan             | 409               | 95            | 57            | 115            | 96                | 4                   | 70                  | 137                  | 2                 | -                      | 4,653            |
| Jintan              | 419               | 207           | 87            | 91             | 79                | 1                   | 79                  | 125                  | 2                 | -                      | 6,670            |
| Lianyungang         | 736               | 285           | 129           | 127            | 147               | 5                   | 146                 | 275                  | 7                 | 2                      | 7,016            |
| Linzhou             | 537               | 349           | 120           | 34             | 373               | 10                  | 169                 | 124                  | 1                 | 5                      | 11,180           |
| Qidong              | 894               | 308           | 135           | 302            | 337               | 5                   | 248                 | 540                  | 1                 | -                      | 14,407           |
| Sihui               | 221               | 76            | 37            | 39             | 61                | 9                   | 82                  | 111                  | 8                 | 3                      | 2,683            |
| Taixing             | 316               | 147           | 68            | 64             | 127               | -                   | 120                 | 54                   | -                 | 1                      | 9,460            |
| Yangzhong           | 196               | 93            | 38            | 18             | 29                | -                   | 14                  | 33                   | -                 | -                      | 3,807            |
| Zhongshan           | 1,094             | 371           | 210           | 312            | 168               | 21                  | 272                 | 478                  | 26                | 6                      | 11,464           |
| Cyprus *            | 2,550             | 168           | 281           | 2,112          | 193               | 4                   | 262                 | 1,126                | 22                | 6                      | 10,984           |
| Hong Kong *         | 16,355            | 2,132         | -             | -              | -                 | -                   | -                   | -                    | -                 | -                      | 40,640           |
| Indian registries   | 363               | 338           | 71            | 85             | 61                | 8                   | 52                  | 122                  | 7                 | 6                      | 2,052            |
| Guwahati            | -                 | 255           | -             | -              | -                 | -                   | -                   | -                    | -                 | -                      | 255              |
| Karunagappally      | 363               | 83            | 71            | 85             | 61                | 8                   | 52                  | 122                  | 7                 | 6                      | 1,797            |
| Iran (Golestan)     | -                 | -             | -             | -              | -                 | -                   | -                   | -                    | -                 | -                      | -                |
| Israel *            | 16,364            | 943           | 1,645         | 9,371          | 1,660             | 251                 | 2,595               | 9,842                | 222               | 260                    | 74,758           |
| Japanese registries | 64,164            | 9,952         | 10,161        | 68,810         | 5,649             | 410                 | 13,669              | 30,816               | 421               | 132                    | 623,732          |
| Aichi               | 13,406            | 2,266         | 1,967         | 14,495         | 1,407             | 110                 | 3,256               | 7,229                | 122               | 36                     | 126,778          |
| Akita               | 2,846             | 339           | 476           | 3,188          | 259               | 10                  | 612                 | 407                  | 2                 | -                      | 33,564           |
| Ehime               | 3,279             | 490           | 470           | 3,380          | 384               | 13                  | 861                 | 1,781                | 23                | 7                      | 30,767           |
| Fukui               | -                 | -             | -             | -              | -                 | -                   | -                   | -                    | -                 | -                      | -                |
| Gunma               | 2,120             | 415           | 322           | 2,436          | 234               | 15                  | 679                 | 1,166                | 18                | 4                      | 23,006           |
| Hiroshima           | -                 | -             | -             | -              | -                 | -                   | -                   | -                    | -                 | -                      | -                |
| Hyogo               | 7,037             | 1,204         | 1,163         | 8,060          | 699               | 52                  | 1,957               | 3,965                | 42                | 9                      | 73,644           |
| Ibaraki             | 3,879             | 696           | 687           | 4,192          | 410               | 26                  | 1,017               | 2,093                | 25                | 5                      | 37,760           |
| Kanagawa            | 17,045            | 2,347         | 2,623         | 17,161         | 874               | 65                  | 1,382               | 6,432                | 73                | 21                     | 142,564          |
| Miyagi              | 1,133             | 152           | 160           | 1,114          | 104               | 10                  | 271                 | 502                  | 10                | 4                      | 10,678           |
| Niigata             | 4,809             | 568           | 868           | 4,639          | 424               | 31                  | 1,227               | 2,573                | 26                | 16                     | 54,559           |
| Osaka               | -                 | -             | -             | -              | -                 | -                   | -                   | -                    | -                 | -                      | -                |
| Saga                | 1,220             | 262           | 195           | 1,303          | 130               | 13                  | 431                 | 825                  | 17                | 6                      | 13,655           |
| Tochigi             | 3,732             | 711           | 633           | 4,342          | 337               | 37                  | 1,042               | 1,917                | 34                | 10                     | 36,544           |
| Yamagata            | 2,399             | 321           | 431           | 3,025          | 268               | 20                  | 592                 | 1,323                | 14                | 12                     | 28,025           |
| Yamanashi           | 1,259             | 181           | 166           | 1,475          | 119               | 8                   | 342                 | 603                  | 15                | 2                      | 12,188           |
| Jordan *            | 4,906             | 208           | -             | 996            | 521               | 180                 | 700                 | 2,419                | 212               | 158                    | 16,497           |
| Korea * ‡           | 82,450            | 18,186        | 11,653        | 45,480         | 6,911             | 700                 | 18,811              | 31,172               | 1,057             | 783                    | 729,249          |
| Kuwait *            | 987               | 42            | 67            | 224            | 79                | 9                   | 126                 | 493                  | 70                | 36                     | 3,075            |
| Malaysia (Penang)   | 1,592             | 239           | 237           | 326            | 72                | 28                  | 162                 | 429                  | 48                | 15                     | 5,990            |
| Mongolia *          | 727               | -             | -             | -              | -                 | -                   | -                   | -                    | -                 | -                      | 727              |
| Qatar *             | 939               | 84            | 100           | 358            | 131               | 12                  | 236                 | 465                  | 27                | 17                     | 3,699            |
| Singapore *         | 9,091             | 987           | 1,456         | 3,708          | 508               | 74                  | 1,551               | 3,094                | 118               | 63                     | 44,156           |
| Taiwan *            | 52,142            | 7,928         | 6,984         | 23,672         | 3,196             | 369                 | 7,498               | 16,347               | 552               | 255                    | 345,785          |
| Thai registries     | 9,828             | 3,731         | 2,106         | 2,518          | 956               | 121                 | 1,958               | 3,337                | 180               | 94                     | 58,069           |
| Bangkok             | 4,625             | 1,498         | 1,022         | 1,278          | 428               | 50                  | 692                 | 1,377                | 55                | 48                     | 23,055           |
| Khon Kaen           | 1,479             | 597           | 311           | 248            | 112               | 27                  | 503                 | 268                  | 50                | 2                      | 10,619           |
| Lampang             | 882               | 354           | 167           | 244            | 87                | 10                  | 190                 | 451                  | 10                | 9                      | 7,356            |
| Lamphun             | 554               | 358           | 129           | 134            | 83                | 7                   | 108                 | 200                  | 5                 | 7                      | 3,749            |
| Lopburi             | 1,013             | 453           | 187           | 258            | 114               | 9                   | 236                 | 342                  | 15                | 8                      | 5,857            |
| Songkhla            | 1,275             | 471           | 290           | 356            | 132               | 18                  | 229                 | 699                  | 45                | 20                     | 7,433            |
| Turkish registries  | 18,050            | 1,959         | 3,342         | 12,307         | 4,154             | 525                 | 4,708               | 9,058                | 532               | 380                    | 112,441          |
| Ankara              | 7,373             | 814           | 1,530         | 3,952          | 1,758             | 281                 | 1,244               | 3,884                | 182               | 221                    | 41,074           |
| Antalya             | 1,411             | 195           | 245           | 1,158          | 369               | 60                  | 663                 | 818                  | 68                | 24                     | 8,684            |
| Bursa               | 1,757             | 186           | 302           | 948            | 295               | 27                  | 446                 | 621                  | 63                | 26                     | 10,894           |
| Edirne              | 293               | 29            | 61            | 239            | 54                | 3                   | 99                  | 175                  | 5                 | 2                      | 2,403            |

Web-table 3.3: Number of patients included in survival analyses, by continent, country and registry: patients diagnosed during 2010-2014

|                                | Breast<br>(women) | Cervix        | Ovary          | Prostate       | Brain<br>(adults) | Brain<br>(children) | Myeloid<br>(adults) | Lymphoid<br>(adults) | ALL<br>(children) | Lymphoma<br>(children) | Total            |
|--------------------------------|-------------------|---------------|----------------|----------------|-------------------|---------------------|---------------------|----------------------|-------------------|------------------------|------------------|
| Erzurum                        | 325               | 35            | 68             | 311            | 103               | 12                  | 130                 | 294                  | 31                | 16                     | 3,171            |
| Eskisehir                      | 703               | 55            | 114            | 467            | 126               | 6                   | -                   | 8                    | -                 | -                      | 3,780            |
| Izmir                          | 4,855             | 522           | 756            | 3,827          | 1,035             | 95                  | 1,632               | 2,351                | 130               | 67                     | 31,896           |
| Samsun                         | 841               | 71            | 160            | 767            | 237               | 28                  | 261                 | 560                  | 32                | 13                     | 6,238            |
| Trabzon                        | 492               | 52            | 106            | 638            | 177               | 13                  | 233                 | 347                  | 21                | 11                     | 4,301            |
| <b>EUROPE</b>                  | <b>899,534</b>    | <b>81,124</b> | <b>124,041</b> | <b>806,148</b> | <b>97,625</b>     | <b>7,685</b>        | <b>147,697</b>      | <b>397,192</b>       | <b>9,127</b>      | <b>4,315</b>           | <b>4,988,399</b> |
| Austria *                      | 26,179            | 1,886         | 3,499          | 22,220         | 2,499             | -                   | 2,550               | 10,454               | -                 | -                      | 136,521          |
| Belarus (Childhood) †          | -                 | -             | -              | -              | -                 | 193                 | -                   | -                    | 296               | 111                    | 600              |
| Belgium *                      | 53,183            | 3,178         | 4,645          | 41,990         | 4,211             | 400                 | 10,647              | 21,035               | 339               | 250                    | 259,407          |
| Bulgaria *                     | 18,542            | 5,416         | 3,961          | 12,126         | -                 | -                   | 2,276               | 5,294                | 168               | 94                     | 97,707           |
| Croatia *                      | 12,687            | 1,666         | 2,255          | 8,535          | 2,656             | 128                 | 1,699               | 5,520                | 136               | 74                     | 77,589           |
| Czech Republic *               | 33,033            | 4,647         | 6,018          | 34,402         | 4,051             | 167                 | 4,168               | 13,638               | 141               | 83                     | 209,570          |
| Denmark *                      | 23,714            | 1,899         | 2,915          | 21,937         | 3,307             | 162                 | 3,373               | 10,476               | 193               | 95                     | 137,254          |
| Estonia *                      | 2,108             | 539           | 484            | 3,267          | 330               | 22                  | 338                 | 1,071                | 26                | 16                     | 15,731           |
| Finland *                      | 23,158            | 786           | 2,815          | 23,699         | 2,083             | 183                 | 2,216               | 9,545                | 175               | 79                     | 108,011          |
| French registries              | 9,370             | 487           | 933            | 8,900          | 816               | 1,082               | 2,295               | 4,662                | 1,202             | 591                    | 53,501           |
| Bas-Rhin                       | 909               | 33            | 87             | 806            | 74                | -                   | 191                 | 395                  | -                 | -                      | 4,539            |
| Basse Normandie                | -                 | -             | -              | -              | -                 | -                   | 385                 | 601                  | -                 | -                      | 986              |
| Burgundy Digestive             | -                 | -             | -              | -              | -                 | -                   | -                   | -                    | -                 | -                      | 1,291            |
| Calvados                       | 583               | 28            | 58             | 588            | 50                | -                   | -                   | -                    | -                 | -                      | 1,742            |
| Calvados Digestive             | -                 | -             | -              | -              | -                 | -                   | -                   | -                    | -                 | -                      | 780              |
| Côte-d'Or Gynaecologic         | 473               | 22            | 24             | -              | -                 | -                   | -                   | -                    | -                 | -                      | 519              |
| Côte-d'Or Haematopoietic       | -                 | -             | -              | -              | -                 | -                   | 119                 | 235                  | -                 | -                      | 354              |
| Doubs                          | 415               | 22            | 34             | 573            | 41                | -                   | 128                 | 230                  | -                 | -                      | 2,375            |
| Finistère                      | -                 | -             | -              | -              | -                 | -                   | -                   | -                    | -                 | -                      | 1,250            |
| Gironde CNS                    | -                 | -             | -              | -              | 130               | -                   | -                   | -                    | -                 | -                      | 130              |
| Gironde General                | 1,175             | 58            | 102            | 1,020          | -                 | -                   | -                   | -                    | -                 | -                      | 5,066            |
| Gironde Haematopoietic         | -                 | -             | -              | -              | -                 | -                   | 296                 | 591                  | -                 | -                      | 887              |
| Haut-Rhin                      | 608               | 31            | 47             | 662            | 46                | -                   | 148                 | 292                  | -                 | -                      | 3,251            |
| Haute-Vienne                   | -                 | -             | -              | -              | -                 | -                   | -                   | -                    | -                 | -                      | -                |
| Hérault                        | 879               | 76            | 101            | 893            | 71                | -                   | 205                 | 421                  | -                 | -                      | 4,808            |
| Isère                          | 882               | 42            | 87             | 956            | 97                | -                   | 195                 | 484                  | -                 | -                      | 4,791            |
| Lille Metro                    | 661               | 37            | 71             | 510            | 44                | -                   | 121                 | 234                  | -                 | -                      | 3,022            |
| Loire-Atlantique               | 1,606             | 65            | 172            | 1,757          | 139               | -                   | 340                 | 829                  | -                 | -                      | 8,671            |
| Manche                         | 409               | 23            | 63             | 375            | 53                | -                   | -                   | -                    | -                 | -                      | 2,009            |
| Somme                          | 461               | 30            | 49             | 400            | 40                | -                   | 85                  | 194                  | -                 | -                      | 2,288            |
| Tarn                           | 309               | 20            | 38             | 360            | 31                | -                   | 82                  | 156                  | -                 | -                      | 1,867            |
| France Childhood Haem †        | -                 | -             | -              | -              | -                 | -                   | -                   | -                    | 1,202             | 591                    | 1,793            |
| France Childhood Solid †       | -                 | -             | -              | -              | -                 | 1,082               | -                   | -                    | -                 | -                      | 1,082            |
| German registries              | 100,376           | 7,052         | 11,638         | 94,922         | 9,432             | 215                 | 16,802              | 44,420               | 333               | 141                    | 541,801          |
| Brandenburg                    | 9,761             | 796           | 1,138          | 9,765          | 1,076             | -                   | 1,548               | 4,471                | -                 | -                      | 55,005           |
| Bremen                         | 2,267             | 136           | 294            | 1,792          | 190               | 8                   | 348                 | 969                  | 3                 | 3                      | 12,166           |
| Hamburg                        | 6,370             | 463           | 785            | 4,257          | 533               | -                   | 1,142               | 2,870                | -                 | -                      | 30,604           |
| Lower Saxony                   | 27,338            | 1,757         | 3,236          | 26,804         | 2,300             | 95                  | 4,575               | 11,918               | 180               | 90                     | 146,546          |
| Mecklenburg-W. Pomerania       | 6,251             | 462           | 692            | 6,551          | 676               | -                   | 1,231               | 3,507                | -                 | -                      | 37,669           |
| Rhineland Palatinate           | 13,348            | 825           | 1,348          | 11,150         | 1,115             | 73                  | 1,363               | 4,194                | 94                | 31                     | 64,053           |
| Saarland                       | 2,704             | 230           | 329            | 2,070          | 201               | 8                   | 284                 | 1,024                | 11                | 1                      | 13,825           |
| Saxony                         | 16,143            | 1,210         | 2,005          | 16,867         | 1,856             | -                   | 3,748               | 8,341                | -                 | -                      | 95,767           |
| Schleswig-Holstein             | 7,906             | 455           | 828            | 7,241          | 643               | 31                  | 972                 | 3,111                | 45                | 16                     | 38,435           |
| Thuringia                      | 8,288             | 718           | 983            | 8,425          | 842               | -                   | 1,591               | 4,015                | -                 | -                      | 47,731           |
| Gibraltar *                    | 4                 | -             | -              | 3              | -                 | -                   | -                   | -                    | -                 | -                      | 15               |
| Greece (National Paediatric) † | -                 | -             | -              | -              | -                 | 237                 | -                   | -                    | 399               | 132                    | 768              |
| Iceland *                      | 1,013             | 76            | 86             | 1,033          | 114               | 10                  | 170                 | 422                  | 13                | 7                      | 5,282            |
| Ireland *                      | 11,479            | 1,200         | 1,517          | 13,531         | 1,533             | 131                 | 1,994               | 5,507                | 151               | 58                     | 66,104           |
| Italian registries             | 46,565            | 2,340         | 5,411          | 33,718         | 5,426             | 320                 | 10,149              | 21,779               | 402               | 223                    | 251,283          |
| Alto Adige                     | 340               | 14            | 40             | 297            | 41                | 1                   | 56                  | 149                  | 7                 | 1                      | 1,924            |
| Barletta-Andria-Trani          | 705               | 51            | 95             | 503            | 88                | 7                   | 291                 | 378                  | 17                | 6                      | 4,047            |
| Basilicata                     | 349               | 23            | 48             | 349            | 57                | 3                   | 149                 | 233                  | -                 | 2                      | 2,340            |
| Bergamo                        | 2,603             | 156           | 323            | 2,239          | 306               | 15                  | 413                 | 1,306                | 25                | 15                     | 15,076           |
| Biella-Vercelli                | 338               | 24            | 39             | 293            | 39                | -                   | 105                 | 161                  | -                 | -                      | 1,936            |
| Brescia                        | -                 | -             | -              | -              | -                 | -                   | -                   | -                    | -                 | -                      | -                |
| Brindisi                       | -                 | -             | -              | -              | -                 | -                   | -                   | -                    | -                 | -                      | -                |
| Caserta                        | 499               | 25            | 73             | 320            | 81                | 9                   | 131                 | 215                  | 6                 | 5                      | 2,827            |
| Catania-Messina-Enna           | 4,006             | 230           | 442            | 2,585          | 387               | 16                  | 927                 | 1,914                | 40                | 14                     | 20,274           |
| Catanzaro                      | -                 | -             | -              | -              | -                 | -                   | -                   | -                    | -                 | -                      | -                |
| Como                           | 1,037             | 56            | 109            | 679            | 121               | 11                  | 180                 | 465                  | 9                 | 4                      | 5,263            |
| Cremona                        | 366               | 19            | 30             | 221            | 50                | 2                   | 75                  | 111                  | -                 | -                      | 1,822            |
| Ferrara                        | 816               | 36            | 86             | 603            | 82                | 5                   | 162                 | 340                  | -                 | 4                      | 4,304            |
| Friuli-Venezia-Giulia          | 1,336             | 62            | 125            | 984            | 113               | 6                   | 90                  | 478                  | 7                 | 4                      | 6,567            |
| Genoa                          | -                 | -             | -              | -              | -                 | -                   | -                   | -                    | -                 | -                      | -                |
| Latina                         | 653               | 35            | 84             | 435            | 86                | 3                   | 204                 | 337                  | 7                 | 4                      | 4,015            |
| Lecce                          | -                 | -             | -              | -              | -                 | -                   | -                   | -                    | -                 | -                      | -                |
| Mantova                        | 399               | 16            | 43             | 213            | 27                | 1                   | 47                  | 190                  | 2                 | 2                      | 1,936            |
| Milano                         | 3,255             | 132           | 367            | 2,019          | 300               | 15                  | 724                 | 1,266                | 23                | 11                     | 16,685           |
| Modena                         | 1,907             | 111           | 218            | 1,323          | 222               | 7                   | 333                 | 902                  | 16                | 8                      | 9,789            |
| Monza-Brianza                  | 2,169             | 95            | 231            | 1,489          | 268               | 15                  | 446                 | 893                  | 17                | 9                      | 11,244           |
| Naples                         | 2,001             | 119           | 261            | 1,354          | 269               | 30                  | 463                 | 1,005                | 28                | 16                     | 11,813           |
| Nuoro                          | 476               | 16            | 47             | 311            | 63                | 2                   | 146                 | 279                  | 3                 | 7                      | 2,632            |
| Palermo                        | 2,351             | 113           | 296            | 1,593          | 306               | 23                  | 500                 | 1,233                | 24                | 13                     | 12,971           |
| Parma                          | 2,028             | 81            | 273            | 1,487          | 260               | 9                   | 573                 | 1,100                | 16                | 9                      | 11,953           |
| Pavia                          | -                 | -             | -              | -              | -                 | -                   | -                   | -                    | -                 | -                      | -                |
| Piacenza                       | 546               | 16            | 57             | 325            | 66                | 4                   | 163                 | 289                  | 4                 | 2                      | 3,037            |
| Ragusa                         | 1,085             | 62            | 147            | 648            | 126               | 12                  | 250                 | 483                  | 7                 | 5                      | 5,725            |
| Reggio Emilia                  | 1,427             | 46            | 139            | 849            | 169               | 7                   | 323                 | 693                  | 9                 | 10                     | 6,923            |
| Romagna                        | 3,660             | 170           | 375            | 2,945          | 497               | 18                  | 1,049               | 1,765                | 22                | 20                     | 20,244           |
| Salerno                        | -                 | -             | -              | -              | -                 | -                   | -                   | -                    | -                 | -                      | -                |
| Sassari                        | 812               | 39            | 82             | 463            | 71                | 3                   | 122                 | 388                  | 5                 | 3                      | 3,818            |

Web-table 3.3: Number of patients included in survival analyses, by continent, country and registry: patients diagnosed during 2010-2014

|                              | Breast<br>(women) | Cervix         | Ovary          | Prostate         | Brain<br>(adults) | Brain<br>(children) | Myeloid<br>(adults) | Lymphoid<br>(adults) | ALL<br>(children) | Lymphoma<br>(children) | Total             |
|------------------------------|-------------------|----------------|----------------|------------------|-------------------|---------------------|---------------------|----------------------|-------------------|------------------------|-------------------|
| Siracusa                     | 779               | 48             | 103            | 632              | 114               | 5                   | 129                 | 308                  | 4                 | 1                      | 4,166             |
| Sondrio                      | 290               | 21             | 38             | 276              | 31                | 3                   | 30                  | 138                  | 4                 | 1                      | 1,776             |
| Taranto                      | 1,280             | 56             | 160            | 784              | 172               | 8                   | 273                 | 552                  | 9                 | 4                      | 6,398             |
| Trapani                      | 287               | 17             | 43             | 191              | 36                | 1                   | 81                  | 123                  | 2                 | 3                      | 1,511             |
| Trento                       | 400               | 21             | 38             | 243              | 41                | 5                   | 60                  | 177                  | 8                 | 1                      | 2,032             |
| Turin                        | 2,649             | 143            | 297            | 2,007            | 283               | -                   | 467                 | 1,258                | -                 | -                      | 13,668            |
| Tuscany                      | -                 | -              | -              | -                | -                 | -                   | -                   | -                    | -                 | -                      | -                 |
| Umbria                       | 3,072             | 174            | 407            | 2,738            | 376               | 12                  | 861                 | 1,477                | 15                | 9                      | 18,467            |
| Varese                       | 2,392             | 106            | 261            | 2,123            | 252               | 13                  | 233                 | 1,040                | 17                | 12                     | 12,447            |
| Veneto                       | -                 | -              | -              | -                | -                 | -                   | -                   | -                    | -                 | -                      | -                 |
| Viterbo                      | 252               | 7              | 34             | 197              | 26                | 1                   | 93                  | 133                  | -                 | -                      | 1,538             |
| Piedmont Childhood           | -                 | -              | -              | -                | -                 | 48                  | -                   | -                    | 49                | 18                     | 115               |
| Latvia *                     | 4,910             | 1,181          | 1,290          | 4,265            | 495               | 43                  | 646                 | 1,191                | 52                | -                      | 26,457            |
| Lithuania *                  | 4,317             | 1,359          | 1,221          | 7,521            | 698               | 27                  | 1,586               | 2,411                | 59                | 16                     | 33,241            |
| Malta *                      | 1,217             | 43             | 158            | 798              | 108               | 8                   | 216                 | 529                  | 3                 | 4                      | 5,602             |
| Netherlands *                | 71,969            | 3,584          | 6,616          | 54,349           | 6,186             | 489                 | 11,624              | 29,084               | 461               | 240                    | 372,905           |
| Norway *                     | 15,545            | 1,544          | 2,425          | 22,899           | 2,061             | 135                 | 3,308               | 9,274                | 163               | 96                     | 105,008           |
| Poland *                     | 83,648            | 14,602         | 18,609         | 57,063           | 13,155            | 600                 | 7,245               | 34,277               | 789               | 364                    | 497,470           |
| Greater Poland               | 8,153             | 1,114          | 1,742          | 4,981            | 1,207             | 83                  | 651                 | 3,115                | 101               | 48                     | 45,995            |
| Holy Cross                   | 2,369             | 443            | 643            | 2,003            | 447               | 16                  | 422                 | 1,401                | 32                | 14                     | 17,254            |
| Kuiavia-Pomerania            | 4,954             | 790            | 1,166          | 2,976            | 774               | 42                  | 412                 | 1,916                | 43                | 23                     | 29,785            |
| Lesser Poland                | 6,666             | 1,196          | 1,652          | 4,874            | 914               | 51                  | 485                 | 2,812                | 84                | 47                     | 40,319            |
| Łódź                         | 6,559             | 1,001          | 1,478          | 3,682            | 1,047             | 41                  | 766                 | 3,286                | 6                 | 7                      | 36,669            |
| Lower Silesia                | 6,922             | 1,250          | 1,435          | 3,922            | 1,212             | 37                  | 560                 | 2,543                | -                 | 24                     | 41,161            |
| Lublin                       | 4,289             | 776            | 1,097          | 3,500            | 768               | 40                  | 411                 | 2,139                | 58                | 18                     | 27,214            |
| Lubush                       | 2,197             | 450            | 467            | 1,674            | 341               | 15                  | 198                 | 735                  | 26                | 8                      | 12,993            |
| Mazovia                      | 11,496            | 1,881          | 2,144          | 7,355            | 1,810             | 64                  | 556                 | 3,644                | 99                | 48                     | 60,377            |
| Opole                        | 2,064             | 404            | 469            | 1,305            | 315               | 23                  | 223                 | 799                  | 17                | 10                     | 12,929            |
| Podlahaia                    | 2,224             | 489            | 543            | 1,783            | 386               | 16                  | 151                 | 813                  | 37                | 6                      | 13,367            |
| Pomerania                    | 5,405             | 1,096          | 1,109          | 4,660            | 614               | 30                  | 453                 | 2,363                | 80                | 39                     | 33,670            |
| Silesia                      | 9,848             | 1,792          | 2,255          | 7,110            | 1,614             | 47                  | 947                 | 4,002                | 83                | 23                     | 60,598            |
| Subcarpathia                 | 3,554             | 663            | 1,045          | 3,304            | 751               | 45                  | 535                 | 2,369                | 56                | 19                     | 25,280            |
| Varmia-Mazuria               | 2,908             | 621            | 712            | 1,868            | 514               | 31                  | 263                 | 1,144                | 30                | 11                     | 18,811            |
| West Pomerania               | 4,040             | 636            | 652            | 2,066            | 441               | 19                  | 212                 | 1,196                | 37                | 19                     | 21,048            |
| Portugal *                   | 20,091            | 2,114          | 1,617          | 16,987           | 2,038             | 159                 | 2,683               | 9,351                | 150               | 106                    | 105,482           |
| Azores                       | 538               | 71             | 69             | 552              | 65                | 3                   | 143                 | 293                  | 5                 | 3                      | 3,403             |
| Portugal Central             | 1,265             | 132            | 83             | 1,266            | 136               | 6                   | 135                 | 488                  | 4                 | 4                      | 6,491             |
| Portugal North               | 1,918             | 205            | 140            | 1,753            | 211               | 10                  | 261                 | 839                  | 24                | 19                     | 10,968            |
| Portugal South               | 16,370            | 1,706          | 1,325          | 13,416           | 1,626             | 140                 | 2,144               | 7,731                | 117               | 80                     | 84,620            |
| Romania (Cluj)               | 971               | 467            | 204            | 540              | 156               | 10                  | 236                 | 441                  | 13                | 7                      | 6,525             |
| Russian registries ‡         | 17,134            | 4,507          | 3,870          | 10,783           | 1,791             | 141                 | 1,102               | 3,622                | 113               | 71                     | 96,805            |
| Arkhangelsk                  | 2,307             | 753            | 620            | 1,307            | 400               | 27                  | 197                 | 855                  | 31                | 16                     | 17,289            |
| Karelia                      | 1,487             | 629            | 343            | 654              | 182               | 11                  | 171                 | 319                  | -                 | 8                      | 9,182             |
| Omsk                         | 3,508             | 785            | 693            | 2,116            | 248               | 28                  | -                   | -                    | -                 | -                      | 15,574            |
| Samara                       | 7,845             | 1,622          | 1,735          | 5,420            | 776               | 63                  | 734                 | 2,448                | 82                | 47                     | 44,299            |
| Tomsk                        | 1,987             | 718            | 479            | 1,286            | 185               | 12                  | -                   | -                    | -                 | -                      | 10,461            |
| Slovakia *                   | 2,666             | 590            | 544            | 2,027            | 423               | 39                  | 610                 | 1,444                | 26                | 14                     | 17,890            |
| Slovenia *                   | 4,971             | 524            | 768            | 5,784            | 588               | 31                  | 994                 | 2,456                | 30                | 23                     | 33,482            |
| Spanish registries           | 13,949            | 1,017          | 1,700          | 15,336           | 2,109             | 484                 | 3,370               | 7,331                | 603               | 330                    | 92,098            |
| Basque Country               | 5,866             | 343            | 750            | 6,596            | 894               | 39                  | 1,566               | 3,215                | 38                | 24                     | 40,306            |
| Canaries                     | 1,806             | 175            | 219            | 1,759            | 283               | 9                   | 335                 | 986                  | 12                | 9                      | 10,826            |
| Girona                       | 1,728             | 88             | 179            | 1,740            | 246               | 14                  | 472                 | 879                  | 19                | 13                     | 10,678            |
| Granada                      | 1,319             | 110            | 161            | 1,428            | 206               | 19                  | 259                 | 605                  | 20                | 11                     | 8,337             |
| Mallorca                     | 1,299             | 142            | 151            | 1,625            | 171               | 13                  | 309                 | 656                  | 15                | 4                      | 8,383             |
| Murcia                       | 651               | 72             | 84             | 780              | 114               | 12                  | 159                 | 396                  | 6                 | 9                      | 4,434             |
| Navarra                      | 360               | 14             | 53             | 401              | 72                | 3                   | 65                  | 170                  | 3                 | -                      | 2,383             |
| Tarragona                    | 920               | 73             | 103            | 1,007            | 123               | 6                   | 205                 | 424                  | 9                 | 9                      | 5,650             |
| Spain Childhood              | -                 | -              | -              | -                | -                 | 297                 | -                   | -                    | 405               | 201                    | 903               |
| Valencia Childhood           | -                 | -              | -              | -                | -                 | 72                  | -                   | -                    | 76                | 50                     | 198               |
| Sweden *                     | 36,967            | 2,352          | 3,879          | 49,394           | 3,559             | 278                 | 6,350               | 15,926               | 342               | 110                    | 199,562           |
| Swiss registries             | 13,090            | 563            | 1,587          | 13,069           | 1,433             | 201                 | 2,480               | 6,258                | 277               | 98                     | 71,271            |
| Basel                        | 386               | 16             | 34             | 370              | 38                | -                   | 18                  | 140                  | -                 | -                      | 1,742             |
| Fribourg                     | 1,025             | 29             | 97             | 1,110            | 106               | -                   | 183                 | 452                  | -                 | -                      | 5,274             |
| Geneva                       | 1,502             | 43             | 175            | 1,178            | 140               | -                   | 307                 | 673                  | -                 | -                      | 7,403             |
| Graubünden-Glarus            | 820               | 50             | 110            | 1,100            | 104               | -                   | 177                 | 437                  | -                 | -                      | 5,027             |
| Neuchâtel                    | 685               | 25             | 87             | 512              | 52                | -                   | 116                 | 314                  | -                 | -                      | 3,580             |
| St Gallen-Appenzell          | 1,835             | 112            | 250            | 2,122            | 220               | -                   | 354                 | 880                  | -                 | -                      | 10,570            |
| Ticino                       | 1,593             | 63             | 205            | 1,108            | 142               | -                   | 291                 | 786                  | -                 | -                      | 8,324             |
| Valais                       | 1,238             | 40             | 151            | 1,541            | 137               | -                   | 295                 | 645                  | -                 | -                      | 7,117             |
| Zürich                       | 4,006             | 185            | 478            | 4,028            | 494               | -                   | 739                 | 1,931                | -                 | -                      | 21,658            |
| Switzerland Childhood †      | -                 | -              | -              | -                | -                 | 201                 | -                   | -                    | 277               | 98                     | 576               |
| United Kingdom *             | 246,678           | 15,505         | 33,376         | 225,050          | 26,367            | 1,790               | 46,570              | 119,774              | 2,072             | 882                    | 1,363,457         |
| England                      | 206,093           | 12,625         | 27,570         | 191,306          | 21,863            | 1,504               | 39,167              | 100,976              | 1,769             | 768                    | 1,130,928         |
| Northern Ireland             | 6,147             | 474            | 890            | 5,246            | 710               | 58                  | 1,514               | 2,957                | 67                | 24                     | 35,310            |
| Scotland                     | 21,590            | 1,654          | 3,043          | 15,964           | 2,279             | 143                 | 4,541               | 9,862                | 153               | 52                     | 124,655           |
| Wales                        | 12,848            | 752            | 1,873          | 12,534           | 1,515             | 85                  | 1,348               | 5,979                | 83                | 38                     | 72,564            |
| <b>OCEANIA</b>               | <b>80,597</b>     | <b>4,376</b>   | <b>8,614</b>   | <b>99,752</b>    | <b>8,589</b>      | <b>550</b>          | <b>19,213</b>       | <b>45,005</b>        | <b>1,004</b>      | <b>455</b>             | <b>506,495</b>    |
| Australia *                  | 65,862            | 3,570          | 6,962          | 84,650           | 7,184             | 482                 | 16,512              | 37,707               | 848               | 353                    | 419,302           |
| Australian Capital Territory | 1,004             | 34             | 97             | 1,072            | 76                | 9                   | 164                 | 448                  | 10                | 6                      | 5,052             |
| New South Wales              | 14,231            | 774            | 1,587          | 21,152           | 1,420             | 82                  | 3,667               | 8,158                | 183               | 78                     | 97,072            |
| Northern Territory           | 390               | 45             | 33             | 369              | 30                | 4                   | 87                  | 163                  | 7                 | 8                      | 2,259             |
| Queensland                   | 16,545            | 1,042          | 1,769          | 20,954           | 1,993             | 173                 | 4,240               | 9,125                | 223               | 82                     | 108,923           |
| South Australia              | 4,915             | 229            | 524            | 6,480            | 502               | 20                  | 1,168               | 3,206                | 49                | 21                     | 30,879            |
| Tasmania                     | 1,520             | 83             | 172            | 1,901            | 192               | 9                   | 278                 | 921                  | 10                | 7                      | 10,158            |
| Victoria                     | 19,489            | 922            | 2,128          | 22,594           | 2,167             | 130                 | 5,356               | 11,369               | 280               | 99                     | 117,909           |
| Western Australia            | 7,768             | 441            | 652            | 10,128           | 804               | 55                  | 1,552               | 4,317                | 86                | 52                     | 47,050            |
| New Zealand *                | 14,735            | 806            | 1,652          | 15,102           | 1,405             | 68                  | 2,701               | 7,298                | 156               | 102                    | 87,193            |
| <b>Total</b>                 | <b>2,123,013</b>  | <b>203,276</b> | <b>272,677</b> | <b>1,860,436</b> | <b>221,194</b>    | <b>21,736</b>       | <b>402,701</b>      | <b>1,005,008</b>     | <b>29,582</b>     | <b>13,592</b>          | <b>12,355,369</b> |

**Web-table 4: Age-standardised five-year net survival (%): adults (15-99 years) diagnosed with one of 15 common malignancies and children (0-14 years) diagnosed with one of three common malignancies, by continent, country, registry and calendar period of diagnosis (2000-2004, 2005-2009, 2010-2014)**

**Web-table 4.1** Oesophagus

Stomach  
Colon  
Rectum  
Liver  
Pancreas

**Web-table 4.2** Lung

Melanoma of the skin  
Breast  
Cervix  
Ovary  
Prostate

**Web-table 4.3** Brain (adults)

Brain (children)  
Myeloid malignancies (adults)  
Lymphoid malignancies (adults)  
Acute lymphoblastic leukaemia (children)  
Lymphomas (children)

Survival estimates that are not age-standardised are italicised.

\* Data with 100% coverage of the national population.

† Data with 100% coverage of the national population for childhood malignancies only.

‡ **Asia: Korea:** Republic of Korea; **Europe: France, Burgundy (digestive):** data for Côte-d'Or and Saône-et-Loire *départements*; **Italy, Biella:** coverage now includes Provincia di Vercelli as well as Provincia di Biella; **Milano:** coverage now includes Provincia di Milano and Lodi as well as Milan; **Naples:** coverage now includes all of the *Azienda Sanitaria Locale* Napoli 3 Sud and the municipalities of Acerra and Casalnuovo; **Romania, Cluj:** coverage now includes Bistrița-Năsăud county as well as Cluj county. **Poland, Holy Cross** (formerly Kielce), **Lower Silesia** (formerly Wrocław), **Subcarpathia** (formerly Podkarpackie); **Russia:** Russian Federation; **Spain Childhood:** data are for the province of Barcelona.

§ Survival estimate considered less reliable because 15% or more of patients were (a) lost to follow-up or censored alive within five years of diagnosis or, if diagnosed in 2010 or later, before 31 December 2014; **or** (b) registered only from a death certificate or at autopsy; **or** (c) registered with incomplete dates, i.e., unknown year of birth, unknown month and/or year of diagnosis, or unknown year of last vital status.

**Web-table 4.1: Age-standardised five-year net survival (NS, %): adults (15-99 years) diagnosed with cancer of the oesophagus, stomach, colon, rectum, liver or pancreas, by continent, country, registry and calendar period of diagnosis (2000-2004, 2005-2009, 2010-2014)**

[Back](#)

|                                    | Period of diagnosis | Oesophagus    |             | Stomach       |             | Colon         |              | Rectum        |             | Liver         |              | Pancreas      |             |
|------------------------------------|---------------------|---------------|-------------|---------------|-------------|---------------|--------------|---------------|-------------|---------------|--------------|---------------|-------------|
|                                    |                     | NS (%)        | 95% CI      | NS (%)        | 95% CI      | NS (%)        | 95% CI       | NS (%)        | 95% CI      | NS (%)        | 95% CI       | NS (%)        | 95% CI      |
| <b>AFRICA</b>                      |                     |               |             |               |             |               |              |               |             |               |              |               |             |
| <b>Algeria</b><br>(3 registries)   | 2000-2004           |               | -           | <b>20.7</b> § | 14.3 - 27.1 | <b>88.1</b> § | 80.1 - 96.0  | <b>63.4</b> § | 48.3 - 78.5 | 6.2 §         | 0.0 - 13.7   | 8.3 §         | 0.0 - 20.3  |
|                                    | 2005-2009           | <b>55.4</b> § | 36.4 - 74.5 | <b>42.4</b> § | 36.4 - 48.4 | <b>76.7</b> § | 69.6 - 83.9  | <b>64.5</b> § | 56.4 - 72.7 | <b>13.9</b> § | 8.6 - 19.2   | <b>30.2</b> § | 21.3 - 39.2 |
|                                    | 2010-2014           | <b>37.3</b> § | 23.4 - 51.1 | <b>41.6</b> § | 35.5 - 47.7 | <b>74.2</b> § | 65.7 - 82.7  | <b>67.3</b> § | 58.0 - 76.5 | <b>13.5</b> § | 6.9 - 20.1   | <b>29.8</b> § | 18.7 - 40.9 |
| Annaba                             | 2000-2004           |               | -           | 49.3 §        | 13.8 - 84.8 | 78.8 §        | 40.9 - 100.0 | 46.1 §        | 0.2 - 92.0  | 91.4 §        | 73.5 - 100.0 | 76.9 §        | 56.0 - 97.8 |
|                                    | 2005-2009           |               | -           |               | -           | <b>66.6</b> § | 47.7 - 85.6  |               | -           | 13.6 §        | 0.0 - 31.5   | 18.4 §        | 0.0 - 41.7  |
|                                    | 2010-2014           |               | -           | 75.3 §        | 53.9 - 96.7 | <b>74.0</b> § | 57.3 - 90.8  | 35.4 §        | 0.0 - 72.2  | 47.0 §        | 16.2 - 77.8  | 22.2 §        | 0.0 - 49.8  |
| Sétif                              | 2000-2004           |               | -           | <b>19.9</b> § | 13.8 - 26.0 | <b>87.0</b> § | 78.1 - 95.8  | <b>58.7</b> § | 43.9 - 73.6 | 3.2 §         | 0.0 - 8.3    | 0.1 §         | 0.0 - 0.2   |
|                                    | 2005-2009           |               | -           | <b>16.5</b> § | 11.4 - 21.6 | <b>76.1</b> § | 66.7 - 85.5  | <b>58.6</b> § | 49.1 - 68.1 | <b>0.1</b> §  | 0.0 - 0.3    |               | -           |
|                                    | 2010-2014           | 0.1 §         | 0.0 - 0.3   | <b>10.7</b> § | 5.4 - 16.0  | <b>62.2</b> § | 46.1 - 78.3  | <b>30.5</b> § | 22.9 - 38.2 | 0.0 §         | 0.0 - 0.1    |               | -           |
| Tlemcen                            | 2000-2004           |               | -           |               | -           |               | -            |               | -           |               | -            |               | -           |
|                                    | 2005-2009           | 64.2 §        | 43.7 - 84.8 | <b>59.5</b> § | 51.1 - 68.0 | <b>72.2</b> § | 62.6 - 81.9  | <b>70.0</b> § | 58.5 - 81.5 | 38.0 §        | 18.9 - 57.2  | 62.0 §        | 45.5 - 78.6 |
|                                    | 2010-2014           | 55.5 §        | 27.2 - 83.8 | <b>62.3</b> § | 53.3 - 71.3 | <b>65.6</b> § | 52.5 - 78.7  | <b>84.2</b> § | 71.0 - 97.3 | 44.3 §        | 19.2 - 69.5  | 22.5 §        | 0.0 - 46.8  |
| <b>Mali (Bamako)</b>               | 2000-2004           |               | -           |               | -           |               | -            |               | -           |               | -            |               | -           |
|                                    | 2005-2009           |               | -           |               | -           |               | -            |               | -           |               | -            |               | -           |
|                                    | 2010-2014           |               | -           |               | -           |               | -            |               | -           |               | -            |               | -           |
| <b>Mauritius *</b>                 | 2000-2004           |               | -           |               | -           |               | -            |               | -           |               | -            |               | -           |
|                                    | 2005-2009           |               | -           | <b>44.3</b>   | 36.8 - 51.7 | <b>65.9</b>   | 56.7 - 75.1  | <b>83.6</b> § | 75.0 - 92.1 |               | -            |               | -           |
|                                    | 2010-2014           | 28.1          | 14.6 - 41.5 | <b>25.7</b>   | 18.0 - 33.3 | <b>57.9</b>   | 48.5 - 67.2  | <b>72.9</b> § | 62.7 - 83.0 | 17.0          | 2.6 - 31.3   | 24.5          | 11.4 - 37.6 |
| <b>Morocco (Casablanca)</b>        | 2000-2004           |               | -           |               | -           |               | -            |               | -           |               | -            |               | -           |
|                                    | 2005-2009           |               | -           |               | -           |               | -            |               | -           |               | -            |               | -           |
|                                    | 2010-2014           |               | -           |               | -           |               | -            |               | -           |               | -            |               | -           |
| <b>Nigeria (Ibadan)</b>            | 2000-2004           |               | -           |               | -           |               | -            |               | -           |               | -            |               | -           |
|                                    | 2005-2009           |               | -           |               | -           | 41.2 §        | 16.9 - 65.6  | 25.9 §        | 0.0 - 53.7  |               | -            |               | -           |
|                                    | 2010-2014           |               | -           |               | -           | 17.4 §        | 0.1 - 34.8   | 16.9 §        | 0.0 - 37.8  |               | -            |               | -           |
| <b>South Africa (Eastern Cape)</b> | 2000-2004           | 12.1 §        | 0.0 - 27.0  |               | -           |               | -            |               | -           | 27.1 §        | 0.0 - 57.1   |               | -           |
|                                    | 2005-2009           | <b>19.2</b> § | 12.0 - 26.4 | 25.0 §        | 6.1 - 44.0  | 31.9 §        | 10.7 - 53.1  | 19.9 §        | 0.0 - 46.4  |               | -            |               | -           |
|                                    | 2010-2014           | <b>18.0</b> § | 12.6 - 23.4 | 25.6 §        | 7.2 - 43.9  | <b>12.3</b> § | 4.3 - 20.2   | 9.1 §         | 0.0 - 21.5  | 0.0 §         | 0.0 - 0.0    | 21.8 §        | 0.0 - 49.5  |
| <b>AMERICA (CENTRAL AND SOUTH)</b> |                     |               |             |               |             |               |              |               |             |               |              |               |             |
| <b>Argentina</b><br>(5 registries) | 2000-2004           | <b>18.7</b> § | 12.7 - 24.8 | <b>21.7</b> § | 17.1 - 26.2 | <b>54.2</b> § | 49.7 - 58.7  | <b>48.9</b>   | 41.5 - 56.3 | <b>14.1</b> § | 6.0 - 22.1   | <b>9.6</b> §  | 5.5 - 13.6  |
|                                    | 2005-2009           | <b>15.0</b> § | 11.4 - 18.6 | <b>19.3</b> § | 16.9 - 21.7 | <b>51.2</b> § | 49.0 - 53.5  | <b>47.5</b>   | 43.3 - 51.7 | <b>11.4</b> § | 8.2 - 14.5   | <b>8.3</b> §  | 6.0 - 10.7  |
|                                    | 2010-2014           | <b>16.4</b> § | 11.9 - 21.0 | <b>21.5</b> § | 18.5 - 24.4 | <b>54.4</b> § | 51.8 - 57.1  | <b>49.9</b>   | 45.3 - 54.4 | <b>12.6</b> § | 8.7 - 16.6   | <b>11.4</b> § | 8.1 - 14.6  |
| Chubut                             | 2000-2004           |               | -           |               | -           |               | -            |               | -           |               | -            |               | -           |
|                                    | 2005-2009           |               | -           | 0.3 §         | 0.0 - 0.9   | <b>62.9</b> § | 53.1 - 72.6  | 5.9 §         | 0.0 - 15.9  | 0.2 §         | 0.0 - 0.5    | 0.1 §         | 0.0 - 0.3   |
|                                    | 2010-2014           |               | -           | 2.9 §         | 0.0 - 6.2   | <b>79.4</b> § | 71.9 - 86.8  | 3.5 §         | 0.0 - 9.0   | 0.0 §         | 0.0 - 0.0    | 0.0 §         | 0.0 - 0.0   |
| Córdoba                            | 2000-2004           | 14.2 §        | 4.6 - 23.7  | <b>15.1</b> § | 8.3 - 21.9  | <b>44.4</b> § | 36.8 - 52.0  | <b>51.2</b>   | 37.8 - 64.6 | 2.9 §         | 0.0 - 7.7    | <b>3.3</b> §  | 0.0 - 6.7   |
|                                    | 2005-2009           | <b>18.7</b> § | 12.8 - 24.5 | <b>19.3</b> § | 15.5 - 23.1 | <b>54.1</b> § | 50.6 - 57.5  | <b>45.1</b>   | 39.1 - 51.1 | <b>10.2</b> § | 5.9 - 14.5   | <b>4.8</b> §  | 2.8 - 6.8   |
|                                    | 2010-2014           | <b>14.2</b> § | 5.7 - 22.8  | <b>25.3</b> § | 19.3 - 31.3 | <b>55.0</b> § | 50.4 - 59.6  | <b>42.7</b>   | 35.6 - 49.8 | <b>13.1</b> § | 6.9 - 19.3   | <b>3.3</b> §  | 0.6 - 6.0   |
| Mendoza                            | 2000-2004           | <b>20.2</b> § | 12.9 - 27.5 | <b>23.8</b> § | 18.4 - 29.2 | <b>57.7</b> § | 52.3 - 63.2  | <b>47.0</b>   | 38.4 - 55.6 | 20.0 §        | 8.5 - 31.5   | <b>13.0</b> § | 7.2 - 18.7  |
|                                    | 2005-2009           | <b>10.5</b> § | 7.0 - 14.0  | <b>18.9</b> § | 15.8 - 22.1 | <b>47.7</b> § | 44.6 - 50.8  | <b>49.0</b>   | 43.3 - 54.8 | <b>11.2</b> § | 7.4 - 15.0   | <b>11.2</b> § | 7.2 - 15.1  |
|                                    | 2010-2014           | <b>14.1</b> § | 9.0 - 19.3  | <b>18.2</b> § | 14.7 - 21.7 | <b>50.9</b> § | 47.3 - 54.5  | <b>52.5</b>   | 46.4 - 58.7 | <b>8.5</b> §  | 4.8 - 12.2   | <b>13.2</b> § | 8.6 - 17.8  |
| Tierra del Fuego                   | 2000-2004           |               | -           |               | -           |               | -            |               | -           |               | -            |               | -           |
|                                    | 2005-2009           |               | -           | 34.2 §        | 18.7 - 49.7 | 40.9 §        | 28.4 - 53.5  |               | -           |               | -            |               | -           |
|                                    | 2010-2014           |               | -           | 27.3 §        | 11.0 - 43.6 | <b>51.5</b> § | 37.1 - 65.9  |               | -           |               | -            |               | -           |
| Argentina Childhood †              | 2000-2004           |               | -           |               | -           |               | -            |               | -           |               | -            |               | -           |
|                                    | 2005-2009           |               | -           |               | -           |               | -            |               | -           |               | -            |               | -           |
|                                    | 2010-2014           |               | -           |               | -           |               | -            |               | -           |               | -            |               | -           |
| <b>Brazil</b><br>(6 registries)    | 2000-2004           | <b>10.7</b> § | 9.0 - 12.4  | <b>19.1</b> § | 17.9 - 20.3 | <b>44.5</b> § | 42.9 - 46.0  | <b>37.7</b> § | 35.7 - 39.6 | <b>15.4</b> § | 10.4 - 20.5  | <b>3.9</b> §  | 3.0 - 4.9   |
|                                    | 2005-2009           | <b>12.5</b> § | 10.6 - 14.5 | <b>24.7</b> § | 23.2 - 26.2 | <b>50.6</b> § | 49.3 - 52.0  | <b>45.7</b> § | 43.7 - 47.8 | <b>9.6</b> §  | 6.5 - 12.8   | <b>9.1</b> §  | 7.3 - 10.9  |
|                                    | 2010-2014           | <b>9.7</b> §  | 7.9 - 11.4  | <b>20.6</b> § | 18.9 - 22.2 | <b>48.3</b> § | 46.7 - 49.9  | <b>42.4</b> § | 40.1 - 44.6 | <b>11.2</b> § | 7.6 - 14.7   | <b>9.5</b> §  | 7.4 - 11.5  |
| Aracaju                            | 2000-2004           | 26.9 §        | 7.0 - 46.8  | <b>26.6</b>   | 19.6 - 33.6 | <b>64.6</b>   | 53.0 - 76.2  | <b>37.9</b>   | 26.2 - 49.6 | <b>20.0</b> § | 11.1 - 28.9  | 23.4 §        | 10.9 - 35.9 |
|                                    | 2005-2009           | 14.5          | 3.3 - 25.7  | <b>34.5</b>   | 25.5 - 43.5 | <b>59.2</b>   | 50.2 - 68.1  | <b>45.1</b>   | 34.5 - 55.6 | 22.3 §        | 9.0 - 35.7   | 13.7 §        | 4.5 - 22.9  |
|                                    | 2010-2014           | <b>11.7</b>   | 4.9 - 18.4  | <b>40.1</b>   | 28.5 - 51.7 | <b>67.0</b>   | 56.6 - 77.5  | <b>43.9</b>   | 30.9 - 56.9 | 29.2 §        | 13.5 - 44.9  | <b>20.2</b> § | 8.5 - 32.0  |
| Cuiabá                             | 2000-2004           |               | -           |               | -           |               | -            |               | -           |               | -            |               | -           |
|                                    | 2005-2009           |               | -           |               | -           |               | -            |               | -           |               | -            |               | -           |
|                                    | 2010-2014           |               | -           |               | -           |               | -            |               | -           |               | -            |               | -           |
| Curitiba                           | 2000-2004           | <b>23.9</b> § | 18.1 - 29.7 | <b>30.0</b> § | 26.1 - 34.0 | <b>54.4</b> § | 50.0 - 58.8  | <b>46.5</b>   | 39.7 - 53.3 | <b>20.5</b> § | 12.8 - 28.2  | <b>11.6</b> § | 7.3 - 16.0  |
|                                    | 2005-2009           | <b>10.2</b> § | 6.9 - 13.4  | <b>25.9</b> § | 22.6 - 29.3 | <b>53.8</b>   | 50.3 - 57.4  | <b>53.9</b>   | 48.8 - 59.1 | <b>11.3</b> § | 7.4 - 15.3   | <b>10.1</b> § | 6.5 - 13.6  |
|                                    | 2010-2014           | <b>11.1</b> § | 7.1 - 15.1  | <b>23.6</b> § | 19.5 - 27.8 | <b>51.2</b> § | 46.7 - 55.6  | <b>50.3</b>   | 44.5 - 56.1 | <b>12.7</b> § | 7.9 - 17.5   | <b>8.1</b> §  | 4.4 - 11.8  |
| Goiânia                            | 2000-2004           | <b>5.2</b>    | 2.4 - 8.0   |               | -           |               | -            |               | -           | 4.1 §         | 0.0 - 9.1    | <b>3.2</b> §  | 0.5 - 5.8   |
|                                    | 2005-2009           | <b>11.5</b>   | 6.5 - 16.6  |               | -           |               | -            |               | -           | <b>0.8</b> §  | 0.0 - 2.1    | <b>8.0</b> §  | 3.6 - 12.5  |
|                                    | 2010-2014           | <b>11.4</b>   | 3.7 - 19.1  |               | -           |               | -            |               | -           | 1.8 §         | 0.0 - 4.7    | <b>12.2</b> § | 4.0 - 20.3  |
| Jaú                                | 2000-2004           | 7.0           | 0.0 - 14.9  | <b>20.0</b>   | 11.7 - 28.3 | <b>46.8</b>   | 36.3 - 57.4  | 57.7          | 35.5 - 79.9 |               | -            | 0.0           | 0.0 - 0.1   |
|                                    | 2005-2009           | 3.0           | 0.0 - 7.6   | 12.7          | 4.0 - 21.4  | <b>43.9</b>   | 33.8 - 54.0  | 56.9          | 41.2 - 72.5 |               | -            | 2.1           | 0.0 - 5.3   |
|                                    | 2010-2014           | 0.0           | 0.0 - 0.1   | <b>27.4</b>   | 14.9 - 39.9 | <b>45.3</b>   | 32.9 - 57.7  | <b>69.9</b>   | 55.2 - 84.6 |               | -            | 0.0           | 0.0 - 0.1   |
| São Paulo                          | 2000-2004           | <b>11.1</b>   | 9.3 - 12.9  | <b>18.8</b> § | 17.6 - 19.9 | <b>43.9</b> § | 42.3 - 45.4  | <b>36.4</b> § | 34.4 - 38.5 |               | -            | <b>4.0</b> §  | 3.0 - 5.0   |
|                                    | 2005-2009           | <b>12.5</b> § | 10.4 - 14.6 | <b>24.5</b> § | 22.9 - 26.0 | <b>49.7</b> § | 48.1 - 51.2  | <b>43.9</b> § | 41.6 - 46.1 |               | -            | <b>9.3</b> §  | 7.4 - 11.2  |
|                                    | 2010-2014           | <b>11.6</b> § | 9.4 - 13.9  | <b>22.7</b> § | 20.9 - 24.6 | <b>51.9</b> § | 50.0 - 53.9  | <b>45.3</b> § | 42.5 - 48.2 |               | -            | <b>12.4</b> § | 9.7 - 15.0  |
| <b>Chile</b><br>(4 registries)     | 2000-2004           | <b>7.0</b>    | 3.1 - 10.9  | <b>14.5</b>   | 11.7 - 17.4 | <b>35.5</b>   | 28.6 - 42.3  | <b>35.9</b>   | 26.3 - 45.5 | 3.6 §         | 0.0 - 7.4    | <b>2.2</b>    | 0.2 - 4.2   |
|                                    | 2005-2009           | <b>10.8</b>   | 7.5 - 14.1  | <b>16.3</b>   | 14.7 - 18.0 | <b>47.1</b>   | 43.1 - 51.0  | <b>39.5</b>   | 33.9 - 45.0 | <b>2.7</b> §  | 1.0 - 4.4    | <b>3.6</b>    | 1.9 - 5.4   |
|                                    | 2010-2014           | <b>8.7</b>    | 0.3 - 17.0  | <b>16.7</b>   | 14.2 - 19.3 | <b>43.9</b> § | 39.3 - 48.5  | <b>32.7</b> § | 26.6 - 38.8 | <b>3.7</b> §  | 0.7 - 6.8    | 4.4           | 1.0 - 7.8   |
| Antofagasta                        | 2000-2004           | 0.0 §         | 0.0 - 0.1   | <b>15.4</b> § | 8.0 - 22.8  | 52.2 §        | 36.5 - 67.9  | 22.5 §        | 4.7 - 40.3  | 4.7 §         | 0.0 - 12.0   | 4.2 §         | 0.0 - 10.5  |
|                                    | 2005-2009           | 10.7 §        | 2.9 - 18.5  | <b>11.7</b>   | 7.9 - 15.4  | <b>45.3</b> § | 37.6 - 53.1  | <b>29.4</b> § | 17.4 - 41.3 | 1.4 §         | 0.0 - 3.6    | <b>2.7</b> §  | 0.3 - 5.2   |
|                                    | 2010-2014           | 12.2 §        | 0.0 - 28.8  | <b>15.4</b>   | 8.0 - 22.8  | <b>54.5</b> § | 40.0 - 69.0  | <b>50.8</b> § | 27.9 - 73.7 | 0.0 §         | 0.0 - 0.1    | 0.0 §         | 0.0 - 0.0   |
| Biobio                             | 2000-2004           | 1.9           | 0.0 - 4.9   | <b>10.6</b>   | 6.3 - 14.8  | 31.0          | 18.6 - 43.4  | 0.2           | 0.0 - 0.8   | 0.0 §         | 0.0 - 0.1    | 0.0           | 0.0 - 0.1   |
|                                    | 2005-2009           | 2.6           | 0.0 - 5.6   | <b>14.1</b>   | 11.2 - 17.1 | <b>35.7</b>   | 28.2 - 43.1  | <b>38.3</b>   | 27.5 - 49.0 |               |              |               |             |

**Web-table 4.1: Age-standardised five-year net survival (NS, %): adults (15-99 years) diagnosed with cancer of the oesophagus, stomach, colon, rectum, liver or pancreas, by continent, country, registry and calendar period of diagnosis (2000-2004, 2005-2009, 2010-2014)**

|                                   | Period of diagnosis | Oesophagus    |             | Stomach       |             | Colon         |             | Rectum        |             | Liver         |             | Pancreas      |             |
|-----------------------------------|---------------------|---------------|-------------|---------------|-------------|---------------|-------------|---------------|-------------|---------------|-------------|---------------|-------------|
|                                   |                     | NS (%)        | 95% CI      | NS (%)        | 95% CI      | NS (%)        | 95% CI      | NS (%)        | 95% CI      | NS (%)        | 95% CI      | NS (%)        | 95% CI      |
| <b>Colombia</b><br>(4 registries) | 2000-2004           | <b>10.7</b> § | 5.6 - 15.8  | <b>18.4</b>   | 16.0 - 20.9 | <b>45.0</b>   | 40.6 - 49.4 | <b>38.3</b>   | 32.9 - 43.7 | <b>4.8</b> §  | 1.8 - 7.9   | <b>6.4</b> §  | 3.5 - 9.4   |
|                                   | 2005-2009           | <b>9.5</b>    | 4.6 - 14.4  | <b>17.7</b>   | 16.2 - 19.3 | <b>41.3</b>   | 37.9 - 44.7 | <b>37.2</b>   | 32.7 - 41.7 | <b>5.4</b>    | 3.1 - 7.7   | <b>3.4</b>    | 1.6 - 5.2   |
|                                   | 2010-2014           | <b>10.5</b> § | 3.9 - 17.1  | <b>17.1</b> § | 15.4 - 18.8 | <b>34.5</b> § | 31.2 - 37.9 | <b>38.0</b> § | 33.2 - 42.8 | <b>5.2</b> §  | 2.7 - 7.8   | <b>5.3</b> §  | 2.8 - 7.8   |
| Bucaramanga                       | 2000-2004           | -             | -           | <b>11.3</b> § | 7.2 - 15.4  | -             | -           | -             | -           | -             | -           | -             | -           |
|                                   | 2005-2009           | -             | -           | <b>14.8</b>   | 11.8 - 17.7 | -             | -           | -             | -           | -             | -           | -             | -           |
|                                   | 2010-2014           | -             | -           | <b>14.0</b> § | 10.7 - 17.3 | -             | -           | -             | -           | -             | -           | -             | -           |
| Cali                              | 2000-2004           | <b>11.5</b> § | 5.6 - 17.3  | <b>18.4</b>   | 16.0 - 20.9 | <b>45.1</b>   | 40.5 - 49.7 | <b>37.9</b>   | 32.2 - 43.5 | <b>3.6</b> §  | 1.0 - 6.2   | <b>6.4</b> §  | 3.5 - 9.4   |
|                                   | 2005-2009           | <b>9.5</b>    | 4.6 - 14.4  | <b>18.1</b>   | 15.9 - 20.2 | <b>41.7</b>   | 38.1 - 45.2 | <b>37.0</b>   | 31.9 - 42.1 | <b>5.4</b>    | 3.1 - 7.7   | <b>3.4</b>    | 1.6 - 5.2   |
|                                   | 2010-2014           | <b>10.5</b> § | 3.9 - 17.1  | <b>17.1</b> § | 14.7 - 19.4 | <b>35.4</b> § | 31.8 - 38.9 | <b>35.8</b> § | 30.2 - 41.5 | <b>5.2</b> §  | 2.7 - 7.8   | <b>5.3</b> §  | 2.8 - 7.8   |
| Manizales                         | 2000-2004           | 27.4 §        | 0.3 - 54.6  | <b>38.3</b> § | 26.0 - 50.5 | <b>43.6</b>   | 29.6 - 57.7 | 46.5 §        | 25.0 - 68.1 | 22.4 §        | 0.0 - 45.6  | -             | -           |
|                                   | 2005-2009           | 7.9 §         | 0.0 - 18.9  | <b>20.7</b>   | 16.0 - 25.5 | <b>44.0</b> § | 35.7 - 52.3 | <b>43.5</b>   | 33.1 - 54.0 | 11.9 §        | 0.0 - 26.9  | 22.7 §        | 4.3 - 41.1  |
|                                   | 2010-2014           | 9.6 §         | 0.0 - 21.8  | <b>33.8</b> § | 24.8 - 42.8 | <b>51.3</b> § | 41.0 - 61.6 | <b>55.0</b> § | 39.8 - 70.1 | 17.5 §        | 0.0 - 44.2  | 25.3 §        | 6.2 - 44.4  |
| Pasto                             | 2000-2004           | 9.8 §         | 0.0 - 20.2  | <b>21.4</b>   | 16.5 - 26.3 | <b>27.9</b> § | 17.4 - 38.4 | 39.6          | 23.3 - 55.9 | 8.0 §         | 0.0 - 17.4  | 7.7 §         | 0.1 - 15.3  |
|                                   | 2005-2009           | 6.3 §         | 0.0 - 15.3  | <b>17.6</b>   | 13.3 - 21.8 | <b>34.6</b>   | 25.5 - 43.7 | <b>22.8</b>   | 13.3 - 32.2 | 6.6 §         | 0.0 - 13.5  | 3.9 §         | 0.0 - 9.2   |
|                                   | 2010-2014           | 0.0 §         | 0.0 - 0.0   | <b>12.8</b> § | 8.2 - 17.4  | <b>14.3</b> § | 8.1 - 20.5  | <b>32.8</b> § | 19.4 - 46.1 | 9.0 §         | 0.0 - 20.3  | 3.0 §         | 0.0 - 8.0   |
| <b>Costa Rica *</b>               | 2000-2004           | <b>35.7</b> § | 26.3 - 45.1 | <b>48.4</b>   | 45.5 - 51.2 | <b>63.8</b>   | 59.5 - 68.1 | <b>48.4</b>   | 41.3 - 55.6 | <b>39.0</b> § | 32.4 - 45.6 | <b>38.1</b> § | 31.3 - 44.8 |
|                                   | 2005-2009           | <b>19.2</b> § | 11.3 - 27.1 | <b>38.4</b>   | 36.3 - 40.5 | <b>55.1</b>   | 52.2 - 58.0 | <b>50.2</b>   | 45.2 - 55.2 | <b>23.6</b> § | 18.5 - 28.7 | <b>23.8</b> § | 19.1 - 28.6 |
|                                   | 2010-2014           | <b>20.9</b> § | 14.3 - 27.6 | <b>40.6</b>   | 38.5 - 42.7 | <b>60.1</b>   | 57.4 - 62.8 | <b>53.9</b>   | 49.2 - 58.5 | <b>24.1</b> § | 19.7 - 28.5 | <b>24.5</b> § | 19.5 - 29.5 |
| <b>Cuba *</b>                     | 2000-2004           | -             | -           | <b>17.2</b> § | 15.7 - 18.7 | <b>39.8</b> § | 38.3 - 41.2 | -             | -           | -             | -           | -             | -           |
|                                   | 2005-2009           | -             | -           | <b>25.6</b> § | 23.6 - 27.5 | <b>48.5</b> § | 46.9 - 50.1 | -             | -           | -             | -           | -             | -           |
|                                   | 2010-2014           | -             | -           | <b>35.7</b> § | 32.8 - 38.6 | <b>63.9</b> § | 61.6 - 66.2 | -             | -           | -             | -           | -             | -           |
| <b>Ecuador</b><br>(5 registries)  | 2000-2004           | 20.9          | 9.9 - 31.9  | <b>17.8</b>   | 12.3 - 23.3 | <b>47.7</b>   | 41.0 - 54.4 | <b>38.7</b>   | 30.4 - 47.1 | <b>8.1</b> §  | 4.6 - 11.5  | <b>8.4</b> §  | 4.7 - 12.2  |
|                                   | 2005-2009           | <b>7.7</b>    | 3.5 - 11.9  | <b>17.4</b>   | 12.0 - 22.7 | <b>46.7</b>   | 42.9 - 50.5 | <b>43.5</b>   | 38.8 - 48.2 | <b>6.3</b> §  | 4.1 - 8.6   | <b>9.0</b> §  | 6.2 - 11.8  |
|                                   | 2010-2014           | <b>12.7</b>   | 6.7 - 18.7  | <b>19.1</b>   | 13.1 - 25.1 | <b>47.8</b>   | 43.9 - 51.6 | <b>44.5</b>   | 39.2 - 49.8 | <b>5.9</b> §  | 3.9 - 7.8   | <b>8.4</b> §  | 5.7 - 11.2  |
| Cuenca                            | 2000-2004           | -             | -           | <b>0.0</b> §  | 0.0 - 0.0   | 23.0 §        | 7.4 - 38.5  | 21.2 §        | 0.0 - 44.1  | 5.1 §         | 0.0 - 12.8  | 0.0 §         | 0.0 - 0.1   |
|                                   | 2005-2009           | 10.8 §        | 0.0 - 26.4  | <b>1.4</b> §  | 0.0 - 3.0   | 11.3 §        | 0.2 - 22.4  | 12.7 §        | 0.1 - 25.4  | 0.0 §         | 0.0 - 0.1   | 1.1 §         | 0.0 - 3.7   |
|                                   | 2010-2014           | 17.3 §        | 0.0 - 39.7  | <b>34.0</b> § | 24.2 - 43.7 | <b>29.8</b> § | 15.7 - 43.9 | 20.1 §        | 0.0 - 40.4  | -             | -           | 1.8 §         | 0.0 - 5.7   |
| Guayaquil                         | 2000-2004           | -             | -           | -             | -           | -             | -           | -             | -           | -             | -           | -             | -           |
|                                   | 2005-2009           | 8.2           | 1.6 - 14.8  | <b>14.1</b> § | 11.4 - 16.7 | <b>44.0</b>   | 38.8 - 49.2 | <b>37.2</b>   | 30.7 - 43.8 | <b>5.5</b> §  | 2.5 - 8.4   | <b>5.7</b> §  | 2.8 - 8.5   |
|                                   | 2010-2014           | 10.7          | 3.1 - 18.2  | <b>14.2</b> § | 11.5 - 16.9 | <b>40.2</b>   | 35.4 - 44.9 | <b>38.2</b>   | 30.5 - 46.0 | <b>2.6</b> §  | 0.9 - 4.2   | <b>6.9</b> §  | 3.4 - 10.4  |
| Loja                              | 2000-2004           | -             | -           | <b>17.8</b>   | 12.3 - 23.3 | 43.8          | 25.6 - 62.1 | 29.6          | 3.9 - 55.4  | -             | -           | 1.0 §         | 0.0 - 3.6   |
|                                   | 2005-2009           | -             | -           | <b>17.4</b>   | 12.0 - 22.7 | 43.5          | 32.0 - 55.1 | 47.2          | 25.9 - 68.6 | 3.2 §         | 0.0 - 7.9   | 11.3 §        | 0.0 - 22.7  |
|                                   | 2010-2014           | -             | -           | <b>19.1</b>   | 13.1 - 25.1 | <b>49.1</b>   | 36.8 - 61.5 | 51.4          | 31.4 - 71.3 | 9.6 §         | 0.0 - 19.9  | 0.0 §         | 0.0 - 0.0   |
| Manabí                            | 2000-2004           | 9.8 §         | 0.0 - 21.2  | <b>16.9</b> § | 12.9 - 21.0 | <b>33.4</b> § | 22.7 - 44.2 | 28.6 §        | 15.0 - 42.2 | 6.4 §         | 0.0 - 14.3  | 10.9 §        | 0.0 - 22.1  |
|                                   | 2005-2009           | 8.4           | 0.1 - 16.7  | <b>13.8</b> § | 10.8 - 16.9 | <b>41.8</b> § | 33.0 - 50.7 | <b>40.4</b>   | 28.2 - 52.6 | 8.9 §         | 1.8 - 16.0  | 24.3 §        | 11.3 - 37.3 |
|                                   | 2010-2014           | 14.7          | 2.1 - 27.3  | <b>14.5</b> § | 11.3 - 17.8 | <b>39.8</b> § | 31.0 - 48.5 | <b>35.3</b>   | 23.4 - 47.2 | <b>10.7</b> § | 5.5 - 15.9  | 12.5 §        | 3.7 - 21.3  |
| Quito                             | 2000-2004           | 20.9          | 9.9 - 31.9  | <b>23.4</b> § | 20.0 - 26.8 | <b>47.8</b>   | 40.7 - 54.9 | <b>39.6</b>   | 30.9 - 48.2 | <b>8.6</b> §  | 4.6 - 12.7  | <b>11.1</b> § | 5.6 - 16.5  |
|                                   | 2005-2009           | 19.3 §        | 9.0 - 29.6  | <b>24.1</b> § | 21.0 - 27.1 | <b>48.8</b>   | 43.0 - 54.6 | <b>51.0</b>   | 43.3 - 58.7 | <b>8.2</b> §  | 3.9 - 12.5  | <b>7.5</b> §  | 3.9 - 11.2  |
|                                   | 2010-2014           | 13.7 §        | 4.5 - 22.9  | <b>25.3</b> § | 21.6 - 29.0 | <b>56.0</b>   | 49.2 - 62.8 | <b>54.3</b>   | 45.6 - 63.1 | <b>8.0</b> §  | 4.4 - 11.6  | <b>8.1</b> §  | 3.9 - 12.3  |
| <b>Guadeloupe *</b>               | 2000-2004           | -             | -           | -             | -           | -             | -           | -             | -           | -             | -           | -             | -           |
|                                   | 2005-2009           | 0.0           | 0.0 - 0.1   | <b>11.7</b> § | 5.7 - 17.7  | <b>30.9</b> § | 23.1 - 38.7 | <b>21.3</b> § | 8.8 - 33.8  | 9.5 §         | 0.0 - 20.3  | 11.2 §        | 1.7 - 20.8  |
|                                   | 2010-2014           | -             | -           | <b>11.7</b> § | 6.8 - 16.6  | <b>26.8</b> § | 19.5 - 34.0 | <b>35.6</b> § | 22.4 - 48.8 | 3.7 §         | 0.0 - 9.2   | -             | -           |
| <b>Martinique *</b>               | 2000-2004           | 4.2           | 0.4 - 8.1   | <b>29.7</b>   | 24.2 - 35.2 | <b>57.0</b>   | 50.4 - 63.6 | <b>44.1</b>   | 35.1 - 53.1 | <b>12.0</b>   | 5.6 - 18.4  | <b>13.4</b>   | 7.8 - 19.1  |
|                                   | 2005-2009           | <b>4.9</b>    | 1.1 - 8.7   | <b>33.0</b>   | 27.5 - 38.5 | <b>54.9</b>   | 49.5 - 60.3 | <b>54.0</b>   | 46.0 - 62.1 | <b>12.4</b>   | 5.6 - 19.1  | <b>6.9</b>    | 3.2 - 10.5  |
|                                   | 2010-2014           | 4.0           | 1.8 - 6.3   | <b>32.1</b>   | 24.5 - 39.6 | <b>53.6</b>   | 46.9 - 60.3 | <b>52.0</b>   | 42.2 - 61.7 | <b>15.6</b>   | 7.2 - 23.9  | <b>11.9</b>   | 6.5 - 17.3  |
| <b>Mexico (Childhood) †</b>       | 2000-2004           | -             | -           | -             | -           | -             | -           | -             | -           | -             | -           | -             | -           |
|                                   | 2005-2009           | -             | -           | -             | -           | -             | -           | -             | -           | -             | -           | -             | -           |
|                                   | 2010-2014           | -             | -           | -             | -           | -             | -           | -             | -           | -             | -           | -             | -           |
| <b>Peru (Lima)</b>                | 2000-2004           | -             | -           | -             | -           | -             | -           | -             | -           | -             | -           | -             | -           |
|                                   | 2005-2009           | -             | -           | -             | -           | -             | -           | -             | -           | -             | -           | -             | -           |
|                                   | 2010-2014           | -             | -           | -             | -           | <b>59.0</b>   | 55.8 - 62.1 | <b>54.8</b>   | 50.0 - 59.5 | -             | -           | -             | -           |
| <b>Puerto Rico *</b>              | 2000-2004           | <b>10.9</b>   | 8.5 - 13.4  | <b>26.6</b>   | 24.1 - 29.1 | <b>60.9</b>   | 59.3 - 62.5 | <b>53.9</b>   | 50.9 - 57.0 | <b>11.8</b> § | 9.0 - 14.6  | <b>8.8</b> §  | 6.3 - 11.2  |
|                                   | 2005-2009           | <b>13.0</b>   | 10.1 - 15.9 | <b>29.9</b>   | 27.3 - 32.5 | <b>62.1</b>   | 60.6 - 63.5 | <b>59.4</b>   | 56.6 - 62.3 | <b>8.7</b> §  | 6.9 - 10.5  | <b>9.0</b> §  | 6.9 - 11.1  |
|                                   | 2010-2014           | <b>20.4</b>   | 14.8 - 25.9 | <b>34.6</b>   | 30.3 - 39.0 | <b>63.4</b>   | 61.1 - 65.7 | <b>59.0</b>   | 54.6 - 63.4 | <b>14.2</b> § | 10.4 - 18.0 | <b>10.2</b> § | 7.1 - 13.3  |
| <b>Uruguay *</b>                  | 2000-2004           | -             | -           | -             | -           | -             | -           | -             | -           | -             | -           | -             | -           |
|                                   | 2005-2009           | <b>12.0</b> § | 8.4 - 15.6  | <b>20.5</b>   | 17.5 - 23.5 | <b>57.7</b>   | 55.0 - 60.4 | <b>50.5</b>   | 46.3 - 54.6 | <b>12.0</b> § | 4.4 - 19.7  | <b>4.3</b> §  | 2.3 - 6.3   |
|                                   | 2010-2014           | <b>8.0</b> §  | 5.3 - 10.7  | <b>18.5</b> § | 15.4 - 21.5 | <b>53.5</b>   | 49.2 - 57.7 | <b>50.1</b>   | 44.8 - 55.4 | <b>14.3</b> § | 8.0 - 20.6  | <b>4.4</b> §  | 3.0 - 5.8   |
| <b>AMERICA (NORTH)</b>            |                     |               |             |               |             |               |             |               |             |               |             |               |             |
| <b>Canada</b><br>(9 registries)   | 2000-2004           | <b>14.5</b>   | 13.4 - 15.6 | <b>25.1</b>   | 24.2 - 26.0 | <b>61.6</b>   | 61.1 - 62.1 | <b>61.9</b>   | 61.1 - 62.8 | <b>17.4</b>   | 16.2 - 18.5 | <b>7.9</b>    | 7.3 - 8.5   |
|                                   | 2005-2009           | <b>14.7</b>   | 13.7 - 15.7 | <b>26.6</b>   | 25.7 - 27.5 | <b>65.7</b>   | 65.2 - 66.2 | <b>65.5</b>   | 64.7 - 66.3 | <b>19.2</b>   | 18.2 - 20.2 | <b>9.4</b>    | 8.8 - 10.0  |
|                                   | 2010-2014           | <b>16.1</b>   | 15.1 - 17.1 | <b>29.6</b>   | 28.6 - 30.5 | <b>67.0</b>   | 66.5 - 67.5 | <b>66.8</b>   | 66.0 - 67.5 | <b>18.7</b>   | 17.8 - 19.7 | <b>10.8</b>   | 10.2 - 11.4 |
| Alberta                           | 2000-2004           | <b>13.3</b>   | 10.1 - 16.5 | <b>21.6</b>   | 19.0 - 24.3 | <b>59.1</b>   | 57.5 - 60.7 | <b>61.4</b>   | 58.8 - 64.0 | <b>13.3</b>   | 10.5 - 16.1 | <b>5.0</b>    | 3.6 - 6.3   |
|                                   | 2005-2009           | <b>11.3</b>   | 8.9 - 13.7  | <b>23.4</b>   | 20.8 - 26.0 | <b>63.4</b>   | 61.9 - 64.9 | <b>63.4</b>   | 61.0 - 65.8 | <b>15.5</b>   | 13.0 - 18.1 | <b>6.4</b>    | 5.1 - 7.7   |
|                                   | 2010-2014           | <b>15.5</b>   | 12.8 - 18.1 | <b>25.6</b>   | 22.8 - 28.3 | <b>65.5</b>   | 64.0 - 66.9 | <b>64.6</b>   | 62.4 - 66.8 | <b>18.4</b>   | 15.8 - 21.1 | <b>9.4</b>    | 7.7 - 11.0  |
| British Columbia                  | 2000-2004           | <b>13.0</b>   | 10.7 - 15.2 | <b>21.5</b>   | 19.3 - 23.7 | <b>61.5</b>   | 60.1 - 62.8 | <b>61.4</b>   | 59.4 - 63.5 | <b>15.3</b>   | 13.1 - 17.6 | <b>5.3</b>    | 4.0 - 6.5   |
|                                   | 2005-2009           | <b>16.1</b>   | 13.5 - 18.6 | <b>23.9</b>   | 21.7 - 26.2 | <b>65.6</b>   | 64.4 - 66.8 | <b>63.1</b>   | 61.2 - 64.9 | <b>15.3</b>   | 13.2 - 17.3 | <b>8.4</b>    | 7.0 - 9.8   |
|                                   | 2010-2014           | <b>17.3</b>   | 14.8 - 19.8 | <b>26.2</b>   | 23.9 - 28.5 | <b>66.2</b>   | 65.0 - 67.3 | <b>66.4</b>   | 64.6 - 68.2 | <b>13.7</b>   | 11.9 - 15.5 | <b>9.3</b>    | 7.9 - 10.7  |
| Manitoba                          | 2000-2004           | <b>8.9</b>    | 5.4 - 12.5  | <b>21.2</b>   | 17.4 - 25.0 | <b>58.6</b>   | 56.3 - 60.8 | <b>56.9</b>   | 53.1 - 60.7 | <b>5.2</b>    | 2.7 - 7.7   | <b>3.0</b>    | 1.6 - 4.5   |
|                                   | 2005-2009           | <b>9.8</b>    | 6.3 - 13.3  | <b>16.6</b>   | 13.3 - 20.0 | <b>62.9</b>   | 60.7 - 65.1 | <b>62.8</b>   | 59.2 - 66.4 | <b>6.7</b>    | 4.0 - 9.3   | <b>4.4</b>    | 2.8 - 6.0   |
|                                   | 2010-2014           |               |             |               |             |               |             |               |             |               |             |               |             |

**Web-table 4.1: Age-standardised five-year net survival (NS, %): adults (15-99 years) diagnosed with cancer of the oesophagus, stomach, colon, rectum, liver or pancreas, by continent, country, registry and calendar period of diagnosis (2000-2004, 2005-2009, 2010-2014)**

|                                  | Period of diagnosis | Oesophagus |             | Stomach |             | Colon  |             | Rectum |             | Liver  |             | Pancreas |             |
|----------------------------------|---------------------|------------|-------------|---------|-------------|--------|-------------|--------|-------------|--------|-------------|----------|-------------|
|                                  |                     | NS (%)     | 95% CI      | NS (%)  | 95% CI      | NS (%) | 95% CI      | NS (%) | 95% CI      | NS (%) | 95% CI      | NS (%)   | 95% CI      |
| Prince Edward Island             | 2000-2004           | 17.5       | 5.0 - 30.1  | 24.0    | 12.2 - 35.8 | 59.3   | 53.4 - 65.1 | 52.0   | 43.0 - 61.1 | 0.5    | 0.0 - 1.6   | 7.6      | 1.6 - 13.6  |
|                                  | 2005-2009           | 12.9       | 2.7 - 23.0  | 13.0    | 3.5 - 22.6  | 60.3   | 54.3 - 66.3 | 74.2   | 65.5 - 82.9 | 8.7    | 0.0 - 18.8  | 1.2      | 0.0 - 3.0   |
|                                  | 2010-2014           | 19.0       | 6.7 - 31.3  | 11.7    | 3.4 - 20.0  | 60.0   | 54.0 - 65.9 | 70.8   | 61.8 - 79.8 | 25.7   | 7.9 - 43.4  | 8.5      | 2.4 - 14.6  |
| Saskatchewan                     | 2000-2004           | 7.4        | 3.8 - 10.9  | 18.7    | 14.5 - 22.8 | 60.1   | 57.7 - 62.6 | 60.6   | 56.5 - 64.8 | 1.0 §  | 0.0 - 2.6   | 4.9      | 2.9 - 7.0   |
|                                  | 2005-2009           | 11.7       | 7.8 - 15.6  | 19.5    | 15.3 - 23.6 | 62.4   | 60.0 - 64.9 | 63.3   | 59.7 - 67.0 | 8.0    | 3.9 - 12.0  | 5.7      | 3.5 - 8.0   |
|                                  | 2010-2014           | 14.7       | 10.4 - 18.9 | 25.1    | 20.5 - 29.8 | 65.2   | 62.8 - 67.5 | 65.0   | 61.5 - 68.5 | 7.9    | 4.2 - 11.6  | 7.8      | 5.2 - 10.4  |
| United States<br>(48 registries) | 2000-2004           | 16.5       | 16.1 - 16.8 | 26.2    | 25.8 - 26.5 | 64.7   | 64.5 - 64.9 | 63.9   | 63.5 - 64.2 | 12.5   | 12.2 - 12.8 | 7.2      | 7.0 - 7.4   |
|                                  | 2005-2009           | 18.7       | 18.4 - 19.1 | 30.1    | 29.7 - 30.4 | 65.5   | 65.3 - 65.7 | 64.5   | 64.1 - 64.8 | 15.6   | 15.3 - 15.9 | 8.9      | 8.7 - 9.1   |
|                                  | 2010-2014           | 20.0       | 19.6 - 20.4 | 33.1    | 32.7 - 33.4 | 64.9   | 64.7 - 65.1 | 64.1   | 63.7 - 64.4 | 17.4   | 17.1 - 17.7 | 11.5     | 11.3 - 11.7 |
| Alabama                          | 2000-2004           | 13.5       | 11.2 - 15.8 | 27.0    | 24.4 - 29.7 | 64.3   | 62.9 - 65.6 | 60.7   | 58.0 - 63.4 | 9.1    | 6.9 - 11.3  | 6.5      | 5.3 - 7.7   |
|                                  | 2005-2009           | 13.6       | 11.5 - 15.8 | 29.3    | 26.7 - 31.9 | 63.9   | 62.6 - 65.2 | 63.0   | 60.4 - 65.6 | 10.6   | 8.5 - 12.7  | 8.3      | 7.1 - 9.5   |
|                                  | 2010-2014           | 14.7       | 12.5 - 16.9 | 33.1    | 30.4 - 35.8 | 63.2   | 61.9 - 64.5 | 63.2   | 60.6 - 65.9 | 11.8   | 9.9 - 13.7  | 11.5     | 10.1 - 12.9 |
| Alaska                           | 2000-2004           | 22.3       | 15.4 - 29.2 | 26.5    | 19.4 - 33.6 | 69.4   | 64.9 - 74.0 | 63.5   | 56.5 - 70.4 | 12.5   | 7.4 - 17.6  | 8.2      | 4.8 - 11.6  |
|                                  | 2005-2009           | 17.8       | 11.7 - 23.8 | 23.1    | 16.7 - 29.5 | 67.1   | 63.1 - 71.1 | 58.0   | 49.9 - 66.1 | 22.6   | 15.6 - 29.5 | 4.2      | 1.9 - 6.5   |
|                                  | 2010-2014           | 21.9       | 14.8 - 28.9 | 27.1    | 19.4 - 34.8 | 64.5   | 60.1 - 68.9 | 55.3   | 45.9 - 64.6 | 21.4   | 13.9 - 28.8 | 7.4      | 3.9 - 10.8  |
| Arkansas                         | 2000-2004           | 13.6       | 10.5 - 16.7 | 22.8    | 19.7 - 25.9 | 62.6   | 60.9 - 64.3 | 60.5   | 57.5 - 63.4 | 8.4    | 5.8 - 10.9  | 6.0      | 4.6 - 7.4   |
|                                  | 2005-2009           | 12.2       | 9.5 - 15.0  | 25.3    | 22.0 - 28.7 | 64.0   | 62.2 - 65.7 | 59.9   | 56.8 - 62.9 | 15.0   | 12.2 - 17.8 | 5.7      | 4.4 - 6.9   |
|                                  | 2010-2014           | 15.7       | 10.3 - 21.0 | 28.5    | 22.9 - 34.0 | 61.6   | 59.0 - 64.3 | 58.8   | 54.0 - 63.7 | 14.8   | 10.7 - 19.0 | 7.1      | 4.7 - 9.6   |
| California                       | 2000-2004           | 15.0       | 14.0 - 16.0 | 25.6    | 24.7 - 26.4 | 63.9   | 63.3 - 64.4 | 63.8   | 62.9 - 64.7 | 12.8   | 12.2 - 13.5 | 6.3      | 5.9 - 6.8   |
|                                  | 2005-2009           | 16.6       | 15.6 - 17.7 | 29.9    | 29.0 - 30.8 | 66.4   | 65.9 - 66.9 | 65.1   | 64.2 - 66.0 | 16.7   | 16.0 - 17.4 | 8.6      | 8.1 - 9.1   |
|                                  | 2010-2014           | 17.8       | 16.1 - 19.6 | 31.6    | 30.1 - 33.0 | 66.0   | 65.2 - 66.8 | 66.4   | 64.9 - 67.8 | 19.5   | 18.3 - 20.7 | 11.0     | 10.1 - 11.9 |
| Greater Bay Area                 | 2000-2004           | 14.0       | 11.8 - 16.2 | 25.6    | 23.7 - 27.6 | 65.6   | 64.5 - 66.8 | 66.7   | 64.6 - 68.8 | 15.4   | 13.8 - 17.0 | 6.3      | 5.2 - 7.3   |
|                                  | 2005-2009           | 18.6       | 16.2 - 21.0 | 31.1    | 29.1 - 33.2 | 67.9   | 66.8 - 69.0 | 65.6   | 63.6 - 67.7 | 19.0   | 17.5 - 20.5 | 9.2      | 8.1 - 10.3  |
|                                  | 2010-2014           | 20.0       | 17.5 - 22.4 | 33.7    | 31.6 - 35.8 | 67.4   | 66.3 - 68.6 | 66.8   | 64.8 - 68.9 | 21.0   | 19.5 - 22.5 | 13.3     | 12.0 - 14.7 |
| Greater California               | 2000-2004           | 14.2       | 12.9 - 15.5 | 21.7    | 20.5 - 22.9 | 63.1   | 62.3 - 63.8 | 62.6   | 61.4 - 63.9 | 9.9    | 9.0 - 10.8  | 5.1      | 4.6 - 5.7   |
|                                  | 2005-2009           | 15.5       | 14.2 - 16.8 | 25.5    | 24.2 - 26.7 | 65.6   | 64.9 - 66.3 | 63.8   | 62.6 - 65.1 | 13.8   | 12.9 - 14.7 | 6.8      | 6.2 - 7.4   |
|                                  | 2010-2014           | 17.0       | 15.7 - 18.3 | 28.6    | 27.3 - 29.8 | 64.3   | 63.6 - 65.0 | 63.2   | 62.0 - 64.4 | 16.2   | 15.2 - 17.1 | 9.2      | 8.5 - 9.9   |
| Los Angeles                      | 2000-2004           | 15.7       | 13.6 - 17.9 | 27.0    | 25.4 - 28.6 | 62.7   | 61.7 - 63.8 | 62.9   | 61.1 - 64.7 | 11.6   | 10.3 - 12.8 | 6.0      | 5.1 - 6.9   |
|                                  | 2005-2009           | 15.1       | 13.0 - 17.3 | 31.2    | 29.6 - 32.8 | 65.2   | 64.2 - 66.2 | 65.2   | 63.5 - 67.0 | 15.8   | 14.5 - 17.0 | 8.7      | 7.7 - 9.7   |
|                                  | 2010-2014           | 16.7       | 14.5 - 18.9 | 33.5    | 31.8 - 35.1 | 63.7 § | 62.6 - 64.7 | 64.3 § | 62.5 - 66.1 | 17.9   | 16.5 - 19.2 | 10.2     | 9.2 - 11.3  |
| Colorado                         | 2000-2004           | 16.7       | 14.0 - 19.5 | 25.5    | 22.5 - 28.5 | 63.0   | 61.5 - 64.5 | 61.6   | 58.9 - 64.3 | 11.7   | 9.4 - 13.9  | 6.1      | 4.9 - 7.4   |
|                                  | 2005-2009           | 16.8       | 14.2 - 19.4 | 26.2    | 23.3 - 29.0 | 65.6   | 64.1 - 67.0 | 66.6   | 63.9 - 69.2 | 17.1   | 14.8 - 19.3 | 9.1      | 7.7 - 10.4  |
|                                  | 2010-2014           | 21.0       | 17.6 - 24.5 | 28.5    | 25.3 - 31.7 | 66.0   | 64.4 - 67.7 | 65.4   | 62.5 - 68.2 | 17.8   | 15.1 - 20.4 | 10.9     | 9.2 - 12.6  |
| Connecticut                      | 2000-2004           | 17.6       | 15.0 - 20.3 | 29.6    | 27.0 - 32.2 | 67.0   | 65.7 - 68.3 | 64.1   | 61.7 - 66.6 | 11.8   | 9.5 - 14.1  | 7.5      | 6.2 - 8.8   |
|                                  | 2005-2009           | 20.1       | 17.3 - 22.9 | 34.2    | 31.6 - 36.9 | 68.6   | 67.2 - 70.0 | 66.0   | 63.6 - 68.5 | 16.1   | 13.9 - 18.4 | 9.1      | 7.8 - 10.4  |
|                                  | 2010-2014           | 23.9       | 20.7 - 27.1 | 35.7    | 33.0 - 38.4 | 67.1   | 65.7 - 68.6 | 65.6   | 63.0 - 68.2 | 17.9   | 15.6 - 20.3 | 11.9     | 10.3 - 13.5 |
| Delaware                         | 2000-2004           | 13.5       | 9.3 - 17.7  | 28.3    | 22.6 - 34.0 | 64.1   | 61.2 - 66.9 | 69.0   | 63.3 - 74.8 | 10.0   | 5.1 - 14.9  | 6.9      | 4.2 - 9.6   |
|                                  | 2005-2009           | 13.1       | 9.0 - 17.3  | 25.7    | 20.5 - 30.9 | 67.5   | 64.7 - 70.3 | 63.2   | 57.8 - 68.5 | 15.6   | 11.0 - 20.1 | 7.8      | 5.3 - 10.2  |
|                                  | 2010-2014           | 16.9       | 12.3 - 21.5 | 26.9    | 21.6 - 32.1 | 67.2   | 64.2 - 70.1 | 67.0   | 61.3 - 72.6 | 20.8   | 15.9 - 25.7 | 10.9     | 8.1 - 13.7  |
| Florida                          | 2000-2004           | 17.3       | 16.1 - 18.5 | 28.2    | 27.0 - 29.4 | 64.6   | 64.0 - 65.1 | 62.7   | 61.6 - 63.9 | 14.7   | 13.6 - 15.8 | 9.1      | 8.5 - 9.8   |
|                                  | 2005-2009           | 20.5       | 19.2 - 21.7 | 31.5    | 30.2 - 32.7 | 63.9   | 63.3 - 64.5 | 63.4   | 62.2 - 64.5 | 16.8   | 15.8 - 17.8 | 11.6     | 11.0 - 12.3 |
|                                  | 2010-2014           | 21.1       | 19.6 - 22.5 | 33.6    | 32.2 - 35.0 | 63.8   | 63.1 - 64.5 | 62.1   | 60.8 - 63.3 | 17.9   | 16.7 - 19.1 | 13.3     | 12.5 - 14.1 |
| Georgia                          | 2000-2004           | 12.6       | 10.8 - 14.4 | 25.2    | 23.1 - 27.2 | 62.5   | 61.4 - 63.6 | 65.5   | 63.4 - 67.7 | 8.3    | 6.7 - 9.9   | 5.3      | 4.5 - 6.2   |
|                                  | 2005-2009           | 14.2       | 12.5 - 16.0 | 28.7    | 26.7 - 30.6 | 64.3   | 63.3 - 65.4 | 63.9   | 61.9 - 66.0 | 14.0   | 12.5 - 15.6 | 7.2      | 6.4 - 8.0   |
|                                  | 2010-2014           | 17.0       | 15.0 - 19.0 | 32.1    | 30.2 - 34.1 | 62.3   | 61.3 - 63.4 | 63.1   | 61.1 - 65.1 | 15.0   | 13.4 - 16.5 | 10.0     | 9.0 - 10.9  |
| Atlanta                          | 2000-2004           | 14.5       | 11.1 - 17.9 | 27.0    | 23.4 - 30.7 | 62.3   | 60.3 - 64.3 | 68.3   | 64.0 - 72.6 | 8.5    | 5.6 - 11.3  | 5.8      | 4.3 - 7.4   |
|                                  | 2005-2009           | 13.4       | 10.4 - 16.5 | 28.9    | 25.4 - 32.4 | 64.5   | 62.5 - 66.5 | 67.9   | 63.8 - 72.0 | 14.1   | 11.3 - 16.9 | 9.6      | 7.9 - 11.3  |
|                                  | 2010-2014           | 17.2       | 13.1 - 21.3 | 34.3    | 30.9 - 37.8 | 61.9   | 60.0 - 63.9 | 65.0   | 61.4 - 68.7 | 15.6   | 12.9 - 18.3 | 13.3     | 11.3 - 15.2 |
| Hawaii                           | 2000-2004           | 11.4       | 7.4 - 15.4  | 32.2    | 28.4 - 36.0 | 67.0   | 64.7 - 69.2 | 62.1   | 58.1 - 66.2 | 13.9   | 10.9 - 17.0 | 4.3      | 2.6 - 6.0   |
|                                  | 2005-2009           | 11.6       | 7.8 - 15.5  | 33.5    | 29.6 - 37.3 | 67.0   | 64.8 - 69.3 | 65.7   | 61.6 - 69.9 | 17.2   | 14.2 - 20.2 | 8.0      | 6.0 - 10.0  |
|                                  | 2010-2014           | 9.1        | 5.7 - 12.5  | 33.3    | 29.4 - 37.1 | 66.2   | 64.0 - 68.4 | 65.1   | 61.1 - 69.2 | 16.6   | 13.8 - 19.4 | 10.0     | 7.7 - 12.3  |
| Idaho                            | 2000-2004           | 20.1       | 15.3 - 25.0 | 26.5    | 21.4 - 31.5 | 64.5   | 61.8 - 67.2 | 64.9   | 60.2 - 69.5 | 12.2   | 7.2 - 17.2  | 5.0      | 3.2 - 6.9   |
|                                  | 2005-2009           | 16.5       | 12.5 - 20.5 | 25.2    | 20.2 - 30.1 | 67.2   | 64.7 - 69.8 | 64.9   | 60.4 - 69.4 | 11.1   | 7.4 - 14.7  | 7.0      | 4.9 - 9.1   |
|                                  | 2010-2014           | 14.3       | 10.5 - 18.1 | 30.4    | 25.1 - 35.8 | 65.9   | 63.4 - 68.5 | 60.8   | 56.5 - 65.0 | 12.9   | 8.8 - 17.0  | 7.4      | 5.4 - 9.4   |
| Indiana                          | 2000-2004           | 18.6       | 16.4 - 20.9 | 23.9    | 21.5 - 26.2 | 64.2   | 63.1 - 65.3 | 66.0   | 63.9 - 68.0 | 15.6   | 13.3 - 18.0 | 5.8      | 4.9 - 6.7   |
|                                  | 2005-2009           | 18.0       | 15.9 - 20.1 | 27.9    | 25.5 - 30.4 | 64.7   | 63.6 - 65.9 | 65.0   | 63.0 - 67.0 | 14.2   | 12.4 - 16.0 | 6.9      | 5.9 - 7.9   |
|                                  | 2010-2014           | 17.9       | 15.9 - 20.0 | 29.8    | 27.3 - 32.3 | 64.1   | 63.0 - 65.2 | 63.1   | 61.0 - 65.2 | 13.1   | 11.5 - 14.8 | 9.0      | 7.9 - 10.1  |
| Iowa                             | 2000-2004           | 22.4       | 19.1 - 25.6 | 21.8    | 18.6 - 25.0 | 66.6   | 65.1 - 68.0 | 67.2   | 64.7 - 69.8 | 11.1   | 8.3 - 13.9  | 5.0      | 3.8 - 6.3   |
|                                  | 2005-2009           | 22.7       | 19.6 - 25.9 | 25.3    | 22.1 - 28.6 | 66.8   | 65.4 - 68.3 | 64.9   | 62.1 - 67.6 | 15.2   | 12.4 - 18.0 | 8.1      | 6.7 - 9.5   |
|                                  | 2010-2014           | 20.8       | 17.9 - 23.7 | 29.2    | 25.7 - 32.7 | 65.7   | 64.2 - 67.2 | 64.2   | 61.5 - 67.0 | 15.7   | 12.9 - 18.5 | 9.1      | 7.6 - 10.6  |
| Kentucky                         | 2000-2004           | 13.6       | 11.3 - 15.9 | 21.0    | 18.4 - 23.5 | 63.5   | 62.2 - 64.8 | 62.2   | 59.8 - 64.5 | 9.2    | 7.1 - 11.3  | 5.1      | 4.1 - 6.1   |
|                                  | 2005-2009           | 15.7       | 13.3 - 18.0 | 27.6    | 24.7 - 30.4 | 64.5   | 63.2 - 65.8 | 63.1   | 60.7 - 65.5 | 13.0   | 10.9 - 15.1 | 7.1      | 5.8 - 8.3   |
|                                  | 2010-2014           | 16.0       | 13.6 - 18.5 | 31.1    | 28.2 - 34.0 | 65.2   | 63.9 - 66.6 | 63.1   | 60.6 - 65.7 | 14.0   | 11.9 - 16.1 | 8.5      | 7.3 - 9.7   |
| Louisiana                        | 2000-2004           | 14.0       | 11.6 - 16.4 | 24.8    | 22.4 - 27.1 | 62.3   | 61.0 - 63.6 | 60.0   | 57.5 - 62.5 | 10.5   | 8.6 - 12.3  | 6.4      | 5.3 - 7.5   |
|                                  | 2005-2009           | 14.9       | 12.5 - 17.3 | 23.7    | 21.3 - 26.0 | 64.0   | 62.6 - 65.3 | 61.1   | 58.6 - 63.6 | 11.3   | 9.5 - 13.2  | 5.8      | 4.8 - 6.8   |
|                                  | 2010-2014           | 14.7       | 12.4 - 17.1 | 26.4    | 24.0 - 28.8 | 63.1   | 61.7 - 64.5 | 63.2   | 60.6 - 65.8 | 12.4   | 10.7 - 14.2 | 7.0      | 5.8 - 8.1   |
| Maine                            | 2000-2004           | 13.9       | 10.7 - 17.1 | 18.0    | 14.2 - 21.9 | 68.0   | 65.8 - 70.1 | 69.4   | 65.5 - 73.3 | 11.3   | 7.5 - 15.0  | 4.3      | 2.8 - 5.8   |
|                                  | 2005-2009           | 19.6       | 15.9 - 23.4 | 26.1    | 21.6 - 30.7 | 68.5   | 66.2 - 70.8 | 65.4   | 61.4 - 69.3 | 9.6    | 6.6 - 12.5  | 8.6      | 6.5 - 10.7  |
|                                  | 2010-2014           | 21.7       | 17.2 - 26.3 | 32.6    | 27.0 - 38.1 | 66.5   | 63.9 - 69.2 | 65.7   | 61.2 - 70.2 | 10.5   | 7.0 - 14.1  | 9.7      | 7.1 - 12.3  |
| Massachusetts                    | 2000-2004           | 19.8       | 17.9 -      |         |             |        |             |        |             |        |             |          |             |

**Web-table 4.1: Age-standardised five-year net survival (NS, %): adults (15-99 years) diagnosed with cancer of the oesophagus, stomach, colon, rectum, liver or pancreas, by continent, country, registry and calendar period of diagnosis (2000-2004, 2005-2009, 2010-2014)**

|                | Period of diagnosis | Oesophagus |             | Stomach |             | Colon  |             | Rectum |             | Liver  |             | Pancreas |             |
|----------------|---------------------|------------|-------------|---------|-------------|--------|-------------|--------|-------------|--------|-------------|----------|-------------|
|                |                     | NS (%)     | 95% CI      | NS (%)  | 95% CI      | NS (%) | 95% CI      | NS (%) | 95% CI      | NS (%) | 95% CI      | NS (%)   | 95% CI      |
| Mississippi    | 2000-2004           | 12.4       | 9.0 - 15.9  | 26.9    | 22.6 - 31.1 | 65.8   | 63.6 - 68.0 | 64.5   | 60.1 - 68.8 | 7.9 §  | 4.8 - 10.9  | 4.8      | 3.1 - 6.6   |
|                | 2005-2009           | 11.2       | 8.6 - 13.8  | 25.4    | 22.3 - 28.5 | 63.0   | 61.3 - 64.6 | 63.2   | 59.7 - 66.7 | 12.4   | 9.9 - 15.0  | 6.8      | 5.5 - 8.2   |
|                | 2010-2014           | 15.2       | 11.6 - 18.9 | 23.7    | 20.8 - 26.7 | 61.2   | 59.5 - 62.8 | 61.2   | 57.9 - 64.6 | 13.9   | 11.2 - 16.5 | 7.9      | 6.5 - 9.4   |
| Missouri       | 2000-2004           | -          | -           | -       | -           | -      | -           | -      | -           | -      | -           | -        | -           |
|                | 2005-2009           | -          | -           | -       | -           | -      | -           | -      | -           | -      | -           | -        | -           |
|                | 2010-2014           | -          | -           | -       | -           | -      | -           | -      | -           | -      | -           | -        | -           |
| Montana        | 2000-2004           | 17.1       | 12.0 - 22.2 | 22.1    | 17.1 - 27.2 | 69.2   | 66.4 - 72.0 | 63.8   | 59.0 - 68.6 | 10.1   | 5.3 - 14.9  | 4.8      | 2.9 - 6.7   |
|                | 2005-2009           | 20.6       | 15.8 - 25.4 | 23.5    | 18.3 - 28.7 | 64.9   | 62.1 - 67.7 | 64.5   | 59.6 - 69.5 | 10.9   | 6.6 - 15.2  | 7.0      | 4.9 - 9.1   |
|                | 2010-2014           | 21.3       | 16.3 - 26.3 | 30.1    | 23.9 - 36.3 | 66.1   | 63.3 - 68.9 | 66.1   | 61.0 - 71.3 | 13.3   | 8.5 - 18.0  | 11.5     | 8.4 - 14.6  |
| Nebraska       | 2000-2004           | 17.5       | 13.4 - 21.5 | 23.7    | 19.4 - 28.1 | 65.1   | 63.2 - 67.1 | 61.9   | 58.4 - 65.4 | 9.2    | 5.9 - 12.5  | 5.1      | 3.4 - 6.7   |
|                | 2005-2009           | 19.1       | 15.1 - 23.0 | 24.5    | 20.3 - 28.7 | 66.2   | 64.2 - 68.1 | 69.0   | 65.6 - 72.4 | 11.7   | 8.5 - 14.8  | 7.3      | 5.6 - 9.0   |
|                | 2010-2014           | 17.6       | 14.0 - 21.3 | 29.9    | 25.2 - 34.5 | 68.2   | 66.2 - 70.2 | 66.5   | 62.9 - 70.0 | 12.8   | 9.5 - 16.0  | 9.4      | 7.2 - 11.7  |
| New Hampshire  | 2000-2004           | 16.1       | 12.1 - 20.1 | 22.2    | 17.6 - 26.9 | 66.9   | 64.6 - 69.3 | 66.4   | 62.0 - 70.7 | 11.3   | 7.2 - 15.5  | 5.7      | 3.8 - 7.6   |
|                | 2005-2009           | 22.2       | 18.2 - 26.1 | 30.0    | 25.0 - 35.0 | 68.7   | 66.3 - 71.1 | 68.8   | 64.2 - 73.3 | 11.6   | 8.5 - 14.7  | 9.6      | 7.3 - 11.9  |
|                | 2010-2014           | 27.4       | 22.9 - 31.9 | 40.0    | 34.6 - 45.5 | 67.7   | 65.1 - 70.2 | 70.3   | 65.7 - 74.9 | 14.6   | 10.3 - 18.9 | 11.7     | 9.1 - 14.3  |
| New Jersey     | 2000-2004           | 16.9       | 15.1 - 18.7 | 27.4    | 25.7 - 29.0 | 64.4 § | 63.6 - 65.3 | 63.7 § | 62.1 - 65.3 | 12.3   | 10.9 - 13.8 | 7.1      | 6.3 - 8.0   |
|                | 2005-2009           | 19.4       | 17.5 - 21.2 | 32.0    | 30.3 - 33.7 | 63.9 § | 63.0 - 64.8 | 61.4 § | 59.7 - 63.0 | 16.1   | 14.6 - 17.6 | 9.0      | 8.1 - 9.9   |
|                | 2010-2014           | 20.0       | 18.1 - 22.0 | 34.6 §  | 32.8 - 36.4 | 62.0 § | 61.1 - 62.9 | 61.4 § | 59.7 - 63.1 | 17.9   | 16.3 - 19.4 | 11.4     | 10.4 - 12.5 |
| New Mexico     | 2000-2004           | 11.4       | 7.9 - 14.8  | 20.9    | 17.4 - 24.5 | 61.4   | 59.2 - 63.7 | 58.3   | 54.4 - 62.2 | 6.4    | 4.3 - 8.5   | 6.0      | 4.0 - 7.9   |
|                | 2005-2009           | 15.3       | 11.2 - 19.5 | 25.1    | 21.6 - 28.7 | 63.2   | 61.0 - 65.4 | 60.7   | 56.9 - 64.4 | 12.2   | 9.7 - 14.8  | 6.8      | 5.1 - 8.5   |
|                | 2010-2014           | 14.9       | 11.0 - 18.8 | 27.1    | 23.4 - 30.7 | 59.9   | 57.7 - 62.1 | 57.4   | 53.6 - 61.2 | 12.3   | 9.9 - 14.7  | 8.1      | 6.2 - 10.0  |
| New York       | 2000-2004           | 16.2       | 15.0 - 17.4 | 28.8    | 27.8 - 29.9 | 64.1   | 63.5 - 64.7 | 63.0   | 61.9 - 64.1 | 15.0   | 14.0 - 16.0 | 8.1      | 7.5 - 8.7   |
|                | 2005-2009           | 19.0       | 17.8 - 20.2 | 35.6    | 34.5 - 36.8 | 65.3   | 64.7 - 65.9 | 63.6   | 62.5 - 64.8 | 19.6   | 18.6 - 20.5 | 10.8     | 10.2 - 11.4 |
|                | 2010-2014           | 21.0       | 19.7 - 22.3 | 39.6    | 38.5 - 40.8 | 65.4   | 64.7 - 66.0 | 64.0   | 62.8 - 65.1 | 21.7   | 20.7 - 22.7 | 13.7     | 13.0 - 14.4 |
| New York City  | 2000-2004           | 15.7       | 13.7 - 17.6 | 31.9    | 30.3 - 33.5 | 62.5   | 61.5 - 63.4 | 61.6   | 59.7 - 63.4 | 16.4   | 15.0 - 17.8 | 9.3      | 8.3 - 10.3  |
|                | 2005-2009           | 16.9       | 14.9 - 19.0 | 38.5    | 36.9 - 40.1 | 64.4   | 63.4 - 65.3 | 62.8   | 61.0 - 64.6 | 22.3   | 20.8 - 23.7 | 11.9     | 10.9 - 13.0 |
|                | 2010-2014           | 20.8       | 18.3 - 23.2 | 43.7    | 42.1 - 45.4 | 65.2   | 64.2 - 66.2 | 64.7   | 62.8 - 66.6 | 24.5   | 23.1 - 26.0 | 14.9     | 13.8 - 16.0 |
| North Carolina | 2000-2004           | 15.7       | 13.9 - 17.5 | 25.3    | 23.3 - 27.3 | 64.5   | 63.5 - 65.5 | 64.2   | 62.2 - 66.1 | 9.4    | 7.8 - 11.0  | 5.9      | 5.0 - 6.7   |
|                | 2005-2009           | 17.6       | 15.8 - 19.4 | 31.3    | 29.3 - 33.3 | 65.8   | 64.9 - 66.8 | 64.2   | 62.4 - 66.0 | 13.8   | 12.2 - 15.4 | 8.2      | 7.4 - 9.1   |
|                | 2010-2014           | 18.9       | 17.1 - 20.8 | 35.2    | 33.3 - 37.2 | 64.8   | 63.8 - 65.8 | 63.1   | 61.2 - 64.9 | 15.6   | 14.0 - 17.1 | 11.0     | 10.0 - 12.0 |
| Ohio           | 2000-2004           | 14.6       | 13.2 - 16.0 | 24.2    | 22.6 - 25.9 | 63.4   | 62.6 - 64.2 | 63.3   | 61.9 - 64.8 | 9.3    | 7.9 - 10.6  | 5.7      | 5.0 - 6.4   |
|                | 2005-2009           | 18.1       | 16.6 - 19.6 | 26.7    | 25.1 - 28.4 | 64.2   | 63.4 - 65.0 | 62.9   | 61.4 - 64.4 | 12.1   | 10.7 - 13.5 | 6.9      | 6.2 - 7.6   |
|                | 2010-2014           | 19.8       | 18.2 - 21.4 | 32.2    | 30.4 - 34.0 | 64.5   | 63.7 - 65.4 | 63.1   | 61.6 - 64.7 | 15.5   | 14.0 - 17.0 | 10.0     | 9.1 - 10.8  |
| Oklahoma       | 2000-2004           | 13.3       | 10.6 - 16.0 | 19.8    | 17.0 - 22.6 | 61.6   | 60.1 - 63.1 | 60.4   | 57.5 - 63.3 | 8.9    | 6.7 - 11.0  | 6.4      | 5.1 - 7.8   |
|                | 2005-2009           | 14.7       | 12.0 - 17.3 | 25.6    | 22.5 - 28.7 | 64.7   | 63.2 - 66.2 | 62.4   | 59.5 - 65.2 | 14.1   | 11.7 - 16.4 | 7.2      | 5.9 - 8.5   |
|                | 2010-2014           | 18.7       | 12.5 - 25.0 | 25.6    | 18.9 - 32.3 | 68.6   | 65.1 - 72.1 | 65.7   | 59.2 - 72.3 | 21.1   | 14.3 - 27.9 | 7.7      | 4.3 - 11.2  |
| Oregon         | 2000-2004           | 15.7       | 13.1 - 18.4 | 21.9    | 19.0 - 24.7 | 66.3   | 64.8 - 67.8 | 65.1   | 62.5 - 67.8 | 8.2    | 6.0 - 10.3  | 5.3      | 4.1 - 6.5   |
|                | 2005-2009           | 23.2       | 20.4 - 26.0 | 30.4    | 27.2 - 33.6 | 64.6   | 63.1 - 66.1 | 65.1   | 62.5 - 67.7 | 11.8   | 9.7 - 13.9  | 5.8      | 4.7 - 7.0   |
|                | 2010-2014           | 22.8       | 19.8 - 25.8 | 32.4    | 28.9 - 35.9 | 65.3   | 63.6 - 67.0 | 63.3   | 60.4 - 66.2 | 14.0   | 11.6 - 16.4 | 8.6      | 7.0 - 10.2  |
| Pennsylvania   | 2000-2004           | 15.1       | 13.8 - 16.4 | 25.1    | 23.7 - 26.5 | 64.7   | 64.0 - 65.4 | 62.9   | 61.6 - 64.1 | 12.7   | 11.4 - 14.0 | 6.3      | 5.6 - 7.0   |
|                | 2005-2009           | 19.5       | 18.1 - 20.9 | 28.9    | 27.4 - 30.3 | 65.8   | 65.1 - 66.5 | 65.3   | 63.9 - 66.6 | 15.0   | 13.8 - 16.2 | 8.0      | 7.3 - 8.7   |
|                | 2010-2014           | 20.4       | 18.9 - 21.9 | 32.4    | 30.9 - 33.9 | 64.9   | 64.2 - 65.7 | 64.0   | 62.7 - 65.4 | 17.6   | 16.3 - 18.8 | 11.1     | 10.3 - 12.0 |
| Rhode Island   | 2000-2004           | 19.3       | 14.8 - 23.8 | 27.6    | 23.3 - 31.9 | 68.3   | 65.9 - 70.6 | 62.3   | 57.8 - 66.7 | 10.4   | 7.1 - 13.7  | 7.1      | 4.9 - 9.3   |
|                | 2005-2009           | 23.2       | 18.7 - 27.6 | 34.8    | 29.6 - 39.9 | 66.9   | 64.3 - 69.5 | 63.8   | 58.9 - 68.6 | 11.7   | 8.4 - 14.9  | 9.7      | 7.4 - 12.1  |
|                | 2010-2014           | 30.3       | 24.9 - 35.7 | 39.0    | 33.8 - 44.2 | 64.5   | 61.7 - 67.2 | 67.2   | 62.2 - 72.3 | 11.6   | 8.2 - 15.0  | 10.1     | 7.6 - 12.6  |
| South Carolina | 2000-2004           | 12.6       | 10.4 - 14.8 | 24.4    | 21.9 - 26.9 | 63.0   | 61.7 - 64.4 | 64.7   | 62.1 - 67.2 | 8.8    | 6.8 - 10.9  | 6.4      | 5.2 - 7.6   |
|                | 2005-2009           | 17.5       | 14.9 - 20.0 | 29.5    | 26.9 - 32.1 | 62.7   | 61.3 - 64.0 | 62.5   | 59.8 - 65.3 | 11.6   | 9.6 - 13.6  | 8.2      | 7.0 - 9.3   |
|                | 2010-2014           | 17.0       | 14.5 - 19.5 | 28.9    | 26.4 - 31.4 | 61.7   | 60.3 - 63.1 | 61.0   | 58.4 - 63.7 | 14.8   | 12.6 - 17.0 | 10.1     | 8.9 - 11.4  |
| Tennessee      | 2000-2004           | 19.6       | 16.9 - 22.3 | 26.1    | 23.5 - 28.7 | 69.5   | 68.3 - 70.7 | 65.8   | 63.3 - 68.2 | 10.4   | 8.1 - 12.7  | 8.2      | 7.0 - 9.4   |
|                | 2005-2009           | 17.8       | 15.6 - 20.0 | 30.2    | 27.8 - 32.6 | 66.2   | 65.1 - 67.4 | 65.9   | 63.6 - 68.1 | 14.0   | 11.9 - 16.0 | 9.1      | 8.0 - 10.2  |
|                | 2010-2014           | 17.8       | 14.4 - 21.3 | 31.2    | 27.4 - 34.9 | 64.7   | 62.8 - 66.6 | 63.9   | 60.5 - 67.4 | 14.0   | 11.0 - 17.1 | 10.4     | 8.5 - 12.4  |
| Texas          | 2000-2004           | 15.9       | 14.6 - 17.2 | 24.9    | 23.6 - 26.1 | 63.0   | 62.3 - 63.7 | 62.0   | 60.7 - 63.2 | 11.9   | 11.0 - 12.9 | 9.4      | 8.7 - 10.1  |
|                | 2005-2009           | 19.3       | 17.9 - 20.6 | 28.2    | 27.0 - 29.4 | 64.6   | 63.9 - 65.3 | 62.2   | 61.0 - 63.5 | 14.6   | 13.8 - 15.5 | 10.7     | 10.0 - 11.3 |
|                | 2010-2014           | 21.6       | 20.0 - 23.2 | 30.3    | 28.9 - 31.6 | 64.2   | 63.5 - 65.0 | 63.2   | 61.9 - 64.6 | 17.6   | 16.6 - 18.6 | 13.5     | 12.7 - 14.3 |
| Utah           | 2000-2004           | 19.5       | 14.5 - 24.5 | 30.2    | 25.3 - 35.1 | 65.7   | 63.3 - 68.1 | 67.4   | 63.5 - 71.4 | 9.7    | 6.1 - 13.3  | 6.7      | 4.7 - 8.6   |
|                | 2005-2009           | 20.8       | 16.1 - 25.4 | 28.6    | 23.9 - 33.2 | 66.1   | 63.7 - 68.4 | 62.0   | 57.8 - 66.2 | 13.7   | 10.2 - 17.2 | 8.6      | 6.6 - 10.6  |
|                | 2010-2014           | 17.0       | 12.9 - 21.1 | 29.0    | 24.5 - 33.6 | 64.4   | 62.0 - 66.8 | 63.1   | 58.9 - 67.3 | 14.5   | 11.2 - 17.8 | 8.7      | 6.7 - 10.7  |
| Vermont        | 2000-2004           | 17.6       | 11.1 - 24.0 | 26.2    | 19.2 - 33.2 | 67.4   | 64.0 - 70.7 | 67.1   | 60.6 - 73.6 | 8.8    | 3.6 - 13.9  | 6.5      | 3.8 - 9.1   |
|                | 2005-2009           | 24.4       | 18.4 - 30.5 | 22.4    | 15.7 - 29.1 | 66.3   | 62.8 - 69.8 | 67.6   | 61.4 - 73.9 | 13.0   | 8.2 - 17.7  | 7.4      | 4.9 - 9.8   |
|                | 2010-2014           | 25.0       | 18.0 - 32.0 | 18.8    | 12.1 - 25.4 | 66.4   | 62.4 - 70.5 | 60.7   | 54.5 - 67.0 | 16.9   | 10.7 - 23.0 | 10.8     | 7.2 - 14.4  |
| Washington     | 2000-2004           | 23.1       | 20.6 - 25.5 | 26.9    | 24.6 - 29.2 | 67.6   | 66.4 - 68.8 | 67.5   | 65.4 - 69.6 | 12.8   | 11.0 - 14.6 | 6.5      | 5.5 - 7.5   |
|                | 2005-2009           | 22.8       | 20.0 - 25.5 | 29.6    | 27.0 - 32.2 | 69.5   | 68.1 - 70.8 | 68.7   | 66.4 - 71.1 | 18.1   | 16.1 - 20.1 |          |             |

**Web-table 4.1: Age-standardised five-year net survival (NS, %): adults (15-99 years) diagnosed with cancer of the oesophagus, stomach, colon, rectum, liver or pancreas, by continent, country, registry and calendar period of diagnosis (2000-2004, 2005-2009, 2010-2014)**

|                      | Period of diagnosis | Oesophagus |             | Stomach |             | Colon  |             | Rectum |             | Liver  |             | Pancreas |             |
|----------------------|---------------------|------------|-------------|---------|-------------|--------|-------------|--------|-------------|--------|-------------|----------|-------------|
|                      |                     | NS (%)     | 95% CI      | NS (%)  | 95% CI      | NS (%) | 95% CI      | NS (%) | 95% CI      | NS (%) | 95% CI      | NS (%)   | 95% CI      |
| Changle              | 2000-2004           | 11.0       | 5.6 - 16.3  | 26.0    | 22.6 - 29.5 | 42.5   | 27.1 - 57.9 | 42.9 § | 29.5 - 56.4 | 8.5    | 5.3 - 11.8  | 4.0      | 0.0 - 10.1  |
|                      | 2005-2009           | 21.0       | 16.4 - 25.6 | 31.3    | 29.0 - 33.6 | 56.3   | 46.8 - 65.7 | 47.0   | 38.0 - 55.9 | 13.3   | 10.5 - 16.2 | 20.4     | 11.1 - 29.6 |
|                      | 2010-2014           | 23.2       | 17.7 - 28.7 | 38.8    | 36.0 - 41.6 | 59.3   | 49.7 - 68.9 | 53.7   | 44.1 - 63.3 | 15.7   | 12.1 - 19.4 | 14.5     | 6.9 - 22.1  |
| Cixian               | 2000-2004           | 25.3       | 22.1 - 28.6 | 22.0    | 17.7 - 26.4 | 27.3   | 12.9 - 41.6 | 27.7   | 13.1 - 42.3 | 10.4   | 5.9 - 14.9  | 35.5     | 14.9 - 56.1 |
|                      | 2005-2009           | 31.9       | 29.7 - 34.2 | 30.7    | 27.8 - 33.6 | 27.7   | 18.5 - 36.9 | 33.0   | 24.6 - 41.5 | 8.9    | 5.9 - 11.8  | 15.8     | 5.7 - 25.9  |
|                      | 2010-2014           | 30.7       | 28.2 - 33.1 | 32.0    | 28.7 - 35.2 | 38.6   | 27.2 - 50.1 | 47.5   | 34.5 - 60.6 | 8.7    | 5.7 - 11.7  | 16.9     | 6.5 - 27.3  |
| Dafeng               | 2000-2004           | 21.0       | 16.4 - 25.6 | 23.8    | 19.2 - 28.3 | 28.4   | 9.4 - 47.5  | 16.6   | 4.8 - 28.3  | 9.6    | 3.7 - 15.5  | 11.8     | 0.4 - 23.3  |
|                      | 2005-2009           | 30.3       | 27.4 - 33.2 | 32.4    | 29.8 - 35.1 | 57.8   | 48.7 - 66.9 | 51.9   | 44.4 - 59.4 | 8.6    | 6.7 - 10.5  | 8.4      | 4.9 - 11.9  |
|                      | 2010-2014           | 35.0       | 31.4 - 38.5 | 38.3    | 35.1 - 41.5 | 59.4   | 50.5 - 68.4 | 60.3   | 52.9 - 67.8 | 14.7   | 11.5 - 17.8 | 11.1     | 7.1 - 15.1  |
| Dalian               | 2000-2004           | 38.2       | 31.2 - 45.2 | 51.0    | 47.6 - 54.5 | 67.1   | 61.9 - 72.3 | 66.9   | 61.4 - 72.5 | 32.6   | 28.8 - 36.4 | 26.6     | 21.5 - 31.6 |
|                      | 2005-2009           | 30.5       | 26.8 - 34.2 | 47.9    | 46.2 - 49.7 | 66.2   | 63.6 - 68.8 | 67.1   | 64.4 - 69.8 | 19.4   | 17.7 - 21.1 | 14.8     | 12.3 - 17.3 |
|                      | 2010-2014           | 28.0       | 24.2 - 31.7 | 47.7    | 45.8 - 49.7 | 66.3   | 63.7 - 68.9 | 69.6   | 66.9 - 72.3 | 22.0 § | 19.9 - 24.2 | 9.8      | 7.7 - 11.9  |
| Donghai              | 2000-2004           | 17.7       | 6.3 - 29.0  | 10.4    | 4.4 - 16.5  | 22.5   | 3.0 - 42.0  | 19.4   | 1.4 - 37.5  | 4.2    | 1.4 - 7.1   | -        | -           |
|                      | 2005-2009           | 20.1       | 17.2 - 22.9 | 20.7    | 18.3 - 23.1 | 28.3   | 22.8 - 33.8 | 35.3   | 29.4 - 41.3 | 12.0   | 10.0 - 14.1 | 22.8     | 14.9 - 30.6 |
|                      | 2010-2014           | 19.0       | 15.6 - 22.3 | 21.0    | 18.4 - 23.6 | 41.1   | 34.0 - 48.2 | 41.9   | 35.5 - 48.4 | 13.5   | 11.2 - 15.9 | 17.2     | 11.7 - 22.6 |
| Feicheng             | 2000-2004           | 15.7       | 13.5 - 17.9 | 12.7    | 9.7 - 15.8  | 33.2   | 18.9 - 47.5 | 31.4   | 19.6 - 43.2 | 5.5    | 2.9 - 8.1   | 12.3     | 0.5 - 24.1  |
|                      | 2005-2009           | 21.2       | 19.6 - 22.7 | 19.8    | 17.8 - 21.8 | 33.5   | 23.7 - 43.2 | 27.5   | 21.9 - 33.1 | 5.7    | 4.0 - 7.5   | 6.5      | 1.6 - 11.3  |
|                      | 2010-2014           | 26.6       | 24.7 - 28.4 | 22.8    | 20.4 - 25.1 | 35.8   | 26.1 - 45.4 | 42.3   | 34.7 - 49.9 | 7.7    | 5.2 - 10.1  | 6.7      | 2.1 - 11.4  |
| Ganyu                | 2000-2004           | 13.0       | 9.9 - 16.0  | 9.6     | 5.7 - 13.4  | 43.8   | 22.6 - 65.0 | 19.0   | 11.1 - 26.9 | 1.6    | 0.2 - 3.0   | 5.9      | 0.0 - 12.1  |
|                      | 2005-2009           | 16.9       | 14.9 - 18.9 | 19.7    | 16.8 - 22.7 | 36.2   | 26.5 - 45.8 | 23.9   | 19.2 - 28.6 | 7.2    | 5.3 - 9.1   | 8.8      | 4.1 - 13.4  |
|                      | 2010-2014           | 18.2       | 16.0 - 20.3 | 19.0    | 16.1 - 22.0 | 41.6   | 32.3 - 50.9 | 37.1   | 31.4 - 42.7 | 7.9    | 5.9 - 9.9   | 7.5      | 3.7 - 11.3  |
| Guanyun              | 2000-2004           | 25.6       | 18.9 - 32.3 | 38.3    | 29.1 - 47.5 | 29.0   | 8.7 - 49.3  | 46.7   | 31.8 - 61.7 | 25.8   | 18.2 - 33.4 | 37.3 §   | 11.8 - 62.8 |
|                      | 2005-2009           | 20.5       | 18.0 - 23.0 | 19.7    | 17.0 - 22.4 | 52.0   | 42.9 - 61.1 | 32.3   | 26.6 - 37.9 | 6.6    | 4.9 - 8.3   | 13.2     | 7.7 - 18.7  |
|                      | 2010-2014           | 21.7       | 18.8 - 24.6 | 22.6    | 19.4 - 25.7 | 59.9   | 49.6 - 70.2 | 43.5   | 35.8 - 51.2 | 6.5    | 4.9 - 8.1   | 20.6     | 12.4 - 28.9 |
| Haimen               | 2000-2004           | 13.6       | 10.1 - 17.1 | 23.2    | 20.1 - 26.2 | 43.5   | 35.3 - 51.7 | 40.3   | 33.9 - 46.6 | 3.2    | 2.0 - 4.4   | 5.9      | 2.7 - 9.1   |
|                      | 2005-2009           | 18.0       | 15.4 - 20.5 | 29.1    | 27.1 - 31.1 | 56.7   | 52.0 - 61.4 | 48.6   | 44.1 - 53.1 | 6.6    | 5.5 - 7.7   | 7.9      | 5.6 - 10.3  |
|                      | 2010-2014           | 23.6       | 20.1 - 27.1 | 35.6    | 33.1 - 38.0 | 60.7   | 56.0 - 65.4 | 54.2   | 48.7 - 59.7 | 14.2   | 12.1 - 16.2 | 8.0      | 5.3 - 10.6  |
| Haining              | 2000-2004           | 15.5       | 8.4 - 22.7  | 28.0    | 22.0 - 34.1 | 57.6   | 45.8 - 69.3 | 64.5   | 47.5 - 81.6 | 11.4   | 7.3 - 15.6  | 19.2     | 11.2 - 27.3 |
|                      | 2005-2009           | 20.4       | 16.1 - 24.7 | 32.6    | 28.2 - 37.0 | 56.1   | 49.8 - 62.4 | 59.9   | 52.0 - 67.8 | 10.1   | 7.6 - 12.5  | 6.7      | 4.1 - 9.4   |
|                      | 2010-2014           | 20.1       | 14.7 - 25.4 | 30.1    | 25.9 - 34.4 | 63.9   | 57.6 - 70.3 | 65.6   | 58.2 - 72.9 | 11.9   | 9.0 - 14.8  | 4.4      | 2.1 - 6.6   |
| Jianhu               | 2000-2004           | 28.0       | 24.1 - 31.9 | 29.9    | 26.4 - 33.4 | 53.6   | 29.9 - 77.3 | 42.8   | 27.4 - 58.2 | 4.5    | 2.1 - 7.0   | 9.2      | 0.6 - 17.7  |
|                      | 2005-2009           | 33.1       | 30.8 - 35.5 | 34.5    | 32.5 - 36.5 | 58.4   | 43.8 - 73.0 | 33.6   | 25.5 - 41.6 | 11.4   | 9.0 - 13.9  | 6.4      | 3.2 - 9.6   |
|                      | 2010-2014           | 39.8       | 36.9 - 42.6 | 38.2    | 35.9 - 40.5 | 54.6   | 41.5 - 67.7 | 34.2   | 26.0 - 42.4 | 13.7   | 10.9 - 16.4 | 13.1     | 8.4 - 17.9  |
| Jiashan              | 2000-2004           | 10.0       | 5.6 - 14.4  | 22.8    | 18.4 - 27.3 | 46.1   | 36.6 - 55.5 | 46.4   | 33.7 - 59.0 | 7.8    | 4.5 - 11.1  | 6.2      | 2.1 - 10.2  |
|                      | 2005-2009           | 18.3       | 14.2 - 22.3 | 32.0    | 28.3 - 35.7 | 56.4   | 50.8 - 61.9 | 54.8   | 48.3 - 61.3 | 9.2    | 6.9 - 11.4  | 4.8      | 2.5 - 7.1   |
|                      | 2010-2014           | 20.6       | 15.2 - 26.0 | 37.7    | 33.4 - 42.1 | 57.7   | 52.2 - 63.3 | 58.9   | 51.8 - 66.0 | 15.2   | 11.6 - 18.8 | 3.3      | 1.1 - 5.4   |
| Jintan               | 2000-2004           | 25.4       | 20.6 - 30.3 | 34.1    | 29.9 - 38.3 | 39.0   | 29.9 - 48.1 | 28.4 § | 14.6 - 42.3 | 5.2    | 2.1 - 8.2   | 11.1     | 1.1 - 21.1  |
|                      | 2005-2009           | 27.1       | 24.0 - 30.2 | 32.2    | 29.8 - 34.7 | 56.1   | 46.7 - 65.6 | 50.4   | 42.4 - 58.3 | 11.5   | 7.9 - 15.0  | 16.4     | 9.1 - 23.7  |
|                      | 2010-2014           | 26.7       | 23.3 - 30.1 | 32.4    | 29.6 - 35.2 | 57.3   | 48.7 - 65.9 | 50.1   | 41.5 - 58.8 | 12.7   | 8.5 - 17.0  | 17.0     | 10.7 - 23.2 |
| Lianyungang          | 2000-2004           | -          | -           | -       | -           | -      | -           | -      | -           | -      | -           | -        | -           |
|                      | 2005-2009           | 23.1       | 18.0 - 28.2 | 29.7    | 24.4 - 35.0 | 47.7 § | 38.5 - 56.8 | 46.6 § | 37.6 - 55.6 | 17.6   | 11.9 - 23.3 | 11.6     | 4.1 - 19.1  |
|                      | 2010-2014           | 28.0       | 22.8 - 33.2 | 35.2    | 30.9 - 39.6 | 46.8 § | 37.4 - 56.2 | 46.1 § | 37.3 - 54.9 | 20.8   | 16.6 - 24.9 | 13.1     | 7.4 - 18.9  |
| Linzhou              | 2000-2004           | 23.4       | 20.9 - 26.0 | 25.3    | 21.5 - 29.1 | 36.5   | 22.1 - 50.9 | 33.4   | 23.8 - 42.9 | 1.9    | 0.2 - 3.6   | 5.3      | 0.0 - 13.4  |
|                      | 2005-2009           | 31.4       | 29.6 - 33.2 | 26.1    | 24.3 - 27.9 | 45.0   | 35.8 - 54.2 | 39.5   | 32.8 - 46.2 | 3.0    | 1.7 - 4.4   | 10.5     | 4.1 - 17.0  |
|                      | 2010-2014           | 37.4       | 35.3 - 39.6 | 32.5    | 30.3 - 34.7 | 54.8   | 46.4 - 63.2 | 52.4   | 43.7 - 61.1 | 9.3    | 5.2 - 13.4  | 11.1     | 4.0 - 18.3  |
| Qidong               | 2000-2004           | 10.8       | 7.2 - 14.4  | 21.4    | 18.3 - 24.4 | 42.1   | 34.1 - 50.2 | 32.0   | 26.0 - 38.0 | 5.1    | 3.8 - 6.5   | 5.6      | 2.8 - 8.3   |
|                      | 2005-2009           | 12.2       | 9.6 - 14.8  | 25.2    | 23.3 - 27.1 | 46.1   | 41.4 - 50.9 | 37.2   | 33.7 - 40.7 | 7.0    | 6.1 - 8.0   | 4.6      | 2.9 - 6.3   |
|                      | 2010-2014           | 24.3       | 19.5 - 29.0 | 28.6    | 26.2 - 30.9 | 52.7   | 47.1 - 58.3 | 45.5   | 41.4 - 49.6 | 11.7   | 10.1 - 13.3 | 5.1      | 3.0 - 7.3   |
| Sihui                | 2000-2004           | 6.5        | 0.0 - 14.2  | 31.4    | 18.9 - 43.9 | 25.4   | 12.0 - 38.8 | 32.8   | 16.4 - 49.2 | 4.7    | 1.4 - 8.1   | -        | -           |
|                      | 2005-2009           | 11.0       | 5.5 - 16.5  | 17.2    | 11.2 - 23.2 | 33.2   | 25.4 - 40.9 | 38.3   | 29.1 - 47.6 | 5.0    | 3.3 - 6.8   | 12.9     | 2.8 - 23.0  |
|                      | 2010-2014           | 13.6       | 6.9 - 20.2  | 17.3    | 11.8 - 22.8 | 39.3   | 30.9 - 47.7 | 34.9   | 26.3 - 43.4 | 6.8    | 4.1 - 9.6   | 12.6     | 2.1 - 23.1  |
| Taixing              | 2000-2004           | 15.4       | 13.1 - 17.6 | 18.9    | 16.3 - 21.4 | 23.0   | 14.9 - 31.2 | 24.6   | 16.2 - 33.0 | 5.2    | 3.6 - 6.8   | 6.7      | 2.7 - 10.6  |
|                      | 2005-2009           | 29.5 §     | 27.3 - 31.8 | 35.5 §  | 32.8 - 38.2 | 43.1 § | 34.1 - 52.2 | 44.2 § | 35.2 - 53.2 | 6.9 §  | 5.4 - 8.5   | 11.2 §   | 6.2 - 16.2  |
|                      | 2010-2014           | 34.8 §     | 32.2 - 37.3 | 36.0 §  | 33.2 - 38.7 | 48.9 § | 40.4 - 57.4 | 46.2 § | 38.1 - 54.2 | 11.9 § | 9.8 - 14.0  | 6.7 §    | 3.5 - 10.0  |
| Yangzhong            | 2000-2004           | 52.9       | 47.9 - 57.8 | 59.1    | 53.9 - 64.4 | 84.0   | 70.8 - 97.3 | 64.1   | 49.6 - 78.5 | 26.7   | 19.0 - 34.5 | 31.7     | 16.4 - 47.1 |
|                      | 2005-2009           | 69.9       | 66.1 - 73.8 | 72.8    | 69.6 - 76.0 | 78.2   | 67.3 - 89.1 | 80.0   | 70.4 - 89.6 | 24.5   | 19.1 - 30.0 | 21.8     | 8.1 - 35.5  |
|                      | 2010-2014           | 72.8       | 68.4 - 77.1 | 72.8    | 69.2 - 76.4 | 79.4   | 68.9 - 90.0 | 83.1   | 72.7 - 93.4 | 38.7   | 31.4 - 46.0 | 22.3     | 7.0 - 37.5  |
| Zhongshan            | 2000-2004           | 23.4       | 16.7 - 30.1 | 36.0    | 29.3 - 42.7 | 46.9   | 40.5 - 53.4 | 50.1   | 42.7 - 57.6 | 13.2   | 9.9 - 16.5  | 15.8     | 9.2 - 22.5  |
|                      | 2005-2009           | 17.0       | 13.6 - 20.4 | 31.4    | 26.9 - 35.9 | 58.4   | 54.3 - 62.4 | 55.3   | 50.4 - 60.2 | 12.9   | 10.9 - 14.9 | 11.1     | 7.3 - 14.9  |
|                      | 2010-2014           | 11.7       | 9.1 - 14.3  | 24.9    | 20.5 - 29.3 | 57.3   | 53.1 - 61.5 | 53.1   | 48.2 - 58.1 | 12.6   | 10.3 - 14.8 | 11.8     | 7.9 - 15.7  |
| Cyprus *             | 2000-2004           | -          | -           | 36.6    | 22.2 - 51.1 | 70.7 § | 61.8 - 79.6 | 61.9 § | 43.0 - 80.8 | 8.4 §  | 0.0 - 21.0  | 12.8 §   | 1.7 - 23.9  |
|                      | 2005-2009           | 47.2 §     | 30.5 - 63.8 | 28.1 §  | 22.9 - 33.3 | 67.6 § | 63.9 - 71.4 | 78.3 § | 71.3 - 85.4 | 13.3 § | 6.3 - 20.2  | 8.0 §    | 4.5 - 11.6  |
|                      | 2010-2014           | 39.0 §     | 21.8 - 56.3 | 35.6 §  | 30.0 - 41.2 | 72.1 § | 68.5 - 75.8 | 75.9 § | 69.6 - 82.2 | 10.6 § | 5.8 - 15.5  | 11.6 §   | 7.7 - 15.5  |
| Hong Kong *          | 2000-2004           | -          | -           | -       | -           | -      | -           | -      | -           | -      | -           | -        | -           |
|                      | 2005-2009           | -          | -           | -       | -           | 56.1   | 55.1 - 57.1 | 57.3   | 55.8 - 58.7 | -      | -           | -        | -           |
|                      | 2010-2014           | -          | -           | -       | -           | 56.4   | 55.4 - 57.3 | 58.0   | 56.6 - 59.4 | -      | -           | -        | -           |
| India (2 registries) | 2000-2004           | 2.9        | 0.0 - 6.4   | 6.4     | 2.5 - 10.3  | 46.9   | 31.9 - 61.8 | 36.9   | 16.1 - 57.8 | 2.4    | 0.0 - 6.0   | 4.2      | 0.0 - 10.5  |
|                      | 2005-2009           | 3.4        | 0.7 - 6.0   | 9.8     | 3.4 - 16.3  | 33.8   | 21.1 - 46.4 | 33.6   | 20.8 - 46.3 | 3.7    | 0.0 - 7.7   | 5.3      | 0.0 - 11.4  |
|                      | 2010-2014           | 4.1        | 0.0 - 8.5   | 8.9     | 4.0 - 13.9  | 38.9   | 24.6 - 53.3 | 30.0   | 20.5 - 39.5 | 6.3    | 0.6 - 11.9  | 5.6      | 0.0 - 11.6  |
| Guwahati             | 2000-2004           | -          | -           | -       | -           | -      | -           | -      | -           | -      | -           | -        | -           |
|                      | 2005-2009           | -          | -           | -       | -           | -      | -           | -      | -           | -      | -           | -        | -           |
|                      | 2010-2014           | -          | -           | -       | -           | -      | -           | -      | -           | -      | -           | -        | -           |
| Karunagappally       | 2000-2004           | 2.9        | 0.0 - 6.4   |         |             |        |             |        |             |        |             |          |             |

**Web-table 4.1: Age-standardised five-year net survival (NS, %): adults (15-99 years) diagnosed with cancer of the oesophagus, stomach, colon, rectum, liver or pancreas, by continent, country, registry and calendar period of diagnosis (2000-2004, 2005-2009, 2010-2014)**

|                            | Period of diagnosis | Oesophagus |             | Stomach |             | Colon  |             | Rectum |             | Liver  |             | Pancreas |             |
|----------------------------|---------------------|------------|-------------|---------|-------------|--------|-------------|--------|-------------|--------|-------------|----------|-------------|
|                            |                     | NS (%)     | 95% CI      | NS (%)  | 95% CI      | NS (%) | 95% CI      | NS (%) | 95% CI      | NS (%) | 95% CI      | NS (%)   | 95% CI      |
| Japan<br>(16 registries)   | 2000-2004           | 27.7       | 26.4 - 29.0 | 50.5    | 50.0 - 50.9 | 63.4   | 62.7 - 64.0 | 58.6   | 57.6 - 59.5 | 25.7 § | 25.1 - 26.3 | 6.9 §    | 6.4 - 7.4   |
|                            | 2005-2009           | 33.3       | 32.3 - 34.2 | 57.6    | 57.3 - 57.9 | 66.8   | 66.3 - 67.3 | 64.0   | 63.3 - 64.6 | 28.6 § | 28.1 - 29.1 | 7.6 §    | 7.2 - 7.9   |
|                            | 2010-2014           | 36.0       | 34.8 - 37.3 | 60.3    | 59.9 - 60.7 | 67.8   | 67.3 - 68.4 | 64.8   | 64.0 - 65.7 | 30.1 § | 29.5 - 30.6 | 8.3 §    | 7.8 - 8.7   |
| Aichi                      | 2000-2004           | 21.6 §     | 18.5 - 24.7 | 48.3 §  | 47.0 - 49.7 | 59.3 § | 57.6 - 61.0 | 58.9 § | 56.3 - 61.5 | 21.6 § | 19.8 - 23.3 | 6.2 §    | 4.7 - 7.8   |
|                            | 2005-2009           | 27.5       | 25.6 - 29.5 | 51.3    | 50.5 - 52.1 | 62.5   | 61.6 - 63.5 | 61.5   | 60.1 - 62.9 | 23.0 § | 21.8 - 24.2 | 6.5 §    | 5.6 - 7.4   |
|                            | 2010-2014           | 30.2       | 28.1 - 32.3 | 55.3    | 54.5 - 56.2 | 66.0   | 65.0 - 67.0 | 64.2   | 62.8 - 65.7 | 25.6 § | 24.2 - 27.0 | 7.6 §    | 6.5 - 8.6   |
| Akita                      | 2000-2004           | -          | -           | -       | -           | -      | -           | -      | -           | -      | -           | -        | -           |
|                            | 2005-2009           | -          | -           | -       | -           | -      | -           | -      | -           | -      | -           | -        | -           |
|                            | 2010-2014           | 20.5 §     | 15.5 - 25.5 | 21.1 §  | 18.5 - 23.8 | 25.4 § | 20.8 - 29.9 | 28.9 § | 21.6 - 36.2 | 19.7 § | 15.0 - 24.4 | 3.4      | 1.9 - 5.0   |
| Ehime                      | 2000-2004           | -          | -           | -       | -           | -      | -           | -      | -           | -      | -           | -        | -           |
|                            | 2005-2009           | 39.2 §     | 34.0 - 44.3 | 66.7 §  | 64.8 - 68.6 | 69.7 § | 67.1 - 72.3 | 67.6 § | 64.0 - 71.3 | 38.2 § | 35.5 - 41.0 | 9.3 §    | 7.0 - 11.6  |
|                            | 2010-2014           | 43.1 §     | 37.6 - 48.7 | 65.3 §  | 63.0 - 67.6 | 71.0 § | 67.8 - 74.1 | 66.4 § | 61.0 - 71.8 | 43.3 § | 39.5 - 47.2 | 11.1 §   | 7.6 - 14.7  |
| Fukui                      | 2000-2004           | 36.3       | 28.9 - 43.6 | 64.5    | 61.7 - 67.3 | 62.7   | 58.4 - 67.0 | 61.8   | 56.0 - 67.6 | 27.5   | 23.5 - 31.5 | 6.3      | 3.6 - 9.0   |
|                            | 2005-2009           | 37.4       | 32.0 - 42.8 | 65.9    | 64.1 - 67.8 | 67.1   | 64.4 - 69.8 | 67.1   | 63.3 - 70.9 | 25.5   | 22.4 - 28.6 | 7.6      | 5.4 - 9.7   |
|                            | 2010-2014           | -          | -           | -       | -           | -      | -           | -      | -           | -      | -           | -        | -           |
| Gunma                      | 2000-2004           | 14.0 §     | 7.1 - 21.0  | 27.0 §  | 23.2 - 30.8 | 35.2 § | 29.6 - 40.7 | 36.8 § | 29.4 - 44.1 | 36.5 § | 31.0 - 42.0 | 3.9 §    | 0.8 - 7.1   |
|                            | 2005-2009           | 24.9 §     | 21.9 - 27.9 | 48.3 §  | 46.7 - 49.9 | 57.9 § | 56.0 - 59.9 | 52.0 § | 49.2 - 54.7 | 21.1 § | 18.8 - 23.4 | 5.3 §    | 3.8 - 6.8   |
|                            | 2010-2014           | 25.9 §     | 22.1 - 29.7 | 52.2 §  | 50.3 - 54.1 | 58.9 § | 56.6 - 61.2 | 56.9 § | 53.7 - 60.2 | 20.2 § | 17.2 - 23.2 | 4.4 §    | 2.6 - 6.1   |
| Hiroshima                  | 2000-2004           | 33.1       | 27.8 - 38.5 | 63.4    | 61.0 - 65.7 | 73.2   | 70.3 - 76.0 | 66.7   | 62.6 - 70.7 | 34.4 § | 31.0 - 37.8 | 6.9 §    | 4.3 - 9.6   |
|                            | 2005-2009           | 39.2       | 36.1 - 42.3 | 65.3    | 64.3 - 66.4 | 72.3   | 71.0 - 73.6 | 70.9   | 68.9 - 72.8 | 34.9   | 33.2 - 36.5 | 10.1     | 8.5 - 11.7  |
|                            | 2010-2014           | -          | -           | -       | -           | -      | -           | -      | -           | -      | -           | -        | -           |
| Hyogo                      | 2000-2004           | -          | -           | -       | -           | -      | -           | -      | -           | -      | -           | -        | -           |
|                            | 2005-2009           | 31.2 §     | 28.6 - 33.7 | 55.0 §  | 53.8 - 56.3 | 61.7 § | 60.1 - 63.3 | 59.2 § | 56.7 - 61.6 | 30.2 § | 28.4 - 32.0 | 9.2 §    | 7.6 - 10.8  |
|                            | 2010-2014           | 39.7 §     | 35.9 - 43.5 | 65.3 §  | 63.7 - 66.9 | 73.1 § | 71.2 - 74.9 | 70.5 § | 67.7 - 73.3 | 39.8 § | 33.4 - 46.2 | 9.5 §    | 7.1 - 11.9  |
| Ibaraki                    | 2000-2004           | -          | -           | -       | -           | -      | -           | -      | -           | -      | -           | -        | -           |
|                            | 2005-2009           | 28.6 §     | 25.7 - 31.5 | 56.9 §  | 55.6 - 58.2 | 65.4 § | 63.8 - 67.1 | 60.0 § | 57.6 - 62.5 | 25.5 § | 23.3 - 27.7 | 6.0 §    | 4.6 - 7.4   |
|                            | 2010-2014           | 44.7 §     | 40.5 - 48.9 | 67.3 §  | 65.6 - 69.0 | 75.6 § | 72.8 - 78.5 | 71.5 § | 67.8 - 75.2 | 46.9 § | 43.2 - 50.6 | 17.2 §   | 14.5 - 20.0 |
| Kanagawa                   | 2000-2004           | 32.7 §     | 30.8 - 34.5 | 44.4    | 43.8 - 45.1 | 74.1 § | 73.2 - 75.1 | 67.3 § | 65.9 - 68.8 | 27.1 § | 25.8 - 28.4 | 9.9 §    | 8.7 - 11.0  |
|                            | 2005-2009           | 36.3 §     | 34.5 - 38.1 | 50.6    | 49.9 - 51.2 | 73.1 § | 72.3 - 73.9 | 68.2 § | 66.9 - 69.5 | 32.3 § | 31.0 - 33.6 | 9.2 §    | 8.2 - 10.2  |
|                            | 2010-2014           | 38.9 §     | 37.0 - 40.9 | 55.8    | 55.0 - 56.5 | 71.8 § | 71.0 - 72.6 | 67.7 § | 66.4 - 69.1 | 33.0 § | 31.6 - 34.5 | 10.0 §   | 8.9 - 11.1  |
| Miyagi                     | 2000-2004           | 39.1       | 36.4 - 41.9 | 66.3    | 65.1 - 67.4 | 67.7   | 66.2 - 69.2 | 63.2   | 60.9 - 65.4 | 23.5 § | 21.5 - 25.5 | 7.3 §    | 5.8 - 8.9   |
|                            | 2005-2009           | 38.2       | 35.2 - 41.1 | 68.6    | 67.3 - 69.8 | 70.1   | 68.6 - 71.7 | 66.9   | 64.4 - 69.3 | 27.6 § | 25.1 - 30.2 | 7.2 §    | 5.6 - 8.8   |
|                            | 2010-2014           | 36.3       | 31.2 - 41.4 | 71.2    | 68.6 - 73.7 | 73.3   | 70.2 - 76.3 | 69.5   | 64.5 - 74.5 | 31.5 § | 25.8 - 37.1 | 4.8 §    | 2.7 - 6.9   |
| Niigata                    | 2000-2004           | 35.9 §     | 33.3 - 38.5 | 67.2 §  | 66.1 - 68.2 | 75.6   | 74.3 - 76.9 | 69.5   | 67.4 - 71.6 | 27.9 § | 25.5 - 30.3 | 7.6 §    | 6.0 - 9.2   |
|                            | 2005-2009           | 41.7       | 39.5 - 43.9 | 68.3    | 67.4 - 69.3 | 74.2   | 73.0 - 75.3 | 70.6   | 68.7 - 72.5 | 28.9   | 26.6 - 31.1 | 6.2 §    | 5.0 - 7.4   |
|                            | 2010-2014           | 40.8       | 37.9 - 43.6 | 68.7    | 67.7 - 69.7 | 71.2   | 69.9 - 72.5 | 67.9   | 65.9 - 70.0 | 29.9   | 27.5 - 32.3 | 6.9 §    | 5.4 - 8.5   |
| Osaka                      | 2000-2004           | 21.7       | 20.2 - 23.1 | 47.0    | 46.4 - 47.7 | 54.7   | 53.7 - 55.6 | 50.7   | 49.3 - 52.0 | 25.2 § | 24.3 - 26.0 | 4.9 §    | 4.2 - 5.6   |
|                            | 2005-2009           | 28.5       | 26.8 - 30.2 | 52.4    | 51.6 - 53.1 | 63.0   | 62.1 - 64.0 | 59.4   | 58.0 - 60.7 | 26.5 § | 25.5 - 27.5 | 6.6 §    | 5.8 - 7.4   |
|                            | 2010-2014           | -          | -           | -       | -           | -      | -           | -      | -           | -      | -           | -        | -           |
| Saga                       | 2000-2004           | -          | -           | -       | -           | -      | -           | -      | -           | -      | -           | -        | -           |
|                            | 2005-2009           | 32.1       | 27.3 - 36.9 | 60.6    | 58.5 - 62.8 | 60.6   | 57.8 - 63.5 | 62.6   | 58.1 - 67.1 | 35.0 § | 31.7 - 38.3 | 6.2      | 4.1 - 8.4   |
|                            | 2010-2014           | 40.0       | 33.2 - 46.9 | 64.1    | 60.5 - 67.6 | 69.8   | 65.6 - 74.1 | 69.2   | 63.0 - 75.3 | 45.1 § | 39.5 - 50.7 | 6.6 §    | 2.9 - 10.3  |
| Tochigi                    | 2000-2004           | -          | -           | -       | -           | -      | -           | -      | -           | -      | -           | -        | -           |
|                            | 2005-2009           | 30.1       | 26.8 - 33.5 | 56.8 §  | 55.3 - 58.4 | 66.2 § | 64.3 - 68.1 | 60.2   | 57.3 - 63.1 | 27.5 § | 25.0 - 30.0 | 6.8 §    | 5.1 - 8.5   |
|                            | 2010-2014           | 44.2       | 39.1 - 49.4 | 60.7 §  | 57.4 - 64.1 | 70.0 § | 67.3 - 72.6 | 69.0   | 65.0 - 73.1 | 33.3 § | 28.9 - 37.7 | 13.0 §   | 10.0 - 16.0 |
| Yamagata                   | 2000-2004           | 36.9       | 31.8 - 42.0 | 64.1    | 62.0 - 66.1 | 69.3   | 66.4 - 72.2 | 70.2   | 65.9 - 74.5 | 22.8 § | 18.5 - 27.0 | 6.7 §    | 4.2 - 9.1   |
|                            | 2005-2009           | 33.2       | 30.1 - 36.2 | 65.3    | 64.0 - 66.6 | 68.6   | 66.8 - 70.4 | 65.9   | 63.0 - 68.8 | 27.2   | 24.3 - 30.2 | 8.8      | 6.6 - 10.9  |
|                            | 2010-2014           | 41.3       | 37.5 - 45.1 | 67.7    | 66.2 - 69.1 | 69.3   | 67.4 - 71.3 | 68.2   | 65.1 - 71.3 | 26.8   | 23.0 - 30.5 | 8.5      | 6.5 - 10.6  |
| Yamanashi                  | 2000-2004           | -          | -           | -       | -           | -      | -           | -      | -           | -      | -           | -        | -           |
|                            | 2005-2009           | 40.6       | 33.4 - 47.8 | 59.2    | 56.0 - 62.4 | 69.1   | 65.5 - 72.7 | 62.3   | 57.0 - 67.6 | 39.1 § | 34.4 - 43.8 | 9.9 §    | 6.4 - 13.5  |
|                            | 2010-2014           | 36.0       | 27.2 - 44.8 | 66.4    | 63.2 - 69.7 | 72.8   | 68.8 - 76.8 | 64.1   | 56.9 - 71.2 | 41.4 § | 36.0 - 46.7 | 8.9 §    | 5.5 - 12.2  |
| Jordan *                   | 2000-2004           | 52.6 §     | 41.3 - 63.9 | 76.1 §  | 69.7 - 82.5 | 86.0 § | 81.6 - 90.5 | 79.9 § | 71.1 - 88.8 | 71.5 § | 58.1 - 84.9 | 66.9 §   | 52.0 - 81.8 |
|                            | 2005-2009           | 53.9 §     | 43.0 - 64.8 | 64.8 §  | 58.4 - 71.3 | 80.8 § | 77.0 - 84.7 | 76.2 § | 67.1 - 85.3 | 64.3 § | 54.5 - 74.1 | 32.5 §   | 25.6 - 39.4 |
|                            | 2010-2014           | 41.1 §     | 30.4 - 51.9 | 55.7 §  | 48.7 - 62.6 | 76.1 § | 72.1 - 80.1 | 73.2 § | 65.0 - 81.4 | 40.0 § | 28.6 - 51.3 | 24.0 §   | 18.7 - 29.3 |
| Korea *                    | 2000-2004           | 18.6       | 17.6 - 19.6 | 48.6    | 48.2 - 48.9 | 60.5   | 59.9 - 61.2 | 60.8   | 60.0 - 61.6 | 15.3   | 15.0 - 15.7 | 7.6      | 7.2 - 8.1   |
|                            | 2005-2009           | 26.9       | 25.8 - 28.0 | 61.1    | 60.8 - 61.5 | 68.1   | 67.6 - 68.6 | 68.1   | 67.5 - 68.7 | 22.4   | 22.1 - 22.8 | 8.4      | 8.0 - 8.9   |
|                            | 2010-2014           | 31.3       | 30.3 - 32.4 | 68.9    | 68.6 - 69.2 | 71.8   | 71.4 - 72.2 | 71.1   | 70.6 - 71.7 | 27.2   | 26.8 - 27.6 | 10.5     | 10.0 - 10.9 |
| Kuwait *                   | 2000-2004           | 17.6 §     | 2.9 - 32.4  | 15.0    | 7.1 - 22.9  | 64.8   | 53.1 - 76.5 | 59.3   | 48.1 - 70.4 | 11.4 § | 3.5 - 19.2  | 11.2 §   | 3.1 - 19.3  |
|                            | 2005-2009           | 9.5        | 0.0 - 20.6  | 13.4    | 7.1 - 19.7  | 50.2   | 42.7 - 57.7 | 53.3   | 42.4 - 64.2 | 12.4   | 5.8 - 19.1  | 7.0      | 3.0 - 11.0  |
|                            | 2010-2014           | 25.4       | 10.5 - 40.4 | 22.4    | 12.6 - 32.3 | 58.5   | 49.4 - 67.7 | 58.2   | 48.5 - 67.9 | 18.6   | 9.8 - 27.3  | 23.6     | 12.0 - 35.2 |
| Malaysia (Penang)          | 2000-2004           | -          | -           | -       | -           | -      | -           | -      | -           | -      | -           | -        | -           |
|                            | 2005-2009           | 13.2       | 6.5 - 19.9  | 23.2    | 17.5 - 29.0 | 54.9   | 49.2 - 60.6 | 37.3   | 30.1 - 44.5 | 6.4    | 3.7 - 9.1   | 8.9      | 4.5 - 13.3  |
|                            | 2010-2014           | 13.7       | 3.8 - 23.6  | 30.0    | 22.9 - 37.0 | 55.9   | 46.1 - 65.8 | 58.0   | 46.6 - 69.4 | 9.6    | 3.9 - 15.2  | 19.0     | 12.0 - 26.0 |
| Mongolia *                 | 2000-2004           | -          | -           | -       | -           | -      | -           | -      | -           | -      | -           | -        | -           |
|                            | 2005-2009           | -          | -           | -       | -           | -      | -           | -      | -           | -      | -           | -        | -           |
|                            | 2010-2014           | -          | -           | -       | -           | -      | -           | -      | -           | -      | -           | -        | -           |
| Qatar *                    | 2000-2004           | 36.1 §     | 10.3 - 61.9 | 15.0 §  | 2.0 - 28.0  | 62.1 § | 50.1 - 74.1 | 67.8 § | 48.7 - 86.9 | 7.1 §  | 2.6 - 11.5  | 9.9 §    | 0.0 - 21.2  |
|                            | 2005-2009           | 33.4 §     | 9.4 - 57.5  | 22.0 §  | 12.2 - 31.7 | 64.3 § | 47.6 - 80.9 | 60.5 § | 46.7 - 74.3 | 10.3 § | 3.2 - 17.3  | 4.2 §    | 0.0 - 10.4  |
|                            | 2010-2014           | 42.2 §     | 9.4 - 75.0  | 17.5 §  | 9.7 - 25.3  | 63.5 § | 51.7 - 75.2 | 43.6 § | 31.2 - 56.1 | 27.2 § | 12.9 - 41.5 | 16.6 §   | 7.2 - 26.1  |
| Singapore *                | 2000-2004           | 9.0        | 6.2 - 11.8  | 25.4    | 23.3 - 27.4 | 56.1   | 54.4 - 57.8 | 51.4   | 48.5 - 54.2 | 13.2   | 11.6 - 14.9 | 5.3      | 3.6 - 7.0   |
|                            | 2005-2009           | 10.5       | 7.4 - 13.5  | 27.1    | 25.0 - 29.2 | 60.3   | 58.7 - 61.8 | 59.0   | 56.3 - 61.8 | 20.4   | 18.6 - 22.2 | 6.7      | 5.1 - 8.3   |
|                            | 2010-2014           | 14.8       | 11.1 - 18.4 | 30.3    | 28.2 - 32.4 | 61.7   | 60.2 - 63.2 | 60.5   | 58.0 - 63.0 | 24.7   | 22.8 - 26.6 | 9.4      | 7.6 - 11.2  |
| Taiwan *                   | 2000-2004           | 13.0       | 12.0 - 13.9 | 35.6    | 34.8 - 36.4 | 56.8   | 56.0 - 57.5 | 57.7   | 56.8 - 58.7 | 19.5   | 19.1 - 19.9 | 7.0      | 6.3 - 7.7   |
|                            | 2005-2009           | 13.2       | 12.3 - 14.1 | 36.7    | 35.9 - 37.5 | 60.4   | 59.8 - 61.0 | 61.5   | 60.6 - 62.3 | 24.4   | 24.0 - 24.8 | 6.5      | 5.9 - 7.1   |
|                            | 2010-2014           | 15.5       | 14.6 - 16.4 | 38.6    | 37.8 - 39.4 | 62.6   | 62.0 - 63.1 | 62.5   | 61.7 - 63.3 | 27.9   | 27.5 - 28.4 | 7.7      | 7.0 - 8.3   |
| Thailand<br>(6 registries) |                     |            |             |         |             |        |             |        |             |        |             |          |             |

**Web-table 4.1: Age-standardised five-year net survival (NS, %): adults (15-99 years) diagnosed with cancer of the oesophagus, stomach, colon, rectum, liver or pancreas, by continent, country, registry and calendar period of diagnosis (2000-2004, 2005-2009, 2010-2014)**

|                        | Period of diagnosis | Oesophagus |             | Stomach |             | Colon  |             | Rectum |             | Liver  |             | Pancreas |             |
|------------------------|---------------------|------------|-------------|---------|-------------|--------|-------------|--------|-------------|--------|-------------|----------|-------------|
|                        |                     | NS (%)     | 95% CI      | NS (%)  | 95% CI      | NS (%) | 95% CI      | NS (%) | 95% CI      | NS (%) | 95% CI      | NS (%)   | 95% CI      |
| Khon Kaen              | 2000-2004           | 23.3 §     | 8.0 - 38.6  | 9.6 §   | 5.8 - 13.5  | 41.1 § | 34.6 - 47.5 | 26.0 § | 18.9 - 33.1 | 11.2   | 9.7 - 12.6  | 13.6     | 4.7 - 22.5  |
|                        | 2005-2009           | 4.8        | 0.0 - 10.0  | 8.5     | 4.1 - 12.8  | 44.3   | 39.1 - 49.4 | 31.9   | 25.8 - 37.9 | 7.6    | 6.5 - 8.8   | 14.0     | 6.2 - 21.9  |
|                        | 2010-2014           | 1.8        | 0.0 - 3.7   | 6.3     | 2.8 - 9.9   | 45.0   | 40.5 - 49.5 | 34.5   | 28.4 - 40.7 | 5.1    | 4.3 - 6.0   | 12.8     | 6.6 - 19.0  |
| Lampang                | 2000-2004           | 19.7       | 8.4 - 31.0  | 14.9    | 9.1 - 20.7  | 50.2   | 41.9 - 58.6 | 34.4   | 26.7 - 42.2 | 11.0 § | 8.2 - 13.7  | 6.4      | 2.0 - 10.8  |
|                        | 2005-2009           | 5.4        | 0.0 - 10.8  | 11.4    | 6.6 - 16.1  | 40.9   | 35.2 - 46.7 | 37.7   | 30.7 - 44.8 | 4.2    | 3.0 - 5.5   | 3.0      | 0.0 - 6.6   |
|                        | 2010-2014           | 2.4        | 0.0 - 6.1   | 7.2     | 4.0 - 10.4  | 44.8   | 39.4 - 50.2 | 38.4   | 31.9 - 45.0 | 5.9    | 4.5 - 7.3   | 1.6      | 0.2 - 3.0   |
| Lamphun                | 2000-2004           | 10.1       | 0.0 - 21.8  | 16.3    | 6.1 - 26.5  | 43.4   | 34.3 - 52.6 | 39.0   | 24.2 - 53.8 | 9.6 §  | 4.6 - 14.7  | 16.5     | 6.3 - 26.7  |
|                        | 2005-2009           | 26.7       | 8.0 - 45.5  | 18.2    | 11.0 - 25.4 | 47.0   | 39.5 - 54.5 | 37.5   | 27.2 - 47.8 | 6.6 §  | 3.7 - 9.4   | 18.8     | 10.5 - 27.1 |
|                        | 2010-2014           | 8.9        | 0.2 - 17.6  | 12.3    | 7.0 - 17.6  | 45.7   | 38.0 - 53.3 | 36.1   | 26.2 - 46.1 | 5.8 §  | 3.5 - 8.2   | 12.3     | 5.2 - 19.4  |
| Lopburi                | 2000-2004           | 8.4        | 2.4 - 14.4  | 28.9    | 20.7 - 37.2 | 43.9   | 36.4 - 51.3 | 27.6   | 19.3 - 35.8 | 6.0    | 3.8 - 8.2   | 4.0      | 0.0 - 8.7   |
|                        | 2005-2009           | 12.4       | 5.2 - 19.6  | 40.1 §  | 31.0 - 49.3 | 48.3 § | 41.0 - 55.6 | 38.9 § | 30.2 - 47.6 | 6.4 §  | 4.4 - 8.5   | 10.4 §   | 2.6 - 18.2  |
|                        | 2010-2014           | 2.6 §      | 0.9 - 4.4   | 38.9 §  | 26.0 - 51.8 | 45.7 § | 38.3 - 53.1 | 39.8 § | 30.3 - 49.3 | 5.9 §  | 4.0 - 7.7   | 8.5 §    | 3.9 - 13.1  |
| Songkhla               | 2000-2004           | 8.1        | 4.4 - 11.8  | 16.0    | 9.1 - 22.9  | 57.0   | 50.1 - 64.0 | 38.2   | 30.1 - 46.2 | 3.7    | 2.0 - 5.4   | 14.7     | 6.0 - 23.5  |
|                        | 2005-2009           | 4.2        | 1.8 - 6.5   | 12.0    | 7.0 - 17.0  | 57.8   | 51.4 - 64.2 | 39.2   | 32.8 - 45.5 | 4.0    | 2.4 - 5.5   | 12.2     | 6.4 - 18.1  |
|                        | 2010-2014           | 4.1        | 1.8 - 6.4   | 11.0    | 5.7 - 16.2  | 55.5   | 49.6 - 61.4 | 51.8   | 44.3 - 59.4 | 7.3    | 5.0 - 9.5   | 15.6     | 9.4 - 21.9  |
| Turkey (9 registries)  | 2000-2004           | 14.8 §     | 9.2 - 20.4  | 21.9 §  | 18.5 - 25.4 | 52.9 § | 49.1 - 56.7 | 48.5   | 43.9 - 53.0 | 20.1 § | 15.0 - 25.2 | 10.9 §   | 7.8 - 14.1  |
|                        | 2005-2009           | 14.7       | 12.9 - 16.5 | 21.4    | 20.3 - 22.4 | 52.7   | 51.3 - 54.2 | 49.3   | 47.3 - 51.3 | 14.9   | 12.9 - 17.0 | 9.5      | 8.4 - 10.7  |
|                        | 2010-2014           | 19.0       | 16.9 - 21.1 | 24.6    | 23.6 - 25.6 | 55.2   | 53.8 - 56.6 | 52.6   | 50.6 - 54.5 | 15.9   | 14.0 - 17.8 | 10.4     | 9.3 - 11.5  |
| Ankara                 | 2000-2004           | -          | -           | -       | -           | -      | -           | -      | -           | -      | -           | -        | -           |
|                        | 2005-2009           | 20.8       | 16.6 - 24.9 | 27.7    | 25.3 - 30.0 | 55.4   | 52.3 - 58.5 | 53.6   | 49.3 - 57.9 | 17.5   | 13.8 - 21.2 | 15.0     | 12.1 - 18.0 |
|                        | 2010-2014           | 22.8       | 17.6 - 28.0 | 30.6    | 28.2 - 33.1 | 63.7   | 60.5 - 66.8 | 60.6   | 55.5 - 65.8 | 18.4   | 13.3 - 23.5 | 15.1     | 12.6 - 17.7 |
| Antalya                | 2000-2004           | -          | -           | -       | -           | -      | -           | -      | -           | -      | -           | -        | -           |
|                        | 2005-2009           | 15.4       | 8.5 - 22.3  | 17.5    | 13.4 - 21.7 | 53.5   | 48.9 - 58.2 | 49.2   | 42.6 - 55.9 | 10.3   | 6.1 - 14.5  | 3.0      | 1.3 - 4.7   |
|                        | 2010-2014           | 10.8       | 1.4 - 20.2  | 32.3    | 26.4 - 38.1 | 54.3   | 47.3 - 61.3 | 58.4   | 49.6 - 67.1 | 10.4   | 6.1 - 14.7  | 9.5      | 6.5 - 12.5  |
| Bursa                  | 2000-2004           | -          | -           | -       | -           | -      | -           | -      | -           | -      | -           | -        | -           |
|                        | 2005-2009           | 7.9        | 3.8 - 11.9  | 13.8    | 11.7 - 15.9 | 42.2   | 38.3 - 46.2 | 39.4   | 34.4 - 44.5 | 5.6 §  | 2.7 - 8.5   | 6.6      | 4.1 - 9.1   |
|                        | 2010-2014           | 16.8       | 11.6 - 21.9 | 13.9    | 10.8 - 17.0 | 54.8   | 49.5 - 60.2 | 45.6   | 39.4 - 51.9 | 5.3 §  | 1.9 - 8.7   | 5.7      | 3.1 - 8.2   |
| Edirne                 | 2000-2004           | -          | -           | -       | -           | -      | -           | -      | -           | -      | -           | -        | -           |
|                        | 2005-2009           | 5.7 §      | 0.0 - 14.2  | 14.6    | 9.8 - 19.4  | 45.6   | 37.9 - 53.4 | 44.3   | 33.4 - 55.1 | 2.4 §  | 0.0 - 6.1   | 1.9 §    | 0.4 - 3.4   |
|                        | 2010-2014           | 13.7 §     | 0.4 - 26.9  | 10.6    | 5.7 - 15.5  | 57.3   | 49.1 - 65.6 | 36.4   | 24.5 - 48.2 | 13.2 § | 3.1 - 23.4  | 7.8 §    | 2.8 - 12.8  |
| Erzurum                | 2000-2004           | -          | -           | -       | -           | -      | -           | -      | -           | -      | -           | -        | -           |
|                        | 2005-2009           | 17.2       | 13.3 - 21.2 | 18.5    | 15.5 - 21.6 | 51.5   | 42.7 - 60.2 | 37.4   | 24.3 - 50.5 | 12.9   | 2.8 - 22.9  | 15.2     | 7.7 - 22.7  |
|                        | 2010-2014           | 26.1       | 20.2 - 32.0 | 16.6    | 12.7 - 20.6 | 50.7   | 40.3 - 61.1 | 32.9   | 16.7 - 49.0 | 14.5   | 4.8 - 24.1  | 10.8     | 3.4 - 18.2  |
| Eskisehir              | 2000-2004           | -          | -           | -       | -           | -      | -           | -      | -           | -      | -           | -        | -           |
|                        | 2005-2009           | 8.5        | 1.6 - 15.5  | 16.9    | 13.0 - 20.9 | 45.1   | 39.2 - 51.0 | 39.5   | 32.2 - 46.8 | 4.1    | 0.0 - 8.4   | 7.6      | 3.8 - 11.4  |
|                        | 2010-2014           | 26.5       | 11.4 - 41.6 | 28.8    | 22.5 - 35.2 | 56.9   | 49.7 - 64.0 | 59.8   | 47.0 - 72.6 | 0.1    | 0.0 - 0.2   | 5.6      | 1.6 - 9.6   |
| Izmir                  | 2000-2004           | 14.8 §     | 9.2 - 20.4  | 21.9 §  | 18.5 - 25.4 | 52.9 § | 49.1 - 56.7 | 48.5   | 43.9 - 53.0 | 20.1 § | 15.0 - 25.2 | 10.9 §   | 7.8 - 14.1  |
|                        | 2005-2009           | 12.2       | 8.9 - 15.4  | 19.7    | 17.8 - 21.6 | 56.1   | 53.6 - 58.6 | 51.2   | 47.7 - 54.7 | 14.7   | 11.6 - 17.9 | 7.6      | 5.7 - 9.4   |
|                        | 2010-2014           | 12.8       | 9.0 - 16.6  | 23.3    | 21.0 - 25.6 | 56.8   | 54.2 - 59.4 | 56.1   | 52.3 - 59.9 | 16.3   | 12.8 - 19.7 | 7.0      | 5.3 - 8.7   |
| Samsun                 | 2000-2004           | -          | -           | -       | -           | -      | -           | -      | -           | -      | -           | -        | -           |
|                        | 2005-2009           | 8.6        | 3.2 - 14.0  | 24.9    | 20.8 - 29.1 | 53.8   | 48.7 - 58.9 | 54.2   | 46.8 - 61.5 | 11.2   | 6.0 - 16.5  | 14.5     | 9.3 - 19.6  |
|                        | 2010-2014           | 31.3       | 22.2 - 40.4 | 21.1    | 16.8 - 25.3 | 60.8   | 53.8 - 67.8 | 51.8   | 43.1 - 60.4 | 13.1   | 8.2 - 18.0  | 7.6      | 3.8 - 11.4  |
| Trabzon                | 2000-2004           | -          | -           | -       | -           | -      | -           | -      | -           | -      | -           | -        | -           |
|                        | 2005-2009           | 13.0       | 2.9 - 23.1  | 23.8    | 20.2 - 27.5 | 47.3   | 41.3 - 53.3 | 47.3   | 39.7 - 54.9 | 21.5   | 12.1 - 31.0 | 6.3      | 2.5 - 10.0  |
|                        | 2010-2014           | 13.5       | 0.3 - 26.7  | 23.4    | 18.1 - 28.7 | 57.7   | 50.3 - 65.2 | 44.5   | 35.2 - 53.8 | 7.7    | 0.0 - 17.3  | 12.3     | 3.7 - 20.9  |
| EUROPE                 |                     |            |             |         |             |        |             |        |             |        |             |          |             |
| Austria *              | 2000-2004           | 16.2       | 14.2 - 18.3 | 30.0    | 28.7 - 31.3 | 60.7   | 59.7 - 61.7 | 60.2   | 58.9 - 61.5 | 11.2   | 10.0 - 12.4 | 6.7 §    | 5.9 - 7.5   |
|                        | 2005-2009           | 16.8       | 15.0 - 18.7 | 34.2    | 32.9 - 35.6 | 63.5   | 62.5 - 64.4 | 63.5   | 62.2 - 64.8 | 14.2 § | 12.9 - 15.6 | 8.5      | 7.7 - 9.4   |
|                        | 2010-2014           | 18.6       | 16.6 - 20.6 | 35.4    | 34.0 - 36.9 | 63.7   | 62.7 - 64.7 | 64.2   | 62.9 - 65.6 | 14.8 § | 13.4 - 16.2 | 10.5 §   | 9.5 - 11.4  |
| Belarus (Childhood) †  | 2000-2004           | -          | -           | -       | -           | -      | -           | -      | -           | -      | -           | -        | -           |
|                        | 2005-2009           | -          | -           | -       | -           | -      | -           | -      | -           | -      | -           | -        | -           |
|                        | 2010-2014           | -          | -           | -       | -           | -      | -           | -      | -           | -      | -           | -        | -           |
| Belgium *              | 2000-2004           | 16.6       | 13.8 - 19.4 | 29.3    | 26.4 - 32.2 | 64.3   | 62.7 - 66.0 | 62.9   | 60.4 - 65.4 | 21.3   | 16.8 - 25.8 | 8.9      | 6.9 - 10.8  |
|                        | 2005-2009           | 23.2       | 21.7 - 24.7 | 35.8    | 34.4 - 37.1 | 65.0   | 64.3 - 65.7 | 65.3   | 64.3 - 66.4 | 20.6   | 19.0 - 22.3 | 10.5     | 9.6 - 11.4  |
|                        | 2010-2014           | 23.6       | 22.1 - 25.0 | 37.5    | 36.2 - 38.9 | 67.9   | 67.2 - 68.6 | 66.6   | 65.6 - 67.6 | 20.7   | 19.2 - 22.2 | 12.4     | 11.4 - 13.3 |
| Bulgaria *             | 2000-2004           | -          | -           | 11.2 §  | 10.3 - 12.0 | 43.9   | 42.7 - 45.2 | 37.0   | 35.6 - 38.4 | 4.0 §  | 2.9 - 5.1   | -        | -           |
|                        | 2005-2009           | -          | -           | 13.9    | 13.0 - 14.9 | 48.5   | 47.4 - 49.6 | 42.1   | 40.7 - 43.5 | 4.6 §  | 3.5 - 5.6   | -        | -           |
|                        | 2010-2014           | -          | -           | 16.0    | 14.9 - 17.0 | 52.4   | 51.3 - 53.6 | 45.9   | 44.4 - 47.4 | 6.5 §  | 5.1 - 7.9   | -        | -           |
| Croatia *              | 2000-2004           | 6.8        | 4.9 - 8.7   | 19.7    | 18.4 - 20.9 | 47.3   | 45.9 - 48.7 | 44.4   | 42.7 - 46.1 | 9.2 §  | 7.6 - 10.7  | 9.1      | 7.9 - 10.4  |
|                        | 2005-2009           | 9.1        | 6.9 - 11.2  | 18.9    | 17.6 - 20.2 | 49.5   | 48.2 - 50.8 | 47.1   | 45.5 - 48.7 | 9.2 §  | 7.7 - 10.8  | 8.2      | 7.0 - 9.4   |
|                        | 2010-2014           | 8.7        | 6.6 - 10.8  | 20.0    | 18.6 - 21.3 | 51.1   | 49.9 - 52.4 | 48.2   | 46.5 - 49.8 | 9.3 §  | 7.7 - 10.9  | 8.4 §    | 7.1 - 9.7   |
| Czech Republic *       | 2000-2004           | 7.3        | 6.0 - 8.6   | 18.7    | 17.7 - 19.7 | 48.0   | 47.3 - 48.8 | 43.8   | 42.6 - 44.9 | 3.0    | 2.3 - 3.6   | 3.6      | 3.0 - 4.1   |
|                        | 2005-2009           | 9.0        | 7.5 - 10.5  | 19.3    | 18.3 - 20.3 | 52.0   | 51.3 - 52.7 | 47.9   | 46.8 - 49.0 | 5.3    | 4.5 - 6.2   | 4.7      | 4.1 - 5.3   |
|                        | 2010-2014           | 9.8        | 8.3 - 11.4  | 20.6    | 19.6 - 21.6 | 56.1   | 55.4 - 56.9 | 52.3   | 51.2 - 53.4 | 6.7    | 5.6 - 7.7   | 6.1      | 5.4 - 6.7   |
| Denmark *              | 2000-2004           | 8.4        | 6.9 - 9.8   | 14.7    | 13.2 - 16.3 | 51.5   | 50.4 - 52.6 | 53.2   | 51.7 - 54.7 | 4.4    | 3.1 - 5.8   | 3.8      | 3.0 - 4.5   |
|                        | 2005-2009           | 10.4       | 8.9 - 11.9  | 15.4    | 13.9 - 16.9 | 56.5   | 55.5 - 57.6 | 59.8   | 58.4 - 61.1 | 5.6    | 4.2 - 7.0   | 5.6      | 4.7 - 6.4   |
|                        | 2010-2014           | 13.7       | 12.0 - 15.4 | 19.9    | 18.1 - 21.6 | 61.6   | 60.6 - 62.7 | 64.8   | 63.4 - 66.1 | 7.5    | 5.9 - 9.1   | 8.0      | 7.0 - 9.1   |
| Estonia *              | 2000-2004           | 5.7        | 2.8 - 8.6   | 22.3    | 20.2 - 24.4 | 48.9   | 46.2 - 51.5 | 46.4   | 42.9 - 49.9 | 5.5 §  | 2.8 - 8.3   | 4.8      | 3.2 - 6.5   |
|                        | 2005-2009           | 6.0        | 3.5 - 8.5   | 24.2    | 22.1 - 26.4 | 53.8   | 51.3 - 56.3 | 50.5   | 46.9 - 54.1 | 6.5    | 3.9 - 9.2   | 5.4      | 3.8 - 7.0   |
|                        | 2010-2014           | 5.4        | 2.3 - 8.5   | 29.2    | 26.1 - 32.3 | 58.4   | 55.2 - 61.6 | 54.8   | 50.1 - 59.5 | 4.2    | 1.8 - 6.6   | 10.2     | 7.0 - 13.4  |
| Finland *              | 2000-2004           | 11.8       | 9.5 - 14.1  | 26.0    | 24.3 - 27.6 | 61.3   | 59.9 - 62.8 | 59.9   | 58.0 - 61.9 | 7.1    | 5.5 - 8.8   | 4.1      | 3.2 - 4.9   |
|                        | 2005-2009           | 12.8       | 10.6 - 15.0 | 25.1    | 23.4 - 26.8 | 63.2   | 61.9 - 64.5 | 63.8   | 62.0 - 65.6 | 9.1 §  | 7.3 - 10.8  | 7.3      | 6.2 - 8.5   |
|                        | 2010-2014           | 12.4       | 10.5 - 14.4 | 25.7    | 23.9 - 27.5 | 64.9   | 63.7 - 66.2 | 64.4   | 62.6 - 66.1 | 10.4 § | 8.5 - 12.2  | 7.4 §    | 6.3 - 8.4   |
| France (23 registries) | 2000-2004           | 13.0       | 11.8 - 14.2 | 26.3    | 24.9 - 27.7 | 60.7   | 59.8 - 61.5 | 58.3   | 56.9 - 59.6 | 14.0   | 12.9 - 15.1 | 7.8      | 6.9 - 8.7   |
|                        | 2005-2009           | 14.9       | 13.6 - 16.1 | 27.1    | 25.8 - 28.4 | 63.6   | 62.8 - 64.3 | 60.7   | 59.5 - 61.9 | 16.5   | 15.4 - 17.6 | 9.0      | 8.2 - 9.8   |
|                        | 2010-2014           | 13.9       | 11.4 - 16.4 | 26.7    | 23.9 - 29.6 | 63.7   |             |        |             |        |             |          |             |

**Web-table 4.1: Age-standardised five-year net survival (NS, %): adults (15-99 years) diagnosed with cancer of the oesophagus, stomach, colon, rectum, liver or pancreas, by continent, country, registry and calendar period of diagnosis (2000-2004, 2005-2009, 2010-2014)**

|                                   | Period of diagnosis | Oesophagus |             | Stomach |             | Colon  |             | Rectum |             | Liver  |             | Pancreas |             |
|-----------------------------------|---------------------|------------|-------------|---------|-------------|--------|-------------|--------|-------------|--------|-------------|----------|-------------|
|                                   |                     | NS (%)     | 95% CI      | NS (%)  | 95% CI      | NS (%) | 95% CI      | NS (%) | 95% CI      | NS (%) | 95% CI      | NS (%)   | 95% CI      |
| Burgundy Digestive                | 2000-2004           | 13.6       | 10.2 - 17.0 | 23.1    | 19.4 - 26.8 | 60.2   | 57.9 - 62.5 | 58.6   | 54.6 - 62.7 | 9.4    | 6.9 - 11.8  | 7.2      | 4.9 - 9.6   |
|                                   | 2005-2009           | 13.0       | 9.6 - 16.4  | 24.8    | 20.9 - 28.6 | 62.0   | 59.7 - 64.4 | 58.5   | 54.5 - 62.5 | 17.4   | 14.4 - 20.3 | 6.6      | 4.6 - 8.5   |
|                                   | 2010-2014           | 4.2        | 0.3 - 8.1   | 19.9    | 12.8 - 27.0 | 63.9   | 59.0 - 68.7 | 62.5   | 54.2 - 70.7 | 20.1   | 13.0 - 27.2 | 5.8      | 2.2 - 9.5   |
| Calvados                          | 2000-2004           | -          | -           | -       | -           | -      | -           | -      | -           | -      | -           | -        | -           |
|                                   | 2005-2009           | -          | -           | -       | -           | -      | -           | -      | -           | -      | -           | -        | -           |
|                                   | 2010-2014           | -          | -           | -       | -           | -      | -           | -      | -           | -      | -           | -        | -           |
| Calvados Digestive                | 2000-2004           | 9.2        | 6.5 - 12.0  | 23.9    | 19.1 - 28.7 | 58.0   | 54.5 - 61.5 | 52.6   | 47.7 - 57.6 | 14.1   | 10.8 - 17.5 | 5.7      | 3.6 - 7.9   |
|                                   | 2005-2009           | 15.0       | 10.7 - 19.2 | 25.6    | 20.3 - 30.9 | 59.9   | 56.4 - 63.3 | 59.1   | 54.3 - 64.0 | 15.0   | 11.8 - 18.2 | 6.1      | 3.7 - 8.5   |
|                                   | 2010-2014           | 10.4       | 4.1 - 16.7  | 37.0    | 26.5 - 47.6 | 63.9   | 56.6 - 71.2 | 62.0   | 52.3 - 71.7 | 22.5   | 14.0 - 31.0 | 8.2      | 3.9 - 12.6  |
| Côte-d'Or Gynaecologic            | 2000-2004           | -          | -           | -       | -           | -      | -           | -      | -           | -      | -           | -        | -           |
|                                   | 2005-2009           | -          | -           | -       | -           | -      | -           | -      | -           | -      | -           | -        | -           |
|                                   | 2010-2014           | -          | -           | -       | -           | -      | -           | -      | -           | -      | -           | -        | -           |
| Côte-d'Or Haematopoietic          | 2000-2004           | -          | -           | -       | -           | -      | -           | -      | -           | -      | -           | -        | -           |
|                                   | 2005-2009           | -          | -           | -       | -           | -      | -           | -      | -           | -      | -           | -        | -           |
|                                   | 2010-2014           | -          | -           | -       | -           | -      | -           | -      | -           | -      | -           | -        | -           |
| Doubs                             | 2000-2004           | 16.6       | 11.0 - 22.3 | 21.3    | 16.2 - 26.3 | 60.5   | 56.9 - 64.2 | 59.5   | 54.0 - 65.0 | 20.2   | 14.9 - 25.5 | 5.3      | 2.6 - 8.1   |
|                                   | 2005-2009           | 13.9       | 8.8 - 19.0  | 28.5    | 23.0 - 34.1 | 62.7   | 59.1 - 66.4 | 65.2   | 59.8 - 70.7 | 16.0   | 11.5 - 20.6 | 7.1      | 4.4 - 9.9   |
|                                   | 2010-2014           | 9.1        | 1.2 - 17.1  | 36.6    | 23.1 - 50.1 | 66.8   | 59.3 - 74.2 | 67.8   | 56.5 - 79.1 | 18.8   | 9.3 - 28.3  | 7.9      | 1.9 - 13.8  |
| Finistère                         | 2000-2004           | -          | -           | -       | -           | -      | -           | -      | -           | -      | -           | -        | -           |
|                                   | 2005-2009           | 13.2       | 10.4 - 16.0 | 28.4    | 24.2 - 32.6 | 63.3   | 60.6 - 65.9 | 59.5   | 55.6 - 63.4 | 11.2   | 8.3 - 14.0  | 4.5      | 2.4 - 6.6   |
|                                   | 2010-2014           | 15.4       | 8.1 - 22.6  | 29.2    | 21.2 - 37.1 | 65.6   | 60.0 - 71.2 | 54.6   | 46.1 - 63.1 | 7.6    | 3.3 - 11.8  | 4.7      | 1.5 - 8.0   |
| Gironde                           | 2000-2004           | -          | -           | -       | -           | -      | -           | -      | -           | -      | -           | -        | -           |
|                                   | 2005-2009           | 10.6       | 6.4 - 14.7  | 19.9    | 15.3 - 24.4 | 63.8   | 60.9 - 66.8 | 59.3   | 54.2 - 64.4 | 23.4   | 18.8 - 27.9 | 8.2      | 5.3 - 11.1  |
|                                   | 2010-2014           | 17.3       | 10.3 - 24.3 | 24.1    | 16.2 - 32.1 | 68.9   | 63.9 - 73.8 | 55.5   | 43.9 - 67.1 | 40.5   | 32.5 - 48.5 | 13.3     | 9.1 - 17.6  |
| Gironde CNS                       | 2000-2004           | -          | -           | -       | -           | -      | -           | -      | -           | -      | -           | -        | -           |
|                                   | 2005-2009           | -          | -           | -       | -           | -      | -           | -      | -           | -      | -           | -        | -           |
|                                   | 2010-2014           | -          | -           | -       | -           | -      | -           | -      | -           | -      | -           | -        | -           |
| Gironde Haematopoietic            | 2000-2004           | -          | -           | -       | -           | -      | -           | -      | -           | -      | -           | -        | -           |
|                                   | 2005-2009           | -          | -           | -       | -           | -      | -           | -      | -           | -      | -           | -        | -           |
|                                   | 2010-2014           | -          | -           | -       | -           | -      | -           | -      | -           | -      | -           | -        | -           |
| Haut-Rhin                         | 2000-2004           | 15.1       | 11.2 - 19.0 | 21.1    | 16.6 - 25.7 | 63.6   | 60.7 - 66.5 | 58.5   | 53.6 - 63.4 | 16.7   | 12.4 - 20.9 | 9.5      | 6.3 - 12.8  |
|                                   | 2005-2009           | 18.4       | 13.5 - 23.4 | 28.5    | 23.6 - 33.3 | 68.1   | 65.2 - 71.0 | 66.1   | 61.4 - 70.8 | 18.7   | 13.5 - 23.9 | 10.7     | 7.8 - 13.7  |
|                                   | 2010-2014           | 32.7       | 19.7 - 45.6 | 24.7    | 15.4 - 34.0 | 65.9   | 59.9 - 72.0 | 68.2   | 58.8 - 77.6 | 16.0   | 8.3 - 23.7  | 15.0     | 7.4 - 22.6  |
| Haute-Vienne                      | 2000-2004           | -          | -           | -       | -           | -      | -           | -      | -           | -      | -           | -        | -           |
|                                   | 2005-2009           | 27.6       | 10.8 - 44.4 | 16.6    | 2.5 - 30.7  | 69.8   | 62.1 - 77.6 | 71.5   | 59.1 - 84.0 | 15.2   | 0.0 - 32.5  | 16.5     | 7.2 - 25.8  |
|                                   | 2010-2014           | -          | -           | -       | -           | -      | -           | -      | -           | -      | -           | -        | -           |
| Hérault                           | 2000-2004           | 12.1       | 8.3 - 15.9  | 27.8    | 23.4 - 32.2 | 63.1   | 60.5 - 65.6 | 60.5   | 56.5 - 64.4 | 14.9   | 11.6 - 18.2 | 8.4      | 5.9 - 10.9  |
|                                   | 2005-2009           | 17.7       | 13.4 - 22.0 | 27.8    | 23.4 - 32.2 | 65.8   | 63.4 - 68.2 | 60.1   | 56.1 - 64.1 | 18.3   | 14.9 - 21.7 | 13.5     | 10.8 - 16.3 |
|                                   | 2010-2014           | 13.3       | 5.9 - 20.7  | 23.6    | 14.7 - 32.5 | 64.9   | 60.1 - 69.7 | 52.3   | 43.8 - 60.8 | 19.5   | 12.5 - 26.5 | 10.0     | 5.0 - 15.0  |
| Isère                             | 2000-2004           | 12.7       | 8.8 - 16.6  | 31.9    | 27.9 - 36.0 | 62.7   | 60.3 - 65.2 | 61.5   | 57.5 - 65.6 | 13.5   | 10.6 - 16.5 | 8.9      | 6.4 - 11.5  |
|                                   | 2005-2009           | 16.6       | 12.3 - 20.9 | 31.1    | 26.8 - 35.4 | 65.4   | 63.1 - 67.8 | 62.9   | 58.8 - 67.1 | 19.3   | 15.9 - 22.6 | 11.0     | 8.4 - 13.6  |
|                                   | 2010-2014           | 9.2        | 3.9 - 14.4  | 31.8    | 23.4 - 40.2 | 65.4   | 60.4 - 70.3 | 57.6   | 49.6 - 65.7 | 27.1   | 19.0 - 35.3 | 8.7      | 4.0 - 13.3  |
| Lille Metro                       | 2000-2004           | -          | -           | -       | -           | -      | -           | -      | -           | -      | -           | -        | -           |
|                                   | 2005-2009           | 11.8       | 6.4 - 17.3  | 17.8    | 10.8 - 24.8 | 62.7   | 57.4 - 68.0 | 55.5   | 47.4 - 63.6 | 11.8   | 6.6 - 17.0  | 7.9      | 4.4 - 11.4  |
|                                   | 2010-2014           | -          | -           | -       | -           | -      | -           | -      | -           | -      | -           | -        | -           |
| Loire-Atlantique                  | 2000-2004           | 15.3       | 12.5 - 18.0 | 25.3    | 21.9 - 28.6 | 60.0   | 58.1 - 61.9 | 58.7   | 55.7 - 61.7 | 13.6   | 11.3 - 15.9 | 7.1      | 5.0 - 9.3   |
|                                   | 2005-2009           | 16.8       | 13.7 - 19.8 | 28.5    | 25.1 - 31.9 | 64.1   | 62.3 - 66.0 | 60.4   | 57.4 - 63.3 | 15.4   | 13.3 - 17.6 | 9.1      | 7.1 - 11.1  |
|                                   | 2010-2014           | 17.8       | 11.3 - 24.3 | 24.7    | 17.7 - 31.7 | 62.7   | 58.8 - 66.5 | 64.8   | 58.7 - 70.9 | 16.1   | 11.9 - 20.3 | 7.4      | 4.0 - 10.8  |
| Manche                            | 2000-2004           | 12.3       | 8.8 - 15.8  | 26.0    | 21.1 - 30.8 | 58.5   | 54.6 - 62.5 | 59.0   | 53.6 - 64.5 | 16.8   | 10.5 - 23.1 | 7.9      | 4.5 - 11.3  |
|                                   | 2005-2009           | 14.0       | 9.8 - 18.3  | 26.5    | 21.6 - 31.4 | 59.0   | 55.3 - 62.7 | 57.2   | 51.9 - 62.5 | 12.0   | 8.0 - 15.9  | 6.5      | 3.4 - 9.5   |
|                                   | 2010-2014           | 7.5        | 2.7 - 12.2  | 29.4    | 19.1 - 39.8 | 59.6   | 52.4 - 66.9 | 69.0   | 58.2 - 79.8 | 8.7    | 3.4 - 13.9  | 2.9      | 0.0 - 6.7   |
| Somme                             | 2000-2004           | 7.1        | 4.1 - 10.1  | 23.1    | 17.4 - 28.7 | 56.0   | 52.5 - 59.5 | 53.3   | 48.0 - 58.6 | 14.4   | 9.7 - 19.1  | 7.1      | 4.0 - 10.1  |
|                                   | 2005-2009           | 9.7        | 6.2 - 13.2  | 26.6    | 21.3 - 31.8 | 58.0   | 54.4 - 61.7 | 55.7   | 50.5 - 60.9 | 17.0   | 12.4 - 21.6 | 6.8      | 4.0 - 9.7   |
|                                   | 2010-2014           | 8.8        | 3.3 - 14.4  | 16.0    | 9.9 - 22.2  | 58.4   | 50.4 - 66.5 | 54.1   | 43.3 - 64.8 | 12.3   | 5.4 - 19.3  | 20.0     | 12.2 - 27.9 |
| Tarn                              | 2000-2004           | 11.4       | 6.0 - 16.9  | 28.6    | 21.9 - 35.3 | 60.4   | 56.4 - 64.4 | 55.3   | 49.9 - 60.6 | 14.6   | 8.4 - 20.8  | 6.4      | 3.1 - 9.8   |
|                                   | 2005-2009           | 18.4       | 11.7 - 25.1 | 26.4    | 19.7 - 33.2 | 63.5   | 59.5 - 67.4 | 67.4   | 62.1 - 72.7 | 20.8   | 13.3 - 28.4 | 7.8      | 4.6 - 10.9  |
|                                   | 2010-2014           | 17.3       | 9.6 - 25.1  | 20.0    | 7.1 - 32.8  | 60.4   | 52.4 - 68.3 | 62.9   | 52.3 - 73.5 | 17.4   | 6.7 - 28.0  | 14.5     | 8.7 - 20.3  |
| France Childhood Haematopoietic † | 2000-2004           | -          | -           | -       | -           | -      | -           | -      | -           | -      | -           | -        | -           |
|                                   | 2005-2009           | -          | -           | -       | -           | -      | -           | -      | -           | -      | -           | -        | -           |
|                                   | 2010-2014           | -          | -           | -       | -           | -      | -           | -      | -           | -      | -           | -        | -           |
| France Childhood Solid †          | 2000-2004           | -          | -           | -       | -           | -      | -           | -      | -           | -      | -           | -        | -           |
|                                   | 2005-2009           | -          | -           | -       | -           | -      | -           | -      | -           | -      | -           | -        | -           |
|                                   | 2010-2014           | -          | -           | -       | -           | -      | -           | -      | -           | -      | -           | -        | -           |
| Germany (10 registries)           | 2000-2004           | 16.6       | 15.3 - 17.8 | 31.8    | 30.0 - 33.5 | 62.0   | 61.2 - 62.8 | 60.9   | 60.2 - 61.6 | 12.5 § | 11.6 - 13.4 | 8.0 §    | 7.5 - 8.6   |
|                                   | 2005-2009           | 19.7       | 18.8 - 20.6 | 31.4    | 30.8 - 32.0 | 64.9   | 64.4 - 65.3 | 62.2   | 61.6 - 62.8 | 12.9   | 11.3 - 14.5 | 9.3      | 8.4 - 10.2  |
|                                   | 2010-2014           | 20.8       | 19.8 - 21.8 | 33.5    | 32.8 - 34.2 | 64.8   | 64.3 - 65.3 | 62.3   | 61.6 - 62.9 | 13.0   | 10.5 - 15.5 | 10.7     | 9.6 - 11.8  |
| Brandenburg                       | 2000-2004           | 14.5       | 11.6 - 17.5 | 31.6 §  | 29.5 - 33.8 | 61.2   | 59.5 - 62.9 | 60.1   | 57.9 - 62.3 | 14.5 § | 11.6 - 17.3 | 10.8 §   | 8.8 - 12.7  |
|                                   | 2005-2009           | 17.9       | 14.8 - 21.0 | 31.2    | 29.2 - 33.2 | 65.2   | 63.7 - 66.8 | 62.2   | 60.1 - 64.2 | 16.6 § | 14.0 - 19.2 | 7.4 §    | 6.1 - 8.7   |
|                                   | 2010-2014           | 20.8       | 17.6 - 23.9 | 34.8    | 32.7 - 37.0 | 65.9   | 64.3 - 67.5 | 62.0   | 59.9 - 64.0 | 16.5 § | 13.9 - 19.1 | 9.6 §    | 8.0 - 11.2  |
| Bremen                            | 2000-2004           | 18.6       | 13.5 - 23.6 | 30.8    | 26.8 - 34.9 | 62.8   | 59.8 - 65.8 | 59.2   | 55.1 - 63.3 | 10.0 § | 6.0 - 13.9  | 5.2 §    | 3.0 - 7.3   |
|                                   | 2005-2009           | 15.2       | 11.2 - 19.1 | 31.0    | 26.7 - 35.3 | 65.4   | 62.5 - 68.4 | 65.4   | 61.6 - 69.3 | 11.1   | 7.2 - 15.1  | 6.0      | 4.1 - 8.0   |
|                                   | 2010-2014           | 16.6       | 11.9 - 21.3 | 34.1    | 28.9 - 39.2 | 65.8   | 62.4 - 69.1 | 66.8   | 62.4 - 71.3 | 8.6    | 5.1 - 12.1  | 8.9      | 5.9 - 11.9  |
| Hamburg                           | 2000-2004           | 10.4       | 7.9 - 12.9  | 26.0 §  | 23.3 - 28.7 | 56.7 § | 54.5 - 58.9 | 55.7   | 52.7 - 58.6 | 8.2 §  | 5.6 - 10.8  | 8.4 §    | 6.4 - 10.5  |
|                                   | 2005-2009           | 14.8       | 11.9 - 17.7 | 27.8    | 25.0 - 30.5 | 57.9   | 55.9 - 59.9 | 59.4   | 56.6 - 62.2 | 13.2 § | 10.4 - 16.0 | 8.6 §    | 6.7 - 10.5  |
|                                   | 2010-2014           | 15.2       | 12.0 - 18.4 | 32.0    | 28.8 - 35.3 | 61.5   | 59.3 - 63.7 | 62.5   | 59.3 - 65.6 | 13.3 § | 10.2 - 16.5 | 8.9 §    | 6.7 - 11.2  |
| Lower Saxony                      | 2000-2004           | 21.1       | 18.0 - 24.1 | 30.3 §  | 28.4 - 32.2 | 66.7 § | 65.3 - 68.0 | 64.3   | 62.4 - 66.2 | 12.0 § | 9.5 - 14.5  | 6.8 §    | 5.4 - 8.2   |
|                                   | 2005-2009           | 20.4       | 18.6 - 22.2 | 31.9    | 30.7 - 33.2 | 65.3   | 64.5 - 66.2 | 62.8   | 61.6 - 64.0 | 14.1 § | 12.5 - 15.8 | 7.9 §    | 6.9 - 8.8   |
|                                   | 2010-2014           | 20.9       | 19.0 - 22.9 | 33.2    | 31.8 - 34.6 | 64.5   | 63.6 - 65.5 | 62.8   | 61.4 - 64.1 | 14.9 § | 13.0 - 16.8 | 8.1 §    | 7.1 - 9.2   |
| Mecklenburg-Western Pomerania     | 2000-2004           | 13.5       | 10.7 - 16.2 | 31.1    | 28.7 - 33.4 | 60.2   | 58.2 - 62.2 | 57.6   | 54.9 - 60.2 | 8.2 §  | 5.9 - 10.5  | 5.8 §    | 4.3 - 7.4   |
|                                   | 2005-2009           | 18.4       | 15.4 - 21.4 | 31.4    | 29.0 - 33.7 | 65.3   | 63.4 - 67.2 | 60.5   | 57.9 - 63.1 | 13.5 § | 10.6 - 16.3 | 8.1      | 6.4 - 9.8   |
|                                   | 2010-2014           | 17.8       | 14.8 - 20.8 | 33.2    | 30.7 - 35.7 | 65.8   | 63.9 - 67.8 | 61.6   | 59.1 - 64.2 | 15.2 § | 12.2 - 18.2 | 10.4 §   | 8.5 - 12.4  |

**Web-table 4.1: Age-standardised five-year net survival (NS, %): adults (15-99 years) diagnosed with cancer of the oesophagus, stomach, colon, rectum, liver or pancreas, by continent, country, registry and calendar period of diagnosis (2000-2004, 2005-2009, 2010-2014)**

|                             | Period of diagnosis | Oesophagus    |                    | Stomach       |                    | Colon         |                    | Rectum        |                    | Liver         |                    | Pancreas      |                   |
|-----------------------------|---------------------|---------------|--------------------|---------------|--------------------|---------------|--------------------|---------------|--------------------|---------------|--------------------|---------------|-------------------|
|                             |                     | NS (%)        | 95% CI             | NS (%)        | 95% CI             | NS (%)        | 95% CI             | NS (%)        | 95% CI             | NS (%)        | 95% CI             | NS (%)        | 95% CI            |
| Rhineland Palatinate        | 2000-2004           | <b>23.7</b> § | 20.6 - 26.7        | <b>32.4</b> § | 30.5 - 34.3        | <b>65.0</b> § | 63.7 - 66.2        | <b>63.3</b>   | 61.5 - 65.1        | <b>15.5</b> § | 13.1 - 17.8        | <b>8.2</b> §  | 6.9 - 9.6         |
|                             | 2005-2009           | <b>24.2</b>   | 21.3 - 27.0        | <b>33.0</b>   | 31.2 - 34.9        | <b>65.3</b>   | 64.1 - 66.5        | <b>62.9</b>   | 61.2 - 64.5        | <b>14.2</b> § | 12.0 - 16.3        | <b>8.1</b> §  | 6.7 - 9.5         |
|                             | 2010-2014           | <b>23.3</b> § | 20.4 - 26.3        | <b>30.6</b> § | 28.6 - 32.6        | <b>63.8</b> § | 62.4 - 65.1        | <b>60.9</b> § | 59.0 - 62.7        | <b>14.8</b> § | 12.5 - 17.2        | <b>8.1</b> §  | 6.7 - 9.6         |
| Saarland                    | 2000-2004           | <b>19.4</b>   | 14.7 - 24.2        | <b>33.4</b>   | 29.9 - 36.8        | <b>65.2</b>   | 63.0 - 67.4        | <b>63.8</b>   | 60.8 - 66.9        | <b>12.6</b> § | 9.0 - 16.2         | <b>8.8</b> §  | 6.4 - 11.2        |
|                             | 2005-2009           | <b>25.8</b>   | 20.7 - 31.0        | <b>32.9</b>   | 29.5 - 36.4        | <b>66.9</b>   | 64.4 - 69.3        | <b>66.2</b>   | 62.9 - 69.5        | <b>18.2</b> § | 14.3 - 22.2        | <b>9.4</b> §  | 6.8 - 12.0        |
|                             | 2010-2014           | <b>28.9</b>   | 21.7 - 36.1        | <b>36.4</b>   | 31.6 - 41.1        | <b>66.5</b>   | 63.5 - 69.4        | <b>66.8</b>   | 62.8 - 70.9        | <b>15.4</b> § | 11.3 - 19.4        | <b>8.3</b> §  | 5.3 - 11.2        |
| Saxony                      | 2000-2004           | <b>16.7</b>   | 14.3 - 19.2        | <b>31.2</b> § | 29.7 - 32.7        | <b>61.5</b>   | 60.3 - 62.8        | <b>58.8</b>   | 57.1 - 60.4        | <b>10.9</b> § | 9.1 - 12.8         | <b>7.5</b> §  | 6.4 - 8.6         |
|                             | 2005-2009           | <b>18.3</b>   | 16.0 - 20.7        | <b>32.3</b>   | 30.8 - 33.9        | <b>64.8</b>   | 63.6 - 65.9        | <b>61.3</b>   | 59.8 - 62.8        | <b>13.0</b>   | 11.3 - 14.7        | <b>10.1</b>   | 8.9 - 11.3        |
|                             | 2010-2014           | <b>20.8</b>   | 18.4 - 23.2        | <b>34.4</b>   | 32.8 - 36.0        | <b>65.6</b>   | 64.4 - 66.8        | <b>62.2</b>   | 60.7 - 63.7        | <b>16.1</b> § | 14.2 - 17.9        | <b>11.1</b>   | 9.9 - 12.4        |
| Schleswig-Holstein          | 2000-2004           | <b>18.4</b> § | 15.4 - 21.4        | <b>28.9</b> § | 26.9 - 30.9        | <b>63.6</b> § | 62.1 - 65.1        | <b>62.0</b>   | 60.0 - 64.0        | <b>17.1</b> § | 13.5 - 20.7        | <b>8.7</b> §  | 7.1 - 10.3        |
|                             | 2005-2009           | <b>20.8</b>   | 18.0 - 23.6        | <b>31.1</b>   | 29.0 - 33.2        | <b>66.7</b>   | 65.2 - 68.1        | <b>62.6</b>   | 60.7 - 64.6        | <b>16.7</b> § | 13.4 - 19.9        | <b>10.5</b> § | 8.7 - 12.2        |
|                             | 2010-2014           | <b>26.8</b> § | 22.8 - 30.8        | <b>33.4</b> § | 30.7 - 36.2        | <b>67.8</b>   | 66.0 - 69.6        | <b>63.1</b>   | 60.6 - 65.6        | <b>18.0</b> § | 13.7 - 22.2        | <b>12.7</b> § | 10.3 - 15.1       |
| Thuringia                   | 2000-2004           | <b>13.9</b> § | 10.4 - 17.5        | <b>32.4</b> § | 30.0 - 34.7        | <b>61.7</b> § | 59.9 - 63.5        | <b>60.0</b>   | 57.8 - 62.3        | <b>13.0</b> § | 9.8 - 16.1         | <b>8.4</b> §  | 6.6 - 10.2        |
|                             | 2005-2009           | <b>18.2</b>   | 14.9 - 21.6        | <b>28.0</b>   | 26.0 - 30.1        | <b>63.2</b>   | 61.6 - 64.9        | <b>60.6</b>   | 58.5 - 62.7        | <b>12.2</b> § | 9.5 - 14.8         | <b>9.9</b> §  | 8.3 - 11.5        |
|                             | 2010-2014           | <b>21.4</b>   | 17.7 - 25.2        | <b>33.3</b>   | 31.0 - 35.5        | <b>62.6</b>   | 61.0 - 64.3        | <b>59.9</b>   | 57.8 - 62.0        | <b>17.2</b> § | 14.3 - 20.1        | <b>12.3</b> § | 10.5 - 14.2       |
| Gibraltar *                 | 2000-2004           | -             | -                  | <i>8.0</i>    | <i>0.0 - 19.9</i>  | <i>38.8</i>   | <i>17.7 - 59.9</i> | -             | -                  | -             | -                  | -             | -                 |
|                             | 2005-2009           | -             | -                  | <i>39.2</i> § | <i>12.8 - 65.5</i> | <i>52.3</i> § | <i>24.3 - 80.4</i> | <i>39.3</i> § | <i>7.6 - 70.9</i>  | -             | -                  | <i>0.6</i> §  | <i>0.0 - 1.9</i>  |
|                             | 2010-2014           | -             | -                  | -             | -                  | -             | -                  | -             | -                  | -             | -                  | -             | -                 |
| Greek National Paediatric † | 2000-2004           | -             | -                  | -             | -                  | -             | -                  | -             | -                  | -             | -                  | -             | -                 |
|                             | 2005-2009           | -             | -                  | -             | -                  | -             | -                  | -             | -                  | -             | -                  | -             | -                 |
|                             | 2010-2014           | -             | -                  | -             | -                  | -             | -                  | -             | -                  | -             | -                  | -             | -                 |
| Iceland *                   | 2000-2004           | <i>13.1</i>   | <i>3.8 - 22.4</i>  | <b>32.9</b>   | 24.9 - 40.9        | <b>61.4</b>   | 55.4 - 67.4        | <b>71.0</b>   | 63.0 - 79.0        | <i>3.9</i>    | <i>0.0 - 10.0</i>  | <b>4.8</b>    | 1.4 - 8.1         |
|                             | 2005-2009           | <i>19.1</i>   | <i>10.4 - 27.8</i> | <b>30.3</b>   | 21.9 - 38.6        | <b>64.0</b>   | 58.8 - 69.1        | <b>66.3</b>   | 58.2 - 74.5        | <i>16.0</i>   | <i>6.0 - 26.1</i>  | <b>0.0</b>    | 0.0 - 0.1         |
|                             | 2010-2014           | <b>17.7</b>   | 10.5 - 24.8        | <b>28.1</b>   | 20.2 - 36.1        | <b>68.2</b>   | 63.2 - 73.1        | <b>63.0</b>   | 55.5 - 70.5        | <b>14.3</b>   | 6.9 - 21.7         | <i>0.0</i>    | <i>0.0 - 0.0</i>  |
| Ireland *                   | 2000-2004           | <b>12.9</b>   | 11.0 - 14.7        | <b>18.6</b>   | 16.7 - 20.4        | <b>53.3</b>   | 51.8 - 54.7        | <b>51.1</b>   | 48.9 - 53.2        | <b>11.6</b>   | 8.7 - 14.6         | <b>5.7</b>    | 4.4 - 7.0         |
|                             | 2005-2009           | <b>17.2</b>   | 15.2 - 19.1        | <b>22.2</b>   | 20.4 - 24.1        | <b>58.4</b>   | 57.1 - 59.7        | <b>57.1</b>   | 55.0 - 59.1        | <b>11.8</b>   | 9.4 - 14.2         | <b>6.9</b>    | 5.6 - 8.2         |
|                             | 2010-2014           | <b>20.3</b>   | 18.0 - 22.7        | <b>27.6</b>   | 25.4 - 29.8        | <b>60.5</b>   | 59.1 - 62.0        | <b>61.7</b>   | 59.4 - 64.0        | <b>14.2</b>   | 11.2 - 17.2        | <b>9.6</b>    | 7.9 - 11.4        |
| Italy (45 registries)       | 2000-2004           | <b>11.5</b>   | 10.5 - 12.6        | <b>31.6</b>   | 30.9 - 32.2        | <b>59.0</b>   | 58.6 - 59.5        | <b>55.8</b>   | 54.9 - 56.6        | <b>15.9</b>   | 15.2 - 16.5        | <b>6.8</b>    | 6.3 - 7.3         |
|                             | 2005-2009           | <b>12.9</b>   | 11.9 - 14.0        | <b>31.1</b>   | 30.5 - 31.7        | <b>64.3</b>   | 63.9 - 64.7        | <b>61.1</b>   | 60.4 - 61.8        | <b>20.0</b>   | 19.4 - 20.6        | <b>7.9</b>    | 7.5 - 8.3         |
|                             | 2010-2014           | <b>13.8</b>   | 12.3 - 15.3        | <b>30.5</b>   | 29.7 - 31.3        | <b>64.2</b>   | 63.6 - 64.7        | <b>61.3</b>   | 60.3 - 62.2        | <b>20.3</b>   | 19.6 - 21.1        | <b>9.2</b>    | 8.5 - 9.8         |
| Alto Adige                  | 2000-2004           | <b>10.7</b>   | 6.2 - 15.2         | <b>37.2</b>   | 32.8 - 41.6        | <b>61.5</b>   | 58.1 - 64.9        | <b>62.1</b>   | 56.8 - 67.5        | <b>16.7</b>   | 12.9 - 20.5        | <b>6.2</b>    | 3.6 - 8.9         |
|                             | 2005-2009           | <i>6.0</i>    | <i>1.6 - 10.4</i>  | <b>38.3</b>   | 33.9 - 42.8        | <b>67.9</b>   | 64.6 - 71.3        | <b>59.7</b>   | 54.4 - 65.1        | <b>24.2</b>   | 20.1 - 28.3        | <b>8.1</b>    | 5.3 - 10.8        |
|                             | 2010-2014           | <b>5.0</b>    | 0.0 - 10.6         | <b>33.4</b>   | 23.3 - 43.4        | <b>74.2</b>   | 67.4 - 81.0        | <b>61.7</b>   | 50.3 - 73.0        | <b>25.8</b>   | 15.5 - 36.0        | <b>12.0</b>   | 4.7 - 19.4        |
| Barletta-Andria-Trani       | 2000-2004           | -             | -                  | -             | -                  | -             | -                  | -             | -                  | -             | -                  | -             | -                 |
|                             | 2005-2009           | <i>43.0</i>   | <i>14.2 - 71.7</i> | <b>32.4</b>   | 26.6 - 38.3        | <b>59.5</b>   | 55.1 - 63.9        | <b>63.0</b>   | 55.3 - 70.7        | <b>20.5</b>   | 16.1 - 24.8        | <b>8.1</b>    | 4.1 - 12.2        |
|                             | 2010-2014           | <i>22.1</i>   | <i>2.9 - 41.2</i>  | <b>22.7</b>   | 15.4 - 29.9        | <b>55.7</b>   | 45.0 - 66.4        | <b>71.1</b>   | 62.3 - 80.0        | <b>18.8</b>   | 13.0 - 24.7        | <b>5.5</b>    | 1.3 - 9.8         |
| Basilicata                  | 2000-2004           | -             | -                  | -             | -                  | -             | -                  | -             | -                  | -             | -                  | -             | -                 |
|                             | 2005-2009           | <b>12.7</b>   | 5.9 - 19.6         | <b>30.8</b>   | 26.5 - 35.2        | <b>62.6</b>   | 59.4 - 65.9        | <b>56.3</b>   | 50.9 - 61.8        | <b>16.7</b>   | 12.9 - 20.5        | <b>8.7</b>    | 5.2 - 12.2        |
|                             | 2010-2014           | -             | -                  | <i>24.4</i>   | <i>17.1 - 31.7</i> | <b>64.1</b>   | 57.6 - 70.7        | <i>72.1</i>   | <i>60.9 - 83.3</i> | <i>18.4</i>   | <i>11.1 - 25.6</i> | <i>16.9</i>   | <i>7.9 - 25.9</i> |
| Bergamo                     | 2000-2004           | -             | -                  | -             | -                  | -             | -                  | -             | -                  | -             | -                  | -             | -                 |
|                             | 2005-2009           | <b>13.2</b>   | 8.5 - 17.8         | <b>32.2</b>   | 28.9 - 35.4        | <b>66.9</b>   | 64.2 - 69.5        | <b>66.0</b>   | 61.0 - 71.0        | <b>22.0</b>   | 19.0 - 25.0        | <b>6.2</b>    | 4.3 - 8.1         |
|                             | 2010-2014           | <i>12.9</i>   | <i>6.6 - 19.1</i>  | <b>32.5</b>   | 28.5 - 36.5        | <b>63.6</b>   | 58.9 - 68.3        | <b>64.1</b>   | 56.9 - 71.4        | <b>29.1</b>   | 24.8 - 33.4        | <b>6.7</b>    | 4.2 - 9.1         |
| Biella-Vercelli             | 2000-2004           | <i>10.4</i>   | <i>2.2 - 18.5</i>  | <b>25.4</b>   | 19.8 - 31.0        | <b>57.1</b>   | 52.2 - 62.0        | <b>50.1</b>   | 42.9 - 57.2        | <b>11.9</b>   | 7.3 - 16.6         | <i>4.9</i>    | <i>1.8 - 8.0</i>  |
|                             | 2005-2009           | <i>3.4</i>    | <i>0.0 - 7.5</i>   | <b>28.8</b>   | 22.9 - 34.7        | <b>62.8</b>   | 59.3 - 66.3        | <b>61.0</b>   | 54.8 - 67.1        | <b>18.9</b>   | 14.3 - 23.4        | <b>5.4</b>    | 2.4 - 8.3         |
|                             | 2010-2014           | <i>6.9</i>    | <i>0.0 - 17.3</i>  | <b>31.2</b>   | 20.8 - 41.6        | <b>62.9</b>   | 55.5 - 70.3        | <b>59.1</b>   | 47.2 - 70.9        | <b>6.4</b>    | 1.1 - 11.7         | <i>2.1</i>    | <i>0.0 - 5.1</i>  |
| Brescia                     | 2000-2004           | <b>14.1</b>   | 10.4 - 17.7        | <b>36.7</b>   | 34.3 - 39.2        | <b>59.7</b>   | 57.6 - 61.9        | <b>57.0</b>   | 52.5 - 61.5        | <b>20.1</b>   | 17.8 - 22.4        | <b>7.5</b>    | 5.4 - 9.6         |
|                             | 2005-2009           | <b>11.7</b>   | 8.0 - 15.4         | <b>34.8</b>   | 31.8 - 37.8        | <b>64.0</b>   | 61.8 - 66.2        | <b>61.4</b>   | 57.0 - 65.8        | <b>26.1</b>   | 23.3 - 28.8        | <b>7.3</b>    | 4.9 - 9.6         |
|                             | 2010-2014           | -             | -                  | -             | -                  | -             | -                  | -             | -                  | -             | -                  | -             | -                 |
| Brindisi                    | 2000-2004           | -             | -                  | -             | -                  | -             | -                  | -             | -                  | -             | -                  | -             | -                 |
|                             | 2005-2009           | <i>15.4</i>   | <i>0.5 - 30.3</i>  | <b>30.2</b>   | 23.1 - 37.4        | <b>60.3</b>   | 55.4 - 65.2        | <b>54.5</b>   | 46.7 - 62.3        | <i>8.0</i>    | <i>3.9 - 12.0</i>  | <i>7.2</i>    | <i>3.0 - 11.4</i> |
|                             | 2010-2014           | -             | -                  | -             | -                  | -             | -                  | -             | -                  | -             | -                  | -             | -                 |
| Caserta                     | 2000-2004           | -             | -                  | -             | -                  | -             | -                  | -             | -                  | -             | -                  | -             | -                 |
|                             | 2005-2009           | <i>0.7</i>    | <i>0.0 - 2.4</i>   | <b>25.1</b>   | 19.9 - 30.4        | <b>60.6</b>   | 56.3 - 64.9        | <b>54.8</b>   | 47.2 - 62.4        | <b>14.0</b>   | 10.2 - 17.7        | <i>2.8</i>    | <i>0.3 - 5.4</i>  |
|                             | 2010-2014           | <i>0.2</i>    | <i>0.0 - 0.6</i>   | <b>30.2</b>   | 21.7 - 38.8        | <b>62.4</b>   | 53.7 - 71.1        | <i>60.9</i>   | <i>48.5 - 73.4</i> | <i>20.0</i>   | <i>11.5 - 28.4</i> | <i>7.5</i>    | <i>1.5 - 13.4</i> |
| Catania-Messina-Enna        | 2000-2004           | <i>16.7</i>   | <i>7.3 - 26.0</i>  | <b>26.9</b>   | 23.2 - 30.6        | <b>62.4</b>   | 59.5 - 65.2        | <b>54.3</b>   | 49.2 - 59.4        | <b>16.1</b>   | 12.3 - 19.9        | <b>5.9</b>    | 3.9 - 7.9         |
|                             | 2005-2009           | <b>13.9</b>   | 8.4 - 19.4         | <b>27.2</b>   | 24.7 - 29.6        | <b>61.6</b>   | 59.9 - 63.3        | <b>57.2</b>   | 54.0 - 60.3        | <b>19.4</b>   | 16.7 - 22.1        | <b>7.1</b>    | 5.4 - 8.8         |
|                             | 2010-2014           | <b>17.0</b>   | 9.0 - 25.0         | <b>29.2</b>   | 25.9 - 32.5        | <b>59.4</b>   | 57.2 - 61.6        | <b>57.7</b>   | 53.6 - 61.7        | <b>22.7</b>   | 18.9 - 26.5        | <b>7.8</b>    | 5.5 - 10.1        |
| Catanzaro                   | 2000-2004           | -             | -                  | <b>34.3</b>   | 24.9 - 43.7        | <b>60.4</b>   | 53.1 - 67.7        | <i>54.2</i>   | <i>40.0 - 68.3</i> | <i>11.1</i>   | <i>3.2 - 19.0</i>  | <i>5.4</i>    | <i>0.0 - 11.9</i> |
|                             | 2005-2009           | <i>12.5</i>   | <i>1.6 - 23.4</i>  | <b>27.5</b>   | 22.7 - 32.3        | <b>60.4</b>   | 56.2 - 64.5        | <b>56.0</b>   | 49.6 - 62.4        | <b>26.4</b>   | 20.2 - 32.7        | <b>8.9</b>    | 4.3 - 13.6        |
|                             | 2010-2014           | -             | -                  | -             | -                  | -             | -                  | -             | -                  | -             | -                  | -             | -                 |
| Como                        | 2000-2004           | <i>18.9</i>   | <i>8.0 - 29.9</i>  | <b>31.5</b>   | 25.7 - 37.3        | <b>57.2</b>   | 52.7 - 61.6        | <b>56.6</b>   | 48.9 - 64.3        | <b>11.2</b>   | 6.8 - 15.6         | <b>5.6</b>    | 2.4 - 8.9         |
|                             | 2005-2009           | <i>8.7</i>    | <i>2.7 - 14.6</i>  | <b>30.9</b>   | 27.4 - 34.5        | <b>63.8</b>   | 61.1 - 66.5        | <b>56.4</b>   | 51.3 - 61.5        | <b>16.0</b>   | 12.8 - 19.2        | <b>4.7</b>    | 0.9 - 8.6         |
|                             | 2010-2014           | <i>0.0</i>    | <i>0.0 - 0.0</i>   | <b>34.5</b>   | 28.8 - 40.3        | <b>65.3</b>   | 61.0 - 69.6        | <b>53.1</b>   | 45.4 - 60.8        | <b>13.2</b>   | 8.8 - 17.7         | <b>8.5</b>    | 4.8 - 12.1        |
| Cremona                     | 2000-2004           | -             | -                  | -             | -                  | -             | -                  | -             | -                  | -             | -                  | -             | -                 |
|                             | 2005-2009           | <i>15.8</i>   | <i>8.7 - 22.9</i>  | <b>33.5</b>   | 29.3 - 37.7        | <b>67.0</b>   | 63.2 - 70.7        | <b>66.9</b>   | 60.0 - 73.8        | <b>17.2</b>   | 13.2 - 21.2        | <b>8.6</b>    | 5.7 - 11.4        |
|                             | 2010-2014           | <i>19.0</i>   | <i>0.5 - 37.6</i>  | <b>29.3</b>   | 22.0 - 36.5        | <b>61.3</b>   | 54.2 - 68.4        | <b>56.7</b>   | 41.9 - 71.5        | <b>17.1</b>   | 10.4 - 23.8        | <b>10.2</b>   | 3.6 - 16.8        |
| Ferrara                     | 2000-2004           | <i>8.2</i>    | <i>2.8 - 13.7</i>  | <b>24.5</b>   | 20.0 - 29.0        | <b>59.1</b>   | 56.2 - 62.1        | <b>55.4</b>   | 49.3 - 61.5        | <b>12.6</b>   | 8.9 - 16.2         | <b>6.2</b>    | 3.2 - 9.1         |

**Web-table 4.1: Age-standardised five-year net survival (NS, %): adults (15-99 years) diagnosed with cancer of the oesophagus, stomach, colon, rectum, liver or pancreas, by continent, country, registry and calendar period of diagnosis (2000-2004, 2005-2009, 2010-2014)**

|               | Period of diagnosis | Oesophagus |             | Stomach |             | Colon  |             | Rectum |             | Liver  |             | Pancreas |             |
|---------------|---------------------|------------|-------------|---------|-------------|--------|-------------|--------|-------------|--------|-------------|----------|-------------|
|               |                     | NS (%)     | 95% CI      | NS (%)  | 95% CI      | NS (%) | 95% CI      | NS (%) | 95% CI      | NS (%) | 95% CI      | NS (%)   | 95% CI      |
| Mantova       | 2000-2004           | 11.0       | 4.5 - 17.4  | 32.0    | 27.7 - 36.4 | 56.5   | 53.3 - 59.8 | 53.3   | 47.6 - 58.9 | 15.5   | 11.5 - 19.4 | 8.4      | 5.4 - 11.4  |
|               | 2005-2009           | 9.5        | 3.4 - 15.5  | 30.7    | 26.1 - 35.2 | 67.5   | 64.6 - 70.3 | 58.0   | 52.8 - 63.3 | 20.9   | 16.3 - 25.5 | 7.9      | 5.0 - 10.7  |
|               | 2010-2014           | 7.4        | 0.0 - 17.7  | 26.8    | 18.8 - 34.7 | 66.1   | 59.8 - 72.5 | 58.1   | 46.8 - 69.4 | 5.4    | 1.3 - 9.5   | 7.3      | 2.1 - 12.5  |
| Milano        | 2000-2004           | 14.2       | 10.7 - 17.6 | 32.8    | 30.2 - 35.4 | 59.5   | 57.7 - 61.3 | 56.5   | 53.6 - 59.4 | 19.5   | 17.1 - 21.9 | 7.9      | 5.9 - 10.0  |
|               | 2005-2009           | 18.2       | 14.9 - 21.4 | 33.7    | 31.7 - 35.8 | 65.8   | 64.5 - 67.0 | 64.8   | 62.6 - 67.0 | 24.2   | 22.3 - 26.1 | 9.2      | 7.7 - 10.7  |
|               | 2010-2014           | 16.6       | 12.4 - 20.8 | 34.9    | 32.0 - 37.7 | 66.7   | 65.0 - 68.5 | 65.5   | 62.4 - 68.6 | 24.8   | 22.2 - 27.4 | 9.7      | 7.7 - 11.7  |
| Modena        | 2000-2004           | 10.8       | 4.6 - 17.0  | 27.2    | 23.7 - 30.6 | 59.0   | 56.4 - 61.6 | 60.4   | 55.7 - 65.0 | 13.7   | 10.6 - 16.7 | 4.6      | 2.6 - 6.6   |
|               | 2005-2009           | 17.0       | 9.6 - 24.3  | 33.9    | 30.2 - 37.7 | 69.0   | 66.7 - 71.3 | 62.8   | 58.1 - 67.5 | 15.9   | 12.5 - 19.3 | 10.1     | 7.0 - 13.2  |
|               | 2010-2014           | 14.3       | 6.8 - 21.9  | 30.4    | 25.7 - 35.2 | 68.2   | 65.2 - 71.1 | 61.9   | 56.0 - 67.8 | 13.5   | 9.7 - 17.4  | 11.3     | 7.6 - 15.1  |
| Monza-Brianza | 2000-2004           | -          | -           | -       | -           | -      | -           | -      | -           | -      | -           | -        | -           |
|               | 2005-2009           | 13.3       | 7.1 - 19.6  | 34.5    | 30.3 - 38.6 | 67.3   | 64.5 - 70.0 | 64.3   | 59.0 - 69.6 | 25.7   | 21.5 - 29.9 | 8.4      | 5.8 - 11.0  |
|               | 2010-2014           | 23.4       | 13.6 - 33.2 | 34.2    | 28.8 - 39.6 | 66.9   | 60.9 - 72.8 | 69.3   | 62.5 - 76.1 | 28.7   | 22.4 - 35.0 | 13.3     | 9.8 - 16.9  |
| Naples        | 2000-2004           | 9.2        | 0.8 - 17.6  | 22.9    | 18.7 - 27.2 | 51.3   | 47.0 - 55.5 | 51.3   | 44.7 - 57.9 | 15.1   | 12.2 - 17.9 | 7.5      | 4.5 - 10.5  |
|               | 2005-2009           | 7.9        | 1.6 - 14.2  | 27.2    | 23.5 - 30.9 | 57.4   | 54.4 - 60.3 | 53.5   | 48.0 - 59.1 | 20.4   | 17.7 - 23.1 | 5.6      | 3.3 - 7.8   |
|               | 2010-2014           | 14.6       | 5.9 - 23.3  | 28.4    | 23.9 - 32.9 | 59.4   | 55.9 - 62.9 | 55.4   | 48.8 - 62.0 | 19.8   | 16.4 - 23.1 | 4.1      | 2.2 - 6.1   |
| Nuoro         | 2000-2004           | 11.9       | 0.0 - 25.6  | 26.4    | 16.1 - 36.7 | 46.4   | 39.2 - 53.7 | 52.7   | 37.8 - 67.5 | 14.2   | 8.5 - 19.9  | 1.8      | 0.0 - 4.5   |
|               | 2005-2009           | 10.0       | 2.0 - 18.0  | 25.7    | 19.6 - 31.8 | 59.6   | 54.9 - 64.2 | 56.2   | 47.5 - 64.8 | 24.5   | 19.3 - 29.7 | 5.4      | 2.4 - 8.4   |
|               | 2010-2014           | 9.0        | 0.0 - 18.8  | 40.3    | 31.4 - 49.1 | 61.2   | 55.3 - 67.2 | 59.2   | 48.3 - 70.2 | 20.7   | 14.9 - 26.6 | 8.2      | 3.6 - 12.7  |
| Palermo       | 2000-2004           | 7.7        | 0.2 - 15.1  | 26.0    | 20.8 - 31.1 | 57.1   | 53.6 - 60.7 | 54.6   | 48.3 - 60.8 | 20.4   | 16.7 - 24.1 | 5.0      | 2.4 - 7.6   |
|               | 2005-2009           | 7.5        | 3.2 - 11.8  | 23.9    | 20.7 - 27.1 | 58.2   | 56.1 - 60.4 | 55.1   | 51.3 - 59.0 | 20.5   | 17.7 - 23.4 | 8.0      | 5.8 - 10.2  |
|               | 2010-2014           | 11.4       | 2.2 - 20.7  | 23.0    | 18.8 - 27.2 | 57.5   | 54.7 - 60.3 | 59.7   | 54.7 - 64.6 | 24.6   | 20.5 - 28.7 | 7.2      | 4.4 - 9.9   |
| Parma         | 2000-2004           | 12.6       | 6.2 - 19.0  | 26.8    | 23.2 - 30.4 | 58.1   | 55.0 - 61.1 | 57.6   | 51.8 - 63.4 | 23.4   | 19.4 - 27.3 | 9.4      | 6.4 - 12.5  |
|               | 2005-2009           | 13.2       | 7.6 - 18.9  | 27.4    | 23.3 - 31.4 | 67.5   | 64.7 - 70.2 | 63.0   | 57.4 - 68.6 | 24.7   | 20.7 - 28.7 | 9.9      | 7.0 - 12.8  |
|               | 2010-2014           | 18.4       | 11.2 - 25.7 | 26.3    | 22.1 - 30.6 | 65.7   | 62.7 - 68.7 | 62.7   | 56.7 - 68.7 | 24.4   | 20.3 - 28.6 | 10.6     | 7.2 - 14.0  |
| Pavia         | 2000-2004           | 19.8       | 7.8 - 31.7  | 27.2    | 21.8 - 32.7 | 62.5   | 58.3 - 66.6 | 50.4   | 42.8 - 57.9 | 20.4   | 16.2 - 24.6 | 6.5      | 3.0 - 10.1  |
|               | 2005-2009           | 16.6       | 10.6 - 22.6 | 28.4    | 24.5 - 32.2 | 63.5   | 60.9 - 66.1 | 53.1   | 48.2 - 57.9 | 20.0   | 16.7 - 23.4 | 9.3      | 6.1 - 12.4  |
|               | 2010-2014           | -          | -           | -       | -           | -      | -           | -      | -           | -      | -           | -        | -           |
| Piacenza      | 2000-2004           | -          | -           | -       | -           | -      | -           | -      | -           | -      | -           | -        | -           |
|               | 2005-2009           | 9.3        | 0.5 - 18.1  | 26.9    | 21.7 - 32.1 | 68.5   | 64.6 - 72.4 | 55.0   | 47.4 - 62.6 | 20.6   | 15.2 - 25.9 | 13.7     | 9.4 - 18.0  |
|               | 2010-2014           | 22.8       | 9.3 - 36.2  | 34.6    | 26.9 - 42.3 | 58.2   | 48.9 - 67.5 | 63.6   | 49.4 - 77.8 | 23.0   | 14.1 - 32.0 | 10.6     | 4.7 - 16.6  |
| Ragusa        | 2000-2004           | 0.0        | 0.0 - 0.1   | 27.1    | 20.9 - 33.4 | 54.9   | 50.0 - 59.7 | 58.0   | 51.1 - 64.9 | 7.6    | 4.6 - 10.5  | 6.9      | 3.3 - 10.6  |
|               | 2005-2009           | 9.7        | 0.1 - 19.4  | 25.0    | 19.8 - 30.2 | 59.0   | 55.5 - 62.5 | 54.7   | 48.9 - 60.6 | 16.3   | 12.3 - 20.3 | 4.3      | 1.8 - 6.9   |
|               | 2010-2014           | 6.2        | 0.0 - 13.9  | 22.4    | 16.4 - 28.4 | 59.5   | 55.4 - 63.5 | 54.3   | 47.2 - 61.4 | 11.8   | 7.5 - 16.2  | 4.2      | 1.8 - 6.6   |
| Reggio Emilia | 2000-2004           | 15.0       | 7.1 - 22.8  | 33.5    | 29.6 - 37.5 | 63.2   | 60.2 - 66.3 | 60.4   | 55.0 - 65.8 | 16.4   | 12.5 - 20.3 | 9.3      | 6.3 - 12.4  |
|               | 2005-2009           | 19.4       | 10.8 - 28.0 | 32.2    | 27.9 - 36.5 | 73.0   | 70.2 - 75.8 | 67.4   | 62.4 - 72.5 | 18.3   | 14.0 - 22.7 | 7.8      | 5.1 - 10.5  |
|               | 2010-2014           | 14.1       | 4.2 - 24.1  | 28.7    | 23.5 - 34.0 | 70.7   | 66.9 - 74.5 | 67.4   | 60.1 - 74.7 | 18.1   | 12.7 - 23.5 | 9.2      | 4.7 - 13.7  |
| Romagna       | 2000-2004           | 11.8       | 6.4 - 17.2  | 37.4    | 35.0 - 39.7 | 60.7   | 58.8 - 62.6 | 61.3   | 57.5 - 65.1 | 12.6   | 9.5 - 15.7  | 7.9      | 5.6 - 10.1  |
|               | 2005-2009           | 7.2        | 3.4 - 11.1  | 36.6    | 34.1 - 39.1 | 67.8   | 66.1 - 69.5 | 68.1   | 65.0 - 71.3 | 21.4   | 18.0 - 24.7 | 9.0      | 6.9 - 11.1  |
|               | 2010-2014           | 5.7        | 1.7 - 9.8   | 36.9    | 33.5 - 40.3 | 66.9   | 64.6 - 69.1 | 64.0   | 59.9 - 68.1 | 21.1   | 17.2 - 25.0 | 10.3     | 7.5 - 13.2  |
| Salerno       | 2000-2004           | 3.2        | 0.0 - 6.7   | 28.8    | 25.4 - 32.2 | 56.2   | 53.6 - 58.8 | 48.2   | 43.8 - 52.7 | 12.1   | 9.4 - 14.8  | 6.4      | 4.0 - 8.9   |
|               | 2005-2009           | 11.0       | 4.5 - 17.5  | 31.6    | 28.0 - 35.2 | 59.9   | 57.6 - 62.3 | 55.8   | 51.2 - 60.4 | 16.0   | 13.0 - 18.9 | 8.8      | 6.3 - 11.4  |
|               | 2010-2014           | -          | -           | -       | -           | -      | -           | -      | -           | -      | -           | -        | -           |
| Sassari       | 2000-2004           | 3.8        | 0.0 - 7.6   | 32.2    | 26.8 - 37.5 | 54.4   | 50.6 - 58.1 | 51.0   | 44.5 - 57.5 | 17.3   | 13.4 - 21.2 | 6.0      | 3.6 - 8.5   |
|               | 2005-2009           | 13.5       | 7.5 - 19.5  | 26.5    | 21.5 - 31.4 | 57.6   | 54.2 - 61.1 | 54.9   | 48.8 - 60.9 | 17.7   | 13.9 - 21.5 | 6.6      | 4.2 - 9.1   |
|               | 2010-2014           | 13.8       | 1.8 - 25.9  | 28.9    | 20.6 - 37.2 | 55.3   | 50.4 - 60.3 | 54.1   | 44.0 - 64.2 | 12.4   | 7.6 - 17.1  | 9.4      | 4.8 - 14.1  |
| Siracusa      | 2000-2004           | 3.4        | 0.0 - 8.7   | 28.8    | 22.8 - 34.7 | 58.7   | 54.5 - 62.9 | 53.6   | 46.6 - 60.5 | 13.0   | 9.2 - 16.8  | 3.7      | 1.3 - 6.1   |
|               | 2005-2009           | 9.0        | 0.0 - 18.3  | 21.9    | 16.8 - 27.1 | 64.3   | 60.6 - 68.1 | 56.7   | 49.7 - 63.8 | 22.1   | 17.7 - 26.6 | 5.4      | 3.0 - 7.8   |
|               | 2010-2014           | 3.6        | 0.0 - 9.7   | 20.5    | 13.9 - 27.1 | 60.4   | 55.6 - 65.1 | 56.9   | 47.6 - 66.3 | 23.7   | 17.3 - 30.2 | 3.5      | 1.0 - 6.0   |
| Sondrio       | 2000-2004           | 10.6       | 3.4 - 17.7  | 31.8    | 26.2 - 37.4 | 56.2   | 51.0 - 61.4 | 50.7   | 40.4 - 60.9 | 15.8   | 11.0 - 20.6 | 6.3      | 2.8 - 9.7   |
|               | 2005-2009           | 12.3       | 4.1 - 20.5  | 34.0    | 27.7 - 40.3 | 64.9   | 60.2 - 69.5 | 56.3   | 48.2 - 64.5 | 18.5   | 12.9 - 24.1 | 3.7      | 1.5 - 6.0   |
|               | 2010-2014           | 11.9       | 0.3 - 23.5  | 37.8    | 28.5 - 47.0 | 65.2   | 58.1 - 72.2 | 51.2   | 38.4 - 63.9 | 21.8   | 12.5 - 31.0 | 6.9      | 2.5 - 11.4  |
| Taranto       | 2000-2004           | -          | -           | -       | -           | -      | -           | -      | -           | -      | -           | -        | -           |
|               | 2005-2009           | 9.4        | 0.1 - 18.6  | 26.8    | 21.9 - 31.7 | 61.1   | 57.7 - 64.6 | 65.6   | 59.1 - 72.2 | 22.3   | 17.9 - 26.6 | 6.4      | 3.5 - 9.3   |
|               | 2010-2014           | 8.1        | 0.0 - 18.6  | 21.5    | 14.7 - 28.2 | 61.1   | 56.0 - 66.2 | 53.1   | 44.8 - 61.4 | 24.2   | 17.9 - 30.5 | 4.5      | 0.8 - 8.1   |
| Trapani       | 2000-2004           | 7.7        | 0.0 - 17.8  | 23.6    | 17.0 - 30.1 | 55.3   | 50.1 - 60.5 | 54.6   | 47.3 - 62.0 | 10.3   | 5.4 - 15.1  | 3.3      | 0.3 - 6.3   |
|               | 2005-2009           | 2.3        | 0.0 - 5.9   | 18.8    | 13.8 - 23.7 | 56.3   | 52.5 - 60.1 | 54.9   | 48.3 - 61.5 | 11.5   | 7.3 - 15.7  | 7.6      | 4.0 - 11.2  |
|               | 2010-2014           | -          | -           | 27.3    | 15.6 - 39.0 | 52.2   | 43.7 - 60.7 | 52.7   | 39.2 - 66.1 | 6.1    | 0.0 - 12.9  | 21.8     | 13.1 - 30.6 |
| Trento        | 2000-2004           | 13.7       | 9.4 - 17.9  | 34.5    | 30.3 - 38.7 | 58.6   | 55.2 - 62.1 | 52.5   | 46.7 - 58.3 | 12.1   | 9.0 - 15.2  | 5.0      | 2.8 - 7.2   |
|               | 2005-2009           | 12.2       | 7.3 - 17.1  | 32.3    | 27.6 - 36.9 | 64.1   | 61.1 - 67.2 | 66.9   | 61.5 - 72.3 | 12.6   | 9.3 - 15.9  | 7.4      | 4.8 - 10.0  |
|               | 2010-2014           | 12.8       | 4.2 - 21.5  | 32.1    | 23.9 - 40.4 | 60.9   | 54.1 - 67.8 | 66.6   | 57.7 - 75.5 | 11.6   | 4.9 - 18.4  | 5.3      | 0.3 - 10.4  |
| Turin         | 2000-2004           | 12.4       | 7.9 - 17.0  | 30.5    | 27.2 - 33.8 | 57.8   | 55.6 - 60.0 | 55.7   | 52.0 - 59.4 | 17.3   | 14.3 - 20.2 | 7.2      | 5.1 - 9.4   |
|               | 2005-2009           | 12.2       | 7.7 - 16.7  | 30.1    | 26.7 - 33.5 | 64.1   | 62.0 - 66.2 | 61.5   | 57.9 - 65.2 | 20.0   | 16.8 - 23.1 | 9.1      | 6.7 - 11.5  |
|               | 2010-2014           | 16.2       | 8.0 - 24.4  | 27.2    | 22.8 - 31.5 | 64.2   | 61.4 - 66.9 | 63.0   | 58.0 - 68.0 | 25.5   | 21.0 - 30.1 | 10.2     | 6.8 - 13.7  |
| Tuscany       | 2000-2004           | 11.4       | 6.5 - 16.2  | 30.7    | 28.3 - 33.1 | 61.6   | 59.8 - 63.4 | 55.6   | 52.5 - 58.7 | 14.1   | 11.3 - 16.9 | 6.2      | 4.3 - 8.2   |
|               | 2005-2009           | 12.6       | 7.5 - 17.7  | 30.5    | 27.8 - 33.2 | 67.6   | 65.8 - 69.4 | 65.8   | 62.7 - 68.8 | 18.7   | 15.6 - 21.8 | 8.8      | 6.6 - 11.1  |
|               | 2010-2014           | -          | -           | -       | -           | -      | -           | -      | -           | -      | -           | -        | -           |
| Umbria        | 2000-2004           | 12.3       | 7.1 - 17.4  | 35.1    | 32.5 - 37.8 | 60.8   | 58.6 - 63.1 | 54.3   | 50.7 - 57.8 | 15.9   | 12.9 - 19.0 | 8.4      | 5.9 - 11.0  |
|               | 2005-2009           | 12.2       | 6.2 - 18.2  | 36.2    | 33.3 - 39.0 | 66.5   | 64.5 - 68.5 | 62.8   | 59.4 - 66.1 | 17.1   | 13.7 - 20.5 | 7.1      | 5.0 - 9.3   |
|               | 2010-2014           | 19.3       | 11.2 - 27.4 | 35.9    | 32.7 - 39.1 | 68.9   | 66.7 - 71.1 | 63.6   | 59.7 - 67.4 | 18.9   | 15.3 - 22.5 | 9.1      | 6.2 - 12.0  |
| Varese        | 2000-2004           | 8.2        | 4.4 - 12.0  | 33.5    | 30.5 - 36.6 | 60.1   | 57.7 - 62.5 | 56.5   | 52.2 - 60.8 | 15.8   | 12.8 - 18.8 | 9.0      | 6.5 - 11.4  |
|               | 2005-2009           | 10.7       | 6.7 - 14.8  | 33.9    | 30.5 - 37.3 | 67.3   | 65.1 - 69.4 | 60.9   | 56.7 - 65.1 | 19.8   | 16.5 - 23.0 | 7.9      | 5.4 - 10.5  |
|               | 2010-2014           | 13.9       | 8.5 - 19.2  | 33.8    | 29.4 - 38.2 | 67.9   | 65.1 - 70.6 | 57.9   | 52.5 - 63.3 | 17.3   | 13.4 - 21.1 | 11.7     | 7.8 - 15.6  |
| Veneto        | 2000-2004           | 12.6       | 10.2 - 15.0 | 32.1    | 30          |        |             |        |             |        |             |          |             |

**Web-table 4.1: Age-standardised five-year net survival (NS, %): adults (15-99 years) diagnosed with cancer of the oesophagus, stomach, colon, rectum, liver or pancreas, by continent, country, registry and calendar period of diagnosis (2000-2004, 2005-2009, 2010-2014)**

|                             | Period of diagnosis | Oesophagus |             | Stomach |             | Colon  |             | Rectum |             | Liver  |             | Pancreas |             |
|-----------------------------|---------------------|------------|-------------|---------|-------------|--------|-------------|--------|-------------|--------|-------------|----------|-------------|
|                             |                     | NS (%)     | 95% CI      | NS (%)  | 95% CI      | NS (%) | 95% CI      | NS (%) | 95% CI      | NS (%) | 95% CI      | NS (%)   | 95% CI      |
| Latvia *                    | 2000-2004           | 6.9        | 3.4 - 10.3  | 24.2    | 22.2 - 26.3 | 50.5   | 47.8 - 53.3 | 39.4   | 36.3 - 42.5 | 12.0   | 3.8 - 20.3  | 8.8      | 5.4 - 12.1  |
|                             | 2005-2009           | 10.8       | 7.3 - 14.2  | 26.7    | 24.6 - 28.9 | 54.0   | 51.4 - 56.5 | 46.6   | 43.4 - 49.7 | 7.8    | 3.8 - 11.7  | 11.2     | 7.5 - 14.8  |
|                             | 2010-2014           | 6.1        | 3.6 - 8.6   | 28.0    | 25.7 - 30.3 | 56.5   | 54.0 - 58.9 | 53.3   | 50.2 - 56.5 | 12.9   | 7.7 - 18.0  | 13.7     | 9.3 - 18.1  |
| Lithuania *                 | 2000-2004           | 4.7        | 2.9 - 6.4   | 22.0    | 20.7 - 23.3 | 44.5   | 42.6 - 46.3 | 40.6   | 38.4 - 42.8 | 7.9    | 5.6 - 10.2  | 6.5      | 5.3 - 7.7   |
|                             | 2005-2009           | 6.2        | 4.2 - 8.1   | 24.9    | 23.4 - 26.4 | 51.1   | 49.2 - 53.0 | 48.8   | 46.6 - 51.1 | 8.3 §  | 5.9 - 10.7  | 5.4 §    | 4.3 - 6.5   |
|                             | 2010-2014           | 5.6        | 3.3 - 7.8   | 27.0    | 24.9 - 29.0 | 56.9   | 54.4 - 59.4 | 52.7   | 49.7 - 55.7 | 8.0 §  | 5.3 - 10.7  | 7.0 §    | 5.2 - 8.8   |
| Malta *                     | 2000-2004           | 7.8        | 0.0 - 15.6  | 19.9    | 14.6 - 25.2 | 57.0   | 51.9 - 62.2 | 55.1   | 47.7 - 62.5 | 4.2    | 0.0 - 10.5  | 5.9      | 3.0 - 8.7   |
|                             | 2005-2009           | 6.1        | 0.5 - 11.8  | 24.8    | 19.3 - 30.3 | 52.9   | 48.5 - 57.4 | 53.8   | 47.2 - 60.5 | 0.0 §  | 0.0 - 0.0   | 2.2 §    | 0.5 - 4.0   |
|                             | 2010-2014           | 11.2       | 1.6 - 20.8  | 23.8    | 17.5 - 30.0 | 57.5   | 52.6 - 62.3 | 56.1   | 49.2 - 62.9 | 0.0 §  | 0.0 - 0.0   | 5.5 §    | 2.7 - 8.3   |
| Netherlands *               | 2000-2004           | 12.1       | 11.2 - 13.0 | 19.7    | 18.8 - 20.6 | 58.1   | 57.4 - 58.7 | 58.0   | 57.0 - 59.1 | 10.1   | 8.6 - 11.7  | 3.7      | 3.2 - 4.2   |
|                             | 2005-2009           | 16.8       | 15.8 - 17.7 | 22.9    | 22.0 - 23.9 | 60.9   | 60.3 - 61.5 | 63.1   | 62.2 - 64.0 | 13.4   | 11.8 - 14.9 | 5.5      | 5.0 - 6.1   |
|                             | 2010-2014           | 21.0       | 20.0 - 22.0 | 25.0    | 24.0 - 26.0 | 63.1   | 62.5 - 63.7 | 65.3   | 64.5 - 66.2 | 15.8   | 14.2 - 17.4 | 7.4      | 6.8 - 8.1   |
| Norway *                    | 2000-2004           | 9.0        | 6.7 - 11.3  | 22.4    | 20.5 - 24.2 | 60.0   | 58.8 - 61.2 | 62.4   | 60.8 - 64.1 | 7.9    | 5.4 - 10.3  | 5.0      | 3.9 - 6.0   |
|                             | 2005-2009           | 13.3       | 10.8 - 15.8 | 25.3    | 23.3 - 27.4 | 64.3   | 63.2 - 65.4 | 66.8   | 65.1 - 68.4 | 14.2   | 11.2 - 17.2 | 6.1      | 5.0 - 7.2   |
|                             | 2010-2014           | 16.5       | 14.0 - 19.0 | 26.5    | 24.4 - 28.6 | 66.7   | 65.6 - 67.8 | 69.2   | 67.6 - 70.8 | 18.7   | 15.5 - 22.0 | 9.5      | 8.0 - 11.0  |
| Poland *<br>(16 registries) | 2000-2004           | 7.2        | 6.3 - 8.1   | 15.9    | 15.2 - 16.5 | 45.3   | 44.6 - 45.9 | 42.5   | 41.8 - 43.3 | 9.5    | 8.5 - 10.5  | 8.2      | 7.6 - 8.8   |
|                             | 2005-2009           | 8.9        | 7.9 - 9.8   | 19.9    | 19.3 - 20.4 | 51.1   | 50.5 - 51.6 | 47.6   | 46.9 - 48.3 | 10.7   | 9.8 - 11.7  | 9.7      | 9.2 - 10.3  |
|                             | 2010-2014           | 9.1        | 8.1 - 10.1  | 20.9    | 20.3 - 21.4 | 52.9   | 52.3 - 53.4 | 48.4   | 47.7 - 49.1 | 10.8   | 9.9 - 11.8  | 8.0      | 7.5 - 8.5   |
| Greater Poland              | 2000-2004           | 4.8        | 2.7 - 6.9   | 16.2 §  | 14.4 - 18.0 | 46.0   | 43.9 - 48.1 | 42.5   | 40.0 - 45.0 | 8.8 §  | 6.2 - 11.4  | 5.2 §    | 3.8 - 6.6   |
|                             | 2005-2009           | 5.6        | 3.4 - 7.9   | 20.4    | 18.6 - 22.3 | 49.3   | 47.5 - 51.1 | 49.4   | 47.0 - 51.7 | 9.8 §  | 7.2 - 12.3  | 7.8      | 6.1 - 9.5   |
|                             | 2010-2014           | 8.5        | 5.8 - 11.3  | 20.2    | 18.5 - 22.0 | 50.5   | 48.8 - 52.1 | 48.7   | 46.4 - 51.0 | 9.8 §  | 7.4 - 12.3  | 5.4      | 4.2 - 6.7   |
| Holy Cross                  | 2000-2004           | 9.7        | 4.8 - 14.5  | 15.3    | 13.0 - 17.6 | 46.3   | 43.2 - 49.5 | 42.3   | 38.8 - 45.8 | 6.6    | 3.2 - 9.9   | 6.9      | 4.9 - 8.9   |
|                             | 2005-2009           | 4.1        | 1.6 - 6.6   | 17.3    | 14.8 - 19.9 | 48.0   | 45.1 - 50.9 | 45.7   | 42.1 - 49.4 | 12.0   | 7.0 - 17.0  | 6.0      | 4.0 - 8.0   |
|                             | 2010-2014           | 3.0        | 1.0 - 5.0   | 19.2    | 16.4 - 22.0 | 51.7   | 48.9 - 54.5 | 46.5   | 43.0 - 50.1 | 10.8   | 6.2 - 15.3  | 4.8      | 3.0 - 6.6   |
| Kuiavia-Pomerania           | 2000-2004           | 12.1       | 7.6 - 16.5  | 18.0    | 15.5 - 20.5 | 49.0   | 46.2 - 51.8 | 45.0   | 41.4 - 48.5 | 8.6    | 4.6 - 12.6  | 4.9      | 3.1 - 6.7   |
|                             | 2005-2009           | 7.5        | 4.4 - 10.5  | 16.8    | 14.7 - 18.8 | 48.6   | 46.3 - 50.9 | 47.7   | 44.7 - 50.6 | 11.4   | 8.0 - 14.7  | 7.5      | 5.6 - 9.4   |
|                             | 2010-2014           | 6.9        | 4.3 - 9.4   | 19.3    | 17.0 - 21.5 | 49.9   | 47.7 - 52.1 | 47.8   | 44.9 - 50.7 | 16.6   | 12.5 - 20.6 | 6.7      | 4.8 - 8.5   |
| Lesser Poland               | 2000-2004           | 6.8        | 4.1 - 9.5   | 16.4 §  | 14.7 - 18.0 | 45.0   | 42.8 - 47.1 | 40.9   | 38.6 - 43.3 | 11.2 § | 8.5 - 13.8  | 9.0 §    | 7.2 - 10.7  |
|                             | 2005-2009           | 7.1        | 4.3 - 9.8   | 19.6    | 17.8 - 21.4 | 49.7   | 47.8 - 51.6 | 48.4   | 46.0 - 50.8 | 9.5    | 7.1 - 11.9  | 8.6      | 6.9 - 10.2  |
|                             | 2010-2014           | 10.3       | 6.8 - 13.7  | 22.8    | 20.9 - 24.6 | 52.1   | 50.3 - 54.0 | 49.4   | 47.0 - 51.7 | 10.9   | 8.1 - 13.7  | 7.6      | 6.0 - 9.1   |
| Łódź                        | 2000-2004           | 8.4        | 4.8 - 11.9  | 12.9    | 10.9 - 14.9 | 38.0   | 35.5 - 40.4 | 34.8   | 31.9 - 37.7 | 9.3    | 6.3 - 12.3  | 8.9      | 6.8 - 10.9  |
|                             | 2005-2009           | 15.6       | 11.5 - 19.7 | 21.3    | 19.1 - 23.4 | 49.3   | 47.2 - 51.4 | 43.2   | 40.6 - 45.9 | 16.9   | 13.3 - 20.4 | 14.9     | 12.7 - 17.2 |
|                             | 2010-2014           | 11.7       | 8.4 - 15.0  | 20.1    | 18.0 - 22.1 | 50.2   | 48.2 - 52.3 | 44.1   | 41.4 - 46.8 | 15.1   | 12.0 - 18.3 | 8.2      | 6.5 - 9.9   |
| Lower Silesia               | 2000-2004           | 5.8        | 3.6 - 7.9   | 15.2    | 13.5 - 16.9 | 45.0   | 43.0 - 47.0 | 43.8   | 41.3 - 46.3 | 10.1   | 7.7 - 12.5  | 9.2      | 7.6 - 10.8  |
|                             | 2005-2009           | 4.7        | 2.7 - 6.8   | 16.5    | 14.8 - 18.2 | 49.6   | 47.7 - 51.5 | 47.9   | 45.5 - 50.2 | 7.4    | 5.5 - 9.2   | 5.5      | 4.2 - 6.8   |
|                             | 2010-2014           | 3.8        | 2.0 - 5.5   | 18.4    | 16.6 - 20.3 | 52.5   | 50.7 - 54.3 | 49.2   | 46.9 - 51.6 | 7.8    | 5.8 - 9.8   | 4.9      | 3.7 - 6.2   |
| Lublin                      | 2000-2004           | 12.7       | 7.8 - 17.6  | 14.9 §  | 12.7 - 17.1 | 47.0 § | 44.1 - 49.9 | 42.2   | 39.0 - 45.3 | 9.9 §  | 6.6 - 13.2  | 6.8 §    | 4.9 - 8.6   |
|                             | 2005-2009           | 8.1        | 3.9 - 12.3  | 22.3    | 19.8 - 24.8 | 52.5   | 50.2 - 54.9 | 46.1   | 43.3 - 48.9 | 7.9    | 5.1 - 10.7  | 8.3      | 6.4 - 10.2  |
|                             | 2010-2014           | 7.1        | 3.4 - 10.7  | 22.4    | 19.9 - 24.8 | 54.6   | 52.3 - 56.9 | 45.3   | 42.5 - 48.1 | 8.1    | 5.0 - 11.2  | 10.2     | 7.9 - 12.5  |
| Lubush                      | 2000-2004           | 6.9        | 2.4 - 11.4  | 13.2    | 10.4 - 16.0 | 42.7   | 38.7 - 46.7 | 40.5   | 35.8 - 45.1 | 8.4    | 4.1 - 12.7  | 7.5      | 4.4 - 10.5  |
|                             | 2005-2009           | 17.8       | 10.6 - 25.0 | 21.5    | 18.2 - 24.8 | 53.9   | 50.6 - 57.1 | 49.2   | 45.2 - 53.3 | 10.0   | 5.4 - 14.6  | 13.9     | 10.4 - 17.5 |
|                             | 2010-2014           | 17.7       | 10.6 - 24.9 | 23.4    | 19.9 - 26.9 | 56.1   | 52.8 - 59.3 | 46.0   | 41.9 - 50.0 | 7.6    | 3.7 - 11.5  | 6.6      | 4.1 - 9.1   |
| Mazovia                     | 2000-2004           | 5.9        | 4.0 - 7.8   | 16.8    | 15.3 - 18.3 | 48.6   | 47.0 - 50.2 | 48.8   | 46.7 - 50.9 | 12.4   | 9.9 - 14.9  | 6.6      | 5.3 - 7.8   |
|                             | 2005-2009           | 8.2        | 5.8 - 10.6  | 20.3    | 18.7 - 21.9 | 54.1   | 52.6 - 55.6 | 51.9   | 49.8 - 53.9 | 13.2   | 10.5 - 15.9 | 10.4     | 8.9 - 12.0  |
|                             | 2010-2014           | 10.5       | 7.7 - 13.4  | 21.8    | 20.0 - 23.5 | 54.3   | 52.8 - 55.8 | 54.2   | 52.1 - 56.2 | 12.5   | 10.0 - 15.1 | 10.1     | 8.6 - 11.5  |
| Opole                       | 2000-2004           | 4.6        | 1.9 - 7.3   | 13.2    | 10.6 - 15.8 | 42.3   | 38.8 - 45.9 | 38.9   | 35.1 - 42.6 | 6.8    | 2.7 - 10.9  | 5.0      | 2.8 - 7.2   |
|                             | 2005-2009           | 10.7       | 6.0 - 15.3  | 15.1    | 12.4 - 17.9 | 52.0   | 48.8 - 55.1 | 39.9   | 35.9 - 43.9 | 9.0    | 4.5 - 13.5  | 8.1      | 5.4 - 10.9  |
|                             | 2010-2014           | 6.6        | 2.7 - 10.4  | 21.3    | 17.8 - 24.8 | 51.2   | 48.2 - 54.3 | 43.0   | 39.1 - 46.8 | 12.7   | 7.6 - 17.9  | 8.2      | 5.6 - 10.8  |
| Podlahaia                   | 2000-2004           | 3.7        | 1.1 - 6.3   | 12.8 §  | 10.4 - 15.3 | 44.1   | 40.6 - 47.5 | 35.3   | 31.5 - 39.1 | 9.5 §  | 5.7 - 13.4  | 5.9 §    | 3.6 - 8.2   |
|                             | 2005-2009           | 11.9       | 7.2 - 16.5  | 24.5    | 21.2 - 27.9 | 49.5   | 46.6 - 52.5 | 49.5   | 45.6 - 53.5 | 13.2 § | 8.6 - 17.8  | 19.0     | 15.0 - 23.1 |
|                             | 2010-2014           | 10.7       | 6.3 - 15.1  | 24.8    | 21.4 - 28.2 | 54.2   | 51.2 - 57.2 | 51.9   | 48.0 - 55.7 | 16.3 § | 10.6 - 22.1 | 12.1     | 8.7 - 15.4  |
| Pomerania                   | 2000-2004           | 9.7 §      | 6.1 - 13.2  | 14.2 §  | 12.1 - 16.3 | 46.9 § | 44.3 - 49.5 | 42.5   | 39.3 - 45.7 | 5.9 §  | 3.4 - 8.4   | 6.3 §    | 4.5 - 8.2   |
|                             | 2005-2009           | 7.6 §      | 4.8 - 10.4  | 21.3 §  | 18.9 - 23.6 | 55.7   | 53.5 - 57.9 | 50.1   | 47.1 - 53.1 | 11.2 § | 8.0 - 14.4  | 8.3 §    | 6.4 - 10.2  |
|                             | 2010-2014           | 10.1 §     | 6.9 - 13.3  | 23.4 §  | 21.0 - 25.7 | 57.8   | 55.7 - 59.9 | 50.7   | 47.9 - 53.5 | 13.7 § | 10.2 - 17.2 | 6.9 §    | 5.1 - 8.8   |
| Silesia                     | 2000-2004           | 7.2        | 5.1 - 9.4   | 16.6    | 15.3 - 17.9 | 44.1   | 42.5 - 45.7 | 39.7   | 37.6 - 41.7 | 7.3    | 5.7 - 8.9   | 9.7      | 8.3 - 11.1  |
|                             | 2005-2009           | 6.5        | 4.6 - 8.4   | 18.5    | 17.1 - 19.9 | 48.1   | 46.6 - 49.6 | 43.1   | 41.2 - 45.0 | 7.7    | 5.9 - 9.6   | 7.8      | 6.5 - 9.1   |
|                             | 2010-2014           | 6.5        | 4.6 - 8.4   | 18.5    | 17.0 - 19.9 | 51.1   | 49.6 - 52.6 | 44.4   | 42.4 - 46.4 | 8.1    | 6.1 - 10.0  | 6.7      | 5.5 - 7.8   |
| Subcarpathia                | 2000-2004           | 6.4        | 3.5 - 9.3   | 16.6    | 14.6 - 18.6 | 42.9   | 40.3 - 45.6 | 41.4   | 38.3 - 44.4 | 10.0 § | 6.8 - 13.2  | 8.9      | 6.9 - 10.9  |
|                             | 2005-2009           | 6.6        | 3.5 - 9.7   | 17.8    | 15.7 - 19.9 | 50.4   | 48.0 - 52.8 | 47.1   | 44.2 - 50.0 | 10.3 § | 7.2 - 13.4  | 10.0     | 7.9 - 12.0  |
|                             | 2010-2014           | 7.7        | 4.4 - 11.1  | 20.8    | 18.5 - 23.1 | 55.4   | 53.0 - 57.9 | 49.1   | 46.2 - 51.9 | 12.2 § | 8.5 - 15.9  | 9.8      | 7.8 - 11.7  |
| Warmia-Mazuria              | 2000-2004           | 7.7        | 3.7 - 11.8  | 17.0    | 14.2 - 19.8 | 50.3   | 46.8 - 53.9 | 46.5   | 42.4 - 50.5 | 15.5   | 10.3 - 20.7 | 8.1      | 4.9 - 11.3  |
|                             | 2005-2009           | 14.6       | 9.2 - 20.0  | td      |             |        |             |        |             |        |             |          |             |

**Web-table 4.1: Age-standardised five-year net survival (NS, %): adults (15-99 years) diagnosed with cancer of the oesophagus, stomach, colon, rectum, liver or pancreas, by continent, country, registry and calendar period of diagnosis (2000-2004, 2005-2009, 2010-2014)**

|                                   | Period of diagnosis | Oesophagus |             | Stomach |             | Colon  |             | Rectum |             | Liver  |             | Pancreas |            |
|-----------------------------------|---------------------|------------|-------------|---------|-------------|--------|-------------|--------|-------------|--------|-------------|----------|------------|
|                                   |                     | NS (%)     | 95% CI      | NS (%)  | 95% CI      | NS (%) | 95% CI      | NS (%) | 95% CI      | NS (%) | 95% CI      | NS (%)   | 95% CI     |
| Romania (Cluj)                    | 2000-2004           |            | -           |         | -           |        | -           |        | -           |        | -           |          | -          |
|                                   | 2005-2009           | 10.2 §     | 4.4 - 16.0  | 19.3 §  | 16.0 - 22.7 | 53.5 § | 48.9 - 58.0 | 44.8   | 38.9 - 50.8 | 4.1 §  | 1.8 - 6.4   | 4.5 §    | 2.2 - 6.7  |
|                                   | 2010-2014           | 0.0 §      | 0.0 - 0.1   | 26.0 §  | 21.5 - 30.5 | 52.2 § | 46.0 - 58.4 | 58.4   | 49.8 - 67.0 | 13.2 § | 9.2 - 17.3  | 6.0 §    | 2.6 - 9.3  |
| Russian Federation (5 registries) | 2000-2004           | 10.9       | 8.8 - 13.0  | 22.9    | 21.7 - 24.1 | 40.4   | 38.9 - 41.9 | 38.5   | 36.4 - 40.6 | 7.4    | 5.2 - 9.5   | 7.5      | 6.0 - 9.1  |
|                                   | 2005-2009           | 8.6        | 7.0 - 10.2  | 20.2    | 19.3 - 21.1 | 42.4   | 41.2 - 43.6 | 38.9   | 37.3 - 40.5 | 5.1    | 3.6 - 6.6   | 5.4      | 4.5 - 6.4  |
|                                   | 2010-2014           | 8.6        | 7.1 - 10.1  | 21.0    | 20.0 - 21.9 | 44.9   | 43.8 - 46.1 | 41.9   | 40.2 - 43.5 | 6.3    | 4.8 - 7.9   | 4.4      | 3.7 - 5.2  |
| Arkhangelsk                       | 2000-2004           | 7.9        | 5.1 - 10.7  | 19.5    | 17.2 - 21.8 | 33.0   | 29.9 - 36.0 | 27.4   | 23.6 - 31.3 | 5.4    | 2.5 - 8.3   | 3.8      | 2.1 - 5.5  |
|                                   | 2005-2009           | 7.2        | 4.8 - 9.6   | 18.5    | 16.7 - 20.4 | 36.8   | 34.1 - 39.5 | 35.3   | 31.4 - 39.1 | 1.9    | 0.4 - 3.4   | 5.6      | 3.7 - 7.6  |
|                                   | 2010-2014           | 8.7        | 6.1 - 11.2  | 18.6    | 16.8 - 20.5 | 37.8   | 35.1 - 40.4 | 34.0   | 30.3 - 37.6 | 4.1    | 2.0 - 6.1   | 5.4      | 3.5 - 7.3  |
| Karelia                           | 2000-2004           | 14.4       | 9.1 - 19.6  | 27.7    | 24.4 - 31.0 | 46.5   | 41.8 - 51.3 | 43.6   | 37.3 - 49.8 | 8.2    | 2.2 - 14.3  | 7.9      | 4.0 - 11.8 |
|                                   | 2005-2009           | 10.0       | 6.4 - 13.6  | 28.8    | 25.5 - 32.1 | 51.0   | 47.0 - 55.1 | 40.8   | 35.4 - 46.2 | 11.1   | 5.0 - 17.2  | 8.5      | 4.5 - 12.5 |
|                                   | 2010-2014           | 7.1        | 3.8 - 10.4  | 28.9    | 25.6 - 32.2 | 50.7   | 46.9 - 54.5 | 42.6   | 36.8 - 48.5 | 12.2   | 5.4 - 19.1  | 5.2      | 2.7 - 7.7  |
| Omsk                              | 2000-2004           | 6.8        | 3.1 - 10.5  | 23.0    | 19.7 - 26.2 | 50.9   | 46.4 - 55.4 | 46.8   | 40.6 - 53.0 | 7.7    | 0.0 - 15.5  | 7.7      | 3.3 - 12.1 |
|                                   | 2005-2009           | 8.6        | 4.6 - 12.6  | 21.5    | 19.3 - 23.7 | 49.7   | 46.9 - 52.5 | 45.5   | 41.9 - 49.1 | 8.4    | 5.1 - 11.8  | 5.7      | 3.8 - 7.6  |
|                                   | 2010-2014           | 5.2        | 2.1 - 8.4   | 18.1    | 16.1 - 20.1 | 47.5   | 44.8 - 50.2 | 43.4   | 39.8 - 46.9 | 7.0    | 3.5 - 10.4  | 4.6      | 2.9 - 6.2  |
| Samara                            | 2000-2004           | 12.9       | 9.4 - 16.4  | 23.2    | 21.6 - 24.8 | 39.3   | 37.3 - 41.3 | 40.0   | 37.2 - 42.9 | 7.3    | 4.6 - 10.0  | 8.7      | 6.5 - 10.9 |
|                                   | 2005-2009           | 7.9        | 5.2 - 10.5  | 18.4    | 17.0 - 19.7 | 40.5   | 38.7 - 42.2 | 38.4   | 36.1 - 40.8 | 3.8    | 2.2 - 5.5   | 3.3      | 2.2 - 4.3  |
|                                   | 2010-2014           | 10.0       | 6.9 - 13.0  | 20.0    | 18.6 - 21.4 | 46.1   | 44.2 - 47.9 | 45.8   | 43.3 - 48.3 | 5.7    | 3.7 - 7.8   | 3.2      | 2.2 - 4.3  |
| Tomsk                             | 2000-2004           |            | -           |         | -           |        | -           |        | -           |        | -           |          | -          |
|                                   | 2005-2009           | 9.0        | 5.1 - 12.9  | 19.9    | 17.4 - 22.5 | 37.3   | 33.7 - 41.0 | 30.0   | 25.7 - 34.4 | 2.4    | 0.0 - 4.9   | 6.6      | 4.3 - 9.0  |
|                                   | 2010-2014           | 7.6        | 4.2 - 11.1  | 26.1    | 23.0 - 29.2 | 42.3   | 38.6 - 46.0 | 33.1   | 28.5 - 37.7 | 4.6    | 0.0 - 11.5  | 4.2      | 2.4 - 5.9  |
| Slovakia *                        | 2000-2004           | 5.8 §      | 3.8 - 7.9   | 20.6 §  | 19.1 - 22.0 | 50.4   | 49.1 - 51.7 | 43.6   | 41.7 - 45.5 | 5.6 §  | 4.1 - 7.2   | 4.8 §    | 3.8 - 5.8  |
|                                   | 2005-2009           | 6.4        | 4.7 - 8.0   | 20.9    | 19.5 - 22.4 | 51.2   | 50.1 - 52.4 | 47.5   | 45.8 - 49.2 | 6.1 §  | 4.8 - 7.5   | 5.8      | 4.8 - 6.7  |
|                                   | 2010-2014           | 6.4        | 3.3 - 9.4   | 21.1    | 17.8 - 24.3 | 51.8   | 49.1 - 54.4 | 48.6   | 44.9 - 52.4 | 7.6 §  | 4.5 - 10.7  | 6.4      | 4.4 - 8.4  |
| Slovenia *                        | 2000-2004           | 8.2        | 5.7 - 10.8  | 25.9    | 23.8 - 27.9 | 53.6   | 51.6 - 55.6 | 48.6   | 46.1 - 51.1 | 3.8    | 2.2 - 5.4   | 4.7      | 3.4 - 6.1  |
|                                   | 2005-2009           | 9.3        | 6.2 - 12.3  | 25.8    | 23.7 - 27.8 | 56.2   | 54.4 - 58.0 | 57.0   | 54.6 - 59.4 | 7.0    | 5.2 - 8.8   | 5.7      | 4.3 - 7.1  |
|                                   | 2010-2014           | 8.6        | 5.2 - 11.9  | 28.8    | 26.4 - 31.2 | 61.9   | 60.0 - 63.8 | 60.3   | 57.7 - 62.9 | 7.4    | 5.3 - 9.5   | 6.6      | 4.9 - 8.4  |
| Spain (10 registries)             | 2000-2004           | 8.9        | 7.5 - 10.3  | 25.7    | 24.5 - 26.9 | 56.5   | 55.6 - 57.4 | 55.2   | 53.7 - 56.6 | 14.4   | 13.2 - 15.7 | 5.6      | 4.8 - 6.4  |
|                                   | 2005-2009           | 11.6       | 10.2 - 13.1 | 26.7    | 25.5 - 27.9 | 61.1   | 60.3 - 61.9 | 58.6   | 57.3 - 59.9 | 16.3   | 15.1 - 17.4 | 6.9      | 6.1 - 7.7  |
|                                   | 2010-2014           | 13.0       | 10.6 - 15.4 | 27.6    | 25.7 - 29.5 | 63.2   | 62.0 - 64.5 | 59.5   | 57.4 - 61.5 | 17.3   | 15.4 - 19.2 | 7.7      | 6.3 - 9.2  |
| Basque Country                    | 2000-2004           | 9.2        | 7.1 - 11.3  | 26.9    | 24.9 - 28.9 | 55.9   | 54.3 - 57.4 | 55.8   | 53.2 - 58.4 | 17.9   | 15.7 - 20.2 | 6.0      | 4.5 - 7.4  |
|                                   | 2005-2009           | 10.0       | 7.8 - 12.2  | 28.5    | 26.4 - 30.5 | 61.2   | 59.8 - 62.6 | 59.0   | 56.5 - 61.4 | 18.2   | 16.1 - 20.2 | 6.6      | 5.1 - 8.0  |
|                                   | 2010-2014           | 15.3       | 11.9 - 18.7 | 29.3    | 26.9 - 31.6 | 65.6   | 64.2 - 67.1 | 62.2   | 59.6 - 64.9 | 20.6   | 18.0 - 23.1 | 8.8      | 6.7 - 10.8 |
| Canaries                          | 2000-2004           | 8.8        | 5.9 - 11.7  | 22.1    | 18.9 - 25.4 | 55.0   | 52.6 - 57.5 | 50.8   | 46.9 - 54.8 | 11.1   | 8.4 - 13.8  | 5.0      | 3.2 - 6.7  |
|                                   | 2005-2009           | 6.5        | 4.3 - 8.7   | 24.0    | 20.9 - 27.1 | 60.5   | 58.4 - 62.6 | 51.0   | 47.6 - 54.4 | 13.8   | 11.2 - 16.4 | 4.8      | 3.2 - 6.4  |
|                                   | 2010-2014           | 10.0       | 6.3 - 13.7  | 24.3    | 19.3 - 29.2 | 64.5   | 61.3 - 67.7 | 50.7   | 45.3 - 56.2 | 11.7   | 8.0 - 15.4  | 5.4      | 2.9 - 7.9  |
| Girona                            | 2000-2004           | 7.7        | 4.0 - 11.3  | 27.4    | 23.1 - 31.7 | 58.9   | 55.9 - 61.8 | 55.0   | 50.4 - 59.7 | 13.4   | 9.5 - 17.3  | 1.7      | 0.3 - 3.1  |
|                                   | 2005-2009           | 20.8       | 14.9 - 26.7 | 24.6    | 20.6 - 28.7 | 60.1   | 57.4 - 62.7 | 61.0   | 56.7 - 65.3 | 20.0   | 16.0 - 23.9 | 6.5      | 3.7 - 9.3  |
|                                   | 2010-2014           | 18.4       | 12.9 - 24.0 | 24.6    | 20.3 - 28.9 | 63.4   | 60.4 - 66.3 | 61.7   | 56.9 - 66.6 | 22.3   | 17.5 - 27.1 | 7.0      | 3.8 - 10.2 |
| Granada                           | 2000-2004           | 6.2        | 2.4 - 10.0  | 17.5    | 14.0 - 20.9 | 52.7   | 49.6 - 55.9 | 49.0   | 44.2 - 53.9 | 7.4    | 4.6 - 10.2  | 3.0      | 0.9 - 5.0  |
|                                   | 2005-2009           | 10.0       | 5.0 - 15.0  | 21.7    | 18.1 - 25.2 | 56.3   | 53.5 - 59.0 | 53.0   | 48.5 - 57.6 | 11.1   | 7.7 - 14.5  | 6.7      | 4.1 - 9.4  |
|                                   | 2010-2014           | 5.1        | 1.4 - 8.9   | 22.7    | 17.8 - 27.6 | 57.8   | 54.4 - 61.3 | 58.8   | 52.9 - 64.6 | 12.7   | 8.0 - 17.3  | 4.3      | 1.9 - 6.8  |
| Mallorca                          | 2000-2004           | 12.6       | 7.9 - 17.2  | 28.4    | 23.6 - 33.3 | 54.8   | 51.8 - 57.7 | 55.4   | 50.1 - 60.6 | 13.1   | 9.4 - 16.9  | 5.1      | 2.7 - 7.5  |
|                                   | 2005-2009           | 8.8        | 5.2 - 12.4  | 27.6    | 22.9 - 32.3 | 64.1   | 61.3 - 67.0 | 58.1   | 53.5 - 62.7 | 12.5   | 9.1 - 15.9  | 6.3      | 4.0 - 8.6  |
|                                   | 2010-2014           | 13.5       | 7.6 - 19.5  | 31.4    | 25.0 - 37.7 | 65.3   | 61.8 - 68.9 | 60.2   | 54.6 - 65.9 | 9.8    | 6.3 - 13.4  | 5.3      | 2.7 - 7.9  |
| Murcia                            | 2000-2004           | 12.9       | 5.1 - 20.7  | 22.6    | 19.5 - 25.8 | 58.6   | 56.3 - 61.0 | 57.5   | 53.5 - 61.4 | 14.8   | 11.1 - 18.5 | 5.5      | 3.4 - 7.6  |
|                                   | 2005-2009           | 14.7       | 10.1 - 19.3 | 23.1    | 20.1 - 26.2 | 61.9   | 59.8 - 63.9 | 61.3   | 57.5 - 65.0 | 16.1   | 12.8 - 19.4 | 7.7      | 5.5 - 9.9  |
|                                   | 2010-2014           | 11.6       | 3.7 - 19.5  | 21.5    | 15.4 - 27.5 | 62.5   | 58.0 - 67.1 | 65.4   | 56.8 - 74.0 | 19.3   | 12.6 - 26.0 | 12.5     | 7.4 - 17.5 |
| Navarra                           | 2000-2004           | 7.5        | 3.6 - 11.3  | 31.2    | 27.1 - 35.3 | 59.8   | 56.6 - 63.0 | 60.9   | 56.3 - 65.4 | 14.0   | 9.8 - 18.2  | 7.5      | 4.4 - 10.7 |
|                                   | 2005-2009           | 17.5       | 11.9 - 23.0 | 34.7    | 30.1 - 39.2 | 63.2   | 60.4 - 66.0 | 66.9   | 62.7 - 71.1 | 16.9   | 12.4 - 21.5 | 6.7      | 4.2 - 9.3  |
|                                   | 2010-2014           | 24.3       | 11.2 - 37.4 | 41.2    | 30.8 - 51.6 | 63.7   | 57.4 - 70.0 | 67.9   | 58.9 - 77.0 | 20.7   | 12.0 - 29.4 | 8.5      | 3.1 - 14.0 |
| Tarragona                         | 2000-2004           | 7.2        | 3.6 - 10.7  | 27.4    | 22.9 - 31.8 | 57.8   | 55.0 - 60.5 | 53.7   | 48.9 - 58.5 | 14.2   | 10.2 - 18.2 | 8.8      | 5.6 - 11.9 |
|                                   | 2005-2009           | 9.9        | 6.0 - 13.9  | 26.0    | 21.7 - 30.2 | 61.7   | 59.2 - 64.2 | 59.0   | 54.8 - 63.3 | 17.0   | 12.9 - 21.1 | 10.8     | 7.5 - 14.0 |
|                                   | 2010-2014           | 11.1       | 3.8 - 18.4  | 28.9    | 21.8 - 36.0 | 61.9   | 58.0 - 65.8 | 59.9   | 53.1 - 66.8 | 20.8   | 14.4 - 27.2 | 13.5     | 8.6 - 18.4 |
| Spain Childhood                   | 2000-2004           |            | -           |         | -           |        | -           |        | -           |        | -           |          | -          |
|                                   | 2005-2009           |            | -           |         | -           |        | -           |        | -           |        | -           |          | -          |
|                                   | 2010-2014           |            | -           |         | -           |        | -           |        | -           |        | -           |          | -          |
| Valencia Childhood                | 2000-2004           |            | -           |         | -           |        | -           |        | -           |        | -           |          | -          |
|                                   | 2005-2009           |            | -           |         | -           |        | -           |        | -           |        | -           |          | -          |
|                                   | 2010-2014           |            | -           |         | -           |        | -           |        | -           |        | -           |          | -          |
| Sweden *                          | 2000-2004           | 11.4       | 9.6 - 13.1  | 21.2    | 19.8 - 22.6 | 60.2   | 59.2 - 61.2 | 59.9   | 58.7 - 61.1 | 7.8    | 6.4 - 9.1   | 4.9      | 4.1 - 5.8  |
|                                   | 2005-2009           | 13.1       | 11.4 - 14.8 | 23.6    | 22.1 - 25.1 | 64.2   | 63.3 - 65.2 | 63.0   | 61.9 - 64.2 | 13.0   | 11.4 - 14.6 | 7.9      | 6.9 - 8.9  |
|                                   | 2010-2014           | 14.8       | 12.8 - 16.7 | 24.8    | 23.3 - 26.3 | 64.9   | 64.0 - 65.8 | 64.7   | 63.5 - 65.8 | 16.6   | 14.9 - 18.3 | 9.7      | 8.7 - 10.8 |
| Switzerland (10 registries)       | 2000-2004           | 16.1       | 13.6 - 18.6 | 29.2    | 26.9 - 31.4 | 62.8   | 61.3 - 64.3 | 59.5   | 57.2 - 61.8 | 12.2   | 10.3 - 14.0 | 5.6      | 4.4 - 6.9  |
|                                   | 2005-2009           | 20.6       | 17.9 - 23.2 | 31.4    | 29.0 - 33.7 | 65.1   | 63.7 - 66.6 | 65.6   | 63.5 - 67.7 | 13.4   | 11.6 - 15.3 | 7.0      | 5.8 - 8.2  |
|                                   | 2010-2014           | 23.9       | 21.0 - 26.9 | 32.2    | 29.9 - 34.5 | 67.3   | 65.7 - 68.9 | 67.3   | 65.0 - 69.6 | 15.4   | 13.5 - 17   |          |            |

**Web-table 4.1: Age-standardised five-year net survival (NS, %): adults (15-99 years) diagnosed with cancer of the oesophagus, stomach, colon, rectum, liver or pancreas, by continent, country, registry and calendar period of diagnosis (2000-2004, 2005-2009, 2010-2014)**

|                                    | Period of diagnosis | Oesophagus |             | Stomach |             | Colon  |             | Rectum |             | Liver  |             | Pancreas |             |
|------------------------------------|---------------------|------------|-------------|---------|-------------|--------|-------------|--------|-------------|--------|-------------|----------|-------------|
|                                    |                     | NS (%)     | 95% CI      | NS (%)  | 95% CI      | NS (%) | 95% CI      | NS (%) | 95% CI      | NS (%) | 95% CI      | NS (%)   | 95% CI      |
| St Gallen-Appenzell                | 2000-2004           | 15.0       | 9.7 - 20.3  | 30.0    | 24.3 - 35.8 | 58.9   | 55.1 - 62.7 | 56.8   | 51.4 - 62.1 | 13.2   | 7.9 - 18.5  | 4.9      | 2.7 - 7.2   |
|                                    | 2005-2009           | 21.3       | 15.0 - 27.5 | 30.3    | 24.5 - 36.1 | 66.2   | 62.6 - 69.8 | 64.0   | 58.6 - 69.5 | 7.8    | 4.1 - 11.6  | 7.7      | 4.8 - 10.6  |
|                                    | 2010-2014           | 22.0       | 15.9 - 28.1 | 34.2    | 28.1 - 40.3 | 69.1   | 65.6 - 72.6 | 66.3   | 61.3 - 71.4 | 8.6    | 4.4 - 12.9  | 8.4      | 5.3 - 11.4  |
| Ticino                             | 2000-2004           | 16.0       | 9.8 - 22.2  | 30.0    | 24.1 - 35.9 | 66.6   | 62.1 - 71.2 | 65.1   | 59.0 - 71.2 | 16.9   | 12.2 - 21.6 | 5.3      | 2.8 - 7.8   |
|                                    | 2005-2009           | 15.3       | 8.5 - 22.1  | 39.7    | 33.9 - 45.6 | 67.0   | 62.9 - 71.1 | 64.3   | 58.5 - 70.1 | 18.1   | 13.9 - 22.3 | 5.1      | 2.6 - 7.6   |
|                                    | 2010-2014           | 23.7       | 16.4 - 31.1 | 41.3    | 35.0 - 47.6 | 69.8   | 65.7 - 73.9 | 65.6   | 59.9 - 71.3 | 23.3   | 18.4 - 28.1 | 7.8      | 4.3 - 11.2  |
| Valais                             | 2000-2004           | 15.3       | 8.8 - 21.8  | 35.9    | 28.4 - 43.4 | 60.9   | 55.5 - 66.2 | 55.9   | 47.6 - 64.2 | 14.1   | 9.1 - 19.2  | 6.4      | 3.2 - 9.5   |
|                                    | 2005-2009           | 20.7       | 13.2 - 28.1 | 24.5    | 17.5 - 31.4 | 56.7   | 52.0 - 61.5 | 72.0   | 64.2 - 79.8 | 6.2    | 3.3 - 9.1   | 5.4      | 2.4 - 8.4   |
|                                    | 2010-2014           | 21.3       | 13.4 - 29.1 | 26.8    | 19.5 - 34.1 | 62.8   | 57.8 - 67.7 | 70.6   | 62.9 - 78.3 | 10.4   | 6.2 - 14.7  | 7.8      | 4.2 - 11.5  |
| Zürich and Zug                     | 2000-2004           | 16.2       | 12.3 - 20.1 | 23.9    | 20.2 - 27.6 | 61.7   | 59.4 - 64.1 | 56.6   | 52.8 - 60.5 | 9.1    | 6.1 - 12.2  | 5.1      | 3.1 - 7.1   |
|                                    | 2005-2009           | 21.6       | 17.5 - 25.7 | 27.2    | 23.4 - 30.9 | 65.5   | 63.3 - 67.8 | 65.0   | 61.5 - 68.5 | 14.2   | 10.9 - 17.5 | 6.4      | 4.5 - 8.2   |
|                                    | 2010-2014           | 29.2       | 23.8 - 34.5 | 30.5    | 26.2 - 34.9 | 64.8 § | 62.2 - 67.3 | 64.1 § | 60.3 - 67.9 | 12.0   | 8.9 - 15.2  | 6.6      | 4.5 - 8.8   |
| Switzerland (Childhood) †          | 2000-2004           | -          | -           | -       | -           | -      | -           | -      | -           | -      | -           | -        | -           |
|                                    | 2005-2009           | -          | -           | -       | -           | -      | -           | -      | -           | -      | -           | -        | -           |
|                                    | 2010-2014           | -          | -           | -       | -           | -      | -           | -      | -           | -      | -           | -        | -           |
| United Kingdom *<br>(4 registries) | 2000-2004           | 11.5       | 11.1 - 11.9 | 16.2    | 15.7 - 16.6 | 52.0   | 51.6 - 52.3 | 54.6   | 54.0 - 55.1 | 7.1    | 6.6 - 7.7   | 3.7      | 3.4 - 4.0   |
|                                    | 2005-2009           | 14.0       | 13.5 - 14.4 | 19.2    | 18.7 - 19.7 | 56.5   | 56.2 - 56.9 | 58.7   | 58.2 - 59.2 | 9.7    | 9.1 - 10.2  | 5.2      | 4.9 - 5.5   |
|                                    | 2010-2014           | 15.7       | 15.3 - 16.1 | 20.7    | 20.1 - 21.2 | 60.0   | 59.7 - 60.4 | 62.5   | 62.0 - 63.0 | 13.0   | 12.4 - 13.6 | 6.8      | 6.5 - 7.2   |
| England                            | 2000-2004           | 11.6       | 11.1 - 12.0 | 16.2    | 15.7 - 16.7 | 51.7   | 51.3 - 52.1 | 54.7   | 54.1 - 55.3 | 7.0    | 6.4 - 7.6   | 3.7      | 3.4 - 4.0   |
|                                    | 2005-2009           | 14.2       | 13.7 - 14.6 | 19.5    | 18.9 - 20.0 | 56.7   | 56.3 - 57.1 | 58.7   | 58.2 - 59.3 | 9.5    | 8.9 - 10.0  | 5.4      | 5.0 - 5.7   |
|                                    | 2010-2014           | 16.0       | 15.5 - 16.5 | 21.0    | 20.4 - 21.5 | 60.2   | 59.8 - 60.5 | 62.7   | 62.1 - 63.2 | 12.5   | 11.8 - 13.1 | 7.0      | 6.6 - 7.4   |
| Northern Ireland                   | 2000-2004           | 12.4       | 9.7 - 15.0  | 17.0    | 14.5 - 19.4 | 53.5   | 51.3 - 55.7 | 52.3   | 49.0 - 55.5 | 5.5    | 2.3 - 8.6   | 2.6      | 1.3 - 4.0   |
|                                    | 2005-2009           | 17.4       | 14.6 - 20.1 | 19.8    | 16.9 - 22.6 | 56.1   | 54.2 - 58.1 | 56.1   | 53.2 - 59.0 | 6.6    | 3.9 - 9.3   | 5.9      | 4.0 - 7.8   |
|                                    | 2010-2014           | 20.5       | 17.4 - 23.6 | 21.2    | 18.4 - 24.1 | 61.4   | 59.5 - 63.3 | 59.9   | 57.0 - 62.7 | 11.6   | 7.9 - 15.2  | 6.2      | 4.2 - 8.2   |
| Scotland                           | 2000-2004           | 10.3       | 9.1 - 11.5  | 16.1    | 14.7 - 17.5 | 54.6   | 53.5 - 55.8 | 56.4   | 54.6 - 58.2 | 7.5    | 5.8 - 9.1   | 3.5      | 2.6 - 4.4   |
|                                    | 2005-2009           | 12.5       | 11.2 - 13.8 | 17.7    | 16.2 - 19.2 | 58.0   | 56.9 - 59.1 | 60.2   | 58.6 - 61.8 | 12.0   | 10.3 - 13.8 | 4.1      | 3.2 - 4.9   |
|                                    | 2010-2014           | 13.4       | 12.1 - 14.7 | 19.7    | 18.0 - 21.3 | 60.9   | 59.8 - 61.9 | 63.8   | 62.2 - 65.5 | 17.6   | 15.6 - 19.7 | 5.6      | 4.5 - 6.7   |
| Wales                              | 2000-2004           | 12.5       | 10.7 - 14.2 | 16.3    | 14.5 - 18.1 | 49.5   | 48.0 - 51.0 | 50.8   | 48.6 - 52.9 | 9.1    | 6.6 - 11.5  | 4.8      | 3.6 - 6.1   |
|                                    | 2005-2009           | 12.3       | 10.6 - 13.9 | 18.2    | 16.2 - 20.3 | 51.4   | 50.0 - 52.8 | 56.7   | 54.7 - 58.7 | 9.0    | 6.8 - 11.2  | 4.5      | 3.4 - 5.7   |
|                                    | 2010-2014           | 14.3       | 12.4 - 16.1 | 18.3    | 16.2 - 20.3 | 56.0   | 54.6 - 57.3 | 59.2   | 57.3 - 61.1 | 13.0   | 10.4 - 15.5 | 5.7      | 4.4 - 7.0   |
| <b>OCEANIA</b>                     |                     |            |             |         |             |        |             |        |             |        |             |          |             |
| Australia *<br>(8 registries)      | 2000-2004           | 18.0       | 16.9 - 19.2 | 27.7    | 26.7 - 28.8 | 63.7   | 63.2 - 64.3 | 64.4   | 63.5 - 65.2 | 14.2   | 13.1 - 15.3 | 7.3      | 6.7 - 8.0   |
|                                    | 2005-2009           | 19.9       | 18.7 - 21.0 | 29.8    | 28.8 - 30.9 | 68.1   | 67.6 - 68.6 | 68.6   | 67.8 - 69.5 | 17.7   | 16.6 - 18.7 | 9.1      | 8.5 - 9.8   |
|                                    | 2010-2014           | 23.7       | 22.4 - 25.0 | 31.8    | 30.7 - 32.9 | 70.7   | 70.1 - 71.2 | 71.0   | 70.2 - 71.9 | 19.2   | 18.1 - 20.3 | 12.0     | 11.2 - 12.8 |
| Australian Capital Territory       | 2000-2004           | 25.5       | 13.8 - 37.2 | 24.2    | 16.5 - 31.9 | 65.4   | 60.7 - 70.0 | 68.2   | 60.7 - 75.6 | 12.6   | 3.6 - 21.6  | 10.8     | 4.8 - 16.7  |
|                                    | 2005-2009           | 13.7       | 4.4 - 22.9  | 29.9    | 21.6 - 38.1 | 68.6   | 64.5 - 72.8 | 67.3   | 60.3 - 74.3 | 9.8    | 4.9 - 14.7  | 7.7      | 3.3 - 12.1  |
|                                    | 2010-2014           | 20.0       | 10.5 - 29.5 | 29.5    | 19.8 - 39.2 | 68.8   | 64.4 - 73.3 | 65.9   | 57.9 - 73.8 | 19.7   | 10.1 - 29.3 | 25.8     | 17.5 - 34.2 |
| New South Wales                    | 2000-2004           | 18.1       | 16.1 - 20.2 | 29.5    | 27.7 - 31.3 | 65.0   | 64.1 - 66.0 | 64.1   | 62.6 - 65.6 | 15.3   | 13.4 - 17.2 | 7.6      | 6.4 - 8.7   |
|                                    | 2005-2009           | 18.9       | 16.9 - 20.9 | 30.7    | 28.9 - 32.6 | 69.5   | 68.6 - 70.4 | 68.6   | 67.2 - 70.1 | 20.2   | 18.4 - 22.1 | 9.9      | 8.7 - 11.1  |
|                                    | 2010-2014           | 19.9       | 17.4 - 22.4 | 32.9    | 30.6 - 35.3 | 72.4   | 71.3 - 73.5 | 70.3   | 68.6 - 72.1 | 21.7   | 19.4 - 24.0 | 12.3     | 10.7 - 13.9 |
| Northern Territory                 | 2000-2004           | 10.5       | 1.2 - 19.8  | 16.0    | 3.3 - 28.7  | 56.5   | 46.2 - 66.8 | 58.1   | 46.5 - 69.8 | 18.6   | 4.9 - 32.3  | 10.9     | 1.4 - 20.4  |
|                                    | 2005-2009           | 10.5       | 2.1 - 19.0  | 13.2    | 2.9 - 23.6  | 54.7   | 46.8 - 62.5 | 49.0   | 39.5 - 58.4 | 17.2   | 6.7 - 27.7  | 2.4      | 0.0 - 6.2   |
|                                    | 2010-2014           | 11.8       | 1.9 - 21.7  | 14.8    | 3.7 - 25.9  | 65.6   | 57.7 - 73.5 | 58.3   | 48.9 - 67.7 | 19.2   | 10.5 - 27.9 | 9.1      | 0.0 - 19.9  |
| Queensland                         | 2000-2004           | 19.2       | 16.7 - 21.8 | 30.3    | 27.9 - 32.7 | 64.6   | 63.4 - 65.8 | 67.1   | 65.1 - 69.1 | 13.9   | 11.3 - 16.5 | 6.8      | 5.3 - 8.2   |
|                                    | 2005-2009           | 22.7       | 20.1 - 25.3 | 30.2    | 27.8 - 32.6 | 68.2   | 67.1 - 69.3 | 67.4   | 65.5 - 69.2 | 17.7   | 15.3 - 20.2 | 9.0      | 7.6 - 10.4  |
|                                    | 2010-2014           | 27.6       | 24.8 - 30.4 | 30.2    | 27.8 - 32.6 | 70.0   | 69.0 - 71.1 | 69.8   | 68.0 - 71.6 | 16.4   | 14.3 - 18.5 | 11.3     | 9.8 - 12.8  |
| South Australia                    | 2000-2004           | 19.0       | 15.1 - 22.9 | 23.0    | 19.9 - 26.2 | 63.9   | 62.1 - 65.7 | 63.9   | 60.9 - 66.9 | 13.9   | 9.8 - 17.9  | 6.0      | 4.1 - 7.9   |
|                                    | 2005-2009           | 18.8       | 15.0 - 22.5 | 27.4    | 23.8 - 31.0 | 68.9   | 67.2 - 70.7 | 67.3   | 64.4 - 70.2 | 16.9   | 13.4 - 20.5 | 8.5      | 6.3 - 10.7  |
|                                    | 2010-2014           | 26.2       | 21.4 - 31.0 | 27.2    | 23.3 - 31.1 | 69.4   | 67.5 - 71.3 | 69.2   | 66.0 - 72.3 | 16.8   | 13.1 - 20.4 | 10.6     | 8.0 - 13.2  |
| Tasmania                           | 2000-2004           | 13.0       | 8.2 - 17.9  | 14.8    | 10.2 - 19.3 | 56.4   | 53.0 - 59.7 | 57.2   | 52.0 - 62.5 | 8.7    | 4.2 - 13.1  | 8.9      | 5.3 - 12.5  |
|                                    | 2005-2009           | 19.1       | 13.6 - 24.6 | 26.8    | 21.1 - 32.5 | 65.2   | 62.3 - 68.1 | 68.0   | 63.1 - 72.9 | 10.7   | 4.3 - 17.1  | 7.9      | 4.7 - 11.0  |
|                                    | 2010-2014           | 20.7       | 14.6 - 26.8 | 22.7    | 16.5 - 29.0 | 71.1   | 68.0 - 74.3 | 71.2   | 66.0 - 76.4 | 3.4    | 0.3 - 6.5   | 7.8      | 4.4 - 11.2  |
| Victoria                           | 2000-2004           | 18.6       | 16.2 - 20.9 | 27.6    | 25.7 - 29.5 | 61.4   | 60.3 - 62.5 | 64.2   | 62.6 - 65.8 | 14.7   | 12.5 - 16.9 | 7.6      | 6.4 - 8.9   |
|                                    | 2005-2009           | 20.1       | 17.8 - 22.4 | 29.1    | 27.1 - 31.1 | 66.1   | 65.0 - 67.1 | 69.5   | 68.0 - 71.1 | 15.8   | 13.8 - 17.7 | 8.4      | 7.1 - 9.6   |
|                                    | 2010-2014           | 23.4       | 20.9 - 25.8 | 32.8    | 30.7 - 34.8 | 69.1   | 68.1 - 70.2 | 72.6   | 71.0 - 74.1 | 20.0   | 17.9 - 22.1 | 11.5     | 10.0 - 12.9 |
| Western Australia                  | 2000-2004           | 14.6       | 11.4 - 17.8 | 25.1    | 21.7 - 28.5 | 65.5   | 63.7 - 67.3 | 62.9   | 60.0 - 65.8 | 10.4   | 7.1 - 13.7  | 6.6      | 4.8 - 8.4   |
|                                    | 2005-2009           | 18.2       | 14.9 - 21.4 | 31.4    | 27.9 - 34.8 | 69.1   | 67.4 - 70.8 | 70.0   | 67.3 - 72.7 | 17.7   | 14.2 - 21.3 | 9.5      | 7.6 - 11.4  |
|                                    | 2010-2014           | 23.0       | 19.5 - 26.5 | 35.1    | 31.6 - 38.6 | 72.9   | 71.3 - 74.5 | 72.3   | 69.7 - 74.9 | 21.4   | 17.9 - 24.9 | 14.9     | 12.5 - 17.3 |
| New Zealand *                      | 2000-2004           | 11.5       | 9.4 - 13.6  | 24.6    | 22.4 - 26.8 | 61.4   | 60.2 - 62.7 | 60.1   | 58.0 - 62.1 | 12.4   | 9.9 - 15.0  | 7.0      | 5.5 - 8.5   |
|                                    | 2005-2009           | 14.5       | 12.1 - 16.8 | 24.8    | 22.5 - 27.0 | 62.8   | 61.6 - 64.0 | 63.3   | 61.4 - 65.3 | 16.8   | 14.4 - 19.1 | 7.7      | 6.3 - 9.0   |
|                                    | 2010-2014           | 15.3       | 13.0 - 17.7 | 25.7    | 23.5 - 27.9 | 64.0   | 62.8 - 65.1 | 66.0   | 64.1 - 67.9 | 19.0   | 16.7 - 21.4 | 8.1      | 6.7 - 9.6   |

**Web-table 4.2: Age-standardised five-year net survival (NS, %): adults (15-99 years) diagnosed with cancer of the lung, melanoma of the skin, cancer of the breast, ovary, cervix or prostate, by continent, country, registry and calendar period of diagnosis (2000-2004, 2005-2009, 2010-2014)**

|                             | Period of diagnosis | Lung   |             | Melanoma of the skin |               | Breast |              | Cervix  |               | Ovary  |              | Prostate |               |
|-----------------------------|---------------------|--------|-------------|----------------------|---------------|--------|--------------|---------|---------------|--------|--------------|----------|---------------|
|                             |                     | NS (%) | 95% CI      | NS (%)               | 95% CI        | NS (%) | 95% CI       | NS (%)  | 95% CI        | NS (%) | 95% CI       | NS (%)   | 95% CI        |
| AFRICA                      |                     |        |             |                      |               |        |              |         |               |        |              |          |               |
| Algeria<br>(3 registries)   | 2000-2004           | 18.0 § | 14.0 - 22.0 | 6.9 §                | 0.0 - 18.5    | 38.9 § | 29.1 - 48.7  | 61.1 §  | 55.5 - 66.7   | 50.7 § | 35.6 - 65.8  | 89.9 §   | 77.8 - 100.0  |
|                             | 2005-2009           | 30.2 § | 25.7 - 34.8 | 63.4 §               | 59.4 - 67.3   | 55.6 § | 47.4 - 63.8  | 70.7 §  | 64.5 - 77.0   | 54.3 § | 44.7 - 63.8  | 50.3 §   | 41.0 - 59.6   |
|                             | 2010-2014           | 33.7 § | 28.5 - 38.9 | 54.9 §               | 47.3 - 62.6   | 77.0 § | 68.5 - 85.6  | 72.4 §  | 66.0 - 78.7   | 66.5 § | 53.5 - 79.5  | 64.1 §   | 56.6 - 71.6   |
| Annaba                      | 2000-2004           | 61.7 § | 28.7 - 94.7 | 81.1 §               | 49.3 - 100.0  | 68.4 § | 49.5 - 87.2  | 57.3 §  | 18.2 - 96.3   | 70.3 § | 25.3 - 100.0 | 100.0 §  | 100.0 - 100.0 |
|                             | 2005-2009           | 28.5 § | 11.2 - 45.7 | 78.6 §               | 40.1 - 100.0  | 84.3 § | 71.9 - 96.6  | 72.4 §  | 38.7 - 100.0  | 93.7 § | 83.7 - 100.0 | 87.9 §   | 62.7 - 100.0  |
|                             | 2010-2014           | 25.1 § | 11.7 - 38.5 | 100.0 §              | 100.0 - 100.0 | 83.6 § | 65.9 - 100.0 | 100.0 § | 100.0 - 100.0 | 98.8 § | 92.1 - 100.0 | 100.0 §  | 89.9 - 100.0  |
| Sétif                       | 2000-2004           | 16.9 § | 13.3 - 20.6 | 1.6 §                | 0.0 - 5.4     | -      | -            | 61.7 §  | 56.1 - 67.4   | 40.4 § | 24.8 - 56.0  | 88.1 §   | 75.4 - 100.0  |
|                             | 2005-2009           | 20.6 § | 16.0 - 25.2 | 63.9 §               | 59.9 - 67.9   | -      | -            | 60.0 §  | 51.8 - 68.3   | 54.1 § | 41.0 - 67.1  | 41.0 §   | 32.5 - 49.5   |
|                             | 2010-2014           | 12.2 § | 6.7 - 17.7  | 62.2 §               | 57.5 - 66.9   | -      | -            | 42.9 §  | 25.3 - 60.5   | 61.7 § | 38.6 - 84.9  | 39.2 §   | 24.1 - 54.3   |
| Tlemcen                     | 2000-2004           | -      | -           | -                    | -             | -      | -            | -       | -             | -      | -            | -        | -             |
|                             | 2005-2009           | 51.2 § | 42.5 - 59.9 | -                    | -             | 80.0 § | 67.5 - 92.5  | 79.1 §  | 71.6 - 86.6   | 78.2 § | 67.5 - 88.8  | 79.4 §   | 62.7 - 96.2   |
|                             | 2010-2014           | 61.7 § | 51.4 - 71.9 | -                    | -             | 95.3 § | 88.1 - 100.0 | 76.6 §  | 67.6 - 85.7   | 78.3 § | 62.3 - 94.3  | 54.7 §   | 26.2 - 83.3   |
| Mali (Bamako)               | 2000-2004           | -      | -           | -                    | -             | -      | -            | -       | -             | -      | -            | -        | -             |
|                             | 2005-2009           | -      | -           | -                    | -             | -      | -            | -       | -             | -      | -            | -        | -             |
|                             | 2010-2014           | -      | -           | -                    | -             | 0.0 §  | 0.0 - 0.0    | -       | -             | -      | -            | -        | -             |
| Mauritius *                 | 2000-2004           | -      | -           | -                    | -             | -      | -            | -       | -             | -      | -            | -        | -             |
|                             | 2005-2009           | 31.7   | 25.9 - 37.6 | -                    | -             | 83.6   | 75.9 - 91.3  | 80.8    | 76.0 - 85.6   | 79.7   | 69.6 - 89.8  | 61.8     | 54.1 - 69.4   |
|                             | 2010-2014           | 20.4   | 13.2 - 27.7 | -                    | -             | -      | -            | -       | -             | -      | -            | 63.5     | 54.7 - 72.4   |
| Morocco (Casablanca)        | 2000-2004           | -      | -           | -                    | -             | -      | -            | -       | -             | -      | -            | -        | -             |
|                             | 2005-2009           | -      | -           | -                    | -             | 86.7 § | 71.7 - 100.0 | -       | -             | -      | -            | -        | -             |
|                             | 2010-2014           | -      | -           | -                    | -             | 99.7 § | 95.8 - 100.0 | -       | -             | -      | -            | -        | -             |
| Nigeria (Ibadan)            | 2000-2004           | -      | -           | -                    | -             | -      | -            | -       | -             | -      | -            | -        | -             |
|                             | 2005-2009           | -      | -           | 100.0 §              | 100.0 - 100.0 | 98.8 § | 95.6 - 100.0 | 58.6 §  | 46.5 - 70.7   | 59.4 § | 24.9 - 93.9  | 73.9 §   | 50.2 - 97.6   |
|                             | 2010-2014           | -      | -           | 97.7 §               | 74.6 - 100.0  | 97.5 § | 89.9 - 100.0 | 49.8 §  | 36.5 - 63.1   | 49.1 § | 33.8 - 64.4  | 58.7 §   | 40.1 - 77.2   |
| South Africa (Eastern Cape) | 2000-2004           | -      | -           | -                    | -             | 53.0 § | 23.4 - 82.7  | 70.7 §  | 56.7 - 84.7   | 82.5 § | 42.5 - 100.0 | 77.6 §   | 55.0 - 100.0  |
|                             | 2005-2009           | 16.7 § | 0.8 - 32.5  | -                    | -             | 32.0 § | 23.3 - 40.7  | 40.2 §  | 32.2 - 48.1   | 81.0 § | 58.8 - 100.0 | 38.6 §   | 25.1 - 52.0   |
|                             | 2010-2014           | 15.0 § | 6.1 - 24.0  | 16.7 §               | 0.0 - 41.0    | 40.1 § | 30.7 - 49.6  | 37.1 §  | 31.4 - 42.9   | 67.8 § | 47.4 - 88.2  | 37.8 §   | 25.5 - 50.1   |
| AMERICA (CENTRAL AND SOUTH) |                     |        |             |                      |               |        |              |         |               |        |              |          |               |
| Argentina<br>(5 registries) | 2000-2004           | 19.5 § | 15.5 - 23.5 | 68.4                 | 60.6 - 76.3   | 82.3   | 79.4 - 85.2  | 58.3    | 52.6 - 64.0   | 40.4   | 32.4 - 48.4  | 83.5     | 78.5 - 88.6   |
|                             | 2005-2009           | 12.4 § | 10.9 - 14.0 | 68.1                 | 63.4 - 72.9   | 82.0   | 80.4 - 83.6  | 55.6    | 52.0 - 59.1   | 43.2   | 38.6 - 47.9  | 83.6     | 81.2 - 86.0   |
|                             | 2010-2014           | 13.1 § | 11.2 - 15.1 | 71.0                 | 65.6 - 76.4   | 84.4   | 82.6 - 86.2  | 52.7    | 48.7 - 56.7   | 38.6   | 34.3 - 42.9  | 87.6     | 84.9 - 90.4   |
| Chubut                      | 2000-2004           | -      | -           | -                    | -             | -      | -            | -       | -             | -      | -            | -        | -             |
|                             | 2005-2009           | 3.2 §  | 0.0 - 6.6   | -                    | -             | 81.4   | 72.9 - 89.9  | 77.9    | 66.8 - 89.0   | 0.0 §  | 0.0 - 0.0    | 10.5 §   | 0.0 - 26.1    |
|                             | 2010-2014           | 1.5 §  | 0.0 - 3.0   | -                    | -             | 91.6 § | 85.1 - 98.1  | 66.3 §  | 56.8 - 75.9   | -      | -            | 2.7 §    | 0.0 - 6.9     |
| Córdoba                     | 2000-2004           | 18.3 § | 11.2 - 25.3 | 71.8                 | 61.0 - 82.5   | 74.1   | 69.3 - 78.9  | 55.4    | 46.2 - 64.5   | 28.3   | 17.9 - 38.7  | 81.5     | 73.4 - 89.7   |
|                             | 2005-2009           | 12.9 § | 10.7 - 15.1 | 70.9                 | 64.5 - 77.4   | 80.4   | 78.0 - 82.8  | 55.3    | 50.3 - 60.4   | 43.3   | 37.1 - 49.4  | 84.5     | 81.1 - 87.9   |
|                             | 2010-2014           | 13.0 § | 9.9 - 16.1  | 69.7                 | 60.9 - 78.5   | 83.4   | 80.4 - 86.3  | 52.5    | 45.9 - 59.0   | 45.4   | 37.1 - 53.7  | 90.6     | 86.0 - 95.3   |
| Mendoza                     | 2000-2004           | 19.2 § | 14.9 - 23.6 | 63.7                 | 54.2 - 73.3   | 85.1   | 81.7 - 88.6  | 56.6    | 49.9 - 63.4   | 48.9   | 37.7 - 60.2  | 82.7     | 76.9 - 88.6   |
|                             | 2005-2009           | 11.7 § | 9.6 - 13.8  | 65.0                 | 58.3 - 71.7   | 82.9   | 80.5 - 85.2  | 52.8    | 47.9 - 57.7   | 42.3   | 35.8 - 48.8  | 82.2     | 78.9 - 85.6   |
|                             | 2010-2014           | 11.8 § | 9.4 - 14.3  | 70.7                 | 63.7 - 77.7   | 84.1   | 81.6 - 86.7  | 50.3    | 45.1 - 55.5   | 32.6   | 27.7 - 37.4  | 85.3     | 81.6 - 89.0   |
| Tierra del Fuego            | 2000-2004           | -      | -           | -                    | -             | -      | -            | -       | -             | -      | -            | -        | -             |
|                             | 2005-2009           | 22.0 § | 11.6 - 32.4 | -                    | -             | 90.9   | 82.7 - 99.2  | -       | -             | -      | -            | 96.9     | 81.4 - 100.0  |
|                             | 2010-2014           | 15.7 § | 6.2 - 25.2  | -                    | -             | 89.4   | 76.3 - 100.0 | -       | -             | -      | -            | 85.1 §   | 65.5 - 100.0  |
| Argentina Childhood †       | 2000-2004           | -      | -           | -                    | -             | -      | -            | -       | -             | -      | -            | -        | -             |
|                             | 2005-2009           | -      | -           | -                    | -             | -      | -            | -       | -             | -      | -            | -        | -             |
|                             | 2010-2014           | -      | -           | -                    | -             | -      | -            | -       | -             | -      | -            | -        | -             |
| Brazil<br>(6 registries)    | 2000-2004           | 10.7   | 8.3 - 13.1  | 76.7                 | 71.5 - 81.8   | 68.7 § | 67.5 - 69.8  | 69.3    | 66.1 - 72.6   | 42.1   | 36.0 - 48.1  | 90.0     | 87.2 - 92.8   |
|                             | 2005-2009           | 7.8    | 5.8 - 9.8   | 75.9                 | 71.7 - 80.1   | 76.9 § | 75.7 - 78.0  | 63.2    | 59.9 - 66.5   | 34.1   | 29.4 - 38.9  | 92.5     | 90.2 - 94.8   |
|                             | 2010-2014           | 8.5    | 5.3 - 11.6  | 70.0                 | 65.4 - 74.7   | 75.2 § | 73.9 - 76.5  | 60.3    | 56.3 - 64.3   | 34.9   | 29.5 - 40.3  | 91.6     | 89.1 - 94.1   |
| Aracaju                     | 2000-2004           | 15.5   | 10.5 - 20.5 | 70.2 §               | 53.6 - 86.7   | 79.9   | 73.5 - 86.4  | 57.6    | 51.4 - 63.8   | 32.4   | 21.9 - 42.8  | 92.5     | 87.7 - 97.4   |
|                             | 2005-2009           | 15.2 § | 9.3 - 21.0  | 85.5                 | 75.8 - 95.2   | 81.8   | 76.1 - 87.4  | 56.6    | 49.3 - 64.0   | 26.4   | 19.0 - 33.7  | 99.0     | 95.6 - 100.0  |
|                             | 2010-2014           | 9.7 §  | 4.9 - 14.6  | 79.0                 | 69.2 - 88.8   | 79.8   | 72.9 - 86.7  | 50.5    | 40.9 - 60.2   | 31.2   | 20.5 - 41.8  | 97.4     | 93.0 - 100.0  |
| Cuiabá                      | 2000-2004           | -      | -           | -                    | -             | -      | -            | 85.8    | 80.6 - 90.9   | -      | -            | -        | -             |
|                             | 2005-2009           | -      | -           | -                    | -             | -      | -            | 86.7    | 80.7 - 92.7   | -      | -            | -        | -             |
|                             | 2010-2014           | -      | -           | -                    | -             | -      | -            | -       | -             | -      | -            | -        | -             |
| Curitiba                    | 2000-2004           | 19.3 § | 15.9 - 22.7 | 76.6                 | 71.2 - 82.0   | 83.5   | 80.6 - 86.5  | 65.5    | 60.9 - 70.2   | 45.3   | 38.2 - 52.3  | 86.5     | 83.2 - 89.8   |
|                             | 2005-2009           | 13.3 § | 10.9 - 15.7 | 73.2                 | 68.6 - 77.9   | 80.9   | 78.2 - 83.5  | 57.6    | 53.2 - 62.0   | 34.0   | 28.5 - 39.5  | 86.5     | 83.7 - 89.4   |
|                             | 2010-2014           | 11.0 § | 8.2 - 13.7  | 66.1                 | 60.2 - 72.1   | 79.3   | 76.0 - 82.5  | 60.0    | 54.3 - 65.7   | 32.9   | 26.3 - 39.6  | 83.3     | 80.2 - 86.5   |
| Goiânia                     | 2000-2004           | 9.5    | 6.6 - 12.4  | -                    | -             | 82.6 § | 75.9 - 89.2  | -       | -             | -      | -            | -        | -             |
|                             | 2005-2009           | 7.7    | 5.6 - 9.8   | -                    | -             | 87.1   | 82.4 - 91.8  | -       | -             | -      | -            | -        | -             |
|                             | 2010-2014           | 8.2 §  | 5.5 - 11.0  | -                    | -             | 88.1   | 82.3 - 93.8  | -       | -             | -      | -            | -        | -             |
| Jaú                         | 2000-2004           | 1.5    | 0.0 - 3.6   | 74.8                 | 55.9 - 93.7   | 82.2   | 72.2 - 92.2  | 66.0    | 49.1 - 82.9   | 48.1   | 28.6 - 67.7  | 77.9     | 69.7 - 86.1   |
|                             | 2005-2009           | 8.8    | 4.0 - 13.6  | 87.5                 | 67.4 - 100.0  | 69.8   | 59.5 - 80.1  | 47.3    | 30.4 - 64.2   | 64.1   | 44.0 - 84.2  | 85.3     | 76.5 - 94.1   |
|                             | 2010-2014           | 5.9    | 1.5 - 10.3  | 75.7                 | 60.5 - 91.0   | 71.6   | 60.2 - 82.9  | 50.0    | 36.4 - 63.7   | 57.3   | 35.7 - 78.8  | 87.0     | 77.7 - 96.4   |
| São Paulo                   | 2000-2004           | -      | -           | -                    | -             | 65.4 § | 64.1 - 66.7  | -       | -             | -      | -            | -        | -             |
|                             | 2005-2009           | -      | -           | -                    | -             | 74.9 § | 73.5 - 76.3  | -       | -             | -      | -            | -        | -             |
|                             | 2010-2014           | -      | -           | -                    | -             | 75.3 § | 73.6 - 77.0  | -       | -             | -      | -            | -        | -             |
| Chile<br>(4 registries)     | 2000-2004           | 7.1 §  | 4.4 - 9.8   | 57.4                 | 46.6 - 68.1   | 74.6   | 68.2 - 81.1  | 58.2    | 52.3 - 64.0   | 25.8   | 18.5 - 33.1  | 82.6     | 77.2 - 88.0   |
|                             | 2005-2009           | 6.3 §  | 4.7 - 7.8   | 64.4                 | 54.4 - 74.4   | 73.5   | 68.4 - 78.6  | 57.2    | 51.6 - 62.9   | 29.0   | 23.3 - 34.7  | 84.4     | 80.7 - 88.1   |
|                             | 2010-2014           | 4.6 §  | 3.0 - 6.2   | 59.7 §               | 49.4 - 69.9   | 75.5 § | 69.4 - 81.5  | 56.7 §  | 50.0 - 63.4   | 28.0 § | 21.3 - 34.7  | 82.0 §   | 78.4 - 85.5   |
| Antofagasta                 | 2000-2004           | 8.8 §  | 5.2 - 12.4  | 42.7                 | 21.1 - 64.4   | 71.3   | 56.1 - 86.6  | 45.4 §  | 28.2 - 62.6   | 31.3   | 13.1 - 49.5  | 71.9 §   | 61.3 - 82.6   |
|                             | 2005-2009           | 5.8 §  | 4.0 - 7.7   | 50.2 §               | 37.8 - 62.7   | 76.6 § | 70.0 - 83.3  | 45.0 §  | 37.3 - 52.7   | 32.2 § | 19.9 - 44.6  | 65.8 §   | 59.0 - 72.6   |
|                             | 2010-2014           | 4.1 §  | 1.5 - 6.6   | 40.2 §               | 25.6 - 54.8   | 75.3 § | 58.8 - 91.8  | 58.6 §  | 47.8 - 69.4   | 5.9 §  | 4.0 - 7.8    | 75.4 §   | 62.8 - 88     |

**Web-table 4.2: Age-standardised five-year net survival (NS, %): adults (15-99 years) diagnosed with cancer of the lung, melanoma of the skin, cancer of the breast, ovary, cervix or prostate, by continent, country, registry and calendar period of diagnosis (2000-2004, 2005-2009, 2010-2014)**

|                            | Period of diagnosis | Lung   |             | Melanoma of the skin |              | Breast |             | Cervix |             | Ovary  |             | Prostate |              |
|----------------------------|---------------------|--------|-------------|----------------------|--------------|--------|-------------|--------|-------------|--------|-------------|----------|--------------|
|                            |                     | NS (%) | 95% CI      | NS (%)               | 95% CI       | NS (%) | 95% CI      | NS (%) | 95% CI      | NS (%) | 95% CI      | NS (%)   | 95% CI       |
| Colombia<br>(4 registries) | 2000-2004           | 9.4    | 7.2 - 11.5  | 63.1 §               | 57.0 - 69.1  | 72.3   | 68.9 - 75.7 | 56.6 § | 53.5 - 59.8 | 33.5   | 28.0 - 39.0 | 83.6     | 80.7 - 86.5  |
|                            | 2005-2009           | 10.5   | 8.5 - 12.5  | 71.3 §               | 66.2 - 76.5  | 79.1   | 76.1 - 82.0 | 55.4   | 52.6 - 58.1 | 35.4   | 30.3 - 40.6 | 87.8     | 85.4 - 90.3  |
|                            | 2010-2014           | 8.7 §  | 6.7 - 10.6  | 65.1 §               | 59.2 - 71.1  | 72.1 § | 69.0 - 75.2 | 49.4 § | 46.5 - 52.3 | 33.3 § | 28.2 - 38.4 | 80.3 §   | 77.6 - 83.1  |
| Bucaramanga                | 2000-2004           | -      | -           | 77.6 §               | 61.2 - 94.0  | -      | -           | 64.5 § | 56.9 - 72.1 | -      | -           | -        | -            |
|                            | 2005-2009           | -      | -           | 73.0 §               | 63.8 - 82.2  | -      | -           | 53.4   | 48.2 - 58.6 | -      | -           | -        | -            |
|                            | 2010-2014           | -      | -           | 68.1 §               | 57.7 - 78.5  | -      | -           | 55.2 § | 49.4 - 61.0 | -      | -           | -        | -            |
| Cali                       | 2000-2004           | 9.4    | 7.2 - 11.5  | 61.1 §               | 54.7 - 67.5  | 71.6   | 68.2 - 75.1 | 56.1 § | 52.3 - 59.9 | 32.8   | 27.2 - 38.3 | 84.3     | 81.3 - 87.3  |
|                            | 2005-2009           | 10.5   | 8.5 - 12.5  | 68.5 §               | 61.8 - 75.1  | 79.8   | 76.7 - 83.0 | 56.4   | 52.8 - 60.0 | 35.1   | 29.7 - 40.5 | 87.8     | 85.4 - 90.3  |
|                            | 2010-2014           | 8.7 §  | 6.7 - 10.6  | 62.9 §               | 54.4 - 71.3  | 71.1 § | 67.9 - 74.3 | 46.0 § | 42.1 - 49.8 | 32.8 § | 27.5 - 38.2 | 80.3 §   | 77.6 - 83.1  |
| Manizales                  | 2000-2004           | 31.1 § | 18.0 - 44.2 | 77.5 §               | 50.8 - 100.0 | 79.9 § | 65.3 - 94.4 | 74.7 § | 62.8 - 86.7 | 42.7 § | 21.4 - 64.1 | 47.3 §   | 30.8 - 63.9  |
|                            | 2005-2009           | 15.6 § | 10.0 - 21.2 | 41.1 §               | 18.4 - 63.8  | 83.7 § | 75.6 - 91.8 | 45.3 § | 36.5 - 54.1 | 31.6 § | 17.4 - 45.8 | 94.5 §   | 86.0 - 100.0 |
|                            | 2010-2014           | 31.2 § | 21.1 - 41.2 | 73.7 §               | 41.6 - 100.0 | 83.1 § | 73.9 - 92.3 | 52.0 § | 40.0 - 64.0 | 66.9 § | 48.3 - 85.4 | 96.7 §   | 89.2 - 100.0 |
| Pasto                      | 2000-2004           | 9.8 §  | 1.4 - 18.2  | 60.4 §               | 42.6 - 78.3  | 77.0   | 64.7 - 89.3 | 53.0 § | 46.2 - 59.9 | 50.8   | 36.5 - 65.1 | 71.7     | 60.5 - 82.9  |
|                            | 2005-2009           | 8.9 §  | 3.2 - 14.7  | 75.3 §               | 63.5 - 87.0  | 71.3   | 62.5 - 80.0 | 55.8   | 49.1 - 62.4 | 44.8   | 32.7 - 57.0 | 73.8 §   | 64.7 - 82.9  |
|                            | 2010-2014           | 6.6 §  | 2.1 - 11.2  | 68.8 §               | 53.9 - 83.7  | 82.4 § | 70.8 - 93.9 | 50.5 § | 42.5 - 58.6 | 30.9 § | 19.1 - 42.8 | 72.7 §   | 60.8 - 84.6  |
| Costa Rica *               | 2000-2004           | 36.2 § | 31.0 - 41.5 | 82.6                 | 77.2 - 88.1  | 87.0   | 83.6 - 90.3 | 84.9 § | 81.2 - 88.6 | 54.3   | 43.7 - 64.9 | 94.0     | 92.0 - 96.1  |
|                            | 2005-2009           | 22.0 § | 19.0 - 25.1 | 76.2                 | 71.5 - 80.8  | 86.4   | 84.0 - 88.7 | 78.3 § | 75.3 - 81.3 | 47.1   | 40.5 - 53.7 | 92.6     | 90.9 - 94.2  |
|                            | 2010-2014           | 20.1 § | 17.1 - 23.1 | 77.2                 | 72.7 - 81.7  | 86.7   | 84.6 - 88.9 | 78.0 § | 74.8 - 81.2 | 56.9   | 49.1 - 64.7 | 93.2     | 91.5 - 94.9  |
| Cuba *                     | 2000-2004           | 4.5 §  | 3.8 - 5.1   | -                    | -            | 73.7   | 72.2 - 75.1 | 64.1   | 62.3 - 65.9 | 29.5   | 26.7 - 32.3 | 26.1 §   | 24.6 - 27.6  |
|                            | 2005-2009           | 23.2 § | 22.1 - 24.2 | -                    | -            | 81.8   | 80.5 - 83.0 | 68.8   | 67.0 - 70.7 | 38.4   | 35.6 - 41.3 | 53.8 §   | 52.1 - 55.6  |
|                            | 2010-2014           | 30.1 § | 28.4 - 31.8 | -                    | -            | 75.1   | 73.7 - 76.5 | 72.9   | 70.5 - 75.2 | 49.3 § | 45.0 - 53.5 | 71.4 §   | 68.9 - 74.0  |
| Ecuador<br>(5 registries)  | 2000-2004           | 10.1 § | 7.2 - 13.0  | 59.0                 | 50.9 - 67.1  | 72.1   | 67.3 - 76.9 | 47.4   | 44.1 - 50.7 | 34.5   | 26.5 - 42.5 | 85.7     | 82.0 - 89.5  |
|                            | 2005-2009           | 10.5 § | 8.5 - 12.4  | 60.5                 | 54.5 - 66.5  | 75.7   | 72.7 - 78.7 | 50.4   | 47.8 - 52.9 | 38.8   | 33.1 - 44.5 | 80.7     | 78.0 - 83.5  |
|                            | 2010-2014           | 12.2 § | 10.0 - 14.4 | 57.9                 | 51.6 - 64.1  | 75.5   | 72.4 - 78.7 | 52.0   | 49.3 - 54.7 | 37.9   | 32.1 - 43.7 | 82.2     | 79.4 - 85.0  |
| Cuenca                     | 2000-2004           | 3.9 §  | 0.0 - 10.0  | -                    | -            | 42.7 § | 30.3 - 55.1 | 14.2 § | 6.0 - 22.4  | 0.0 §  | 0.0 - 0.1   | 57.2 §   | 45.9 - 68.5  |
|                            | 2005-2009           | 2.0 §  | 0.0 - 5.2   | 0.1 §                | 0.0 - 0.3    | 32.7 § | 18.4 - 47.0 | 8.0 §  | 0.6 - 15.3  | 3.2 §  | 0.0 - 8.2   | 22.9 §   | 14.6 - 31.1  |
|                            | 2010-2014           | 2.3 §  | 0.0 - 6.4   | 0.3 §                | 0.0 - 1.1    | 39.7 § | 19.2 - 60.2 | 10.5 § | 3.4 - 17.6  | 6.8 §  | 0.0 - 16.2  | 50.9 §   | 39.2 - 62.6  |
| Guayaquil                  | 2000-2004           | -      | -           | -                    | -            | -      | -           | -      | -           | -      | -           | -        | -            |
|                            | 2005-2009           | 7.1 §  | 4.7 - 9.5   | 48.6                 | 38.1 - 59.1  | 71.5   | 67.2 - 75.9 | 49.0   | 45.5 - 52.6 | 37.3   | 28.4 - 46.2 | 66.7     | 62.5 - 70.9  |
|                            | 2010-2014           | 8.9 §  | 6.2 - 11.7  | 48.0                 | 36.9 - 59.2  | 68.7   | 64.3 - 73.0 | 47.9   | 44.2 - 51.7 | 35.7   | 27.1 - 44.4 | 67.0     | 62.5 - 71.4  |
| Loja                       | 2000-2004           | 0.3 §  | 0.0 - 1.0   | 40.7                 | 18.1 - 63.4  | 57.0   | 43.5 - 70.6 | 40.0   | 31.6 - 48.4 | 42.5   | 23.0 - 62.0 | 67.5     | 56.7 - 78.3  |
|                            | 2005-2009           | 20.2 § | 8.6 - 31.8  | 49.1                 | 28.8 - 69.4  | 71.1   | 59.9 - 82.2 | 50.0   | 40.7 - 59.3 | 42.7   | 25.9 - 59.5 | 76.1     | 68.1 - 84.0  |
|                            | 2010-2014           | 22.7 § | 8.4 - 37.0  | 51.3                 | 29.4 - 73.2  | 67.4   | 54.9 - 80.0 | 63.2   | 52.7 - 73.7 | 64.4   | 44.9 - 83.8 | 85.4     | 76.4 - 94.4  |
| Manabí                     | 2000-2004           | 8.7 §  | 3.9 - 13.6  | 13.8                 | 0.0 - 35.7   | 68.7   | 58.3 - 79.2 | 46.1   | 40.4 - 51.7 | 56.8 § | 43.9 - 69.8 | 54.5 §   | 46.2 - 62.8  |
|                            | 2005-2009           | 5.1 §  | 2.0 - 8.3   | 49.7                 | 27.5 - 72.0  | 67.3   | 59.7 - 74.9 | 42.3   | 36.7 - 47.9 | 27.3   | 17.7 - 36.8 | 58.2 §   | 52.4 - 64.1  |
|                            | 2010-2014           | 10.8 § | 6.0 - 15.7  | 53.0                 | 31.5 - 74.5  | 72.6   | 64.8 - 80.5 | 47.9   | 42.0 - 53.9 | 30.8   | 21.5 - 40.1 | 54.0 §   | 46.5 - 61.4  |
| Quito                      | 2000-2004           | 12.7 § | 8.7 - 16.7  | 62.7                 | 53.9 - 71.5  | 73.9   | 68.3 - 79.5 | 49.6   | 45.1 - 54.1 | 35.6   | 27.3 - 44.0 | 86.8     | 83.0 - 90.6  |
|                            | 2005-2009           | 15.6 § | 11.8 - 19.4 | 66.8                 | 59.0 - 74.6  | 83.1   | 78.0 - 88.2 | 56.6   | 51.6 - 61.6 | 41.3   | 32.9 - 49.7 | 92.5     | 88.8 - 96.2  |
|                            | 2010-2014           | 17.0 § | 12.8 - 21.2 | 61.8                 | 53.5 - 70.1  | 84.2   | 78.8 - 89.5 | 57.8   | 52.7 - 62.9 | 37.9   | 29.6 - 46.3 | 93.1     | 89.2 - 97.0  |
| Guadeloupe *               | 2000-2004           | -      | -           | -                    | -            | -      | -           | -      | -           | -      | -           | -        | -            |
|                            | 2005-2009           | 6.8    | 2.3 - 11.2  | 86.2 §               | 53.0 - 100.0 | 69.8 § | 60.0 - 79.7 | 20.9 § | 3.3 - 38.5  | 24.2 § | 8.9 - 39.5  | 82.8 §   | 78.2 - 87.5  |
|                            | 2010-2014           | 4.0 §  | 0.2 - 7.7   | 14.1 §               | 0.0 - 36.7   | 50.2 § | 39.6 - 60.8 | 19.4 § | 9.0 - 29.9  | 29.5 § | 13.8 - 45.2 | 71.4 §   | 65.5 - 77.2  |
| Martinique *               | 2000-2004           | 12.5   | 7.6 - 17.4  | 81.8 §               | 68.5 - 95.1  | 78.9   | 73.5 - 84.3 | 69.7   | 62.5 - 76.9 | 29.5   | 17.8 - 41.1 | 93.2     | 90.5 - 95.8  |
|                            | 2005-2009           | 14.7   | 10.4 - 18.9 | 86.4 §               | 74.7 - 98.2  | 87.8   | 83.5 - 92.1 | 57.6   | 48.9 - 66.3 | 34.0   | 24.6 - 43.4 | 97.8     | 95.7 - 99.9  |
|                            | 2010-2014           | 11.8   | 6.4 - 17.2  | 77.8 §               | 61.3 - 94.3  | 89.8   | 84.5 - 95.1 | 57.5   | 46.2 - 68.8 | 35.7 § | 23.4 - 48.0 | 97.9     | 95.1 - 100.0 |
| Mexico (Childhood) †       | 2000-2004           | -      | -           | -                    | -            | -      | -           | -      | -           | -      | -           | -        | -            |
|                            | 2005-2009           | -      | -           | -                    | -            | -      | -           | -      | -           | -      | -           | -        | -            |
|                            | 2010-2014           | -      | -           | -                    | -            | -      | -           | -      | -           | -      | -           | -        | -            |
| Peru (Lima)                | 2000-2004           | -      | -           | -                    | -            | -      | -           | -      | -           | -      | -           | -        | -            |
|                            | 2005-2009           | -      | -           | -                    | -            | -      | -           | -      | -           | -      | -           | -        | -            |
|                            | 2010-2014           | -      | -           | -                    | -            | 84.0   | 81.4 - 86.7 | 57.2   | 54.8 - 59.6 | -      | -           | -        | -            |
| Puerto Rico *              | 2000-2004           | 14.7 § | 13.1 - 16.3 | 73.3                 | 68.2 - 78.4  | 83.4   | 81.9 - 84.9 | 60.6   | 56.9 - 64.4 | 34.9   | 30.8 - 39.0 | 98.7     | 97.6 - 99.7  |
|                            | 2005-2009           | 16.0   | 14.5 - 17.5 | 75.4                 | 70.6 - 80.1  | 83.0   | 81.6 - 84.4 | 58.8   | 55.3 - 62.4 | 37.2   | 33.4 - 41.0 | 99.0     | 98.1 - 99.9  |
|                            | 2010-2014           | 17.6   | 14.9 - 20.3 | 75.1                 | 68.2 - 81.9  | 84.1   | 82.0 - 86.3 | 63.5   | 57.9 - 69.1 | 37.3   | 32.0 - 42.6 | 98.4     | 97.0 - 99.8  |
| Uruguay *                  | 2000-2004           | -      | -           | -                    | -            | -      | -           | -      | -           | -      | -           | -        | -            |
|                            | 2005-2009           | 9.9 §  | 8.3 - 11.5  | -                    | -            | -      | -           | 55.7   | 51.6 - 59.8 | 37.4   | 31.9 - 42.8 | 84.7     | 82.1 - 87.3  |
|                            | 2010-2014           | 9.0 §  | 7.4 - 10.6  | -                    | -            | -      | -           | 56.5   | 51.8 - 61.1 | 37.4 § | 31.4 - 43.4 | 86.5     | 83.7 - 89.3  |
| AMERICA (NORTH)            |                     |        |             |                      |              |        |             |        |             |        |             |          |              |
| Canada<br>(9 registries)   | 2000-2004           | 16.3   | 15.9 - 16.6 | 87.9                 | 87.3 - 88.6  | 85.9   | 85.5 - 86.4 | 67.9   | 66.4 - 69.5 | 37.6   | 36.6 - 38.6 | 93.0     | 92.6 - 93.3  |
|                            | 2005-2009           | 18.5   | 18.1 - 18.8 | 88.5                 | 88.0 - 89.1  | 87.6   | 87.2 - 88.0 | 66.9   | 65.3 - 68.5 | 41.0   | 40.0 - 42.0 | 94.2     | 93.9 - 94.5  |
|                            | 2010-2014           | 20.6   | 20.2 - 20.9 | 89.1                 | 88.6 - 89.6  | 88.2   | 87.8 - 88.6 | 66.6   | 65.1 - 68.1 | 40.9   | 39.9 - 41.8 | 93.6     | 93.3 - 94.0  |
| Alberta                    | 2000-2004           | 13.2   | 12.3 - 14.1 | 86.9                 | 85.0 - 88.9  | 86.0   | 84.7 - 87.3 | 70.6   | 66.3 - 74.9 | 32.3   | 29.3 - 35.2 | 90.7     | 89.6 - 91.7  |
|                            | 2005-2009           | 16.4   | 15.4 - 17.4 | 88.5                 | 86.7 - 90.2  | 87.7   | 86.5 - 88.9 | 67.1   | 62.4 - 71.8 | 36.1   | 33.1 - 39.2 | 91.6     | 90.5 - 92.6  |
|                            | 2010-2014           | 19.1   | 18.0 - 20.2 | 90.2                 | 88.6 - 91.9  | 89.6   | 88.5 - 90.8 | 66.5   | 62.0 - 71.1 | 35.8   | 32.9 - 38.6 | 91.7     | 90.7 - 92.7  |
| British Columbia           | 2000-2004           | 14.6   | 13.8 - 15.3 | 91.2                 | 89.8 - 92.6  | 86.8   | 85.8 - 87.8 | 70.9   | 67.0 - 74.8 | 36.5   | 33.9 - 39.0 | 93.0     | 92.1 - 93.8  |
|                            | 2005-2009           | 18.3   | 17.5 - 19.1 | 90.7                 | 89.5 - 91.9  | 88.8   | 87.9 - 89.8 | 70.8   | 66.9 - 74.8 | 38.3   | 35.9 - 40.7 | 93.9     | 93.1 - 94.7  |
|                            | 2010-2014           | 19.7   | 18.9 - 20.6 |                      |              |        |             |        |             |        |             |          |              |

**Web-table 4.2: Age-standardised five-year net survival (NS, %): adults (15-99 years) diagnosed with cancer of the lung, melanoma of the skin, cancer of the breast, ovary, cervix or prostate, by continent, country, registry and calendar period of diagnosis (2000-2004, 2005-2009, 2010-2014)**

|                                  | Period of diagnosis | Lung   |             | Melanoma of the skin |             | Breast |             | Cervix |             | Ovary  |             | Prostate |              |
|----------------------------------|---------------------|--------|-------------|----------------------|-------------|--------|-------------|--------|-------------|--------|-------------|----------|--------------|
|                                  |                     | NS (%) | 95% CI      | NS (%)               | 95% CI      | NS (%) | 95% CI      | NS (%) | 95% CI      | NS (%) | 95% CI      | NS (%)   | 95% CI       |
| Prince Edward Island             | 2000-2004           | 10.6   | 7.8 - 13.5  | 89.9                 | 83.6 - 96.3 | 80.5   | 75.7 - 85.4 | 61.5   | 43.9 - 79.1 | 40.5   | 24.3 - 56.6 | 88.5     | 84.1 - 93.0  |
|                                  | 2005-2009           | 15.1   | 12.0 - 18.3 | 90.9                 | 84.9 - 96.8 | 83.2   | 78.4 - 87.9 | 66.3   | 49.7 - 82.9 | 47.1   | 31.2 - 63.1 | 89.9     | 86.5 - 93.4  |
|                                  | 2010-2014           | 14.2   | 11.3 - 17.1 | 93.2                 | 87.5 - 98.9 | 88.7   | 83.9 - 93.4 | 73.7   | 57.1 - 90.2 | 41.8   | 30.6 - 53.0 | 89.0     | 85.7 - 92.4  |
| Saskatchewan                     | 2000-2004           | 15.3   | 13.5 - 17.1 | 86.8                 | 83.2 - 90.3 | 85.0   | 83.0 - 87.0 | 63.4   | 55.4 - 71.4 | 33.0   | 28.2 - 37.9 | 89.0     | 87.3 - 90.7  |
|                                  | 2005-2009           | 16.1   | 14.5 - 17.7 | 83.1                 | 79.6 - 86.6 | 87.2   | 85.3 - 89.1 | 56.9   | 49.5 - 64.3 | 40.0   | 34.9 - 45.1 | 91.2     | 89.6 - 92.8  |
|                                  | 2010-2014           | 17.9   | 16.1 - 19.8 | 85.0                 | 81.5 - 88.5 | 87.5   | 85.6 - 89.4 | 58.4   | 48.9 - 67.9 | 41.7   | 36.7 - 46.8 | 90.9     | 89.2 - 92.6  |
| United States<br>(48 registries) | 2000-2004           | 17.0   | 16.9 - 17.1 | 88.9                 | 88.7 - 89.1 | 88.9   | 88.7 - 89.0 | 64.3   | 63.7 - 64.8 | 40.4   | 40.0 - 40.7 | 97.5     | 97.3 - 97.6  |
|                                  | 2005-2009           | 19.4   | 19.3 - 19.5 | 90.4                 | 90.2 - 90.6 | 89.8   | 89.6 - 89.9 | 63.0   | 62.5 - 63.5 | 42.0   | 41.7 - 42.4 | 98.1     | 98.0 - 98.2  |
|                                  | 2010-2014           | 21.2   | 21.1 - 21.3 | 90.8                 | 90.6 - 91.0 | 90.2   | 90.1 - 90.4 | 62.6   | 62.0 - 63.1 | 43.4   | 43.1 - 43.8 | 97.4     | 97.3 - 97.5  |
| Alabama                          | 2000-2004           | 14.6   | 14.0 - 15.3 | 86.7                 | 84.9 - 88.4 | 89.0   | 87.8 - 90.1 | 60.5   | 57.0 - 63.9 | 37.9   | 35.4 - 40.4 | 97.3     | 96.1 - 98.4  |
|                                  | 2005-2009           | 16.3   | 15.7 - 17.0 | 91.1                 | 89.7 - 92.5 | 88.9   | 87.8 - 90.0 | 56.8   | 53.3 - 60.2 | 39.4   | 36.9 - 41.8 | 97.3     | 96.3 - 98.3  |
|                                  | 2010-2014           | 16.9   | 16.2 - 17.6 | 92.3                 | 91.0 - 93.6 | 89.1   | 88.0 - 90.1 | 53.8   | 50.4 - 57.2 | 40.3   | 37.8 - 42.7 | 95.8     | 94.8 - 96.8  |
| Alaska                           | 2000-2004           | 15.7   | 13.5 - 17.8 | 87.1                 | 80.6 - 93.6 | 89.3   | 85.6 - 93.0 | 72.4   | 63.4 - 81.4 | 37.1   | 29.1 - 45.1 | 95.2     | 92.0 - 98.3  |
|                                  | 2005-2009           | 19.2   | 17.0 - 21.4 | 82.2                 | 76.4 - 88.1 | 87.0   | 83.7 - 90.4 | 77.2   | 69.6 - 84.9 | 45.0   | 37.2 - 52.7 | 97.8     | 94.6 - 100.0 |
|                                  | 2010-2014           | 17.8   | 15.5 - 20.2 | 81.1                 | 75.4 - 86.7 | 86.8   | 83.1 - 90.5 | 52.3   | 43.1 - 61.6 | 48.8   | 38.6 - 59.0 | 96.4     | 92.8 - 100.0 |
| Arkansas                         | 2000-2004           | 14.2   | 13.5 - 14.9 | 84.0                 | 81.6 - 86.4 | 89.3   | 87.9 - 90.6 | 61.0   | 56.5 - 65.5 | 35.3   | 32.1 - 38.6 | 97.9     | 96.7 - 99.2  |
|                                  | 2005-2009           | 17.0   | 16.2 - 17.8 | 87.0                 | 85.0 - 89.1 | 89.1   | 87.7 - 90.5 | 62.1   | 57.7 - 66.5 | 39.4   | 36.0 - 42.8 | 98.4     | 97.2 - 99.7  |
|                                  | 2010-2014           | 16.9   | 15.6 - 18.2 | 85.8                 | 82.7 - 89.0 | 89.8   | 87.6 - 91.9 | 61.0   | 54.5 - 67.6 | 42.1   | 36.4 - 47.8 | 98.2     | 96.2 - 100.0 |
| California                       | 2000-2004           | 16.6   | 16.3 - 16.9 | 89.7                 | 89.2 - 90.2 | 90.0   | 89.7 - 90.4 | 67.6   | 66.3 - 69.0 | 40.3   | 39.3 - 41.2 | 97.9     | 97.6 - 98.3  |
|                                  | 2005-2009           | 19.2   | 18.9 - 19.5 | 90.8                 | 90.4 - 91.3 | 90.9   | 90.5 - 91.2 | 66.9   | 65.6 - 68.3 | 42.4   | 41.5 - 43.4 | 97.7     | 97.4 - 98.1  |
|                                  | 2010-2014           | 20.5   | 20.0 - 21.1 | 90.4                 | 89.7 - 91.1 | 90.5   | 90.0 - 91.1 | 65.9   | 63.8 - 68.1 | 43.2   | 41.8 - 44.7 | 97.0     | 96.5 - 97.5  |
| Greater Bay Area                 | 2000-2004           | 16.5   | 15.8 - 17.2 | 89.9                 | 88.6 - 91.1 | 90.8   | 90.0 - 91.7 | 68.4 § | 65.1 - 71.8 | 41.6   | 39.4 - 43.9 | 98.6     | 97.9 - 99.4  |
|                                  | 2005-2009           | 19.8   | 19.0 - 20.6 | 92.8                 | 91.8 - 93.8 | 92.8   | 92.0 - 93.6 | 70.5 § | 67.1 - 74.0 | 42.7   | 40.6 - 44.8 | 98.4     | 97.7 - 99.1  |
|                                  | 2010-2014           | 22.8   | 21.9 - 23.6 | 94.1                 | 93.2 - 95.0 | 92.5   | 91.7 - 93.3 | 67.6 § | 64.3 - 70.9 | 44.4   | 42.2 - 46.5 | 97.6     | 96.9 - 98.3  |
| Greater California               | 2000-2004           | 15.7   | 15.3 - 16.1 | 89.4                 | 88.8 - 90.1 | 89.8   | 89.3 - 90.3 | 65.4   | 63.4 - 67.4 | 39.4   | 38.1 - 40.7 | 96.9     | 96.4 - 97.4  |
|                                  | 2005-2009           | 18.1   | 17.6 - 18.5 | 90.0                 | 89.4 - 90.6 | 90.2   | 89.8 - 90.7 | 63.9   | 61.9 - 65.8 | 41.5   | 40.3 - 42.7 | 96.4     | 96.0 - 96.9  |
|                                  | 2010-2014           | 19.9   | 19.5 - 20.4 | 89.7 §               | 89.1 - 90.3 | 90.2   | 89.7 - 90.7 | 61.6   | 59.7 - 63.6 | 41.9   | 40.7 - 43.2 | 94.9 §   | 94.4 - 95.3  |
| Los Angeles                      | 2000-2004           | 16.9   | 16.2 - 17.5 | 88.6                 | 87.4 - 89.8 | 89.1   | 88.4 - 89.9 | 66.8 § | 64.5 - 69.2 | 39.7   | 37.9 - 41.6 | 98.2     | 97.5 - 98.9  |
|                                  | 2005-2009           | 19.1   | 18.4 - 19.8 | 89.6                 | 88.4 - 90.7 | 89.6 § | 88.9 - 90.4 | 64.9 § | 62.5 - 67.4 | 41.6   | 39.8 - 43.4 | 98.2     | 97.5 - 98.8  |
|                                  | 2010-2014           | 20.9   | 20.1 - 21.6 | 88.9 §               | 87.7 - 90.1 | 89.0 § | 88.3 - 89.8 | 62.8 § | 60.2 - 65.4 | 43.8 § | 41.9 - 45.7 | 96.5 §   | 95.8 - 97.2  |
| Colorado                         | 2000-2004           | 16.9   | 16.0 - 17.8 | 89.6                 | 88.1 - 91.0 | 91.3   | 90.2 - 92.3 | 67.6   | 63.2 - 72.0 | 41.2   | 38.4 - 43.9 | 96.8     | 95.7 - 97.8  |
|                                  | 2005-2009           | 21.2   | 20.2 - 22.2 | 90.8                 | 89.6 - 92.0 | 92.9   | 91.9 - 93.9 | 62.9   | 58.7 - 67.0 | 42.7   | 40.3 - 45.2 | 98.7     | 97.8 - 99.6  |
|                                  | 2010-2014           | 23.8   | 22.6 - 24.9 | 91.0                 | 89.6 - 92.3 | 92.9   | 91.8 - 94.0 | 64.3   | 59.5 - 69.0 | 41.1   | 38.4 - 43.8 | 98.8     | 97.8 - 99.9  |
| Connecticut                      | 2000-2004           | 20.5   | 19.7 - 21.3 | 91.1                 | 89.8 - 92.4 | 89.4   | 88.4 - 90.4 | 62.0   | 57.8 - 66.2 | 42.3   | 39.6 - 45.0 | 97.5     | 96.6 - 98.4  |
|                                  | 2005-2009           | 23.2   | 22.4 - 24.1 | 93.0                 | 91.8 - 94.1 | 90.5   | 89.5 - 91.5 | 65.5   | 61.1 - 69.9 | 42.3   | 39.8 - 44.9 | 97.0     | 96.1 - 97.9  |
|                                  | 2010-2014           | 24.8   | 23.8 - 25.7 | 92.1                 | 90.9 - 93.3 | 91.2   | 90.2 - 92.2 | 65.0   | 60.4 - 69.6 | 43.9   | 41.3 - 46.5 | 95.5     | 94.6 - 96.5  |
| Delaware                         | 2000-2004           | 17.3   | 15.8 - 18.8 | 88.9                 | 85.7 - 92.2 | 88.6   | 86.3 - 90.9 | 55.5   | 48.0 - 62.9 | 43.1   | 37.1 - 49.0 | 98.3     | 96.2 - 100.0 |
|                                  | 2005-2009           | 18.2   | 16.7 - 19.6 | 92.5                 | 90.1 - 94.8 | 88.0   | 85.9 - 90.2 | 69.7   | 61.2 - 78.1 | 39.5   | 33.7 - 45.3 | 99.1     | 97.0 - 100.0 |
|                                  | 2010-2014           | 20.4   | 18.8 - 22.0 | 93.9                 | 91.8 - 96.0 | 88.8   | 86.7 - 90.9 | 60.7   | 53.4 - 68.0 | 40.3   | 34.5 - 46.1 | 96.9     | 94.9 - 98.9  |
| Florida                          | 2000-2004           | 18.9   | 18.5 - 19.2 | 86.3                 | 85.6 - 86.9 | 88.6   | 88.2 - 89.0 | 64.1   | 62.4 - 65.7 | 40.9   | 39.8 - 42.1 | 96.7     | 96.3 - 97.1  |
|                                  | 2005-2009           | 21.2   | 20.8 - 21.5 | 88.0                 | 87.4 - 88.6 | 89.0   | 88.6 - 89.5 | 63.4   | 61.8 - 65.1 | 41.8   | 40.6 - 42.9 | 97.6     | 97.2 - 98.0  |
|                                  | 2010-2014           | 22.5   | 22.1 - 23.0 | 87.9                 | 87.3 - 88.6 | 89.2   | 88.7 - 89.6 | 61.8   | 60.0 - 63.7 | 43.2   | 41.9 - 44.5 | 96.6     | 96.1 - 97.0  |
| Georgia                          | 2000-2004           | 14.8   | 14.3 - 15.3 | 91.6                 | 90.4 - 92.7 | 87.8   | 86.9 - 88.7 | 61.4   | 58.8 - 64.0 | 38.7   | 36.7 - 40.7 | 97.4     | 96.5 - 98.3  |
|                                  | 2005-2009           | 17.4   | 16.9 - 17.9 | 92.8                 | 91.9 - 93.7 | 87.8   | 87.0 - 88.7 | 58.1   | 55.4 - 60.7 | 39.4   | 37.6 - 41.2 | 98.3     | 97.5 - 99.1  |
|                                  | 2010-2014           | 19.3   | 18.8 - 19.9 | 93.2                 | 92.4 - 94.1 | 88.2   | 87.4 - 89.0 | 58.4   | 55.8 - 61.0 | 41.3   | 39.4 - 43.2 | 97.1     | 96.3 - 97.9  |
| Atlanta                          | 2000-2004           | 15.6   | 14.6 - 16.6 | 94.7                 | 92.9 - 96.5 | 88.8   | 87.2 - 90.4 | 66.9   | 61.9 - 71.9 | 41.2   | 37.5 - 44.9 | 98.6     | 96.9 - 100.0 |
|                                  | 2005-2009           | 20.3   | 19.2 - 21.4 | 96.0                 | 94.5 - 97.6 | 88.5   | 87.0 - 90.0 | 61.9   | 57.1 - 66.6 | 43.6   | 40.0 - 47.1 | 98.5     | 97.1 - 99.9  |
|                                  | 2010-2014           | 22.6   | 21.4 - 23.8 | 95.9                 | 94.5 - 97.4 | 89.4   | 88.0 - 90.9 | 58.9   | 54.3 - 63.5 | 44.4   | 41.0 - 47.8 | 97.8     | 96.4 - 99.1  |
| Hawaii                           | 2000-2004           | 17.7   | 16.2 - 19.2 | 94.0                 | 91.5 - 96.4 | 90.5   | 88.7 - 92.2 | 63.1   | 55.8 - 70.3 | 44.6   | 39.4 - 49.8 | 96.8     | 95.4 - 98.3  |
|                                  | 2005-2009           | 19.8   | 18.2 - 21.3 | 93.1                 | 90.8 - 95.3 | 92.1   | 90.5 - 93.8 | 66.7   | 60.2 - 73.2 | 40.7   | 36.0 - 45.5 | 97.6     | 96.2 - 99.0  |
|                                  | 2010-2014           | 19.6   | 18.1 - 21.2 | 92.3                 | 90.1 - 94.6 | 92.1   | 90.5 - 93.6 | 63.9   | 57.4 - 70.3 | 43.0   | 38.0 - 48.0 | 96.6     | 95.1 - 98.2  |
| Idaho                            | 2000-2004           | 15.5   | 14.0 - 16.9 | 91.5                 | 89.2 - 93.8 | 92.0   | 90.2 - 93.8 | 66.5   | 59.1 - 73.9 | 40.8   | 36.0 - 45.6 | 97.2     | 95.6 - 98.7  |
|                                  | 2005-2009           | 17.5   | 16.0 - 19.0 | 90.5                 | 88.5 - 92.6 | 90.2   | 88.4 - 92.0 | 63.1   | 55.8 - 70.4 | 43.5   | 39.1 - 47.9 | 98.1     | 96.7 - 99.6  |
|                                  | 2010-2014           | 19.3   | 17.7 - 21.0 | 90.7                 | 88.7 - 92.7 | 91.1   | 89.3 - 92.8 | 61.1   | 55.3 - 67.0 | 43.4   | 38.9 - 47.9 | 96.4     | 94.9 - 97.9  |
| Indiana                          | 2000-2004           | 15.4   | 14.8 - 15.9 | 88.7                 | 87.3 - 90.1 | 89.1   | 88.2 - 90.0 | 62.7   | 59.6 - 65.9 | 38.9   | 36.8 - 41.0 | 97.7     | 96.7 - 98.6  |
|                                  | 2005-2009           | 16.9   | 16.3 - 17.4 | 88.2                 | 87.0 - 89.5 | 89.1   | 88.3 - 90.0 | 59.4   | 56.1 - 62.6 | 38.2   | 36.1 - 40.2 | 98.0     | 97.1 - 98.9  |
|                                  | 2010-2014           | 17.5   | 17.0 - 18.1 | 87.2                 | 86.0 - 88.4 | 89.9   | 89.0 - 90.8 | 59.3   | 56.0 - 62.6 | 38.9   | 36.8 - 41.0 | 95.9     | 95.0 - 96.9  |
| Iowa                             | 2000-2004           | 14.5   | 13.7 - 15.3 | 88.7                 | 86.9 - 90.4 | 89.4   | 88.4 - 90.5 | 61.9   | 57.3 - 66.5 | 38.1   | 35.4 - 40.8 | 96.1     | 95.1 - 97.2  |
|                                  | 2005-2009           | 17.4   | 16.6 - 18.3 | 89.6                 | 88.0 - 91.1 | 90.0   | 88.8 - 91.1 | 63.8   | 58.9 - 68.8 | 36.7   | 34.1 - 39.4 | 97.1     | 96.0 - 98.1  |
|                                  | 2010-2014           | 18.2   | 17.3 - 19.2 | 90.7                 | 89.3 - 92.1 | 90.3   | 89.1 - 91.4 | 63.0   | 58.1 - 67.9 | 38.7   | 36.0 - 41.4 | 96.1     | 95.0 - 97.2  |
| Kentucky                         | 2000-2004           | 14.5   | 14.0 - 15.1 | 88.3                 | 86.7 - 89.8 | 88.1   | 87.0 - 89.3 | 66.1   | 62.5 - 69.7 | 37.9   | 35.3 - 40.5 | 97.6     | 96.5 - 98.7  |
|                                  | 2005-2009           | 16.7   | 16.1 - 17.3 | 90.0                 | 88.7 - 91.4 | 88.5   | 87.4 - 89.7 | 58.2   | 54.6 - 61.8 | 40.4   | 37.7 - 43.1 | 97.5     | 96.4 - 98.7  |
|                                  | 2010-2014           | 17.2   | 16.6 - 17.8 | 91.0                 | 89.7 - 92.4 | 89.0   | 87.8 - 90.1 | 58.5   | 54.9 - 62.1 | 40.6   | 38.0 - 43.3 | 97.1     | 95.9 - 98.2  |
| Louisiana                        | 2000-2004           | 13.2   | 12.6 - 13.8 | 84.3                 | 82.2 - 86.4 | 85.1   | 83.9 - 86.2 | 58.4   | 54.8 - 62.0 | 34.4   | 31.7 - 37.0 | 97.2     | 96.2 - 98.2  |
|                                  | 2005-2009           | 15.0   | 14.4 - 15.7 | 87.9                 | 86.1 - 89.7 | 87.0   | 85.9 - 88.2 | 57.3   | 53.5 - 61.1 | 39.0   | 36.2 - 41.8 | 98.7     | 97.7 - 99.8  |
|                                  | 2010-2014           | 16.5   | 15.8 - 17.2 | 88.3                 | 86.6 - 90.1 | 87.1   | 86.0 - 88.2 | 58.7   | 54.9 - 62.5 | 40.2   | 37.3 - 43.0 | 98.5     | 97.5 - 99.6  |
| Maine                            | 2000-2004           | 15.6   | 14.5 - 16.7 | 91.8                 | 89.6 - 94.0 | 90.2   | 88.5 - 91.9 | 70.4   | 64.2 - 76.7 | 38.9   | 34.7 - 43.1 | 97.6     | 96.1 - 99.2  |
|                                  | 2005-2009           | 20.0   | 18.8 - 21.2 | 91.9                 | 89.9 - 93.9 | 91.5   | 89.9 - 93.1 | 61.3   | 54.9 - 67.8 | 41.0   | 36.7 - 45.3 | 97.9     | 96           |

**Web-table 4.2: Age-standardised five-year net survival (NS, %): adults (15-99 years) diagnosed with cancer of the lung, melanoma of the skin, cancer of the breast, ovary, cervix or prostate, by continent, country, registry and calendar period of diagnosis (2000-2004, 2005-2009, 2010-2014)**

|                | Period of diagnosis | Lung   |             | Melanoma of the skin |             | Breast |             | Cervix |             | Ovary  |             | Prostate |              |
|----------------|---------------------|--------|-------------|----------------------|-------------|--------|-------------|--------|-------------|--------|-------------|----------|--------------|
|                |                     | NS (%) | 95% CI      | NS (%)               | 95% CI      | NS (%) | 95% CI      | NS (%) | 95% CI      | NS (%) | 95% CI      | NS (%)   | 95% CI       |
| Mississippi    | 2000-2004           | 14.6   | 13.6 - 15.7 | 86.8                 | 83.9 - 89.7 | 86.1   | 84.1 - 88.1 | 55.6   | 50.7 - 60.6 | 39.4   | 34.8 - 44.0 | 99.3     | 97.5 - 100.0 |
|                | 2005-2009           | 16.4   | 15.6 - 17.2 | 87.6                 | 85.6 - 89.6 | 86.9   | 85.5 - 88.4 | 52.8   | 48.6 - 57.0 | 40.7   | 37.2 - 44.2 | 98.0     | 96.6 - 99.4  |
|                | 2010-2014           | 16.8   | 16.0 - 17.7 | 89.7                 | 87.8 - 91.6 | 86.1   | 84.7 - 87.5 | 56.6   | 52.6 - 60.6 | 41.9   | 38.3 - 45.5 | 97.1     | 95.7 - 98.5  |
| Missouri       | 2000-2004           | -      | -           | -                    | -           | 87.7   | 86.8 - 88.6 | -      | -           | -      | -           | -        | -            |
|                | 2005-2009           | -      | -           | -                    | -           | 89.8   | 89.0 - 90.7 | -      | -           | -      | -           | -        | -            |
|                | 2010-2014           | -      | -           | -                    | -           | 89.4   | 87.4 - 91.3 | -      | -           | -      | -           | -        | -            |
| Montana        | 2000-2004           | 16.3   | 14.8 - 17.9 | 87.0                 | 83.9 - 90.2 | 91.5   | 89.4 - 93.7 | 66.3   | 58.7 - 73.8 | 42.5   | 37.4 - 47.5 | 97.3     | 95.6 - 99.1  |
|                | 2005-2009           | 20.0   | 18.3 - 21.7 | 89.5                 | 86.7 - 92.2 | 91.2   | 89.2 - 93.3 | 70.9   | 62.4 - 79.4 | 39.4   | 34.7 - 44.2 | 96.3     | 94.5 - 98.2  |
|                | 2010-2014           | 21.2   | 19.4 - 22.9 | 90.9                 | 88.5 - 93.4 | 90.0   | 88.0 - 92.0 | 66.5   | 59.6 - 73.3 | 42.6   | 37.5 - 47.7 | 97.1     | 95.2 - 98.9  |
| Nebraska       | 2000-2004           | 15.5   | 14.4 - 16.6 | 86.3                 | 83.7 - 88.9 | 89.0   | 87.5 - 90.4 | 62.8   | 56.9 - 68.6 | 38.3   | 34.4 - 42.2 | 96.6     | 95.2 - 97.9  |
|                | 2005-2009           | 20.3   | 19.0 - 21.6 | 89.0                 | 86.9 - 91.1 | 90.2   | 88.7 - 91.7 | 62.3   | 55.4 - 69.2 | 40.3   | 36.3 - 44.3 | 98.1     | 96.7 - 99.4  |
|                | 2010-2014           | 20.6   | 19.2 - 21.9 | 88.2                 | 86.1 - 90.3 | 88.9   | 87.4 - 90.4 | 57.4   | 51.0 - 63.7 | 42.5   | 38.4 - 46.7 | 97.5     | 96.0 - 98.9  |
| New Hampshire  | 2000-2004           | 16.7   | 15.5 - 18.0 | 90.4                 | 88.3 - 92.6 | 91.4   | 89.6 - 93.1 | 68.6   | 60.6 - 76.6 | 43.4   | 38.4 - 48.3 | 97.0     | 95.2 - 98.7  |
|                | 2005-2009           | 21.7   | 20.4 - 23.1 | 92.7                 | 90.7 - 94.6 | 93.2   | 91.6 - 94.8 | 65.9   | 59.0 - 72.7 | 43.7   | 39.2 - 48.1 | 98.1     | 96.4 - 99.8  |
|                | 2010-2014           | 24.8   | 23.3 - 26.2 | 95.0                 | 93.1 - 96.8 | 94.3   | 92.7 - 95.9 | 67.9   | 61.0 - 74.9 | 44.1   | 39.6 - 48.5 | 96.9     | 95.2 - 98.6  |
| New Jersey     | 2000-2004           | 17.5   | 17.0 - 18.0 | 90.3 §               | 89.4 - 91.3 | 86.9 § | 86.2 - 87.6 | 61.9 § | 59.6 - 64.3 | 39.8 § | 38.2 - 41.5 | 98.8 §   | 98.2 - 99.4  |
|                | 2005-2009           | 21.8   | 21.2 - 22.3 | 92.1 §               | 91.3 - 92.9 | 88.1 § | 87.4 - 88.8 | 64.3 § | 61.9 - 66.7 | 41.7 § | 40.0 - 43.3 | 98.4 §   | 97.8 - 99.1  |
|                | 2010-2014           | 23.0   | 22.4 - 23.6 | 91.2 §               | 90.3 - 92.0 | 88.1 § | 87.4 - 88.8 | 60.5 § | 58.0 - 62.9 | 43.8 § | 42.1 - 45.5 | 97.6 §   | 97.0 - 98.3  |
| New Mexico     | 2000-2004           | 14.0   | 12.7 - 15.3 | 88.3                 | 86.1 - 90.6 | 90.0   | 88.3 - 91.7 | 60.5   | 55.2 - 65.7 | 39.4   | 35.3 - 43.4 | 96.7     | 95.2 - 98.2  |
|                | 2005-2009           | 17.2   | 15.7 - 18.6 | 87.2                 | 85.1 - 89.4 | 87.9   | 86.2 - 89.6 | 56.2   | 50.8 - 61.6 | 40.3   | 36.3 - 44.3 | 95.5     | 94.0 - 96.9  |
|                | 2010-2014           | 18.6   | 17.2 - 20.1 | 86.4                 | 84.1 - 88.7 | 88.6   | 87.0 - 90.2 | 60.8   | 55.0 - 66.6 | 39.2   | 35.4 - 43.0 | 92.9     | 91.4 - 94.4  |
| New York       | 2000-2004           | 18.7   | 18.3 - 19.0 | -                    | -           | 87.3   | 86.8 - 87.7 | 65.1   | 63.5 - 66.7 | 39.8   | 38.7 - 40.9 | 95.9     | 95.5 - 96.4  |
|                | 2005-2009           | 22.9   | 22.6 - 23.3 | -                    | -           | 89.5   | 89.1 - 89.9 | 65.4   | 63.8 - 67.0 | 43.3   | 42.1 - 44.4 | 97.5     | 97.1 - 97.9  |
|                | 2010-2014           | 25.7   | 25.2 - 26.1 | -                    | -           | 90.6   | 90.2 - 91.1 | 64.3   | 62.6 - 65.9 | 45.3   | 44.2 - 46.5 | 97.6     | 97.2 - 98.0  |
| New York City  | 2000-2004           | 20.0   | 19.4 - 20.6 | -                    | -           | 84.5   | 83.7 - 85.2 | 66.7   | 64.5 - 68.9 | 39.1   | 37.2 - 41.0 | 94.0     | 93.3 - 94.7  |
|                | 2005-2009           | 24.9   | 24.2 - 25.6 | -                    | -           | 87.6   | 86.9 - 88.4 | 67.4   | 65.3 - 69.6 | 43.3   | 41.4 - 45.2 | 96.9     | 96.2 - 97.6  |
|                | 2010-2014           | 28.2   | 27.4 - 28.9 | -                    | -           | 89.0   | 88.3 - 89.8 | 66.7   | 64.4 - 68.9 | 45.9   | 44.0 - 47.9 | 97.5     | 96.8 - 98.3  |
| North Carolina | 2000-2004           | 16.4   | 15.9 - 16.9 | 88.5                 | 87.4 - 89.7 | 88.5   | 87.7 - 89.2 | 63.0   | 60.2 - 65.8 | 40.9   | 39.0 - 42.7 | 97.4     | 96.6 - 98.2  |
|                | 2005-2009           | 18.8   | 18.3 - 19.3 | 91.3                 | 90.4 - 92.2 | 89.5   | 88.8 - 90.3 | 63.5   | 60.7 - 66.2 | 43.1   | 41.3 - 44.9 | 98.1     | 97.4 - 98.9  |
|                | 2010-2014           | 20.3   | 19.7 - 20.8 | 92.6                 | 91.8 - 93.5 | 90.4   | 89.7 - 91.1 | 63.3   | 60.6 - 66.0 | 44.7   | 42.8 - 46.5 | 97.3     | 96.5 - 98.0  |
| Ohio           | 2000-2004           | 15.4   | 15.0 - 15.8 | 89.5                 | 88.6 - 90.5 | 87.9   | 87.2 - 88.5 | 62.5   | 60.2 - 64.8 | 39.6   | 38.0 - 41.2 | 97.6     | 97.0 - 98.3  |
|                | 2005-2009           | 17.1   | 16.7 - 17.5 | 90.4                 | 89.6 - 91.2 | 88.5   | 87.8 - 89.1 | 57.1   | 54.8 - 59.4 | 41.7   | 40.1 - 43.3 | 97.8     | 97.2 - 98.4  |
|                | 2010-2014           | 19.9   | 19.4 - 20.3 | 90.5                 | 89.7 - 91.3 | 89.4   | 88.7 - 90.0 | 59.2   | 56.6 - 61.7 | 44.5   | 42.9 - 46.2 | 97.6     | 97.0 - 98.3  |
| Oklahoma       | 2000-2004           | 14.6   | 13.9 - 15.3 | 81.5                 | 79.5 - 83.5 | 87.2   | 86.0 - 88.4 | 60.7   | 56.6 - 64.8 | 41.3   | 38.5 - 44.2 | 95.5     | 94.3 - 96.6  |
|                | 2005-2009           | 16.6   | 15.9 - 17.4 | 87.8                 | 86.1 - 89.5 | 89.1   | 87.9 - 90.3 | 60.2   | 56.3 - 64.0 | 44.2   | 41.2 - 47.2 | 99.1     | 98.0 - 100.0 |
|                | 2010-2014           | 19.2   | 17.2 - 21.2 | 90.5                 | 86.7 - 94.2 | 89.5   | 86.7 - 92.2 | 64.3   | 56.7 - 71.9 | 42.6   | 35.7 - 49.6 | 98.9     | 96.4 - 100.0 |
| Oregon         | 2000-2004           | 15.7   | 14.9 - 16.4 | 92.6                 | 91.3 - 94.0 | 91.5   | 90.5 - 92.5 | 62.3   | 57.7 - 66.9 | 38.6   | 36.0 - 41.1 | 97.5     | 96.5 - 98.6  |
|                | 2005-2009           | 18.4   | 17.6 - 19.3 | 93.9                 | 92.7 - 95.0 | 91.6   | 90.6 - 92.6 | 64.5   | 60.1 - 69.0 | 40.6   | 38.1 - 43.2 | 97.6     | 96.6 - 98.6  |
|                | 2010-2014           | 20.4   | 19.4 - 21.5 | 93.8                 | 92.5 - 95.1 | 92.6   | 91.5 - 93.7 | 64.6   | 59.3 - 69.8 | 40.2   | 37.4 - 43.1 | 97.2     | 96.1 - 98.3  |
| Pennsylvania   | 2000-2004           | 16.0   | 15.6 - 16.3 | 88.2                 | 87.4 - 89.1 | 87.8   | 87.3 - 88.3 | 61.3   | 59.1 - 63.4 | 39.8   | 38.4 - 41.1 | 98.2     | 97.7 - 98.8  |
|                | 2005-2009           | 19.8   | 19.3 - 20.2 | 90.0                 | 89.3 - 90.8 | 89.4   | 88.9 - 89.9 | 62.3   | 60.2 - 64.4 | 42.0   | 40.7 - 43.4 | 98.8     | 98.3 - 99.3  |
|                | 2010-2014           | 22.1   | 21.6 - 22.5 | 90.9                 | 90.2 - 91.6 | 90.0   | 89.5 - 90.5 | 62.8   | 60.7 - 65.0 | 43.4   | 42.0 - 44.8 | 97.9     | 97.4 - 98.5  |
| Rhode Island   | 2000-2004           | 21.3   | 19.9 - 22.7 | 91.9                 | 89.6 - 94.2 | 89.5   | 87.7 - 91.3 | 66.7   | 59.3 - 74.1 | 39.5   | 34.8 - 44.1 | 97.3     | 95.6 - 99.0  |
|                | 2005-2009           | 22.6   | 21.1 - 24.1 | 92.5                 | 90.3 - 94.7 | 91.5   | 89.8 - 93.2 | 68.1   | 60.6 - 75.6 | 44.9   | 40.2 - 49.5 | 98.1     | 96.4 - 99.8  |
|                | 2010-2014           | 23.3   | 21.7 - 24.8 | 91.9                 | 89.7 - 94.2 | 92.7   | 91.0 - 94.5 | 71.8   | 63.5 - 80.1 | 47.5   | 42.4 - 52.6 | 98.0     | 96.1 - 99.8  |
| South Carolina | 2000-2004           | 14.8   | 14.1 - 15.4 | 90.3                 | 88.8 - 91.8 | 87.6   | 86.4 - 88.7 | 61.6   | 57.8 - 65.3 | 41.5   | 38.9 - 44.1 | 96.6     | 95.6 - 97.6  |
|                | 2005-2009           | 17.5   | 16.8 - 18.2 | 93.4                 | 92.2 - 94.6 | 87.5   | 86.5 - 88.6 | 60.1   | 56.4 - 63.9 | 41.6   | 39.0 - 44.3 | 97.6     | 96.6 - 98.6  |
|                | 2010-2014           | 18.8   | 18.0 - 19.5 | 92.4                 | 91.2 - 93.6 | 87.6   | 86.5 - 88.6 | 57.9   | 54.3 - 61.5 | 42.7   | 40.0 - 45.3 | 96.3     | 95.3 - 97.3  |
| Tennessee      | 2000-2004           | 17.7   | 17.2 - 18.3 | 86.6                 | 84.9 - 88.3 | 92.0   | 91.0 - 92.9 | 63.6   | 60.2 - 67.0 | 40.5   | 38.1 - 42.8 | 99.6     | 98.4 - 100.0 |
|                | 2005-2009           | 18.6   | 18.0 - 19.1 | 90.7                 | 89.5 - 91.8 | 90.8   | 89.9 - 91.7 | 60.4   | 57.3 - 63.6 | 41.4   | 39.2 - 43.6 | 99.4     | 98.5 - 100.0 |
|                | 2010-2014           | 18.6   | 17.7 - 19.5 | 89.3                 | 87.5 - 91.1 | 91.0   | 89.6 - 92.4 | 55.2   | 50.5 - 59.8 | 40.8   | 37.4 - 44.3 | 98.0     | 96.5 - 99.4  |
| Texas          | 2000-2004           | 16.0   | 15.6 - 16.3 | 86.1                 | 85.3 - 87.0 | 87.1   | 86.6 - 87.7 | 63.2   | 61.6 - 64.9 | 41.2   | 39.9 - 42.5 | 95.2     | 94.8 - 95.7  |
|                | 2005-2009           | 18.4   | 18.1 - 18.8 | 85.8                 | 85.1 - 86.6 | 88.8   | 88.3 - 89.3 | 62.8   | 61.1 - 64.5 | 41.9   | 40.6 - 43.1 | 96.9     | 96.5 - 97.4  |
|                | 2010-2014           | 20.5   | 20.1 - 21.0 | 87.0                 | 86.1 - 87.8 | 89.8   | 89.2 - 90.4 | 63.1   | 61.2 - 65.0 | 43.4   | 41.9 - 44.8 | 96.5     | 95.9 - 97.0  |
| Utah           | 2000-2004           | 13.5   | 11.9 - 15.0 | 88.0                 | 86.1 - 90.0 | 88.4   | 86.6 - 90.2 | 61.5 § | 54.6 - 68.5 | 38.8   | 34.9 - 42.8 | 97.6     | 96.3 - 98.9  |
|                | 2005-2009           | 18.2   | 16.5 - 19.8 | 91.9                 | 90.3 - 93.4 | 89.4   | 87.6 - 91.1 | 60.3 § | 53.4 - 67.1 | 38.1   | 34.4 - 41.9 | 98.1     | 96.9 - 99.3  |
|                | 2010-2014           | 21.6   | 19.8 - 23.4 | 92.9                 | 91.5 - 94.4 | 90.3   | 88.7 - 92.0 | 60.1 § | 53.0 - 67.2 | 41.1   | 37.2 - 44.9 | 97.0     | 95.8 - 98.2  |
| Vermont        | 2000-2004           | 17.5   | 15.7 - 19.4 | 92.2                 | 89.3 - 95.0 | 90.9   | 88.4 - 93.5 | 60.5   | 52.6 - 68.4 | 42.2   | 35.8 - 48.7 | 98.3     | 96.0 - 100.0 |
|                | 2005-2009           | 20.6   | 18.7 - 22.4 | 93.8                 | 91.3 - 96.3 | 93.0   | 90.6 - 95.4 | 63.1   | 54.5 - 71.8 | 40.0   | 34.1 - 46.0 | 98.3     | 95.8 - 100.0 |
|                | 2010-2014           | 23.3   | 20.9 - 25.6 | 93.3                 | 90.4 - 96.1 | 93.6   | 90.9 - 96.4 | 57.5   | 46.1 - 68.8 | 37.5   | 31.6 - 43.4 | 97.2     | 94.6 - 99.9  |
| Washington     | 2000-2004           | 17.6   | 16.9 - 18.2 | 92.4                 | 91.3 - 93.5 | 93.0   | 92.2 - 93.8 | 67.3   | 63.6 - 71.0 | 41.0   | 39.0 - 43.1 | 98.0     | 97.3 -       |

**Web-table 4.2: Age-standardised five-year net survival (NS, %): adults (15-99 years) diagnosed with cancer of the lung, melanoma of the skin, cancer of the breast, ovary, cervix or prostate, by continent, country, registry and calendar period of diagnosis (2000-2004, 2005-2009, 2010-2014)**

**Web-table 4.2: Age-standardised five-year net survival (NS, %): adults (15-99 years) diagnosed with cancer of the lung, melanoma of the skin, cancer of the breast, ovary, cervix or prostate, by continent, country, registry and calendar period of diagnosis (2000-2004, 2005-2009, 2010-2014)**

|                          | Period of diagnosis | Lung   |             | Melanoma of the skin |              | Breast |             | Cervix |             | Ovary  |             | Prostate |              |
|--------------------------|---------------------|--------|-------------|----------------------|--------------|--------|-------------|--------|-------------|--------|-------------|----------|--------------|
|                          |                     | NS (%) | 95% CI      | NS (%)               | 95% CI       | NS (%) | 95% CI      | NS (%) | 95% CI      | NS (%) | 95% CI      | NS (%)   | 95% CI       |
| Japan<br>(16 registries) | 2000-2004           | 29.3   | 28.1 - 30.5 | 68.9                 | 65.1 - 72.8  | 85.9   | 85.2 - 86.6 | 67.5   | 66.3 - 68.7 | 35.5   | 33.8 - 37.2 | 85.9     | 84.9 - 87.0  |
|                          | 2005-2009           | 29.3   | 28.9 - 29.7 | 68.3                 | 65.6 - 71.0  | 88.9   | 88.4 - 89.3 | 69.2   | 68.3 - 70.1 | 43.9   | 42.8 - 45.1 | 91.4     | 90.8 - 92.0  |
|                          | 2010-2014           | 32.9   | 32.3 - 33.4 | 69.0                 | 66.0 - 72.0  | 89.4   | 88.9 - 89.9 | 71.4   | 70.4 - 72.3 | 46.3   | 44.9 - 47.7 | 93.0     | 92.4 - 93.6  |
| Aichi                    | 2000-2004           | 20.7 § | 19.5 - 21.9 | 64.9                 | 55.3 - 74.5  | 86.7   | 84.6 - 88.9 | 62.4   | 58.7 - 66.0 | 38.8   | 35.0 - 42.7 | 86.4     | 83.0 - 89.7  |
|                          | 2005-2009           | 25.5   | 24.8 - 26.3 | 64.0                 | 56.7 - 71.3  | 86.8   | 85.7 - 88.0 | 66.4   | 64.2 - 68.5 | 42.0   | 39.6 - 44.5 | 90.7     | 89.4 - 92.1  |
|                          | 2010-2014           | 30.6   | 29.8 - 31.5 | 61.3                 | 53.9 - 68.6  | 88.4   | 87.2 - 89.5 | 68.5   | 66.3 - 70.7 | 45.2   | 42.4 - 47.9 | 93.1     | 91.8 - 94.5  |
| Akita                    | 2000-2004           | -      | -           | -                    | -            | -      | -           | -      | -           | -      | -           | -        | -            |
|                          | 2005-2009           | -      | -           | -                    | -            | -      | -           | -      | -           | -      | -           | -        | -            |
|                          | 2010-2014           | 12.8 § | 10.3 - 15.4 | 34.2 §               | 7.2 - 61.2   | 34.3 § | 25.0 - 43.6 | 33.0 § | 19.2 - 46.8 | 11.4 § | 6.1 - 16.7  | 42.8 §   | 35.0 - 50.6  |
| Ehime                    | 2000-2004           | -      | -           | -                    | -            | -      | -           | -      | -           | -      | -           | -        | -            |
|                          | 2005-2009           | 38.3 § | 36.1 - 40.4 | 62.8                 | 39.3 - 86.3  | 92.6   | 90.4 - 94.8 | 73.1   | 67.9 - 78.3 | 47.3 § | 42.3 - 52.4 | 94.8     | 91.3 - 98.2  |
|                          | 2010-2014           | 42.0 § | 38.5 - 45.6 | 66.0                 | 49.2 - 82.7  | 90.4   | 87.4 - 93.3 | 77.2   | 69.1 - 85.3 | 47.0 § | 39.4 - 54.6 | 95.3     | 91.4 - 99.2  |
| Fukui                    | 2000-2004           | 30.2   | 27.0 - 33.5 | 59.3 §               | 27.1 - 91.5  | 89.4   | 84.9 - 93.9 | 70.3   | 61.5 - 79.0 | 41.5   | 32.9 - 50.1 | 89.1     | 85.2 - 93.1  |
|                          | 2005-2009           | 34.9   | 32.5 - 37.3 | 57.5                 | 34.6 - 80.4  | 87.9   | 84.8 - 91.1 | 72.0   | 66.1 - 78.0 | 38.9   | 31.9 - 45.9 | 90.7     | 87.2 - 94.2  |
|                          | 2010-2014           | -      | -           | -                    | -            | -      | -           | -      | -           | -      | -           | -        | -            |
| Gunma                    | 2000-2004           | 20.6 § | 17.4 - 23.8 | -                    | -            | 57.4 § | 49.8 - 65.0 | 18.8 § | 7.4 - 30.3  | 17.2 § | 8.4 - 25.9  | 65.9 §   | 59.4 - 72.3  |
|                          | 2005-2009           | 24.1 § | 22.5 - 25.7 | 64.0                 | 48.3 - 79.7  | 84.2 § | 82.0 - 86.5 | 61.6 § | 57.3 - 65.8 | 39.2 § | 34.4 - 43.9 | 89.9     | 87.6 - 92.3  |
|                          | 2010-2014           | 24.8 § | 22.9 - 26.8 | 71.5 §               | 61.1 - 81.8  | 86.6 § | 84.1 - 89.1 | 66.1 § | 60.8 - 71.4 | 42.4 § | 36.8 - 47.9 | 90.1 §   | 87.6 - 92.7  |
| Hiroshima                | 2000-2004           | 33.8 § | 31.1 - 36.5 | 72.8                 | 52.2 - 93.4  | 87.0   | 83.5 - 90.4 | 63.8   | 57.0 - 70.6 | 42.9 § | 35.6 - 50.2 | 93.7     | 89.3 - 98.1  |
|                          | 2005-2009           | 36.5   | 35.2 - 37.8 | 68.4                 | 54.6 - 82.3  | 92.2   | 90.7 - 93.7 | 75.2   | 72.0 - 78.4 | 49.2   | 45.1 - 53.2 | 94.7     | 92.8 - 96.7  |
|                          | 2010-2014           | -      | -           | -                    | -            | -      | -           | -      | -           | -      | -           | -        | -            |
| Hyogo                    | 2000-2004           | -      | -           | -                    | -            | -      | -           | -      | -           | -      | -           | -        | -            |
|                          | 2005-2009           | 27.0 § | 25.9 - 28.2 | 75.0                 | 68.3 - 81.7  | 86.8 § | 84.9 - 88.7 | 68.8   | 65.7 - 71.8 | 43.3 § | 39.8 - 46.7 | 91.5 §   | 89.2 - 93.8  |
|                          | 2010-2014           | 36.8 § | 34.5 - 39.0 | 73.9                 | 64.1 - 83.7  | 91.9 § | 90.0 - 93.7 | 71.4   | 67.1 - 75.7 | 54.2 § | 48.9 - 59.5 | 96.9 §   | 93.8 - 100.0 |
| Ibaraki                  | 2000-2004           | -      | -           | -                    | -            | -      | -           | -      | -           | -      | -           | -        | -            |
|                          | 2005-2009           | 29.7 § | 28.3 - 31.1 | 56.0                 | 43.8 - 68.2  | 88.2   | 86.3 - 90.1 | 70.6   | 67.2 - 74.0 | 46.6   | 42.4 - 50.9 | 88.2     | 85.5 - 90.8  |
|                          | 2010-2014           | 47.0 § | 45.1 - 48.9 | 71.0                 | 57.5 - 84.5  | 93.0   | 90.4 - 95.5 | 77.9   | 73.8 - 81.9 | 62.2   | 56.3 - 68.1 | 98.6     | 96.8 - 100.0 |
| Kanagawa                 | 2000-2004           | 27.7 § | 26.8 - 28.5 | 75.1                 | 69.3 - 80.8  | 87.0   | 85.8 - 88.2 | 70.0   | 67.9 - 72.0 | 46.7 § | 44.0 - 49.4 | 86.8     | 85.2 - 88.5  |
|                          | 2005-2009           | 31.2 § | 30.4 - 32.0 | 73.2                 | 67.4 - 79.1  | 90.5   | 89.6 - 91.5 | 69.3   | 67.2 - 71.3 | 49.4 § | 46.9 - 51.8 | 92.9     | 91.5 - 94.3  |
|                          | 2010-2014           | 34.0 § | 33.1 - 34.9 | 69.8                 | 63.4 - 76.1  | 90.2   | 89.3 - 91.2 | 71.5   | 69.3 - 73.6 | 50.3 § | 47.9 - 52.7 | 94.1     | 92.8 - 95.4  |
| Miyagi                   | 2000-2004           | 29.5   | 28.1 - 30.8 | 77.4                 | 69.5 - 85.2  | 88.5   | 86.6 - 90.4 | 66.2   | 61.9 - 70.6 | 38.3   | 34.3 - 42.2 | 89.3     | 87.1 - 91.5  |
|                          | 2005-2009           | 34.2   | 32.7 - 35.7 | 72.7                 | 60.5 - 84.9  | 91.0   | 89.2 - 92.8 | 69.2   | 64.5 - 73.9 | 45.6   | 40.9 - 50.2 | 92.6     | 90.5 - 94.6  |
|                          | 2010-2014           | 35.4   | 32.3 - 38.6 | 90.4                 | 79.3 - 100.0 | 90.3   | 86.9 - 93.7 | 83.3   | 75.1 - 91.5 | 49.8   | 41.1 - 58.4 | 93.9     | 89.5 - 98.4  |
| Niigata                  | 2000-2004           | 35.7 § | 34.3 - 37.2 | 69.8 §               | 60.6 - 79.0  | 88.2   | 86.3 - 90.1 | 73.9   | 70.2 - 77.6 | 50.7 § | 46.2 - 55.2 | 83.4 §   | 80.3 - 86.5  |
|                          | 2005-2009           | 36.2   | 34.9 - 37.6 | 69.6                 | 61.2 - 78.0  | 89.8   | 88.2 - 91.5 | 70.4   | 66.7 - 74.1 | 51.8   | 47.9 - 55.6 | 90.3     | 88.4 - 92.2  |
|                          | 2010-2014           | 37.7   | 36.3 - 39.1 | 76.8                 | 68.4 - 85.2  | 88.5   | 86.8 - 90.3 | 74.9   | 70.8 - 79.0 | 49.5   | 45.5 - 53.4 | 90.9     | 89.1 - 92.7  |
| Osaka                    | 2000-2004           | 21.3 § | 20.7 - 21.9 | 50.1                 | 42.4 - 57.8  | 82.6   | 81.4 - 83.8 | 64.9   | 62.7 - 67.0 | 32.9   | 30.6 - 35.1 | 79.1     | 76.9 - 81.3  |
|                          | 2005-2009           | 24.8   | 24.0 - 25.5 | 62.1                 | 54.9 - 69.3  | 86.0   | 84.9 - 87.1 | 66.7   | 64.6 - 68.8 | 40.5   | 38.3 - 42.8 | 88.1     | 86.2 - 89.9  |
|                          | 2010-2014           | -      | -           | -                    | -            | -      | -           | -      | -           | -      | -           | -        | -            |
| Saga                     | 2000-2004           | -      | -           | -                    | -            | -      | -           | -      | -           | -      | -           | -        | -            |
|                          | 2005-2009           | 31.8   | 29.2 - 34.4 | 62.9                 | 40.4 - 85.3  | 85.2   | 81.9 - 88.4 | 75.6   | 70.0 - 81.3 | 44.6   | 37.9 - 51.3 | 88.1     | 84.3 - 91.9  |
|                          | 2010-2014           | 33.4 § | 28.7 - 38.2 | 78.9                 | 50.0 - 100.0 | 86.3   | 76.4 - 96.1 | 72.2   | 65.0 - 79.4 | 27.5   | 19.2 - 35.9 | 91.8     | 86.0 - 97.6  |
| Tochigi                  | 2000-2004           | -      | -           | -                    | -            | -      | -           | -      | -           | -      | -           | -        | -            |
|                          | 2005-2009           | 26.7 § | 25.0 - 28.3 | 76.0                 | 66.9 - 85.1  | 87.4   | 85.2 - 89.6 | 72.2   | 68.3 - 76.2 | 38.0   | 33.7 - 42.3 | 95.1     | 92.7 - 97.5  |
|                          | 2010-2014           | 35.0 § | 32.0 - 38.0 | 87.1                 | 73.6 - 100.0 | 89.9   | 84.2 - 95.5 | 78.3   | 73.6 - 82.9 | 45.4   | 40.5 - 50.3 | 98.8     | 96.5 - 100.0 |
| Yamagata                 | 2000-2004           | 28.7   | 25.9 - 31.5 | 83.4                 | 63.4 - 100.0 | 86.3   | 82.1 - 90.5 | 65.9   | 57.7 - 74.1 | 38.5   | 30.8 - 46.2 | 91.6     | 87.0 - 96.2  |
|                          | 2005-2009           | 31.0   | 29.2 - 32.9 | 60.7                 | 45.1 - 76.4  | 88.7   | 86.5 - 90.8 | 64.1   | 58.4 - 69.8 | 45.5   | 40.7 - 50.2 | 90.9     | 88.2 - 93.7  |
|                          | 2010-2014           | 36.1   | 34.0 - 38.2 | 69.0                 | 57.0 - 81.1  | 89.9   | 87.6 - 92.1 | 65.7   | 60.0 - 71.5 | 42.3   | 37.5 - 47.1 | 90.9     | 88.3 - 93.5  |
| Yamanashi                | 2000-2004           | -      | -           | -                    | -            | -      | -           | -      | -           | -      | -           | -        | -            |
|                          | 2005-2009           | 29.4   | 25.6 - 33.2 | 85.3                 | 58.3 - 100.0 | 93.5   | 89.5 - 97.6 | 68.1   | 58.9 - 77.4 | 50.6   | 40.5 - 60.7 | 92.4     | 88.0 - 96.8  |
|                          | 2010-2014           | 28.6   | 24.7 - 32.5 | 82.9                 | 60.8 - 100.0 | 92.6   | 87.9 - 97.2 | 78.3   | 70.9 - 85.8 | 55.0   | 46.7 - 63.3 | 98.1     | 95.2 - 100.0 |
| Jordan *                 | 2000-2004           | 42.9 § | 38.3 - 47.4 | 68.5 §               | 56.4 - 80.6  | 87.6 § | 83.5 - 91.7 | 75.6 § | 66.8 - 84.3 | -      | -           | 88.5 §   | 83.7 - 93.3  |
|                          | 2005-2009           | 44.1 § | 39.4 - 48.7 | 63.1 §               | 49.3 - 76.9  | 86.6 § | 83.2 - 90.0 | 70.6 § | 63.9 - 77.4 | -      | -           | 88.6 §   | 83.3 - 93.9  |
|                          | 2010-2014           | 28.3 § | 24.9 - 31.6 | 55.9 §               | 41.5 - 70.4  | 84.4 § | 80.9 - 88.0 | 56.4 § | 48.2 - 64.6 | -      | -           | 86.1 §   | 81.1 - 91.0  |
| Korea *                  | 2000-2004           | 15.3   | 15.0 - 15.6 | 51.4                 | 48.3 - 54.4  | 79.5   | 78.0 - 81.0 | 76.0   | 75.3 - 76.7 | 43.0   | 41.2 - 44.7 | 76.0     | 74.6 - 77.5  |
|                          | 2005-2009           | 19.9   | 19.6 - 20.2 | 55.3                 | 52.8 - 57.7  | 84.0   | 83.0 - 85.0 | 77.0   | 76.4 - 77.7 | 44.1   | 42.7 - 45.5 | 87.3     | 86.5 - 88.1  |
|                          | 2010-2014           | 25.1   | 24.8 - 25.4 | 59.9                 | 57.5 - 62.2  | 86.6   | 85.8 - 87.5 | 77.3   | 76.6 - 78.0 | 47.5   | 46.2 - 48.9 | 89.9     | 89.2 - 90.5  |
| Kuwait *                 | 2000-2004           | 13.3   | 8.9 - 17.7  | -                    | -            | 68.3   | 58.0 - 78.7 | 54.8   | 45.2 - 64.3 | 38.9   | 26.3 - 51.5 | 78.8     | 66.7 - 90.9  |
|                          | 2005-2009           | 16.3   | 11.1 - 21.5 | -                    | -            | 71.0   | 63.8 - 78.2 | 73.8   | 61.7 - 86.0 | 35.4   | 25.2 - 45.6 | 71.9     | 63.7 - 80.0  |
|                          | 2010-2014           | 13.4   | 8.8 - 18.0  | -                    | -            | 75.2   | 66.4 - 83.9 | 56.6   | 44.2 - 69.0 | 35.1   | 25.6 - 44.7 | 84.0     | 74.1 - 94.0  |
| Malaysia (Penang)        | 2000-2004           | -      | -           | -                    | -            | -      | -           | -      | -           | -      | -           | -        | -            |
|                          | 2005-2009           | 6.8    | 4.9 - 8.7   | -                    | -            | 74.4 § | 66.3 - 82.4 | 56.3 § | 49.5 - 63.0 | 36.4 § | 27.3 - 45.6 | 74.9     | 67.5 - 82.3  |
|                          | 2010-2014           | 10.1   | 7.1 - 13.2  | -                    | -            | 65.0 § | 52.1 - 78.0 | 57.1 § | 48.3 - 65.9 | 46.8 § | 34.5 - 59.0 | 87.7     | 80.8 - 94.5  |
| Mongolia *               | 2000-2004           | -      | -           | -                    | -            | -      | -           | -      | -           | -      | -           | -        | -            |
|                          | 2005-2009           | -      | -           | -                    | -            | 76.7   | 60.0 - 93.4 | -      | -           | -      | -           | -        | -            |
|                          | 2010-2014           | -      | -           | -                    | -            | 76.1   | 63.8 - 88.4 | -      | -           | -      | -           | -        | -            |
| Qatar *                  | 2000-2004           | 7.4 §  | 0.8 - 14.1  | 77.5 §               | 48.0 - 100.0 | 59.2 § | 48.7 - 69.7 | 83.9 § | 68.5 - 99.2 | 47.1 § | 25.1 - 69.0 | 81.5 §   | 60.7 - 100.0 |
|                          | 2005-200            |        |             |                      |              |        |             |        |             |        |             |          |              |

**Web-table 4.2: Age-standardised five-year net survival (NS, %): adults (15-99 years) diagnosed with cancer of the lung, melanoma of the skin, cancer of the breast, ovary, cervix or prostate, by continent, country, registry and calendar period of diagnosis (2000-2004, 2005-2009, 2010-2014)**

|                          | Period of diagnosis | Lung   |             | Melanoma of the skin |             | Breast |             | Cervix |             | Ovary  |             | Prostate |             |
|--------------------------|---------------------|--------|-------------|----------------------|-------------|--------|-------------|--------|-------------|--------|-------------|----------|-------------|
|                          |                     | NS (%) | 95% CI      | NS (%)               | 95% CI      | NS (%) | 95% CI      | NS (%) | 95% CI      | NS (%) | 95% CI      | NS (%)   | 95% CI      |
| Khon Kaen                | 2000-2004           | 9.9    | 7.9 - 12.0  | 40.9 §               | 23.4 - 58.4 | 62.2   | 52.0 - 72.4 | 55.3   | 50.4 - 60.1 | 35.4 § | 22.6 - 48.2 | 46.6 §   | 32.9 - 60.3 |
|                          | 2005-2009           | 7.5    | 5.5 - 9.5   | 39.9                 | 22.3 - 57.5 | 70.4   | 63.0 - 77.8 | 56.4   | 51.9 - 60.9 | 38.9   | 30.5 - 47.3 | 58.3     | 47.6 - 69.1 |
|                          | 2010-2014           | 7.7    | 6.1 - 9.3   | 24.3                 | 12.9 - 35.8 | 66.2   | 60.0 - 72.4 | 54.4   | 49.9 - 58.9 | 43.5   | 34.4 - 52.7 | 59.8     | 49.2 - 70.3 |
| Lampang                  | 2000-2004           | 13.9   | 11.6 - 16.1 | 45.5                 | 26.2 - 64.7 | 67.3   | 56.9 - 77.8 | 59.4   | 53.9 - 64.9 | 62.0   | 50.4 - 73.6 | 66.3     | 54.6 - 78.0 |
|                          | 2005-2009           | 5.7    | 4.5 - 6.9   | 18.7                 | 0.4 - 36.9  | 73.7   | 66.1 - 81.3 | 59.5   | 54.3 - 64.6 | 37.7   | 27.2 - 48.2 | 45.3     | 36.0 - 54.6 |
|                          | 2010-2014           | 5.8    | 4.5 - 7.0   | 25.3                 | 5.9 - 44.8  | 72.1   | 65.2 - 78.9 | 59.5   | 53.8 - 65.3 | 32.2   | 24.7 - 39.7 | 50.1     | 39.9 - 60.3 |
| Lamphun                  | 2000-2004           | 13.9   | 10.3 - 17.6 | 54.0                 | 30.2 - 77.8 | 58.1   | 46.7 - 69.5 | 62.9   | 56.4 - 69.4 | 77.6   | 67.2 - 88.0 | 54.4     | 34.9 - 74.0 |
|                          | 2005-2009           | 13.6   | 11.1 - 16.1 | 24.3                 | 4.5 - 44.1  | 67.7   | 59.0 - 76.5 | 74.1   | 67.9 - 80.4 | 47.9   | 35.4 - 60.3 | 69.5     | 55.3 - 83.8 |
|                          | 2010-2014           | 10.9   | 8.8 - 13.0  | 55.5                 | 26.2 - 84.8 | 72.1   | 62.9 - 81.4 | 67.0   | 61.5 - 72.4 | 46.9   | 34.1 - 59.8 | 71.1     | 61.6 - 80.6 |
| Lopburi                  | 2000-2004           | 9.3    | 6.4 - 12.2  | 34.0 §               | 13.2 - 54.8 | 51.0 § | 42.0 - 59.9 | 50.3 § | 45.5 - 55.2 | 36.3 § | 26.1 - 46.5 | 55.9 §   | 41.7 - 70.1 |
|                          | 2005-2009           | 10.8   | 8.1 - 13.5  | 14.2                 | 1.6 - 26.7  | 67.0 § | 57.8 - 76.2 | 56.6 § | 51.4 - 61.8 | 32.3 § | 24.9 - 39.7 | 59.5 §   | 49.4 - 69.6 |
|                          | 2010-2014           | 10.4 § | 7.0 - 13.9  | 18.2 §               | 2.3 - 34.2  | 66.0 § | 55.6 - 76.4 | 49.8 § | 44.6 - 55.1 | 38.4 § | 25.1 - 51.7 | 55.9 §   | 45.1 - 66.7 |
| Songkhla                 | 2000-2004           | 5.3    | 3.5 - 7.1   | 33.6                 | 15.5 - 51.8 | 75.9   | 60.3 - 91.5 | 60.9   | 55.3 - 66.5 | 35.0   | 25.4 - 44.6 | 57.8     | 47.2 - 68.5 |
|                          | 2005-2009           | 9.9    | 7.8 - 12.0  | 26.8                 | 6.8 - 46.8  | 75.0   | 68.0 - 82.0 | 55.2   | 50.6 - 59.7 | 29.4   | 22.9 - 36.0 | 58.8     | 51.0 - 66.5 |
|                          | 2010-2014           | 11.5   | 9.4 - 13.6  | 16.0                 | 3.8 - 28.3  | 75.1   | 68.5 - 81.7 | 53.5   | 48.5 - 58.5 | 28.4   | 20.0 - 36.8 | 47.6     | 39.1 - 56.0 |
| Turkey<br>(9 registries) | 2000-2004           | 11.9 § | 10.6 - 13.3 | 60.9 §               | 53.2 - 68.6 | 84.8   | 81.5 - 88.0 | 64.8   | 59.7 - 69.9 | 46.1 § | 38.3 - 53.8 | 83.4 §   | 79.3 - 87.5 |
|                          | 2005-2009           | 12.7   | 12.2 - 13.2 | 57.7                 | 54.6 - 60.9 | 80.6   | 79.2 - 82.1 | 59.2   | 56.5 - 61.9 | 40.0   | 37.4 - 42.6 | 81.2     | 79.9 - 82.6 |
|                          | 2010-2014           | 14.9   | 14.3 - 15.4 | 60.7                 | 57.6 - 63.7 | 82.1   | 80.7 - 83.5 | 60.7   | 58.1 - 63.3 | 39.7   | 37.3 - 42.0 | 83.8     | 82.5 - 85.1 |
| Ankara                   | 2000-2004           | -      | -           | -                    | -           | -      | -           | -      | -           | -      | -           | -        | -           |
|                          | 2005-2009           | 18.6   | 17.1 - 20.1 | 55.8                 | 49.7 - 61.9 | 82.9   | 79.7 - 86.2 | 60.6   | 55.5 - 65.7 | 46.8   | 41.7 - 51.8 | 86.4     | 83.5 - 89.3 |
|                          | 2010-2014           | 21.5   | 19.9 - 23.2 | 65.4                 | 59.4 - 71.4 | 87.4   | 84.3 - 90.4 | 70.7   | 66.2 - 75.3 | 38.5   | 33.6 - 43.4 | 86.3     | 82.9 - 89.8 |
| Antalya                  | 2000-2004           | -      | -           | -                    | -           | -      | -           | -      | -           | -      | -           | -        | -           |
|                          | 2005-2009           | 10.7   | 9.1 - 12.3  | 56.0                 | 47.3 - 64.7 | 82.7   | 78.2 - 87.2 | 61.1   | 53.3 - 68.9 | 44.1   | 35.7 - 52.6 | 77.9     | 74.2 - 81.5 |
|                          | 2010-2014           | 11.8   | 9.1 - 14.4  | 66.0                 | 55.3 - 76.7 | 74.6   | 66.5 - 82.7 | 47.9   | 38.9 - 56.9 | 41.5   | 31.9 - 51.1 | 85.5     | 80.6 - 90.3 |
| Bursa                    | 2000-2004           | -      | -           | -                    | -           | -      | -           | -      | -           | -      | -           | -        | -           |
|                          | 2005-2009           | 9.8    | 8.7 - 11.0  | 47.9                 | 39.0 - 56.7 | 70.5   | 66.4 - 74.5 | 51.4   | 44.6 - 58.3 | 30.5   | 24.3 - 36.8 | 73.0     | 68.9 - 77.2 |
|                          | 2010-2014           | 9.9    | 7.8 - 12.0  | 66.2                 | 55.5 - 76.9 | 78.3   | 71.5 - 85.1 | 65.4   | 57.2 - 73.6 | 37.0   | 30.2 - 43.8 | 76.6     | 70.2 - 82.9 |
| Edirne                   | 2000-2004           | -      | -           | -                    | -           | -      | -           | -      | -           | -      | -           | -        | -           |
|                          | 2005-2009           | 8.2    | 5.8 - 10.6  | 25.6                 | 8.6 - 42.6  | 72.9   | 62.8 - 83.0 | 55.6   | 36.9 - 74.2 | 35.0   | 24.2 - 45.8 | 74.3     | 64.7 - 84.0 |
|                          | 2010-2014           | 11.6   | 8.5 - 14.8  | 52.1                 | 23.0 - 81.1 | 78.3   | 67.7 - 89.0 | 58.4   | 34.0 - 82.9 | 51.3   | 38.2 - 64.5 | 85.7     | 76.3 - 95.0 |
| Erzurum                  | 2000-2004           | -      | -           | -                    | -           | -      | -           | -      | -           | -      | -           | -        | -           |
|                          | 2005-2009           | 13.2   | 10.6 - 15.8 | 67.6                 | 51.3 - 83.9 | 63.4   | 54.6 - 72.3 | 55.9   | 40.7 - 71.1 | 30.7   | 18.6 - 42.8 | 65.0     | 57.3 - 72.7 |
|                          | 2010-2014           | 17.2   | 13.5 - 20.9 | 51.9                 | 22.5 - 81.2 | 58.0   | 46.4 - 69.6 | 58.7   | 39.3 - 78.1 | 20.8   | 12.6 - 29.0 | 76.3     | 66.4 - 86.1 |
| Eskisehir                | 2000-2004           | -      | -           | -                    | -           | -      | -           | -      | -           | -      | -           | -        | -           |
|                          | 2005-2009           | 11.8   | 9.1 - 14.5  | -                    | -           | 86.0   | 79.8 - 92.2 | 62.4   | 49.2 - 75.6 | 31.7   | 23.9 - 39.5 | 74.9     | 68.2 - 81.7 |
|                          | 2010-2014           | 13.3   | 10.6 - 16.0 | -                    | -           | 87.9   | 79.6 - 96.2 | 75.2   | 61.1 - 89.3 | 43.1   | 27.7 - 58.5 | 79.2     | 71.4 - 87.0 |
| Izmir                    | 2000-2004           | 11.9 § | 10.6 - 13.3 | 60.9 §               | 53.2 - 68.6 | 84.8   | 81.5 - 88.0 | 64.8   | 59.7 - 69.9 | 46.1 § | 38.3 - 53.8 | 83.4 §   | 79.3 - 87.5 |
|                          | 2005-2009           | 11.0   | 10.3 - 11.8 | 61.2                 | 55.6 - 66.7 | 82.6   | 80.4 - 84.8 | 60.0   | 55.5 - 64.4 | 39.1   | 34.4 - 43.7 | 84.8     | 82.6 - 87.0 |
|                          | 2010-2014           | 12.6   | 11.8 - 13.5 | 63.0                 | 57.3 - 68.8 | 84.2   | 81.8 - 86.6 | 58.7   | 53.6 - 63.7 | 38.5   | 33.6 - 43.3 | 87.5     | 85.1 - 89.9 |
| Samsun                   | 2000-2004           | -      | -           | -                    | -           | -      | -           | -      | -           | -      | -           | -        | -           |
|                          | 2005-2009           | 16.1   | 13.9 - 18.2 | 59.6                 | 48.9 - 70.2 | 75.1   | 69.5 - 80.7 | 61.7   | 51.3 - 72.1 | 41.0   | 31.6 - 50.3 | 78.2     | 73.4 - 82.9 |
|                          | 2010-2014           | 13.7   | 11.0 - 16.5 | 65.6                 | 51.4 - 79.8 | 84.1   | 76.3 - 91.9 | 61.7   | 49.3 - 74.2 | 61.4   | 49.7 - 73.1 | 79.1     | 71.9 - 86.4 |
| Trabzon                  | 2000-2004           | -      | -           | -                    | -           | -      | -           | -      | -           | -      | -           | -        | -           |
|                          | 2005-2009           | 13.8   | 11.5 - 16.2 | 65.0                 | 52.4 - 77.7 | 82.9   | 76.6 - 89.2 | 62.4   | 51.1 - 73.8 | 34.0   | 23.7 - 44.3 | 71.1     | 65.6 - 76.7 |
|                          | 2010-2014           | 16.0   | 12.3 - 19.7 | 51.2                 | 21.7 - 80.8 | 78.7   | 66.7 - 90.8 | 80.1   | 67.5 - 92.7 | 40.6   | 29.6 - 51.5 | 86.1     | 80.2 - 92.0 |
| EUROPE                   |                     |        |             |                      |             |        |             |        |             |        |             |          |             |
| Austria *                | 2000-2004           | 15.4   | 14.8 - 16.0 | 83.4                 | 82.2 - 84.7 | 81.7   | 80.9 - 82.4 | 65.4   | 63.4 - 67.4 | 40.9   | 39.4 - 42.5 | 90.1     | 89.3 - 90.8 |
|                          | 2005-2009           | 18.0   | 17.4 - 18.6 | 84.6                 | 83.5 - 85.8 | 83.9   | 83.2 - 84.6 | 66.0   | 63.7 - 68.2 | 41.2   | 39.6 - 42.8 | 90.8     | 90.1 - 91.5 |
|                          | 2010-2014           | 19.7   | 19.1 - 20.4 | 87.8                 | 86.7 - 88.8 | 84.8   | 84.1 - 85.5 | 63.9   | 61.6 - 66.2 | 41.0   | 39.4 - 42.7 | 90.2     | 89.5 - 90.9 |
| Belarus (Childhood) †    | 2000-2004           | -      | -           | -                    | -           | -      | -           | -      | -           | -      | -           | -        | -           |
|                          | 2005-2009           | -      | -           | -                    | -           | -      | -           | -      | -           | -      | -           | -        | -           |
|                          | 2010-2014           | -      | -           | -                    | -           | -      | -           | -      | -           | -      | -           | -        | -           |
| Belgium *                | 2000-2004           | 15.4   | 14.4 - 16.4 | 86.3                 | 83.9 - 88.7 | 84.8   | 83.5 - 86.0 | 65.1   | 61.1 - 69.0 | 42.7   | 39.4 - 45.9 | 92.1     | 90.8 - 93.4 |
|                          | 2005-2009           | 17.0   | 16.5 - 17.4 | 88.9                 | 87.9 - 89.8 | 85.3   | 84.7 - 85.8 | 65.7   | 63.8 - 67.6 | 42.8   | 41.3 - 44.3 | 93.2     | 92.6 - 93.7 |
|                          | 2010-2014           | 18.2   | 17.7 - 18.6 | 91.0                 | 90.1 - 91.8 | 86.4   | 85.9 - 86.9 | 65.4   | 63.5 - 67.2 | 43.1   | 41.6 - 44.6 | 93.8     | 93.2 - 94.3 |
| Bulgaria *               | 2000-2004           | 5.8    | 5.3 - 6.3   | 50.8                 | 47.9 - 53.8 | 70.9   | 69.7 - 72.1 | 49.2   | 47.6 - 50.7 | 32.9   | 30.9 - 34.9 | 49.4     | 47.1 - 51.7 |
|                          | 2005-2009           | 7.0    | 6.5 - 7.6   | 56.0                 | 53.3 - 58.6 | 75.9   | 74.8 - 77.0 | 53.2   | 51.7 - 54.7 | 33.9   | 32.2 - 35.5 | 54.8     | 52.7 - 56.9 |
|                          | 2010-2014           | 7.7    | 7.1 - 8.2   | 61.2                 | 58.8 - 63.7 | 78.3   | 77.2 - 79.4 | 54.8   | 53.3 - 56.3 | 37.3   | 35.4 - 39.1 | 68.3     | 66.2 - 70.5 |
| Croatia *                | 2000-2004           | 11.2   | 10.5 - 11.9 | 66.4                 | 64.0 - 68.8 | 73.6   | 72.2 - 75.0 | 63.2   | 60.6 - 65.8 | 36.9   | 34.6 - 39.2 | 65.7     | 63.6 - 67.9 |
|                          | 2005-2009           | 10.6   | 10.0 - 11.3 | 74.7                 | 72.7 - 76.7 | 78.2   | 77.0 - 79.4 | 64.3   | 61.9 - 66.7 | 33.4   | 31.3 - 35.5 | 78.3     | 76.7 - 79.9 |
|                          | 2010-2014           | 10.0   | 9.3 - 10.6  | 77.2                 | 75.3 - 79.1 | 78.6   | 77.4 - 79.7 | 63.2   | 60.8 - 65.6 | 36.0   | 33.9 - 38.2 | 80.9     | 79.3 - 82.4 |
| Czech Republic *         | 2000-2004           | 8.6    | 8.2 - 9.0   | 80.7                 | 79.5 - 81.8 | 75.7   | 74.8 - 76.5 | 60.4   | 58.9 - 61.9 | 34.3   | 33.0 - 35.5 | 71.0     | 69.9 - 72.2 |
|                          | 2005-2009           | 9.8    | 9.4 - 10.3  | 84.6                 | 83.7 - 85.6 | 79.1   | 78.4 - 79.9 | 62.7   | 61.2 - 64.1 | 35.3   | 34.0 - 36.5 | 81.5     | 80.7 - 82.3 |
|                          | 2010-2014           | 10.6   | 10.2 - 11.1 | 85.7                 | 84.8 - 86.6 | 81.4   | 80.7 - 82.1 | 61.0   | 59.5 - 62.4 | 36.5   | 35.2 - 37.8 | 85.3     | 84.6 - 86.0 |
| Denmark *                | 2000-2004           | 9.5    | 9.0 - 10.1  | 87.3                 | 86.0 - 88.5 | 80.3   | 79.4 - 81.2 | 63.0   | 60.6 - 65.4 | 33.1   | 31.4 - 34.8 | 63.6     | 62.1 - 65.1 |
|                          | 2005-2009           | 12.3   | 11.7 - 12.8 | 89.1                 | 88.1 - 90.0 | 84.0   | 83.2 - 84.8 | 66.7   | 64.3 - 69.1 | 37.4   | 35.7 - 39.2 | 82.5     | 81.6 - 83.4 |
|                          | 2010-2014           | 16.6   | 16.0 - 17.3 | 91.1                 | 90.2 - 91.9 | 86.1   | 85          |        |             |        |             |          |             |

**Web-table 4.2: Age-standardised five-year net survival (NS, %): adults (15-99 years) diagnosed with cancer of the lung, melanoma of the skin, cancer of the breast, ovary, cervix or prostate, by continent, country, registry and calendar period of diagnosis (2000-2004, 2005-2009, 2010-2014)**

|                                   | Period of diagnosis | Lung   |             | Melanoma of the skin |              | Breast |             | Cervix |             | Ovary  |             | Prostate |              |
|-----------------------------------|---------------------|--------|-------------|----------------------|--------------|--------|-------------|--------|-------------|--------|-------------|----------|--------------|
|                                   |                     | NS (%) | 95% CI      | NS (%)               | 95% CI       | NS (%) | 95% CI      | NS (%) | 95% CI      | NS (%) | 95% CI      | NS (%)   | 95% CI       |
| Burgundy Digestive                | 2000-2004           | -      | -           | -                    | -            | -      | -           | -      | -           | -      | -           | -        | -            |
|                                   | 2005-2009           | -      | -           | -                    | -            | -      | -           | -      | -           | -      | -           | -        | -            |
|                                   | 2010-2014           | -      | -           | -                    | -            | -      | -           | -      | -           | -      | -           | -        | -            |
| Calvados                          | 2000-2004           | 11.1   | 9.5 - 12.7  | -                    | -            | 84.6   | 82.3 - 86.9 | 61.4   | 53.4 - 69.3 | 38.2   | 32.3 - 44.0 | 88.6     | 85.8 - 91.4  |
|                                   | 2005-2009           | 13.8   | 12.1 - 15.5 | -                    | -            | 84.3   | 82.1 - 86.6 | 61.0   | 53.3 - 68.7 | 41.5   | 35.6 - 47.3 | 91.2     | 89.1 - 93.3  |
|                                   | 2010-2014           | 11.9   | 8.5 - 15.2  | -                    | -            | 82.9   | 78.2 - 87.7 | 66.5   | 55.8 - 77.2 | 39.1   | 27.4 - 50.7 | 92.3     | 88.0 - 96.5  |
| Calvados Digestive                | 2000-2004           | -      | -           | -                    | -            | -      | -           | -      | -           | -      | -           | -        | -            |
|                                   | 2005-2009           | -      | -           | -                    | -            | -      | -           | -      | -           | -      | -           | -        | -            |
|                                   | 2010-2014           | -      | -           | -                    | -            | -      | -           | -      | -           | -      | -           | -        | -            |
| Côte-d'Or Gynaecologic            | 2000-2004           | -      | -           | -                    | -            | 87.2   | 84.5 - 89.8 | 53.1   | 44.2 - 61.9 | 52.3   | 43.1 - 61.5 | -        | -            |
|                                   | 2005-2009           | -      | -           | -                    | -            | 87.0   | 84.3 - 89.7 | 67.9   | 58.3 - 77.4 | 43.5   | 34.8 - 52.2 | -        | -            |
|                                   | 2010-2014           | -      | -           | -                    | -            | 87.5   | 82.0 - 93.0 | 72.3 § | 55.3 - 89.3 | 49.0   | 34.1 - 63.9 | -        | -            |
| Côte-d'Or Haematopoietic          | 2000-2004           | -      | -           | -                    | -            | -      | -           | -      | -           | -      | -           | -        | -            |
|                                   | 2005-2009           | -      | -           | -                    | -            | -      | -           | -      | -           | -      | -           | -        | -            |
|                                   | 2010-2014           | -      | -           | -                    | -            | -      | -           | -      | -           | -      | -           | -        | -            |
| Doubs                             | 2000-2004           | 12.6   | 10.6 - 14.5 | 89.8                 | 85.0 - 94.5  | 86.5   | 83.7 - 89.3 | 65.2   | 56.6 - 73.7 | 40.3   | 33.2 - 47.5 | 90.4     | 87.9 - 92.8  |
|                                   | 2005-2009           | 15.2   | 13.0 - 17.3 | 91.6                 | 87.8 - 95.4  | 85.6   | 82.8 - 88.3 | 62.6   | 53.8 - 71.4 | 38.9   | 32.4 - 45.4 | 95.8     | 93.6 - 97.9  |
|                                   | 2010-2014           | 18.1   | 13.1 - 23.1 | 91.2                 | 85.1 - 97.4  | 84.3   | 78.2 - 90.3 | 40.1   | 34.8 - 45.3 | 27.2   | 15.5 - 39.0 | 92.2     | 88.2 - 96.3  |
| Finistère                         | 2000-2004           | -      | -           | -                    | -            | -      | -           | -      | -           | -      | -           | -        | -            |
|                                   | 2005-2009           | -      | -           | -                    | -            | -      | -           | -      | -           | -      | -           | -        | -            |
|                                   | 2010-2014           | -      | -           | -                    | -            | -      | -           | -      | -           | -      | -           | -        | -            |
| Gironde                           | 2000-2004           | -      | -           | -                    | -            | -      | -           | -      | -           | -      | -           | -        | -            |
|                                   | 2005-2009           | 13.8   | 12.2 - 15.5 | 88.8                 | 85.2 - 92.5  | 86.5   | 84.3 - 88.7 | 57.8   | 49.7 - 65.9 | 46.7   | 40.4 - 53.0 | 89.7     | 87.7 - 91.7  |
|                                   | 2010-2014           | 18.2   | 14.9 - 21.5 | 85.8 §               | 78.9 - 92.7  | 84.1   | 79.0 - 89.1 | 70.5   | 61.9 - 79.0 | 53.0   | 41.8 - 64.1 | 89.8     | 87.1 - 92.6  |
| Gironde CNS                       | 2000-2004           | -      | -           | -                    | -            | -      | -           | -      | -           | -      | -           | -        | -            |
|                                   | 2005-2009           | -      | -           | -                    | -            | -      | -           | -      | -           | -      | -           | -        | -            |
|                                   | 2010-2014           | -      | -           | -                    | -            | -      | -           | -      | -           | -      | -           | -        | -            |
| Gironde Haematopoietic            | 2000-2004           | -      | -           | -                    | -            | -      | -           | -      | -           | -      | -           | -        | -            |
|                                   | 2005-2009           | -      | -           | -                    | -            | -      | -           | -      | -           | -      | -           | -        | -            |
|                                   | 2010-2014           | -      | -           | -                    | -            | -      | -           | -      | -           | -      | -           | -        | -            |
| Haut-Rhin                         | 2000-2004           | 12.4   | 10.7 - 14.1 | 91.5                 | 87.7 - 95.2  | 86.2   | 83.9 - 88.6 | 62.2   | 54.7 - 69.7 | 44.4   | 38.7 - 50.1 | 89.4     | 86.9 - 91.8  |
|                                   | 2005-2009           | 15.3   | 13.4 - 17.2 | 94.2                 | 91.3 - 97.2  | 86.9   | 84.6 - 89.2 | 68.2   | 60.1 - 76.2 | 43.8   | 37.2 - 50.4 | 96.1     | 94.1 - 98.2  |
|                                   | 2010-2014           | 14.4   | 10.5 - 18.2 | 95.3                 | 90.4 - 100.0 | 85.9   | 81.4 - 90.3 | 79.6   | 68.1 - 91.1 | 53.3   | 41.7 - 65.0 | 96.5     | 92.6 - 100.0 |
| Haute-Vienne                      | 2000-2004           | -      | -           | -                    | -            | -      | -           | -      | -           | -      | -           | -        | -            |
|                                   | 2005-2009           | 14.9   | 9.6 - 20.1  | 95.0                 | 84.4 - 100.0 | 92.0   | 84.7 - 99.2 | 58.0   | 36.1 - 79.9 | 33.0   | 12.2 - 53.8 | 94.1     | 89.6 - 98.7  |
|                                   | 2010-2014           | -      | -           | -                    | -            | -      | -           | -      | -           | -      | -           | -        | -            |
| Hérault                           | 2000-2004           | 13.3   | 11.9 - 14.8 | 90.5                 | 86.6 - 94.5  | 89.2   | 87.3 - 91.0 | 63.6   | 57.7 - 69.5 | 39.1   | 33.8 - 44.4 | 91.6     | 89.8 - 93.4  |
|                                   | 2005-2009           | 18.6   | 17.1 - 20.2 | 89.2                 | 85.9 - 92.4  | 89.2   | 87.4 - 90.9 | 66.4   | 61.0 - 71.8 | 51.5   | 45.6 - 57.4 | 95.0     | 93.4 - 96.6  |
|                                   | 2010-2014           | 22.9   | 19.0 - 26.7 | 90.4                 | 84.1 - 96.8  | 89.7   | 86.1 - 93.2 | 68.8   | 56.6 - 81.0 | 55.4   | 43.5 - 67.4 | 96.8     | 93.2 - 100.0 |
| Isère                             | 2000-2004           | 16.4   | 14.8 - 17.9 | 89.4                 | 86.3 - 92.6  | 87.4   | 85.5 - 89.3 | 63.5   | 56.6 - 70.5 | 44.7   | 39.8 - 49.7 | 90.4     | 88.5 - 92.2  |
|                                   | 2005-2009           | 16.3   | 14.8 - 17.8 | 92.1                 | 89.6 - 94.6  | 87.3   | 85.5 - 89.1 | 62.0   | 55.8 - 68.2 | 43.3   | 38.7 - 47.9 | 94.8     | 93.3 - 96.3  |
|                                   | 2010-2014           | 20.1   | 16.5 - 23.7 | 91.7                 | 86.4 - 96.9  | 87.1   | 83.3 - 90.9 | 64.2   | 53.4 - 75.1 | 45.0   | 35.1 - 54.9 | 95.3     | 92.4 - 98.2  |
| Lille Metro                       | 2000-2004           | -      | -           | -                    | -            | -      | -           | -      | -           | -      | -           | -        | -            |
|                                   | 2005-2009           | 14.6   | 11.8 - 17.3 | 95.5                 | 90.3 - 100.0 | 89.2   | 85.8 - 92.6 | 59.1   | 49.4 - 68.7 | 30.8   | 22.7 - 39.0 | 95.6     | 91.9 - 99.2  |
|                                   | 2010-2014           | -      | -           | -                    | -            | -      | -           | -      | -           | -      | -           | -        | -            |
| Loire-Atlantique                  | 2000-2004           | 14.7   | 13.4 - 16.1 | 89.3                 | 87.0 - 91.6  | 87.6   | 86.2 - 89.1 | 59.3   | 53.5 - 65.0 | 41.4   | 37.4 - 45.5 | 89.7     | 88.3 - 91.1  |
|                                   | 2005-2009           | 16.1   | 14.7 - 17.4 | 89.9                 | 87.5 - 92.3  | 88.6   | 87.3 - 90.0 | 62.8   | 56.9 - 68.8 | 39.9   | 36.0 - 43.7 | 93.9     | 92.7 - 95.1  |
|                                   | 2010-2014           | 16.9   | 13.9 - 19.9 | 92.2                 | 88.0 - 96.5  | 88.6   | 85.8 - 91.3 | 61.0   | 48.3 - 73.6 | 41.4   | 33.6 - 49.1 | 94.2     | 91.6 - 96.8  |
| Manche                            | 2000-2004           | 11.3   | 9.4 - 13.3  | 88.2                 | 83.9 - 92.5  | 83.7   | 81.0 - 86.4 | 62.8   | 53.8 - 71.7 | 36.5   | 30.5 - 42.4 | 89.5     | 86.6 - 92.5  |
|                                   | 2005-2009           | 14.4   | 12.2 - 16.5 | 83.4                 | 78.5 - 88.2  | 85.8   | 83.1 - 88.5 | 67.7   | 59.3 - 76.1 | 33.7   | 28.1 - 39.2 | 92.6     | 90.4 - 94.7  |
|                                   | 2010-2014           | 15.3   | 10.6 - 19.9 | 79.7                 | 71.2 - 88.2  | 86.7   | 81.6 - 91.8 | 56.6   | 43.9 - 69.2 | 19.9   | 9.8 - 30.0  | 91.1     | 87.0 - 95.1  |
| Somme                             | 2000-2004           | 13.3   | 11.4 - 15.2 | -                    | -            | 83.4   | 80.7 - 86.0 | 59.8   | 51.6 - 68.1 | 32.0   | 26.3 - 37.6 | 85.8     | 83.1 - 88.6  |
|                                   | 2005-2009           | 15.2   | 13.2 - 17.2 | -                    | -            | 82.3   | 79.5 - 85.1 | 51.7   | 44.1 - 59.3 | 38.3   | 32.1 - 44.6 | 88.2     | 85.8 - 90.6  |
|                                   | 2010-2014           | 16.4   | 12.0 - 20.9 | -                    | -            | 80.5   | 75.0 - 85.9 | 47.2   | 33.5 - 60.9 | 36.1   | 23.5 - 48.8 | 85.5     | 80.0 - 90.9  |
| Tarn                              | 2000-2004           | 13.3   | 10.9 - 15.7 | 89.7                 | 84.9 - 94.6  | 84.4   | 81.1 - 87.7 | 66.4   | 57.3 - 75.5 | 46.6   | 38.4 - 54.7 | 90.3     | 87.8 - 92.7  |
|                                   | 2005-2009           | 15.1   | 12.6 - 17.6 | 88.6                 | 83.7 - 93.5  | 86.8   | 84.1 - 89.6 | 62.3   | 53.6 - 71.0 | 35.4   | 27.9 - 43.0 | 94.8     | 92.6 - 97.1  |
|                                   | 2010-2014           | 14.9   | 9.8 - 20.0  | 93.1                 | 84.2 - 100.0 | 86.2   | 80.3 - 92.1 | 78.1   | 64.4 - 91.8 | 44.0   | 34.4 - 53.6 | 89.7     | 84.7 - 94.6  |
| France Childhood Haematopoietic † | 2000-2004           | -      | -           | -                    | -            | -      | -           | -      | -           | -      | -           | -        | -            |
|                                   | 2005-2009           | -      | -           | -                    | -            | -      | -           | -      | -           | -      | -           | -        | -            |
|                                   | 2010-2014           | -      | -           | -                    | -            | -      | -           | -      | -           | -      | -           | -        | -            |
| France Childhood Solid †          | 2000-2004           | -      | -           | -                    | -            | -      | -           | -      | -           | -      | -           | -        | -            |
|                                   | 2005-2009           | -      | -           | -                    | -            | -      | -           | -      | -           | -      | -           | -        | -            |
|                                   | 2010-2014           | -      | -           | -                    | -            | -      | -           | -      | -           | -      | -           | -        | -            |
| Germany (10 registries)           | 2000-2004           | 14.9   | 14.3 - 15.4 | 91.0                 | 90.4 - 91.6  | 83.9   | 83.4 - 84.4 | 64.9   | 63.8 - 66.1 | 40.8   | 39.3 - 42.2 | 90.4     | 89.9 - 90.9  |
|                                   | 2005-2009           | 16.9   | 16.5 - 17.4 | 92.0                 | 91.5 - 92.6  | 85.6   | 85.2 - 85.9 | 65.7   | 64.6 - 66.8 | 40.6   | 39.6 - 41.6 | 91.8     | 91.3 - 92.2  |
|                                   | 2010-2014           | 18.3   | 17.9 - 18.8 | 93.1                 | 92.6 - 93.6  | 86.0   | 85.7 - 86.4 | 65.2   | 64.0 - 66.4 | 41.2   | 40.2 - 42.2 | 91.6     | 91.2 - 92.0  |
| Brandenburg                       | 2000-2004           | 14.3 § | 13.3 - 15.4 | 86.7                 | 84.3 - 89.1  | 84.2   | 82.7 - 85.7 | 62.8   | 59.4 - 66.3 | 41.8 § | 38.7 - 45.0 | 88.9     | 87.1 - 90.8  |
|                                   | 2005-2009           | 16.5   | 15.5 - 17.5 | 89.1                 | 87.0 - 91.2  | 86.0   | 84.7 - 87.3 | 63.6   | 60.0 - 67.2 | 41.6   | 38.6 - 44.6 | 93.3     | 91.7 - 94.8  |
|                                   | 2010-2014           | 18.6   | 17.5 - 19.6 | 89.8                 | 88.0 - 91.7  | 86.6   | 85.3 - 87.8 | 65.8   | 62.1 - 69.4 | 41.1   | 38.1 - 44.1 | 92.8     | 91.3 - 94.3  |
| Bremen                            | 2000-2004           | 16.8   | 15.1 - 18.5 | 87.4                 | 83.5 - 91.2  | 83.5   | 81.3 - 85.7 | 66.7   | 60.7 - 72.8 | 40.4   | 35.6 - 45.3 | 88.7     | 86.0 - 91.4  |
|                                   | 2005-2009           | 16.9   | 15.3 - 18.6 | 91.1                 | 88.0 - 94.2  | 84.4   | 82.1 - 86.8 | 67.7   | 60.2 - 75.3 | 36.5   | 31.8 - 41.3 | 89.2     | 86.5 - 91.8  |
|                                   | 2010-2014           | 15.4   | 13.6 - 17.2 | 95.1                 | 92.0 - 98.2  | 82.9   | 80.4 - 85.4 | 71.4   | 62.7 - 80.2 | 36.4   | 31.2 - 41.7 | 88.1     | 85.2 - 91.0  |
| Hamburg                           | 2000-2004           | 13.8   | 12.7 - 14.9 | 92.1                 | 90.1 - 94.1  | 82.7   | 81.2 - 84.3 | 58.1   | 53.5 - 62.7 | 39.4   | 35.9 - 42.9 | 90.8     | 89.0 - 92.6  |
|                                   | 2005-2009           | 15.4   | 14.3 - 16.5 | 92.1                 | 90.1 - 94.0  | 84.1   | 82.8 - 85.4 | 66.8   | 62.6 - 71.0 | 39.4   | 36.2 - 42.7 | 89.0     | 87.4 - 90.5  |
|                                   | 2010-2014           | 17.1   | 15.8 - 18.5 | 92.1                 | 90.0 - 94.2  | 84.8   | 83.4 - 86.3 | 67.2   | 62.5 - 71.8 | 41.5   | 37.8 - 45.3 |          |              |

**Web-table 4.2: Age-standardised five-year net survival (NS, %): adults (15-99 years) diagnosed with cancer of the lung, melanoma of the skin, cancer of the breast, ovary, cervix or prostate, by continent, country, registry and calendar period of diagnosis (2000-2004, 2005-2009, 2010-2014)**

|                             | Period of diagnosis | Lung   |             | Melanoma of the skin |              | Breast |             | Cervix |             | Ovary  |             | Prostate |             |
|-----------------------------|---------------------|--------|-------------|----------------------|--------------|--------|-------------|--------|-------------|--------|-------------|----------|-------------|
|                             |                     | NS (%) | 95% CI      | NS (%)               | 95% CI       | NS (%) | 95% CI      | NS (%) | 95% CI      | NS (%) | 95% CI      | NS (%)   | 95% CI      |
| Rhineland Palatinate        | 2000-2004           | 14.2 § | 13.3 - 15.0 | 92.2                 | 90.9 - 93.6  | 83.8   | 82.8 - 84.8 | 65.3   | 61.9 - 68.7 | 43.1 § | 40.5 - 45.6 | 90.4     | 89.1 - 91.6 |
|                             | 2005-2009           | 16.6 § | 15.7 - 17.5 | 94.3 §               | 93.2 - 95.4  | 83.1 § | 82.2 - 84.0 | 64.0   | 60.9 - 67.0 | 40.5 § | 38.1 - 42.9 | 91.2 §   | 90.2 - 92.3 |
|                             | 2010-2014           | 16.3 § | 15.3 - 17.2 | 93.9 §               | 92.8 - 95.0  | 81.8 § | 80.9 - 82.7 | 63.9 § | 60.6 - 67.2 | 37.9 § | 35.3 - 40.4 | 90.8 §   | 89.7 - 91.9 |
| Saarland                    | 2000-2004           | 16.7   | 15.2 - 18.1 | 91.7                 | 88.6 - 94.8  | 82.8   | 80.8 - 84.9 | 60.1   | 54.7 - 65.5 | 43.6   | 39.3 - 47.9 | 95.5     | 93.1 - 97.9 |
|                             | 2005-2009           | 18.9   | 17.4 - 20.5 | 87.9                 | 85.0 - 90.8  | 84.4   | 82.4 - 86.4 | 67.2   | 61.3 - 73.1 | 41.8   | 37.3 - 46.2 | 94.1     | 91.5 - 96.8 |
|                             | 2010-2014           | 16.9   | 15.0 - 18.7 | 89.7                 | 86.2 - 93.1  | 83.6   | 81.4 - 85.9 | 63.3   | 56.0 - 70.6 | 41.9   | 36.5 - 47.2 | 92.3     | 89.2 - 95.3 |
| Saxony                      | 2000-2004           | 15.1   | 14.2 - 15.9 | 88.7                 | 87.1 - 90.3  | 84.5   | 83.4 - 85.5 | 65.5   | 63.0 - 67.9 | 40.8   | 38.7 - 42.9 | 88.9     | 87.5 - 90.3 |
|                             | 2005-2009           | 17.3   | 16.4 - 18.1 | 90.4                 | 89.0 - 91.8  | 86.4   | 85.5 - 87.3 | 68.2   | 65.6 - 70.9 | 41.3   | 39.1 - 43.5 | 92.6     | 91.5 - 93.7 |
|                             | 2010-2014           | 19.1   | 18.2 - 20.1 | 92.1                 | 90.9 - 93.4  | 86.8   | 85.8 - 87.7 | 67.2   | 64.4 - 69.9 | 42.4   | 40.1 - 44.7 | 92.0     | 91.0 - 93.0 |
| Schleswig-Holstein          | 2000-2004           | 16.1 § | 15.1 - 17.0 | 93.6                 | 92.1 - 95.1  | 84.2   | 83.1 - 85.4 | 67.9   | 64.7 - 71.1 | 42.2 § | 39.6 - 44.8 | 90.3     | 89.0 - 91.6 |
|                             | 2005-2009           | 16.9 § | 16.0 - 17.9 | 93.9                 | 92.4 - 95.4  | 85.8   | 84.6 - 86.9 | 65.6   | 62.0 - 69.3 | 41.9 § | 39.1 - 44.8 | 92.2     | 90.9 - 93.5 |
|                             | 2010-2014           | 19.2 § | 17.8 - 20.5 | 93.8                 | 92.0 - 95.7  | 87.2   | 85.9 - 88.6 | 64.7   | 60.4 - 69.1 | 40.7 § | 37.1 - 44.3 | 93.9     | 92.3 - 95.5 |
| Thuringia                   | 2000-2004           | 16.9 § | 15.7 - 18.1 | 89.5                 | 87.3 - 91.7  | 84.7   | 83.3 - 86.1 | 67.4   | 64.0 - 70.8 | 44.5 § | 41.1 - 48.0 | 88.7     | 86.5 - 90.8 |
|                             | 2005-2009           | 18.2   | 17.1 - 19.3 | 91.9                 | 90.2 - 93.6  | 84.9   | 83.6 - 86.2 | 64.2   | 60.7 - 67.8 | 41.1   | 38.1 - 44.1 | 89.7     | 88.0 - 91.4 |
|                             | 2010-2014           | 19.8   | 18.6 - 21.0 | 93.0                 | 91.4 - 94.7  | 86.2   | 84.9 - 87.4 | 62.0   | 58.5 - 65.5 | 42.8   | 39.6 - 45.9 | 91.7     | 90.1 - 93.3 |
| Gibraltar *                 | 2000-2004           | 21.7 § | 0.0 - 44.9  | 65.4                 | 37.6 - 93.3  | 79.3 § | 66.5 - 92.1 | -      | -           | -      | -           | 62.5 §   | 31.5 - 93.5 |
|                             | 2005-2009           | 19.6 § | 8.0 - 31.1  | 100.0 §              | 88.5 - 100.0 | 72.1 § | 56.8 - 87.4 | -      | -           | -      | -           | 42.3 §   | 9.1 - 75.6  |
|                             | 2010-2014           | -      | -           | -                    | -            | -      | -           | -      | -           | -      | -           | -        | -           |
| Greek National Paediatric † | 2000-2004           | -      | -           | -                    | -            | -      | -           | -      | -           | -      | -           | -        | -           |
|                             | 2005-2009           | -      | -           | -                    | -            | -      | -           | -      | -           | -      | -           | -        | -           |
|                             | 2010-2014           | -      | -           | -                    | -            | -      | -           | -      | -           | -      | -           | -        | -           |
| Iceland *                   | 2000-2004           | 14.1   | 11.2 - 16.9 | 84.5                 | 77.7 - 91.3  | 87.4   | 82.9 - 91.8 | 81.8   | 72.8 - 90.8 | 39.6   | 30.9 - 48.3 | 80.1     | 75.5 - 84.7 |
|                             | 2005-2009           | 16.0   | 12.9 - 19.1 | 85.4                 | 79.5 - 91.3  | 85.8   | 81.4 - 90.2 | 87.6   | 79.5 - 95.7 | 40.9   | 31.3 - 50.5 | 89.7     | 86.5 - 92.9 |
|                             | 2010-2014           | 20.2   | 16.9 - 23.4 | 87.5                 | 82.1 - 92.9  | 89.1   | 85.1 - 93.1 | 80.1   | 71.2 - 89.1 | 40.3   | 31.2 - 49.4 | 90.8     | 87.7 - 93.9 |
| Ireland *                   | 2000-2004           | 10.1   | 9.3 - 10.9  | 85.5                 | 83.6 - 87.4  | 77.2   | 75.8 - 78.5 | 57.8   | 54.1 - 61.6 | 29.4   | 27.2 - 31.7 | 83.7     | 82.5 - 84.9 |
|                             | 2005-2009           | 13.5   | 12.7 - 14.3 | 86.6                 | 85.1 - 88.1  | 81.4   | 80.2 - 82.6 | 58.7   | 55.5 - 61.9 | 31.2   | 28.9 - 33.4 | 89.7     | 88.7 - 90.7 |
|                             | 2010-2014           | 17.5   | 16.5 - 18.5 | 89.2                 | 87.7 - 90.7  | 82.0   | 80.7 - 83.3 | 63.6   | 60.1 - 67.2 | 32.8   | 30.3 - 35.3 | 91.1     | 90.1 - 92.2 |
| Italy<br>(45 registries)    | 2000-2004           | 14.0   | 13.7 - 14.3 | 84.1                 | 83.3 - 84.8  | 84.2   | 83.8 - 84.5 | 67.3   | 66.0 - 68.7 | 37.7   | 36.8 - 38.6 | 87.2     | 86.7 - 87.7 |
|                             | 2005-2009           | 15.5   | 15.2 - 15.8 | 86.0                 | 85.5 - 86.6  | 85.9   | 85.5 - 86.2 | 67.7   | 66.5 - 68.9 | 39.3   | 38.5 - 40.1 | 89.6     | 89.2 - 90.0 |
|                             | 2010-2014           | 15.9   | 15.5 - 16.3 | 85.7                 | 85.0 - 86.5  | 86.0   | 85.5 - 86.4 | 66.8   | 65.1 - 68.5 | 39.4   | 38.3 - 40.5 | 89.5     | 89.0 - 89.9 |
| Alto Adige                  | 2000-2004           | 16.7   | 14.0 - 19.4 | 89.3                 | 85.6 - 93.1  | 84.8   | 82.0 - 87.7 | 69.2   | 61.3 - 77.1 | 42.4   | 35.7 - 49.0 | 90.0     | 87.4 - 92.6 |
|                             | 2005-2009           | 17.5   | 14.8 - 20.1 | 94.6                 | 91.8 - 97.5  | 85.7   | 82.9 - 88.5 | 71.9   | 64.1 - 79.8 | 40.7   | 34.3 - 47.1 | 89.0     | 86.4 - 91.5 |
|                             | 2010-2014           | 16.6   | 11.4 - 21.7 | 88.1                 | 81.4 - 94.9  | 85.4   | 77.4 - 93.5 | 78.8   | 71.3 - 86.3 | 37.6   | 25.4 - 49.8 | 93.6     | 87.6 - 99.6 |
| Barletta-Andria-Trani       | 2000-2004           | -      | -           | -                    | -            | -      | -           | -      | -           | -      | -           | -        | -           |
|                             | 2005-2009           | 16.2   | 13.0 - 19.4 | 73.8                 | 65.8 - 81.8  | 81.8   | 77.9 - 85.7 | 60.6   | 50.2 - 71.0 | 34.5   | 26.5 - 42.5 | 85.6     | 80.9 - 90.2 |
|                             | 2010-2014           | 9.8    | 6.5 - 13.1  | 81.5                 | 74.8 - 88.3  | 87.3   | 80.7 - 93.9 | 49.0   | 32.6 - 65.4 | 31.5   | 22.5 - 40.4 | 78.0     | 63.4 - 92.7 |
| Basilicata                  | 2000-2004           | -      | -           | -                    | -            | -      | -           | -      | -           | -      | -           | -        | -           |
|                             | 2005-2009           | 13.1   | 10.6 - 15.5 | 81.3                 | 74.8 - 87.9  | 81.9   | 78.7 - 85.1 | 58.6   | 49.6 - 67.5 | 33.5   | 27.2 - 39.8 | 87.2     | 84.6 - 89.8 |
|                             | 2010-2014           | 19.1   | 13.9 - 24.4 | 72.2                 | 58.8 - 85.6  | 89.0   | 83.0 - 95.0 | 58.6   | 36.5 - 80.6 | 28.2   | 15.0 - 41.4 | 91.2     | 86.1 - 96.2 |
| Bergamo                     | 2000-2004           | -      | -           | -                    | -            | -      | -           | -      | -           | -      | -           | -        | -           |
|                             | 2005-2009           | 16.7   | 14.7 - 18.6 | 86.9                 | 83.0 - 90.8  | 84.1   | 82.0 - 86.3 | 71.0   | 63.1 - 78.9 | 38.8   | 33.3 - 44.4 | 92.0     | 89.6 - 94.5 |
|                             | 2010-2014           | 18.0   | 15.8 - 20.3 | 83.8                 | 79.0 - 88.6  | 86.8   | 83.8 - 89.8 | 69.0   | 61.7 - 76.3 | 44.0   | 37.3 - 50.6 | 91.3     | 87.8 - 94.8 |
| Biella-Vercelli             | 2000-2004           | 6.6    | 4.8 - 8.4   | 84.4                 | 77.4 - 91.3  | 84.6   | 81.1 - 88.1 | 64.9   | 54.3 - 75.5 | 31.6   | 23.5 - 39.6 | 90.1     | 86.0 - 94.1 |
|                             | 2005-2009           | 11.4   | 9.1 - 13.7  | 88.1                 | 83.6 - 92.7  | 83.4   | 80.6 - 86.1 | 71.8   | 62.0 - 81.5 | 36.2   | 29.6 - 42.9 | 88.1     | 84.8 - 91.5 |
|                             | 2010-2014           | 9.2    | 6.1 - 12.4  | 88.1                 | 79.5 - 96.7  | 83.2   | 77.4 - 88.9 | 72.4   | 55.1 - 89.7 | 33.0   | 25.0 - 40.9 | 85.4     | 77.0 - 93.9 |
| Brescia                     | 2000-2004           | 16.6   | 15.1 - 18.1 | 88.1                 | 84.8 - 91.3  | 84.6   | 83.0 - 86.1 | 67.6   | 62.1 - 73.2 | 43.8   | 39.5 - 48.1 | 89.2     | 87.3 - 91.1 |
|                             | 2005-2009           | 17.2   | 15.5 - 18.9 | 84.7                 | 81.4 - 87.9  | 86.7   | 85.0 - 88.4 | 73.0   | 67.0 - 78.9 | 36.5   | 32.3 - 40.7 | 90.4     | 88.5 - 92.4 |
|                             | 2010-2014           | -      | -           | -                    | -            | -      | -           | -      | -           | -      | -           | -        | -           |
| Brindisi                    | 2000-2004           | -      | -           | -                    | -            | -      | -           | -      | -           | -      | -           | -        | -           |
|                             | 2005-2009           | 12.9   | 10.1 - 15.7 | 76.0                 | 68.1 - 83.9  | 80.6   | 76.9 - 84.4 | 63.8   | 48.6 - 78.9 | 34.7   | 26.5 - 42.9 | 87.8     | 84.3 - 91.3 |
|                             | 2010-2014           | -      | -           | -                    | -            | -      | -           | -      | -           | -      | -           | -        | -           |
| Caserta                     | 2000-2004           | -      | -           | -                    | -            | -      | -           | -      | -           | -      | -           | -        | -           |
|                             | 2005-2009           | 11.8   | 9.5 - 14.1  | 76.1                 | 68.2 - 84.1  | 82.3   | 77.7 - 86.9 | 66.3   | 55.9 - 76.7 | 31.2   | 23.6 - 38.8 | 85.3     | 79.8 - 90.7 |
|                             | 2010-2014           | 12.6   | 9.2 - 15.9  | 88.2                 | 79.6 - 96.9  | 88.0   | 82.3 - 93.7 | 66.4   | 44.8 - 88.0 | 50.8   | 39.0 - 62.7 | 88.6     | 83.2 - 94.1 |
| Catania-Messina-Enna        | 2000-2004           | 14.7   | 12.8 - 16.7 | 74.3                 | 68.5 - 80.1  | 83.9   | 81.4 - 86.5 | 69.0   | 61.0 - 77.0 | 39.1   | 33.7 - 44.6 | 87.7     | 84.6 - 90.8 |
|                             | 2005-2009           | 15.5   | 14.2 - 16.7 | 80.3                 | 77.2 - 83.5  | 83.8   | 82.3 - 85.3 | 68.4   | 63.3 - 73.6 | 38.0   | 34.6 - 41.3 | 89.9     | 88.2 - 91.7 |
|                             | 2010-2014           | 15.4   | 13.8 - 17.0 | 80.3                 | 76.3 - 84.2  | 82.5   | 80.6 - 84.4 | 71.9   | 65.2 - 78.5 | 34.7   | 30.7 - 38.7 | 89.7     | 87.4 - 92.0 |
| Catanzaro                   | 2000-2004           | 9.3    | 5.2 - 13.5  | 85.1                 | 71.0 - 99.1  | 75.4   | 69.0 - 81.9 | 73.5   | 52.9 - 94.2 | 35.1   | 20.5 - 49.7 | 78.4     | 71.9 - 84.9 |
|                             | 2005-2009           | 14.8   | 11.6 - 18.0 | 79.0                 | 72.0 - 86.0  | 84.9   | 81.1 - 88.8 | 68.3   | 57.7 - 79.0 | 36.4   | 27.4 - 45.4 | 89.3     | 85.1 - 93.6 |
|                             | 2010-2014           | -      | -           | -                    | -            | -      | -           | -      | -           | -      | -           | -        | -           |
| Como                        | 2000-2004           | 14.0   | 11.0 - 17.0 | 83.8                 | 77.5 - 90.1  | 81.9   | 78.2 - 85.6 | 69.1   | 55.3 - 82.9 | 38.2   | 30.1 - 46.2 | 89.1     | 84.9 - 93.3 |
|                             | 2005-2009           | 16.5   | 14.4 - 18.6 | 85.0                 | 81.5 - 88.6  | 86.1   | 83.9 - 88.3 | 66.3   | 58.3 - 74.4 | 41.3   | 35.5 - 47.2 | 88.3     | 85.8 - 90.8 |
|                             | 2010-2014           | 20.6   | 16.3 - 24.9 | 85.4                 | 79.9 - 90.9  | 87.7   | 84.3 - 91.0 | 69.0   | 57.4 - 80.6 | 38.5   | 29.9 - 47.1 | 88.2     | 83.9 - 92.5 |
| Cremona                     | 2000-2004           | -      | -           | -                    | -            | -      | -           | -      | -           | -      | -           | -        | -           |
|                             | 2005-2009           | 15.5   | 13.0 - 18.0 | 83.9                 | 77.5 - 90.4  | 83.7   | 80.6 - 86.8 | 70.8   | 59.7 - 81.9 | 44.2   | 35.9 - 52.6 | 92.5     | 89.3 - 95.7 |
|                             | 2010-2014           | 17.1   | 12.1 - 22.0 | 82.8                 | 70.3 - 95.3  | 84.4   |             |        |             |        |             |          |             |

**Web-table 4.2: Age-standardised five-year net survival (NS, %): adults (15-99 years) diagnosed with cancer of the lung, melanoma of the skin, cancer of the breast, ovary, cervix or prostate, by continent, country, registry and calendar period of diagnosis (2000-2004, 2005-2009, 2010-2014)**

|               | Period of diagnosis | Lung   |             | Melanoma of the skin |             | Breast |             | Cervix |             | Ovary  |             | Prostate |             |
|---------------|---------------------|--------|-------------|----------------------|-------------|--------|-------------|--------|-------------|--------|-------------|----------|-------------|
|               |                     | NS (%) | 95% CI      | NS (%)               | 95% CI      | NS (%) | 95% CI      | NS (%) | 95% CI      | NS (%) | 95% CI      | NS (%)   | 95% CI      |
| Mantova       | 2000-2004           | 16.7   | 13.9 - 19.5 | 85.5                 | 80.3 - 90.7 | 84.1   | 81.4 - 86.8 | 68.6   | 60.7 - 76.6 | 42.9   | 36.4 - 49.3 | 87.2     | 84.4 - 90.0 |
|               | 2005-2009           | 18.5   | 15.9 - 21.1 | 90.2                 | 86.2 - 94.1 | 87.6   | 85.3 - 89.9 | 59.7   | 47.5 - 72.0 | 39.3   | 33.0 - 45.6 | 88.0     | 85.5 - 90.6 |
|               | 2010-2014           | 13.8   | 9.8 - 17.8  | 87.7                 | 80.0 - 95.5 | 84.7   | 79.3 - 90.1 | 49.8   | 25.5 - 74.0 | 29.1   | 17.0 - 41.2 | 84.2     | 78.9 - 89.5 |
| Milano        | 2000-2004           | 15.1   | 13.9 - 16.3 | 85.3                 | 82.9 - 87.6 | 86.2   | 84.9 - 87.4 | 67.4   | 62.4 - 72.4 | 36.2   | 33.1 - 39.4 | 88.9     | 87.3 - 90.5 |
|               | 2005-2009           | 18.9   | 17.9 - 19.9 | 86.7                 | 85.0 - 88.4 | 86.8   | 85.8 - 87.8 | 69.1   | 65.2 - 73.1 | 40.8   | 38.1 - 43.5 | 91.5     | 90.4 - 92.7 |
|               | 2010-2014           | 20.1   | 18.7 - 21.6 | 87.7                 | 85.4 - 90.1 | 87.4   | 86.1 - 88.7 | 69.0   | 63.4 - 74.5 | 41.6   | 38.0 - 45.1 | 90.0     | 88.5 - 91.6 |
| Modena        | 2000-2004           | 14.0   | 12.1 - 15.8 | 78.7                 | 74.1 - 83.3 | 86.8   | 84.8 - 88.9 | 71.1   | 63.6 - 78.5 | 34.4   | 29.6 - 39.2 | 90.9     | 88.6 - 93.1 |
|               | 2005-2009           | 17.6   | 15.7 - 19.6 | 88.5                 | 85.2 - 91.9 | 89.0   | 87.0 - 91.0 | 74.4   | 66.6 - 82.2 | 38.5   | 33.2 - 43.7 | 90.9     | 88.9 - 92.9 |
|               | 2010-2014           | 17.7   | 15.2 - 20.1 | 91.4                 | 87.5 - 95.4 | 88.4   | 85.9 - 90.8 | 75.4   | 65.8 - 85.1 | 41.5   | 34.8 - 48.1 | 89.3     | 86.9 - 91.8 |
| Monza-Brianza | 2000-2004           | -      | -           | -                    | -           | -      | -           | -      | -           | -      | -           | -        | -           |
|               | 2005-2009           | 16.9   | 14.6 - 19.2 | 85.7                 | 81.6 - 89.8 | 86.4   | 84.2 - 88.6 | 68.8   | 60.9 - 76.7 | 36.0   | 29.8 - 42.2 | 89.8     | 86.9 - 92.6 |
|               | 2010-2014           | 19.6   | 16.5 - 22.8 | 83.6                 | 78.4 - 88.9 | 89.2   | 86.6 - 91.9 | 58.7   | 48.9 - 68.5 | 38.4   | 27.6 - 49.2 | 96.5     | 93.6 - 99.5 |
| Naples        | 2000-2004           | 13.2   | 11.1 - 15.2 | 64.8                 | 57.7 - 72.0 | 79.0   | 74.9 - 83.2 | 58.5   | 48.3 - 68.7 | 30.1   | 23.1 - 37.1 | 73.2     | 66.8 - 79.7 |
|               | 2005-2009           | 12.8   | 11.2 - 14.3 | 83.4                 | 78.0 - 88.8 | 82.5   | 79.7 - 85.2 | 60.1   | 51.4 - 68.9 | 41.1   | 34.1 - 48.1 | 83.3     | 80.1 - 86.4 |
|               | 2010-2014           | 10.9   | 9.2 - 12.6  | 81.7                 | 75.8 - 87.5 | 82.7   | 79.3 - 86.1 | 62.6   | 52.2 - 73.0 | 38.0   | 31.6 - 44.5 | 79.5     | 75.9 - 83.1 |
| Nuoro         | 2000-2004           | 9.9    | 5.7 - 14.1  | 49.1                 | 18.1 - 80.2 | 82.6   | 75.3 - 89.9 | -      | -           | 43.2   | 27.2 - 59.2 | 75.3     | 68.2 - 82.4 |
|               | 2005-2009           | 14.9   | 11.6 - 18.3 | 79.2                 | 70.0 - 88.5 | 82.9   | 78.7 - 87.1 | 57.2   | 37.1 - 77.2 | 35.7   | 27.3 - 44.0 | 77.6     | 71.5 - 83.6 |
|               | 2010-2014           | 14.4   | 10.3 - 18.4 | 75.0                 | 62.7 - 87.2 | 84.4   | 79.3 - 89.5 | 67.6   | 46.3 - 88.9 | 31.3   | 21.1 - 41.5 | 76.6     | 70.0 - 83.3 |
| Palermo       | 2000-2004           | 11.3   | 9.2 - 13.4  | 76.3                 | 68.7 - 83.8 | 83.1   | 79.9 - 86.3 | 56.1   | 47.4 - 64.7 | 32.9   | 26.6 - 39.3 | 79.4     | 75.0 - 83.7 |
|               | 2005-2009           | 12.3   | 10.9 - 13.7 | 79.0                 | 74.8 - 83.3 | 84.4   | 82.4 - 86.3 | 59.3   | 53.2 - 65.4 | 35.5   | 31.1 - 39.8 | 85.9     | 83.7 - 88.1 |
|               | 2010-2014           | 12.6   | 10.8 - 14.4 | 78.6                 | 73.4 - 83.8 | 83.5   | 81.0 - 86.0 | 62.0   | 53.2 - 70.8 | 37.0   | 31.2 - 42.9 | 88.3     | 85.8 - 90.9 |
| Parma         | 2000-2004           | 16.1   | 13.7 - 18.5 | 81.9                 | 76.7 - 87.2 | 85.3   | 82.7 - 87.9 | 74.6   | 66.6 - 82.6 | 38.5   | 32.7 - 44.3 | 87.2     | 84.2 - 90.2 |
|               | 2005-2009           | 14.4   | 12.1 - 16.8 | 89.9                 | 86.5 - 93.3 | 87.3   | 84.8 - 89.7 | 63.6   | 54.5 - 72.8 | 36.9   | 30.6 - 43.2 | 87.0     | 83.9 - 90.1 |
|               | 2010-2014           | 15.8   | 13.5 - 18.2 | 92.7                 | 89.5 - 95.9 | 85.8   | 83.5 - 88.2 | 60.0   | 49.7 - 70.2 | 40.5   | 34.3 - 46.7 | 89.0     | 86.2 - 91.8 |
| Pavia         | 2000-2004           | 17.9   | 14.7 - 21.2 | 75.5                 | 67.5 - 83.6 | 80.8   | 77.2 - 84.4 | 77.0   | 67.7 - 86.3 | 44.4   | 36.6 - 52.1 | 84.6     | 80.8 - 88.3 |
|               | 2005-2009           | 15.1   | 13.2 - 16.9 | 78.2                 | 73.4 - 83.0 | 86.6   | 84.5 - 88.7 | 66.5   | 59.1 - 73.9 | 44.3   | 38.3 - 50.3 | 87.5     | 85.0 - 90.0 |
|               | 2010-2014           | -      | -           | -                    | -           | -      | -           | -      | -           | -      | -           | -        | -           |
| Piacenza      | 2000-2004           | -      | -           | -                    | -           | -      | -           | -      | -           | -      | -           | -        | -           |
|               | 2005-2009           | 19.3   | 16.0 - 22.5 | 82.6                 | 75.7 - 89.4 | 87.7   | 84.3 - 91.1 | 54.5   | 36.9 - 72.1 | 43.4   | 32.9 - 53.9 | 86.5     | 83.3 - 89.7 |
|               | 2010-2014           | 17.3   | 13.1 - 21.6 | 90.4                 | 82.6 - 98.1 | 93.6   | 89.0 - 98.3 | 59.2   | 32.1 - 86.2 | 66.2   | 52.9 - 79.5 | 92.4     | 87.6 - 97.1 |
| Ragusa        | 2000-2004           | 12.7   | 9.8 - 15.7  | 76.1                 | 68.4 - 83.8 | 81.4   | 77.3 - 85.5 | 72.6   | 63.1 - 82.2 | 34.5   | 26.8 - 42.3 | 81.1     | 76.9 - 85.3 |
|               | 2005-2009           | 13.9   | 11.5 - 16.4 | 79.4                 | 73.3 - 85.5 | 80.1   | 76.9 - 83.3 | 64.3   | 54.4 - 74.3 | 37.7   | 31.3 - 44.1 | 85.3     | 81.9 - 88.6 |
|               | 2010-2014           | 14.4   | 11.4 - 17.5 | 79.6                 | 71.9 - 87.3 | 78.8   | 75.2 - 82.5 | 63.9   | 52.5 - 75.3 | 31.9   | 25.4 - 38.5 | 83.8     | 80.2 - 87.4 |
| Reggio Emilia | 2000-2004           | 14.0   | 12.0 - 16.0 | 83.1                 | 77.6 - 88.6 | 85.3   | 82.9 - 87.7 | 69.6   | 61.1 - 78.0 | 33.6   | 27.4 - 39.7 | 87.1     | 84.1 - 90.1 |
|               | 2005-2009           | 16.3   | 14.1 - 18.5 | 89.5                 | 85.7 - 93.3 | 87.9   | 85.7 - 90.2 | 69.6   | 58.4 - 80.9 | 42.6   | 36.6 - 48.6 | 90.7     | 88.5 - 93.0 |
|               | 2010-2014           | 18.8   | 15.8 - 21.9 | 86.4                 | 81.6 - 91.2 | 88.1   | 85.3 - 90.8 | 68.4   | 54.4 - 82.4 | 43.3   | 35.0 - 51.5 | 90.5     | 87.5 - 93.5 |
| Romagna       | 2000-2004           | 14.7   | 13.3 - 16.0 | 86.5                 | 83.6 - 89.4 | 86.4   | 84.7 - 88.0 | 67.6   | 61.7 - 73.5 | 35.7   | 31.8 - 39.5 | 87.9     | 85.8 - 89.9 |
|               | 2005-2009           | 18.6   | 17.2 - 20.1 | 89.0                 | 86.8 - 91.2 | 88.7   | 87.1 - 90.2 | 74.9   | 69.5 - 80.3 | 35.6   | 31.8 - 39.4 | 89.2     | 87.5 - 90.9 |
|               | 2010-2014           | 20.7   | 18.8 - 22.6 | 89.1                 | 86.5 - 91.8 | 88.5   | 86.6 - 90.4 | 70.6   | 63.3 - 78.0 | 36.7   | 31.9 - 41.6 | 90.7     | 89.0 - 92.4 |
| Salerno       | 2000-2004           | 11.5   | 10.1 - 12.8 | 75.6                 | 70.7 - 80.6 | 76.3   | 73.9 - 78.7 | 59.4   | 53.0 - 65.9 | 31.9   | 27.5 - 36.2 | 76.5     | 72.8 - 80.2 |
|               | 2005-2009           | 12.9   | 11.3 - 14.4 | 76.9                 | 72.7 - 81.1 | 82.3   | 80.2 - 84.4 | 69.0   | 61.8 - 76.3 | 36.4   | 31.8 - 41.0 | 88.1     | 85.9 - 90.2 |
|               | 2010-2014           | -      | -           | -                    | -           | -      | -           | -      | -           | -      | -           | -        | -           |
| Sassari       | 2000-2004           | 11.2   | 9.0 - 13.4  | 78.4                 | 70.3 - 86.5 | 83.7   | 80.8 - 86.7 | 71.2   | 61.6 - 80.8 | 36.2   | 29.2 - 43.2 | 77.4     | 73.1 - 81.8 |
|               | 2005-2009           | 12.7   | 10.6 - 14.9 | 77.5                 | 71.0 - 83.9 | 85.2   | 82.4 - 87.9 | 60.8   | 51.5 - 70.2 | 45.8   | 38.2 - 53.4 | 83.0     | 79.4 - 86.6 |
|               | 2010-2014           | 13.7   | 10.2 - 17.3 | 82.2                 | 72.2 - 92.2 | 86.0   | 81.9 - 90.1 | 52.0   | 40.4 - 63.7 | 40.5   | 29.8 - 51.3 | 81.7     | 76.2 - 87.2 |
| Siracusa      | 2000-2004           | 10.2   | 8.1 - 12.3  | 79.1                 | 71.7 - 86.6 | 79.1   | 75.5 - 82.8 | 62.1   | 51.9 - 72.3 | 34.4   | 26.6 - 42.2 | 73.7     | 67.4 - 80.0 |
|               | 2005-2009           | 13.6   | 11.1 - 16.1 | 81.2                 | 75.0 - 87.4 | 83.9   | 80.4 - 87.3 | 57.5   | 48.0 - 67.0 | 38.1   | 31.1 - 45.0 | 82.0     | 78.0 - 86.0 |
|               | 2010-2014           | 13.7   | 10.5 - 16.9 | 79.7                 | 70.9 - 88.5 | 84.3   | 80.0 - 88.6 | 56.9   | 42.2 - 71.6 | 34.9   | 25.9 - 43.9 | 83.3     | 78.3 - 88.4 |
| Sondrio       | 2000-2004           | 15.9   | 12.9 - 18.9 | 78.4                 | 70.3 - 86.6 | 88.4   | 84.0 - 92.7 | 58.7   | 43.4 - 74.1 | 34.6   | 26.4 - 42.8 | 88.9     | 84.5 - 93.4 |
|               | 2005-2009           | 16.9   | 13.9 - 19.9 | 81.4                 | 74.3 - 88.5 | 82.5   | 78.3 - 86.6 | 54.4   | 38.3 - 70.4 | 48.2   | 38.1 - 58.3 | 90.3     | 86.8 - 93.9 |
|               | 2010-2014           | 15.8   | 11.4 - 20.2 | 75.5                 | 63.7 - 87.2 | 81.2   | 74.4 - 87.9 | 59.8   | 42.3 - 77.3 | 34.1   | 22.4 - 45.8 | 89.6     | 84.4 - 94.8 |
| Taranto       | 2000-2004           | -      | -           | -                    | -           | -      | -           | -      | -           | -      | -           | -        | -           |
|               | 2005-2009           | 11.4   | 9.4 - 13.4  | 88.0                 | 83.0 - 93.0 | 85.1   | 82.0 - 88.1 | 56.5   | 46.6 - 66.5 | 36.0   | 29.9 - 42.1 | 87.7     | 84.0 - 91.4 |
|               | 2010-2014           | 15.7   | 12.1 - 19.3 | 76.9                 | 67.7 - 86.2 | 87.7   | 83.4 - 92.0 | 63.6   | 48.3 - 78.9 | 33.4   | 24.7 - 42.2 | 92.2     | 86.4 - 97.9 |
| Trapani       | 2000-2004           | 7.7    | 5.4 - 10.0  | 72.9                 | 64.2 - 81.7 | 78.7   | 74.3 - 83.1 | 57.9   | 42.6 - 73.1 | 41.3   | 32.7 - 49.9 | 82.5     | 77.8 - 87.2 |
|               | 2005-2009           | 11.0   | 8.8 - 13.2  | 80.8                 | 75.1 - 86.4 | 83.0   | 79.6 - 86.3 | 65.3   | 54.9 - 75.7 | 31.9   | 24.9 - 38.8 | 85.5     | 82.3 - 88.6 |
|               | 2010-2014           | 10.0   | 5.8 - 14.3  | 85.0                 | 74.2 - 95.8 | 86.5   | 79.5 - 93.5 | 68.2   | 55.1 - 81.3 | 34.0   | 19.9 - 48.0 | 83.3     | 77.7 - 88.9 |
| Trento        | 2000-2004           | 12.8   | 10.6 - 15.1 | 87.6                 | 82.7 - 92.5 | 86.1   | 83.8 - 88.5 | 65.9   | 56.8 - 74.9 | 37.3   | 31.8 - 42.9 | 83.0     | 79.7 - 86.3 |
|               | 2005-2009           | 13.9   | 11.5 - 16.3 | 82.8                 | 78.0 - 87.6 | 86.8   | 84.6 - 89.1 | 70.0   | 61.2 - 78.8 | 41.6   | 35.3 - 47.9 | 88.2     | 85.0 - 91.3 |
|               | 2010-2014           | 15.9   | 11.5 - 20.3 | 86.9                 | 80.0 - 93.8 | 88.8   | 83.7 - 93.9 | 73.0   | 67.9 - 78.2 | 46.5   | 33.7 - 59.4 | 86.3     | 80.8 - 91.8 |
| Turin         | 2000-2004           | 11.5   | 10.2 - 12.8 | 86.5                 | 83.5 - 89.5 | 84.2   | 82.5 - 86.0 | 62.8   | 56.1 - 69.4 | 32.4   | 28.5 - 36.2 | 89.5     | 87.4 - 91.6 |
|               | 2005-2009           | 15.2   | 13.7 - 16.6 | 88.5                 | 85.6 - 91.3 | 88.4   | 86.9 - 90.0 | 68.3   | 61.5 - 75.0 | 39.9   | 35.9 - 44.0 | 91.2     | 89.1 - 93.3 |
|               | 2010-2014           | 16.6   | 14.5 - 18.8 | 90.1                 | 86.7 - 93.5 | 89.0   | 87.1 - 91.0 | 65.3   | 57.0 - 73.7 | 35.7   | 30.7 - 40.7 | 90.7     | 88.2 - 93.2 |
| Tuscany       | 2000-2004           | 15.4   | 14.0 - 16.7 | 86.0                 | 83.4 - 88.5 | 85.1   | 83.6 - 86.6 | 67.8   | 62.4 - 73.2 | 44.4   | 40.4 - 48.4 | 84.3     | 82.0 - 86.5 |
|               | 2005-2009           | 15.9   | 14.6 - 17.3 | 87.7                 | 85.5 - 89.8 | 87.4   | 85.9 - 88.9 | 64.0   | 58.6 - 69.4 | 41.9   | 37.8 - 46.0 | 89.6     | 87.8 - 91.4 |
|               | 2010-2014           | -      | -           | -                    | -           | -      | -           | -      | -           | -      | -           | -        | -           |
| Umbria        | 2000-2004           | 16.4   | 14.7 - 18.1 | 79.8                 | 75.8 - 83.7 | 86.2   | 84.4 - 88.1 | 73.7   | 67.2 - 80.2 | 36.7   | 32.4 - 41.0 | 88.5     | 86.0 - 91.0 |
|               | 2005-2009           | 15.6   | 13.9 - 17.3 | 84.2                 | 80.9 - 87.5 | 84.9   | 83.1 - 86.6 | 72.9   | 66.5 - 79.4 | 43.5   | 38.7 - 48.2 | 90.9     | 88.9 - 92.9 |
|               | 2010-2014           | 17.6   | 15.6 - 19.6 | 86.5                 | 83.1 - 89.9 | 86.2   | 84.3 - 88.1 | 73.2   | 66.7 - 79.7 | 44.5   | 39.3 - 49.6 | 90.7     | 88.8 - 92.5 |
| Varese        | 2000-2004           | 12.9   | 11.4 - 14.4 | 81.5                 | 77.8 - 85.1 | 83.7   | 81.8 - 85.5 | 65.2   | 58.0 - 72.5 | 41.9   | 37.1 - 46.7 | 90.1     | 88.3 - 91.9 |
|               | 2005-2009           | 15.0   | 13.4 - 16.7 | 86.4                 | 83.5 - 89.3 | 85.3   | 83.5 - 87.1 | 71.6   | 64.9 - 78.3 | 40.3   | 36.0 - 44.6 | 92.2     | 90.5 - 93.9 |

**Web-table 4.2: Age-standardised five-year net survival (NS, %): adults (15-99 years) diagnosed with cancer of the lung, melanoma of the skin, cancer of the breast, ovary, cervix or prostate, by continent, country, registry and calendar period of diagnosis (2000-2004, 2005-2009, 2010-2014)**

|                              | Period of diagnosis | Lung   |             | Melanoma of the skin |             | Breast |             | Cervix |             | Ovary  |             | Prostate |             |
|------------------------------|---------------------|--------|-------------|----------------------|-------------|--------|-------------|--------|-------------|--------|-------------|----------|-------------|
|                              |                     | NS (%) | 95% CI      | NS (%)               | 95% CI      | NS (%) | 95% CI      | NS (%) | 95% CI      | NS (%) | 95% CI      | NS (%)   | 95% CI      |
| Latvia *                     | 2000-2004           | 17.3   | 15.3 - 19.3 | 66.3                 | 62.0 - 70.6 | 79.7   | 77.1 - 82.2 | 52.8   | 49.0 - 56.6 | 40.3   | 36.6 - 44.0 | 69.9     | 66.5 - 73.3 |
|                              | 2005-2009           | 19.5   | 17.7 - 21.2 | 65.1                 | 61.1 - 69.1 | 79.9   | 77.8 - 82.1 | 57.7   | 54.2 - 61.2 | 39.8   | 36.5 - 43.1 | 88.8     | 86.0 - 91.6 |
|                              | 2010-2014           | 20.4   | 18.7 - 22.1 | 72.1                 | 68.3 - 75.8 | 82.2   | 80.3 - 84.2 | 56.0   | 52.6 - 59.5 | 45.5   | 41.9 - 49.0 | 90.4     | 87.6 - 93.2 |
| Lithuania *                  | 2000-2004           | 8.8    | 8.0 - 9.6   | 67.2                 | 63.9 - 70.6 | 64.6   | 62.9 - 66.4 | 53.8   | 51.6 - 56.0 | 30.2   | 28.1 - 32.3 | 75.8     | 73.7 - 77.9 |
|                              | 2005-2009           | 8.8    | 8.0 - 9.7   | 70.6                 | 67.6 - 73.7 | 71.3   | 69.6 - 73.1 | 59.1   | 56.9 - 61.3 | 31.6   | 29.5 - 33.8 | 93.8     | 92.6 - 95.1 |
|                              | 2010-2014           | 9.9    | 8.7 - 11.0  | 75.3                 | 71.8 - 78.9 | 73.5   | 71.3 - 75.7 | 59.2   | 56.4 - 62.0 | 35.0   | 32.0 - 37.9 | 94.3     | 92.7 - 95.8 |
| Malta *                      | 2000-2004           | 9.2    | 6.5 - 12.0  | 87.3                 | 80.0 - 94.7 | 79.7   | 75.6 - 83.8 | 46.4   | 30.8 - 62.0 | 39.6   | 31.6 - 47.5 | 81.9     | 76.6 - 87.2 |
|                              | 2005-2009           | 11.4   | 8.7 - 14.1  | 81.6                 | 75.2 - 88.1 | 84.8   | 81.3 - 88.2 | 65.1   | 51.4 - 78.9 | 27.5   | 22.0 - 33.0 | 86.4     | 81.9 - 91.0 |
|                              | 2010-2014           | 14.9   | 11.5 - 18.2 | 81.9                 | 75.6 - 88.3 | 86.9   | 83.1 - 90.6 | 57.4   | 46.8 - 68.1 | 28.0   | 21.4 - 34.6 | 88.2     | 83.9 - 92.5 |
| Netherlands *                | 2000-2004           | 12.4   | 12.1 - 12.7 | 88.4                 | 87.6 - 89.2 | 83.9   | 83.4 - 84.4 | 66.1   | 64.1 - 68.0 | 36.3   | 35.1 - 37.6 | 83.4     | 82.7 - 84.1 |
|                              | 2005-2009           | 15.7   | 15.3 - 16.0 | 89.8                 | 89.1 - 90.4 | 85.8   | 85.3 - 86.3 | 65.5   | 63.6 - 67.3 | 37.2   | 36.0 - 38.5 | 87.5     | 86.9 - 88.1 |
|                              | 2010-2014           | 17.3   | 16.9 - 17.6 | 91.0                 | 90.4 - 91.6 | 86.6   | 86.1 - 87.1 | 67.5   | 65.6 - 69.3 | 37.5   | 36.2 - 38.7 | 88.5     | 87.9 - 89.0 |
| Norway *                     | 2000-2004           | 12.3   | 11.5 - 13.1 | 86.4                 | 85.1 - 87.6 | 84.7   | 83.7 - 85.8 | 70.9   | 68.0 - 73.7 | 41.4   | 39.3 - 43.6 | 83.8     | 82.8 - 84.9 |
|                              | 2005-2009           | 15.9   | 15.1 - 16.8 | 87.3                 | 86.2 - 88.3 | 87.2   | 86.1 - 88.3 | 70.7   | 67.8 - 73.6 | 42.8   | 40.7 - 45.0 | 90.3     | 89.5 - 91.1 |
|                              | 2010-2014           | 19.0   | 18.1 - 19.8 | 89.3                 | 88.3 - 90.3 | 87.7   | 86.6 - 88.8 | 73.3   | 70.3 - 76.3 | 45.5   | 43.3 - 47.7 | 92.9     | 92.2 - 93.7 |
| Poland *<br>(16 registries)  | 2000-2004           | 12.1   | 11.8 - 12.4 | 63.2                 | 62.0 - 64.4 | 71.3   | 70.7 - 71.9 | 51.6   | 50.8 - 52.5 | 32.7   | 31.9 - 33.6 | 68.8     | 67.9 - 69.7 |
|                              | 2005-2009           | 14.1   | 13.8 - 14.4 | 67.1                 | 66.2 - 68.1 | 74.7   | 74.2 - 75.2 | 54.4   | 53.6 - 55.3 | 35.4   | 34.6 - 36.2 | 75.0     | 74.4 - 75.7 |
|                              | 2010-2014           | 14.4   | 14.1 - 14.7 | 69.8                 | 68.9 - 70.7 | 76.5   | 76.1 - 77.0 | 55.1   | 54.2 - 55.9 | 37.5   | 36.7 - 38.3 | 78.1     | 77.5 - 78.7 |
| Greater Poland               | 2000-2004           | 9.5    | 8.7 - 10.3  | 66.5                 | 62.6 - 70.3 | 73.0   | 71.1 - 75.0 | 50.0   | 47.0 - 53.0 | 33.1   | 29.9 - 36.3 | 67.1     | 64.2 - 70.0 |
|                              | 2005-2009           | 13.0   | 12.1 - 13.9 | 69.4                 | 66.3 - 72.6 | 75.6   | 74.0 - 77.3 | 56.8   | 53.7 - 59.9 | 34.6   | 31.8 - 37.5 | 77.8     | 75.7 - 79.9 |
|                              | 2010-2014           | 12.5   | 11.6 - 13.4 | 69.0                 | 66.0 - 72.0 | 77.4   | 75.7 - 79.0 | 56.4   | 53.4 - 59.4 | 34.6   | 32.0 - 37.3 | 77.9     | 75.9 - 80.0 |
| Holy Cross                   | 2000-2004           | 12.5   | 11.2 - 13.8 | 60.6                 | 55.2 - 66.0 | 66.9   | 64.0 - 69.9 | 55.2   | 51.0 - 59.4 | 36.0   | 31.4 - 40.5 | 63.6     | 60.0 - 67.2 |
|                              | 2005-2009           | 11.1   | 9.9 - 12.4  | 66.7                 | 61.5 - 71.8 | 70.1   | 67.2 - 73.1 | 56.6   | 52.0 - 61.2 | 39.2   | 34.5 - 43.9 | 68.8     | 65.1 - 72.5 |
|                              | 2010-2014           | 12.0   | 10.6 - 13.3 | 68.4                 | 63.7 - 73.2 | 72.1   | 69.3 - 75.0 | 48.9   | 43.9 - 53.9 | 43.0   | 38.2 - 47.8 | 73.5     | 69.9 - 77.0 |
| Kuiavia-Pomerania            | 2000-2004           | 11.8   | 10.7 - 12.8 | 64.5                 | 59.3 - 69.6 | 73.2   | 70.5 - 75.9 | 49.3   | 45.6 - 52.9 | 36.0   | 31.9 - 40.1 | 74.7     | 70.9 - 78.6 |
|                              | 2005-2009           | 13.7   | 12.7 - 14.7 | 66.9                 | 62.4 - 71.5 | 74.8   | 72.7 - 77.0 | 53.4   | 49.8 - 57.0 | 35.3   | 32.0 - 38.6 | 73.4     | 70.6 - 76.2 |
|                              | 2010-2014           | 15.1   | 13.9 - 16.2 | 69.5                 | 65.3 - 73.7 | 77.7   | 75.6 - 79.7 | 55.2   | 51.4 - 58.9 | 35.6   | 32.4 - 38.7 | 75.0     | 72.4 - 77.7 |
| Lesser Poland                | 2000-2004           | 13.5   | 12.6 - 14.4 | 64.1                 | 60.8 - 67.4 | 67.4   | 65.4 - 69.3 | 54.7   | 51.8 - 57.5 | 34.2   | 31.6 - 36.9 | 67.0     | 64.3 - 69.7 |
|                              | 2005-2009           | 13.2   | 12.3 - 14.1 | 66.8                 | 63.7 - 69.9 | 73.8   | 72.1 - 75.5 | 57.9   | 55.0 - 60.8 | 33.0   | 30.6 - 35.4 | 72.6     | 70.4 - 74.8 |
|                              | 2010-2014           | 13.9   | 12.9 - 14.9 | 70.7                 | 67.8 - 73.7 | 75.1   | 73.5 - 76.7 | 59.5   | 56.5 - 62.6 | 36.7   | 34.1 - 39.3 | 76.6     | 74.6 - 78.7 |
| Łódź                         | 2000-2004           | 10.9   | 9.9 - 11.9  | 57.9                 | 52.6 - 63.2 | 66.6   | 64.2 - 69.0 | 49.5   | 46.2 - 52.8 | 29.2   | 26.2 - 32.1 | 61.6     | 57.9 - 65.3 |
|                              | 2005-2009           | 20.5   | 19.3 - 21.7 | 69.3                 | 65.7 - 73.0 | 72.8   | 70.9 - 74.6 | 50.0   | 46.8 - 53.1 | 37.1   | 34.1 - 40.1 | 71.4     | 68.3 - 74.4 |
|                              | 2010-2014           | 17.6   | 16.5 - 18.7 | 75.3                 | 71.9 - 78.6 | 76.4   | 74.6 - 78.2 | 53.5   | 50.2 - 56.9 | 38.7   | 35.6 - 41.7 | 76.0     | 73.4 - 78.7 |
| Lower Silesia                | 2000-2004           | 15.9   | 15.0 - 16.8 | 60.3                 | 56.2 - 64.4 | 71.8   | 69.8 - 73.8 | 51.7   | 48.9 - 54.5 | 34.2   | 31.3 - 37.1 | 65.8     | 62.8 - 68.7 |
|                              | 2005-2009           | 14.2   | 13.3 - 15.1 | 65.2                 | 61.8 - 68.5 | 75.3   | 73.6 - 77.1 | 51.7   | 48.8 - 54.6 | 33.3   | 30.6 - 36.0 | 71.3     | 68.9 - 73.7 |
|                              | 2010-2014           | 13.7   | 12.8 - 14.6 | 67.4                 | 64.0 - 70.8 | 77.3   | 75.6 - 78.9 | 52.6   | 49.5 - 55.7 | 37.0   | 34.1 - 39.8 | 73.4     | 71.1 - 75.8 |
| Lublin                       | 2000-2004           | 10.1 § | 9.0 - 11.1  | 59.0                 | 54.0 - 64.1 | 70.1   | 67.5 - 72.7 | 51.0   | 47.3 - 54.6 | 32.0   | 28.4 - 35.7 | 66.1 §   | 62.4 - 69.8 |
|                              | 2005-2009           | 15.9   | 14.8 - 17.1 | 55.0                 | 50.5 - 59.5 | 76.0   | 73.9 - 78.2 | 53.9   | 50.5 - 57.3 | 38.9   | 35.6 - 42.2 | 75.1     | 72.4 - 77.8 |
|                              | 2010-2014           | 17.0   | 15.7 - 18.2 | 60.4                 | 56.0 - 64.8 | 76.3   | 74.3 - 78.4 | 56.3   | 52.5 - 60.1 | 42.1   | 38.6 - 45.6 | 76.7     | 74.0 - 79.5 |
| Lubush                       | 2000-2004           | 11.8   | 10.3 - 13.4 | 61.3                 | 52.8 - 69.8 | 71.7   | 67.1 - 76.2 | 46.3   | 40.9 - 51.7 | 27.4   | 21.8 - 33.1 | 57.3     | 51.0 - 63.6 |
|                              | 2005-2009           | 14.9   | 13.2 - 16.7 | 66.3                 | 59.5 - 73.1 | 75.4   | 72.1 - 78.7 | 55.9   | 51.1 - 60.7 | 33.8   | 29.1 - 38.5 | 73.6     | 68.8 - 78.3 |
|                              | 2010-2014           | 13.5   | 11.9 - 15.2 | 66.7                 | 59.7 - 73.7 | 76.1   | 72.9 - 79.3 | 52.4   | 47.7 - 57.2 | 33.4   | 28.6 - 38.2 | 80.6     | 76.5 - 84.7 |
| Mazovia                      | 2000-2004           | 9.4    | 8.8 - 10.0  | 67.5                 | 64.7 - 70.3 | 76.4   | 74.8 - 77.9 | 51.1   | 48.8 - 53.4 | 30.4   | 28.1 - 32.7 | 74.3     | 72.2 - 76.4 |
|                              | 2005-2009           | 10.5   | 9.8 - 11.2  | 72.9                 | 70.5 - 75.3 | 78.2   | 76.9 - 79.6 | 53.0   | 50.6 - 55.3 | 35.5   | 33.1 - 37.8 | 77.7     | 76.0 - 79.4 |
|                              | 2010-2014           | 11.7   | 10.9 - 12.4 | 74.8                 | 72.6 - 77.1 | 79.8   | 78.5 - 81.1 | 56.5   | 54.1 - 58.8 | 38.0   | 35.7 - 40.2 | 81.6     | 80.0 - 83.3 |
| Opole                        | 2000-2004           | 10.7   | 9.2 - 12.1  | 59.8                 | 53.6 - 66.0 | 69.6   | 66.1 - 73.2 | 51.4   | 46.4 - 56.3 | 28.0   | 23.8 - 32.2 | 64.9     | 59.8 - 69.9 |
|                              | 2005-2009           | 13.2   | 11.5 - 14.9 | 71.8                 | 65.9 - 77.7 | 73.0   | 69.7 - 76.2 | 54.4   | 49.4 - 59.5 | 38.8   | 33.2 - 44.4 | 72.9     | 68.6 - 77.3 |
|                              | 2010-2014           | 15.7   | 13.6 - 17.7 | 73.1                 | 67.6 - 78.5 | 74.8   | 71.7 - 77.8 | 51.5   | 46.4 - 56.6 | 36.7   | 31.5 - 41.8 | 72.3     | 68.3 - 76.4 |
| Podlaha                      | 2000-2004           | 6.9 §  | 5.8 - 8.0   | 52.8                 | 45.2 - 60.5 | 68.9   | 65.2 - 72.5 | 56.0   | 51.5 - 60.5 | 29.9   | 25.3 - 34.5 | 61.6 §   | 56.7 - 66.4 |
|                              | 2005-2009           | 18.6   | 16.8 - 20.5 | 58.3                 | 51.7 - 64.9 | 74.5   | 71.4 - 77.7 | 62.6   | 58.2 - 67.1 | 41.2   | 36.7 - 45.7 | 72.7     | 68.6 - 76.7 |
|                              | 2010-2014           | 16.8   | 15.1 - 18.6 | 59.4                 | 53.5 - 65.3 | 75.3   | 72.4 - 78.2 | 63.9   | 59.4 - 68.3 | 43.7   | 39.0 - 48.5 | 80.9     | 77.6 - 84.2 |
| Pomerania                    | 2000-2004           | 11.8 § | 10.8 - 12.8 | 71.7                 | 66.5 - 76.9 | 73.3   | 70.8 - 75.7 | 51.2   | 47.9 - 54.5 | 33.8   | 30.4 - 37.2 | 71.6     | 68.2 - 75.1 |
|                              | 2005-2009           | 14.9   | 13.9 - 16.0 | 71.8                 | 68.2 - 75.5 | 75.5   | 73.4 - 77.6 | 58.4   | 55.1 - 61.7 | 34.2   | 30.8 - 37.6 | 78.9     | 76.4 - 81.5 |
|                              | 2010-2014           | 16.3   | 15.2 - 17.4 | 71.1                 | 67.8 - 74.5 | 77.8   | 75.9 - 79.7 | 60.3   | 57.1 - 63.4 | 39.4   | 35.7 - 43.1 | 83.6     | 81.4 - 85.8 |
| Silesia                      | 2000-2004           | 11.1   | 10.4 - 11.8 | 64.8                 | 61.4 - 68.2 | 69.4   | 67.7 - 71.1 | 49.4   | 47.1 - 51.7 | 30.4   | 28.0 - 32.7 | 69.7     | 67.4 - 72.0 |
|                              | 2005-2009           | 12.0   | 11.3 - 12.7 | 64.7                 | 61.8 - 67.5 | 73.0   | 71.5 - 74.6 | 48.9   | 46.6 - 51.3 | 31.9   | 29.9 - 34.0 | 78.0     | 76.1 - 79.9 |
|                              | 2010-2014           | 13.4   | 12.6 - 14.2 | 67.4                 | 64.7 - 70.1 | 75.0   | 73.5 - 76.4 | 46.6   | 44.2 - 49.1 | 33.4   | 31.3 - 35.6 | 80.0     | 78.2 - 81.8 |
| Subcarpathia                 | 2000-2004           | 13.1   | 11.8 - 14.3 | 51.2                 | 46.4 - 56.0 | 66.4   | 63.7 - 69.2 | 61.0   | 57.5 - 64.5 | 34.7   | 31.1 - 38.3 | 65.9     | 62.6 - 69.2 |
|                              | 2005-2009           | 15.8   | 14.6 - 17.0 | 58.8                 | 54.4 - 63.2 | 67.5   | 65.1 - 69.9 | 54.1   | 50.3 - 57.9 | 33.8   | 30.6 - 37.0 | 70.0     | 67.3 - 72.7 |
|                              | 2010-2014           | 16.4   | 15.1 - 17.7 | 63.2                 | 58.9 - 67.5 | 69.7   | 67.4 - 72.0 | 57.4   | 53.4 - 61.4 | 36.3   | 32.8 - 39.8 | 75.1     | 72.7 - 77.5 |
| Warmia-Mazuria               | 2000-2004           | 12.6   | 11.3 - 13.8 | 52.9                 | 46.2 - 59.7 | 70.7   | 67.3 - 74.1 | 46.4   | 42.1 - 50.6 | 34.2   | 28.7 - 39.7 | 66.4     | 61.7 - 71.1 |
|                              | 2005-2009           | 14.6   | 13.3 - 15.9 | 53.1                 | 47.3 - 59.0 | 77.7   | 74.8 - 80.7 | 57.7   | 53.3 - 62.1 | 37.8   | 33.3 - 42.3 | 70.6     | 66.8 - 74.4 |
|                              | 2010-2014           | 14.6   | 13.2 - 16.0 | 65.4                 | 60.1 - 70.8 | 77.4   | 74.7 - 80.2 | 59.0   | 54.8 - 63.1 | 42.2   | 38.0 - 46.3 | 76.3     | 72.8 - 79.8 |
| West Pomerania               | 2000-2004           | 15.0   | 13.7 - 16.2 | 69.0                 | 63.1 - 74.9 | 75.5   | 72.5 - 78.4 | 51.6   | 48.0 - 55.1 | 38.3   | 33.7 - 42.8 | 67.8 §   | 63.6 - 72.0 |
|                              | 2005-2009           | 17.6   | 16.2 - 19.0 | 70.3                 | 66.0 - 74.6 | 75.9   | 73.4 - 78.4 | 55.8   | 52.1 - 59.5 | 39.6   | 34.8 - 44.5 | 76.3     | 72.8 - 79.9 |
|                              | 2010-2014           | 14.5   | 13.2 - 15.7 | 74.2                 | 70.0 - 78.4 | 78.1   | 75.8 - 80.5 | 55.1   | 51.0 - 59.3 | 39.3   | 34.8 - 43.8 | 80.0     | 76.3 - 83.6 |
| Portugal *<br>(4 registries) | 2000-2004           | 10.6   | 10.0 - 11.2 | 78.8                 | 76.8 - 80.7 | 81.6   | 80.7 - 82.5 | 60.4   | 58.6 - 62.2 | 39.9   | 37.7 - 42.1 | 87.2     | 86.2 - 88.1 |
|                              | 2005-2009           | 14.1   | 13.5 - 14.7 | 81.7                 | 80.2 - 83.2 | 86.1   | 85.3 - 86.9 | 65.3   | 63.6 - 67.0 | 41.8   | 39.7 - 44.0 | 90.0     | 89          |

**Web-table 4.2: Age-standardised five-year net survival (NS, %): adults (15-99 years) diagnosed with cancer of the lung, melanoma of the skin, cancer of the breast, ovary, cervix or prostate, by continent, country, registry and calendar period of diagnosis (2000-2004, 2005-2009, 2010-2014)**

|                                   | Period of diagnosis | Lung   |             | Melanoma of the skin |              | Breast |             | Cervix |              | Ovary  |             | Prostate |              |
|-----------------------------------|---------------------|--------|-------------|----------------------|--------------|--------|-------------|--------|--------------|--------|-------------|----------|--------------|
|                                   |                     | NS (%) | 95% CI      | NS (%)               | 95% CI       | NS (%) | 95% CI      | NS (%) | 95% CI       | NS (%) | 95% CI      | NS (%)   | 95% CI       |
| Romania (Cluj)                    | 2000-2004           |        | -           |                      | -            |        | -           |        | -            |        | -           |          | -            |
|                                   | 2005-2009           | 7.9 §  | 6.1 - 9.6   | 68.4                 | 61.5 - 75.3  | 74.8   | 70.4 - 79.3 | 61.7   | 57.0 - 66.5  | 28.9 § | 22.3 - 35.6 | 78.2     | 72.5 - 83.8  |
|                                   | 2010-2014           | 11.1 § | 8.7 - 13.6  | 71.3                 | 63.0 - 79.6  | 74.8   | 68.5 - 81.1 | 65.3   | 59.7 - 70.9  | 37.2 § | 29.7 - 44.6 | 77.1     | 70.0 - 84.2  |
| Russian Federation (5 registries) | 2000-2004           | 16.8   | 15.7 - 17.8 | 64.7                 | 61.4 - 68.0  | 71.6   | 69.8 - 73.4 | 59.8   | 57.3 - 62.2  | 38.1   | 35.2 - 41.1 | 58.8     | 55.4 - 62.1  |
|                                   | 2005-2009           | 13.9   | 13.2 - 14.6 | 63.3                 | 60.3 - 66.3  | 67.7   | 66.4 - 69.0 | 58.0   | 56.0 - 59.9  | 33.2   | 31.3 - 35.0 | 68.6     | 66.2 - 71.0  |
|                                   | 2010-2014           | 13.7   | 13.0 - 14.4 | 66.5                 | 63.6 - 69.3  | 70.8   | 69.5 - 72.1 | 57.7   | 55.7 - 59.7  | 34.8   | 32.8 - 36.8 | 79.3     | 77.1 - 81.5  |
| Arkhangelsk                       | 2000-2004           | 12.4   | 10.5 - 14.3 | 59.9                 | 52.6 - 67.1  | 59.6   | 55.4 - 63.8 | 54.0   | 48.8 - 59.3  | 34.0   | 29.3 - 38.7 | 61.6     | 54.7 - 68.5  |
|                                   | 2005-2009           | 14.5   | 12.6 - 16.5 | 61.8                 | 55.5 - 68.0  | 70.9   | 67.1 - 74.6 | 53.7   | 48.3 - 59.2  | 36.0   | 31.1 - 40.9 | 70.8     | 65.1 - 76.6  |
|                                   | 2010-2014           | 12.3   | 10.7 - 13.9 | 65.5                 | 59.8 - 71.2  | 72.4   | 69.1 - 75.7 | 63.2   | 58.3 - 68.2  | 37.1   | 32.3 - 41.9 | 81.4     | 76.0 - 86.9  |
| Karelia                           | 2000-2004           | 17.8   | 14.2 - 21.4 | 60.6                 | 52.4 - 68.8  | 78.0   | 72.1 - 83.9 | 58.7   | 51.1 - 66.3  | 31.4   | 24.2 - 38.7 | 70.9     | 61.1 - 80.8  |
|                                   | 2005-2009           | 13.8   | 11.2 - 16.4 | 71.3                 | 63.9 - 78.7  | 78.1   | 73.4 - 82.8 | 73.6   | 66.3 - 80.8  | 39.4   | 32.5 - 46.4 | 83.3     | 75.9 - 90.7  |
|                                   | 2010-2014           | 13.1   | 10.7 - 15.6 | 69.5                 | 62.2 - 76.8  | 79.3   | 74.7 - 83.9 | 69.2 § | 62.8 - 75.6  | 33.0   | 27.1 - 38.9 | 83.7     | 76.7 - 90.8  |
| Omsk                              | 2000-2004           | 21.8   | 18.3 - 25.4 |                      | -            | 92.0   | 87.2 - 96.9 | 58.4   | 52.7 - 64.2  | 39.7   | 32.3 - 47.1 | 56.0     | 48.8 - 63.3  |
|                                   | 2005-2009           | 14.9   | 13.2 - 16.6 |                      | -            | 61.1   | 58.6 - 63.7 | 59.4   | 55.6 - 63.3  | 35.3   | 31.0 - 39.5 | 66.1     | 61.2 - 71.0  |
|                                   | 2010-2014           | 14.5   | 12.8 - 16.2 |                      | -            | 64.0 § | 61.5 - 66.5 | 55.5   | 51.6 - 59.3  | 37.3   | 32.9 - 41.7 | 75.4     | 71.2 - 79.5  |
| Samara                            | 2000-2004           | 17.7   | 16.3 - 19.1 | 66.1                 | 62.1 - 70.1  | 70.8   | 68.5 - 73.1 | 61.9   | 58.6 - 65.3  | 39.9   | 35.7 - 44.1 | 55.7     | 51.8 - 59.7  |
|                                   | 2005-2009           | 12.6   | 11.6 - 13.6 | 61.2                 | 57.5 - 65.0  | 66.9   | 65.0 - 68.8 | 53.4   | 50.4 - 56.5  | 31.9   | 29.2 - 34.5 | 65.5     | 61.9 - 69.1  |
|                                   | 2010-2014           | 13.7   | 12.7 - 14.8 | 65.3                 | 61.7 - 69.0  | 71.0   | 69.2 - 72.8 | 56.1   | 52.8 - 59.4  | 35.5   | 32.4 - 38.6 | 79.3     | 76.0 - 82.6  |
| Tomsk                             | 2000-2004           |        | -           |                      | -            |        | -           |        | -            |        | -           |          | -            |
|                                   | 2005-2009           | 16.0   | 13.6 - 18.3 |                      | -            | 70.5   | 65.9 - 75.2 | 55.3   | 50.5 - 60.2  | 25.7   | 21.0 - 30.4 | 63.4     | 57.4 - 69.4  |
|                                   | 2010-2014           | 13.8   | 11.8 - 15.9 |                      | -            | 68.0   | 63.9 - 72.2 | 53.6   | 49.0 - 58.3  | 26.6   | 21.5 - 31.8 | 73.2     | 67.3 - 79.1  |
| Slovakia *                        | 2000-2004           | 9.5 §  | 8.7 - 10.3  | 75.0                 | 72.7 - 77.3  | 75.3   | 73.5 - 77.2 | 61.8   | 59.4 - 64.3  | 35.0   | 32.4 - 37.6 | 63.6     | 61.1 - 66.0  |
|                                   | 2005-2009           | 10.5   | 9.7 - 11.2  | 79.7                 | 77.7 - 81.7  | 76.6   | 75.1 - 78.2 | 58.9   | 56.5 - 61.3  | 34.5   | 31.7 - 37.3 | 74.4     | 72.7 - 76.2  |
|                                   | 2010-2014           | 11.2   | 9.5 - 12.8  | 78.2                 | 73.9 - 82.5  | 75.5   | 72.4 - 78.5 | 60.5   | 56.2 - 64.9  | 33.4   | 28.6 - 38.2 | 74.7     | 70.9 - 78.6  |
| Slovenia *                        | 2000-2004           | 9.9    | 9.1 - 10.8  | 79.3                 | 76.7 - 81.9  | 78.7   | 76.9 - 80.5 | 67.2   | 63.8 - 70.7  | 37.8   | 34.4 - 41.2 | 74.4     | 71.9 - 76.9  |
|                                   | 2005-2009           | 12.7   | 11.7 - 13.7 | 85.0                 | 83.0 - 87.0  | 82.5   | 81.0 - 84.1 | 67.1   | 63.3 - 70.9  | 35.4   | 32.3 - 38.4 | 83.2     | 81.6 - 84.8  |
|                                   | 2010-2014           | 14.8   | 13.6 - 16.1 | 85.1                 | 83.0 - 87.1  | 83.5   | 81.8 - 85.2 | 65.5   | 61.3 - 69.8  | 37.0   | 33.4 - 40.5 | 85.0     | 83.3 - 86.7  |
| Spain (10 registries)             | 2000-2004           | 10.8   | 10.4 - 11.3 | 85.3                 | 83.8 - 86.8  | 82.9   | 82.0 - 83.8 | 63.6   | 61.3 - 65.9  | 36.0   | 34.1 - 37.9 | 85.0     | 84.1 - 85.9  |
|                                   | 2005-2009           | 12.5   | 12.0 - 13.0 | 87.1                 | 85.9 - 88.3  | 84.6   | 83.8 - 85.4 | 64.5   | 62.2 - 66.8  | 37.9   | 36.1 - 39.6 | 90.4     | 89.7 - 91.1  |
|                                   | 2010-2014           | 13.5   | 12.7 - 14.3 | 86.8                 | 84.8 - 88.7  | 85.2   | 84.0 - 86.5 | 64.5   | 60.8 - 68.1  | 39.8   | 36.9 - 42.7 | 89.7     | 88.6 - 90.7  |
| Basque Country                    | 2000-2004           | 10.8   | 9.9 - 11.6  | 83.9                 | 81.2 - 86.6  | 81.9   | 80.3 - 83.5 | 60.0   | 55.2 - 64.7  | 39.4   | 35.9 - 43.0 | 86.7     | 85.2 - 88.2  |
|                                   | 2005-2009           | 12.6   | 11.7 - 13.5 | 86.6                 | 84.2 - 88.9  | 84.5   | 83.1 - 85.9 | 64.9   | 60.5 - 69.3  | 40.1   | 36.8 - 43.4 | 91.6     | 90.3 - 92.8  |
|                                   | 2010-2014           | 14.3   | 13.3 - 15.4 | 85.8                 | 83.2 - 88.4  | 85.6   | 84.1 - 87.1 | 67.7   | 62.9 - 72.6  | 43.5   | 39.8 - 47.3 | 90.5     | 89.3 - 91.8  |
| Canaries                          | 2000-2004           | 9.0    | 7.9 - 10.1  | 86.4                 | 82.1 - 90.6  | 84.3   | 82.1 - 86.5 | 69.6   | 64.5 - 74.8  | 33.6   | 28.9 - 38.4 | 84.2     | 82.1 - 86.4  |
|                                   | 2005-2009           | 9.8    | 8.7 - 10.9  | 85.4                 | 82.2 - 88.7  | 84.1   | 82.2 - 86.0 | 65.6   | 60.3 - 70.9  | 29.4   | 25.3 - 33.5 | 90.6     | 88.9 - 92.4  |
|                                   | 2010-2014           | 10.3   | 8.6 - 12.0  | 84.5                 | 79.1 - 89.9  | 86.3   | 83.4 - 89.3 | 64.4   | 56.3 - 72.5  | 31.4   | 24.7 - 38.0 | 88.9     | 86.3 - 91.5  |
| Girona                            | 2000-2004           | 11.9   | 10.1 - 13.7 | 84.0                 | 78.9 - 89.1  | 83.7   | 80.9 - 86.5 | 64.9   | 56.5 - 73.2  | 31.2   | 25.4 - 37.0 | 88.3     | 85.6 - 91.1  |
|                                   | 2005-2009           | 15.4   | 13.6 - 17.2 | 86.4                 | 82.0 - 90.9  | 85.7   | 83.1 - 88.3 | 58.3   | 50.3 - 66.2  | 41.1   | 34.8 - 47.5 | 91.8     | 89.6 - 94.0  |
|                                   | 2010-2014           | 14.6   | 12.6 - 16.6 | 88.6                 | 83.9 - 93.3  | 83.9   | 80.9 - 86.9 | 49.6   | 40.8 - 58.4  | 41.9   | 34.5 - 49.3 | 91.6     | 89.0 - 94.1  |
| Granada                           | 2000-2004           | 7.7    | 6.2 - 9.1   | 86.5                 | 81.7 - 91.3  | 79.7   | 76.5 - 82.9 | 57.7   | 49.5 - 66.0  | 36.0   | 29.7 - 42.3 | 79.4     | 76.2 - 82.7  |
|                                   | 2005-2009           | 9.0    | 7.6 - 10.4  | 85.5                 | 81.6 - 89.3  | 82.4   | 79.4 - 85.3 | 71.8   | 65.1 - 78.6  | 41.0   | 35.7 - 46.3 | 86.0     | 83.4 - 88.6  |
|                                   | 2010-2014           | 9.8    | 7.8 - 11.7  | 83.7                 | 78.7 - 88.8  | 83.6   | 80.0 - 87.2 | 65.1   | 56.7 - 73.5  | 42.4   | 34.3 - 50.4 | 86.3     | 83.2 - 89.4  |
| Mallorca                          | 2000-2004           | 10.9   | 9.4 - 12.5  | 89.2                 | 84.6 - 93.8  | 84.6   | 81.4 - 87.7 | 58.4   | 52.1 - 64.7  | 40.6   | 34.1 - 47.1 | 84.9     | 81.4 - 88.5  |
|                                   | 2005-2009           | 11.0   | 9.6 - 12.5  | 93.1                 | 89.3 - 96.9  | 84.5   | 81.7 - 87.4 | 59.1   | 52.2 - 66.1  | 32.8   | 27.3 - 38.3 | 89.1     | 86.7 - 91.5  |
|                                   | 2010-2014           | 12.0   | 10.0 - 13.9 | 88.7                 | 83.3 - 94.0  | 84.5   | 81.0 - 88.1 | 55.8   | 47.1 - 64.5  | 36.2   | 28.5 - 43.9 | 88.8     | 85.8 - 91.8  |
| Murcia                            | 2000-2004           | 11.9   | 10.5 - 13.2 | 83.4                 | 79.5 - 87.3  | 85.6   | 83.1 - 88.2 | 63.6   | 58.0 - 69.3  | 30.8   | 26.6 - 35.0 | 81.5     | 78.9 - 84.2  |
|                                   | 2005-2009           | 14.4   | 13.1 - 15.8 | 84.0                 | 80.7 - 87.3  | 84.4   | 82.0 - 86.7 | 64.7   | 59.3 - 70.2  | 40.8   | 35.9 - 45.7 | 88.9     | 87.2 - 90.6  |
|                                   | 2010-2014           | 12.1   | 9.3 - 14.9  | 84.6                 | 77.2 - 92.1  | 84.3   | 79.4 - 89.2 | 60.4   | 49.4 - 71.4  | 31.4   | 22.3 - 40.5 | 88.3     | 84.9 - 91.6  |
| Navarra                           | 2000-2004           | 13.8   | 11.9 - 15.6 | 85.6                 | 80.6 - 90.6  | 83.4   | 80.6 - 86.2 | 67.2   | 56.1 - 78.2  | 38.2   | 32.1 - 44.2 | 85.3     | 82.6 - 88.0  |
|                                   | 2005-2009           | 17.0   | 15.0 - 19.0 | 91.0                 | 87.0 - 95.0  | 86.9   | 84.2 - 89.6 | 69.4   | 60.4 - 78.3  | 38.5   | 32.5 - 44.5 | 88.2     | 85.6 - 90.8  |
|                                   | 2010-2014           | 21.0   | 15.8 - 26.2 | 82.8                 | 72.3 - 93.3  | 85.7   | 80.4 - 91.1 | 74.6   | 58.7 - 90.6  | 50.2   | 38.7 - 61.7 | 89.8     | 84.4 - 95.3  |
| Tarragona                         | 2000-2004           | 11.1   | 9.4 - 12.8  | 81.9                 | 77.2 - 86.6  | 80.5   | 77.8 - 83.3 | 69.1   | 62.1 - 76.2  | 35.9   | 29.7 - 42.1 | 83.5     | 80.2 - 86.8  |
|                                   | 2005-2009           | 12.7   | 11.0 - 14.3 | 86.8                 | 82.9 - 90.8  | 84.9   | 82.3 - 87.5 | 61.2   | 53.5 - 68.9  | 36.3   | 30.3 - 42.2 | 91.9     | 89.7 - 94.1  |
|                                   | 2010-2014           | 13.6   | 10.8 - 16.3 | 86.7                 | 80.4 - 93.0  | 83.6   | 79.7 - 87.5 | 73.0   | 61.4 - 84.7  | 35.9   | 26.9 - 44.9 | 90.2     | 87.1 - 93.2  |
| Spain Childhood                   | 2000-2004           |        | -           |                      | -            |        | -           |        | -            |        | -           |          | -            |
|                                   | 2005-2009           |        | -           |                      | -            |        | -           |        | -            |        | -           |          | -            |
|                                   | 2010-2014           |        | -           |                      | -            |        | -           |        | -            |        | -           |          | -            |
| Valencia Childhood                | 2000-2004           |        | -           |                      | -            |        | -           |        | -            |        | -           |          | -            |
|                                   | 2005-2009           |        | -           |                      | -            |        | -           |        | -            |        | -           |          | -            |
|                                   | 2010-2014           |        | -           |                      | -            |        | -           |        | -            |        | -           |          | -            |
| Sweden *                          | 2000-2004           | 13.9   | 13.2 - 14.6 | 88.9                 | 88.1 - 89.8  | 85.6   | 84.9 - 86.3 | 66.9   | 64.7 - 69.1  | 43.2   | 41.6 - 44.8 | 85.9     | 85.3 - 86.5  |
|                                   | 2005-2009           | 16.6   | 15.9 - 17.3 | 90.3                 | 89.5 - 91.0  | 87.9   | 87.2 - 88.5 | 67.7   | 65.6 - 69.9  | 42.9   | 41.2 - 44.6 | 90.1     | 89.6 - 90.6  |
|                                   | 2010-2014           | 19.5   | 18.7 - 20.2 | 91.5                 | 90.9 - 92.2  | 88.8   | 88.2 - 89.4 | 68.3   | 66.1 - 70.4  | 46.5   | 44.8 - 48.2 | 90.7     | 90.2 - 91.2  |
| Switzerland (10 registries)       | 2000-2004           | 14.7   | 13.8 - 15.6 | 90.7                 | 88.4 - 92.9  | 84.4   | 83.3 - 85.5 | 63.4   | 58.4 - 68.4  | 36.9   | 34.4 - 39.5 | 86.9     | 85.8 - 87.9  |
|                                   | 2005-2009           | 17.3   | 16.5 - 18.2 | 92.4                 | 91.3 - 93.5  | 86.4   | 85.3 - 87.4 | 69.4   | 65.1 - 73.6  | 42.0   | 39.5 - 44.4 | 88.6     | 87.6 - 89.5  |
|                                   | 2010-2014           | 20.4   | 19.4 - 21.4 | 93.6                 | 92.4 - 94.7  | 86.2   | 85.1 - 87.3 | 71.4   | 66.6 - 76.2  | 44.1   | 41.3 - 46.8 | 89.2     | 88.2 - 90.3  |
| Basel                             | 2000-2004           | 14.0   | 11.2 - 16.7 | 92.4                 | 86.2 - 98.5  | 85.7   | 82.1 - 89.4 | 59.2   | 44.4 - 73.9  | 45.2   | 35.8 - 54.5 | 90.2     | 86.7 - 93.8  |
|                                   | 2005-2009           | 20.7   | 17.2 - 24.1 | 94.1 §               | 89.5 - 98.7  | 82.5 § | 78.2 - 86.8 | 46.4 § | 30.4 - 62.4  | 42.1   | 31.6 - 52.6 | 91.0 §   | 87.7 - 94.2  |
|                                   | 2010-2014           | 19.4   | 14.5 - 24.3 | 95.3 §               | 88.8 - 100.0 | 84.3 § | 78.8 - 89.9 | 64.8 § | 40.5 - 89.2  | 57.4 § | 41.8 - 73.0 | 92.4 §   | 87.5 - 97.4  |
| Fribourg                          | 2000-2004           |        | -           |                      | -            |        | -           |        | -            |        | -           |          | -            |
|                                   | 2005-2009           | 18.3   | 14.6 - 22.1 | 89.3                 | 84.8 - 93.9  | 84.5   | 79.7 - 89.2 | 87.7   | 73.0 - 100.0 | 48.4   | 37.6 - 59.2 | 90.7     | 86.7 - 94.7  |
|                                   | 2010-2014           | 22.0   | 17.6 - 26.4 | 96.4                 | 92.6 - 100.0 | 84.7   | 78.6 - 90.9 | 60.6   | 33.7 - 87.5  | 39.3   | 29.0 - 49.5 | 98.4     | 93.8 - 100.0 |
| Geneva                            | 2000-2004           | 19.1   | 16.5 - 21.8 | 93.8 §               | 90.9 - 96.7  | 88.5   | 85.8 - 91.2 | 63.8   | 55.2 - 72.3  | 36.9   | 30.3 - 43.5 | 85.8     | 83.1 - 8     |

**Web-table 4.2: Age-standardised five-year net survival (NS, %): adults (15-99 years) diagnosed with cancer of the lung, melanoma of the skin, cancer of the breast, ovary, cervix or prostate, by continent, country, registry and calendar period of diagnosis (2000-2004, 2005-2009, 2010-2014)**

|                                    | Period of diagnosis | Lung   |             | Melanoma of the skin |             | Breast |             | Cervix |             | Ovary  |             | Prostate |             |
|------------------------------------|---------------------|--------|-------------|----------------------|-------------|--------|-------------|--------|-------------|--------|-------------|----------|-------------|
|                                    |                     | NS (%) | 95% CI      | NS (%)               | 95% CI      | NS (%) | 95% CI      | NS (%) | 95% CI      | NS (%) | 95% CI      | NS (%)   | 95% CI      |
| St Gallen-Appenzell                | 2000-2004           | 13.2   | 11.0 - 15.4 | 88.1                 | 84.2 - 91.9 | 80.6   | 77.6 - 83.7 | 70.7   | 61.0 - 80.4 | 33.0   | 27.2 - 38.8 | 85.8     | 82.9 - 88.7 |
|                                    | 2005-2009           | 14.2   | 12.0 - 16.4 | 92.0                 | 89.0 - 95.0 | 81.7   | 78.7 - 84.7 | 65.8   | 57.4 - 74.2 | 39.9   | 33.9 - 45.9 | 88.0     | 85.8 - 90.1 |
|                                    | 2010-2014           | 18.5   | 15.9 - 21.1 | 93.3                 | 90.6 - 95.9 | 83.0   | 80.2 - 85.8 | 68.2   | 60.2 - 76.3 | 45.1   | 38.7 - 51.5 | 87.2     | 84.9 - 89.5 |
| Ticino                             | 2000-2004           | 14.8   | 12.3 - 17.3 | 87.0                 | 83.3 - 90.6 | 86.3   | 83.1 - 89.6 | 66.4   | 57.4 - 75.4 | 40.9   | 33.4 - 48.3 | 84.4     | 80.2 - 88.6 |
|                                    | 2005-2009           | 17.2   | 14.5 - 19.8 | 89.8                 | 86.1 - 93.6 | 85.6   | 83.0 - 88.2 | 79.2   | 70.7 - 87.7 | 41.4   | 34.5 - 48.3 | 87.8     | 84.8 - 90.7 |
|                                    | 2010-2014           | 21.6   | 18.8 - 24.4 | 90.2                 | 86.6 - 93.8 | 85.3   | 82.7 - 87.8 | 76.0   | 66.7 - 85.3 | 41.8   | 34.5 - 49.2 | 88.3     | 85.3 - 91.3 |
| Valais                             | 2000-2004           | 15.9   | 12.9 - 18.8 | 89.4                 | 84.5 - 94.4 | 87.1   | 83.6 - 90.6 | 70.5   | 61.7 - 79.4 | 40.4   | 32.1 - 48.6 | 87.9     | 84.2 - 91.6 |
|                                    | 2005-2009           | 16.5   | 13.4 - 19.5 | 89.8                 | 86.0 - 93.6 | 83.7   | 80.3 - 87.1 | 73.9   | 65.4 - 82.4 | 37.8   | 30.4 - 45.2 | 90.5     | 87.5 - 93.6 |
|                                    | 2010-2014           | 18.9   | 15.8 - 22.0 | 92.9                 | 89.2 - 96.5 | 84.9   | 81.5 - 88.2 | 75.1   | 59.7 - 90.5 | 45.4   | 37.4 - 53.5 | 92.7     | 89.8 - 95.6 |
| Zürich and Zug                     | 2000-2004           | 14.2   | 12.7 - 15.7 | 89.7 §               | 87.4 - 91.9 | 81.9   | 79.9 - 83.8 | 63.7 § | 56.9 - 70.5 | 32.1   | 27.9 - 36.3 | 87.1     | 85.4 - 88.7 |
|                                    | 2005-2009           | 18.2   | 16.7 - 19.7 | 92.2                 | 90.5 - 93.9 | 87.2   | 85.6 - 88.8 | 61.7   | 55.2 - 68.3 | 43.8   | 39.6 - 47.9 | 87.9     | 86.4 - 89.3 |
|                                    | 2010-2014           | 21.0   | 19.1 - 22.9 | 94.1 §               | 92.3 - 95.9 | 87.6 § | 85.8 - 89.4 | 67.1 § | 59.3 - 74.9 | 41.4 § | 36.8 - 45.9 | 87.7 §   | 86.1 - 89.3 |
| Switzerland (Childhood) †          | 2000-2004           | -      | -           | -                    | -           | -      | -           | -      | -           | -      | -           | -        | -           |
|                                    | 2005-2009           | -      | -           | -                    | -           | -      | -           | -      | -           | -      | -           | -        | -           |
|                                    | 2010-2014           | -      | -           | -                    | -           | -      | -           | -      | -           | -      | -           | -        | -           |
| United Kingdom *<br>(4 registries) | 2000-2004           | 8.3    | 8.1 - 8.5   | 86.4                 | 85.9 - 86.8 | 79.8   | 79.5 - 80.1 | 58.9   | 58.0 - 59.9 | 30.2   | 29.7 - 30.7 | 81.9     | 81.6 - 82.3 |
|                                    | 2005-2009           | 10.1   | 9.9 - 10.3  | 89.2                 | 88.9 - 89.6 | 83.8   | 83.6 - 84.1 | 61.9   | 61.0 - 62.9 | 33.2   | 32.6 - 33.7 | 86.7     | 86.4 - 86.9 |
|                                    | 2010-2014           | 13.3   | 13.1 - 13.5 | 90.9                 | 90.6 - 91.3 | 85.6   | 85.4 - 85.9 | 63.8   | 62.8 - 64.7 | 36.2   | 35.7 - 36.8 | 88.7     | 88.5 - 89.0 |
| England                            | 2000-2004           | 8.2    | 8.1 - 8.4   | 86.3                 | 85.8 - 86.9 | 80.1   | 79.8 - 80.4 | 59.0   | 57.9 - 60.0 | 29.6   | 29.0 - 30.2 | 82.4     | 82.0 - 82.7 |
|                                    | 2005-2009           | 10.1   | 9.9 - 10.3  | 89.3                 | 88.9 - 89.7 | 84.1   | 83.8 - 84.4 | 62.3   | 61.3 - 63.4 | 33.5   | 32.9 - 34.1 | 87.2     | 86.9 - 87.5 |
|                                    | 2010-2014           | 13.4   | 13.2 - 13.7 | 90.9                 | 90.5 - 91.3 | 86.0   | 85.7 - 86.3 | 63.7   | 62.7 - 64.8 | 37.0   | 36.4 - 37.7 | 89.3     | 89.0 - 89.5 |
| Northern Ireland                   | 2000-2004           | 10.2   | 9.0 - 11.4  | 89.0                 | 86.2 - 91.7 | 78.3   | 76.4 - 80.2 | 58.7   | 53.4 - 64.0 | 29.7   | 26.6 - 32.9 | 81.6     | 79.3 - 83.8 |
|                                    | 2005-2009           | 11.0   | 9.9 - 12.2  | 90.4                 | 87.9 - 92.8 | 81.3   | 79.5 - 83.0 | 63.7   | 58.0 - 69.4 | 32.6   | 29.4 - 35.7 | 87.9     | 86.2 - 89.7 |
|                                    | 2010-2014           | 12.7   | 11.5 - 13.9 | 93.0                 | 90.9 - 95.2 | 83.0   | 81.4 - 84.7 | 68.6   | 62.5 - 74.6 | 32.3   | 29.3 - 35.3 | 87.4     | 85.8 - 88.9 |
| Scotland                           | 2000-2004           | 8.3    | 7.8 - 8.8   | 89.4                 | 87.9 - 90.9 | 79.5   | 78.5 - 80.5 | 58.9   | 56.0 - 61.8 | 34.1   | 32.5 - 35.8 | 81.1     | 79.8 - 82.4 |
|                                    | 2005-2009           | 10.3   | 9.8 - 10.9  | 91.8                 | 90.6 - 93.0 | 83.5   | 82.6 - 84.4 | 59.3   | 56.4 - 62.3 | 32.0   | 30.3 - 33.7 | 83.5     | 82.3 - 84.6 |
|                                    | 2010-2014           | 12.9   | 12.3 - 13.5 | 93.2                 | 92.1 - 94.4 | 84.9   | 84.0 - 85.8 | 61.8   | 58.9 - 64.7 | 32.5   | 30.7 - 34.2 | 85.0     | 84.0 - 86.1 |
| Wales                              | 2000-2004           | 8.0    | 7.3 - 8.8   | 79.5                 | 77.4 - 81.6 | 76.4   | 75.2 - 77.5 | 56.9   | 53.3 - 60.5 | 30.0   | 27.8 - 32.3 | 76.4     | 75.1 - 77.8 |
|                                    | 2005-2009           | 9.0    | 8.2 - 9.8   | 83.1                 | 81.3 - 84.8 | 81.1   | 80.1 - 82.2 | 59.2   | 55.5 - 63.0 | 30.8   | 28.5 - 33.0 | 83.2     | 82.1 - 84.3 |
|                                    | 2010-2014           | 12.0   | 11.1 - 12.9 | 86.3                 | 84.8 - 87.9 | 82.1   | 81.0 - 83.1 | 64.3   | 60.3 - 68.3 | 32.8   | 30.5 - 35.1 | 86.2     | 85.2 - 87.2 |
| <b>OCEANIA</b>                     |                     |        |             |                      |             |        |             |        |             |        |             |          |             |
| Australia *<br>(8 registries)      | 2000-2004           | 14.8   | 14.4 - 15.2 | 92.0                 | 91.7 - 92.4 | 87.0   | 86.5 - 87.4 | 67.9   | 66.1 - 69.6 | 37.3   | 36.1 - 38.6 | 87.8     | 87.4 - 88.2 |
|                                    | 2005-2009           | 17.1   | 16.7 - 17.5 | 92.5                 | 92.2 - 92.8 | 88.5   | 88.1 - 89.0 | 67.5   | 65.7 - 69.3 | 41.0   | 39.8 - 42.2 | 93.2     | 92.9 - 93.5 |
|                                    | 2010-2014           | 19.4   | 19.0 - 19.9 | 92.9                 | 92.5 - 93.2 | 89.5   | 89.1 - 90.0 | 66.4   | 64.5 - 68.2 | 42.0   | 40.8 - 43.2 | 94.5     | 94.1 - 94.8 |
| Australian Capital Territory       | 2000-2004           | 19.9   | 15.7 - 24.1 | 90.3                 | 86.9 - 93.7 | 88.3   | 84.1 - 92.5 | 81.7   | 71.3 - 92.2 | 40.2   | 31.6 - 48.8 | 88.6     | 85.2 - 92.0 |
|                                    | 2005-2009           | 18.8   | 15.3 - 22.2 | 89.7                 | 86.9 - 92.6 | 89.5   | 85.7 - 93.4 | 70.3   | 56.0 - 84.6 | 36.4   | 27.9 - 44.9 | 90.5     | 87.7 - 93.4 |
|                                    | 2010-2014           | 20.1   | 15.3 - 24.8 | 88.0                 | 84.7 - 91.3 | 90.2   | 86.2 - 94.3 | 50.2   | 40.7 - 59.8 | 38.2   | 28.6 - 47.7 | 91.5     | 88.4 - 94.6 |
| New South Wales                    | 2000-2004           | 15.6   | 14.9 - 16.3 | 91.2                 | 90.6 - 91.8 | 86.9   | 86.1 - 87.7 | 67.4   | 64.5 - 70.3 | 37.6   | 35.5 - 39.7 | 87.8     | 87.1 - 88.5 |
|                                    | 2005-2009           | 18.0   | 17.3 - 18.8 | 92.9                 | 92.3 - 93.4 | 89.2   | 88.3 - 90.1 | 67.5   | 64.4 - 70.6 | 41.0   | 38.8 - 43.2 | 94.0     | 93.5 - 94.6 |
|                                    | 2010-2014           | 19.4   | 18.4 - 20.3 | 93.9                 | 93.2 - 94.6 | 90.6   | 89.6 - 91.6 | 66.1   | 62.3 - 69.9 | 41.1   | 38.4 - 43.7 | 96.4     | 95.6 - 97.1 |
| Northern Territory                 | 2000-2004           | 6.8    | 3.8 - 9.7   | 84.0                 | 78.2 - 89.9 | 77.2   | 66.1 - 88.3 | 64.3   | 49.6 - 79.0 | 53.4   | 36.9 - 69.9 | 84.0     | 78.2 - 89.7 |
|                                    | 2005-2009           | 10.7   | 7.5 - 14.0  | 94.2                 | 88.6 - 99.9 | 77.8   | 68.8 - 86.7 | 67.3   | 54.2 - 80.4 | 65.8   | 48.7 - 82.8 | 83.0     | 77.6 - 88.3 |
|                                    | 2010-2014           | 10.0   | 6.6 - 13.5  | 91.5                 | 86.2 - 96.8 | 71.3   | 61.9 - 80.7 | 68.7   | 54.4 - 83.0 | 60.8   | 43.0 - 78.6 | 86.1     | 80.7 - 91.6 |
| Queensland                         | 2000-2004           | 15.1   | 14.2 - 16.0 | 93.1                 | 92.5 - 93.8 | 86.7   | 85.5 - 87.8 | 69.8   | 66.1 - 73.5 | 42.1   | 39.3 - 45.0 | 87.4     | 86.5 - 88.4 |
|                                    | 2005-2009           | 17.1   | 16.2 - 17.9 | 93.2                 | 92.6 - 93.8 | 87.9   | 86.9 - 89.0 | 66.9   | 63.2 - 70.6 | 43.8   | 41.1 - 46.4 | 91.2     | 90.5 - 92.0 |
|                                    | 2010-2014           | 19.2   | 18.3 - 20.1 | 93.6                 | 93.0 - 94.2 | 89.3   | 88.2 - 90.3 | 65.9   | 62.4 - 69.4 | 43.9   | 41.5 - 46.4 | 91.7     | 90.9 - 92.4 |
| South Australia                    | 2000-2004           | 13.6   | 12.2 - 15.0 | 92.9                 | 91.6 - 94.2 | 87.1   | 85.4 - 88.7 | 60.9   | 54.4 - 67.5 | 35.3   | 31.1 - 39.6 | 90.6     | 89.2 - 92.0 |
|                                    | 2005-2009           | 15.0   | 13.6 - 16.3 | 91.7                 | 90.4 - 93.0 | 88.5   | 86.9 - 90.1 | 64.1   | 57.6 - 70.6 | 37.5   | 33.5 - 41.5 | 95.6     | 94.6 - 96.7 |
|                                    | 2010-2014           | 16.7   | 15.1 - 18.3 | 91.3                 | 89.8 - 92.8 | 89.3   | 87.6 - 91.0 | 70.7   | 63.7 - 77.8 | 42.1   | 37.2 - 46.9 | 97.2     | 96.1 - 98.4 |
| Tasmania                           | 2000-2004           | 12.0   | 9.9 - 14.1  | 90.9                 | 88.5 - 93.4 | 87.1   | 83.9 - 90.3 | 57.7   | 49.2 - 66.2 | 31.5   | 24.6 - 38.5 | 83.3     | 80.3 - 86.2 |
|                                    | 2005-2009           | 11.3   | 9.4 - 13.3  | 92.6                 | 90.5 - 94.7 | 88.1   | 84.9 - 91.2 | 72.4   | 63.5 - 81.2 | 33.6   | 26.9 - 40.4 | 95.5     | 93.5 - 97.5 |
|                                    | 2010-2014           | 13.4   | 10.9 - 15.9 | 92.5                 | 90.3 - 94.7 | 90.6   | 87.3 - 94.0 | 68.2   | 56.3 - 80.2 | 38.3   | 30.5 - 46.2 | 95.0     | 93.0 - 97.1 |
| Victoria                           | 2000-2004           | 14.4   | 13.6 - 15.2 | 91.2                 | 90.4 - 92.0 | 86.7   | 85.7 - 87.7 | 69.2   | 65.5 - 72.9 | 35.1   | 32.8 - 37.4 | 86.5     | 85.6 - 87.3 |
|                                    | 2005-2009           | 17.5   | 16.7 - 18.4 | 91.0                 | 90.3 - 91.7 | 88.3   | 87.3 - 89.2 | 69.5   | 65.8 - 73.2 | 39.9   | 37.6 - 42.1 | 92.5     | 91.9 - 93.1 |
|                                    | 2010-2014           | 20.8   | 19.9 - 21.7 | 91.3                 | 90.6 - 92.0 | 88.8   | 87.9 - 89.8 | 67.2   | 63.6 - 70.7 | 40.7   | 38.5 - 43.0 | 93.9     | 93.3 - 94.5 |
| Western Australia                  | 2000-2004           | 14.2   | 13.0 - 15.5 | 92.9                 | 91.8 - 94.0 | 88.2   | 86.5 - 89.9 | 67.3   | 62.4 - 72.2 | 34.9   | 30.9 - 38.8 | 89.4     | 88.1 - 90.7 |
|                                    | 2005-2009           | 17.3   | 16.0 - 18.6 | 93.7                 | 92.7 - 94.7 | 88.7   | 87.2 - 90.3 | 67.2   | 61.7 - 72.7 | 43.5   | 39.4 - 47.6 | 92.9     | 91.9 - 94.0 |
|                                    | 2010-2014           | 20.4   | 19.0 - 21.8 | 93.2                 | 92.1 - 94.2 | 89.4   | 87.9 - 90.8 | 64.5   | 59.2 - 69.8 | 44.6   | 40.6 - 48.7 | 94.9     | 93.8 - 95.9 |
| New Zealand *                      | 2000-2004           | 11.4   | 10.5 - 12.2 | 90.0                 | 89.1 - 90.8 | 82.8   | 81.6 - 84.1 | 67.4   | 63.8 - 71.1 | 38.7   | 36.0 - 41.4 | 89.1     | 88.1 - 90.0 |
|                                    | 2005-2009           | 12.4   | 11.6 - 13.3 | 91.1                 | 90.3 - 91.8 | 86.1   | 84.9 - 87.3 | 64.4   | 60.4 - 68.4 | 33.4   | 31.0 - 35.9 | 89.3     | 88.4 - 90.2 |
|                                    | 2010-2014           | 15.3   | 14.3 - 16.2 | 91.8                 | 91.1 - 92.5 | 87.6   | 86.4 - 88.7 | 67.4   | 63.4 - 71.5 | 36.7   | 34.1 - 39.3 | 90.3     | 89.4 - 91.1 |

**Web-table 4.3: Age-standardised five-year net survival (NS, %): adults (15-99 years) and children (0-14 years) diagnosed with brain tumours, adults with myeloid or lymphoid malignancies, and children with acute lymphoblastic leukaemia or lymphoma, by continent, country, registry and calendar period of diagnosis (2000-2004, 2005-2009, 2010-2014)**

|                             | Period of diagnosis | Brain (adults) |              | Brain (children) |              | Myeloid (adults) |             | Lymphoid (adults) |              | ALL (children) |               | Lymphoma (children) |              |
|-----------------------------|---------------------|----------------|--------------|------------------|--------------|------------------|-------------|-------------------|--------------|----------------|---------------|---------------------|--------------|
|                             |                     | NS (%)         | 95% CI       | NS (%)           | 95% CI       | NS (%)           | 95% CI      | NS (%)            | 95% CI       | NS (%)         | 95% CI        | NS (%)              | 95% CI       |
| AFRICA                      |                     |                |              |                  |              |                  |             |                   |              |                |               |                     |              |
| Algeria<br>(3 registries)   | 2000-2004           |                | -            |                  | -            | 21.1 §           | 6.0 - 36.2  | 23.3 §            | 13.8 - 32.8  | 30.9 §         | 10.1 - 51.6   | 6.0 §               | 0.0 - 15.1   |
|                             | 2005-2009           | 51.9 §         | 43.4 - 60.4  | 43.3 §           | 29.4 - 57.2  | 17.1 §           | 0.1 - 34.1  | 47.8 §            | 39.9 - 55.8  | 100.0 §        | 100.0 - 100.0 | 78.9 §              | 62.5 - 95.3  |
|                             | 2010-2014           | 46.5 §         | 37.5 - 55.5  | 54.1 §           | 39.2 - 69.0  | 17.9 §           | 5.3 - 30.6  | 59.1 §            | 49.9 - 68.3  |                | -             | 77.5 §              | 65.4 - 89.7  |
| Annaba                      | 2000-2004           |                | -            |                  | -            | 21.1 §           | 6.0 - 36.2  | 61.5 §            | 46.6 - 76.4  | 33.5 §         | 9.8 - 57.2    | 70.0 §              | 46.1 - 93.8  |
|                             | 2005-2009           |                | -            |                  | -            | 17.1 §           | 0.1 - 34.1  | 40.4 §            | 25.7 - 55.1  | 100.0 §        | 100.0 - 100.0 | 87.9 §              | 66.3 - 100.0 |
|                             | 2010-2014           |                | -            |                  | -            | 10.5 §           | 0.0 - 24.5  | 33.9 §            | 30.2 - 37.6  |                | -             |                     | -            |
| Sétif                       | 2000-2004           |                | -            |                  | -            |                  | -           | 1.6 §             | 0.0 - 3.9    |                | -             | 0.0 §               | 0.0 - 0.0    |
|                             | 2005-2009           |                | -            | 6.3 §            | 0.0 - 15.4   |                  | -           |                   | -            |                | -             |                     | -            |
|                             | 2010-2014           | 4.5 §          | 0.0 - 9.9    |                  | -            | 0.0 §            | 0.0 - 0.0   | 9.3 §             | 2.7 - 16.0   |                | -             |                     | -            |
| Tlemcen                     | 2000-2004           |                | -            |                  | -            |                  | -           |                   | -            |                | -             |                     | -            |
|                             | 2005-2009           | 68.5 §         | 59.4 - 77.5  | 79.0 §           | 61.2 - 96.8  |                  | -           | 71.7 §            | 61.3 - 82.1  |                | -             | 79.1 §              | 61.2 - 96.9  |
|                             | 2010-2014           | 65.4 §         | 53.9 - 76.9  | 69.9 §           | 53.2 - 86.7  |                  | -           | 79.1 §            | 66.0 - 92.2  |                | -             | 77.6 §              | 64.1 - 91.2  |
| Mali (Bamako)               | 2000-2004           |                | -            |                  | -            |                  | -           |                   | -            |                | -             |                     | -            |
|                             | 2005-2009           |                | -            |                  | -            |                  | -           |                   | -            |                | -             |                     | -            |
|                             | 2010-2014           |                | -            |                  | -            |                  | -           |                   | -            |                | -             |                     | -            |
| Mauritius *                 | 2000-2004           |                | -            |                  | -            |                  | -           |                   | -            |                | -             |                     | -            |
|                             | 2005-2009           |                | -            |                  | -            |                  | -           |                   | -            |                | -             |                     | -            |
|                             | 2010-2014           | 43.7           | 25.5 - 61.9  |                  | -            | 50.1             | 34.4 - 65.8 | 65.9              | 53.4 - 78.4  |                | -             |                     | -            |
| Morocco (Casablanca)        | 2000-2004           |                | -            |                  | -            |                  | -           |                   | -            |                | -             |                     | -            |
|                             | 2005-2009           |                | -            |                  | -            |                  | -           |                   | -            |                | -             |                     | -            |
|                             | 2010-2014           |                | -            |                  | -            |                  | -           |                   | -            |                | -             |                     | -            |
| Nigeria (Ibadan)            | 2000-2004           |                | -            |                  | -            |                  | -           |                   | -            |                | -             |                     | -            |
|                             | 2005-2009           | 88.6 §         | 60.4 - 100.0 |                  | -            | 57.4 §           | 29.0 - 85.8 | 86.8 §            | 54.9 - 100.0 |                | -             | 51.0 §              | 31.5 - 70.6  |
|                             | 2010-2014           | 54.9 §         | 19.7 - 90.0  |                  | -            | 28.4 §           | 3.0 - 53.7  | 56.4 §            | 32.2 - 80.5  |                | -             | 6.0 §               | 0.0 - 13.6   |
| South Africa (Eastern Cape) | 2000-2004           |                | -            |                  | -            |                  | -           |                   | -            |                | -             |                     | -            |
|                             | 2005-2009           |                | -            |                  | -            |                  | -           | 29.5 §            | 10.8 - 48.2  |                | -             |                     | -            |
|                             | 2010-2014           | 51.6 §         | 0.6 - 100.0  |                  | -            |                  | -           | 47.7 §            | 31.1 - 64.4  |                | -             |                     | -            |
| AMERICA (CENTRAL AND SOUTH) |                     |                |              |                  |              |                  |             |                   |              |                |               |                     |              |
| Argentina<br>(5 registries) | 2000-2004           | 29.8 §         | 22.6 - 37.0  | 45.1             | 41.8 - 48.3  | 47.9             | 39.4 - 56.3 | 54.5              | 49.1 - 59.8  | 65.0           | 62.7 - 67.3   | 79.9                | 76.7 - 83.0  |
|                             | 2005-2009           | 27.7 §         | 24.4 - 31.0  | 56.1             | 52.9 - 59.3  | 39.5             | 34.5 - 44.6 | 48.8              | 45.9 - 51.6  | 72.0           | 69.7 - 74.2   | 76.9                | 73.5 - 80.3  |
|                             | 2010-2014           | 30.7 §         | 26.8 - 34.6  | 62.9 §           | 59.4 - 66.4  | 37.4             | 32.1 - 42.6 | 48.2              | 45.0 - 51.5  | 76.1 §         | 73.7 - 78.4   | 83.4                | 80.1 - 86.6  |
| Chubut                      | 2000-2004           |                | -            |                  | -            |                  | -           |                   | -            |                | -             |                     | -            |
|                             | 2005-2009           | 0.1 §          | 0.0 - 0.2    |                  | -            |                  | -           | 9.2 §             | 0.2 - 18.1   |                | -             |                     | -            |
|                             | 2010-2014           | 8.1 §          | 0.0 - 17.5   |                  | -            | 0.1 §            | 0.0 - 0.3   | 11.3 §            | 3.9 - 18.7   |                | -             |                     | -            |
| Córdoba                     | 2000-2004           | 24.8 §         | 13.6 - 36.1  |                  | -            | 35.9 §           | 22.1 - 49.7 | 57.6              | 47.4 - 67.8  |                | -             |                     | -            |
|                             | 2005-2009           | 28.1 §         | 23.5 - 32.7  |                  | -            | 38.8 §           | 30.4 - 47.2 | 48.2              | 44.1 - 52.3  |                | -             |                     | -            |
|                             | 2010-2014           | 30.8 §         | 25.5 - 36.2  |                  | -            | 42.4 §           | 31.9 - 52.9 | 48.7              | 43.0 - 54.4  |                | -             |                     | -            |
| Mendoza                     | 2000-2004           | 34.7 §         | 24.8 - 44.6  |                  | -            | 47.9             | 39.4 - 56.3 | 53.1              | 47.1 - 59.1  |                | -             |                     | -            |
|                             | 2005-2009           | 27.5 §         | 22.9 - 32.0  |                  | -            | 39.5             | 34.5 - 44.6 | 48.6              | 44.9 - 52.4  |                | -             |                     | -            |
|                             | 2010-2014           | 30.3 §         | 24.8 - 35.7  |                  | -            | 37.4             | 32.1 - 42.6 | 47.3              | 43.1 - 51.4  |                | -             |                     | -            |
| Tierra del Fuego            | 2000-2004           |                | -            |                  | -            |                  | -           |                   | -            |                | -             |                     | -            |
|                             | 2005-2009           |                | -            |                  | -            |                  | -           |                   | -            |                | -             |                     | -            |
|                             | 2010-2014           |                | -            |                  | -            |                  | -           |                   | -            |                | -             |                     | -            |
| Argentina Childhood †       | 2000-2004           |                | -            | 45.1             | 41.8 - 48.3  |                  | -           |                   | -            | 65.0           | 62.7 - 67.3   | 79.9                | 76.7 - 83.0  |
|                             | 2005-2009           |                | -            | 56.1             | 52.9 - 59.3  |                  | -           |                   | -            | 72.0           | 69.7 - 74.2   | 76.9                | 73.5 - 80.3  |
|                             | 2010-2014           |                | -            | 62.9 §           | 59.4 - 66.4  |                  | -           |                   | -            | 76.1 §         | 73.7 - 78.4   | 83.4                | 80.1 - 86.6  |
| Brazil<br>(6 registries)    | 2000-2004           | 31.3 §         | 26.2 - 36.4  | 55.7             | 44.7 - 66.6  | 31.1             | 7.3 - 54.9  | 48.2              | 43.7 - 52.6  | 67.7           | 57.8 - 77.6   | 69.2                | 57.3 - 81.1  |
|                             | 2005-2009           | 28.2 §         | 24.4 - 32.1  | 34.7             | 21.9 - 47.5  | 41.6             | 31.4 - 51.8 | 49.4              | 45.6 - 53.2  | 69.8           | 60.0 - 79.6   | 86.3                | 77.1 - 95.5  |
|                             | 2010-2014           | 28.1 §         | 23.7 - 32.6  | 28.9             | 15.8 - 41.9  | 39.1             | 28.7 - 49.5 | 46.2              | 42.2 - 50.2  | 66.0           | 53.3 - 78.8   | 88.2                | 78.2 - 98.3  |
| Aracaju                     | 2000-2004           | 30.4 §         | 18.2 - 42.5  | 42.9             | 22.6 - 63.2  | 32.1 §           | 17.2 - 47.1 | 43.9              | 34.7 - 53.1  | 58.5           | 32.1 - 85.0   | 54.0                | 28.3 - 79.7  |
|                             | 2005-2009           | 28.6 §         | 20.1 - 37.1  | 7.7              | 0.0 - 19.2   | 42.3             | 28.7 - 55.9 | 45.9              | 37.1 - 54.8  | 69.7           | 51.3 - 88.0   | 80.3                | 56.8 - 100.0 |
|                             | 2010-2014           | 32.7 §         | 18.3 - 47.2  |                  | -            | 33.0             | 19.6 - 46.3 | 44.7              | 35.0 - 54.4  |                | -             |                     | -            |
| Cuiabá                      | 2000-2004           |                | -            |                  | -            |                  | -           |                   | -            |                | -             |                     | -            |
|                             | 2005-2009           |                | -            |                  | -            |                  | -           |                   | -            |                | -             |                     | -            |
|                             | 2010-2014           |                | -            |                  | -            |                  | -           |                   | -            |                | -             |                     | -            |
| Curitiba                    | 2000-2004           | 35.1 §         | 29.0 - 41.2  | 63.1             | 50.5 - 75.8  | 21.8 §           | 12.8 - 30.9 | 50.7              | 45.3 - 56.1  | 68.7           | 58.2 - 79.2   | 74.2                | 61.5 - 86.9  |
|                             | 2005-2009           | 29.0 §         | 24.5 - 33.6  | 44.0             | 28.6 - 59.4  | 32.1 §           | 25.5 - 38.6 | 50.6              | 46.3 - 55.0  | 74.4           | 63.6 - 85.3   | 85.0                | 73.4 - 96.6  |
|                             | 2010-2014           | 27.1 §         | 21.8 - 32.4  | 34.3             | 19.5 - 49.1  | 34.8 §           | 25.2 - 44.4 | 45.7              | 40.6 - 50.7  | 74.2           | 60.3 - 88.2   | 93.2                | 86.6 - 99.9  |
| Goiânia                     | 2000-2004           |                | -            |                  | -            |                  | -           |                   | -            |                | -             |                     | -            |
|                             | 2005-2009           |                | -            |                  | -            |                  | -           |                   | -            |                | -             |                     | -            |
|                             | 2010-2014           |                | -            |                  | -            |                  | -           |                   | -            |                | -             |                     | -            |
| Jaú                         | 2000-2004           | 5.4 §          | 0.0 - 13.7   |                  | -            | 31.1             | 7.3 - 54.9  | 43.9              | 33.4 - 54.5  |                | -             |                     | -            |
|                             | 2005-2009           | 19.7           | 5.7 - 33.6   |                  | -            | 41.6             | 27.4 - 55.9 | 47.7              | 33.8 - 61.5  |                | -             |                     | -            |
|                             | 2010-2014           | 13.8           | 0.0 - 28.3   |                  | -            | 41.1             | 25.1 - 57.1 | 56.7              | 39.7 - 73.6  |                | -             |                     | -            |
| São Paulo                   | 2000-2004           |                | -            |                  | -            |                  | -           |                   | -            |                | -             |                     | -            |
|                             | 2005-2009           |                | -            |                  | -            |                  | -           |                   | -            |                | -             |                     | -            |
|                             | 2010-2014           |                | -            |                  | -            |                  | -           |                   | -            |                | -             |                     | -            |
| Chile<br>(4 registries)     | 2000-2004           | 12.4           | 0.0 - 26.7   | 46.7             | 22.7 - 70.7  | 29.1             | 19.1 - 39.1 | 28.9              | 23.4 - 34.3  | 76.7           | 65.6 - 87.7   | 70.1                | 43.3 - 96.9  |
|                             | 2005-2009           | 21.8           | 14.3 - 29.3  | 56.7             | 37.0 - 76.4  | 25.8             | 20.8 - 30.8 | 37.1              | 33.7 - 40.5  | 67.4           | 57.3 - 77.4   | 69.7                | 51.4 - 88.0  |
|                             | 2010-2014           | 24.2           | 15.2 - 33.2  |                  | -            | 16.5             | 11.4 - 21.6 | 32.5              | 23.8 - 41.2  | 63.9           | 48.5 - 79.3   |                     | -            |
| Antofagasta                 | 2000-2004           |                | -            |                  | -            | 27.5             | 9.0 - 46.0  | 21.0              | 11.6 - 30.4  |                | -             |                     | -            |
|                             | 2005-2009           | 24.9 §         | 10.5 - 39.4  | 38.6             | 13.9 - 63.4  | 13.6             | 6.6 - 20.6  | 31.3              | 23.5 - 39.2  | 91.4           | 80.1 - 100.0  | 54.6                | 27.0 - 82.2  |
|                             | 2010-2014           | 6.0 §          | 0.0 - 15.1   |                  | -            |                  | -           | 19.3              | 9.8 - 28.9   |                | -             |                     | -            |
| Biobio                      | 2000-2004           | 12.4           | 0.0 - 26.7   |                  | -            | 37.9             | 17.5 - 58.2 | 34.0              | 21.6 - 46.4  | 80.1           | 56.6 - 100.0  |                     | -            |
|                             | 2005-2009           | 18.4           | 9.8 - 27.0   | 19.1 §           | 0.0 - 39.5   | 31.2             | 19.6 - 42.8 | 32.5              | 25.9 - 39.0  | 71.3           | 50.5 - 92.0   |                     | -            |
|                             | 2010-2014           | 19.8           | 11.8 - 27.8  |                  | -            | 25.3             | 14.7 - 35.8 | 29.7 §            | 21.7 - 37.7  | 61.9 §         | 41.1 - 82.7   |                     | -            |
| Concepción                  | 2000-2004           |                | -            |                  | -            |                  | -           |                   | -            |                | -             |                     | -            |
|                             | 2005-2009           | 29.5 §         | 22.5 - 36.5  | 70.7 §           | 49.7 - 91.6  | 23.5             | 16.1 - 30.9 | 39.7              | 34.4 - 45.0  | 57.9           | 45.8 - 69.9   | 79.8 §              | 62.5 - 97.2  |
|                             | 2010-2014           | 20.4 §         | 7.4 - 33.4   |                  | -            | 14.0             | 0.8 - 27.2  | 51.2 §            | 39.7 - 62.8  |                | -             |                     | -            |
| Los Rios                    | 2000-2004           | 12.6 §         | 1.7 - 23.4   |                  | -            | 16.7             | 4.4 - 29.0  | 28.9              | 22.3 - 35.5  | 61.2           | 39.4 - 82.9   |                     | -            |
|                             | 2005-2009           | 27.8           | 14.4 - 41.1  | 80.1             | 56.6 - 100.0 | 32.7             | 22.2 - 43.3 | 40.2              | 32.3 - 48.1  | 64.3           | 42.1 - 86.5   |                     | -            |
|                             | 2010-2014           | 16.5 §         | 5.1 - 28.0   |                  | -            | 32.2 §           | 19.0 - 45.4 | 47.6 §            | 37.8 - 57.4  | 82.7           | 61.9 - 100.0  |                     | -            |

**Web-table 4.3: Age-standardised five-year net survival (NS, %): adults (15-99 years) and children (0-14 years) diagnosed with brain tumours, adults with myeloid or lymphoid malignancies, and children with acute lymphoblastic leukaemia or lymphoma, by continent, country, registry and calendar period of diagnosis (2000-2004, 2005-2009, 2010-2014)**

|                            | Period of diagnosis | Brain (adults) |             | Brain (children) |             | Myeloid (adults) |             | Lymphoid (adults) |             | ALL (children) |              | Lymphoma (children) |               |
|----------------------------|---------------------|----------------|-------------|------------------|-------------|------------------|-------------|-------------------|-------------|----------------|--------------|---------------------|---------------|
|                            |                     | NS (%)         | 95% CI      | NS (%)           | 95% CI      | NS (%)           | 95% CI      | NS (%)            | 95% CI      | NS (%)         | 95% CI       | NS (%)              | 95% CI        |
| Colombia<br>(4 registries) | 2000-2004           | 23.8           | 20.1 - 27.5 | 44.9 §           | 32.9 - 57.0 | 16.3             | 11.4 - 21.2 | 37.2              | 33.4 - 40.9 | 52.3           | 43.5 - 61.2  | 68.4 §              | 55.3 - 81.6   |
|                            | 2005-2009           | 27.4           | 23.5 - 31.4 | 33.9 §           | 23.4 - 44.5 | 30.7             | 25.7 - 35.7 | 42.3              | 39.2 - 45.4 | 57.3           | 47.8 - 66.9  | 85.0 §              | 76.1 - 93.9   |
|                            | 2010-2014           | 20.8 §         | 17.1 - 24.4 | 46.9 §           | 35.9 - 57.9 | 31.8 §           | 26.6 - 37.1 | 40.3 §            | 37.0 - 43.6 | 68.9           | 51.6 - 86.3  | -                   | -             |
| Bucaramanga                | 2000-2004           | -              | -           | -                | -           | -                | -           | -                 | -           | -              | -            | -                   | -             |
|                            | 2005-2009           | -              | -           | -                | -           | -                | -           | -                 | -           | -              | -            | -                   | -             |
|                            | 2010-2014           | -              | -           | -                | -           | -                | -           | -                 | -           | -              | -            | -                   | -             |
| Cali                       | 2000-2004           | 23.8           | 20.1 - 27.5 | 45.7 §           | 33.5 - 57.9 | 16.3             | 11.4 - 21.2 | 37.9              | 33.9 - 42.0 | 52.3           | 43.5 - 61.2  | 69.7 §              | 56.2 - 83.3   |
|                            | 2005-2009           | 27.2           | 23.0 - 31.4 | 38.6 §           | 26.3 - 50.9 | 29.9             | 24.8 - 34.9 | 42.2              | 38.9 - 45.5 | 53.9 §         | 43.6 - 64.1  | 86.1 §              | 75.4 - 96.7   |
|                            | 2010-2014           | 19.6 §         | 15.6 - 23.5 | 52.8 §           | 41.2 - 64.4 | 30.0 §           | 24.7 - 35.4 | 39.7 §            | 36.2 - 43.1 | -              | -            | -                   | -             |
| Manizales                  | 2000-2004           | 47.4 §         | 11.5 - 83.3 | -                | -           | 47.5 §           | 13.4 - 81.5 | 58.1 §            | 42.2 - 74.0 | -              | -            | -                   | -             |
|                            | 2005-2009           | 30.0 §         | 10.6 - 49.4 | -                | -           | 63.3 §           | 36.5 - 90.1 | 47.5 §            | 35.9 - 59.1 | 40.3 §         | 0.0 - 80.9   | 60.1 §              | 25.8 - 94.5   |
|                            | 2010-2014           | 48.6 §         | 24.7 - 72.6 | -                | -           | 57.7 §           | 18.8 - 96.6 | 52.2 §            | 37.0 - 67.4 | -              | -            | -                   | -             |
| Pasto                      | 2000-2004           | 24.9 §         | 11.7 - 38.0 | -                | -           | 35.8 §           | 16.7 - 54.9 | 32.9              | 23.9 - 42.0 | 85.8 §         | 68.1 - 100.0 | -                   | -             |
|                            | 2005-2009           | 34.5           | 21.9 - 47.1 | 10.1 §           | 0.0 - 24.7  | 35.4             | 18.8 - 52.0 | 41.8              | 34.6 - 48.9 | 68.9           | 47.0 - 90.8  | -                   | -             |
|                            | 2010-2014           | 26.4 §         | 12.8 - 40.1 | 40.1 §           | 12.0 - 68.2 | 41.8 §           | 21.9 - 61.8 | 43.0 §            | 32.7 - 53.3 | 85.2           | 71.7 - 98.7  | -                   | -             |
| Costa Rica *               | 2000-2004           | 30.8 §         | 24.9 - 36.7 | 77.1             | 55.1 - 99.0 | 35.0             | 25.4 - 44.6 | 50.0              | 45.2 - 54.8 | 97.8           | 93.2 - 100.0 | -                   | -             |
|                            | 2005-2009           | 18.9 §         | 15.1 - 22.8 | 71.2             | 61.2 - 81.3 | 21.2             | 15.7 - 26.7 | 50.4              | 46.9 - 53.9 | 87.4           | 82.8 - 91.9  | 93.0                | 86.7 - 99.3   |
|                            | 2010-2014           | 21.5 §         | 17.5 - 25.6 | 69.8             | 57.8 - 81.8 | 29.4             | 23.3 - 35.4 | 52.4              | 49.1 - 55.7 | 80.0           | 69.3 - 90.7  | 93.5                | 86.2 - 100.0  |
| Cuba *                     | 2000-2004           | -              | -           | -                | -           | -                | -           | 44.0 §            | 41.6 - 46.5 | -              | -            | 72.4 §              | 67.1 - 77.8   |
|                            | 2005-2009           | -              | -           | -                | -           | -                | -           | 49.4 §            | 46.7 - 52.0 | -              | -            | 77.4 §              | 71.5 - 83.3   |
|                            | 2010-2014           | -              | -           | -                | -           | -                | -           | 60.1 §            | 56.3 - 63.8 | -              | -            | 78.5 §              | 70.5 - 86.6   |
| Ecuador<br>(5 registries)  | 2000-2004           | 24.2           | 19.4 - 28.9 | 48.0 §           | 35.2 - 60.8 | 20.5             | 12.6 - 28.4 | 33.1              | 29.1 - 37.0 | 48.3 §         | 40.3 - 56.4  | 73.4 §              | 62.7 - 84.1   |
|                            | 2005-2009           | 20.9           | 17.6 - 24.2 | 31.2             | 20.9 - 41.5 | 20.3             | 15.5 - 25.0 | 39.4              | 36.7 - 42.0 | 51.5           | 44.9 - 58.0  | 72.2                | 63.7 - 80.7   |
|                            | 2010-2014           | 25.8           | 22.0 - 29.6 | 48.2             | 35.9 - 60.5 | 24.4             | 18.9 - 29.9 | 40.1              | 37.4 - 42.8 | 49.8           | 42.7 - 56.9  | 67.3                | 57.4 - 77.2   |
| Cuenca                     | 2000-2004           | 15.2 §         | 1.4 - 29.1  | -                | -           | 4.2 §            | 0.0 - 10.8  | 18.5 §            | 11.1 - 26.0 | 58.6 §         | 33.9 - 83.2  | -                   | -             |
|                            | 2005-2009           | 0.0 §          | 0.0 - 0.0   | 44.1 §           | 16.0 - 72.1 | 12.5 §           | 0.2 - 24.8  | 15.1 §            | 8.1 - 22.1  | 47.4           | 26.5 - 68.2  | -                   | -             |
|                            | 2010-2014           | 14.4 §         | 0.0 - 33.0  | -                | -           | 15.4 §           | 0.0 - 31.3  | 22.3 §            | 15.7 - 29.0 | 48.4           | 27.4 - 69.4  | -                   | -             |
| Guayaquil                  | 2000-2004           | -              | -           | -                | -           | -                | -           | -                 | -           | -              | -            | -                   | -             |
|                            | 2005-2009           | 20.3           | 15.6 - 25.0 | 31.3             | 20.7 - 41.8 | 16.6             | 10.3 - 22.9 | 35.4              | 31.2 - 39.7 | 54.1           | 46.4 - 61.8  | 73.0                | 63.3 - 82.7   |
|                            | 2010-2014           | 23.5           | 18.7 - 28.3 | 47.8             | 35.4 - 60.2 | 25.7             | 19.2 - 32.1 | 35.8              | 31.6 - 40.0 | 49.6           | 41.8 - 57.4  | 70.6                | 59.2 - 82.0   |
| Loja                       | 2000-2004           | 9.8            | 0.2 - 19.4  | -                | -           | 20.0 §           | 5.2 - 34.7  | 31.9              | 22.3 - 41.6 | 33.5 §         | 11.1 - 56.0  | -                   | -             |
|                            | 2005-2009           | 15.7           | 5.4 - 26.1  | -                | -           | 34.5 §           | 21.1 - 47.9 | 31.3              | 22.3 - 40.4 | -              | -            | -                   | -             |
|                            | 2010-2014           | 21.7           | 6.3 - 37.1  | -                | -           | 20.8 §           | 9.7 - 32.0  | 35.0              | 26.4 - 43.5 | 86.9           | 70.3 - 100.0 | -                   | -             |
| Manabí                     | 2000-2004           | 20.5           | 4.1 - 36.9  | -                | -           | 21.2 §           | 6.9 - 35.6  | 25.3 §            | 17.0 - 33.6 | 45.2 §         | 33.1 - 57.2  | 82.4 §              | 64.9 - 100.0  |
|                            | 2005-2009           | 27.6 §         | 14.6 - 40.5 | 70.4 §           | 46.9 - 94.0 | 34.8             | 19.5 - 50.2 | 31.3              | 25.4 - 37.3 | 46.4           | 32.4 - 60.4  | 67.3                | 47.8 - 86.8   |
|                            | 2010-2014           | 18.8 §         | 9.0 - 28.7  | 32.8 §           | 18.1 - 47.6 | 32.1 §           | 20.2 - 44.0 | 38.2              | 31.4 - 45.0 | 48.3 §         | 33.1 - 63.6  | 56.9                | 40.1 - 73.7   |
| Quito                      | 2000-2004           | 27.5           | 22.2 - 32.7 | 39.8 §           | 21.1 - 58.4 | 20.5             | 12.6 - 28.4 | 33.4              | 29.2 - 37.6 | 52.8 §         | 41.8 - 63.7  | 70.1 §              | 55.5 - 84.7   |
|                            | 2005-2009           | 22.9           | 17.8 - 27.9 | 32.7 §           | 20.4 - 45.0 | 21.8             | 15.5 - 28.2 | 45.5              | 41.2 - 49.8 | 56.4 §         | 45.5 - 67.2  | 75.5 §              | 62.4 - 88.5   |
|                            | 2010-2014           | 29.3           | 23.1 - 35.6 | 35.2 §           | 20.8 - 49.6 | 24.3             | 16.6 - 32.1 | 45.4              | 41.0 - 49.8 | 53.1 §         | 43.1 - 63.0  | 65.3 §              | 50.1 - 80.6   |
| Guadeloupe *               | 2000-2004           | -              | -           | -                | -           | -                | -           | -                 | -           | -              | -            | -                   | -             |
|                            | 2005-2009           | 0.2 §          | 0.0 - 0.6   | -                | -           | 37.5 §           | 9.8 - 65.3  | 25.7 §            | 17.3 - 34.0 | -              | -            | -                   | -             |
|                            | 2010-2014           | 9.6 §          | 0.0 - 19.5  | -                | -           | 32.3 §           | 21.4 - 43.2 | 36.0 §            | 27.3 - 44.6 | -              | -            | -                   | -             |
| Martinique *               | 2000-2004           | 32.6           | 22.4 - 42.8 | -                | -           | 46.2             | 36.8 - 55.6 | 49.8              | 44.1 - 55.5 | 77.5           | 55.9 - 99.2  | -                   | -             |
|                            | 2005-2009           | 28.1           | 19.9 - 36.2 | -                | -           | 49.7             | 41.8 - 57.6 | 48.7              | 43.9 - 53.6 | -              | -            | -                   | -             |
|                            | 2010-2014           | 35.8           | 26.4 - 45.3 | -                | -           | 47.9             | 39.4 - 56.5 | 49.4              | 43.3 - 55.4 | -              | -            | -                   | -             |
| Mexico (Childhood) †       | 2000-2004           | -              | -           | -                | -           | -                | -           | -                 | -           | -              | -            | -                   | -             |
|                            | 2005-2009           | -              | -           | 41.2             | 35.1 - 47.4 | -                | -           | -                 | -           | 52.5           | 49.8 - 55.2  | 75.1 §              | 70.7 - 79.5   |
|                            | 2010-2014           | -              | -           | 36.5             | 30.0 - 43.0 | -                | -           | -                 | -           | 52.7           | 49.4 - 56.1  | 72.0 §              | 66.4 - 77.7   |
| Peru (Lima)                | 2000-2004           | -              | -           | -                | -           | -                | -           | -                 | -           | -              | -            | -                   | -             |
|                            | 2005-2009           | -              | -           | -                | -           | -                | -           | -                 | -           | -              | -            | -                   | -             |
|                            | 2010-2014           | -              | -           | -                | -           | 36.3 §           | 29.5 - 43.0 | 46.2 §            | 42.9 - 49.6 | 60.4           | 53.4 - 67.3  | 73.4 §              | 64.8 - 82.1   |
| Puerto Rico *              | 2000-2004           | 31.7 §         | 28.0 - 35.4 | 71.2             | 62.1 - 80.3 | 25.6 §           | 21.4 - 29.8 | 49.1              | 46.8 - 51.4 | 79.3           | 70.2 - 88.4  | 94.5                | 90.1 - 98.8   |
|                            | 2005-2009           | 34.8           | 31.5 - 38.0 | 76.1             | 67.6 - 84.6 | 38.8             | 35.6 - 42.0 | 53.5              | 51.6 - 55.4 | 86.2           | 78.1 - 94.4  | 90.9                | 83.1 - 98.7   |
|                            | 2010-2014           | 36.3           | 31.2 - 41.4 | 70.5             | 56.3 - 84.7 | 44.9             | 39.6 - 50.1 | 60.3              | 57.2 - 63.4 | 93.1           | 83.6 - 100.0 | 96.3                | 89.9 - 100.0  |
| Uruguay *                  | 2000-2004           | -              | -           | -                | -           | -                | -           | -                 | -           | -              | -            | -                   | -             |
|                            | 2005-2009           | -              | -           | -                | -           | -                | -           | -                 | -           | -              | -            | -                   | -             |
|                            | 2010-2014           | -              | -           | -                | -           | -                | -           | -                 | -           | -              | -            | -                   | -             |
| AMERICA (NORTH)            |                     |                |             |                  |             |                  |             |                   |             |                |              |                     |               |
| Canada<br>(9 registries)   | 2000-2004           | 24.7           | 23.4 - 26.0 | 73.3             | 68.2 - 78.4 | 47.5             | 46.1 - 48.8 | 60.1              | 59.5 - 60.7 | 91.0           | 88.8 - 93.3  | 89.4                | 85.9 - 92.9   |
|                            | 2005-2009           | 29.8           | 28.5 - 31.1 | 72.5             | 67.7 - 77.2 | 49.2             | 47.9 - 50.5 | 66.0              | 65.4 - 66.5 | 92.1           | 90.0 - 94.3  | 88.5                | 84.4 - 92.5   |
|                            | 2010-2014           | 29.9           | 28.6 - 31.1 | 72.7             | 68.0 - 77.4 | 50.4             | 49.2 - 51.6 | 68.6              | 68.1 - 69.1 | 92.6           | 90.7 - 94.6  | 92.3                | 89.1 - 95.6   |
| Alberta                    | 2000-2004           | 23.2           | 20.8 - 25.6 | 78.5             | 70.1 - 86.8 | 49.8             | 47.1 - 52.5 | 60.9              | 59.2 - 62.5 | 89.4           | 83.4 - 95.3  | 91.6                | 83.5 - 99.8   |
|                            | 2005-2009           | 30.4           | 28.0 - 32.7 | 72.3             | 63.7 - 80.9 | 51.8             | 49.3 - 54.3 | 68.7              | 67.2 - 70.1 | 92.2           | 87.1 - 97.2  | 87.8                | 78.4 - 97.2   |
|                            | 2010-2014           | 29.8           | 27.5 - 32.2 | 74.1             | 66.1 - 82.1 | 53.8             | 51.4 - 56.2 | 72.3              | 70.9 - 73.7 | 97.1           | 94.5 - 99.7  | 89.1                | 81.2 - 96.9   |
| British Columbia           | 2000-2004           | 25.2           | 23.1 - 27.4 | 70.6             | 61.8 - 79.5 | 47.5             | 45.2 - 49.7 | 61.0              | 59.6 - 62.4 | 95.8           | 91.9 - 99.7  | 89.1                | 80.1 - 98.0   |
|                            | 2005-2009           | 30.3           | 28.0 - 32.7 | 71.7             | 63.5 - 79.9 | 47.1             | 44.9 - 49.3 | 67.8              | 66.6 - 69.0 | 96.4           | 93.8 - 99.1  | 90.7                | 82.6 - 98.7   |
|                            | 2010-2014           | 30.0           | 27.8 - 32.1 | 75.8             | 68.0 - 83.6 | 50.8             | 48.8 - 52.8 | 68.9              | 67.7 - 70.1 | 93.9           | 89.4 - 98.4  | 92.7                | 85.7 - 99.7   |
| Manitoba                   | 2000-2004           | 24.0           | 19.6 - 28.4 | 60.9             | 46.1 - 75.7 | 43.8             | 39.8 - 47.9 | 60.2              | 57.8 - 62.6 | 90.9           | 84.6 - 97.1  | 100.0               | 69.2 - 100.0  |
|                            | 2005-2009           | 30.1           | 26.2 - 34.0 | 72.0             | 57.7 - 86.2 | 50.3             | 46.4 - 54.1 | 67.6              | 65.3 - 70.0 | 88.8           | 78.8 - 98.7  | 91.7                | 76.7 - 100.0  |
|                            | 2010-2014           | 31.0           | 27.1 - 35.0 | 75.8             | 62.5 - 89.0 | 50.0             | 46.2 - 53.8 | 68.6              | 66.3 - 70.9 | 88.5           | 79.8 - 97.3  | 100.0               | 100.0 - 100.0 |
| New Brunswick              | 2000-2004           | 23.1           | 18.3 - 27.9 | 64.8             | 42.9 - 86.7 | 36.9             | 31.3 - 42.5 | 57.6              | 54.6 - 60.5 | 91.0           | 79.2 - 100.0 | -                   | -             |
|                            | 2005-200            |                |             |                  |             |                  |             |                   |             |                |              |                     |               |

**Web-table 4.3: Age-standardised five-year net survival (NS, %): adults (15-99 years) and children (0-14 years) diagnosed with brain tumours, adults with myeloid or lymphoid malignancies, and children with acute lymphoblastic leukaemia or lymphoma, by continent, country, registry and calendar period of diagnosis (2000-2004, 2005-2009, 2010-2014)**

|                                  | Period of diagnosis | Brain (adults) |             | Brain (children) |              | Myeloid (adults) |             | Lymphoid (adults) |             | ALL (children) |              | Lymphoma (children) |               |
|----------------------------------|---------------------|----------------|-------------|------------------|--------------|------------------|-------------|-------------------|-------------|----------------|--------------|---------------------|---------------|
|                                  |                     | NS (%)         | 95% CI      | NS (%)           | 95% CI       | NS (%)           | 95% CI      | NS (%)            | 95% CI      | NS (%)         | 95% CI       | NS (%)              | 95% CI        |
| Prince Edward Island             | 2000-2004           | 14.5           | 4.2 - 24.7  | -                | -            | 31.0             | 19.7 - 42.3 | 59.3              | 52.2 - 66.4 | -              | -            | -                   | -             |
|                                  | 2005-2009           | 20.6           | 8.8 - 32.4  | -                | -            | 48.3             | 37.8 - 58.7 | 66.7              | 60.1 - 73.3 | -              | -            | -                   | -             |
|                                  | 2010-2014           | 18.1           | 8.0 - 28.2  | -                | -            | 52.9             | 42.0 - 63.8 | 73.4              | 66.7 - 80.0 | -              | -            | -                   | -             |
| Saskatchewan                     | 2000-2004           | 22.3           | 17.7 - 27.0 | 82.6             | 67.5 - 97.8  | 51.2             | 46.6 - 55.9 | 61.7              | 59.1 - 64.2 | 90.4           | 80.2 - 100.0 | 87.6                | 71.9 - 100.0  |
|                                  | 2005-2009           | 31.0           | 26.4 - 35.6 | 74.3             | 60.6 - 87.9  | 53.8             | 49.5 - 58.1 | 65.9              | 63.5 - 68.4 | 81.6           | 72.0 - 91.1  | 85.7                | 68.1 - 100.0  |
|                                  | 2010-2014           | 30.5           | 26.1 - 34.8 | 58.5             | 43.2 - 73.7  | 51.0             | 46.7 - 55.3 | 69.6              | 67.2 - 72.0 | 87.1           | 78.7 - 95.5  | 92.7                | 84.1 - 100.0  |
| United States<br>(48 registries) | 2000-2004           | 26.8           | 26.5 - 27.1 | 72.1             | 71.1 - 73.2  | 41.0             | 40.7 - 41.3 | 61.2              | 61.0 - 61.4 | 86.7           | 85.8 - 87.5  | 88.5                | 87.4 - 89.6   |
|                                  | 2005-2009           | 35.1           | 34.8 - 35.4 | 76.8             | 75.9 - 77.7  | 45.9             | 45.6 - 46.2 | 66.1              | 66.0 - 66.3 | 88.1           | 87.3 - 88.9  | 90.2                | 89.2 - 91.3   |
|                                  | 2010-2014           | 36.5           | 36.1 - 36.8 | 78.2             | 77.3 - 79.2  | 46.7             | 46.4 - 47.0 | 68.1              | 67.9 - 68.3 | 89.5           | 88.8 - 90.3  | 94.3                | 93.6 - 95.1   |
| Alabama                          | 2000-2004           | 25.6           | 23.4 - 27.8 | 64.3             | 55.9 - 72.7  | 34.8             | 32.3 - 37.3 | 56.1              | 54.5 - 57.6 | 83.2           | 76.0 - 90.3  | 88.5                | 80.1 - 96.9   |
|                                  | 2005-2009           | 29.4           | 27.3 - 31.5 | 77.3             | 70.8 - 83.7  | 38.7             | 36.5 - 40.9 | 63.6              | 62.1 - 65.1 | 89.6           | 84.0 - 95.2  | 96.4                | 92.0 - 100.0  |
|                                  | 2010-2014           | 30.7           | 28.6 - 32.8 | 76.4             | 69.8 - 82.9  | 37.9             | 35.8 - 40.0 | 62.9              | 61.5 - 64.4 | 96.0           | 92.9 - 99.1  | 99.3                | 97.7 - 100.0  |
| Alaska                           | 2000-2004           | 29.8           | 23.7 - 36.0 | 64.8             | 42.9 - 86.7  | 40.1             | 32.1 - 48.1 | 62.3              | 57.4 - 67.3 | 91.7           | 80.9 - 100.0 | 88.3                | 73.5 - 100.0  |
|                                  | 2005-2009           | 35.4           | 29.6 - 41.1 | 87.0             | 73.5 - 100.0 | 45.9             | 39.1 - 52.7 | 66.1              | 61.7 - 70.5 | 93.4           | 84.6 - 100.0 | 87.6                | 71.9 - 100.0  |
|                                  | 2010-2014           | 31.3           | 25.7 - 37.0 | 62.4             | 41.1 - 83.8  | 50.6             | 43.2 - 58.0 | 65.7              | 60.6 - 70.9 | 84.5           | 63.8 - 100.0 | 94.5                | 85.4 - 100.0  |
| Arkansas                         | 2000-2004           | 27.0           | 24.3 - 29.8 | 72.7             | 63.4 - 82.1  | 42.2             | 39.3 - 45.1 | 61.2              | 59.4 - 63.0 | 92.7           | 86.3 - 99.0  | 83.3                | 72.6 - 94.0   |
|                                  | 2005-2009           | 39.1           | 36.3 - 41.8 | 72.1             | 64.1 - 80.1  | 40.9             | 38.2 - 43.6 | 64.4              | 62.6 - 66.1 | 93.2           | 86.9 - 99.5  | 84.0                | 74.5 - 93.5   |
|                                  | 2010-2014           | 41.7           | 37.2 - 46.3 | 76.6             | 65.7 - 87.6  | 38.0             | 33.9 - 42.1 | 65.4              | 62.6 - 68.2 | 94.0           | 87.4 - 100.0 | 82.2                | 69.8 - 94.7   |
| California                       | 2000-2004           | 25.6           | 24.8 - 26.4 | 70.0             | 67.3 - 72.8  | 38.0             | 37.1 - 38.9 | 60.1              | 59.6 - 60.7 | 84.3           | 82.3 - 86.3  | 86.9                | 84.0 - 89.8   |
|                                  | 2005-2009           | 33.5           | 32.7 - 34.4 | 75.7             | 73.4 - 78.1  | 43.4             | 42.6 - 44.2 | 64.7              | 64.2 - 65.2 | 87.0           | 85.3 - 88.8  | 91.8                | 89.4 - 94.2   |
|                                  | 2010-2014           | 36.0           | 34.6 - 37.3 | 78.5             | 74.9 - 82.1  | 44.6             | 43.3 - 45.8 | 65.7              | 64.9 - 66.5 | 86.8           | 84.1 - 89.6  | 95.3                | 92.7 - 97.9   |
| Greater Bay Area                 | 2000-2004           | 25.8           | 23.8 - 27.7 | 69.9 §           | 63.3 - 76.6  | 41.0             | 38.8 - 43.1 | 62.1              | 60.9 - 63.3 | 86.2 §         | 80.6 - 91.9  | 89.3 §              | 82.3 - 96.3   |
|                                  | 2005-2009           | 35.2           | 33.3 - 37.0 | 76.8             | 71.2 - 82.4  | 47.7             | 45.8 - 49.5 | 67.4              | 66.3 - 68.5 | 88.9 §         | 84.4 - 93.3  | 91.2 §              | 85.5 - 96.9   |
|                                  | 2010-2014           | 34.5           | 32.7 - 36.4 | 73.6             | 67.9 - 79.2  | 46.7             | 44.9 - 48.5 | 69.3              | 68.2 - 70.4 | 90.2 §         | 86.3 - 94.1  | 93.1 §              | 88.3 - 98.0   |
| Greater California               | 2000-2004           | 25.1           | 24.0 - 26.1 | 71.1             | 67.5 - 74.7  | 35.9             | 34.7 - 37.0 | 59.0              | 58.2 - 59.7 | 83.2 §         | 80.4 - 85.9  | 86.0 §              | 82.0 - 89.9   |
|                                  | 2005-2009           | 32.3           | 31.2 - 33.4 | 75.4 §           | 72.3 - 78.4  | 40.8             | 39.7 - 41.9 | 63.6              | 62.9 - 64.3 | 87.2 §         | 84.8 - 89.6  | 92.0 §              | 88.7 - 95.2   |
|                                  | 2010-2014           | 34.3           | 33.2 - 35.4 | 76.2 §           | 73.1 - 79.4  | 42.8             | 41.7 - 43.8 | 65.4              | 64.7 - 66.0 | 88.5 §         | 86.2 - 90.8  | 95.6 §              | 93.4 - 97.8   |
| Los Angeles                      | 2000-2004           | 24.7           | 23.0 - 26.4 | 67.6 §           | 62.3 - 72.9  | 38.6             | 36.8 - 40.4 | 59.4              | 58.3 - 60.5 | 85.0 §         | 81.5 - 88.5  | 86.8 §              | 81.2 - 92.4   |
|                                  | 2005-2009           | 31.5           | 29.8 - 33.2 | 73.9 §           | 69.2 - 78.6  | 43.5             | 41.9 - 45.2 | 63.0              | 62.0 - 64.1 | 85.1 §         | 81.8 - 88.5  | 91.6 §              | 86.1 - 97.1   |
|                                  | 2010-2014           | 33.2           | 31.4 - 35.0 | 72.6 §           | 66.7 - 78.5  | 44.6             | 42.9 - 46.2 | 63.8 §            | 62.8 - 64.8 | 85.8 §         | 82.3 - 89.4  | 92.1 §              | 87.2 - 96.9   |
| Colorado                         | 2000-2004           | 27.1           | 24.9 - 29.2 | 70.1             | 62.4 - 77.7  | 41.2             | 38.8 - 43.7 | 63.1              | 61.6 - 64.6 | 83.2           | 76.5 - 90.0  | 95.8                | 92.3 - 99.4   |
|                                  | 2005-2009           | 35.4           | 33.4 - 37.4 | 72.8             | 65.5 - 80.0  | 47.3             | 45.0 - 49.6 | 69.9              | 68.6 - 71.3 | 93.5           | 89.4 - 97.6  | 89.3                | 82.9 - 95.8   |
|                                  | 2010-2014           | 35.3           | 33.0 - 37.6 | 79.7             | 73.0 - 86.3  | 50.0             | 47.5 - 52.4 | 72.7              | 71.2 - 74.2 | 90.2           | 85.2 - 95.1  | 95.6                | 91.4 - 99.8   |
| Connecticut                      | 2000-2004           | 27.1           | 24.7 - 29.5 | 77.8 §           | 70.7 - 84.9  | 41.7             | 39.2 - 44.2 | 65.7              | 64.3 - 67.2 | 89.3 §         | 83.4 - 95.1  | 88.2                | 79.8 - 96.6   |
|                                  | 2005-2009           | 30.8           | 28.4 - 33.1 | 73.6 §           | 65.7 - 81.5  | 50.1             | 47.9 - 52.3 | 71.0              | 69.7 - 72.4 | 93.7 §         | 89.0 - 98.4  | 91.1 §              | 85.2 - 97.0   |
|                                  | 2010-2014           | 33.2           | 30.7 - 35.6 | 78.6 §           | 71.4 - 85.7  | 49.0             | 46.9 - 51.1 | 71.6              | 70.3 - 72.9 | 89.7 §         | 84.0 - 95.3  | 100.0 §             | 100.0 - 100.0 |
| Delaware                         | 2000-2004           | 24.5           | 19.8 - 29.2 | 69.1             | 56.0 - 82.1  | 36.4             | 31.0 - 41.9 | 59.2              | 55.9 - 62.5 | 91.1           | 83.9 - 98.4  | 71.5                | 52.7 - 90.3   |
|                                  | 2005-2009           | 34.5           | 29.6 - 39.4 | 68.6             | 56.2 - 81.0  | 37.5             | 32.6 - 42.3 | 67.3              | 64.4 - 70.2 | 92.4           | 82.3 - 100.0 | 95.3                | 86.4 - 100.0  |
|                                  | 2010-2014           | 34.7           | 29.7 - 39.6 | 82.2             | 68.9 - 95.6  | 44.2             | 39.4 - 48.9 | 68.5              | 65.7 - 71.4 | 97.8           | 93.7 - 100.0 | 95.9                | 90.1 - 100.0  |
| Florida                          | 2000-2004           | 29.1           | 27.9 - 30.3 | 74.7             | 71.0 - 78.3  | 44.4             | 43.4 - 45.4 | 60.5              | 59.9 - 61.1 | 85.2           | 81.6 - 88.8  | 86.4                | 82.0 - 90.8   |
|                                  | 2005-2009           | 37.5           | 36.4 - 38.6 | 75.0             | 71.6 - 78.3  | 47.6             | 46.7 - 48.5 | 64.5              | 63.9 - 65.1 | 90.1           | 87.1 - 93.1  | 86.7                | 82.0 - 91.3   |
|                                  | 2010-2014           | 37.5           | 36.3 - 38.7 | 78.0             | 74.5 - 81.6  | 48.2             | 47.2 - 49.1 | 65.4              | 64.7 - 66.1 | 90.3           | 87.1 - 93.6  | 94.7                | 91.5 - 97.8   |
| Georgia                          | 2000-2004           | 25.0           | 23.4 - 26.7 | 70.9             | 65.6 - 76.1  | 40.3             | 38.5 - 42.2 | 59.0              | 57.8 - 60.2 | 89.2           | 84.9 - 93.4  | 87.2                | 82.4 - 92.0   |
|                                  | 2005-2009           | 34.2           | 32.6 - 35.8 | 72.9             | 68.4 - 77.4  | 44.4             | 42.8 - 46.0 | 63.7              | 62.6 - 64.8 | 86.8           | 82.5 - 91.0  | 90.5                | 85.5 - 95.6   |
|                                  | 2010-2014           | 35.0           | 33.4 - 36.6 | 73.3             | 68.9 - 77.7  | 45.6             | 44.1 - 47.1 | 65.4              | 64.3 - 66.4 | 84.6           | 80.4 - 88.8  | 96.5                | 94.1 - 99.0   |
| Atlanta                          | 2000-2004           | 24.9           | 22.1 - 27.7 | 65.6             | 56.3 - 74.8  | 38.8             | 35.3 - 42.3 | 61.4              | 59.2 - 63.6 | 85.7           | 77.6 - 93.7  | 81.7                | 73.7 - 89.7   |
|                                  | 2005-2009           | 36.9           | 33.8 - 40.1 | 75.2             | 67.5 - 82.9  | 46.3             | 43.2 - 49.4 | 66.9              | 64.8 - 68.9 | 84.5           | 77.0 - 91.9  | 87.7                | 80.8 - 94.7   |
|                                  | 2010-2014           | 37.6           | 34.7 - 40.6 | 72.4             | 64.6 - 80.1  | 46.2             | 43.4 - 49.0 | 68.8              | 66.8 - 70.7 | 79.6           | 71.8 - 87.4  | 97.5                | 94.1 - 100.0  |
| Hawaii                           | 2000-2004           | 26.9           | 21.8 - 32.0 | 76.1 §           | 63.4 - 88.8  | 35.8             | 31.8 - 39.8 | 60.5              | 57.6 - 63.3 | 92.5 §         | 85.3 - 99.6  | 100.0 §             | 83.2 - 100.0  |
|                                  | 2005-2009           | 40.3           | 35.3 - 45.3 | 77.1 §           | 64.8 - 89.5  | 44.8             | 41.1 - 48.6 | 62.1              | 59.5 - 64.7 | 93.0 §         | 88.1 - 98.0  | 92.3 §              | 78.4 - 100.0  |
|                                  | 2010-2014           | 37.1           | 32.4 - 41.8 | 78.2 §           | 65.0 - 91.4  | 42.6             | 39.2 - 46.1 | 64.4              | 61.9 - 66.9 | 86.7 §         | 76.6 - 96.9  | 92.6 §              | 83.5 - 100.0  |
| Idaho                            | 2000-2004           | 27.3           | 23.5 - 31.1 | 76.8             | 66.9 - 86.8  | 43.8             | 39.9 - 47.7 | 63.6              | 61.0 - 66.1 | 92.7           | 86.6 - 98.9  | 92.9                | 83.5 - 100.0  |
|                                  | 2005-2009           | 33.3           | 29.5 - 37.1 | 78.6             | 66.4 - 90.9  | 49.4             | 46.0 - 52.9 | 68.5              | 66.3 - 70.8 | 94.7           | 90.3 - 99.1  | 91.3                | 80.0 - 100.0  |
|                                  | 2010-2014           | 34.4           | 30.8 - 38.0 | 82.3             | 72.1 - 92.5  | 50.3             | 46.8 - 53.8 | 70.1              | 67.9 - 72.2 | 95.0           | 89.9 - 100.0 | 100.0               | 100.0 - 100.0 |
| Indiana                          | 2000-2004           | 25.4           | 23.6 - 27.3 | 70.8             | 64.3 - 77.4  | 39.6             | 37.7 - 41.5 | 60.5              | 59.3 - 61.7 | 86.8           | 81.4 - 92.3  | 92.6                | 87.5 - 97.7   |
|                                  | 2005-2009           | 33.8           | 32.1 - 35.5 | 76.3             | 71.2 - 81.4  | 42.4             | 40.6 - 44.2 | 65.5              | 64.3 - 66.6 | 83.9           | 78.9 - 88.8  | 91.2                | 85.4 - 97.0   |
|                                  | 2010-2014           | 34.7           | 32.9 - 36.4 | 79.4             | 74.6 - 84.2  | 42.6             | 40.9 - 44.4 | 66.0              | 64.9 - 67.2 | 88.7           | 84.3 - 93.0  | 95.2                | 91.3 - 99.1   |
| Iowa                             | 2000-2004           | 23.1           | 20.6 - 25.6 | 75.3             | 67.1 - 83.6  | 42.8             | 40.2 - 45.3 | 64.2              | 62.7 - 65.7 | 90.5           | 83.6 - 97.5  | 90.0                | 82.7 - 97.4   |
|                                  | 2005-2009           | 32.7           | 30.3 - 35.1 | 71.9             | 63.9 - 79.9  | 45.2             | 42.9 - 47.4 | 68.9              | 67.4 - 70.3 | 86.9           | 79.2 - 94.7  | 89.3                | 81.0 - 97.7   |
|                                  | 2010-2014           | 35.9           | 33.4 - 38.4 | 75.5             | 68.3 - 82.7  | 45.6             | 43.4 - 47.8 | 68.6              | 67.2 - 70.1 | 89.0           | 82.0 - 96.1  | 93.3</              |               |

**Web-table 4.3: Age-standardised five-year net survival (NS, %): adults (15-99 years) and children (0-14 years) diagnosed with brain tumours, adults with myeloid or lymphoid malignancies, and children with acute lymphoblastic leukaemia or lymphoma, by continent, country, registry and calendar period of diagnosis (2000-2004, 2005-2009, 2010-2014)**

|                | Period of diagnosis | Brain (adults) |             | Brain (children) |             | Myeloid (adults) |             | Lymphoid (adults) |             | ALL (children) |               | Lymphoma (children) |               |
|----------------|---------------------|----------------|-------------|------------------|-------------|------------------|-------------|-------------------|-------------|----------------|---------------|---------------------|---------------|
|                |                     | NS (%)         | 95% CI      | NS (%)           | 95% CI      | NS (%)           | 95% CI      | NS (%)            | 95% CI      | NS (%)         | 95% CI        | NS (%)              | 95% CI        |
| Mississippi    | 2000-2004           | 24.1           | 20.5 - 27.8 | 57.5             | 46.4 - 68.5 | 35.1             | 31.0 - 39.2 | 57.1              | 54.6 - 59.7 | 93.7           | 88.0 - 99.4   | 88.1                | 75.6 - 100.0  |
|                | 2005-2009           | 28.5           | 25.7 - 31.4 | 71.8             | 63.6 - 80.0 | 38.6             | 35.7 - 41.4 | 59.9              | 58.0 - 61.8 | 82.0           | 73.7 - 90.3   | 92.6                | 84.9 - 100.0  |
|                | 2010-2014           | 29.8           | 27.1 - 32.6 | 78.1             | 70.2 - 86.1 | 37.6             | 35.0 - 40.3 | 61.8              | 60.0 - 63.7 | 89.9           | 83.3 - 96.5   | 92.0                | 84.8 - 99.1   |
| Missouri       | 2000-2004           | -              | -           | -                | -           | -                | -           | -                 | -           | -              | -             | -                   | -             |
|                | 2005-2009           | -              | -           | -                | -           | -                | -           | -                 | -           | -              | -             | -                   | -             |
|                | 2010-2014           | -              | -           | -                | -           | -                | -           | -                 | -           | -              | -             | -                   | -             |
| Montana        | 2000-2004           | 29.6           | 25.3 - 33.9 | 77.0             | 61.1 - 92.8 | 42.1             | 37.7 - 46.5 | 65.3              | 62.3 - 68.3 | 90.4           | 80.1 - 100.0  | 93.9                | 82.4 - 100.0  |
|                | 2005-2009           | 34.0           | 29.5 - 38.5 | 65.3             | 46.3 - 84.3 | 48.3             | 44.4 - 52.3 | 71.1              | 68.4 - 73.8 | 82.9           | 70.6 - 95.2   | -                   | -             |
|                | 2010-2014           | 34.3           | 30.1 - 38.6 | 66.5             | 50.4 - 82.5 | 52.9             | 48.9 - 56.9 | 73.3              | 70.8 - 75.9 | 93.1           | 85.9 - 100.0  | 91.0                | 81.1 - 100.0  |
| Nebraska       | 2000-2004           | 26.2           | 23.0 - 29.5 | 57.6             | 45.7 - 69.5 | 36.0             | 32.6 - 39.5 | 62.5              | 60.4 - 64.5 | 92.5           | 86.6 - 98.5   | 96.3                | 89.3 - 100.0  |
|                | 2005-2009           | 34.9           | 31.6 - 38.3 | 86.0             | 79.3 - 92.6 | 43.3             | 40.1 - 46.6 | 70.0              | 68.0 - 72.0 | 94.2           | 89.2 - 99.2   | 95.6                | 90.1 - 100.0  |
|                | 2010-2014           | 34.3           | 31.0 - 37.6 | 76.1             | 67.5 - 84.7 | 43.2             | 40.1 - 46.3 | 70.5              | 68.5 - 72.5 | 89.9           | 81.4 - 98.3   | 91.0                | 82.7 - 99.3   |
| New Hampshire  | 2000-2004           | 28.3           | 24.6 - 31.9 | 70.1             | 59.0 - 81.3 | 50.7             | 46.5 - 55.0 | 65.5              | 63.1 - 68.0 | 96.2           | 91.0 - 100.0  | 91.3                | 80.1 - 100.0  |
|                | 2005-2009           | 36.7           | 33.1 - 40.3 | 82.5             | 72.4 - 92.5 | 55.4             | 51.7 - 59.1 | 72.0              | 69.8 - 74.3 | 85.9           | 76.5 - 95.3   | 88.5                | 76.5 - 100.0  |
|                | 2010-2014           | 36.4           | 33.0 - 39.7 | 82.2             | 72.2 - 92.2 | 56.6             | 53.0 - 60.2 | 74.7              | 72.4 - 77.0 | 96.2           | 91.2 - 100.0  | 97.0                | 91.6 - 100.0  |
| New Jersey     | 2000-2004           | 26.4           | 24.8 - 28.0 | 76.8 §           | 72.1 - 81.5 | 42.6             | 41.0 - 44.2 | 62.0 §            | 61.1 - 62.9 | 88.9 §         | 85.1 - 92.7   | 88.6 §              | 82.9 - 94.3   |
|                | 2005-2009           | 33.6 §         | 32.1 - 35.2 | 78.5 §           | 74.0 - 83.0 | 46.7 §           | 45.3 - 48.1 | 67.8 §            | 66.9 - 68.7 | 87.2 §         | 83.3 - 91.1   | 95.9 §              | 93.1 - 98.6   |
|                | 2010-2014           | 35.1 §         | 33.5 - 36.7 | 76.1 §           | 71.2 - 80.9 | 46.9 §           | 45.5 - 48.2 | 70.1 §            | 69.2 - 71.0 | 91.2 §         | 87.5 - 94.9   | 96.9 §              | 93.9 - 99.8   |
| New Mexico     | 2000-2004           | 27.0           | 23.0 - 31.0 | 54.5 §           | 39.2 - 69.8 | 47.1             | 43.5 - 50.8 | 60.1              | 57.8 - 62.4 | 92.4 §         | 87.0 - 97.8   | 84.6 §              | 73.7 - 95.5   |
|                | 2005-2009           | 34.4           | 30.7 - 38.1 | 83.1 §           | 74.1 - 92.1 | 50.6             | 47.4 - 53.8 | 65.2              | 63.0 - 67.3 | 86.7 §         | 78.9 - 94.5   | 91.7 §              | 82.4 - 100.0  |
|                | 2010-2014           | 33.6           | 30.1 - 37.2 | 72.3 §           | 61.2 - 83.4 | 45.7             | 42.6 - 48.8 | 65.6              | 63.5 - 67.8 | 88.7 §         | 82.3 - 95.0   | 100.0 §             | 100.0 - 100.0 |
| New York       | 2000-2004           | 29.4           | 28.3 - 30.5 | 77.3             | 74.1 - 80.6 | 39.1             | 38.0 - 40.1 | 60.6              | 60.0 - 61.3 | 86.3           | 83.1 - 89.5   | 88.4                | 84.7 - 92.0   |
|                | 2005-2009           | 37.0           | 35.9 - 38.0 | 79.0             | 76.0 - 82.0 | 46.6             | 45.6 - 47.5 | 66.7              | 66.1 - 67.2 | 87.2           | 84.3 - 90.1   | 89.3                | 85.5 - 93.1   |
|                | 2010-2014           | 37.8           | 36.8 - 38.9 | 80.6             | 77.7 - 83.5 | 50.1             | 49.2 - 51.0 | 70.6              | 70.0 - 71.2 | 88.6           | 85.9 - 91.2   | 93.0                | 90.3 - 95.8   |
| New York City  | 2000-2004           | 31.7           | 29.8 - 33.6 | 75.3             | 69.9 - 80.8 | 38.1             | 36.3 - 40.0 | 56.7              | 55.6 - 57.8 | 85.5           | 80.4 - 90.5   | 90.3                | 85.4 - 95.1   |
|                | 2005-2009           | 38.3           | 36.5 - 40.1 | 76.8             | 72.0 - 81.6 | 47.3             | 45.7 - 49.0 | 63.0              | 62.0 - 64.1 | 84.4           | 79.7 - 89.1   | 90.8                | 85.6 - 95.9   |
|                | 2010-2014           | 39.5           | 37.7 - 41.4 | 77.5             | 72.7 - 82.3 | 51.9             | 50.3 - 53.6 | 67.7              | 66.7 - 68.7 | 86.9           | 82.6 - 91.3   | 92.9                | 88.7 - 97.2   |
| North Carolina | 2000-2004           | 25.6           | 24.1 - 27.1 | 68.5             | 62.8 - 74.1 | 44.9             | 43.0 - 46.8 | 61.4              | 60.3 - 62.5 | 89.2           | 85.0 - 93.4   | 90.8                | 85.1 - 96.5   |
|                | 2005-2009           | 34.7           | 33.2 - 36.2 | 78.4             | 74.0 - 82.8 | 48.5             | 47.0 - 50.0 | 67.4              | 66.4 - 68.4 | 87.4           | 83.3 - 91.5   | 91.1                | 85.9 - 96.4   |
|                | 2010-2014           | 35.3           | 33.7 - 36.8 | 78.6             | 74.4 - 82.8 | 48.9             | 47.4 - 50.3 | 67.8              | 66.9 - 68.8 | 91.2           | 88.0 - 94.3   | 98.2                | 96.5 - 100.0  |
| Ohio           | 2000-2004           | 24.7           | 23.4 - 26.0 | 73.2             | 68.5 - 78.0 | 36.0             | 34.5 - 37.5 | 60.4              | 59.5 - 61.3 | 89.3           | 85.7 - 93.0   | 80.0                | 72.8 - 87.2   |
|                | 2005-2009           | 31.7           | 30.4 - 33.0 | 72.6             | 68.6 - 76.6 | 40.0             | 38.6 - 41.4 | 64.5              | 63.6 - 65.3 | 89.2           | 85.5 - 93.0   | 89.3                | 84.3 - 94.4   |
|                | 2010-2014           | 35.3           | 33.9 - 36.7 | 76.6             | 72.8 - 80.4 | 41.5             | 40.1 - 42.9 | 67.2              | 66.3 - 68.1 | 88.6           | 85.2 - 92.0   | 89.0                | 84.3 - 93.7   |
| Oklahoma       | 2000-2004           | 22.3           | 20.0 - 24.6 | 63.1             | 53.7 - 72.4 | 35.6             | 33.1 - 38.1 | 55.2              | 53.6 - 56.8 | 84.5           | 77.2 - 91.8   | 82.7                | 72.8 - 92.5   |
|                | 2005-2009           | 33.9           | 31.5 - 36.4 | 77.3             | 70.0 - 84.6 | 45.2             | 42.8 - 47.5 | 63.0              | 61.5 - 64.6 | 88.6           | 82.5 - 94.8   | 90.6                | 83.2 - 98.0   |
|                | 2010-2014           | 36.3           | 30.8 - 41.8 | 68.0             | 50.8 - 85.2 | 42.3             | 37.3 - 47.4 | 63.4              | 60.0 - 66.9 | 92.0           | 82.0 - 100.0  | -                   | -             |
| Oregon         | 2000-2004           | 24.3           | 22.1 - 26.6 | 68.1             | 59.1 - 77.1 | 34.4             | 31.8 - 37.1 | 63.3              | 61.8 - 64.9 | 85.1           | 78.6 - 91.7   | 91.2                | 82.4 - 100.0  |
|                | 2005-2009           | 30.9           | 28.8 - 32.9 | 78.2             | 71.0 - 85.3 | 38.4             | 36.0 - 40.8 | 65.8              | 64.3 - 67.3 | 88.7           | 83.3 - 94.0   | 91.7                | 85.2 - 98.2   |
|                | 2010-2014           | 31.9           | 29.5 - 34.3 | 79.6             | 72.0 - 87.1 | 39.8             | 37.2 - 42.4 | 68.5              | 66.9 - 70.2 | 89.6           | 83.6 - 95.6   | 95.2                | 89.2 - 100.0  |
| Pennsylvania   | 2000-2004           | 25.7           | 24.4 - 27.0 | 74.3             | 70.1 - 78.5 | 41.0             | 39.8 - 42.2 | 61.6              | 60.8 - 62.3 | 87.9           | 84.4 - 91.4   | 93.7                | 90.0 - 97.5   |
|                | 2005-2009           | 35.4           | 34.1 - 36.6 | 77.9             | 74.0 - 81.8 | 47.0             | 45.9 - 48.2 | 66.6              | 65.8 - 67.3 | 86.7           | 82.9 - 90.6   | 91.5                | 87.0 - 96.1   |
|                | 2010-2014           | 37.0           | 35.7 - 38.2 | 76.3             | 72.4 - 80.2 | 48.0             | 46.9 - 49.1 | 69.8              | 69.1 - 70.5 | 88.8           | 85.4 - 92.2   | 93.3                | 89.6 - 96.9   |
| Rhode Island   | 2000-2004           | 27.1           | 22.8 - 31.5 | 71.1             | 57.6 - 84.6 | 42.1             | 37.6 - 46.5 | 63.6              | 61.0 - 66.3 | 86.0           | 77.0 - 95.0   | 82.4                | 64.8 - 99.9   |
|                | 2005-2009           | 33.7           | 29.7 - 37.8 | 87.0             | 78.1 - 96.0 | 48.6             | 44.3 - 52.9 | 67.9              | 65.3 - 70.4 | 100.0          | 100.0 - 100.0 | 100.0               | 78.2 - 100.0  |
|                | 2010-2014           | 33.9           | 29.5 - 38.3 | 77.9             | 64.0 - 91.8 | 49.1             | 44.8 - 53.4 | 72.1              | 69.6 - 74.6 | 98.4           | 95.2 - 100.0  | 100.0               | 100.0 - 100.0 |
| South Carolina | 2000-2004           | 24.2           | 21.9 - 26.4 | 67.7             | 59.0 - 76.4 | 42.6             | 40.1 - 45.1 | 58.6              | 57.1 - 60.2 | 89.3           | 83.3 - 95.2   | 85.4                | 76.3 - 94.5   |
|                | 2005-2009           | 32.6           | 30.4 - 34.9 | 71.7             | 64.8 - 78.6 | 43.3             | 41.2 - 45.4 | 64.1              | 62.7 - 65.6 | 85.6           | 77.9 - 93.2   | 87.5                | 78.2 - 96.9   |
|                | 2010-2014           | 34.0           | 31.8 - 36.2 | 71.4             | 64.1 - 78.6 | 44.5             | 42.5 - 46.5 | 66.0              | 64.6 - 67.4 | 88.9           | 82.0 - 95.9   | 95.4                | 89.5 - 100.0  |
| Tennessee      | 2000-2004           | 26.5           | 24.6 - 28.4 | 68.8             | 61.2 - 76.3 | 34.4             | 32.1 - 36.8 | 62.4              | 60.9 - 63.9 | 90.3           | 85.3 - 95.4   | 96.3                | 93.3 - 99.4   |
|                | 2005-2009           | 33.5           | 31.8 - 35.2 | 76.0             | 70.8 - 81.3 | 40.6             | 38.8 - 42.5 | 64.3              | 63.1 - 65.5 | 91.1           | 86.7 - 95.6   | 91.2                | 85.1 - 97.3   |
|                | 2010-2014           | 35.9           | 33.0 - 38.8 | 76.3             | 67.9 - 84.7 | 39.0             | 36.2 - 41.8 | 65.0              | 63.0 - 66.9 | 89.2           | 81.8 - 96.6   | 97.3                | 93.7 - 100.0  |
| Texas          | 2000-2004           | 28.9           | 27.8 - 30.0 | 69.0             | 65.8 - 72.3 | 45.5             | 44.5 - 46.6 | 60.1              | 59.4 - 60.8 | 83.8           | 81.2 - 86.4   | 89.1                | 86.1 - 92.2   |
|                | 2005-2009           | 40.9           | 39.9 - 42.0 | 76.9             | 74.4 - 79.4 | 49.9             | 49.0 - 50.8 | 64.6              | 64.0 - 65.3 | 86.0           | 83.7 - 88.3   | 88.3                | 85.2 - 91.3   |
|                | 2010-2014           | 41.6           | 40.5 - 42.8 | 78.1             | 75.4 - 80.8 | 48.8             | 47.8 - 49.8 | 65.9              | 65.2 - 66.6 | 87.9           | 85.6 - 90.2   | 93.1                | 90.6 - 95.5   |
| Utah           | 2000-2004           | 29.2           | 26.0 - 32.5 | 75.9 §           | 67.7 - 84.0 | 34.7             | 31.2 - 38.3 | 64.5              | 62.3 - 66.8 | 91.2 §         | 84.9 - 97.5   | 96.1                | 91.0 - 100.0  |
|                | 2005-2009           | 33.7           | 30.7 - 36.6 | 80.9 §           | 74.6 - 87.1 | 42.8             | 39.5 - 46.1 | 69.1              | 67.0 - 71.1 | 92.7           | 87.5 - 97.9   | 90.0                | 83.3 - 96.7   |
|                | 2010-2014           | 36.3           | 33.3 - 39.3 | 81.5 §           | 75.5 - 87.4 | 41.8             | 38.7 - 44.9 | 71.3              | 69.4 - 73.2 | 89.0 §         | 82.8 - 95.3   | 93.6 §              | 87.4 - 99.8   |
| Vermont        | 2000-2004           | 29.1           | 23.7 - 34.5 | 61.6             | 36.4 - 86.7 | 45.7             | 39.7 - 51.7 | 66.3              | 62.8 - 69.8 | 87.0           | 78.7 - 95.2   | 91.7                | 76.7 - 100.0  |
|                | 2005-2009           | 40.2           | 35.7 - 44.7 | 70.0             | 43.3 - 96.8 | 49.0             | 43.2 - 54.7 | 70.7              | 67.4 - 74.0 | 100.0          | 84.6 - 100.0  | 100.0               | 75.3 - 100.0  |
|                | 2010-2014           | 34.1           | 28.9 - 39.2 | 72.2             | 54.1 - 90.4 | 50.7             | 44.2 - 57.2 | 70.4              | 66.8 - 74.0 | 100.0          | 100.0 - 100.0 | -                   | -             |
| Washington     | 2000-2004           | 28.0           | 26.3 - 29.7 | 75.8             | 70.1 - 81.5 | 45.9             | 44.0 - 47.8 | 66.1              | 65.0 - 6    |                |               |                     |               |

**Web-table 4.3: Age-standardised five-year net survival (NS, %): adults (15-99 years) and children (0-14 years) diagnosed with brain tumours, adults with myeloid or lymphoid malignancies, and children with acute lymphoblastic leukaemia or lymphoma, by continent, country, registry and calendar period of diagnosis (2000-2004, 2005-2009, 2010-2014)**

|                      | Period of diagnosis | Brain (adults) |             | Brain (children) |             | Myeloid (adults) |             | Lymphoid (adults) |             | ALL (children) |             | Lymphoma (children) |              |
|----------------------|---------------------|----------------|-------------|------------------|-------------|------------------|-------------|-------------------|-------------|----------------|-------------|---------------------|--------------|
|                      |                     | NS (%)         | 95% CI      | NS (%)           | 95% CI      | NS (%)           | 95% CI      | NS (%)            | 95% CI      | NS (%)         | 95% CI      | NS (%)              | 95% CI       |
| Changle              | 2000-2004           | 34.7           | 19.4 - 50.1 | -                | -           | 18.4             | 2.6 - 34.3  | 17.4              | 5.0 - 29.8  | -              | -           | -                   | -            |
|                      | 2005-2009           | 9.9            | 4.8 - 15.0  | -                | -           | 13.0             | 6.1 - 19.9  | 39.7              | 28.3 - 51.1 | -              | -           | -                   | -            |
|                      | 2010-2014           | 21.1           | 12.7 - 29.6 | -                | -           | 28.9             | 13.3 - 44.5 | 44.7              | 34.7 - 54.8 | -              | -           | -                   | -            |
| Cixian               | 2000-2004           | 11.5           | 1.3 - 21.6  | -                | -           | 7.9              | 0.0 - 17.1  | 35.0              | 17.8 - 52.2 | -              | -           | -                   | -            |
|                      | 2005-2009           | 16.4           | 10.3 - 22.4 | -                | -           | 11.6             | 5.4 - 17.8  | 13.9              | 8.0 - 19.9  | -              | -           | -                   | -            |
|                      | 2010-2014           | 26.3           | 17.6 - 35.0 | -                | -           | 20.9             | 12.9 - 28.9 | 30.6              | 18.8 - 42.5 | 47.7           | 18.0 - 77.4 | -                   | -            |
| Dafeng               | 2000-2004           | 23.8           | 11.3 - 36.4 | -                | -           | 14.9             | 3.4 - 26.5  | -                 | -           | -              | -           | -                   | -            |
|                      | 2005-2009           | 37.6           | 31.2 - 43.9 | -                | -           | 24.8             | 14.9 - 34.7 | 35.8              | 12.0 - 59.6 | -              | -           | -                   | -            |
|                      | 2010-2014           | 39.0           | 31.1 - 47.0 | -                | -           | 31.2             | 19.5 - 42.9 | 35.1              | 18.3 - 62.0 | -              | -           | -                   | -            |
| Dalian               | 2000-2004           | 38.4           | 29.8 - 46.9 | -                | -           | 37.1             | 24.9 - 49.2 | 47.0              | 39.5 - 54.4 | -              | -           | -                   | -            |
|                      | 2005-2009           | 32.7           | 27.8 - 37.6 | 47.1 §           | 24.4 - 69.7 | 31.3             | 25.8 - 36.7 | 46.3              | 42.6 - 50.1 | 83.9           | 73.8 - 94.1 | 70.0                | 43.3 - 96.8  |
|                      | 2010-2014           | 33.8 §         | 28.1 - 39.4 | 27.8 §           | 18.7 - 36.9 | 30.1             | 24.7 - 35.5 | 47.1              | 43.1 - 51.0 | 75.7           | 60.9 - 90.4 | -                   | -            |
| Donghai              | 2000-2004           | -              | -           | -                | -           | 23.3             | 7.6 - 39.0  | 26.0              | 6.2 - 45.8  | -              | -           | -                   | -            |
|                      | 2005-2009           | 29.4           | 22.8 - 36.0 | 22.2             | 4.4 - 40.0  | 21.8             | 15.0 - 28.5 | 25.0              | 18.4 - 31.6 | -              | -           | -                   | -            |
|                      | 2010-2014           | 25.7           | 19.9 - 31.5 | -                | -           | 32.1             | 22.4 - 41.8 | 26.7              | 19.6 - 33.7 | -              | -           | -                   | -            |
| Feicheng             | 2000-2004           | 8.0            | 2.7 - 13.2  | -                | -           | 18.9             | 7.2 - 30.6  | 5.4               | 0.0 - 11.9  | -              | -           | -                   | -            |
|                      | 2005-2009           | 12.8           | 6.9 - 18.6  | -                | -           | 17.1             | 5.5 - 28.6  | 23.5              | 14.4 - 32.5 | -              | -           | -                   | -            |
|                      | 2010-2014           | 22.6           | 15.0 - 30.3 | -                | -           | 19.1             | 4.1 - 34.1  | 39.5              | 29.3 - 49.8 | -              | -           | -                   | -            |
| Ganyu                | 2000-2004           | 9.9            | 2.0 - 17.9  | -                | -           | 5.4              | 0.0 - 11.9  | 5.2               | 0.0 - 11.6  | -              | -           | -                   | -            |
|                      | 2005-2009           | 18.6           | 13.5 - 23.7 | 15.4 §           | 0.0 - 36.7  | 3.8              | 1.3 - 6.2   | 13.4              | 8.0 - 18.8  | -              | -           | -                   | -            |
|                      | 2010-2014           | 23.0           | 18.2 - 27.9 | -                | -           | 10.3             | 4.4 - 16.3  | 17.3              | 12.2 - 22.4 | -              | -           | -                   | -            |
| Guanyun              | 2000-2004           | 33.2           | 17.5 - 48.8 | -                | -           | -                | -           | 31.4              | 11.3 - 51.6 | -              | -           | -                   | -            |
|                      | 2005-2009           | 24.3           | 18.8 - 29.8 | 57.2 §           | 30.2 - 84.2 | 8.3              | 4.6 - 12.1  | 15.6              | 10.8 - 20.3 | -              | -           | -                   | -            |
|                      | 2010-2014           | 21.2           | 15.7 - 26.6 | -                | -           | 17.4             | 9.9 - 24.9  | 13.8              | 9.1 - 18.6  | -              | -           | -                   | -            |
| Haimen               | 2000-2004           | 24.9           | 17.2 - 32.6 | -                | -           | 9.3              | 4.1 - 14.4  | 27.1              | 19.9 - 34.3 | -              | -           | -                   | -            |
|                      | 2005-2009           | 30.5           | 25.5 - 35.6 | 53.9             | 28.2 - 79.5 | 18.4             | 13.3 - 23.5 | 27.9              | 23.8 - 32.0 | 36.4           | 10.2 - 62.5 | -                   | -            |
|                      | 2010-2014           | 39.7           | 33.8 - 45.5 | 71.7             | 51.5 - 92.0 | 33.0             | 25.7 - 40.2 | 36.0              | 31.0 - 41.0 | -              | -           | -                   | -            |
| Haining              | 2000-2004           | 16.4           | 5.8 - 27.0  | -                | -           | 33.3             | 21.2 - 45.4 | 37.6              | 26.8 - 48.3 | -              | -           | -                   | -            |
|                      | 2005-2009           | 23.2           | 16.4 - 30.1 | -                | -           | 14.5             | 9.4 - 19.6  | 29.2              | 22.9 - 35.5 | -              | -           | -                   | -            |
|                      | 2010-2014           | 29.7           | 21.4 - 38.0 | -                | -           | 24.5             | 16.7 - 32.4 | 28.4              | 21.8 - 34.9 | -              | -           | -                   | -            |
| Jianhu               | 2000-2004           | 13.4           | 4.0 - 22.8  | -                | -           | 22.6             | 7.5 - 37.6  | 15.8              | 1.3 - 30.4  | -              | -           | -                   | -            |
|                      | 2005-2009           | 24.1           | 18.4 - 29.8 | -                | -           | 9.0              | 4.3 - 13.6  | 11.8              | 7.3 - 16.2  | -              | -           | -                   | -            |
|                      | 2010-2014           | 34.1           | 26.8 - 41.5 | 0.0              | 0.0 - 0.0   | 14.6             | 8.4 - 20.7  | 13.0              | 8.2 - 17.7  | -              | -           | -                   | -            |
| Jiashan              | 2000-2004           | 26.3           | 13.2 - 39.4 | -                | -           | 12.6             | 0.1 - 25.2  | 21.0              | 9.5 - 32.5  | -              | -           | -                   | -            |
|                      | 2005-2009           | 36.9           | 28.1 - 45.6 | -                | -           | 13.7             | 7.6 - 19.8  | 21.3              | 15.7 - 26.8 | -              | -           | -                   | -            |
|                      | 2010-2014           | 34.8           | 25.3 - 44.2 | -                | -           | 10.4             | 4.6 - 16.3  | 27.3              | 19.1 - 35.6 | -              | -           | -                   | -            |
| Jintan               | 2000-2004           | 28.9           | 13.5 - 44.3 | -                | -           | 39.2 §           | 21.7 - 56.7 | 20.2              | 6.3 - 34.2  | -              | -           | -                   | -            |
|                      | 2005-2009           | 22.3           | 13.8 - 30.8 | -                | -           | 30.3             | 19.0 - 41.6 | 23.4              | 12.9 - 34.0 | -              | -           | -                   | -            |
|                      | 2010-2014           | 19.6           | 9.7 - 29.5  | -                | -           | 38.9             | 26.9 - 50.9 | 36.9              | 22.2 - 51.5 | -              | -           | -                   | -            |
| Lianyungang          | 2000-2004           | -              | -           | -                | -           | -                | -           | -                 | -           | -              | -           | -                   | -            |
|                      | 2005-2009           | 20.1           | 8.7 - 31.6  | -                | -           | 25.2 §           | 14.9 - 35.5 | 33.4 §            | 23.2 - 43.5 | -              | -           | -                   | -            |
|                      | 2010-2014           | 27.7           | 21.2 - 34.2 | -                | -           | 22.1 §           | 15.9 - 28.4 | 39.2 §            | 30.4 - 48.0 | -              | -           | -                   | -            |
| Linzhou              | 2000-2004           | 7.3            | 0.0 - 14.7  | -                | -           | 2.5              | 0.0 - 6.3   | 41.0              | 21.9 - 60.1 | -              | -           | -                   | -            |
|                      | 2005-2009           | 28.0           | 22.8 - 33.2 | 46.2             | 20.7 - 71.7 | 15.7             | 9.2 - 22.3  | 32.9              | 6.2 - 59.5  | -              | -           | -                   | -            |
|                      | 2010-2014           | 47.0           | 39.7 - 54.3 | 47.8             | 20.9 - 74.7 | 19.3             | 12.7 - 25.8 | 29.4              | 19.8 - 39.0 | -              | -           | -                   | -            |
| Qidong               | 2000-2004           | 14.0           | 9.0 - 19.1  | -                | -           | 7.1              | 2.6 - 11.7  | 10.4              | 5.7 - 15.1  | -              | -           | -                   | -            |
|                      | 2005-2009           | 14.5           | 10.5 - 18.5 | -                | -           | 12.3             | 7.5 - 17.1  | 18.5              | 15.0 - 21.9 | -              | -           | -                   | -            |
|                      | 2010-2014           | 18.4           | 13.9 - 23.0 | -                | -           | 11.5             | 7.3 - 15.7  | 21.9              | 17.8 - 26.0 | -              | -           | -                   | -            |
| Sihui                | 2000-2004           | 37.4 §         | 18.7 - 56.1 | -                | -           | 16.8 §           | 0.0 - 35.4  | 15.3              | 0.7 - 29.8  | -              | -           | -                   | -            |
|                      | 2005-2009           | 29.0           | 19.0 - 39.0 | -                | -           | 19.1             | 8.7 - 29.6  | 18.7              | 10.8 - 26.6 | -              | -           | -                   | -            |
|                      | 2010-2014           | 31.7           | 20.6 - 42.8 | -                | -           | 11.2             | 6.7 - 15.7  | 35.2              | 24.3 - 46.1 | -              | -           | -                   | -            |
| Taixing              | 2000-2004           | 11.3           | 2.8 - 19.8  | -                | -           | 2.3              | 0.0 - 6.0   | -                 | -           | -              | -           | -                   | -            |
|                      | 2005-2009           | 16.4 §         | 8.6 - 24.2  | -                | -           | 41.2 §           | 26.4 - 56.0 | 39.0 §            | 23.9 - 54.1 | -              | -           | -                   | -            |
|                      | 2010-2014           | 21.9 §         | 12.8 - 31.1 | -                | -           | 35.6 §           | 25.3 - 45.9 | 46.1 §            | 31.7 - 60.5 | -              | -           | -                   | -            |
| Yangzhong            | 2000-2004           | -              | -           | -                | -           | 20.3             | 0.0 - 42.2  | 56.9              | 30.1 - 83.7 | -              | -           | -                   | -            |
|                      | 2005-2009           | 5.2            | 0.0 - 12.9  | -                | -           | 21.7             | 4.1 - 39.4  | 69.4              | 43.3 - 95.5 | -              | -           | -                   | -            |
|                      | 2010-2014           | 33.0           | 13.7 - 52.3 | -                | -           | 23.9             | 2.1 - 45.6  | 78.0              | 59.1 - 96.9 | -              | -           | -                   | -            |
| Zhongshan            | 2000-2004           | 45.1           | 33.3 - 56.9 | 53.9             | 28.2 - 79.6 | 33.6             | 21.2 - 46.0 | 45.3              | 34.9 - 55.7 | 70.0           | 43.3 - 96.8 | -                   | -            |
|                      | 2005-2009           | 30.3           | 23.9 - 36.7 | 54.6             | 38.0 - 71.1 | 29.2             | 22.5 - 35.9 | 37.4              | 31.4 - 43.5 | 52.3           | 36.9 - 67.6 | 56.3                | 33.0 - 79.5  |
|                      | 2010-2014           | 38.8           | 31.0 - 46.7 | 33.7             | 16.9 - 50.5 | 29.6             | 23.3 - 35.9 | 39.5              | 33.3 - 45.6 | 54.6           | 38.7 - 70.5 | -                   | -            |
| Cyprus *             | 2000-2004           | 32.1 §         | 13.4 - 50.8 | -                | -           | 60.0 §           | 39.1 - 80.9 | 61.4 §            | 52.2 - 70.6 | -              | -           | -                   | -            |
|                      | 2005-2009           | 24.6 §         | 18.6 - 30.7 | -                | -           | 39.8 §           | 33.3 - 46.2 | 69.4 §            | 65.1 - 73.7 | 85.2 §         | 72.1 - 98.3 | 100.0 §             | 86.3 - 100.0 |
|                      | 2010-2014           | 25.2 §         | 19.5 - 31.0 | -                | -           | 36.0 §           | 30.2 - 41.9 | 65.7 §            | 61.8 - 69.6 | 86.6 §         | 78.2 - 95.0 | -                   | -            |
| Hong Kong *          | 2000-2004           | -              | -           | -                | -           | -                | -           | -                 | -           | -              | -           | -                   | -            |
|                      | 2005-2009           | -              | -           | -                | -           | -                | -           | -                 | -           | -              | -           | -                   | -            |
|                      | 2010-2014           | -              | -           | -                | -           | -                | -           | -                 | -           | -              | -           | -                   | -            |
| India (2 registries) | 2000-2004           | 22.4 §         | 8.3 - 36.5  | -                | -           | 19.7             | 6.3 - 33.1  | 40.6              | 28.1 - 53.1 | 54.0           | 28.3 - 79.8 | -                   | -            |
|                      | 2005-2009           | 16.7           | 10.4 - 23.0 | -                | -           | 6.1              | 2.5 - 9.6   | 45.4              | 34.2 - 56.6 | 75.5           | 52.1 - 99.0 | -                   | -            |
|                      | 2010-2014           | 30.0           | 17.5 - 42.6 | -                | -           | 29.0             | 16.8 - 41.3 | 45.6              | 33.0 - 58.1 | -              | -           | -                   | -            |
| Guwahati             | 2000-2004           | -              | -           | -                | -           | -                | -           | -                 | -           | -              | -           | -                   | -            |
|                      | 2005-2009           | -              | -           | -                | -           | -                | -           | -                 | -           | -              | -           | -                   | -            |
|                      | 2010-2014           | -              | -           | -                | -           | -                | -           | -                 | -           | -              | -           | -                   | -            |
| Karunagappally       | 2000-2004           | 22.4 §         | 8.3 - 36.5  | -                | -           | 19.7             | 6.3 - 33.1  | 40.6              | 28.1 - 53.1 | 54.0           | 28.3 - 79.8 | -                   | -            |
|                      | 2005-2009           | 16.7           | 10.4 - 23.0 | -                | -           | 6.1              | 2.5 - 9.6   | 45.4              | 34.2 - 56.6 | 75.5           | 52.1 - 99.0 | -                   | -            |
|                      | 2010-2014           | 30.0           | 17.5 - 42.6 | -                | -           | 29.0             | 16.8 - 41.3 | 45.6              | 33.0 - 58.1 | -              | -           | -                   | -            |
| Iran (Golestan)      | 2000-2004           | -              | -           | -                | -           | -                | -           | -                 | -           | -              | -           | -                   | -            |
|                      | 2005-2009           | -              | -           | -                | -           | -                | -           | -                 | -           | -              | -           | -                   | -            |
|                      | 2010-2014           | -              | -           | -                | -           | -                | -           | -                 | -           | -              | -           | -                   | -            |
| Israel *             | 2000-2004           | 29.7           | 27.8 - 31.7 | 74.5             | 69.3 - 79.6 | 51.3             | 49.1 - 53.5 | 63.7              | 62.5 - 64.9 | 86.4           | 81.6 - 91.2 | 89.1                | 84.6 - 93.5  |
|                      | 2005-2009           | 32.3           | 30.4 - 34.3 | 72.0             | 67.2 - 76.9 | 43.9             | 41.9 - 46.0 | 65.2              | 64.1 - 66.3 | 86.7           | 82.2 - 91.2 | 90.8                | 87.3 - 94.3  |
|                      | 2010-2014           | 32.8           | 30.6 - 34.9 | 77.6             | 72.6 - 82.6 | 39.7             | 37.6 - 41.9 | 65.5              | 64.2 - 66.7 | 87.9           | 83.1 - 92.6 | 92.3                | 89.0 - 95.6  |

**Web-table 4.3: Age-standardised five-year net survival (NS, %): adults (15-99 years) and children (0-14 years) diagnosed with brain tumours, adults with myeloid or lymphoid malignancies, and children with acute lymphoblastic leukaemia or lymphoma, by continent, country, registry and calendar period of diagnosis (2000-2004, 2005-2009, 2010-2014)**

|                          | Period of diagnosis | Brain (adults) |             | Brain (children) |              | Myeloid (adults) |             | Lymphoid (adults) |             | ALL (children) |               | Lymphoma (children) |               |
|--------------------------|---------------------|----------------|-------------|------------------|--------------|------------------|-------------|-------------------|-------------|----------------|---------------|---------------------|---------------|
|                          |                     | NS (%)         | 95% CI      | NS (%)           | 95% CI       | NS (%)           | 95% CI      | NS (%)            | 95% CI      | NS (%)         | 95% CI        | NS (%)              | 95% CI        |
| Japan<br>(16 registries) | 2000-2004           | 27.9 §         | 26.3 - 29.5 | 65.3             | 59.2 - 71.5  | 24.8             | 23.4 - 26.1 | 47.5              | 46.3 - 48.7 | 79.7           | 74.9 - 84.4   | 86.0                | 80.2 - 91.7   |
|                          | 2005-2009           | 38.5 §         | 37.2 - 39.7 | 62.5             | 58.1 - 66.8  | 27.5             | 26.7 - 28.3 | 52.0              | 51.4 - 52.6 | 83.7           | 80.6 - 86.9   | 84.7                | 79.5 - 89.9   |
|                          | 2010-2014           | 46.3 §         | 44.9 - 47.7 | 69.6             | 64.4 - 74.7  | 33.3             | 32.4 - 34.3 | 57.3              | 56.5 - 58.0 | 87.6           | 84.2 - 91.0   | 89.6                | 84.2 - 95.0   |
| Aichi                    | 2000-2004           | 19.4 §         | 14.8 - 24.0 | 31.1 §           | 16.0 - 46.2  | 19.2             | 16.6 - 21.8 | 44.1 §            | 41.6 - 46.6 | 74.1           | 57.9 - 90.3   | 63.7                | 36.8 - 90.5   |
|                          | 2005-2009           | 38.2 §         | 35.3 - 41.1 | 48.4             | 39.3 - 57.4  | 24.1             | 22.4 - 25.8 | 49.4              | 48.1 - 50.8 | 83.0           | 76.2 - 89.7   | 80.5                | 70.1 - 91.0   |
|                          | 2010-2014           | 50.3 §         | 47.2 - 53.4 | 70.1             | 60.8 - 79.5  | 31.4             | 29.5 - 33.4 | 56.8              | 55.4 - 58.3 | 88.0           | 81.1 - 95.0   | 89.2                | 79.7 - 98.8   |
| Akita                    | 2000-2004           | -              | -           | -                | -            | -                | -           | -                 | -           | -              | -             | -                   | -             |
|                          | 2005-2009           | -              | -           | -                | -            | -                | -           | -                 | -           | -              | -             | -                   | -             |
|                          | 2010-2014           | 11.7 §         | 2.8 - 20.7  | -                | -            | 19.2 §           | 12.3 - 26.1 | 19.1 §            | 11.2 - 27.0 | -              | -             | -                   | -             |
| Ehime                    | 2000-2004           | -              | -           | -                | -            | -                | -           | -                 | -           | -              | -             | -                   | -             |
|                          | 2005-2009           | 55.3 §         | 48.5 - 62.1 | 75.1             | 54.6 - 95.5  | 30.6             | 26.2 - 35.1 | 58.5 §            | 55.2 - 61.8 | 93.8           | 82.3 - 100.0  | -                   | -             |
|                          | 2010-2014           | 68.0 §         | 60.0 - 75.9 | 65.7             | 34.6 - 96.8  | 38.8             | 32.6 - 45.1 | 63.0              | 58.6 - 67.4 | 100.0          | 100.0 - 100.0 | -                   | -             |
| Fukui                    | 2000-2004           | 20.2           | 8.4 - 32.0  | -                | -            | 25.0             | 17.4 - 32.7 | 47.4              | 41.7 - 53.1 | -              | -             | -                   | -             |
|                          | 2005-2009           | 41.0           | 30.9 - 51.1 | 46.0             | 21.6 - 70.3  | 38.6             | 33.2 - 44.0 | 58.3              | 54.6 - 62.0 | 85.8           | 68.1 - 100.0  | -                   | -             |
|                          | 2010-2014           | -              | -           | -                | -            | -                | -           | -                 | -           | -              | -             | -                   | -             |
| Gunma                    | 2000-2004           | 31.8 §         | 10.0 - 53.6 | -                | -            | 16.7             | 11.0 - 22.5 | 32.4 §            | 24.7 - 40.1 | -              | -             | -                   | -             |
|                          | 2005-2009           | 41.4 §         | 35.3 - 47.4 | 62.0             | 41.8 - 82.1  | 19.6             | 16.6 - 22.6 | 50.3 §            | 47.5 - 53.0 | 69.4           | 49.5 - 89.3   | -                   | -             |
|                          | 2010-2014           | 48.2 §         | 40.7 - 55.7 | 59.8 §           | 35.5 - 84.2  | 27.5 §           | 22.6 - 32.3 | 53.1 §            | 50.0 - 56.1 | 74.1           | 52.2 - 96.1   | -                   | -             |
| Hiroshima                | 2000-2004           | 43.3 §         | 33.7 - 52.9 | -                | -            | 30.8             | 25.5 - 36.0 | 55.7 §            | 51.3 - 60.2 | 100.0          | 69.2 - 100.0  | -                   | -             |
|                          | 2005-2009           | 41.5 §         | 36.7 - 46.3 | 74.9             | 62.0 - 87.9  | 29.5             | 26.5 - 32.5 | 59.3              | 57.3 - 61.3 | 79.2           | 66.7 - 91.7   | 77.9                | 56.7 - 99.2   |
|                          | 2010-2014           | -              | -           | -                | -            | -                | -           | -                 | -           | -              | -             | -                   | -             |
| Hyogo                    | 2000-2004           | -              | -           | -                | -            | -                | -           | -                 | -           | -              | -             | -                   | -             |
|                          | 2005-2009           | 39.3 §         | 35.0 - 43.6 | 50.0 §           | 33.2 - 66.9  | 24.4             | 22.2 - 26.5 | 48.5 §            | 46.6 - 50.4 | 71.5           | 59.9 - 83.1   | 84.7                | 65.8 - 100.0  |
|                          | 2010-2014           | 53.2 §         | 48.6 - 57.7 | 60.1 §           | 46.8 - 73.3  | 36.4             | 33.2 - 39.7 | 57.0 §            | 50.6 - 63.5 | 57.5           | 28.3 - 86.6   | -                   | -             |
| Ibaraki                  | 2000-2004           | -              | -           | -                | -            | -                | -           | -                 | -           | -              | -             | -                   | -             |
|                          | 2005-2009           | 33.2 §         | 27.8 - 38.6 | 83.1             | 66.0 - 100.0 | 24.8             | 21.9 - 27.8 | 47.4 §            | 45.0 - 49.8 | 94.9           | 84.2 - 100.0  | 74.8                | 49.7 - 99.9   |
|                          | 2010-2014           | 58.0 §         | 52.3 - 63.7 | 84.2             | 69.6 - 98.8  | 44.9             | 40.0 - 49.8 | 69.8 §            | 67.2 - 72.3 | 83.8           | 66.1 - 100.0  | -                   | -             |
| Kanagawa                 | 2000-2004           | 30.6 §         | 27.5 - 33.8 | 51.4 §           | 38.1 - 64.7  | 29.8             | 26.2 - 33.3 | 52.2              | 50.2 - 54.2 | 79.4           | 69.7 - 89.0   | 79.0                | 61.2 - 96.8   |
|                          | 2005-2009           | 33.3 §         | 30.1 - 36.5 | 68.7 §           | 56.0 - 81.3  | 30.3             | 27.7 - 32.8 | 57.2              | 55.6 - 58.7 | 72.8           | 60.7 - 84.9   | 85.8                | 71.2 - 100.0  |
|                          | 2010-2014           | 35.2 §         | 31.7 - 38.7 | 65.4 §           | 52.6 - 78.1  | 33.2             | 30.5 - 35.9 | 58.8              | 57.3 - 60.4 | 88.1           | 77.4 - 98.8   | 89.3                | 79.0 - 99.7   |
| Miyagi                   | 2000-2004           | 42.4 §         | 37.4 - 47.4 | 57.2             | 44.2 - 70.3  | 23.2             | 20.2 - 26.1 | 47.2              | 44.9 - 49.6 | 77.5           | 68.3 - 86.7   | -                   | -             |
|                          | 2005-2009           | 46.9 §         | 41.9 - 52.0 | 62.9             | 48.8 - 76.9  | 29.1             | 25.8 - 32.4 | 54.7              | 52.2 - 57.2 | 83.8           | 73.6 - 94.1   | 75.1                | 46.5 - 100.0  |
|                          | 2010-2014           | 47.9 §         | 37.6 - 58.1 | 22.2             | 7.7 - 36.8   | 29.2             | 22.8 - 35.5 | 57.2              | 52.4 - 62.1 | 85.4           | 72.4 - 98.4   | -                   | -             |
| Niigata                  | 2000-2004           | 24.4 §         | 19.4 - 29.5 | 61.4             | 46.5 - 76.3  | 27.2             | 24.0 - 30.4 | 41.3              | 39.0 - 43.6 | 84.4           | 74.5 - 94.2   | 100.0               | 81.5 - 100.0  |
|                          | 2005-2009           | 37.6 §         | 32.4 - 42.9 | 66.7             | 49.3 - 84.1  | 25.7             | 22.8 - 28.7 | 49.4              | 47.3 - 51.5 | 94.5           | 87.7 - 100.0  | 81.3                | 62.8 - 99.8   |
|                          | 2010-2014           | 46.8 §         | 41.3 - 52.4 | 67.1             | 50.0 - 84.2  | 31.0             | 27.7 - 34.2 | 57.4              | 55.1 - 59.7 | 90.0           | 79.4 - 100.0  | 91.7                | 84.5 - 98.8   |
| Osaka                    | 2000-2004           | 23.4 §         | 20.8 - 26.1 | 69.1             | 61.5 - 76.7  | 26.0 §           | 23.9 - 28.0 | 37.6 §            | 36.3 - 39.0 | 80.8           | 73.5 - 88.2   | 87.3                | 80.1 - 94.6   |
|                          | 2005-2009           | 31.4 §         | 28.4 - 34.4 | 67.0             | 58.2 - 75.7  | 26.3 §           | 24.4 - 28.2 | 47.8              | 46.4 - 49.2 | 84.0           | 77.1 - 90.8   | 92.7                | 85.3 - 100.0  |
|                          | 2010-2014           | -              | -           | -                | -            | -                | -           | -                 | -           | -              | -             | -                   | -             |
| Saga                     | 2000-2004           | -              | -           | -                | -            | -                | -           | -                 | -           | -              | -             | -                   | -             |
|                          | 2005-2009           | 38.4 §         | 28.8 - 48.0 | 61.6             | 36.4 - 86.7  | 45.5             | 40.2 - 50.8 | 49.7              | 46.1 - 53.4 | 83.4           | 63.2 - 100.0  | -                   | -             |
|                          | 2010-2014           | 70.8 §         | 63.6 - 78.1 | 61.6             | 36.4 - 86.7  | 45.3             | 37.9 - 52.6 | 59.0              | 53.1 - 64.8 | 70.0           | 34.5 - 100.0  | -                   | -             |
| Tochigi                  | 2000-2004           | -              | -           | -                | -            | -                | -           | -                 | -           | -              | -             | -                   | -             |
|                          | 2005-2009           | 40.2 §         | 35.1 - 45.3 | 57.2             | 36.7 - 77.7  | 26.2             | 22.9 - 29.6 | 52.3              | 49.6 - 55.1 | 88.9           | 78.2 - 99.7   | -                   | -             |
|                          | 2010-2014           | 49.1 §         | 41.6 - 56.7 | 68.8             | 53.1 - 84.6  | 45.9             | 41.2 - 50.5 | 64.7              | 61.4 - 68.1 | 94.9           | 90.3 - 99.5   | 100.0               | 100.0 - 100.0 |
| Yamagata                 | 2000-2004           | 7.8 §          | 2.0 - 13.7  | -                | -            | 21.8             | 15.5 - 28.1 | 45.9              | 40.5 - 51.3 | -              | -             | -                   | -             |
|                          | 2005-2009           | 47.1 §         | 41.0 - 53.2 | 62.5             | 39.7 - 85.3  | 28.2             | 24.1 - 32.4 | 47.2              | 44.1 - 50.3 | 100.0          | 100.0 - 100.0 | -                   | -             |
|                          | 2010-2014           | 55.4 §         | 49.1 - 61.7 | 59.4             | 41.4 - 77.5  | 33.3             | 28.4 - 38.1 | 55.8              | 52.5 - 59.0 | 92.9           | 79.9 - 100.0  | 91.7 §              | 76.8 - 100.0  |
| Yamanashi                | 2000-2004           | -              | -           | -                | -            | -                | -           | -                 | -           | -              | -             | -                   | -             |
|                          | 2005-2009           | 52.2 §         | 43.1 - 61.3 | -                | -            | 39.3             | 32.4 - 46.1 | 53.4              | 47.9 - 58.9 | -              | -             | -                   | -             |
|                          | 2010-2014           | 56.9 §         | 45.6 - 68.3 | -                | -            | 40.7             | 33.5 - 47.9 | 58.9              | 52.9 - 64.9 | 100.0          | 100.0 - 100.0 | -                   | -             |
| Jordan *                 | 2000-2004           | 55.8 §         | 49.0 - 62.6 | 73.5 §           | 65.7 - 81.3  | 57.1 §           | 48.1 - 66.1 | 76.0 §            | 69.4 - 82.6 | 75.4 §         | 69.7 - 81.2   | 92.4 §              | 88.1 - 96.6   |
|                          | 2005-2009           | 46.7 §         | 41.1 - 52.4 | 66.0 §           | 58.6 - 73.3  | 56.5 §           | 46.9 - 66.1 | 74.6 §            | 68.3 - 80.9 | 89.2 §         | 84.8 - 93.6   | 91.1 §              | 86.4 - 95.8   |
|                          | 2010-2014           | 32.9 §         | 26.8 - 39.0 | 57.3 §           | 49.9 - 64.8  | 42.5 §           | 35.3 - 49.6 | 65.1 §            | 60.3 - 69.9 | 88.0 §         | 83.1 - 92.8   | 87.0 §              | 81.4 - 92.6   |
| Korea *                  | 2000-2004           | 27.6           | 26.4 - 28.9 | 54.2             | 50.8 - 57.6  | 31.7             | 30.4 - 33.0 | 39.8              | 38.8 - 40.8 | 73.1           | 70.4 - 75.8   | 82.4                | 79.3 - 85.4   |
|                          | 2005-2009           | 31.9           | 30.8 - 33.0 | 61.4             | 58.1 - 64.7  | 41.5             | 40.5 - 42.5 | 47.5              | 46.7 - 48.4 | 78.6           | 76.1 - 81.0   | 83.0                | 80.0 - 85.9   |
|                          | 2010-2014           | 33.7           | 32.6 - 34.7 | 60.3             | 56.9 - 63.8  | 45.9             | 44.9 - 46.8 | 52.5              | 51.8 - 53.3 | 84.4           | 82.1 - 86.7   | 91.0                | 88.9 - 93.1   |
| Kuwait *                 | 2000-2004           | 30.3 §         | 19.1 - 41.5 | 47.1             | 24.4 - 69.8  | 38.6             | 27.1 - 50.0 | 52.1              | 42.9 - 61.2 | 76.1 §         | 65.7 - 86.5   | 93.0                | 86.2 - 99.8   |
|                          | 2005-2009           | 24.9           | 17.3 - 32.6 | 59.2             | 39.2 - 79.1  | 24.0             | 15.9 - 32.0 | 63.2              | 55.8 - 70.7 | 74.9           | 65.6 - 84.1   | 90.7                | 83.2 - 98.2   |
|                          | 2010-2014           | 31.8           | 23.2 - 40.4 | -                | -            | 25.6             | 17.7 - 33.6 | 68.2              | 59.5 - 76.9 | 88.4           | 80.6 - 96.2   | 96.3                | 91.4 - 100.0  |
| Malaysia (Penang)        | 2000-2004           | -              | -           | -                | -            | -                | -           | -                 | -           | -              | -             | -                   | -             |
|                          | 2005-2009           | 20.5           | 10.7 - 30.4 | 41.3 §           | 19.0 - 63.6  | 20.3             | 11.5 - 29.1 | 31.4              | 24.7 - 38.1 | 72.8 §         | 62.4 - 83.3   | 95.3 §              | 89.2 - 100.0  |
|                          | 2010-2014           | 28.3           | 14.7 - 42.0 | 63.4 §           | 45.7 - 81.2  | 29.6             | 21.2 - 38.0 | 51.3              | 39.6 - 63.1 | 82.3 §         | 72.0 - 92.5   | 85.0 §              | 66.2 - 100.0  |
| Mongolia *               | 2000-2004           | -              | -           | -                | -            | -                | -           | -                 | -           | -              | -             | -                   | -             |
|                          | 2005-2009           | -              | -           | -                | -            | -                | -           | -                 | -           | -              | -             | -                   | -             |
|                          | 2010-2014           | -              | -           | -                | -            | -                | -           | -                 | -           | -              | -             | -                   | -             |
| Qatar *                  | 2000-2004           | 52.9 §         | 34.0 - 71.9 | 11.1 §           | 0.0 - 27.1   | 63.8 §           | 49.8 - 77.7 | 46.5 §            | 34.5 - 58.4 | 67.3 §         | 44.3 - 90.3   | 69.0 §              | 52.6 - 85.4   |
|                          | 2005-2009           | 32.4 §         | 19.0 - 45.8 | -                | -            | 52.1 §           | 39.7 - 64.6 | 60.3 §            | 45.9 - 74.7 | 82.6 §         | 61.2 - 100.0  | 88.5 §              | 73.8 - 100.0  |
|                          | 2010-2014           | 36.1 §         | 20.5 - 51.7 | 65.5 §           | 34.5 - 96.5  | 56.9 §           | 42.0 - 71.9 | 75.0 §            | 58.8 - 91.2 | 100.0 §        | 100.0 - 100.0 | 95.3 §              | 87.3 - 100.0  |
| Singapore *              | 2000-2004           | 26.2           | 21.5 - 30.9 | 60.9             | 48.0 - 73.8  | 39.2             |             |                   |             |                |               |                     |               |

**Web-table 4.3: Age-standardised five-year net survival (NS, %): adults (15-99 years) and children (0-14 years) diagnosed with brain tumours, adults with myeloid or lymphoid malignancies, and children with acute lymphoblastic leukaemia or lymphoma, by continent, country, registry and calendar period of diagnosis (2000-2004, 2005-2009, 2010-2014)**

|                       | Period of diagnosis | Brain (adults) |             | Brain (children) |              | Myeloid (adults) |             | Lymphoid (adults) |             | ALL (children) |              | Lymphoma (children) |              |
|-----------------------|---------------------|----------------|-------------|------------------|--------------|------------------|-------------|-------------------|-------------|----------------|--------------|---------------------|--------------|
|                       |                     | NS (%)         | 95% CI      | NS (%)           | 95% CI       | NS (%)           | 95% CI      | NS (%)            | 95% CI      | NS (%)         | 95% CI       | NS (%)              | 95% CI       |
| Khon Kaen             | 2000-2004           | 25.3 §         | 16.1 - 34.6 | 41.0             | 21.2 - 60.8  | 19.8 §           | 12.4 - 27.2 | 25.6 §            | 19.5 - 31.8 | 67.2           | 57.2 - 77.1  | 76.4 §              | 49.3 - 100.0 |
|                       | 2005-2009           | 20.8           | 13.8 - 27.8 | 57.2             | 36.7 - 77.8  | 30.8             | 23.9 - 37.8 | 26.8              | 20.4 - 33.2 | 54.2           | 40.1 - 68.3  | -                   | -            |
|                       | 2010-2014           | 16.0           | 10.7 - 21.3 | 38.7             | 22.8 - 54.7  | 33.1             | 27.4 - 38.7 | 27.8              | 22.0 - 33.6 | 72.1           | 59.8 - 84.4  | -                   | -            |
| Lampang               | 2000-2004           | 26.7 §         | 14.0 - 39.4 | 30.1             | 4.5 - 55.7   | 18.9             | 11.1 - 26.8 | 28.4              | 22.4 - 34.3 | 61.1           | 41.6 - 80.5  | -                   | -            |
|                       | 2005-2009           | 28.8           | 17.4 - 40.1 | 50.1             | 21.2 - 78.9  | 17.1             | 10.3 - 23.8 | 23.6              | 18.8 - 28.4 | 65.3           | 46.3 - 84.3  | -                   | -            |
|                       | 2010-2014           | 15.1           | 8.5 - 21.7  | 52.4             | 24.0 - 80.8  | 21.5             | 15.5 - 27.6 | 32.7              | 26.4 - 39.1 | 93.4           | 87.5 - 99.3  | -                   | -            |
| Lamphun               | 2000-2004           | 28.6 §         | 11.6 - 45.5 | -                | -            | 30.2             | 17.1 - 43.3 | 40.6              | 27.7 - 53.5 | 40.2           | 12.2 - 68.2  | -                   | -            |
|                       | 2005-2009           | 31.8 §         | 20.0 - 43.6 | -                | -            | 27.6             | 16.8 - 38.4 | 34.7              | 26.3 - 43.0 | -              | -            | -                   | -            |
|                       | 2010-2014           | 38.0 §         | 28.1 - 47.9 | -                | -            | 33.2             | 21.0 - 45.3 | 40.2              | 32.6 - 47.9 | -              | -            | -                   | -            |
| Lopburi               | 2000-2004           | 13.3 §         | 5.0 - 21.5  | -                | -            | 14.9             | 9.3 - 20.4  | 22.5 §            | 15.5 - 29.4 | 49.0 §         | 25.0 - 72.9  | -                   | -            |
|                       | 2005-2009           | 26.9 §         | 15.9 - 37.8 | 27.6 §           | 3.7 - 51.6   | 21.2             | 14.5 - 27.9 | 28.0 §            | 21.2 - 34.7 | 71.4 §         | 48.1 - 94.7  | -                   | -            |
|                       | 2010-2014           | 27.1 §         | 14.2 - 40.0 | -                | -            | 25.4 §           | 16.5 - 34.4 | 30.3 §            | 22.5 - 38.1 | 65.2 §         | 40.4 - 90.0  | -                   | -            |
| Songkhla              | 2000-2004           | 20.7           | 13.7 - 27.6 | 23.9             | 6.7 - 41.1   | 10.1             | 5.3 - 15.0  | 27.6              | 22.3 - 32.9 | 61.3           | 49.2 - 73.5  | 50.2                | 23.5 - 77.0  |
|                       | 2005-2009           | 25.3           | 18.5 - 32.2 | 45.7             | 25.6 - 65.9  | 11.7             | 7.3 - 16.2  | 30.0              | 25.2 - 34.7 | 47.8           | 34.4 - 61.1  | 56.5                | 33.1 - 80.0  |
|                       | 2010-2014           | 14.1           | 9.5 - 18.6  | 53.8             | 29.5 - 78.2  | 14.4             | 10.0 - 18.9 | 32.0              | 27.3 - 36.7 | 55.5           | 38.9 - 72.0  | 75.2                | 56.8 - 93.5  |
| Turkey (9 registries) | 2000-2004           | 32.1 §         | 27.9 - 36.2 | 56.8             | 46.3 - 67.2  | 35.9 §           | 30.6 - 41.2 | 54.3 §            | 49.6 - 58.9 | 72.4           | 64.3 - 80.6  | 79.9                | 70.9 - 88.9  |
|                       | 2005-2009           | 34.0           | 32.4 - 35.6 | 61.1             | 56.2 - 66.0  | 49.0             | 46.8 - 51.2 | 50.3              | 48.7 - 51.8 | 78.7           | 74.9 - 82.6  | 85.0                | 81.4 - 88.7  |
|                       | 2010-2014           | 35.6           | 34.1 - 37.0 | 62.5             | 58.4 - 66.7  | 54.0             | 51.8 - 56.1 | 54.5              | 53.0 - 56.1 | 80.9           | 77.2 - 84.6  | 82.9                | 79.1 - 86.7  |
| Ankara                | 2000-2004           | -              | -           | -                | -            | -                | -           | -                 | -           | -              | -            | -                   | -            |
|                       | 2005-2009           | 39.6           | 36.2 - 43.0 | 56.1             | 48.4 - 63.8  | 44.3             | 39.1 - 49.6 | 57.8              | 54.4 - 61.1 | 85.0           | 78.5 - 91.6  | 87.5                | 82.4 - 92.5  |
|                       | 2010-2014           | 36.2           | 33.5 - 38.9 | 63.3             | 56.8 - 69.8  | 52.7             | 46.9 - 58.5 | 58.2              | 54.2 - 62.3 | 86.7           | 80.9 - 92.5  | 85.0                | 79.4 - 90.6  |
| Antalya               | 2000-2004           | -              | -           | -                | -            | -                | -           | -                 | -           | -              | -            | -                   | -            |
|                       | 2005-2009           | 29.0           | 25.2 - 32.9 | 63.7             | 51.3 - 76.1  | 54.7             | 49.8 - 59.6 | 46.1              | 42.0 - 50.3 | 76.0           | 67.1 - 84.9  | 88.6                | 75.9 - 100.0 |
|                       | 2010-2014           | 33.7           | 28.9 - 38.5 | 63.1             | 50.2 - 76.1  | 55.2             | 48.9 - 61.6 | 57.7              | 52.0 - 63.3 | 77.0           | 66.8 - 87.2  | 84.1                | 73.0 - 95.3  |
| Bursa                 | 2000-2004           | -              | -           | -                | -            | -                | -           | -                 | -           | -              | -            | -                   | -            |
|                       | 2005-2009           | 24.6           | 20.5 - 28.7 | 28.3 §           | 14.7 - 41.9  | 44.8             | 37.9 - 51.7 | 41.4              | 36.9 - 45.8 | 76.8           | 66.1 - 87.5  | 89.7                | 82.4 - 97.0  |
|                       | 2010-2014           | 26.9           | 21.5 - 32.2 | 29.5 §           | 16.5 - 42.5  | 50.8             | 44.3 - 57.3 | 41.3              | 33.8 - 48.7 | 76.9           | 66.0 - 87.8  | 87.0                | 76.5 - 97.5  |
| Edirne                | 2000-2004           | -              | -           | -                | -            | -                | -           | -                 | -           | -              | -            | -                   | -            |
|                       | 2005-2009           | 26.8           | 18.4 - 35.1 | -                | -            | 44.5             | 35.4 - 53.6 | 45.1              | 36.8 - 53.5 | 68.8           | 46.9 - 90.7  | -                   | -            |
|                       | 2010-2014           | 22.0           | 8.4 - 35.6  | -                | -            | 63.8             | 49.7 - 77.9 | 52.2              | 43.3 - 61.1 | -              | -            | -                   | -            |
| Erzurum               | 2000-2004           | -              | -           | -                | -            | -                | -           | -                 | -           | -              | -            | -                   | -            |
|                       | 2005-2009           | 48.9           | 40.9 - 56.9 | 73.5             | 51.9 - 95.0  | 41.8             | 29.3 - 54.3 | 42.8              | 35.3 - 50.3 | 74.4           | 59.2 - 89.5  | 77.6                | 62.0 - 93.2  |
|                       | 2010-2014           | 33.0           | 22.3 - 43.8 | 83.6             | 63.4 - 100.0 | 57.8             | 45.1 - 70.4 | 53.6              | 44.5 - 62.6 | 77.6           | 61.0 - 94.3  | 75.2                | 54.7 - 95.7  |
| Eskisehir             | 2000-2004           | -              | -           | -                | -            | -                | -           | -                 | -           | -              | -            | -                   | -            |
|                       | 2005-2009           | 22.2           | 16.3 - 28.1 | -                | -            | -                | -           | 63.1              | 36.6 - 89.6 | -              | -            | -                   | -            |
|                       | 2010-2014           | 32.7           | 25.7 - 39.6 | -                | -            | -                | -           | -                 | -           | -              | -            | -                   | -            |
| Izmir                 | 2000-2004           | 32.1 §         | 27.9 - 36.2 | 56.8             | 46.3 - 67.2  | 35.9 §           | 30.6 - 41.2 | 54.3 §            | 49.6 - 58.9 | 72.4           | 64.3 - 80.6  | 79.9                | 70.9 - 88.9  |
|                       | 2005-2009           | 31.6           | 29.0 - 34.3 | 63.3             | 54.3 - 72.3  | 49.4             | 45.7 - 53.1 | 49.1              | 46.5 - 51.7 | 77.1           | 69.9 - 84.2  | 83.4                | 75.9 - 90.8  |
|                       | 2010-2014           | 34.0           | 31.2 - 36.9 | 68.3             | 59.4 - 77.2  | 57.6             | 53.7 - 61.5 | 51.9              | 49.1 - 54.8 | 81.4           | 74.2 - 88.6  | 83.9                | 75.0 - 92.7  |
| Samsun                | 2000-2004           | -              | -           | -                | -            | -                | -           | -                 | -           | -              | -            | -                   | -            |
|                       | 2005-2009           | 33.2           | 28.0 - 38.4 | 55.3             | 37.6 - 73.0  | 47.1             | 40.0 - 54.1 | 50.8              | 45.9 - 55.6 | 85.2           | 76.6 - 93.9  | 85.8                | 71.2 - 100.0 |
|                       | 2010-2014           | 34.8           | 28.5 - 41.2 | 74.6             | 61.5 - 87.7  | 54.0             | 44.7 - 63.3 | 56.6              | 50.0 - 63.2 | 76.0           | 63.7 - 88.3  | 84.8                | 65.9 - 100.0 |
| Trabzon               | 2000-2004           | -              | -           | -                | -            | -                | -           | -                 | -           | -              | -            | -                   | -            |
|                       | 2005-2009           | 47.8           | 40.3 - 55.2 | 81.9             | 60.2 - 100.0 | 55.8             | 48.2 - 63.5 | 49.9              | 43.4 - 56.5 | 72.6           | 52.6 - 92.6  | 78.6                | 58.0 - 99.2  |
|                       | 2010-2014           | 45.3           | 34.0 - 56.7 | 55.5             | 26.5 - 84.5  | 54.5             | 45.3 - 63.7 | 51.7              | 43.2 - 60.2 | 90.6           | 78.3 - 100.0 | 72.9                | 47.9 - 97.9  |
| EUROPE                |                     |                |             |                  |              |                  |             |                   |             |                |              |                     |              |
| Austria *             | 2000-2004           | 24.2           | 22.6 - 25.9 | -                | -            | 25.0             | 23.1 - 26.8 | 57.6              | 56.5 - 58.7 | -              | -            | -                   | -            |
|                       | 2005-2009           | 28.5           | 26.9 - 30.1 | -                | -            | 29.6             | 27.7 - 31.5 | 62.2              | 61.1 - 63.3 | -              | -            | -                   | -            |
|                       | 2010-2014           | 26.3           | 24.7 - 27.9 | -                | -            | 32.0             | 30.1 - 34.0 | 63.3              | 62.3 - 64.4 | -              | -            | -                   | -            |
| Belarus (Childhood) † | 2000-2004           | -              | -           | 66.1             | 59.8 - 72.3  | -                | -           | -                 | -           | 78.5           | 73.0 - 83.9  | 86.5                | 80.7 - 92.3  |
|                       | 2005-2009           | -              | -           | 70.4             | 64.0 - 76.8  | -                | -           | -                 | -           | 87.0           | 81.9 - 92.2  | 84.6                | 77.0 - 92.2  |
|                       | 2010-2014           | -              | -           | 68.5             | 61.6 - 75.5  | -                | -           | -                 | -           | 86.6           | 81.7 - 91.5  | 85.2                | 78.0 - 92.4  |
| Belgium *             | 2000-2004           | 31.5           | 28.5 - 34.5 | 84.1             | 75.6 - 92.6  | 49.7             | 46.7 - 52.7 | 65.5              | 63.6 - 67.4 | 80.4           | 69.8 - 91.0  | 94.2                | 87.9 - 100.0 |
|                       | 2005-2009           | 31.9           | 30.6 - 33.2 | 75.2             | 70.3 - 80.1  | 53.2             | 51.9 - 54.5 | 68.0              | 67.2 - 68.8 | 90.5           | 87.0 - 94.1  | 95.6                | 92.9 - 98.2  |
|                       | 2010-2014           | 31.2           | 29.9 - 32.5 | 74.5             | 70.2 - 78.9  | 55.4             | 54.2 - 56.5 | 70.6              | 69.8 - 71.4 | 90.8           | 87.3 - 94.3  | 95.4                | 92.7 - 98.1  |
| Bulgaria *            | 2000-2004           | -              | -           | -                | -            | 29.9 §           | 27.2 - 32.6 | 38.1              | 36.1 - 40.0 | 63.5           | 55.5 - 71.5  | 70.7                | 62.2 - 79.2  |
|                       | 2005-2009           | -              | -           | -                | -            | 40.1             | 37.6 - 42.6 | 39.9              | 38.1 - 41.6 | 74.8           | 68.4 - 81.1  | 74.3                | 64.9 - 83.7  |
|                       | 2010-2014           | -              | -           | -                | -            | 41.6 §           | 39.2 - 44.1 | 43.5              | 41.8 - 45.2 | 78.3           | 71.7 - 84.9  | 87.7                | 80.6 - 94.9  |
| Croatia *             | 2000-2004           | 37.0           | 35.1 - 38.8 | 65.7             | 58.3 - 73.1  | 31.1             | 28.6 - 33.6 | 42.7              | 41.0 - 44.4 | 81.7           | 74.3 - 89.1  | 76.6                | 66.8 - 86.3  |
|                       | 2005-2009           | 39.6           | 37.8 - 41.5 | 75.2             | 67.9 - 82.5  | 29.2             | 26.8 - 31.6 | 51.0              | 49.3 - 52.6 | 86.7           | 81.1 - 92.3  | 84.6                | 76.2 - 93.0  |
|                       | 2010-2014           | 42.2           | 40.4 - 44.0 | 73.4             | 65.6 - 81.3  | 32.2             | 29.7 - 34.7 | 52.7              | 51.1 - 54.3 | 85.2           | 79.1 - 91.3  | 94.5                | 89.1 - 99.9  |
| Czech Republic *      | 2000-2004           | 19.5           | 18.2 - 20.8 | 55.6             | 47.9 - 63.3  | 19.9             | 18.2 - 21.7 | 49.9              | 48.8 - 51.0 | 88.0           | 82.9 - 93.1  | 89.0                | 82.7 - 95.3  |
|                       | 2005-2009           | 22.1           | 20.8 - 23.4 | 64.3             | 57.4 - 71.3  | 33.5             | 31.8 - 35.1 | 53.2              | 52.2 - 54.3 | 90.3           | 85.6 - 95.0  | 82.9                | 73.2 - 92.5  |
|                       | 2010-2014           | 21.4           | 20.1 - 22.7 | 69.7             | 63.2 - 76.2  | 36.8             | 35.2 - 38.5 | 57.2              | 56.1 - 58.2 | 88.2           | 82.1 - 94.3  | 89.6                | 82.5 - 96.6  |
| Denmark *             | 2000-2004           | 30.5           | 28.8 - 32.2 | 68.8             | 62.1 - 75.5  | 35.7             | 33.6 - 37.8 | 57.7              | 56.4 - 59.0 | 84.3           | 78.6 - 90.0  | 90.2                | 82.2 - 98.2  |
|                       | 2005-2009           | 35.1           | 33.4 - 36.7 | 79.4             | 72.9 - 85.8  | 45.0             | 43.0 - 47.0 | 66.9              | 65.7 - 68.0 | 93.1           | 88.4 - 97.7  | 90.0                | 83.1 - 97.0  |
|                       | 2010-2014           | 38.9           | 37.3 - 40.6 | 79.5             | 73.3 - 85.6  | 47.6             | 45.7 - 49.6 | 70.9              | 69.8 - 72.1 | 94.0           | 90.1 - 97.9  | 93.8                | 89.0 - 98.7  |
| Estonia *             | 2000-2004           | 25.2           | 21.4 - 29.0 | 81.2             | 69.9 - 92.5  | 36.6             | 31.6 - 41.6 | 48.8              | 45.6 - 52.0 | 63.7           | 51.0 - 76.4  | 88.3                | 73.4 - 100.0 |
|                       | 2005-2009           | 26.1           | 22.6 - 29.6 | 72.3             | 57.9 - 86.7  | 42.4             | 38.1 - 46.8 | 53.5              | 50.6 - 56.4 | 85.4           | 73.6 - 97.1  | 85.8                | 68.1 - 100.0 |
|                       | 2010-2014           | 31.0           | 26.1 - 36.0 | 64.5             | 47.3 - 81.8  | 37.8             | 32.1 - 43.5 | 53.8              | 50.2 -      |                |              |                     |              |

**Web-table 4.3: Age-standardised five-year net survival (NS, %): adults (15-99 years) and children (0-14 years) diagnosed with brain tumours, adults with myeloid or lymphoid malignancies, and children with acute lymphoblastic leukaemia or lymphoma, by continent, country, registry and calendar period of diagnosis (2000-2004, 2005-2009, 2010-2014)**

|                                   | Period of diagnosis | Brain (adults) |             | Brain (children) |             | Myeloid (adults) |             | Lymphoid (adults) |             | ALL (children) |              | Lymphoma (children) |              |
|-----------------------------------|---------------------|----------------|-------------|------------------|-------------|------------------|-------------|-------------------|-------------|----------------|--------------|---------------------|--------------|
|                                   |                     | NS (%)         | 95% CI      | NS (%)           | 95% CI      | NS (%)           | 95% CI      | NS (%)            | 95% CI      | NS (%)         | 95% CI       | NS (%)              | 95% CI       |
| Burgundy Digestive                | 2000-2004           | -              | -           | -                | -           | -                | -           | -                 | -           | -              | -            | -                   | -            |
|                                   | 2005-2009           | -              | -           | -                | -           | -                | -           | -                 | -           | -              | -            | -                   | -            |
|                                   | 2010-2014           | -              | -           | -                | -           | -                | -           | -                 | -           | -              | -            | -                   | -            |
| Calvados                          | 2000-2004           | <b>13.4</b>    | 8.1 - 18.6  | -                | -           | <b>50.5</b>      | 42.0 - 58.9 | <b>64.3</b>       | 58.2 - 70.4 | -              | -            | -                   | -            |
|                                   | 2005-2009           | <b>14.1</b>    | 9.1 - 19.0  | -                | -           | -                | -           | -                 | -           | -              | -            | -                   | -            |
|                                   | 2010-2014           | <b>24.7</b>    | 15.9 - 33.6 | -                | -           | -                | -           | -                 | -           | -              | -            | -                   | -            |
| Calvados Digestive                | 2000-2004           | -              | -           | -                | -           | -                | -           | -                 | -           | -              | -            | -                   | -            |
|                                   | 2005-2009           | -              | -           | -                | -           | -                | -           | -                 | -           | -              | -            | -                   | -            |
|                                   | 2010-2014           | -              | -           | -                | -           | -                | -           | -                 | -           | -              | -            | -                   | -            |
| Côte-d'Or Gynaecologic            | 2000-2004           | -              | -           | -                | -           | -                | -           | -                 | -           | -              | -            | -                   | -            |
|                                   | 2005-2009           | -              | -           | -                | -           | -                | -           | -                 | -           | -              | -            | -                   | -            |
|                                   | 2010-2014           | -              | -           | -                | -           | -                | -           | -                 | -           | -              | -            | -                   | -            |
| Côte-d'Or Haematopoietic          | 2000-2004           | -              | -           | -                | -           | <b>56.1</b>      | 50.3 - 61.8 | <b>65.3</b>       | 61.8 - 68.8 | -              | -            | -                   | -            |
|                                   | 2005-2009           | -              | -           | -                | -           | <b>55.7</b>      | 50.3 - 61.0 | <b>76.2</b>       | 73.1 - 79.4 | -              | -            | -                   | -            |
|                                   | 2010-2014           | -              | -           | -                | -           | <b>55.2</b>      | 45.3 - 65.1 | <b>79.8</b>       | 73.5 - 86.2 | -              | -            | -                   | -            |
| Doubs                             | 2000-2004           | <b>18.5</b>    | 12.9 - 24.0 | -                | -           | <b>48.6</b>      | 43.0 - 54.1 | <b>64.9</b>       | 61.0 - 68.7 | -              | -            | -                   | -            |
|                                   | 2005-2009           | <b>24.9</b>    | 18.9 - 30.8 | -                | -           | <b>56.7</b>      | 51.5 - 61.9 | <b>72.8</b>       | 69.2 - 76.4 | -              | -            | -                   | -            |
|                                   | 2010-2014           | <b>23.2</b>    | 11.3 - 35.2 | -                | -           | <b>56.4</b>      | 45.0 - 67.7 | <b>71.7</b>       | 64.6 - 78.8 | -              | -            | -                   | -            |
| Finistère                         | 2000-2004           | -              | -           | -                | -           | -                | -           | -                 | -           | -              | -            | -                   | -            |
|                                   | 2005-2009           | -              | -           | -                | -           | -                | -           | -                 | -           | -              | -            | -                   | -            |
|                                   | 2010-2014           | -              | -           | -                | -           | -                | -           | -                 | -           | -              | -            | -                   | -            |
| Gironde                           | 2000-2004           | -              | -           | -                | -           | -                | -           | -                 | -           | -              | -            | -                   | -            |
|                                   | 2005-2009           | -              | -           | -                | -           | -                | -           | -                 | -           | -              | -            | -                   | -            |
|                                   | 2010-2014           | -              | -           | -                | -           | -                | -           | -                 | -           | -              | -            | -                   | -            |
| Gironde CNS                       | 2000-2004           | <b>24.6</b>    | 20.9 - 28.3 | -                | -           | -                | -           | -                 | -           | -              | -            | -                   | -            |
|                                   | 2005-2009           | <b>34.5</b>    | 30.9 - 38.2 | -                | -           | -                | -           | -                 | -           | -              | -            | -                   | -            |
|                                   | 2010-2014           | <b>32.2</b>    | 25.7 - 38.8 | -                | -           | -                | -           | -                 | -           | -              | -            | -                   | -            |
| Gironde Haematopoietic            | 2000-2004           | -              | -           | -                | -           | <b>49.8</b>      | 45.5 - 54.1 | <b>65.7</b>       | 62.7 - 68.6 | -              | -            | -                   | -            |
|                                   | 2005-2009           | -              | -           | -                | -           | <b>56.0</b>      | 52.6 - 59.3 | <b>70.9</b>       | 68.7 - 73.2 | -              | -            | -                   | -            |
|                                   | 2010-2014           | -              | -           | -                | -           | <b>59.4</b>      | 52.2 - 66.6 | <b>72.9</b>       | 68.2 - 77.6 | -              | -            | -                   | -            |
| Haut-Rhin                         | 2000-2004           | <b>19.7</b>    | 14.5 - 24.9 | -                | -           | <b>43.9</b>      | 37.9 - 49.8 | <b>63.9</b>       | 60.5 - 67.2 | -              | -            | -                   | -            |
|                                   | 2005-2009           | <b>23.1</b>    | 18.0 - 28.2 | -                | -           | <b>50.0</b>      | 45.3 - 54.7 | <b>67.8</b>       | 64.6 - 71.0 | -              | -            | -                   | -            |
|                                   | 2010-2014           | <b>18.9</b>    | 8.3 - 29.4  | -                | -           | <b>64.2</b>      | 54.0 - 74.4 | <b>64.0</b>       | 57.4 - 70.6 | -              | -            | -                   | -            |
| Haute-Vienne                      | 2000-2004           | -              | -           | -                | -           | -                | -           | -                 | -           | -              | -            | -                   | -            |
|                                   | 2005-2009           | 6.1            | 0.0 - 14.0  | -                | -           | 58.7             | 44.1 - 73.3 | 80.1              | 72.5 - 87.7 | -              | -            | -                   | -            |
|                                   | 2010-2014           | -              | -           | -                | -           | -                | -           | -                 | -           | -              | -            | -                   | -            |
| Hérault                           | 2000-2004           | <b>21.9</b>    | 17.3 - 26.5 | -                | -           | <b>52.6</b>      | 48.4 - 56.9 | <b>63.0</b>       | 60.2 - 65.9 | -              | -            | -                   | -            |
|                                   | 2005-2009           | <b>21.8</b>    | 17.4 - 26.2 | -                | -           | <b>55.4</b>      | 51.3 - 59.5 | <b>66.4</b>       | 63.6 - 69.2 | -              | -            | -                   | -            |
|                                   | 2010-2014           | <b>19.9</b>    | 11.5 - 28.3 | -                | -           | <b>53.1</b>      | 44.8 - 61.4 | <b>67.1</b>       | 61.3 - 72.9 | -              | -            | -                   | -            |
| Isère                             | 2000-2004           | <b>23.4</b>    | 19.5 - 27.4 | -                | -           | <b>52.2</b>      | 48.1 - 56.3 | <b>65.8</b>       | 63.2 - 68.4 | -              | -            | -                   | -            |
|                                   | 2005-2009           | <b>29.1</b>    | 25.3 - 32.9 | -                | -           | <b>49.7</b>      | 45.6 - 53.8 | <b>71.0</b>       | 68.5 - 73.5 | -              | -            | -                   | -            |
|                                   | 2010-2014           | <b>29.3</b>    | 21.0 - 37.5 | -                | -           | <b>62.7</b>      | 54.3 - 71.2 | <b>69.7</b>       | 64.6 - 74.8 | -              | -            | -                   | -            |
| Lille Metro                       | 2000-2004           | -              | -           | -                | -           | -                | -           | -                 | -           | -              | -            | -                   | -            |
|                                   | 2005-2009           | <b>23.6</b>    | 17.3 - 29.9 | -                | -           | <b>49.4</b>      | 42.8 - 56.0 | <b>70.8</b>       | 64.1 - 77.5 | -              | -            | -                   | -            |
|                                   | 2010-2014           | -              | -           | -                | -           | -                | -           | -                 | -           | -              | -            | -                   | -            |
| Loire-Atlantique                  | 2000-2004           | <b>17.2</b>    | 13.8 - 20.5 | -                | -           | <b>54.9</b>      | 51.4 - 58.5 | <b>68.6</b>       | 66.7 - 70.4 | -              | -            | -                   | -            |
|                                   | 2005-2009           | <b>26.3</b>    | 23.2 - 29.5 | -                | -           | <b>52.9</b>      | 49.5 - 56.3 | <b>71.0</b>       | 69.1 - 72.8 | -              | -            | -                   | -            |
|                                   | 2010-2014           | <b>24.8</b>    | 18.3 - 31.2 | -                | -           | <b>53.0</b>      | 46.0 - 59.9 | <b>67.9</b>       | 64.0 - 71.8 | -              | -            | -                   | -            |
| Manche                            | 2000-2004           | <b>26.0</b>    | 19.3 - 32.6 | -                | -           | <b>48.4</b>      | 39.2 - 57.6 | <b>63.9</b>       | 57.9 - 69.9 | -              | -            | -                   | -            |
|                                   | 2005-2009           | <b>35.1</b>    | 28.9 - 41.2 | -                | -           | -                | -           | -                 | -           | -              | -            | -                   | -            |
|                                   | 2010-2014           | <b>56.8</b>    | 46.8 - 66.8 | -                | -           | -                | -           | -                 | -           | -              | -            | -                   | -            |
| Somme                             | 2000-2004           | <b>19.9</b>    | 13.8 - 26.0 | -                | -           | <b>55.8</b>      | 49.7 - 61.9 | <b>57.3</b>       | 53.7 - 61.0 | -              | -            | -                   | -            |
|                                   | 2005-2009           | <b>25.8</b>    | 18.7 - 33.0 | -                | -           | <b>52.3</b>      | 46.8 - 57.7 | <b>64.6</b>       | 60.6 - 68.5 | -              | -            | -                   | -            |
|                                   | 2010-2014           | <b>28.7</b>    | 16.9 - 40.4 | -                | -           | <b>50.4</b>      | 39.5 - 61.3 | <b>65.2</b>       | 57.0 - 73.3 | -              | -            | -                   | -            |
| Tarn                              | 2000-2004           | <b>12.3</b>    | 6.2 - 18.5  | -                | -           | <b>59.8</b>      | 53.5 - 66.2 | <b>66.5</b>       | 62.2 - 70.8 | -              | -            | -                   | -            |
|                                   | 2005-2009           | <b>31.6</b>    | 24.4 - 38.8 | -                | -           | <b>56.8</b>      | 50.7 - 62.9 | <b>69.4</b>       | 65.4 - 73.5 | -              | -            | -                   | -            |
|                                   | 2010-2014           | <b>44.0</b>    | 34.9 - 53.1 | -                | -           | <b>58.8</b>      | 47.7 - 70.0 | <b>76.4</b>       | 67.2 - 85.5 | -              | -            | -                   | -            |
| France Childhood Haematopoietic † | 2000-2004           | -              | -           | -                | -           | -                | -           | -                 | -           | <b>88.1</b>    | 86.4 - 89.8  | <b>92.7</b>         | 90.8 - 94.6  |
|                                   | 2005-2009           | -              | -           | -                | -           | -                | -           | -                 | -           | <b>90.0</b>    | 88.4 - 91.6  | <b>92.6</b>         | 90.6 - 94.6  |
|                                   | 2010-2014           | -              | -           | -                | -           | -                | -           | -                 | -           | <b>88.6</b>    | 86.5 - 90.8  | <b>94.2</b>         | 92.0 - 96.4  |
| France Childhood Solid †          | 2000-2004           | -              | -           | <b>67.2</b>      | 65.0 - 69.5 | -                | -           | -                 | -           | -              | -            | -                   | -            |
|                                   | 2005-2009           | -              | -           | <b>70.8</b>      | 68.6 - 73.0 | -                | -           | -                 | -           | -              | -            | -                   | -            |
|                                   | 2010-2014           | -              | -           | <b>70.8</b>      | 68.1 - 73.5 | -                | -           | -                 | -           | -              | -            | -                   | -            |
| <b>Germany</b><br>(10 registries) | 2000-2004           | <b>29.1</b>    | 24.8 - 33.3 | <b>63.1</b>      | 56.0 - 70.2 | <b>46.0</b>      | 43.9 - 48.1 | <b>61.2</b>       | 60.4 - 62.0 | <b>94.0</b>    | 90.7 - 97.3  | <b>90.4</b>         | 84.2 - 96.5  |
|                                   | 2005-2009           | <b>27.3</b>    | 26.2 - 28.5 | <b>67.8</b>      | 61.1 - 74.6 | <b>51.9</b>      | 50.7 - 53.1 | <b>65.7</b>       | 65.1 - 66.3 | <b>92.1</b>    | 89.2 - 95.0  | <b>93.8</b>         | 88.9 - 98.8  |
|                                   | 2010-2014           | <b>29.6</b>    | 28.3 - 30.9 | <b>69.5</b>      | 61.8 - 77.2 | <b>54.9</b>      | 53.5 - 56.3 | <b>67.9</b>       | 67.3 - 68.6 | <b>91.1</b>    | 87.4 - 94.8  | <b>96.9</b>         | 94.2 - 99.6  |
| Brandenburg                       | 2000-2004           | <b>28.2</b> §  | 25.4 - 30.9 | -                | -           | <b>44.6</b> §    | 41.1 - 48.0 | <b>60.2</b>       | 58.2 - 62.2 | -              | -            | -                   | -            |
|                                   | 2005-2009           | <b>27.7</b>    | 25.0 - 30.4 | -                | -           | <b>45.4</b> §    | 42.5 - 48.4 | <b>65.5</b>       | 63.7 - 67.3 | -              | -            | -                   | -            |
|                                   | 2010-2014           | <b>29.6</b>    | 26.8 - 32.4 | -                | -           | <b>50.9</b> §    | 47.9 - 53.9 | <b>67.2</b>       | 65.4 - 68.9 | -              | -            | -                   | -            |
| Bremen                            | 2000-2004           | <b>28.8</b> §  | 22.8 - 34.8 | 42.9             | 18.4 - 67.4 | <b>43.9</b> §    | 38.7 - 49.1 | <b>58.1</b>       | 54.6 - 61.7 | 91.7 §         | 76.8 - 100.0 | -                   | -            |
|                                   | 2005-2009           | <b>24.2</b>    | 19.1 - 29.2 | 61.6             | 36.4 - 86.8 | <b>49.2</b>      | 44.2 - 54.2 | <b>60.3</b>       | 57.1 - 63.5 | 89.5           | 76.1 - 100.0 | -                   | -            |
|                                   | 2010-2014           | <b>26.4</b>    | 20.8 - 31.9 | -                | -           | <b>48.5</b>      | 43.1 - 53.9 | <b>61.1</b>       | 57.7 - 64.6 | -              | -            | -                   | -            |
| Hamburg                           | 2000-2004           | <b>24.6</b> §  | 21.0 - 28.3 | -                | -           | <b>51.3</b>      | 47.6 - 55.0 | <b>64.5</b>       | 62.1 - 66.9 | -              | -            | -                   | -            |
|                                   | 2005-2009           | <b>24.2</b>    | 20.6 - 27.8 | -                | -           | <b>54.4</b>      | 51.2 - 57.6 | <b>66.3</b>       | 64.3 - 68.3 | -              | -            | -                   | -            |
|                                   | 2010-2014           | <b>25.6</b>    | 21.4 - 29.8 | -                | -           | <b>55.8</b>      | 52.4 - 59.3 | <b>69.7</b>       | 67.4 - 72.0 | -              | -            | -                   | -            |
| Lower Saxony                      | 2000-2004           | <b>19.9</b> §  | 17.0 - 22.7 | <b>53.8</b>      | 40.3 - 67.3 | <b>48.5</b> §    | 45.9 - 51.1 | <b>65.3</b> §     | 63.6 - 67.0 | <b>88.5</b>    | 81.4 - 95.7  | <b>97.4</b>         | 94.0 - 100.0 |
|                                   | 2005-2009           | <b>23.6</b> §  | 21.9 - 25.3 | <b>65.9</b>      | 57.6 - 74.2 | <b>48.2</b> §    | 46.7 - 49.8 | <b>65.0</b> §     | 64.1 - 66.0 | <b>92.6</b>    | 89.1 - 96.1  | <b>96.4</b>         | 93.2 - 99.7  |
|                                   | 2010-2014           | <b>23.7</b> §  | 21.8 - 25.6 | <b>65.4</b>      | 55.8 - 74.9 | <b>48.3</b> §    | 46.7 - 49.9 | <b>65.9</b> §     | 64.8 - 67.0 | <b>91.2</b>    | 86.7 - 95.7  | <b>98.4</b>         | 96.3 - 100.0 |
| Mecklenburg-Western Pomerania     | 2000-2004           | <b>27.1</b> §  | 23.5 - 30.7 | -                | -           | <b>41.6</b> §    | 37.7 - 45.5 | <b>58.4</b>       | 56.0 - 60.7 | -              | -            | -                   | -            |
|                                   | 2005-2009           | <b>30.1</b>    | 26.6 - 33.6 | -                | -           | <b>47.9</b>      | 44.7 - 51.1 | <b>65.6</b>       | 63.5 - 67.7 | -              | -            | -                   | -            |
|                                   | 2010-2014           | <b>29.3</b>    | 25.8 - 32.9 | -                | -           | <b>52.0</b> §    | 48.6 - 55.3 | <b>68.5</b>       | 66.5 - 70.5 | -              | -            | -                   | -            |

**Web-table 4.3: Age-standardised five-year net survival (NS, %): adults (15-99 years) and children (0-14 years) diagnosed with brain tumours, adults with myeloid or lymphoid malignancies, and children with acute lymphoblastic leukaemia or lymphoma, by continent, country, registry and calendar period of diagnosis (2000-2004, 2005-2009, 2010-2014)**

|                             | Period of diagnosis | Brain (adults) |             | Brain (children) |              | Myeloid (adults) |             | Lymphoid (adults) |             | ALL (children) |               | Lymphoma (children) |               |
|-----------------------------|---------------------|----------------|-------------|------------------|--------------|------------------|-------------|-------------------|-------------|----------------|---------------|---------------------|---------------|
|                             |                     | NS (%)         | 95% CI      | NS (%)           | 95% CI       | NS (%)           | 95% CI      | NS (%)            | 95% CI      | NS (%)         | 95% CI        | NS (%)              | 95% CI        |
| Rhineland Palatinate        | 2000-2004           | 22.0 §         | 19.8 - 24.2 | 66.3             | 57.6 - 75.0  | 46.3             | 43.5 - 49.2 | 63.1              | 61.3 - 64.9 | 97.7           | 95.1 - 100.0  | 85.7                | 78.4 - 92.9   |
|                             | 2005-2009           | 23.0           | 20.8 - 25.2 | 78.8 §           | 71.6 - 85.9  | 51.5             | 49.0 - 54.0 | 64.9              | 63.3 - 66.4 | 94.2           | 89.7 - 98.7   | 87.6                | 80.3 - 94.9   |
|                             | 2010-2014           | 25.9 §         | 23.4 - 28.4 | 70.5 §           | 60.8 - 80.1  | 44.9 §           | 42.3 - 47.5 | 65.3 §            | 63.7 - 67.0 | 92.8 §         | 86.5 - 99.0   | 90.0 §              | 81.6 - 98.4   |
| Saarland                    | 2000-2004           | 29.1           | 24.8 - 33.3 |                  | -            | 25.4             | 20.4 - 30.3 | 61.7              | 58.7 - 64.8 | 90.1           | 72.4 - 100.0  |                     | -             |
|                             | 2005-2009           | 28.7           | 24.0 - 33.5 | 55.1             | 32.7 - 77.4  | 29.2 §           | 24.3 - 34.1 | 62.9              | 59.9 - 65.9 | 94.5           | 84.2 - 100.0  |                     | -             |
|                             | 2010-2014           | 27.1 §         | 20.9 - 33.3 |                  | -            | 25.8 §           | 20.5 - 31.2 | 62.9              | 59.4 - 66.4 | 92.4           | 78.4 - 100.0  |                     | -             |
| Saxony                      | 2000-2004           | 25.2 §         | 23.0 - 27.3 |                  | -            | 47.7 §           | 45.4 - 50.0 | 60.7              | 59.3 - 62.2 |                | -             |                     | -             |
|                             | 2005-2009           | 30.5           | 28.5 - 32.6 |                  | -            | 53.1             | 51.1 - 55.0 | 66.4              | 65.1 - 67.6 |                | -             |                     | -             |
|                             | 2010-2014           | 31.7           | 29.5 - 33.8 |                  | -            | 56.1             | 54.2 - 57.9 | 69.3              | 68.1 - 70.6 |                | -             |                     | -             |
| Schleswig-Holstein          | 2000-2004           | 24.0 §         | 21.2 - 26.8 | 62.5             | 39.7 - 85.3  | 41.8 §           | 38.8 - 44.7 | 64.0 §            | 62.4 - 65.6 | 93.8           | 82.3 - 100.0  |                     | -             |
|                             | 2005-2009           | 27.1 §         | 24.3 - 29.9 | 79.7             | 68.7 - 90.7  | 49.6 §           | 46.6 - 52.5 | 68.1              | 66.4 - 69.7 | 90.2           | 82.7 - 97.7   | 100.0               | 100.0 - 100.0 |
|                             | 2010-2014           | 33.0 §         | 29.3 - 36.8 | 82.6             | 72.1 - 93.1  | 53.3 §           | 49.5 - 57.2 | 70.0 §            | 68.0 - 72.1 | 82.8           | 72.6 - 93.1   | 100.0               | 100.0 - 100.0 |
| Thuringia                   | 2000-2004           | 25.1 §         | 22.2 - 28.0 |                  | -            | 50.2 §           | 46.9 - 53.6 | 62.3 §            | 60.2 - 64.4 |                | -             |                     | -             |
|                             | 2005-2009           | 28.7 §         | 25.7 - 31.7 |                  | -            | 46.1 §           | 43.3 - 48.9 | 65.4              | 63.6 - 67.3 |                | -             |                     | -             |
|                             | 2010-2014           | 29.9 §         | 27.0 - 32.9 |                  | -            | 48.3 §           | 45.4 - 51.1 | 67.9              | 66.0 - 69.8 |                | -             |                     | -             |
| Gibraltar *                 | 2000-2004           |                | -           |                  | -            |                  | -           |                   | -           |                | -             |                     | -             |
|                             | 2005-2009           |                | -           |                  | -            |                  | -           |                   | -           |                | -             |                     | -             |
|                             | 2010-2014           |                | -           |                  | -            |                  | -           |                   | -           |                | -             |                     | -             |
| Greek National Paediatric † | 2000-2004           |                | -           |                  | -            |                  | -           |                   | -           | 80.3           | 75.3 - 85.4   | 89.2                | 82.6 - 95.8   |
|                             | 2005-2009           |                | -           |                  | -            |                  | -           |                   | -           | 84.8           | 80.4 - 89.3   | 84.9                | 78.3 - 91.6   |
|                             | 2010-2014           |                | -           | 68.9             | 60.3 - 77.4  |                  | -           |                   | -           | 84.2           | 80.0 - 88.3   | 87.5                | 81.5 - 93.5   |
| Iceland *                   | 2000-2004           | 24.1           | 19.5 - 28.6 | 80.0             | 56.6 - 100.0 | 48.2             | 38.3 - 58.1 | 66.6              | 60.4 - 72.8 |                | -             |                     | -             |
|                             | 2005-2009           | 21.0           | 14.3 - 27.6 | 73.4             | 51.8 - 94.9  | 47.9             | 39.7 - 56.1 | 67.9              | 62.6 - 73.1 |                | -             |                     | -             |
|                             | 2010-2014           | 29.2           | 20.8 - 37.7 | 90.1             | 72.4 - 100.0 | 43.4             | 35.8 - 50.9 | 71.5              | 66.3 - 76.6 | 92.4           | 78.4 - 100.0  |                     | -             |
| Ireland *                   | 2000-2004           | 26.9           | 24.9 - 29.0 | 67.8             | 60.0 - 75.6  | 47.6             | 44.9 - 50.2 | 55.4              | 53.8 - 57.0 | 82.9           | 76.6 - 89.2   | 97.4                | 94.6 - 100.0  |
|                             | 2005-2009           | 30.8           | 28.7 - 33.0 | 68.6             | 61.1 - 76.1  | 52.5             | 50.1 - 55.0 | 64.2              | 62.7 - 65.7 | 87.1           | 80.9 - 93.4   | 96.2                | 92.0 - 100.0  |
|                             | 2010-2014           | 34.5           | 32.0 - 36.9 | 74.0             | 66.4 - 81.5  | 53.1             | 50.5 - 55.8 | 66.9              | 65.3 - 68.5 | 88.3           | 82.4 - 94.3   | 95.3                | 89.6 - 100.0  |
| Italy (45 registries)       | 2000-2004           | 24.1           | 23.2 - 25.1 | 68.5             | 64.5 - 72.5  | 46.4             | 45.5 - 47.3 | 58.5              | 57.9 - 59.0 | 82.6           | 79.2 - 86.0   | 88.3                | 84.9 - 91.8   |
|                             | 2005-2009           | 27.0           | 26.2 - 27.8 | 75.5             | 72.3 - 78.8  | 49.2             | 48.5 - 49.9 | 61.9              | 61.5 - 62.4 | 89.2           | 86.8 - 91.6   | 89.4                | 86.5 - 92.4   |
|                             | 2010-2014           | 28.8           | 27.8 - 29.9 | 74.8             | 70.4 - 79.2  | 49.2             | 48.2 - 50.2 | 62.6              | 61.9 - 63.2 | 87.8           | 84.4 - 91.2   | 91.6                | 87.4 - 95.7   |
| Alto Adige                  | 2000-2004           | 26.4           | 19.0 - 33.8 |                  | -            | 51.3             | 44.8 - 57.8 | 66.0              | 62.0 - 70.0 | 94.5           | 84.2 - 100.0  |                     | -             |
|                             | 2005-2009           | 30.2           | 24.6 - 35.8 |                  | -            | 48.1             | 42.3 - 53.9 | 67.8              | 64.1 - 71.5 | 94.2           | 83.3 - 100.0  | 80.0                | 56.6 - 100.0  |
|                             | 2010-2014           | 35.1           | 26.5 - 43.7 |                  | -            | 41.1             | 31.4 - 50.9 | 66.2              | 57.9 - 74.4 |                | -             |                     | -             |
| Barletta-Andria-Trani       | 2000-2004           |                | -           |                  | -            |                  | -           |                   | -           |                | -             |                     | -             |
|                             | 2005-2009           | 29.3           | 22.6 - 36.0 |                  | -            | 61.0             | 55.5 - 66.5 | 64.2              | 59.2 - 69.2 |                | -             |                     | -             |
|                             | 2010-2014           | 32.3           | 24.9 - 39.7 |                  | -            | 64.0             | 55.3 - 72.8 | 55.8              | 47.5 - 64.0 | 88.3           | 73.4 - 100.0  |                     | -             |
| Basilicata                  | 2000-2004           |                | -           |                  | -            |                  | -           |                   | -           |                | -             |                     | -             |
|                             | 2005-2009           | 29.4           | 24.4 - 34.4 |                  | -            | 56.2             | 51.9 - 60.4 | 63.8              | 59.9 - 67.7 |                | -             |                     | -             |
|                             | 2010-2014           | 14.6           | 5.5 - 23.7  |                  | -            | 52.9             | 42.7 - 63.1 | 63.4              | 55.9 - 70.9 |                | -             |                     | -             |
| Bergamo                     | 2000-2004           |                | -           |                  | -            |                  | -           |                   | -           |                | -             |                     | -             |
|                             | 2005-2009           | 21.2           | 15.8 - 26.7 | 94.1             | 83.3 - 100.0 | 33.4             | 28.1 - 38.7 | 59.4              | 56.4 - 62.4 | 93.4           | 81.1 - 100.0  | 100.0               | 100.0 - 100.0 |
|                             | 2010-2014           | 35.8           | 30.4 - 41.3 | 86.7             | 70.1 - 100.0 | 43.2             | 37.4 - 48.9 | 65.8              | 61.2 - 70.3 | 96.1           | 88.5 - 100.0  | 93.4                | 81.2 - 100.0  |
| Biella-Vercelli             | 2000-2004           | 21.4           | 14.0 - 28.8 |                  | -            | 51.0             | 43.7 - 58.3 | 56.7              | 51.4 - 61.9 |                | -             |                     | -             |
|                             | 2005-2009           | 29.5           | 22.8 - 36.3 |                  | -            | 58.3             | 53.0 - 63.6 | 68.3              | 64.5 - 72.2 |                | -             |                     | -             |
|                             | 2010-2014           | 44.2           | 36.9 - 51.5 |                  | -            | 54.6             | 45.1 - 64.1 | 65.6              | 57.2 - 74.0 |                | -             |                     | -             |
| Brescia                     | 2000-2004           | 20.6           | 16.1 - 25.1 | 56.6             | 36.9 - 76.3  | 32.2             | 27.5 - 37.0 | 59.1              | 56.6 - 61.6 | 91.7           | 80.9 - 100.0  | 100.0               | 81.5 - 100.0  |
|                             | 2005-2009           | 15.1           | 10.6 - 19.6 |                  | -            | 40.6             | 34.9 - 46.2 | 60.2              | 57.3 - 63.1 | 100.0          | 79.4 - 100.0  | 88.3                | 73.4 - 100.0  |
|                             | 2010-2014           |                | -           |                  | -            |                  | -           |                   | -           |                | -             |                     | -             |
| Brindisi                    | 2000-2004           |                | -           |                  | -            |                  | -           |                   | -           |                | -             |                     | -             |
|                             | 2005-2009           | 38.4           | 31.7 - 45.0 |                  | -            | 66.3             | 59.3 - 73.3 | 70.4              | 65.5 - 75.4 |                | -             |                     | -             |
|                             | 2010-2014           |                | -           |                  | -            |                  | -           |                   | -           |                | -             |                     | -             |
| Caserta                     | 2000-2004           |                | -           |                  | -            |                  | -           |                   | -           |                | -             |                     | -             |
|                             | 2005-2009           | 25.3           | 17.6 - 33.0 | 70.1 §           | 50.6 - 89.6  | 51.6             | 45.4 - 57.8 | 57.5              | 52.3 - 62.6 |                | -             | 84.7                | 65.9 - 100.0  |
|                             | 2010-2014           | 25.1           | 17.6 - 32.6 |                  | -            | 55.9             | 46.7 - 65.0 | 66.0              | 57.1 - 74.9 |                | -             |                     | -             |
| Catania-Messina-Enna        | 2000-2004           | 17.0           | 12.0 - 22.1 |                  | -            | 57.9             | 53.5 - 62.3 | 64.1              | 60.8 - 67.3 | 83.5           | 73.6 - 93.4   | 85.8                | 68.1 - 100.0  |
|                             | 2005-2009           | 20.0           | 16.6 - 23.4 | 66.6             | 50.0 - 83.2  | 54.2             | 51.5 - 56.9 | 63.0              | 61.0 - 65.0 | 87.1           | 78.6 - 95.6   | 92.6                | 84.8 - 100.0  |
|                             | 2010-2014           | 22.9           | 18.2 - 27.7 | 81.5 §           | 68.6 - 94.5  | 50.6             | 47.2 - 54.0 | 63.0              | 60.4 - 65.5 | 91.7           | 82.2 - 100.0  | 100.0               | 100.0 - 100.0 |
| Catanzaro                   | 2000-2004           | 12.5           | 2.5 - 22.4  |                  | -            | 60.7             | 49.0 - 72.4 | 58.5              | 50.8 - 66.1 |                | -             |                     | -             |
|                             | 2005-2009           | 29.9           | 22.5 - 37.4 |                  | -            | 60.4             | 54.5 - 66.2 | 60.9              | 56.5 - 65.4 | 93.0           | 80.0 - 100.0  |                     | -             |
|                             | 2010-2014           |                | -           |                  | -            |                  | -           |                   | -           |                | -             |                     | -             |
| Como                        | 2000-2004           | 26.0           | 17.9 - 34.1 |                  | -            | 50.8             | 43.4 - 58.2 | 57.6              | 52.5 - 62.7 |                | -             |                     | -             |
|                             | 2005-2009           | 17.8           | 12.5 - 23.2 | 61.6             | 36.4 - 86.7  | 40.2             | 35.2 - 45.1 | 58.0              | 54.8 - 61.2 | 89.5           | 76.1 - 100.0  | 72.8                | 47.8 - 97.7   |
|                             | 2010-2014           | 21.6           | 12.2 - 31.0 | 71.5             | 40.7 - 100.0 | 42.5             | 35.0 - 50.1 | 54.6              | 49.8 - 59.3 |                | -             |                     | -             |
| Cremona                     | 2000-2004           |                | -           |                  | -            |                  | -           |                   | -           |                | -             |                     | -             |
|                             | 2005-2009           | 29.3           | 21.3 - 37.2 |                  | -            | 54.2             | 47.4 - 61.1 | 56.4              | 52.1 - 60.6 |                | -             |                     | -             |
|                             | 2010-2014           | 36.9           | 21.4 - 52.4 |                  | -            | 36.6             | 26.4 - 46.9 | 54.9              | 46.2 - 63.6 |                | -             |                     | -             |
| Ferrara                     | 2000-2004           | 19.9           | 13.0 - 26.9 |                  | -            | 48.3             | 42.1 - 54.6 | 59.2              | 55.6 - 62.9 |                | -             |                     | -             |
|                             | 2005-2009           | 31.0           | 24.5 - 37.5 |                  | -            | 50.5             | 45.1 - 55.9 | 59.4              | 55.8 - 63.0 |                | -             |                     | -             |
|                             | 2010-2014           | 24.7           | 15.6 - 33.8 |                  | -            | 43.1             | 35.5 - 50.8 | 56.8              | 51.4 - 62.3 |                | -             |                     | -             |
| Friuli-Venezia-Giulia       | 2000-2004           | 17.3           | 13.2 - 21.3 | 61.6             | 41.3 - 81.9  | 24.6             | 20.4 - 28.8 | 57.4              | 55.2 - 59.7 | 78.6           | 68.2 - 89.1   | 89.8                | 76.6 - 100.0  |
|                             | 2005-2009           | 23.4           | 19.9 - 26.9 | 73.9             | 54.8 - 93.0  | 29.9             | 25.5 - 34.3 | 61.4              | 59.2 - 63.6 | 90.1           | 79.5 - 100.0  | 100.0               | 100.0 - 100.0 |
|                             | 2010-2014           | 22.8           | 14.9 - 30.7 |                  | -            | 27.8             | 18.9 - 36.7 | 63.9              | 59.0 - 68.8 |                | -             |                     | -             |
| Genoa                       | 2000-2004           | 29.7           | 25.5 - 33.9 | 81.9             | 66.1 - 97.6  | 53.9             | 50.6 - 57.2 | 56.4              | 54.1 - 58.7 | 83.4           | 66.7 - 100.0  | 91.0                | 74.8 - 100.0  |
|                             | 2005-2009           | 29.5           | 24.8 - 34.2 | 76.2             | 58.5 - 94.0  | 48.1             | 44.5 - 51.6 | 61.6              | 59.3 - 63.8 | 100.0          | 100.0 - 100.0 | 100.0               | 100.0 - 100.0 |
|                             | 2010-2014           |                | -           |                  | -            |                  | -           |                   | -           |                | -             |                     | -             |
| Latina                      | 2000-2004           | 30.1           | 23.4 - 36.8 | 60.0             | 36.3 - 83.8  | 48.7             | td          |                   |             |                |               |                     |               |

**Web-table 4.3: Age-standardised five-year net survival (NS, %): adults (15-99 years) and children (0-14 years) diagnosed with brain tumours, adults with myeloid or lymphoid malignancies, and children with acute lymphoblastic leukaemia or lymphoma, by continent, country, registry and calendar period of diagnosis (2000-2004, 2005-2009, 2010-2014)**

|               | Period of diagnosis | Brain (adults) |             | Brain (children) |              | Myeloid (adults) |             | Lymphoid (adults) |             | ALL (children) |               | Lymphoma (children) |               |
|---------------|---------------------|----------------|-------------|------------------|--------------|------------------|-------------|-------------------|-------------|----------------|---------------|---------------------|---------------|
|               |                     | NS (%)         | 95% CI      | NS (%)           | 95% CI       | NS (%)           | 95% CI      | NS (%)            | 95% CI      | NS (%)         | 95% CI        | NS (%)              | 95% CI        |
| Mantova       | 2000-2004           | 20.6           | 13.8 - 27.3 |                  | -            | 30.1             | 23.2 - 37.0 | 55.8              | 51.9 - 59.7 | 90.9           | 74.7 - 100.0  |                     | -             |
|               | 2005-2009           | 17.0           | 11.0 - 23.1 |                  | -            | 31.6             | 24.9 - 38.4 | 58.5              | 54.9 - 62.1 |                | -             |                     | -             |
|               | 2010-2014           | 12.0           | 1.6 - 22.4  |                  | -            | 31.9             | 18.4 - 45.4 | 61.6              | 53.5 - 69.6 |                | -             |                     | -             |
| Milano        | 2000-2004           | 24.2           | 20.1 - 28.3 | 72.8             | 54.7 - 90.9  | 45.2             | 41.9 - 48.4 | 57.2              | 55.2 - 59.2 | 89.4 §         | 80.9 - 97.8   | 84.2                | 68.3 - 100.0  |
|               | 2005-2009           | 24.9           | 22.4 - 27.5 | 75.0             | 64.4 - 85.7  | 50.4             | 48.0 - 52.7 | 62.6              | 61.2 - 64.1 | 95.5           | 91.3 - 99.7   | 88.0                | 78.3 - 97.7   |
|               | 2010-2014           | 28.8           | 25.0 - 32.6 | 74.5             | 59.7 - 89.2  | 53.5             | 50.3 - 56.6 | 64.1              | 61.9 - 66.2 | 95.6           | 89.7 - 100.0  | 93.3                | 82.9 - 100.0  |
| Modena        | 2000-2004           | 18.0           | 12.5 - 23.6 | 71.5             | 48.8 - 94.1  | 55.6             | 51.1 - 60.2 | 64.7              | 61.9 - 67.5 | 74.1           | 52.9 - 95.2   | 94.4                | 84.2 - 100.0  |
|               | 2005-2009           | 22.7           | 17.3 - 28.0 | 83.4             | 63.2 - 100.0 | 54.5             | 50.2 - 58.8 | 68.6              | 65.9 - 71.3 | 87.6           | 71.9 - 100.0  |                     | -             |
|               | 2010-2014           | 24.6           | 18.1 - 31.0 |                  | -            | 49.8             | 44.2 - 55.4 | 71.7              | 68.4 - 75.1 | 69.1           | 54.6 - 83.6   |                     | -             |
| Monza-Brianza | 2000-2004           |                | -           |                  | -            |                  | -           |                   | -           |                | -             |                     | -             |
|               | 2005-2009           | 28.4           | 22.2 - 34.5 |                  | -            | 43.3             | 37.9 - 48.6 | 60.9              | 57.6 - 64.1 | 90.9           | 74.7 - 100.0  |                     | -             |
|               | 2010-2014           | 37.0           | 28.6 - 45.4 | 80.0             | 60.5 - 99.5  | 55.7             | 50.2 - 61.2 | 64.8              | 60.5 - 69.1 | 47.1           | 0.6 - 93.5    |                     | -             |
| Naples        | 2000-2004           | 25.8           | 20.8 - 30.8 | 78.7             | 65.6 - 91.7  | 47.5             | 41.6 - 53.5 | 51.7              | 47.0 - 56.5 | 72.3           | 52.2 - 92.3   | 75.0                | 54.6 - 95.5   |
|               | 2005-2009           | 27.6           | 22.7 - 32.6 | 74.4             | 62.9 - 85.9  | 46.8             | 42.2 - 51.4 | 54.4              | 50.9 - 57.8 | 83.7           | 70.8 - 96.6   | 94.1                | 83.3 - 100.0  |
|               | 2010-2014           | 29.1           | 23.5 - 34.7 | 83.2             | 69.1 - 97.2  | 47.1             | 41.7 - 52.5 | 51.4              | 47.5 - 55.3 | 71.9           | 60.0 - 83.7   | 93.2                | 85.2 - 100.0  |
| Nuoro         | 2000-2004           | 5.8            | 0.0 - 12.8  |                  | -            | 49.2             | 35.6 - 62.8 | 59.2              | 51.1 - 67.3 |                | -             |                     | -             |
|               | 2005-2009           | 38.7           | 31.0 - 46.4 |                  | -            | 52.2             | 44.9 - 59.4 | 65.8              | 60.1 - 71.4 |                | -             |                     | -             |
|               | 2010-2014           | 45.8           | 36.9 - 54.7 |                  | -            | 49.8             | 41.1 - 58.5 | 63.7              | 56.6 - 70.8 |                | -             |                     | -             |
| Palermo       | 2000-2004           | 30.0           | 24.1 - 35.9 | 80.0             | 60.5 - 99.5  | 48.2             | 42.3 - 54.1 | 54.8              | 50.7 - 59.0 |                | -             |                     | -             |
|               | 2005-2009           | 37.5           | 33.5 - 41.6 | 85.7             | 75.3 - 96.0  | 43.2             | 39.5 - 47.0 | 61.3              | 58.6 - 64.1 | 89.7           | 81.7 - 97.7   | 95.5                | 87.0 - 100.0  |
|               | 2010-2014           | 31.2           | 26.5 - 36.0 | 72.4             | 54.8 - 90.0  | 45.2             | 40.5 - 50.0 | 64.1              | 60.7 - 67.5 | 84.1           | 69.8 - 98.5   | 95.3                | 87.3 - 100.0  |
| Parma         | 2000-2004           | 32.2           | 25.4 - 39.0 | 78.6             | 58.0 - 99.3  | 43.7             | 37.9 - 49.5 | 58.3              | 54.9 - 61.6 |                | -             |                     | -             |
|               | 2005-2009           | 30.9           | 24.9 - 37.0 | 68.4             | 43.9 - 92.9  | 41.5             | 36.5 - 46.5 | 62.9              | 59.6 - 66.1 | 90.0           | 72.4 - 100.0  |                     | -             |
|               | 2010-2014           | 36.0           | 29.8 - 42.3 |                  | -            | 48.4             | 43.4 - 53.5 | 68.2              | 64.9 - 71.4 | 91.7           | 79.4 - 100.0  |                     | -             |
| Pavia         | 2000-2004           | 16.1           | 6.8 - 25.4  |                  | -            | 32.1             | 22.9 - 41.3 | 56.1              | 51.2 - 61.0 |                | -             |                     | -             |
|               | 2005-2009           | 22.1           | 16.3 - 27.9 |                  | -            | 27.4             | 20.6 - 34.2 | 61.9              | 58.7 - 65.0 | 100.0 §        | 100.0 - 100.0 |                     | -             |
|               | 2010-2014           |                | -           |                  | -            |                  | -           |                   | -           |                | -             |                     | -             |
| Piacenza      | 2000-2004           |                | -           |                  | -            |                  | -           |                   | -           |                | -             |                     | -             |
|               | 2005-2009           | 44.5           | 36.5 - 52.4 |                  | -            | 63.1             | 56.9 - 69.3 | 64.5              | 60.0 - 69.0 |                | -             |                     | -             |
|               | 2010-2014           | 46.3           | 37.9 - 54.7 |                  | -            | 68.5             | 60.6 - 76.4 | 72.3              | 65.9 - 78.6 |                | -             |                     | -             |
| Ragusa        | 2000-2004           | 32.6           | 26.6 - 38.6 | 64.3             | 40.3 - 88.3  | 55.6             | 49.8 - 61.4 | 52.6              | 47.5 - 57.8 | 70.0           | 43.3 - 96.7   |                     | -             |
|               | 2005-2009           | 31.2           | 25.1 - 37.4 | 76.3             | 58.5 - 94.0  | 58.2             | 52.5 - 63.8 | 55.7              | 51.8 - 59.6 | 100.0          | 100.0 - 100.0 | 83.4                | 63.2 - 100.0  |
|               | 2010-2014           | 24.3           | 17.5 - 31.0 | 66.0             | 46.5 - 85.5  | 54.9             | 48.7 - 61.2 | 58.6              | 54.2 - 62.9 |                | -             |                     | -             |
| Reggio Emilia | 2000-2004           | 26.2           | 19.8 - 32.6 | 91.0 §           | 74.8 - 100.0 | 46.5             | 40.7 - 52.2 | 64.4              | 61.1 - 67.7 | 80.8           | 58.1 - 100.0  | 100.0               | 100.0 - 100.0 |
|               | 2005-2009           | 25.4           | 19.7 - 31.1 | 73.4             | 51.9 - 94.9  | 51.3             | 46.1 - 56.6 | 68.1              | 65.0 - 71.3 | 88.6           | 74.1 - 100.0  |                     | -             |
|               | 2010-2014           | 32.8           | 25.8 - 39.8 |                  | -            | 56.7             | 51.0 - 62.3 | 68.5              | 64.5 - 72.6 |                | -             | 88.9                | 69.6 - 100.0  |
| Romagna       | 2000-2004           | 26.3           | 22.5 - 30.2 | 64.3             | 50.0 - 78.5  | 34.0             | 29.8 - 38.1 | 61.2              | 59.1 - 63.4 | 84.0           | 74.2 - 93.8   | 91.7                | 80.9 - 100.0  |
|               | 2005-2009           | 38.7           | 35.3 - 42.1 | 74.1             | 61.2 - 87.0  | 55.0             | 52.1 - 57.9 | 63.0              | 61.0 - 65.0 | 86.4           | 72.4 - 100.0  | 88.3                | 73.4 - 100.0  |
|               | 2010-2014           | 41.4           | 37.3 - 45.5 | 88.6             | 75.4 - 100.0 | 53.9             | 50.5 - 57.3 | 65.2              | 62.7 - 67.7 | 100.0          | 100.0 - 100.0 | 100.0               | 100.0 - 100.0 |
| Salerno       | 2000-2004           | 22.0           | 17.9 - 26.0 | 56.0             | 37.1 - 75.0  | 48.2             | 43.8 - 52.6 | 54.4              | 51.7 - 57.2 | 88.0           | 77.1 - 98.9   | 90.6                | 78.3 - 100.0  |
|               | 2005-2009           | 25.7           | 21.4 - 29.9 | 79.2 §           | 63.3 - 95.1  | 52.7             | 49.0 - 56.4 | 59.3              | 56.5 - 62.0 | 90.8 §         | 80.9 - 100.0  | 93.4 §              | 84.6 - 100.0  |
|               | 2010-2014           |                | -           |                  | -            |                  | -           |                   | -           |                | -             |                     | -             |
| Sassari       | 2000-2004           | 19.5           | 12.9 - 26.2 |                  | -            | 35.5             | 29.3 - 41.8 | 56.0              | 52.2 - 59.8 |                | -             |                     | -             |
|               | 2005-2009           | 35.9           | 30.3 - 41.5 | 87.6             | 66.1 - 100.0 | 34.0             | 28.0 - 39.9 | 58.3              | 54.4 - 62.2 | 94.5           | 84.2 - 100.0  |                     | -             |
|               | 2010-2014           | 38.1           | 28.0 - 48.2 |                  | -            | 34.4             | 24.6 - 44.1 | 58.3              | 52.4 - 64.2 |                | -             |                     | -             |
| Siracusa      | 2000-2004           | 22.3           | 16.0 - 28.6 |                  | -            | 43.9             | 37.1 - 50.7 | 50.6              | 46.0 - 55.3 | 46.2           | 20.7 - 71.8   | 90.0                | 72.4 - 100.0  |
|               | 2005-2009           | 10.5           | 3.7 - 17.3  |                  | -            | 41.4             | 34.6 - 48.1 | 54.5              | 49.8 - 59.1 | 92.3           | 78.4 - 100.0  |                     | -             |
|               | 2010-2014           | 12.1           | 3.6 - 20.7  |                  | -            | 32.6             | 24.8 - 40.5 | 51.7              | 45.7 - 57.7 |                | -             |                     | -             |
| Sondrio       | 2000-2004           | 26.0           | 14.7 - 37.3 |                  | -            | 20.4             | 9.9 - 30.8  | 53.0              | 47.3 - 58.7 |                | -             |                     | -             |
|               | 2005-2009           | 14.8           | 4.1 - 25.5  |                  | -            | 32.0             | 20.3 - 43.7 | 59.2              | 53.5 - 64.9 |                | -             |                     | -             |
|               | 2010-2014           | 39.8           | 32.2 - 47.5 |                  | -            | 34.9             | 20.6 - 49.1 | 59.0              | 50.2 - 67.8 |                | -             |                     | -             |
| Taranto       | 2000-2004           |                | -           |                  | -            |                  | -           |                   | -           |                | -             |                     | -             |
|               | 2005-2009           | 36.6           | 30.5 - 42.7 | 78.1             | 59.6 - 96.6  | 45.1             | 40.2 - 49.9 | 60.6              | 56.7 - 64.6 | 85.7           | 68.1 - 100.0  | 94.5                | 84.2 - 100.0  |
|               | 2010-2014           | 29.8           | 21.8 - 37.8 |                  | -            | 48.2             | 40.5 - 55.9 | 57.4              | 51.1 - 63.7 |                | -             |                     | -             |
| Trapani       | 2000-2004           | 29.2           | 22.7 - 35.7 |                  | -            | 56.1             | 48.1 - 64.1 | 59.8              | 54.0 - 65.6 | 66.7           | 41.4 - 92.0   |                     | -             |
|               | 2005-2009           | 21.1           | 13.7 - 28.6 | 72.8             | 47.8 - 97.8  | 52.0             | 45.8 - 58.2 | 59.0              | 54.6 - 63.4 | 100.0          | 75.3 - 100.0  |                     | -             |
|               | 2010-2014           | 34.2           | 22.2 - 46.3 |                  | -            | 46.2             | 34.4 - 57.9 | 60.6              | 50.4 - 70.9 |                | -             |                     | -             |
| Trento        | 2000-2004           | 28.1           | 21.6 - 34.6 | 84.7             | 65.9 - 100.0 | 23.1             | 17.1 - 29.2 | 57.9              | 54.0 - 61.7 | 95.3           | 86.4 - 100.0  |                     | -             |
|               | 2005-2009           | 28.9           | 22.4 - 35.4 | 60.0             | 31.6 - 88.4  | 36.3             | 29.8 - 42.9 | 59.3              | 55.7 - 62.9 | 100.0          | 100.0 - 100.0 |                     | -             |
|               | 2010-2014           | 38.3           | 31.9 - 44.8 |                  | -            | 30.7             | 21.3 - 40.0 | 61.8              | 53.8 - 69.8 |                | -             |                     | -             |
| Turin         | 2000-2004           | 21.8           | 17.1 - 26.5 |                  | -            | 44.1             | 39.7 - 48.4 | 58.3              | 55.8 - 60.9 |                | -             |                     | -             |
|               | 2005-2009           | 21.7           | 17.0 - 26.3 |                  | -            | 46.0             | 42.0 - 50.0 | 62.7              | 60.4 - 64.9 |                | -             |                     | -             |
|               | 2010-2014           | 25.2           | 19.6 - 30.8 |                  | -            | 44.0             | 38.8 - 49.1 | 63.1              | 60.1 - 66.1 |                | -             |                     | -             |
| Tuscany       | 2000-2004           | 37.2           | 33.5 - 40.8 | 79.5             | 66.1 - 92.8  | 53.8             | 50.9 - 56.6 | 56.5              | 54.3 - 58.8 | 87.6           | 76.3 - 98.8   | 80.0                | 63.0 - 97.1   |
|               | 2005-2009           | 32.1           | 28.2 - 36.1 | 81.1             | 68.5 - 93.8  | 45.0             | 41.6 - 48.4 | 64.7              | 62.5 - 66.8 | 75.5           | 64.7 - 86.3   | 89.0 §              | 77.3 - 100.0  |
|               | 2010-2014           |                | -           |                  | -            |                  | -           |                   | -           |                | -             |                     | -             |
| Umbria        | 2000-2004           | 25.7           | 21.2 - 30.2 | 72.8             | 47.8 - 97.7  | 57.0             | 53.0 - 61.0 | 60.3              | 57.6 - 62.9 | 85.2           | 75.6 - 94.9   | 85.8                | 68.1 - 100.0  |
|               | 2005-2009           | 23.7           | 19.4 - 27.9 | 77.0             | 55.1 - 98.9  | 49.6             | 46.0 - 53.1 | 62.3              | 60.0 - 64.6 | 84.0           | 70.0 - 98.1   | 82.4                | 64.9 - 100.0  |
|               | 2010-2014           | 23.1           | 18.0 - 28.3 | 66.7             | 48.6 - 84.8  | 48.1             | 44.2 - 52.1 | 62.1              | 59.5 - 64.7 | 78.1           | 60.1 - 96.1   |                     | -             |
| Varese        | 2000-2004           | 21.5           | 16.9 - 26.0 | 64.7             | 42.8 - 86.6  | 24.4             | 19.7 - 29.0 | 57.8              | 55.0 - 60.5 | 92.6           | 82.9 - 100.0  | 90.9                | 79.2 - 100.0  |
|               | 2005-2009           | 23.0           | 18.5 - 27.5 | 65.0             | 44.8 - 85.3  | 32.7             | 28.0 - 37.5 | 60.9              | 58.3 - 63.4 | 93.4           | 84.6 - 100.0  | 94.8                | 85.0 - 100.0  |
|               | 2010-2014           | 27.5           | 21.2 - 33.9 | 82.2             | 64           |                  |             |                   |             |                |               |                     |               |

**Web-table 4.3: Age-standardised five-year net survival (NS, %): adults (15-99 years) and children (0-14 years) diagnosed with brain tumours, adults with myeloid or lymphoid malignancies, and children with acute lymphoblastic leukaemia or lymphoma, by continent, country, registry and calendar period of diagnosis (2000-2004, 2005-2009, 2010-2014)**

|                              | Period of diagnosis | Brain (adults) |             | Brain (children) |             | Myeloid (adults) |             | Lymphoid (adults) |             | ALL (children) |              | Lymphoma (children) |               |
|------------------------------|---------------------|----------------|-------------|------------------|-------------|------------------|-------------|-------------------|-------------|----------------|--------------|---------------------|---------------|
|                              |                     | NS (%)         | 95% CI      | NS (%)           | 95% CI      | NS (%)           | 95% CI      | NS (%)            | 95% CI      | NS (%)         | 95% CI       | NS (%)              | 95% CI        |
| Latvia *                     | 2000-2004           | 22.2           | 18.8 - 25.7 | 79.7             | 67.1 - 92.2 | 22.2             | 18.7 - 25.7 | 59.8              | 54.9 - 64.8 | 80.5           | 70.0 - 91.0  | -                   | -             |
|                              | 2005-2009           | 23.9           | 20.8 - 27.0 | 72.3             | 52.2 - 92.3 | 17.9             | 14.4 - 21.4 | 64.7              | 60.5 - 68.9 | 77.0           | 66.4 - 87.7  | -                   | -             |
|                              | 2010-2014           | 26.1           | 22.7 - 29.5 | 67.1             | 51.2 - 83.1 | 21.4             | 17.9 - 25.0 | 71.6              | 67.8 - 75.4 | 84.1           | 73.2 - 94.9  | -                   | -             |
| Lithuania *                  | 2000-2004           | 19.4           | 17.2 - 21.6 | 47.5             | 36.2 - 58.8 | 25.4             | 22.5 - 28.3 | 43.5              | 41.5 - 45.5 | 74.3           | 65.2 - 83.3  | 86.1                | 77.2 - 95.0   |
|                              | 2005-2009           | 22.0           | 19.7 - 24.3 | 66.6             | 53.4 - 79.8 | 47.5             | 45.1 - 49.9 | 50.8              | 48.9 - 52.7 | 67.7           | 56.5 - 78.8  | 79.6                | 67.1 - 92.1   |
|                              | 2010-2014           | 23.4 §         | 20.4 - 26.4 | 61.8             | 44.7 - 78.9 | 52.8             | 49.7 - 56.0 | 56.7              | 54.0 - 59.3 | 74.7           | 62.8 - 86.5  | 93.7                | 85.9 - 100.0  |
| Malta *                      | 2000-2004           | 22.3           | 15.2 - 29.3 | 60.1             | 31.7 - 88.6 | 32.7             | 24.6 - 40.8 | 43.4              | 37.8 - 49.0 | 87.5           | 71.8 - 100.0 | -                   | -             |
|                              | 2005-2009           | 20.1           | 14.0 - 26.1 | -                | -           | 25.4 §           | 18.0 - 32.8 | 52.4              | 47.3 - 57.6 | 93.8           | 82.3 - 100.0 | -                   | -             |
|                              | 2010-2014           | 28.0           | 19.7 - 36.2 | -                | -           | 46.3 §           | 38.3 - 54.3 | 61.9              | 55.8 - 68.0 | -              | -            | -                   | -             |
| Netherlands *                | 2000-2004           | 21.4           | 20.4 - 22.5 | 62.7             | 58.4 - 67.0 | 39.4             | 38.2 - 40.6 | 54.7              | 53.9 - 55.4 | 84.1           | 80.7 - 87.4  | 86.5                | 81.9 - 91.2   |
|                              | 2005-2009           | 26.3           | 25.2 - 27.3 | 66.0             | 61.9 - 70.1 | 49.9             | 48.8 - 51.0 | 63.7              | 63.0 - 64.4 | 89.8           | 86.9 - 92.6  | 86.5                | 82.3 - 90.8   |
|                              | 2010-2014           | 28.2           | 27.2 - 29.3 | 69.1             | 65.1 - 73.1 | 52.2             | 51.2 - 53.2 | 66.4              | 65.8 - 67.1 | 90.4           | 87.5 - 93.3  | 87.9                | 83.5 - 92.2   |
| Norway *                     | 2000-2004           | 32.4           | 30.5 - 34.3 | 79.7             | 73.8 - 85.5 | 41.5             | 39.2 - 43.8 | 57.5              | 56.1 - 58.8 | 87.7           | 82.4 - 93.1  | 93.3                | 87.2 - 99.4   |
|                              | 2005-2009           | 36.7           | 34.9 - 38.5 | 75.9             | 69.7 - 82.1 | 50.9             | 48.8 - 53.0 | 64.9              | 63.7 - 66.2 | 84.9           | 78.2 - 91.6  | 90.9                | 84.3 - 97.5   |
|                              | 2010-2014           | 36.8           | 34.9 - 38.7 | 74.3             | 67.6 - 81.0 | 52.7             | 50.7 - 54.7 | 68.4              | 67.2 - 69.6 | 83.0           | 76.5 - 89.5  | 95.2                | 90.9 - 99.4   |
| Poland *<br>(16 registries)  | 2000-2004           | 26.6           | 25.6 - 27.7 | 62.6             | 59.2 - 66.0 | 18.9             | 17.9 - 19.9 | 40.3              | 39.6 - 41.0 | 79.6           | 76.3 - 82.9  | 81.7                | 77.8 - 85.6   |
|                              | 2005-2009           | 29.0           | 28.2 - 29.8 | 61.7             | 58.1 - 65.3 | 26.3             | 25.2 - 27.5 | 47.8              | 47.2 - 48.5 | 84.4           | 81.7 - 87.0  | 89.4                | 86.4 - 92.4   |
|                              | 2010-2014           | 28.2           | 27.4 - 28.9 | 62.5             | 58.7 - 66.4 | 27.3             | 26.2 - 28.4 | 52.1              | 51.4 - 52.8 | 86.9           | 84.1 - 89.7  | 92.6                | 89.7 - 95.5   |
| Greater Poland               | 2000-2004           | 23.1 §         | 20.2 - 26.0 | 63.4             | 53.4 - 73.5 | 15.9             | 12.7 - 19.1 | 40.2              | 37.8 - 42.6 | 82.0           | 73.9 - 90.1  | 78.9                | 69.4 - 88.4   |
|                              | 2005-2009           | 29.6           | 27.1 - 32.2 | 56.6             | 46.0 - 67.3 | 28.5             | 24.4 - 32.6 | 48.0              | 45.9 - 50.2 | 83.4           | 74.7 - 92.0  | 95.6                | 90.7 - 100.0  |
|                              | 2010-2014           | 31.1           | 28.5 - 33.7 | 66.7             | 56.0 - 77.3 | 19.6             | 16.4 - 22.7 | 50.2              | 48.0 - 52.4 | 81.1           | 72.6 - 89.6  | 89.0                | 80.1 - 98.0   |
| Holy Cross                   | 2000-2004           | 31.7           | 27.8 - 35.5 | 66.7             | 50.2 - 83.2 | 22.7             | 17.9 - 27.4 | 47.3              | 44.1 - 50.6 | 93.3           | 87.7 - 99.0  | 88.6                | 76.5 - 100.0  |
|                              | 2005-2009           | 31.7           | 27.7 - 35.7 | 70.0             | 50.5 - 89.5 | 29.0             | 24.1 - 33.8 | 50.4              | 47.3 - 53.6 | 93.4           | 84.6 - 100.0 | 83.3                | 63.2 - 100.0  |
|                              | 2010-2014           | 30.4           | 26.3 - 34.6 | 87.5             | 75.2 - 99.8 | 42.6             | 36.7 - 48.6 | 54.0              | 50.8 - 57.1 | 94.8           | 87.8 - 100.0 | 93.4                | 83.1 - 100.0  |
| Kuiavia-Pomerania            | 2000-2004           | 28.1           | 24.4 - 31.8 | 61.3             | 47.6 - 74.9 | 22.8             | 17.0 - 28.6 | 43.6              | 40.2 - 46.9 | 67.8           | 54.9 - 80.7  | 77.8                | 59.2 - 96.4   |
|                              | 2005-2009           | 32.2           | 29.3 - 35.0 | 53.0             | 39.9 - 66.1 | 31.2             | 26.7 - 35.7 | 48.4              | 45.7 - 51.0 | 73.1           | 62.9 - 83.3  | 89.7                | 81.2 - 98.1   |
|                              | 2010-2014           | 31.4           | 28.3 - 34.4 | 53.3             | 38.4 - 68.3 | 33.2             | 28.6 - 37.7 | 53.1              | 50.3 - 55.9 | 75.7           | 62.0 - 89.5  | 92.6                | 82.8 - 100.0  |
| Lesser Poland                | 2000-2004           | 21.2 §         | 18.7 - 23.7 | 63.5             | 54.0 - 73.1 | 14.2             | 11.3 - 17.2 | 35.4              | 33.4 - 37.4 | 82.7           | 74.3 - 91.2  | 83.4                | 75.2 - 91.7   |
|                              | 2005-2009           | 27.4           | 24.9 - 29.9 | 67.1             | 56.5 - 77.8 | 24.3             | 20.2 - 28.3 | 46.2              | 44.0 - 48.4 | 94.8           | 90.5 - 99.2  | 89.4                | 81.4 - 97.5   |
|                              | 2010-2014           | 27.3           | 24.7 - 30.0 | 55.8             | 42.5 - 69.1 | 26.2             | 22.0 - 30.5 | 51.7              | 49.5 - 54.0 | 93.1           | 87.6 - 98.6  | 95.5                | 89.6 - 100.0  |
| Łódź                         | 2000-2004           | 23.7           | 20.5 - 26.9 | 48.0             | 34.3 - 61.7 | 24.1             | 19.7 - 28.4 | 35.5              | 32.7 - 38.3 | 59.4 §         | 47.5 - 71.3  | 92.1 §              | 81.7 - 100.0  |
|                              | 2005-2009           | 34.3           | 31.5 - 37.1 | 58.9             | 45.0 - 72.7 | 25.2             | 21.7 - 28.7 | 43.2              | 40.8 - 45.6 | 89.0           | 81.1 - 96.9  | 100.0               | 80.5 - 100.0  |
|                              | 2010-2014           | 31.3           | 28.5 - 34.1 | 57.6             | 43.4 - 71.7 | 31.4             | 27.9 - 34.9 | 56.0              | 53.2 - 58.8 | -              | -            | -                   | -             |
| Lower Silesia                | 2000-2004           | 27.1           | 24.5 - 29.8 | 74.7             | 62.3 - 87.2 | 26.0             | 22.1 - 29.9 | 43.3              | 40.6 - 45.9 | -              | -            | 75.1                | 51.7 - 98.4   |
|                              | 2005-2009           | 27.5           | 25.1 - 30.0 | 45.7             | 31.9 - 59.6 | 19.3             | 16.0 - 22.6 | 46.8              | 44.5 - 49.0 | -              | -            | 84.9                | 74.0 - 95.8   |
|                              | 2010-2014           | 26.7           | 24.3 - 29.2 | 60.6             | 46.4 - 74.7 | 20.6             | 17.2 - 24.0 | 47.8              | 45.6 - 50.1 | -              | -            | 88.9                | 77.6 - 100.0  |
| Lublin                       | 2000-2004           | 27.2 §         | 23.9 - 30.4 | 60.7             | 48.5 - 72.9 | 13.4             | 10.3 - 16.5 | 37.4              | 35.0 - 39.8 | 72.1           | 62.5 - 81.7  | 77.2                | 67.3 - 87.2   |
|                              | 2005-2009           | 31.7           | 28.7 - 34.8 | 58.1             | 46.9 - 69.4 | 26.1             | 22.4 - 29.8 | 52.1              | 49.6 - 54.5 | 90.4           | 83.1 - 97.7  | 83.4                | 68.8 - 97.9   |
|                              | 2010-2014           | 29.8           | 26.6 - 33.0 | 68.8             | 55.0 - 82.6 | 29.2             | 24.8 - 33.6 | 52.5              | 50.0 - 54.9 | 95.3           | 89.9 - 100.0 | 90.0                | 82.1 - 97.9   |
| Lubush                       | 2000-2004           | 25.9           | 20.7 - 31.1 | 62.0             | 41.9 - 82.2 | 14.1             | 8.6 - 19.5  | 32.6              | 27.8 - 37.4 | 81.8           | 60.2 - 100.0 | -                   | -             |
|                              | 2005-2009           | 27.6           | 23.2 - 32.1 | 58.7             | 41.2 - 76.2 | 28.9             | 21.6 - 36.2 | 48.9              | 44.3 - 53.6 | 85.0           | 69.8 - 100.0 | 90.0                | 72.4 - 100.0  |
|                              | 2010-2014           | 23.6           | 19.3 - 28.0 | 59.7             | 40.1 - 79.2 | 26.1             | 19.0 - 33.1 | 49.4              | 45.1 - 53.8 | 93.4           | 82.9 - 100.0 | -                   | -             |
| Mazovia                      | 2000-2004           | 25.2           | 23.0 - 27.4 | 57.1             | 47.0 - 67.1 | 20.1             | 17.2 - 23.0 | 44.5              | 42.7 - 46.3 | 78.3           | 69.6 - 87.0  | 82.3                | 75.8 - 88.8   |
|                              | 2005-2009           | 24.4           | 22.4 - 26.5 | 52.9             | 42.4 - 63.5 | 23.7             | 19.7 - 27.6 | 50.3              | 48.4 - 52.3 | 83.6           | 76.7 - 90.5  | 83.3                | 74.6 - 92.0   |
|                              | 2010-2014           | 26.3           | 24.2 - 28.3 | 50.5             | 39.2 - 61.8 | 18.5             | 15.3 - 21.7 | 50.9              | 48.9 - 52.9 | 86.7           | 79.3 - 94.1  | 87.3                | 77.7 - 96.8   |
| Opole                        | 2000-2004           | 21.7           | 17.0 - 26.4 | 73.7             | 54.5 - 92.9 | 13.6             | 8.4 - 18.7  | 45.1              | 40.3 - 49.8 | 64.8           | 42.9 - 86.7  | -                   | -             |
|                              | 2005-2009           | 23.3           | 17.8 - 28.7 | 70.0             | 43.3 - 96.8 | 38.9             | 30.2 - 47.6 | 53.0              | 48.6 - 57.4 | 89.0           | 77.3 - 100.0 | -                   | -             |
|                              | 2010-2014           | 23.5           | 18.9 - 28.1 | 84.5             | 70.4 - 98.6 | 39.3             | 31.3 - 47.3 | 54.9              | 50.7 - 59.0 | 88.1           | 76.0 - 100.0 | 100.0               | 100.0 - 100.0 |
| Podlaha                      | 2000-2004           | 17.2 §         | 13.6 - 20.7 | 60.4             | 46.9 - 73.9 | 9.2              | 5.5 - 13.0  | 31.9              | 28.4 - 35.4 | 75.8           | 61.4 - 90.2  | 83.3                | 66.6 - 100.0  |
|                              | 2005-2009           | 30.5           | 25.9 - 35.1 | 71.5             | 48.8 - 94.2 | 24.2             | 18.5 - 29.9 | 46.2              | 42.5 - 49.8 | 74.8           | 63.6 - 86.0  | 81.8                | 60.1 - 100.0  |
|                              | 2010-2014           | 30.1           | 25.5 - 34.7 | 65.1             | 46.6 - 83.6 | 17.3             | 11.6 - 22.9 | 52.8              | 48.8 - 56.8 | 72.7           | 56.3 - 89.1  | -                   | -             |
| Pomerania                    | 2000-2004           | 22.5 §         | 19.2 - 25.9 | 60.1             | 47.5 - 72.7 | 15.6             | 12.3 - 18.9 | 34.2              | 31.4 - 37.0 | 68.2           | 50.4 - 86.0  | 66.7                | 44.9 - 88.4   |
|                              | 2005-2009           | 25.3 §         | 22.0 - 28.5 | 67.1             | 51.1 - 83.1 | 22.4             | 18.6 - 26.1 | 44.4              | 41.8 - 46.9 | 82.4           | 72.6 - 92.2  | 79.0                | 61.4 - 96.5   |
|                              | 2010-2014           | 23.1 §         | 20.0 - 26.2 | 71.7             | 56.5 - 86.9 | 25.3             | 21.2 - 29.4 | 54.7              | 52.0 - 57.4 | 87.0           | 78.2 - 95.9  | 97.4                | 93.2 - 100.0  |
| Silesia                      | 2000-2004           | 26.4           | 24.2 - 28.6 | 63.3             | 53.9 - 72.7 | 18.9             | 16.3 - 21.6 | 40.9              | 38.9 - 42.9 | 81.0           | 71.6 - 90.5  | 85.0                | 77.6 - 92.4   |
|                              | 2005-2009           | 26.6           | 24.4 - 28.8 | 73.9             | 64.3 - 83.5 | 22.1             | 19.3 - 25.0 | 46.9              | 45.0 - 48.9 | 82.1           | 74.0 - 90.1  | 91.7                | 82.8 - 100.0  |
|                              | 2010-2014           | 24.3           | 22.1 - 26.5 | 64.7             | 53.0 - 76.4 | 21.9             | 19.4 - 24.4 | 51.8              | 49.9 - 53.8 | 87.1           | 77.0 - 97.1  | 93.7                | 87.4 - 99.9   |
| Subcarpathia                 | 2000-2004           | 28.4           | 25.1 - 31.6 | 60.4             | 46.3 - 74.6 | 21.2             | 17.1 - 25.4 | 41.8              | 39.1 - 44.6 | 84.4           | 74.1 - 94.7  | 82.5                | 72.5 - 92.5   |
|                              | 2005-2009           | 31.0           | 27.7 - 34.2 | 69.7             | 57.8 - 81.7 | 26.3             | 22.2 - 30.5 | 46.9              | 44.4 - 49.4 | 88.7           | 79.9 - 97.4  | 91.7                | 80.9 - 100.0  |
|                              | 2010-2014           | 32.1           | 28.8 - 35.5 | 65.1             | 52.8 - 77.5 | 32.6             | 28.4 - 36.8 | 53.9              | 51.3 - 56.4 | 85.2           | 74.6 - 95.8  | 100.0               | 100.0 - 100.0 |
| Warmia-Mazuria               | 2000-2004           | 28.5           | 23.4 - 33.5 | 71.4             | 55.2 - 87.5 | 21.7             | 13.9 - 29.4 | 43.1              | 38.9 - 47.4 | 92.2           | 85.0 - 99.4  | 81.9                | 66.2 - 97.6   |
|                              | 2005-2009           | 28.4           | 24.6 - 32.3 | 57.2             | 39.3 - 75.1 | 35.4             | 27.2 - 43.5 | 50.1              | 46.4 - 53.7 | 82.0           | 73.3 - 90.6  | 88.0                | 75.5 - 100.0  |
|                              | 2010-2014           | 26.3           | 22.5 - 30.0 | 70.4             | 54.9 - 85.9 | 36.3             | 29.4 - 43.2 | 55.0              | 51.2 - 58.7 | 93.7           | 85.4 - 100.0 | 88.9                | 74.4 - 100.0  |
| West Pomerania               | 2000-2004           | 25.2 §         | 21.2 - 29.3 | 64.9             | 50.5 - 79.3 | 15.2             | 10.8 - 19.6 | 37.9              | 34.6 - 41.1 | 89.7           | 78.8 - 100.0 | 93.8                | 82.3 - 100.0  |
|                              | 2005-2009           | 28.2           | 24.3 - 32.1 | 78.1             | 68.6 - 87.6 | 37.4             | 30.1 - 44.6 | 45.7              | 42.2 - 49.1 | 92.6           | 84.5 - 100.0 | 95.7                | 87.5 - 100.0  |
|                              | 2010-2014           | 24.4           | 20.5 - 28.3 | 60.0             | 42.2 - 77.7 | 22.8             | 17.6 - 28.0 | 44.0              | 40.7 - 47.3 | 89.5           | 80.9 - 98.2  | 100.0               | 100.0 - 100.0 |
| Portugal *<br>(4 registries) | 2000-2004           | 22.9           | 21.3 - 24.6 | 62.0             | 55.0 - 69.1 | 43.7             | 41.6 - 45.8 | 51.3              | 50.1 - 52.6 | 80.8           | 75.3 - 86.4  | 86.2                | 81.0 - 91.4   |
|                              | 2005-2009           | 23.8           | 22.4 - 25.3 | 63.1             | 56.5 - 69.7 | 49.0             | 47.1 - 50.9 | 58.2              | 57.1 - 59.2 | 84.1           | 78.8 - 89.5  | 94.0                | 90.1 - 97.9   |
|                              | 2010-2014           | 22.7           | 19.7 - 25.8 | 70.5             | 57.0 - 84.1 | 49.8             | 45.4 - 54.2 | 59.7              | 57.3 - 62.1 | 89.8           | 80.7 - 98.9  | 94.7                | 88.           |

**Web-table 4.3: Age-standardised five-year net survival (NS, %): adults (15-99 years) and children (0-14 years) diagnosed with brain tumours, adults with myeloid or lymphoid malignancies, and children with acute lymphoblastic leukaemia or lymphoma, by continent, country, registry and calendar period of diagnosis (2000-2004, 2005-2009, 2010-2014)**

|                                   | Period of diagnosis | Brain (adults) |             | Brain (children) |              | Myeloid (adults) |             | Lymphoid (adults) |             | ALL (children) |               | Lymphoma (children) |               |
|-----------------------------------|---------------------|----------------|-------------|------------------|--------------|------------------|-------------|-------------------|-------------|----------------|---------------|---------------------|---------------|
|                                   |                     | NS (%)         | 95% CI      | NS (%)           | 95% CI       | NS (%)           | 95% CI      | NS (%)            | 95% CI      | NS (%)         | 95% CI        | NS (%)              | 95% CI        |
| Romania (Cluj)                    | 2000-2004           |                | -           |                  | -            |                  | -           |                   | -           |                | -             |                     | -             |
|                                   | 2005-2009           | 20.4 §         | 14.0 - 26.7 |                  | -            | 44.9             | 37.2 - 52.5 | 47.3              | 42.0 - 52.5 |                | -             |                     | -             |
|                                   | 2010-2014           | 34.0 §         | 23.8 - 44.1 | 60.1             | 31.6 - 88.5  | 51.5             | 42.7 - 60.3 | 40.4              | 33.3 - 47.5 | 53.9           | 28.2 - 79.6   |                     | -             |
| Russian Federation (5 registries) | 2000-2004           | 25.2           | 21.3 - 29.0 | 61.2             | 50.4 - 72.0  | 33.1             | 28.7 - 37.5 | 40.5              | 37.4 - 43.5 | 71.3           | 62.6 - 80.0   | 67.0                | 54.9 - 79.1   |
|                                   | 2005-2009           | 21.2           | 19.2 - 23.2 | 61.2             | 50.3 - 72.0  | 35.3             | 31.7 - 39.0 | 42.4              | 39.8 - 45.0 | 74.2           | 65.3 - 83.0   | 73.5                | 62.6 - 84.4   |
|                                   | 2010-2014           | 22.8           | 20.8 - 24.9 | 61.7             | 51.5 - 71.8  | 33.2             | 29.8 - 36.7 | 45.5              | 42.9 - 48.2 | 76.9           | 68.4 - 85.4   | 92.1                | 84.6 - 99.6   |
| Arkhangelsk                       | 2000-2004           | 16.7           | 11.4 - 22.0 | 74.5             | 59.3 - 89.6  | 14.9             | 8.7 - 21.1  | 34.0              | 29.2 - 38.8 | 52.2           | 32.4 - 72.1   | 45.5                | 25.5 - 65.6   |
|                                   | 2005-2009           | 21.1           | 16.7 - 25.4 | 61.7             | 36.5 - 86.9  | 26.6             | 19.5 - 33.7 | 42.2              | 36.8 - 47.6 | 82.7           | 67.5 - 97.8   | 75.0                | 51.7 - 98.4   |
|                                   | 2010-2014           | 27.5           | 22.5 - 32.6 | 78.2             | 64.1 - 92.2  | 22.1             | 16.3 - 28.0 | 45.4              | 40.4 - 50.5 | 91.0           | 80.8 - 100.0  | 91.8                | 75.8 - 100.0  |
| Karelia                           | 2000-2004           | 18.6           | 13.3 - 23.9 | 66.8             | 43.8 - 89.7  | 38.6             | 28.6 - 48.6 | 42.2              | 30.5 - 53.9 |                | -             |                     | -             |
|                                   | 2005-2009           | 18.5           | 12.8 - 24.2 |                  | -            | 36.3             | 28.8 - 43.8 | 51.5              | 42.2 - 60.8 |                | -             |                     | -             |
|                                   | 2010-2014           | 14.2           | 9.4 - 19.0  | 60.7 §           | 32.4 - 89.0  | 24.9             | 18.4 - 31.4 | 44.5 §            | 37.4 - 51.6 |                | -             |                     | -             |
| Omsk                              | 2000-2004           | 42.5           | 29.9 - 55.1 | 72.9 §           | 47.9 - 97.9  |                  | -           |                   | -           |                | -             |                     | -             |
|                                   | 2005-2009           | 25.5           | 20.3 - 30.6 | 56.3             | 35.4 - 77.3  |                  | -           |                   | -           |                | -             |                     | -             |
|                                   | 2010-2014           | 26.7           | 21.8 - 31.6 | 61.4 §           | 41.7 - 81.1  |                  | -           |                   | -           |                | -             |                     | -             |
| Samara                            | 2000-2004           | 26.9           | 22.1 - 31.7 | 50.2             | 36.4 - 64.0  | 37.2             | 31.5 - 43.0 | 42.3              | 38.4 - 46.2 | 75.3           | 65.9 - 84.8   | 79.4                | 67.4 - 91.5   |
|                                   | 2005-2009           | 20.2           | 17.3 - 23.1 | 62.9             | 52.0 - 73.9  | 37.2             | 32.5 - 41.9 | 41.1              | 38.0 - 44.2 | 74.5           | 64.6 - 84.4   | 73.6                | 62.8 - 84.4   |
|                                   | 2010-2014           | 22.3           | 19.3 - 25.3 | 53.0             | 40.7 - 65.3  | 38.2             | 33.5 - 42.9 | 45.0              | 41.8 - 48.2 | 70.8           | 60.1 - 81.5   | 91.3                | 82.4 - 100.0  |
| Tomsk                             | 2000-2004           |                | -           |                  | -            |                  | -           |                   | -           |                | -             |                     | -             |
|                                   | 2005-2009           | 18.6           | 13.8 - 23.4 |                  | -            |                  | -           |                   | -           |                | -             |                     | -             |
|                                   | 2010-2014           | 20.8           | 15.3 - 26.2 | 40.0 §           | 0.0 - 82.3   |                  | -           |                   | -           |                | -             |                     | -             |
| Slovakia *                        | 2000-2004           | 22.0 §         | 20.0 - 24.0 | 67.9             | 60.5 - 75.4  | 35.1 §           | 32.2 - 38.1 | 46.6              | 44.6 - 48.6 | 79.2           | 71.8 - 86.5   | 83.8                | 75.1 - 92.5   |
|                                   | 2005-2009           | 27.2           | 25.3 - 29.0 | 70.0             | 62.5 - 77.5  | 37.1             | 34.8 - 39.4 | 49.6              | 48.0 - 51.2 | 80.7           | 73.8 - 87.7   | 94.6                | 90.1 - 99.1   |
|                                   | 2010-2014           | 28.5           | 24.3 - 32.8 | 80.6             | 69.4 - 91.7  | 37.5             | 32.2 - 42.8 | 51.6              | 48.0 - 55.2 | 87.0           | 77.3 - 96.7   | 88.6                | 75.4 - 100.0  |
| Slovenia *                        | 2000-2004           | 23.0           | 19.9 - 26.1 | 76.5             | 66.8 - 86.3  | 42.4             | 38.5 - 46.2 | 52.7              | 50.2 - 55.2 | 89.7           | 82.1 - 97.3   | 80.1                | 68.7 - 91.5   |
|                                   | 2005-2009           | 24.1           | 21.2 - 27.0 | 61.2             | 49.2 - 73.1  | 39.8             | 36.6 - 42.9 | 56.7              | 54.6 - 58.9 | 79.1           | 67.1 - 91.1   | 100.0               | 86.3 - 100.0  |
|                                   | 2010-2014           | 24.8           | 21.4 - 28.3 | 60.1             | 44.2 - 76.1  | 37.5             | 34.2 - 40.7 | 59.0              | 56.6 - 61.3 | 70.1           | 54.4 - 85.8   | 100.0               | 100.0 - 100.0 |
| Spain (10 registries)             | 2000-2004           | 21.6           | 20.2 - 23.0 | 63.6             | 57.7 - 69.4  | 45.4             | 43.6 - 47.2 | 58.2              | 57.1 - 59.3 | 80.9           | 76.3 - 85.5   | 85.8                | 80.2 - 91.4   |
|                                   | 2005-2009           | 27.2           | 25.8 - 28.7 | 63.4             | 58.2 - 68.6  | 52.3             | 50.8 - 53.8 | 62.2              | 61.3 - 63.2 | 80.0           | 75.4 - 84.5   | 89.9                | 85.9 - 94.0   |
|                                   | 2010-2014           | 27.4           | 25.2 - 29.7 | 66.2             | 58.0 - 74.4  | 50.0             | 47.7 - 52.3 | 62.0              | 60.5 - 63.6 | 84.7           | 77.6 - 91.7   | 92.9                | 87.5 - 98.3   |
| Basque Country                    | 2000-2004           | 19.2           | 16.6 - 21.8 | 66.7             | 49.3 - 84.1  | 42.4             | 39.0 - 45.9 | 60.1              | 58.1 - 62.2 | 96.7           | 93.2 - 100.0  | 83.9                | 71.2 - 96.7   |
|                                   | 2005-2009           | 25.2           | 22.4 - 28.0 | 57.6             | 46.4 - 68.8  | 55.1             | 52.4 - 57.7 | 66.6              | 64.8 - 68.4 | 90.4           | 82.7 - 98.1   | 95.7                | 87.5 - 100.0  |
|                                   | 2010-2014           | 25.0           | 21.8 - 28.3 | 61.8             | 46.4 - 77.2  | 55.7             | 52.7 - 58.6 | 67.8              | 65.9 - 69.8 | 84.8           | 74.0 - 95.5   | 100.0               | 100.0 - 100.0 |
| Canaries                          | 2000-2004           | 22.5           | 19.1 - 25.9 | 62.1             | 44.8 - 79.4  | 33.6             | 28.7 - 38.5 | 54.7              | 52.1 - 57.3 | 74.8           | 64.6 - 85.0   | 89.8                | 79.4 - 100.0  |
|                                   | 2005-2009           | 29.7           | 26.4 - 33.1 | 59.3             | 46.0 - 72.5  | 43.2             | 39.3 - 47.1 | 60.4              | 58.0 - 62.8 | 69.6           | 58.5 - 80.7   | 80.0                | 68.2 - 91.8   |
|                                   | 2010-2014           | 31.7           | 26.4 - 36.9 |                  | -            | 39.5             | 34.1 - 45.0 | 60.4              | 56.7 - 64.1 | 100.0          | 100.0 - 100.0 |                     | -             |
| Girona                            | 2000-2004           | 21.8           | 16.7 - 26.8 | 68.5             | 48.2 - 88.7  | 52.3             | 46.9 - 57.8 | 54.3              | 50.5 - 58.0 | 78.6           | 58.0 - 99.3   | 86.2 §              | 69.0 - 100.0  |
|                                   | 2005-2009           | 29.4           | 24.1 - 34.7 | 66.7             | 47.1 - 86.3  | 59.3             | 55.0 - 63.6 | 62.2              | 59.0 - 65.4 | 100.0          | 100.0 - 100.0 |                     | -             |
|                                   | 2010-2014           | 26.5           | 20.4 - 32.7 | 52.1             | 37.1 - 67.1  | 57.8             | 52.9 - 62.8 | 61.8              | 58.2 - 65.4 | 96.7           | 90.8 - 100.0  | 100.0               | 100.0 - 100.0 |
| Granada                           | 2000-2004           | 24.4           | 20.1 - 28.6 | 42.2             | 20.9 - 63.4  | 36.0             | 30.6 - 41.5 | 50.8              | 46.9 - 54.8 | 64.7           | 42.8 - 86.7   |                     | -             |
|                                   | 2005-2009           | 32.3           | 28.0 - 36.7 | 76.2             | 58.5 - 94.0  | 41.7             | 36.3 - 47.0 | 51.5              | 48.0 - 55.0 | 72.9           | 59.8 - 85.9   | 81.0                | 64.6 - 97.3   |
|                                   | 2010-2014           | 29.7           | 25.0 - 34.5 | 71.4             | 52.3 - 90.5  | 35.8             | 29.5 - 42.0 | 50.3              | 45.9 - 54.8 | 92.2           | 83.3 - 100.0  | 100.0               | 100.0 - 100.0 |
| Mallorca                          | 2000-2004           | 22.6           | 18.0 - 27.2 | 60.1             | 31.6 - 88.5  | 52.6             | 47.1 - 58.1 | 61.0              | 57.1 - 65.0 | 81.3           | 62.8 - 99.7   | 90.9                | 74.7 - 100.0  |
|                                   | 2005-2009           | 22.4           | 16.9 - 28.0 | 59.1             | 39.2 - 79.1  | 60.3             | 55.4 - 65.1 | 58.6              | 55.1 - 62.2 | 70.6           | 52.7 - 88.5   | 92.9                | 79.9 - 100.0  |
|                                   | 2010-2014           | 22.7           | 16.3 - 29.2 | 71.3             | 54.7 - 87.8  | 63.7             | 57.4 - 70.1 | 63.3              | 58.8 - 67.9 | 86.9           | 72.3 - 100.0  |                     | -             |
| Murcia                            | 2000-2004           | 21.8           | 18.0 - 25.7 | 59.8             | 42.4 - 77.2  | 48.2             | 43.6 - 52.7 | 60.3              | 57.2 - 63.5 | 80.3           | 68.6 - 92.0   | 83.1                | 71.6 - 94.5   |
|                                   | 2005-2009           | 28.4           | 24.3 - 32.5 | 62.6             | 43.8 - 81.3  | 54.0             | 50.1 - 58.0 | 62.7              | 60.0 - 65.5 | 85.6           | 77.6 - 93.6   | 86.7                | 70.1 - 100.0  |
|                                   | 2010-2014           | 31.8           | 24.5 - 39.1 | 67.3             | 50.2 - 84.4  | 39.0             | 30.9 - 47.1 | 64.3              | 58.0 - 70.5 |                | -             |                     | -             |
| Navarra                           | 2000-2004           | 18.4           | 13.1 - 23.8 | 46.2             | 20.7 - 71.7  | 45.4             | 38.6 - 52.2 | 65.6              | 61.6 - 69.6 | 87.5           | 71.8 - 100.0  |                     | -             |
|                                   | 2005-2009           | 24.2           | 19.3 - 29.0 | 56.3             | 33.0 - 79.6  | 45.6             | 39.5 - 51.6 | 64.4              | 60.6 - 68.1 | 94.5           | 84.2 - 100.0  | 84.7                | 65.9 - 100.0  |
|                                   | 2010-2014           | 32.0           | 22.2 - 41.9 |                  | -            | 45.0             | 34.7 - 55.2 | 57.1              | 49.9 - 64.3 |                | -             |                     | -             |
| Tarragona                         | 2000-2004           | 24.3           | 18.9 - 29.8 | 100.0            | 73.5 - 100.0 | 51.6             | 46.2 - 56.9 | 56.9              | 53.2 - 60.5 | 81.3           | 62.8 - 99.8   |                     | -             |
|                                   | 2005-2009           | 24.8           | 19.9 - 29.7 | 52.7             | 31.0 - 74.3  | 49.6             | 44.3 - 54.8 | 61.7              | 58.1 - 65.3 | 88.9           | 74.8 - 100.0  | 90.5                | 78.3 - 100.0  |
|                                   | 2010-2014           | 32.5           | 25.1 - 39.9 |                  | -            | 48.2             | 40.8 - 55.7 | 60.3              | 55.0 - 65.6 |                | -             |                     | -             |
| Spain Childhood                   | 2000-2004           |                | -           | 66.3 §           | 59.7 - 72.8  |                  | -           |                   | -           | 82.1 §         | 77.3 - 86.9   | 91.8 §              | 87.3 - 96.3   |
|                                   | 2005-2009           |                | -           | 66.0 §           | 60.5 - 71.6  |                  | -           |                   | -           | 81.5 §         | 76.4 - 86.6   | 90.3 §              | 86.1 - 94.6   |
|                                   | 2010-2014           |                | -           | 69.3 §           | 63.4 - 75.2  |                  | -           |                   | -           | 80.5 §         | 75.3 - 85.7   | 92.5 §              | 88.5 - 96.5   |
| Valencia Childhood                | 2000-2004           |                | -           | 60.1             | 50.1 - 70.1  |                  | -           |                   | -           | 80.4           | 72.8 - 88.1   | 88.6                | 80.9 - 96.2   |
|                                   | 2005-2009           |                | -           | 66.2             | 57.5 - 74.8  |                  | -           |                   | -           | 72.6           | 63.6 - 81.6   | 94.2                | 89.2 - 99.2   |
|                                   | 2010-2014           |                | -           | 71.9             | 61.8 - 82.0  |                  | -           |                   | -           | 80.9           | 69.4 - 92.3   | 91.1                | 83.1 - 99.2   |
| Sweden *                          | 2000-2004           | 26.5           | 25.1 - 28.0 | 75.9             | 70.5 - 81.3  | 30.7             | 28.9 - 32.6 | 58.5              | 57.6 - 59.5 | 86.8           | 82.6 - 90.9   | 84.7                | 75.8 - 93.6   |
|                                   | 2005-2009           | 29.0           | 27.5 - 30.4 | 78.4             | 73.2 - 83.6  | 54.6             | 53.1 - 56.1 | 64.2              | 63.3 - 65.1 | 87.1           | 82.6 - 91.5   | 88.6                | 81.5 - 95.8   |
|                                   | 2010-2014           | 31.6           | 30.1 - 33.0 | 79.8             | 74.9 - 84.7  | 57.5             | 56.0 - 58.9 | 66.7              | 65.9 - 67.6 | 89.0           | 84.6 - 93.3   | 88.0                | 80.4 - 95.7   |
| Switzerland (10 registries)       | 2000-2004           | 26.4           | 23.9 - 28.8 | 73.7             | 67.7 - 79.8  | 46.5             | 43.9 - 49.1 | 61.6              | 60.1 - 63.2 | 87.3           | 82.4 - 92.2   | 94.0                | 89.5 - 98.6   |
|                                   | 2005-2009           | 29.0           | 26.7 - 31.2 | 68.0             | 61.2 - 74.8  | 51.6             | 49.3 - 53.9 | 70.9              | 69.5 - 72.3 | 89.2           | 84.9 - 93.4   | 94.2                | 89.5 - 98.9   |
|                                   | 2010-2014           | 29.7           | 27.5 - 31.9 | 71.6             | 65.1 - 78.0  | 49.7             | 47.2 - 52.2 | 72.0              | 70.4 - 73.5 | 90.3           | 86.1 - 94.5   | 93.6                | 88.1 - 99.1</ |

**Web-table 4.3: Age-standardised five-year net survival (NS, %): adults (15-99 years) and children (0-14 years) diagnosed with brain tumours, adults with myeloid or lymphoid malignancies, and children with acute lymphoblastic leukaemia or lymphoma, by continent, country, registry and calendar period of diagnosis (2000-2004, 2005-2009, 2010-2014)**

|                                    | Period of diagnosis | Brain (adults) |             | Brain (children) |             | Myeloid (adults) |             | Lymphoid (adults) |             | ALL (children) |              | Lymphoma (children) |              |
|------------------------------------|---------------------|----------------|-------------|------------------|-------------|------------------|-------------|-------------------|-------------|----------------|--------------|---------------------|--------------|
|                                    |                     | NS (%)         | 95% CI      | NS (%)           | 95% CI      | NS (%)           | 95% CI      | NS (%)            | 95% CI      | NS (%)         | 95% CI       | NS (%)              | 95% CI       |
| St Gallen-Appenzell                | 2000-2004           | 32.6           | 26.3 - 38.8 | -                | -           | 42.5             | 36.2 - 48.7 | 61.5              | 57.5 - 65.5 | -              | -            | -                   | -            |
|                                    | 2005-2009           | 29.5           | 23.8 - 35.2 | -                | -           | 48.8             | 42.8 - 54.7 | 68.9              | 65.3 - 72.5 | -              | -            | -                   | -            |
|                                    | 2010-2014           | 34.0           | 27.8 - 40.2 | -                | -           | 47.5             | 41.8 - 53.1 | 67.8              | 64.3 - 71.3 | -              | -            | -                   | -            |
| Ticino                             | 2000-2004           | 22.7           | 15.8 - 29.7 | -                | -           | 47.9             | 40.9 - 55.0 | 60.4              | 56.1 - 64.7 | -              | -            | -                   | -            |
|                                    | 2005-2009           | 25.2           | 18.4 - 32.0 | -                | -           | 51.0             | 44.5 - 57.4 | 72.6              | 68.7 - 76.5 | -              | -            | -                   | -            |
|                                    | 2010-2014           | 30.7           | 24.1 - 37.3 | -                | -           | 53.5             | 47.4 - 59.6 | 74.8              | 71.0 - 78.6 | -              | -            | -                   | -            |
| Valais                             | 2000-2004           | 28.1           | 20.1 - 36.0 | -                | -           | 52.4             | 43.5 - 61.3 | 66.4              | 61.3 - 71.6 | -              | -            | -                   | -            |
|                                    | 2005-2009           | 35.8           | 29.1 - 42.5 | -                | -           | 57.4             | 49.7 - 65.1 | 73.2              | 68.6 - 77.8 | -              | -            | -                   | -            |
|                                    | 2010-2014           | 33.8           | 26.9 - 40.8 | -                | -           | 63.0             | 55.7 - 70.2 | 78.3              | 73.9 - 82.8 | -              | -            | -                   | -            |
| Zürich and Zug                     | 2000-2004           | 25.3           | 21.6 - 29.1 | -                | -           | 47.5             | 43.4 - 51.6 | 59.3              | 56.8 - 61.8 | -              | -            | -                   | -            |
|                                    | 2005-2009           | 31.0           | 27.3 - 34.6 | -                | -           | 54.2             | 50.7 - 57.8 | 71.0              | 68.8 - 73.2 | -              | -            | -                   | -            |
|                                    | 2010-2014           | 31.9           | 28.0 - 35.8 | -                | -           | 50.0 §           | 46.1 - 53.9 | 69.2 §            | 66.7 - 71.7 | -              | -            | -                   | -            |
| Switzerland (Childhood) †          | 2000-2004           | -              | -           | 73.7             | 67.7 - 79.8 | -                | -           | -                 | -           | 87.3           | 82.4 - 92.2  | 94.0                | 89.5 - 98.6  |
|                                    | 2005-2009           | -              | -           | 68.0             | 61.2 - 74.8 | -                | -           | -                 | -           | 89.2           | 84.9 - 93.4  | 94.2                | 89.5 - 98.9  |
|                                    | 2010-2014           | -              | -           | 71.6             | 65.1 - 78.0 | -                | -           | -                 | -           | 90.3           | 86.1 - 94.5  | 93.6                | 88.1 - 99.1  |
| United Kingdom *<br>(4 registries) | 2000-2004           | 20.6           | 20.1 - 21.2 | 68.4             | 66.2 - 70.7 | 42.3             | 41.7 - 42.9 | 54.3              | 53.9 - 54.6 | 85.9           | 84.1 - 87.7  | 86.8                | 84.1 - 89.5  |
|                                    | 2005-2009           | 23.8           | 23.3 - 24.4 | 69.1             | 66.9 - 71.3 | 47.7             | 47.1 - 48.2 | 60.7              | 60.4 - 61.1 | 91.4           | 89.9 - 92.8  | 90.6                | 88.3 - 93.0  |
|                                    | 2010-2014           | 26.3           | 25.7 - 26.8 | 71.9             | 69.8 - 74.0 | 48.7             | 48.1 - 49.2 | 64.9              | 64.6 - 65.3 | 92.2           | 90.9 - 93.6  | 91.7                | 89.7 - 93.8  |
| England                            | 2000-2004           | 19.8           | 19.2 - 20.4 | 68.0             | 65.5 - 70.5 | 43.3             | 42.7 - 44.0 | 54.0              | 53.6 - 54.4 | 85.9           | 84.0 - 87.9  | 85.8                | 82.7 - 88.9  |
|                                    | 2005-2009           | 23.2           | 22.6 - 23.8 | 69.0             | 66.5 - 71.4 | 47.8             | 47.2 - 48.4 | 60.6              | 60.2 - 61.0 | 92.1           | 90.6 - 93.7  | 90.3                | 87.8 - 92.9  |
|                                    | 2010-2014           | 25.8           | 25.2 - 26.5 | 70.9             | 68.6 - 73.3 | 48.7             | 48.1 - 49.2 | 65.1              | 64.7 - 65.4 | 92.3           | 90.9 - 93.8  | 91.9                | 89.7 - 94.1  |
| Northern Ireland                   | 2000-2004           | 24.3           | 20.9 - 27.6 | 71.9             | 61.3 - 82.5 | 50.2             | 46.9 - 53.5 | 52.4              | 50.1 - 54.8 | 82.3           | 72.5 - 92.0  | 96.6                | 90.0 - 100.0 |
|                                    | 2005-2009           | 27.7           | 24.7 - 30.8 | 63.8             | 52.5 - 75.2 | 51.2             | 48.2 - 54.3 | 62.3              | 60.1 - 64.5 | 90.4           | 81.8 - 99.1  | 96.3                | 89.4 - 100.0 |
|                                    | 2010-2014           | 28.1           | 24.9 - 31.2 | 73.0             | 61.9 - 84.1 | 51.6             | 48.6 - 54.5 | 64.8              | 62.7 - 66.9 | 91.0           | 82.7 - 99.2  | 93.1                | 84.1 - 100.0 |
| Scotland                           | 2000-2004           | 22.8           | 21.0 - 24.7 | 64.1             | 56.0 - 72.2 | 32.1             | 29.6 - 34.6 | 58.2              | 56.9 - 59.5 | 85.3           | 79.3 - 91.3  | 90.7                | 84.3 - 97.0  |
|                                    | 2005-2009           | 25.7           | 23.9 - 27.6 | 69.9             | 62.1 - 77.7 | 51.4             | 49.5 - 53.2 | 63.4              | 62.2 - 64.7 | 88.3           | 82.6 - 94.0  | 89.3                | 82.5 - 96.2  |
|                                    | 2010-2014           | 26.5           | 24.7 - 28.4 | 76.0             | 68.9 - 83.0 | 53.2             | 51.4 - 54.9 | 65.5              | 64.3 - 66.7 | 91.7           | 86.4 - 97.0  | 85.1                | 74.3 - 95.9  |
| Wales                              | 2000-2004           | 26.7           | 24.3 - 29.1 | 79.6             | 71.0 - 88.1 | 20.4             | 17.7 - 23.0 | 51.7              | 50.2 - 53.3 | 87.4           | 79.7 - 95.0  | 92.3                | 86.2 - 98.5  |
|                                    | 2005-2009           | 28.5           | 26.2 - 30.9 | 74.3             | 65.7 - 83.0 | 26.8             | 24.2 - 29.5 | 57.9              | 56.5 - 59.4 | 87.7           | 80.9 - 94.4  | 97.4                | 92.8 - 100.0 |
|                                    | 2010-2014           | 30.9           | 28.5 - 33.3 | 81.9             | 73.8 - 90.0 | 29.3             | 26.5 - 32.1 | 61.4              | 60.0 - 62.9 | 92.3           | 86.2 - 98.3  | 98.4                | 95.5 - 100.0 |
| <b>OCEANIA</b>                     |                     |                |             |                  |             |                  |             |                   |             |                |              |                     |              |
| Australia *<br>(8 registries)      | 2000-2004           | 24.5           | 23.5 - 25.4 | 62.0             | 57.7 - 66.3 | 43.3             | 42.3 - 44.3 | 61.5              | 60.9 - 62.1 | 86.5           | 83.8 - 89.1  | 91.4                | 88.0 - 94.8  |
|                                    | 2005-2009           | 28.9           | 27.9 - 29.8 | 60.6             | 56.4 - 64.9 | 50.3             | 49.4 - 51.1 | 68.1              | 67.6 - 68.7 | 90.3           | 87.9 - 92.6  | 94.2                | 91.4 - 96.9  |
|                                    | 2010-2014           | 30.2           | 29.2 - 31.2 | 67.1             | 62.9 - 71.4 | 51.8             | 50.9 - 52.7 | 71.2              | 70.6 - 71.8 | 90.7           | 88.3 - 93.1  | 92.3                | 89.2 - 95.4  |
| Australian Capital Territory       | 2000-2004           | 29.4           | 22.5 - 36.3 | -                | -           | 47.5             | 39.1 - 55.9 | 57.6              | 52.1 - 63.1 | 69.3           | 45.3 - 93.2  | -                   | -            |
|                                    | 2005-2009           | 23.7           | 16.8 - 30.6 | 25.0             | 2.9 - 47.1  | 51.5             | 43.9 - 59.0 | 70.2              | 65.5 - 75.0 | 100.0          | 79.4 - 100.0 | -                   | -            |
|                                    | 2010-2014           | 36.4           | 27.1 - 45.6 | -                | -           | 47.9             | 40.2 - 55.5 | 71.5              | 66.3 - 76.6 | 90.1           | 72.4 - 100.0 | -                   | -            |
| New South Wales                    | 2000-2004           | 22.7           | 21.0 - 24.4 | 61.5             | 53.1 - 69.8 | 38.6             | 36.8 - 40.3 | 58.6              | 57.6 - 59.7 | 86.9           | 82.3 - 91.5  | 93.6                | 88.8 - 98.5  |
|                                    | 2005-2009           | 27.3           | 25.4 - 29.2 | 53.4             | 43.9 - 62.9 | 48.2             | 46.5 - 49.9 | 67.1              | 66.0 - 68.1 | 83.7           | 78.7 - 88.7  | 91.8                | 85.3 - 98.3  |
|                                    | 2010-2014           | 29.8           | 27.5 - 32.2 | 50.9             | 40.2 - 61.7 | 53.1             | 51.0 - 55.1 | 69.9              | 68.6 - 71.2 | 84.6           | 78.4 - 90.8  | 94.3                | 87.2 - 100.0 |
| Northern Territory                 | 2000-2004           | 26.8           | 12.9 - 40.7 | -                | -           | 57.4             | 40.3 - 74.5 | 50.1              | 41.1 - 59.0 | -              | -            | -                   | -            |
|                                    | 2005-2009           | 17.6           | 5.3 - 29.9  | -                | -           | 40.4             | 24.6 - 56.2 | 53.3              | 44.4 - 62.1 | -              | -            | -                   | -            |
|                                    | 2010-2014           | 13.0           | 1.7 - 24.3  | -                | -           | 40.5             | 26.6 - 54.3 | 58.0              | 47.8 - 68.2 | -              | -            | -                   | -            |
| Queensland                         | 2000-2004           | 30.9           | 28.9 - 32.9 | 67.0             | 59.5 - 74.5 | 53.2             | 51.2 - 55.2 | 65.3              | 63.9 - 66.7 | 83.6           | 77.2 - 90.1  | 89.5                | 84.4 - 94.6  |
|                                    | 2005-2009           | 34.5           | 32.6 - 36.5 | 70.8             | 64.6 - 77.0 | 52.2             | 50.3 - 54.0 | 71.4              | 70.1 - 72.6 | 92.1           | 87.7 - 96.6  | 93.0                | 85.9 - 100.0 |
|                                    | 2010-2014           | 35.1           | 33.2 - 37.0 | 79.5             | 73.7 - 85.3 | 51.8             | 50.1 - 53.6 | 73.2              | 72.0 - 74.4 | 92.8           | 88.6 - 97.0  | 88.8                | 80.4 - 97.1  |
| South Australia                    | 2000-2004           | 19.0           | 15.6 - 22.4 | 55.6             | 33.5 - 77.7 | 38.0             | 34.3 - 41.7 | 63.5              | 61.5 - 65.4 | 90.9           | 85.8 - 96.1  | 96.0                | 88.5 - 100.0 |
|                                    | 2005-2009           | 22.7           | 19.3 - 26.1 | 70.0             | 55.9 - 84.2 | 47.9             | 44.9 - 50.9 | 70.3              | 68.4 - 72.1 | 97.6           | 93.3 - 100.0 | 100.0               | 85.2 - 100.0 |
|                                    | 2010-2014           | 23.1           | 18.9 - 27.2 | 77.6             | 63.0 - 92.3 | 49.3             | 45.9 - 52.8 | 72.2              | 70.1 - 74.2 | 95.6           | 89.4 - 100.0 | 83.3                | 67.0 - 99.7  |
| Tasmania                           | 2000-2004           | 22.8           | 17.4 - 28.2 | 70.1             | 50.6 - 89.6 | 34.8             | 28.4 - 41.1 | 60.9              | 57.0 - 64.9 | 88.3           | 73.4 - 100.0 | -                   | -            |
|                                    | 2005-2009           | 22.7           | 17.1 - 28.4 | 50.0             | 27.9 - 72.2 | 40.6             | 34.5 - 46.6 | 71.1              | 67.3 - 74.8 | 94.8           | 85.0 - 100.0 | -                   | -            |
|                                    | 2010-2014           | 20.9           | 14.9 - 26.8 | -                | -           | 44.5             | 37.7 - 51.3 | 71.9              | 67.8 - 76.0 | 77.8           | 65.9 - 89.7  | -                   | -            |
| Victoria                           | 2000-2004           | 22.6           | 20.7 - 24.5 | 64.8             | 56.5 - 73.1 | 41.2             | 39.3 - 43.2 | 61.7              | 60.5 - 62.9 | 87.4           | 82.6 - 92.2  | 91.7                | 85.5 - 97.8  |
|                                    | 2005-2009           | 29.4           | 27.5 - 31.3 | 57.4             | 47.8 - 66.9 | 54.1             | 52.5 - 55.6 | 66.6              | 65.4 - 67.7 | 94.1           | 90.6 - 97.6  | 94.8                | 89.7 - 99.9  |
|                                    | 2010-2014           | 30.4           | 28.5 - 32.3 | 70.5             | 62.7 - 78.4 | 55.4             | 53.8 - 57.0 | 70.7              | 69.6 - 71.7 | 95.0           | 92.1 - 97.8  | 94.9                | 90.6 - 99.1  |
| Western Australia                  | 2000-2004           | 20.3           | 17.1 - 23.5 | 51.9             | 37.7 - 66.1 | 42.4             | 39.2 - 45.6 | 61.6              | 59.5 - 63.6 | 91.7           | 86.4 - 96.9  | 91.4                | 82.3 - 100.0 |
|                                    | 2005-2009           | 24.6           | 21.7 - 27.4 | 45.2             | 30.4 - 60.0 | 43.6             | 40.6 - 46.6 | 66.1              | 64.2 - 67.9 | 91.5           | 84.2 - 98.9  | 93.6                | 87.0 - 100.0 |
|                                    | 2010-2014           | 25.5           | 22.5 - 28.6 | 40.6             | 27.5 - 53.7 | 43.6             | 40.9 - 46.4 | 68.6              | 66.8 - 70.3 | 88.0           | 79.5 - 96.5  | 92.7                | 85.9 - 99.5  |
| New Zealand *                      | 2000-2004           | 19.0           | 16.8 - 21.2 | 60.2             | 50.6 - 69.8 | 40.3             | 37.8 - 42.9 | 61.0              | 59.6 - 62.5 | 85.8           | 79.9 - 91.6  | 93.6                | 88.7 - 98.4  |
|                                    | 2005-2009           | 22.7           | 20.4 - 25.0 | 54.4             | 42.9 - 66.0 | 49.7             | 47.7 - 51.8 | 63.5              | 62.1 - 64.9 | 91.2           | 86.8 - 95.6  | 93.5                | 88.0 - 99.0  |
|                                    | 2010-2014           | 23.3           | 21.0 - 25.7 | 58.2             | 46.1 - 70.4 | 44.1             | 42.1 - 46.2 | 65.6              | 64.3 - 66.9 | 91.4           | 86.7 - 96.1  | 96.6                | 92.7 - 100.0 |

**Adults**

|                 |                                                      |
|-----------------|------------------------------------------------------|
| Web-figure 1.1  | Africa                                               |
| Web-figure 1.2  | Africa (Northern)                                    |
| Web-figure 1.3  | Africa (Western)                                     |
| Web-figure 1.4  | Africa (Southern)                                    |
| Web-figure 1.5  | Americas (Latin America and the Caribbean)           |
| Web-figure 1.6  | Americas (Latin America and the Caribbean): Northern |
| Web-figure 1.7  | Americas (Latin America and the Caribbean): Southern |
| Web-figure 1.8  | Americas (Latin America and the Caribbean): Brazil   |
| Web-figure 1.9  | Americas (Northern): Canada                          |
| Web-figure 1.10 | Americas (Northern): USA                             |
| Web-figure 1.11 | Asia (Western)                                       |
| Web-figure 1.12 | Asia (Western): Turkey                               |
| Web-figure 1.13 | Asia (Southern): Northern India                      |
| Web-figure 1.14 | Asia (Southern): Southern India                      |
| Web-figure 1.15 | Asia (Eastern and South-eastern)                     |
| Web-figure 1.16 | Asia (Eastern): China, Hong Kong and Taiwan          |
| Web-figure 1.17 | Asia (Eastern): Japan and Korea                      |
| Web-figure 1.18 | Asia (South-eastern)                                 |
| Web-figure 1.19 | Europe                                               |
| Web-figure 1.20 | Europe (Eastern): Russian Federation                 |
| Web-figure 1.21 | Europe (Eastern)                                     |
| Web-figure 1.22 | Europe (Western): Austria and Germany                |
| Web-figure 1.23 | Europe (Western): Switzerland                        |
| Web-figure 1.24 | Europe (Southern)                                    |
| Web-figure 1.25 | Europe (Southern): Italy (South and Islands)         |
| Web-figure 1.26 | Europe (Southern): Iberian Peninsula                 |
| Web-figure 1.27 | Europe (Western): Belgium and France                 |
| Web-figure 1.28 | Europe (Northern): Ireland and UK                    |
| Web-figure 1.29 | Oceania                                              |

**Children**

|                 |                                                  |
|-----------------|--------------------------------------------------|
| Web-figure 1.30 | World [for adults, see Figure 1 in main article] |
|-----------------|--------------------------------------------------|

|                                                                                     |                                                |
|-------------------------------------------------------------------------------------|------------------------------------------------|
| 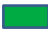 | Dark green: National coverage                  |
| 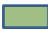 | Light green: Regional coverage                 |
| 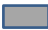 | Grey: Regions for which no data were available |
| 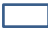 | White: No coverage in this country             |

The maps show the territories for which we received data. Some registries only provided data for part of their territory.

The names of countries and territories used in this web-appendix are those used for statistical purposes by the Statistics Division of the UN Secretariat.<sup>24</sup> We use “national coverage” to contrast with “regional coverage” solely for statistical purposes. These designations and the presentation of data here do not imply any assumption regarding the political affiliation of countries or territories, or the expression of any opinion whatsoever on the part of the CONCORD programme concerning the legal status of any country, territory, city or area or of its authorities, or concerning the delimitation of its frontiers or boundaries.

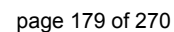

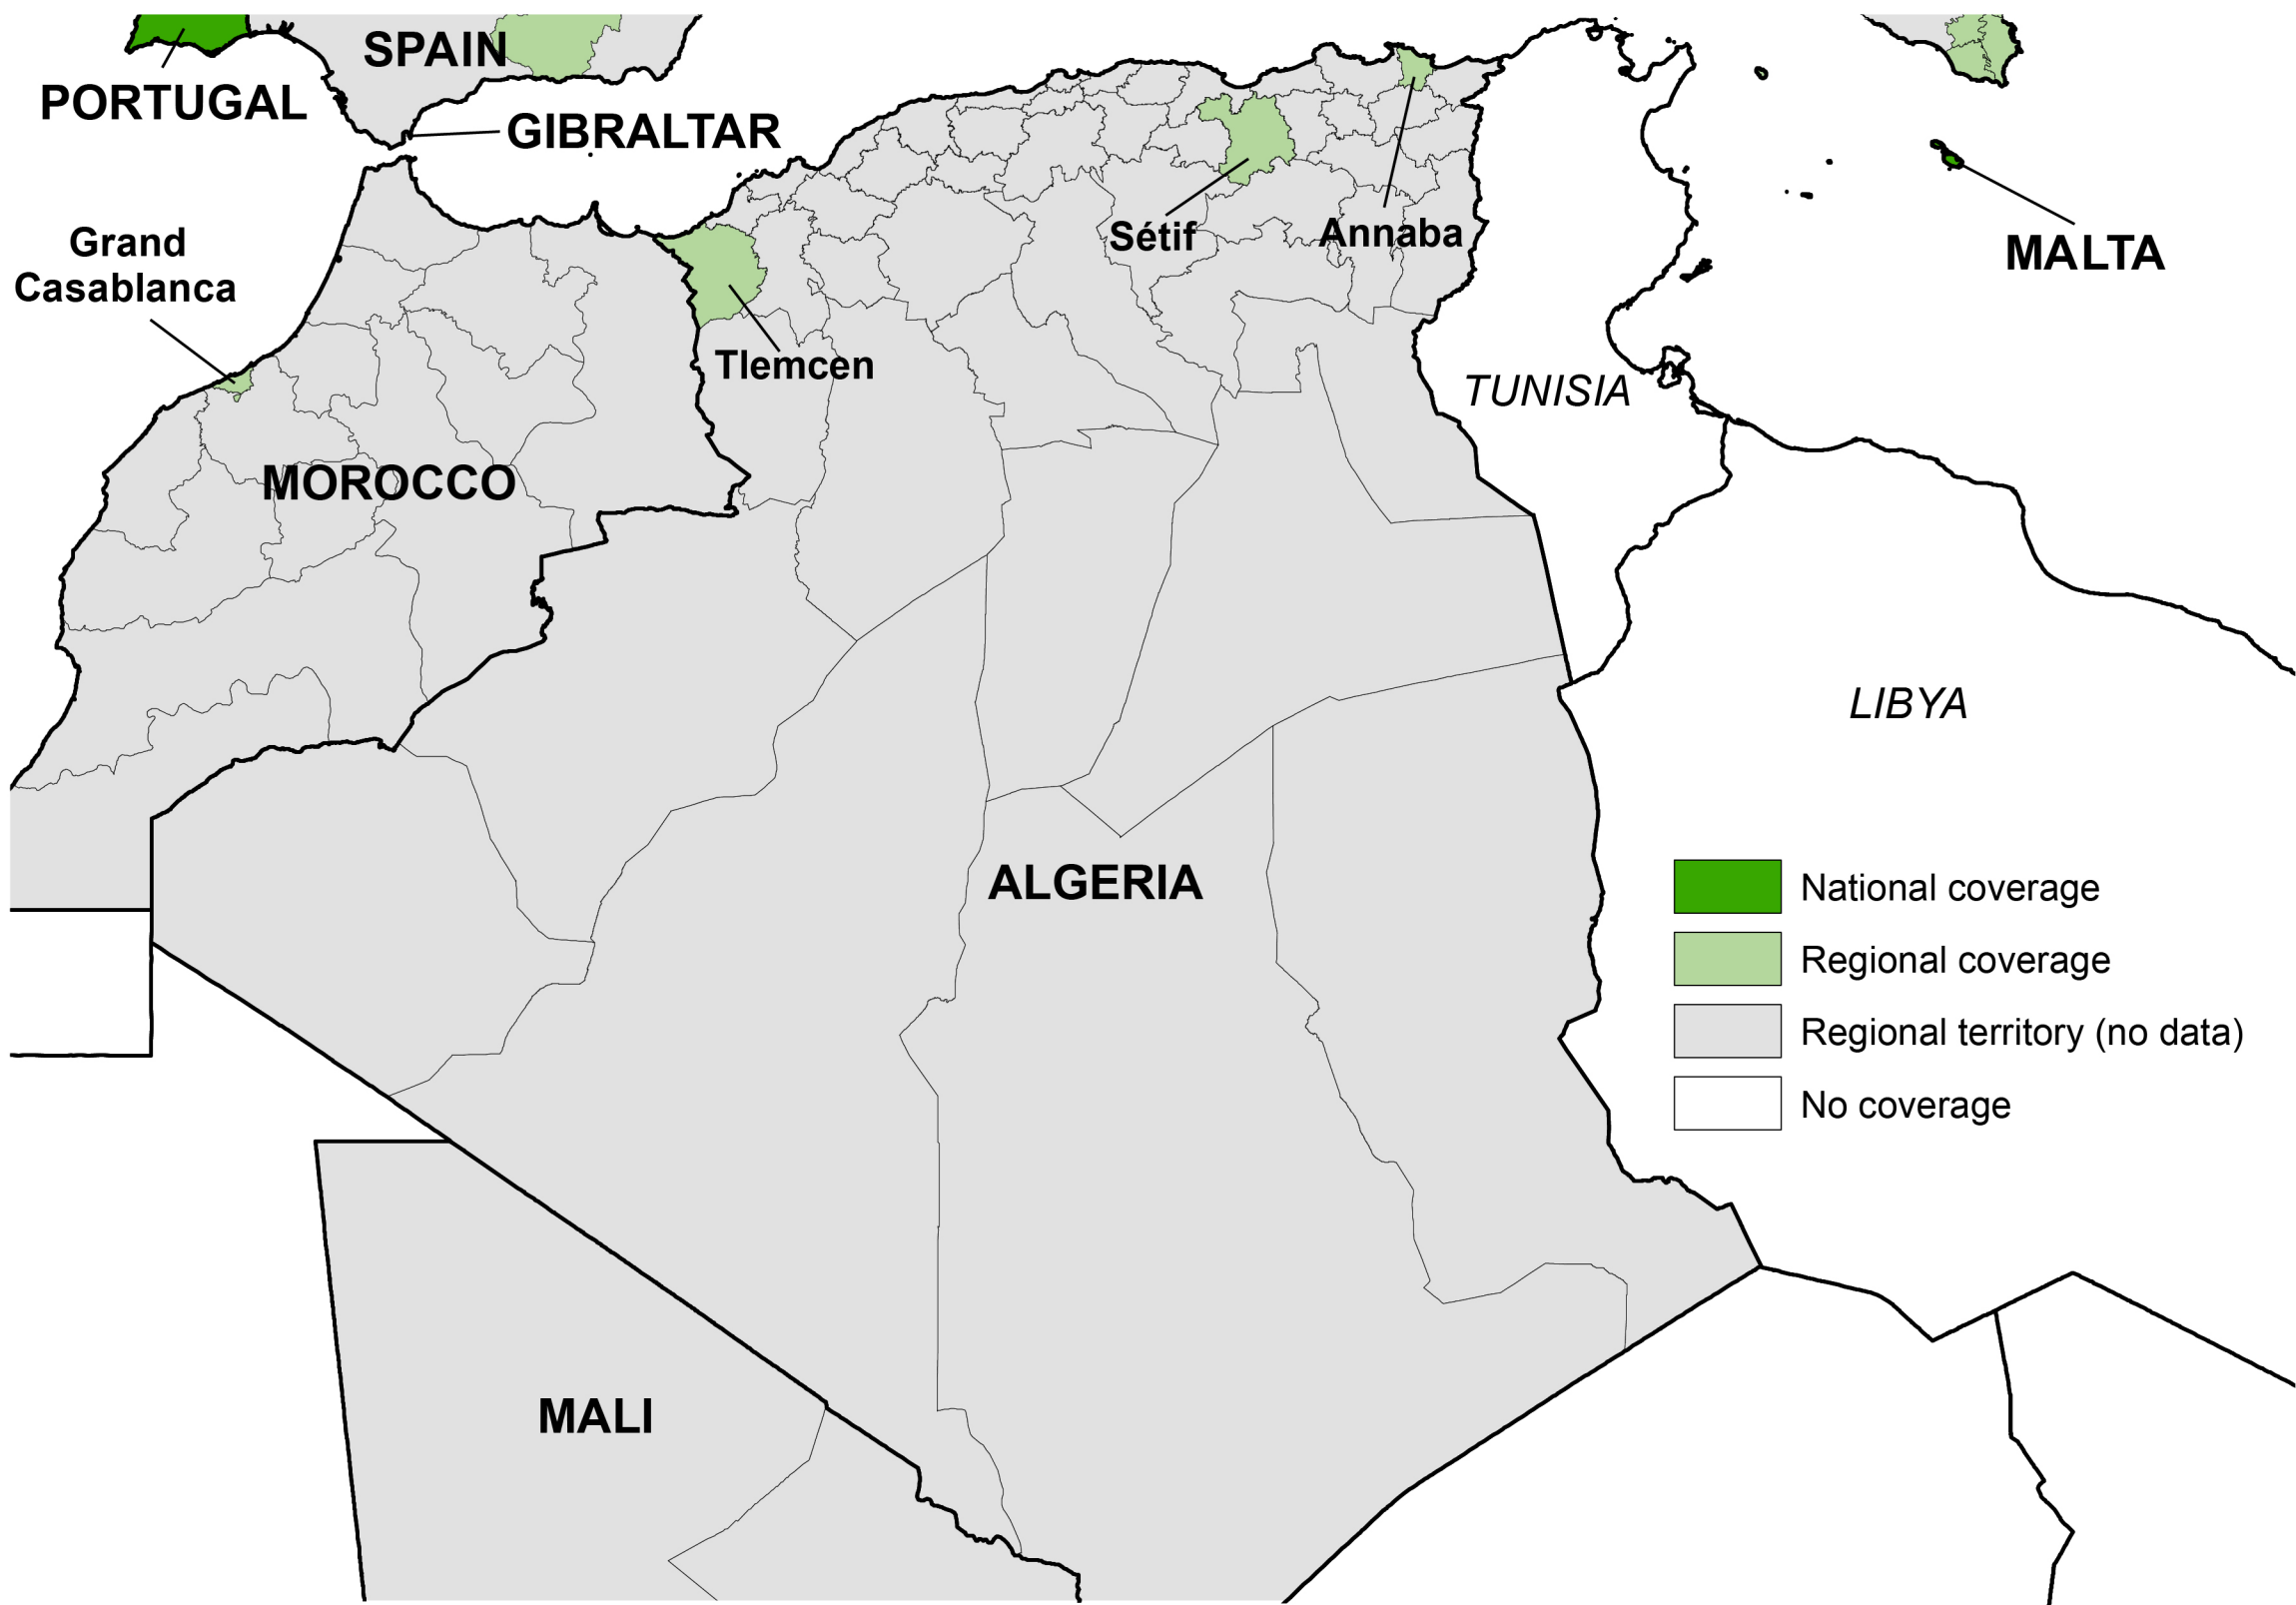

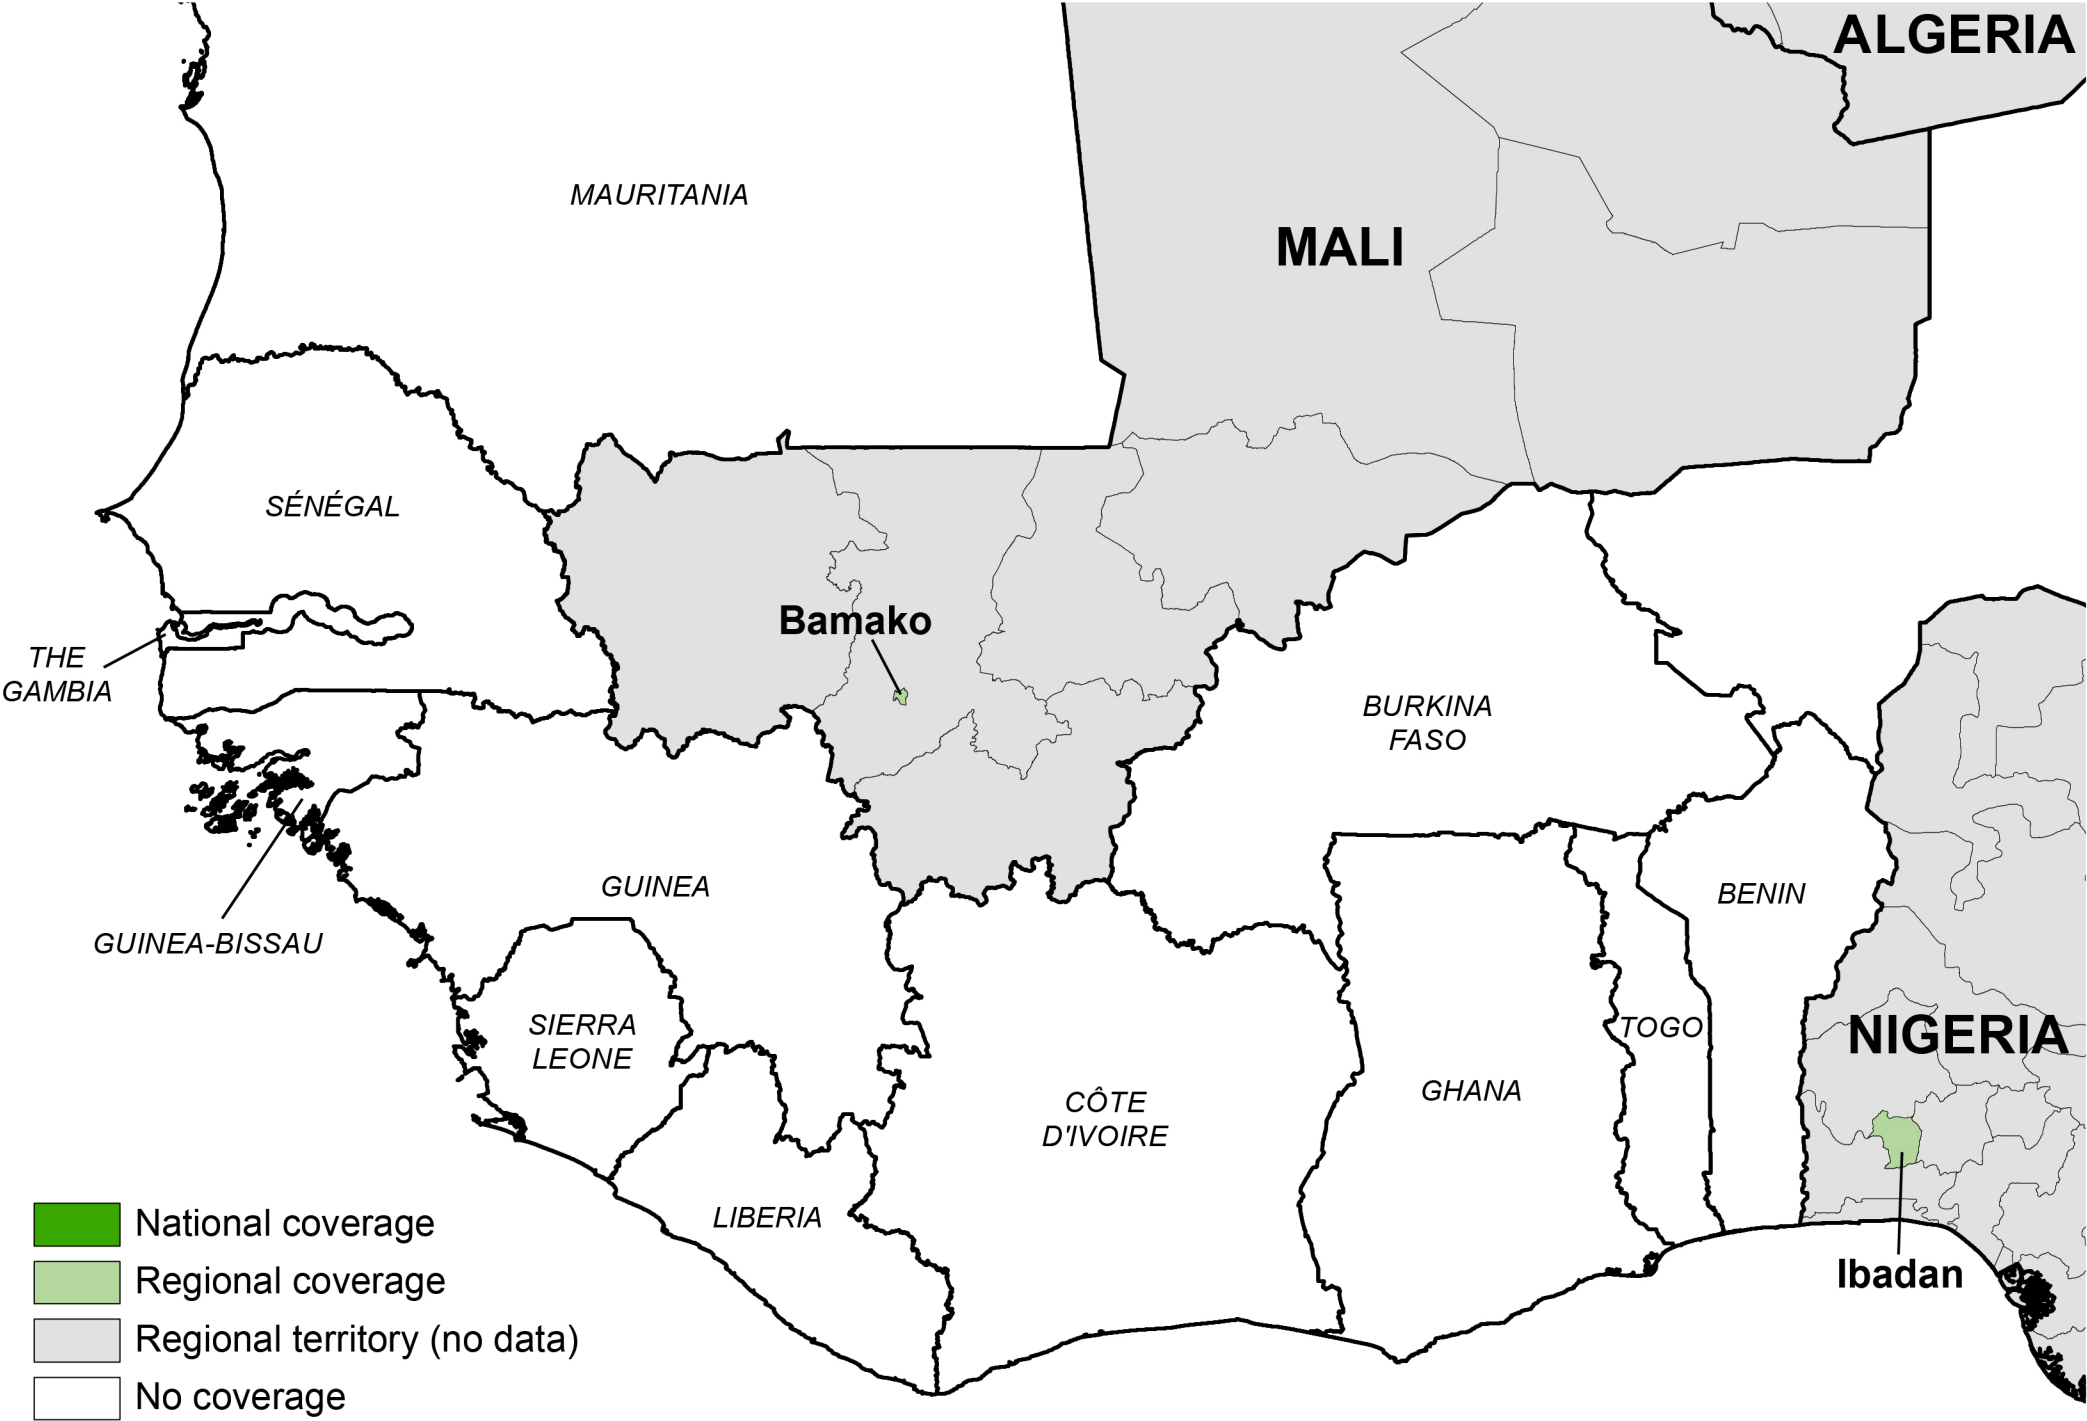

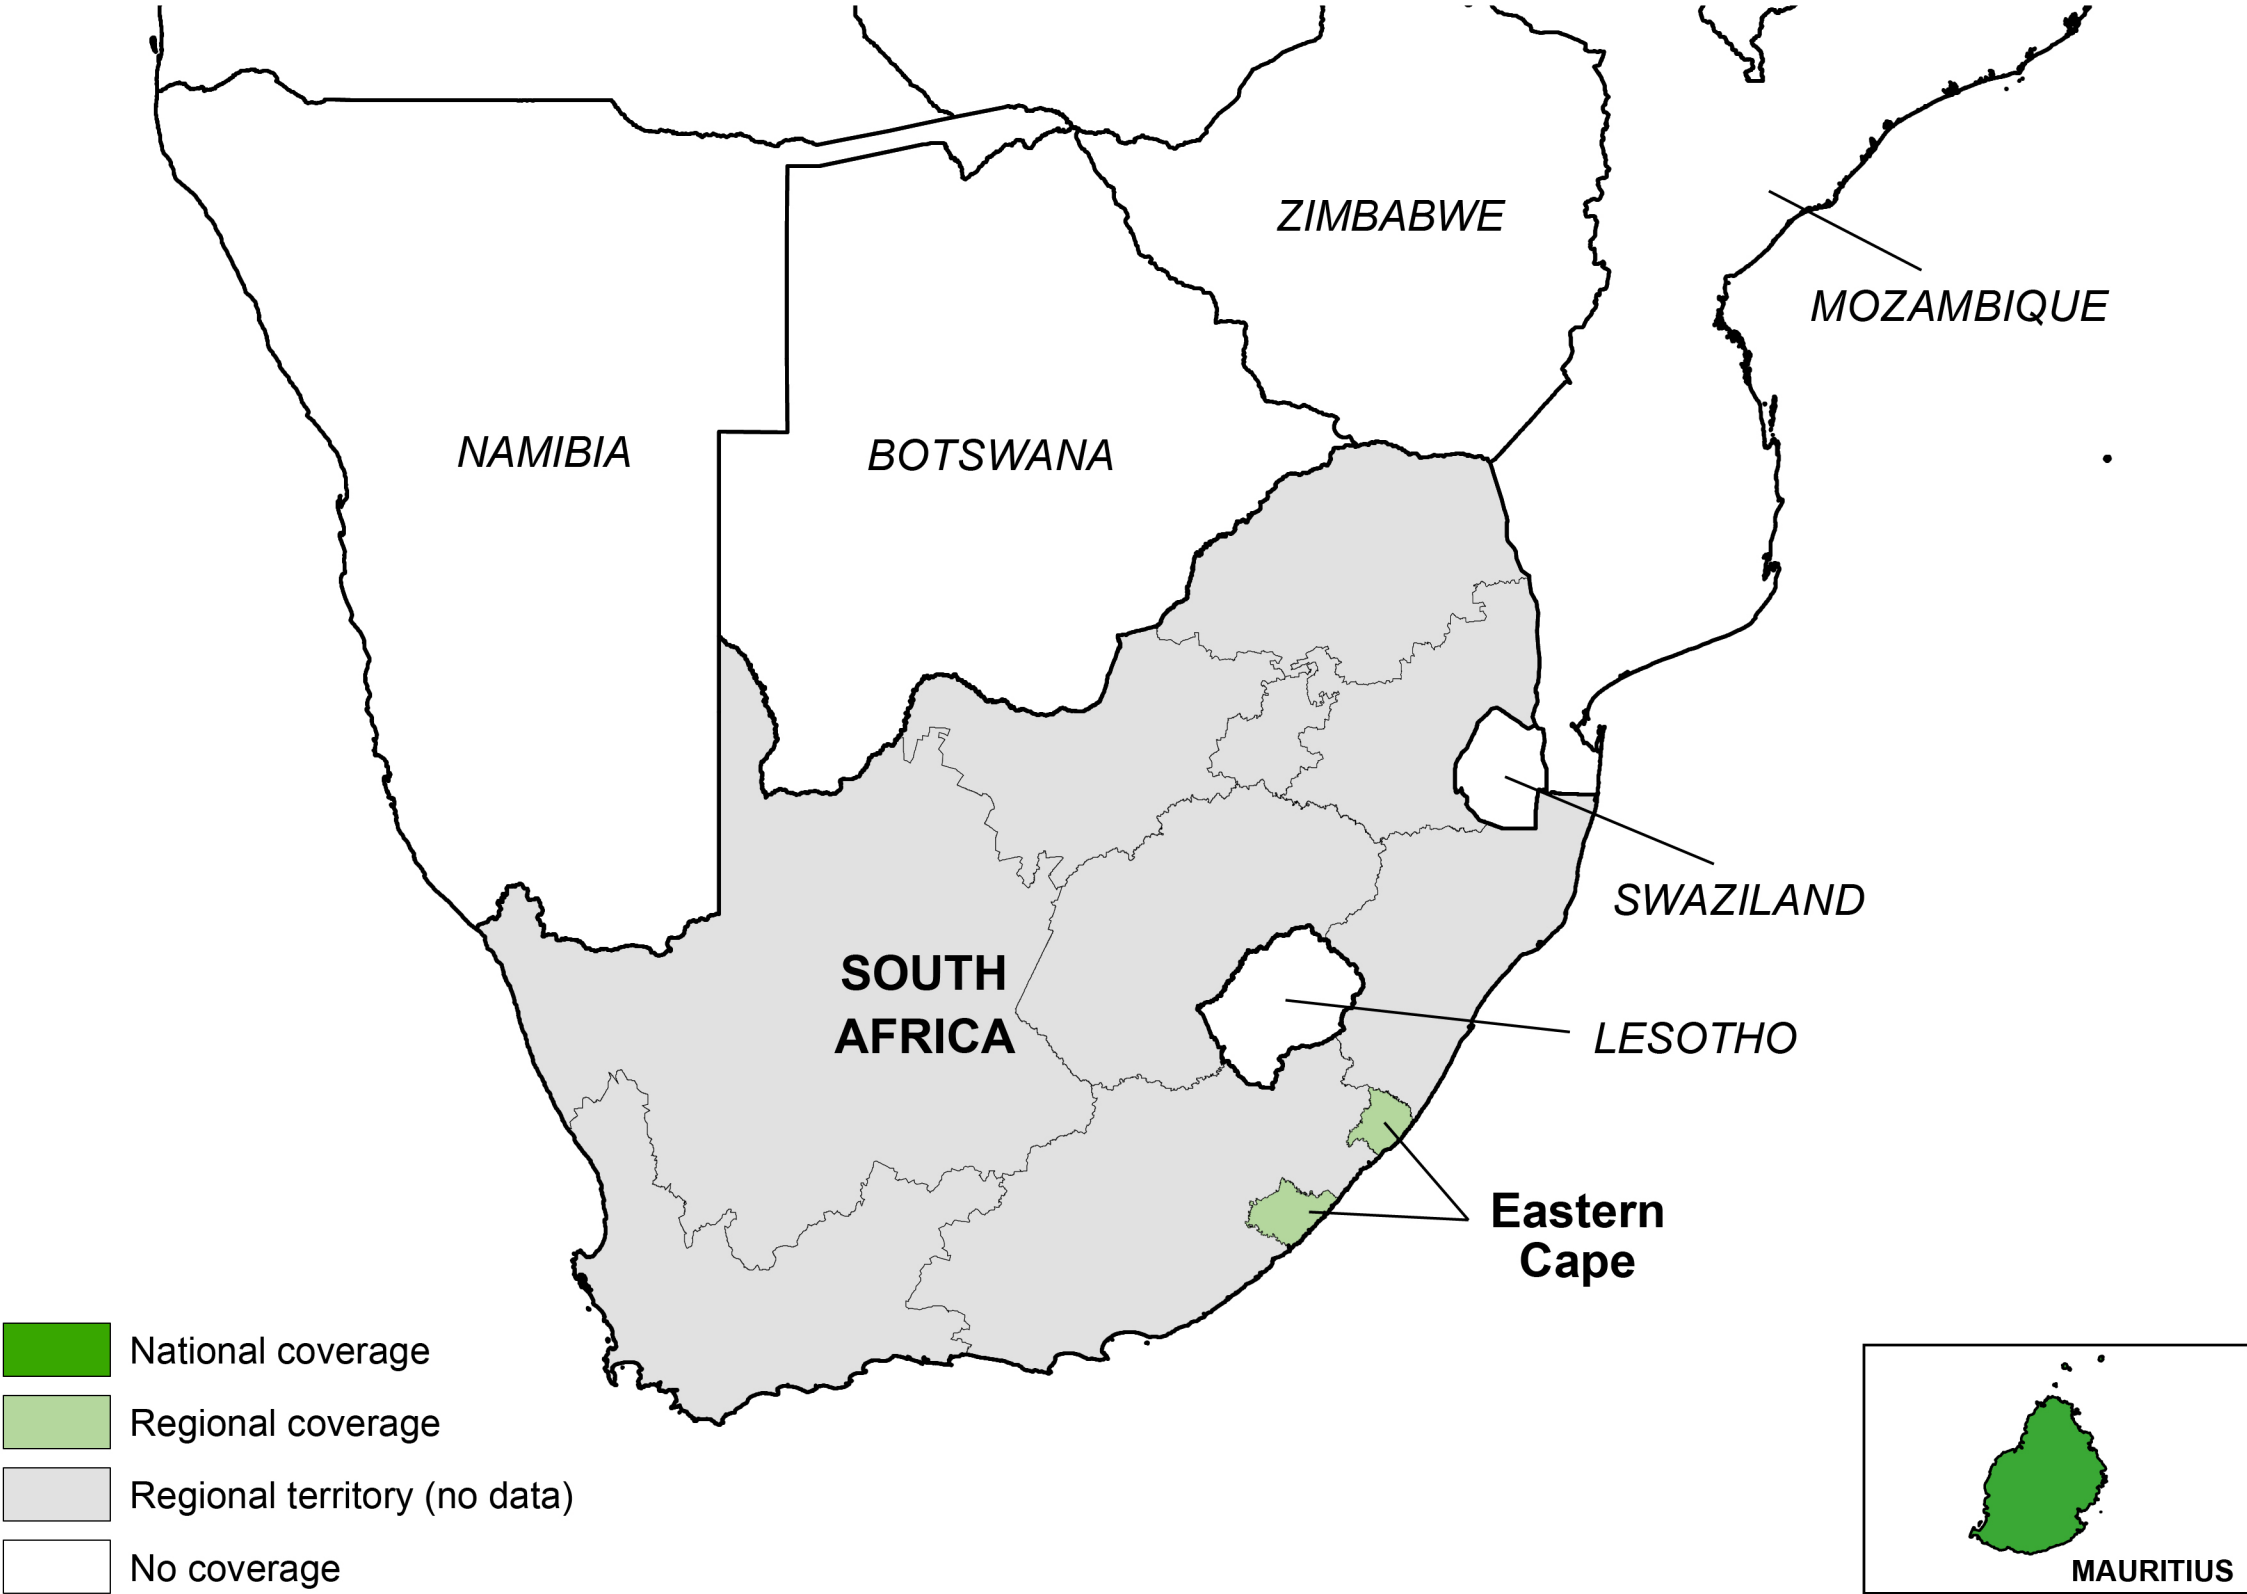

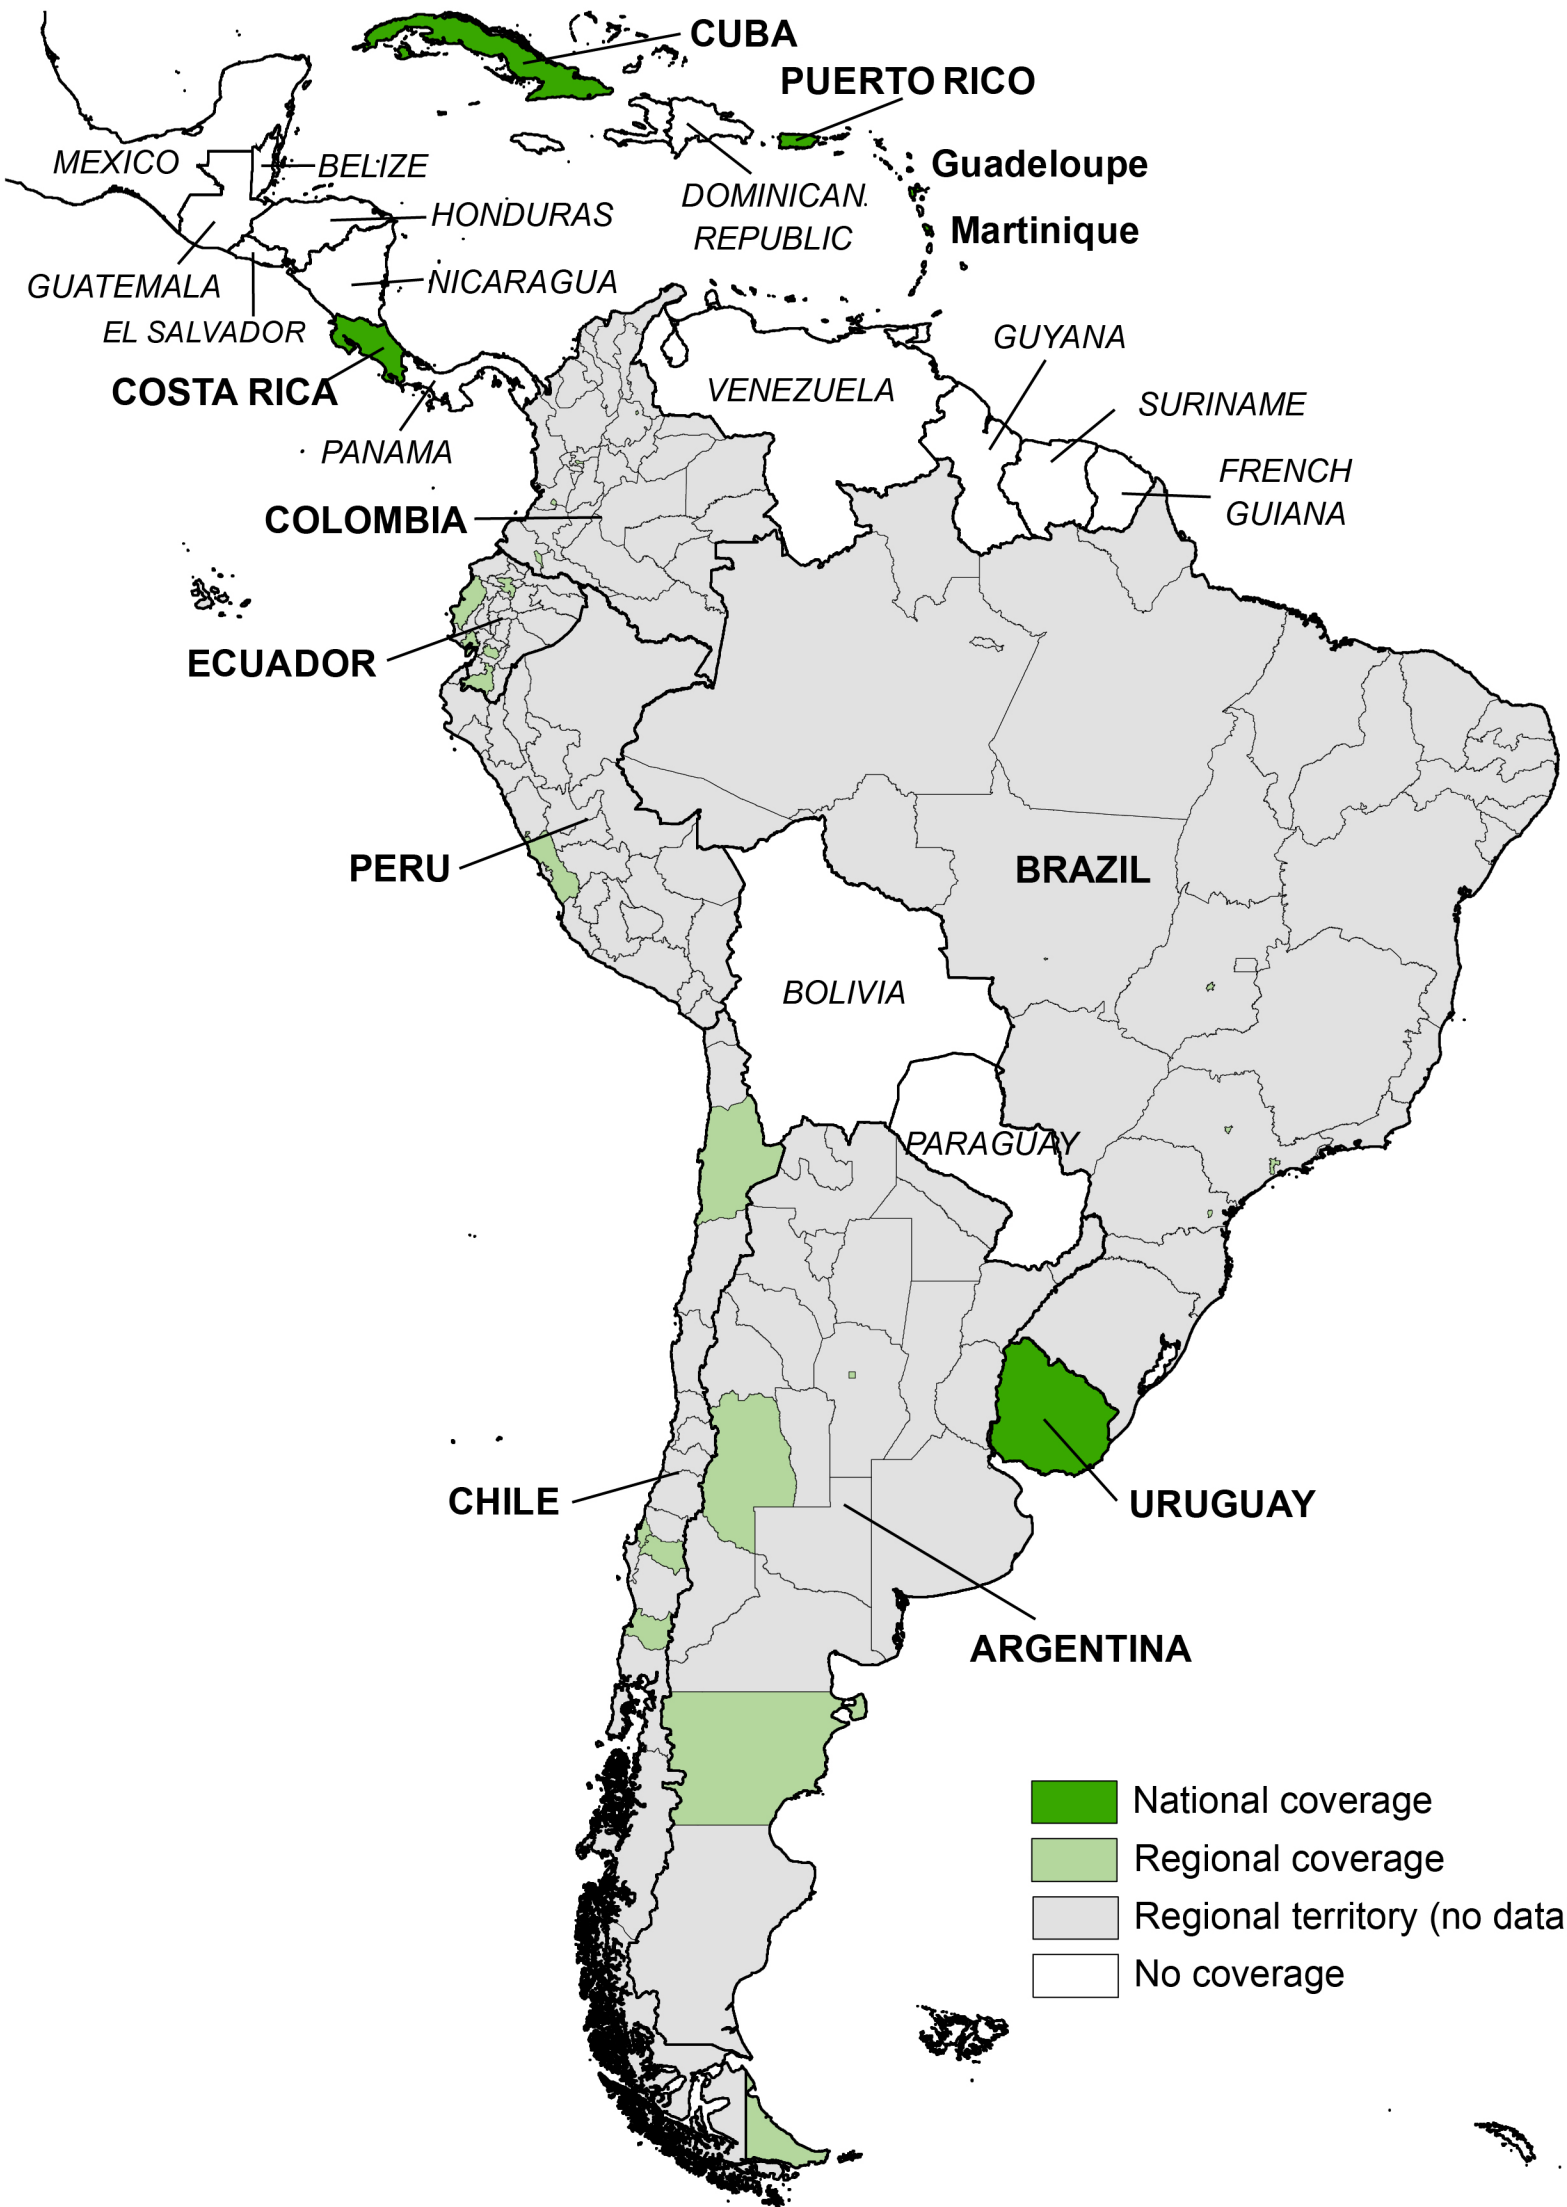

Web-figure 1.6: Americas (Latin America and the Caribbean): Northern

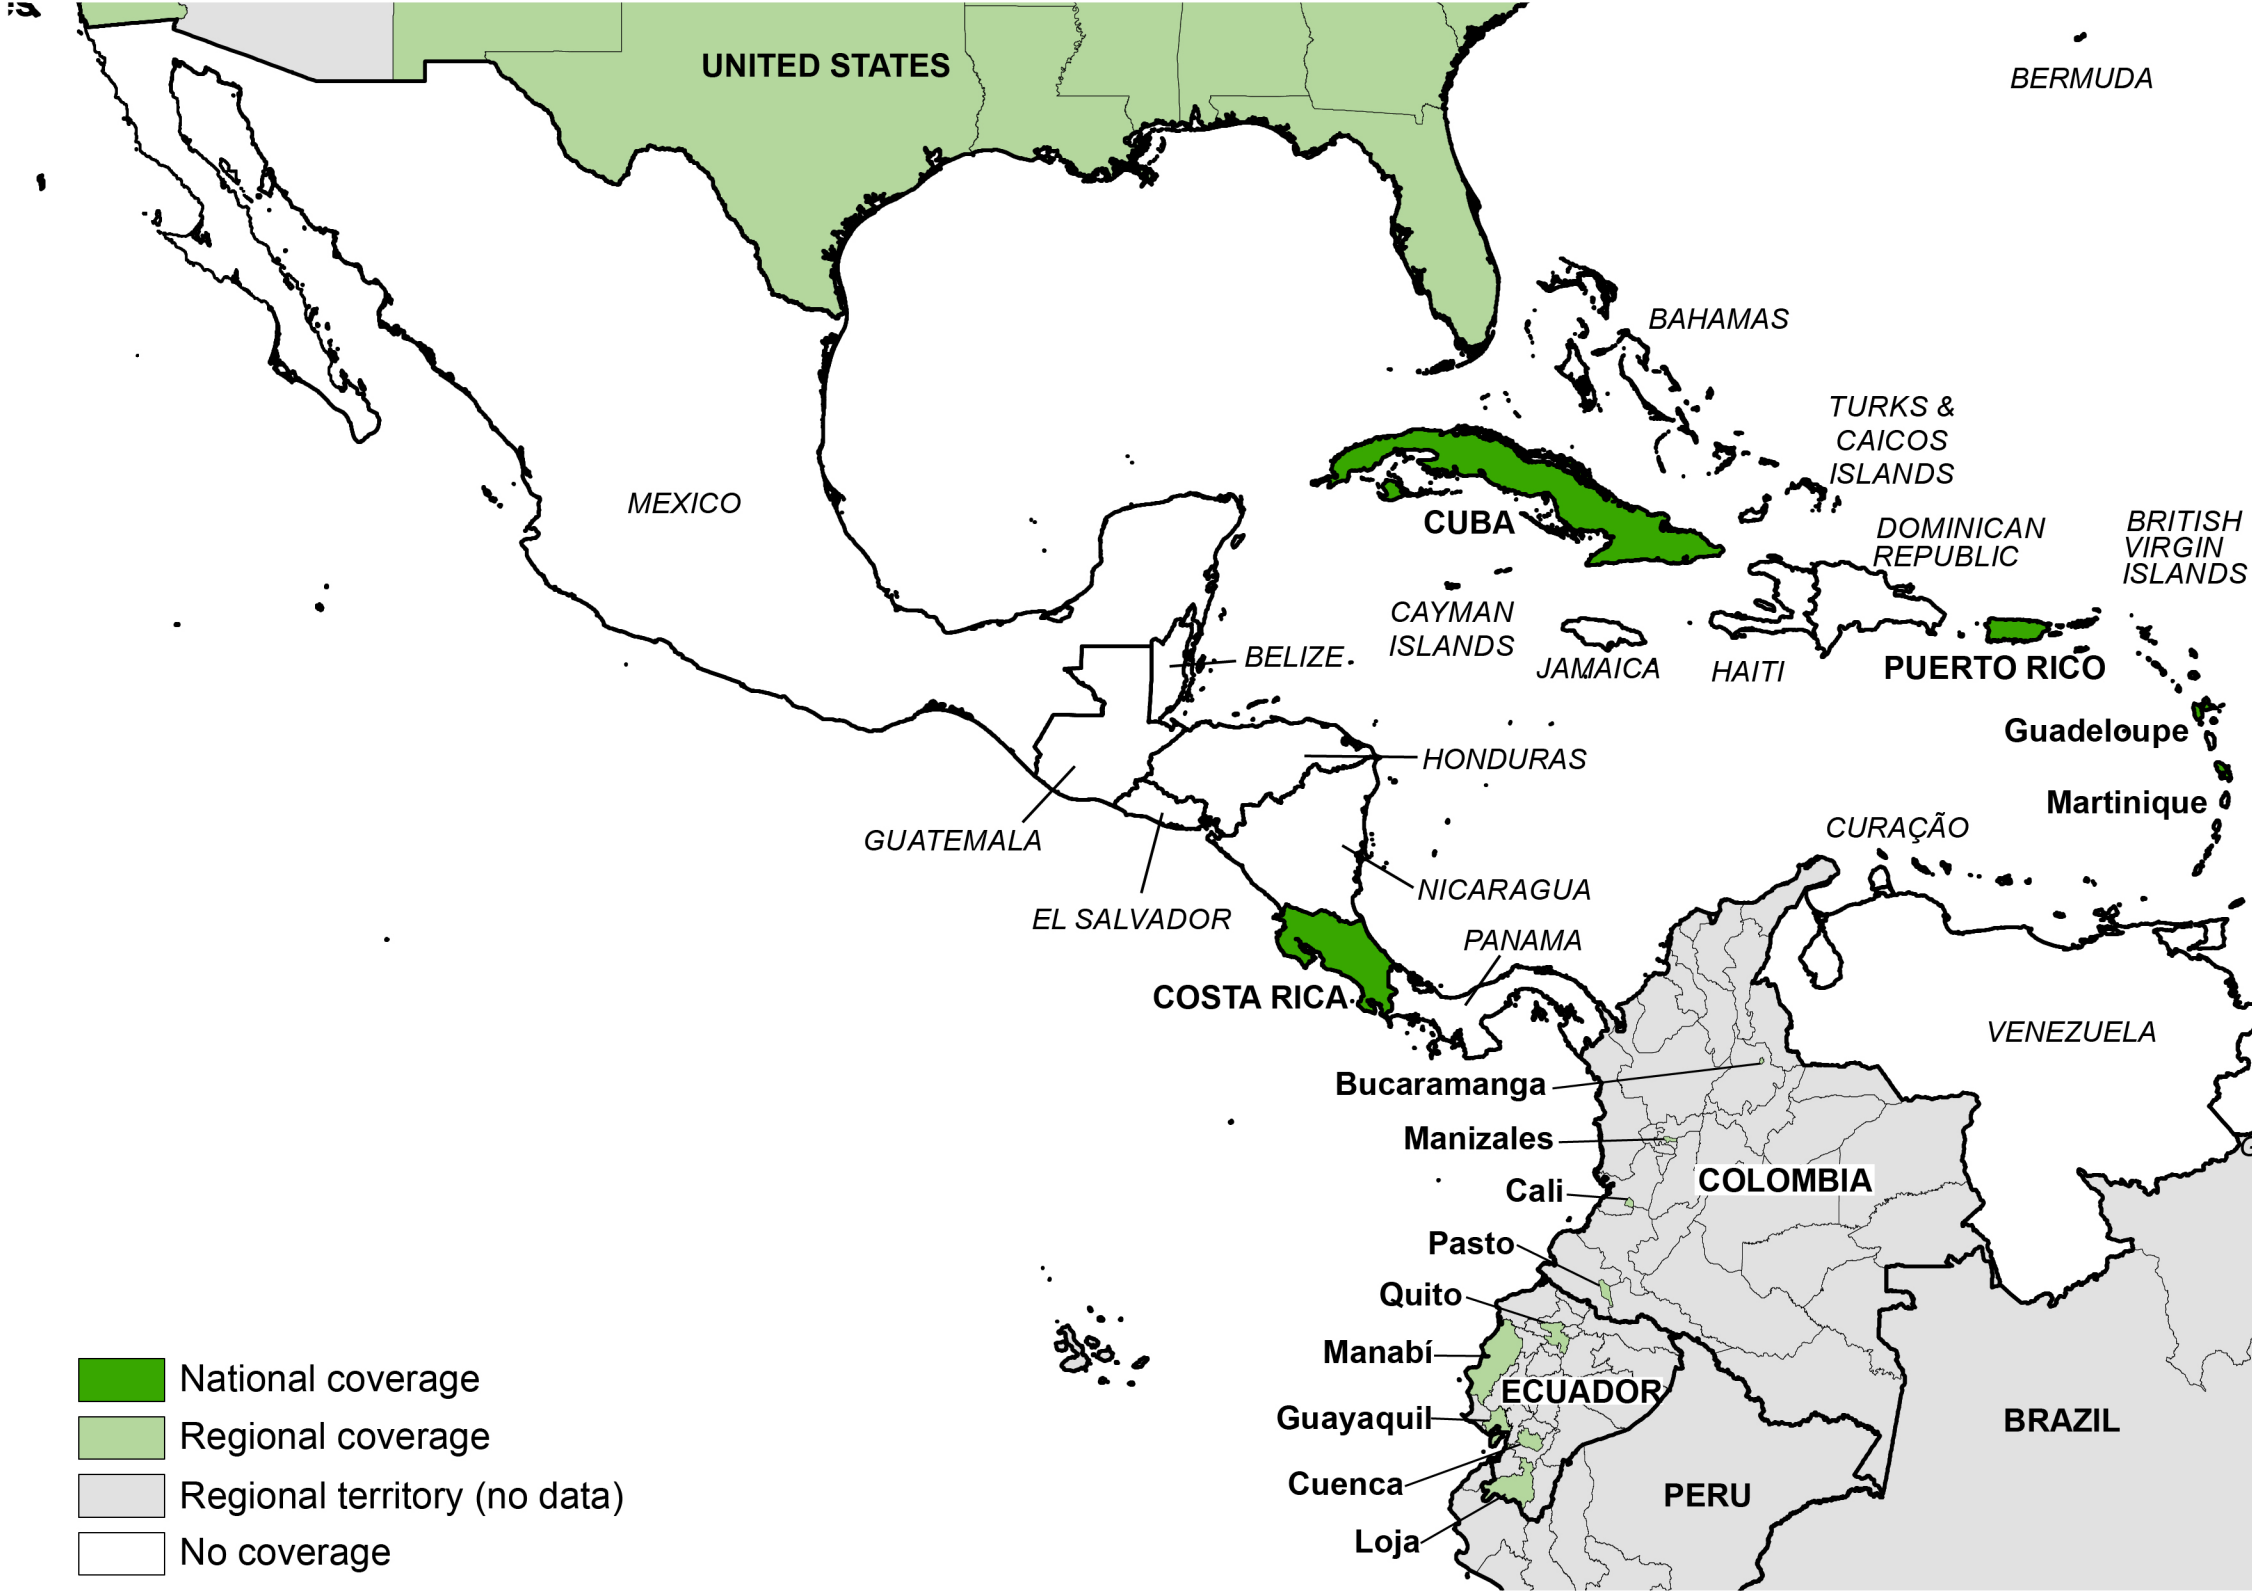

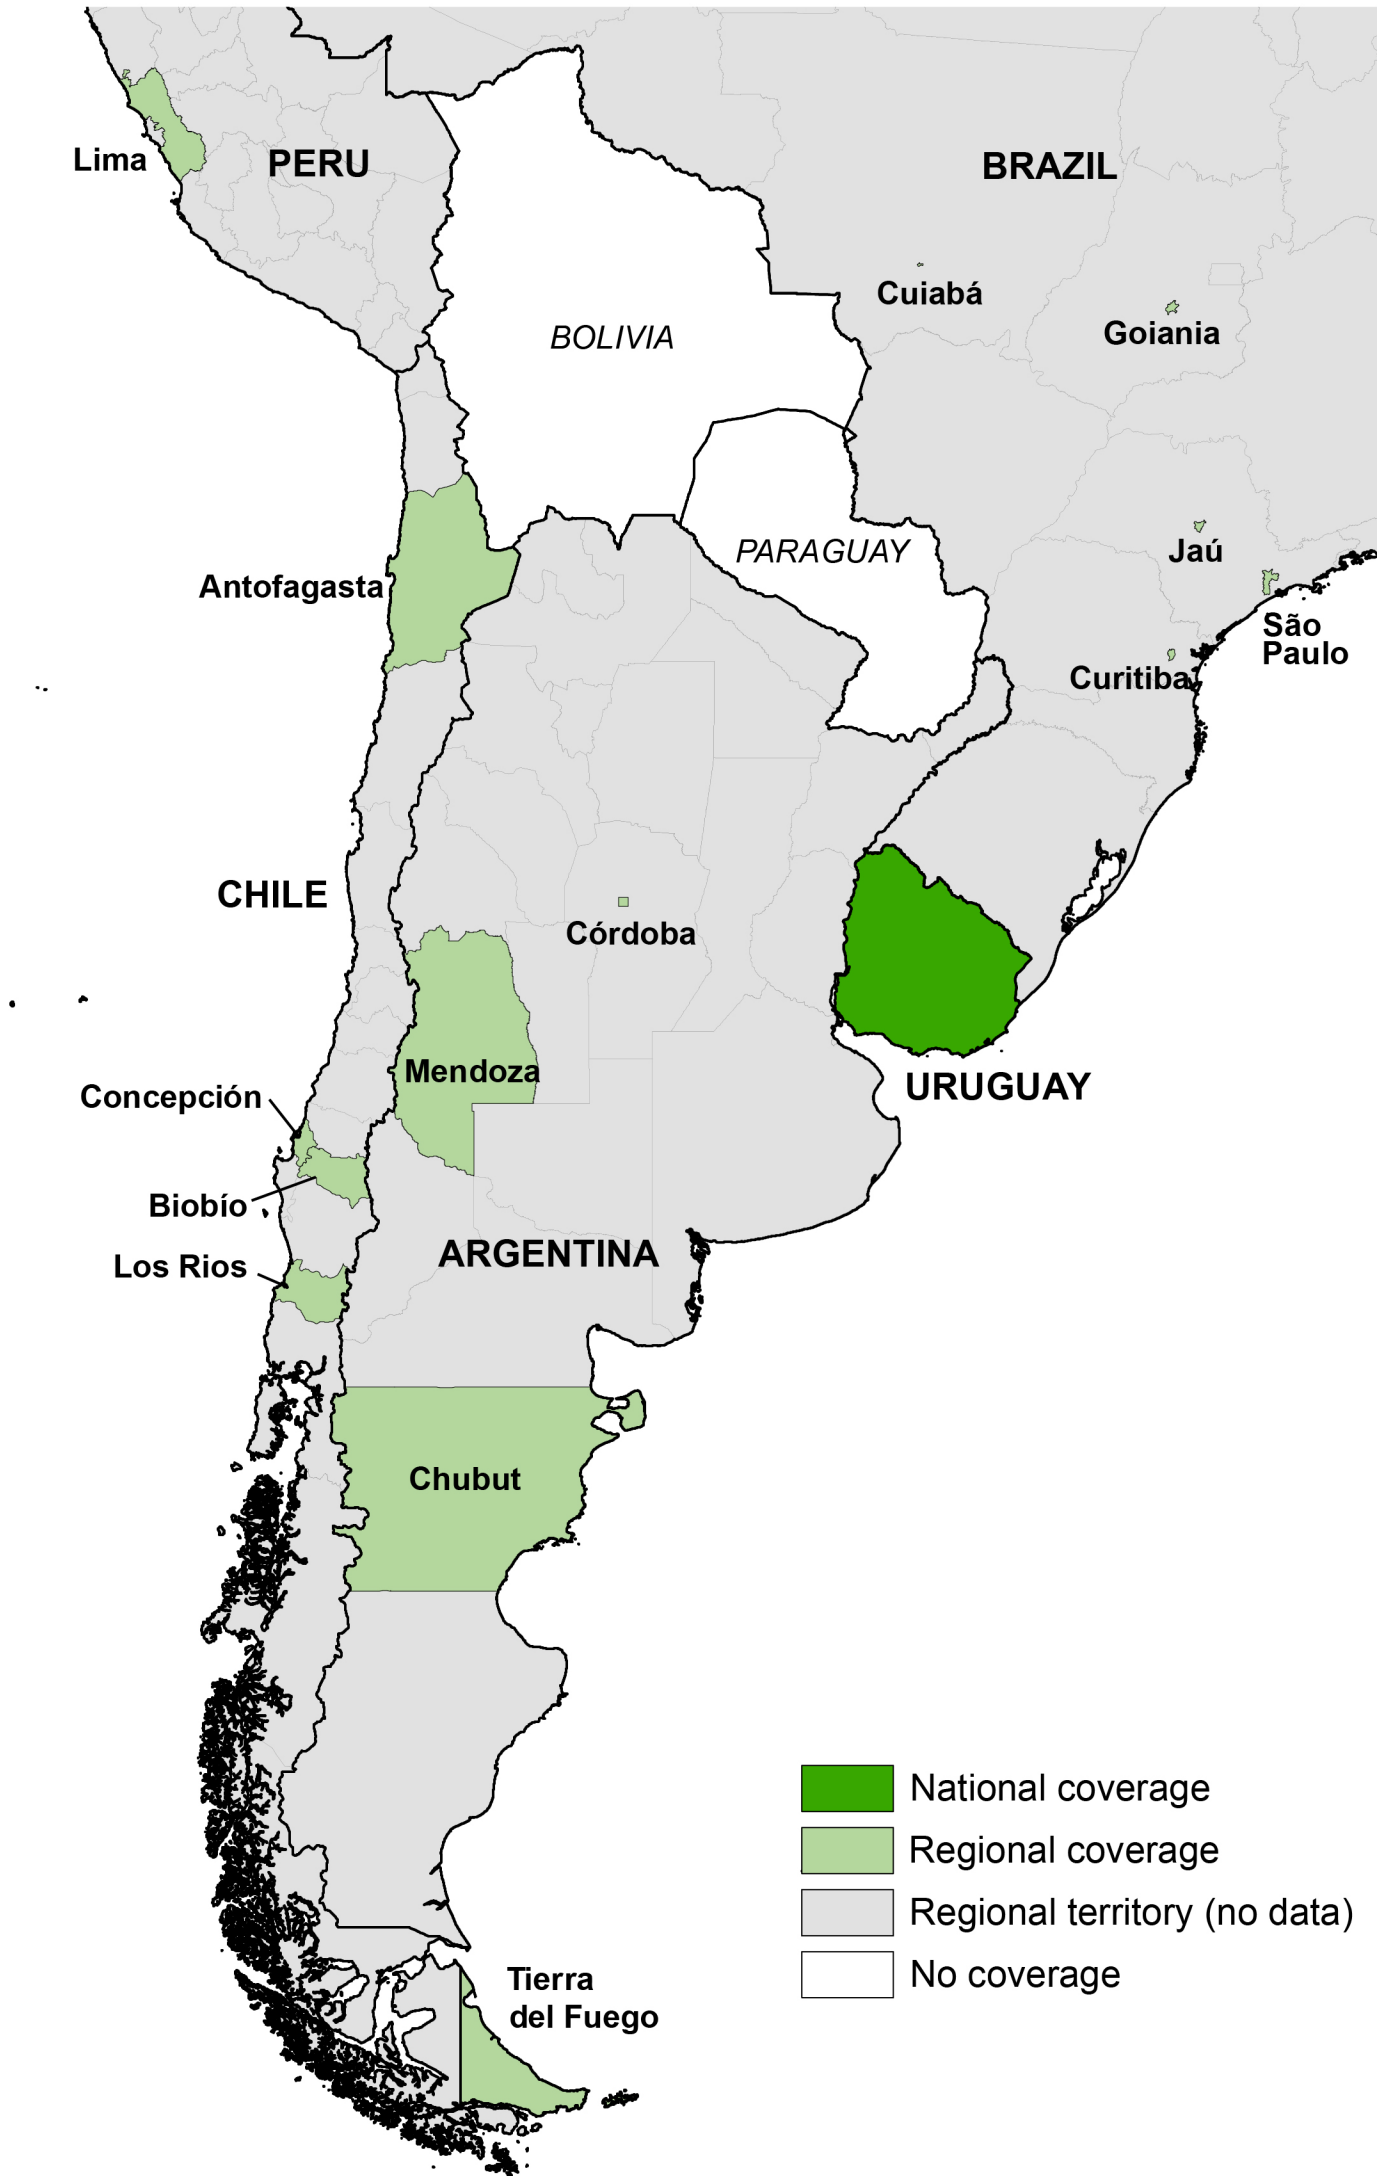

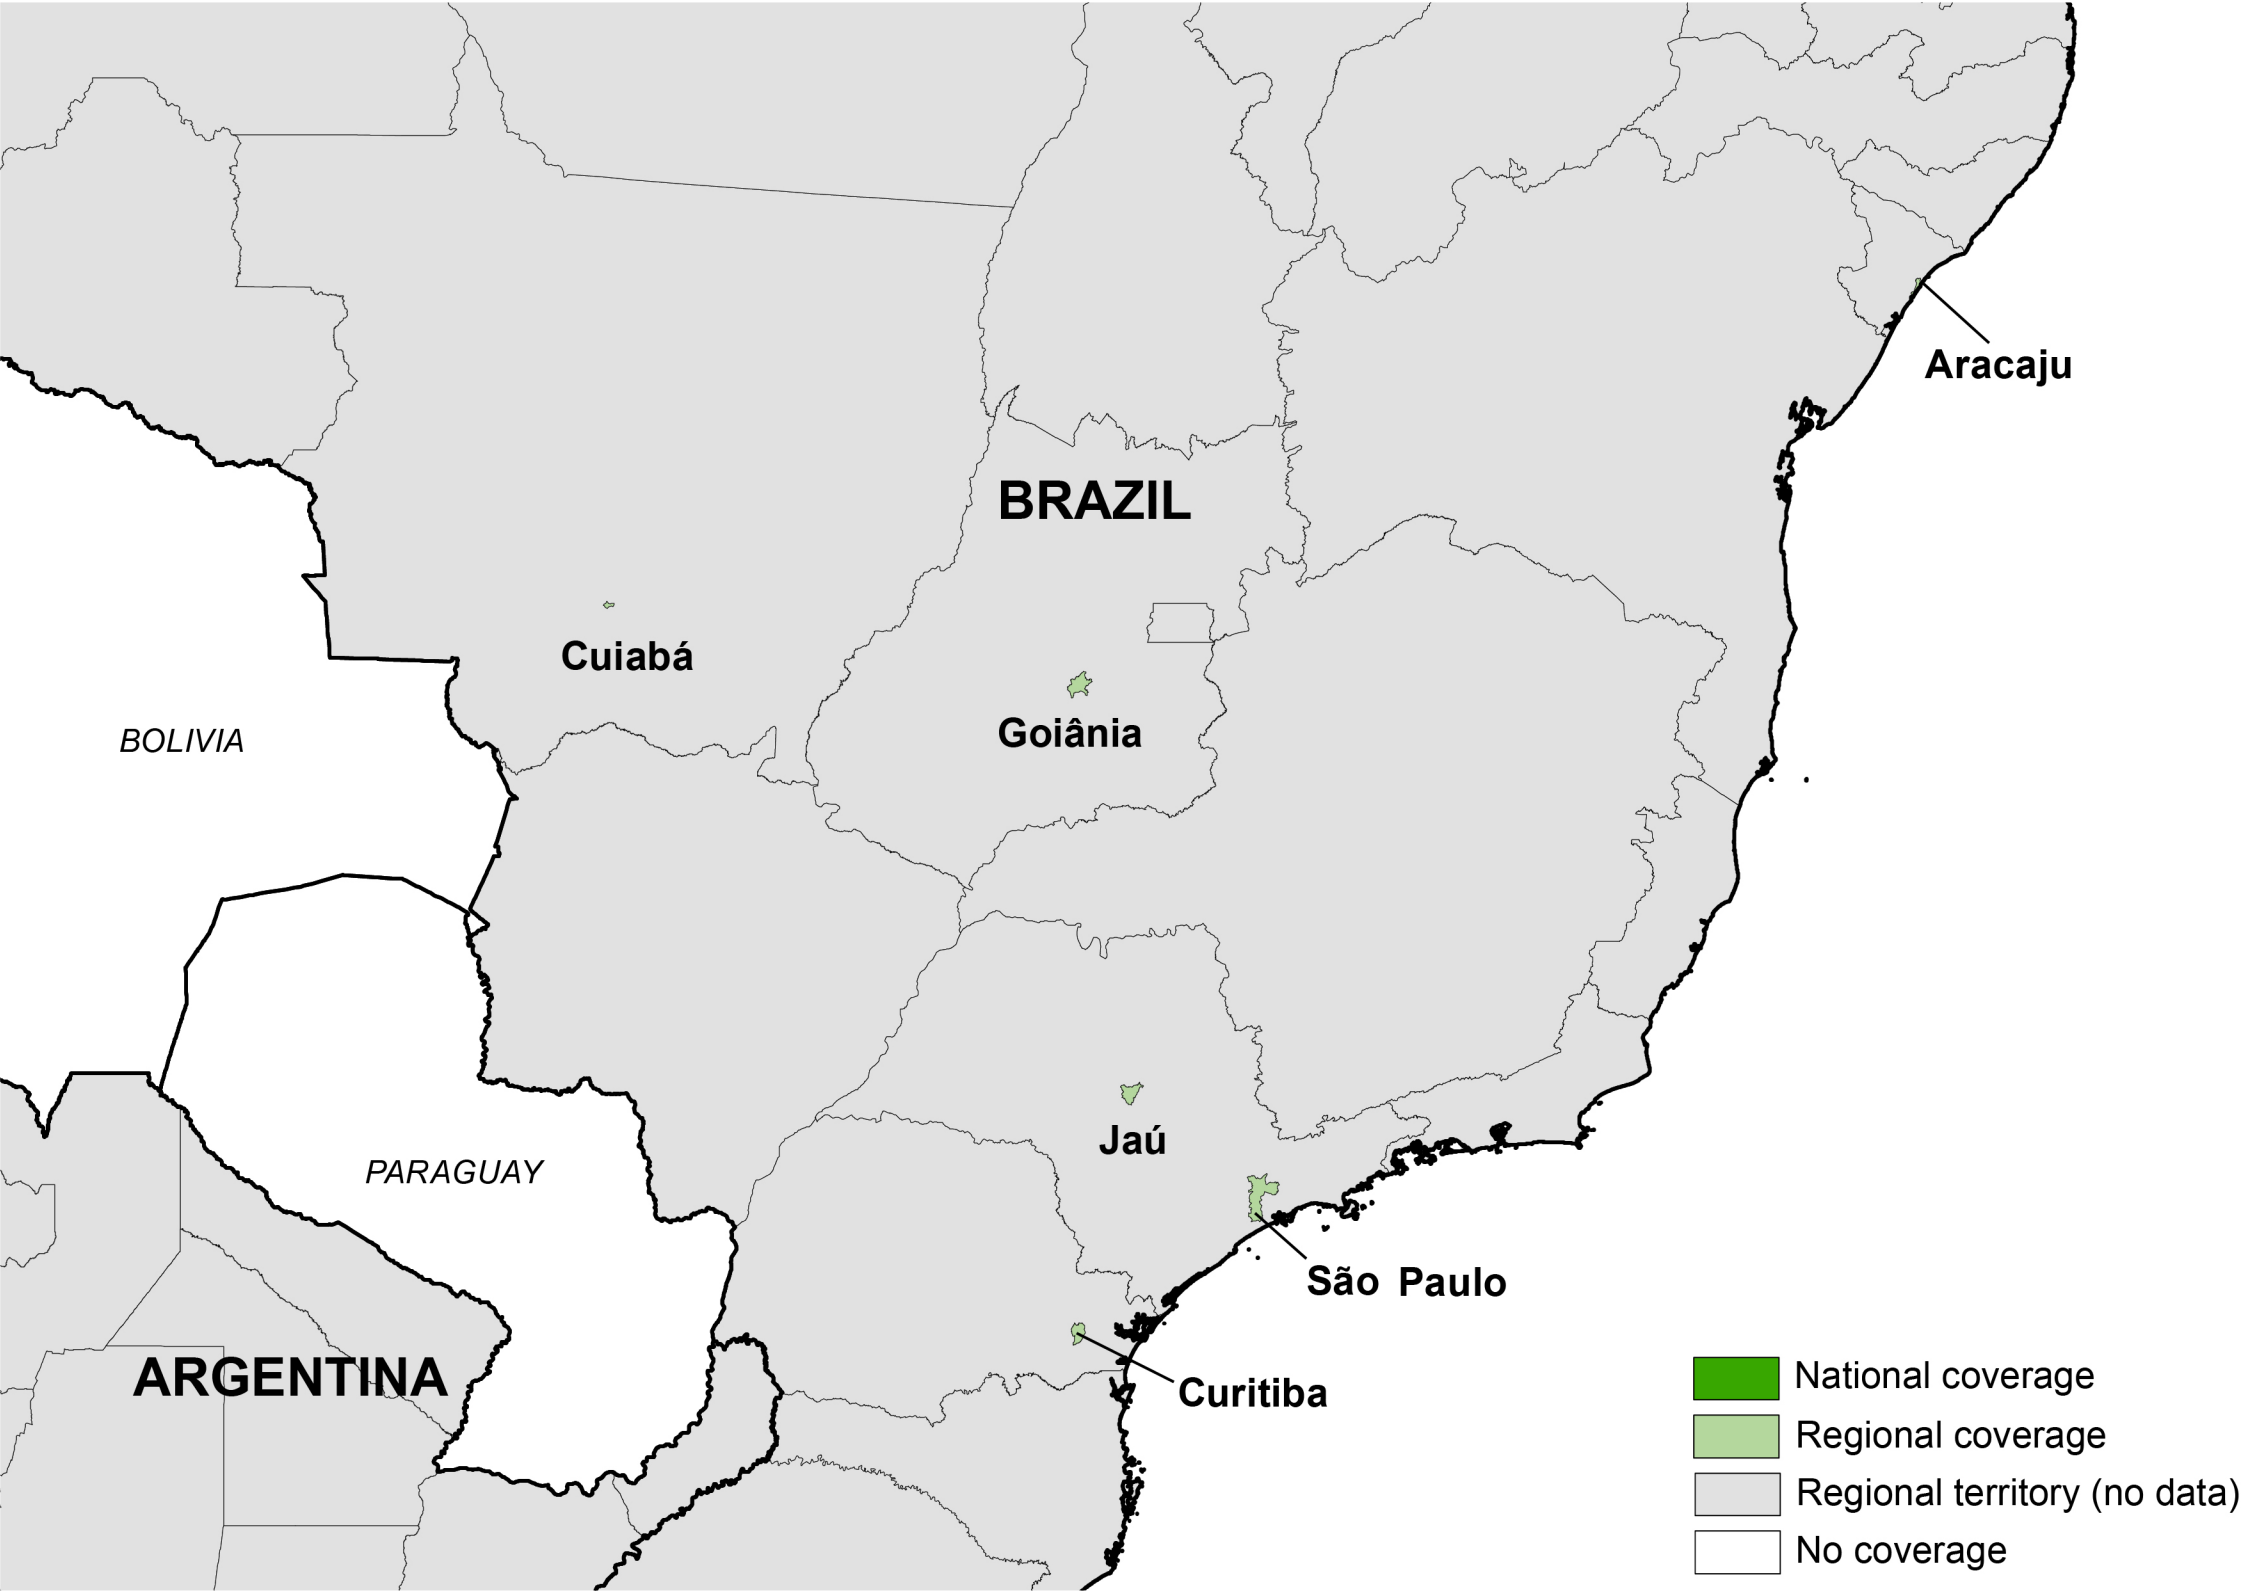

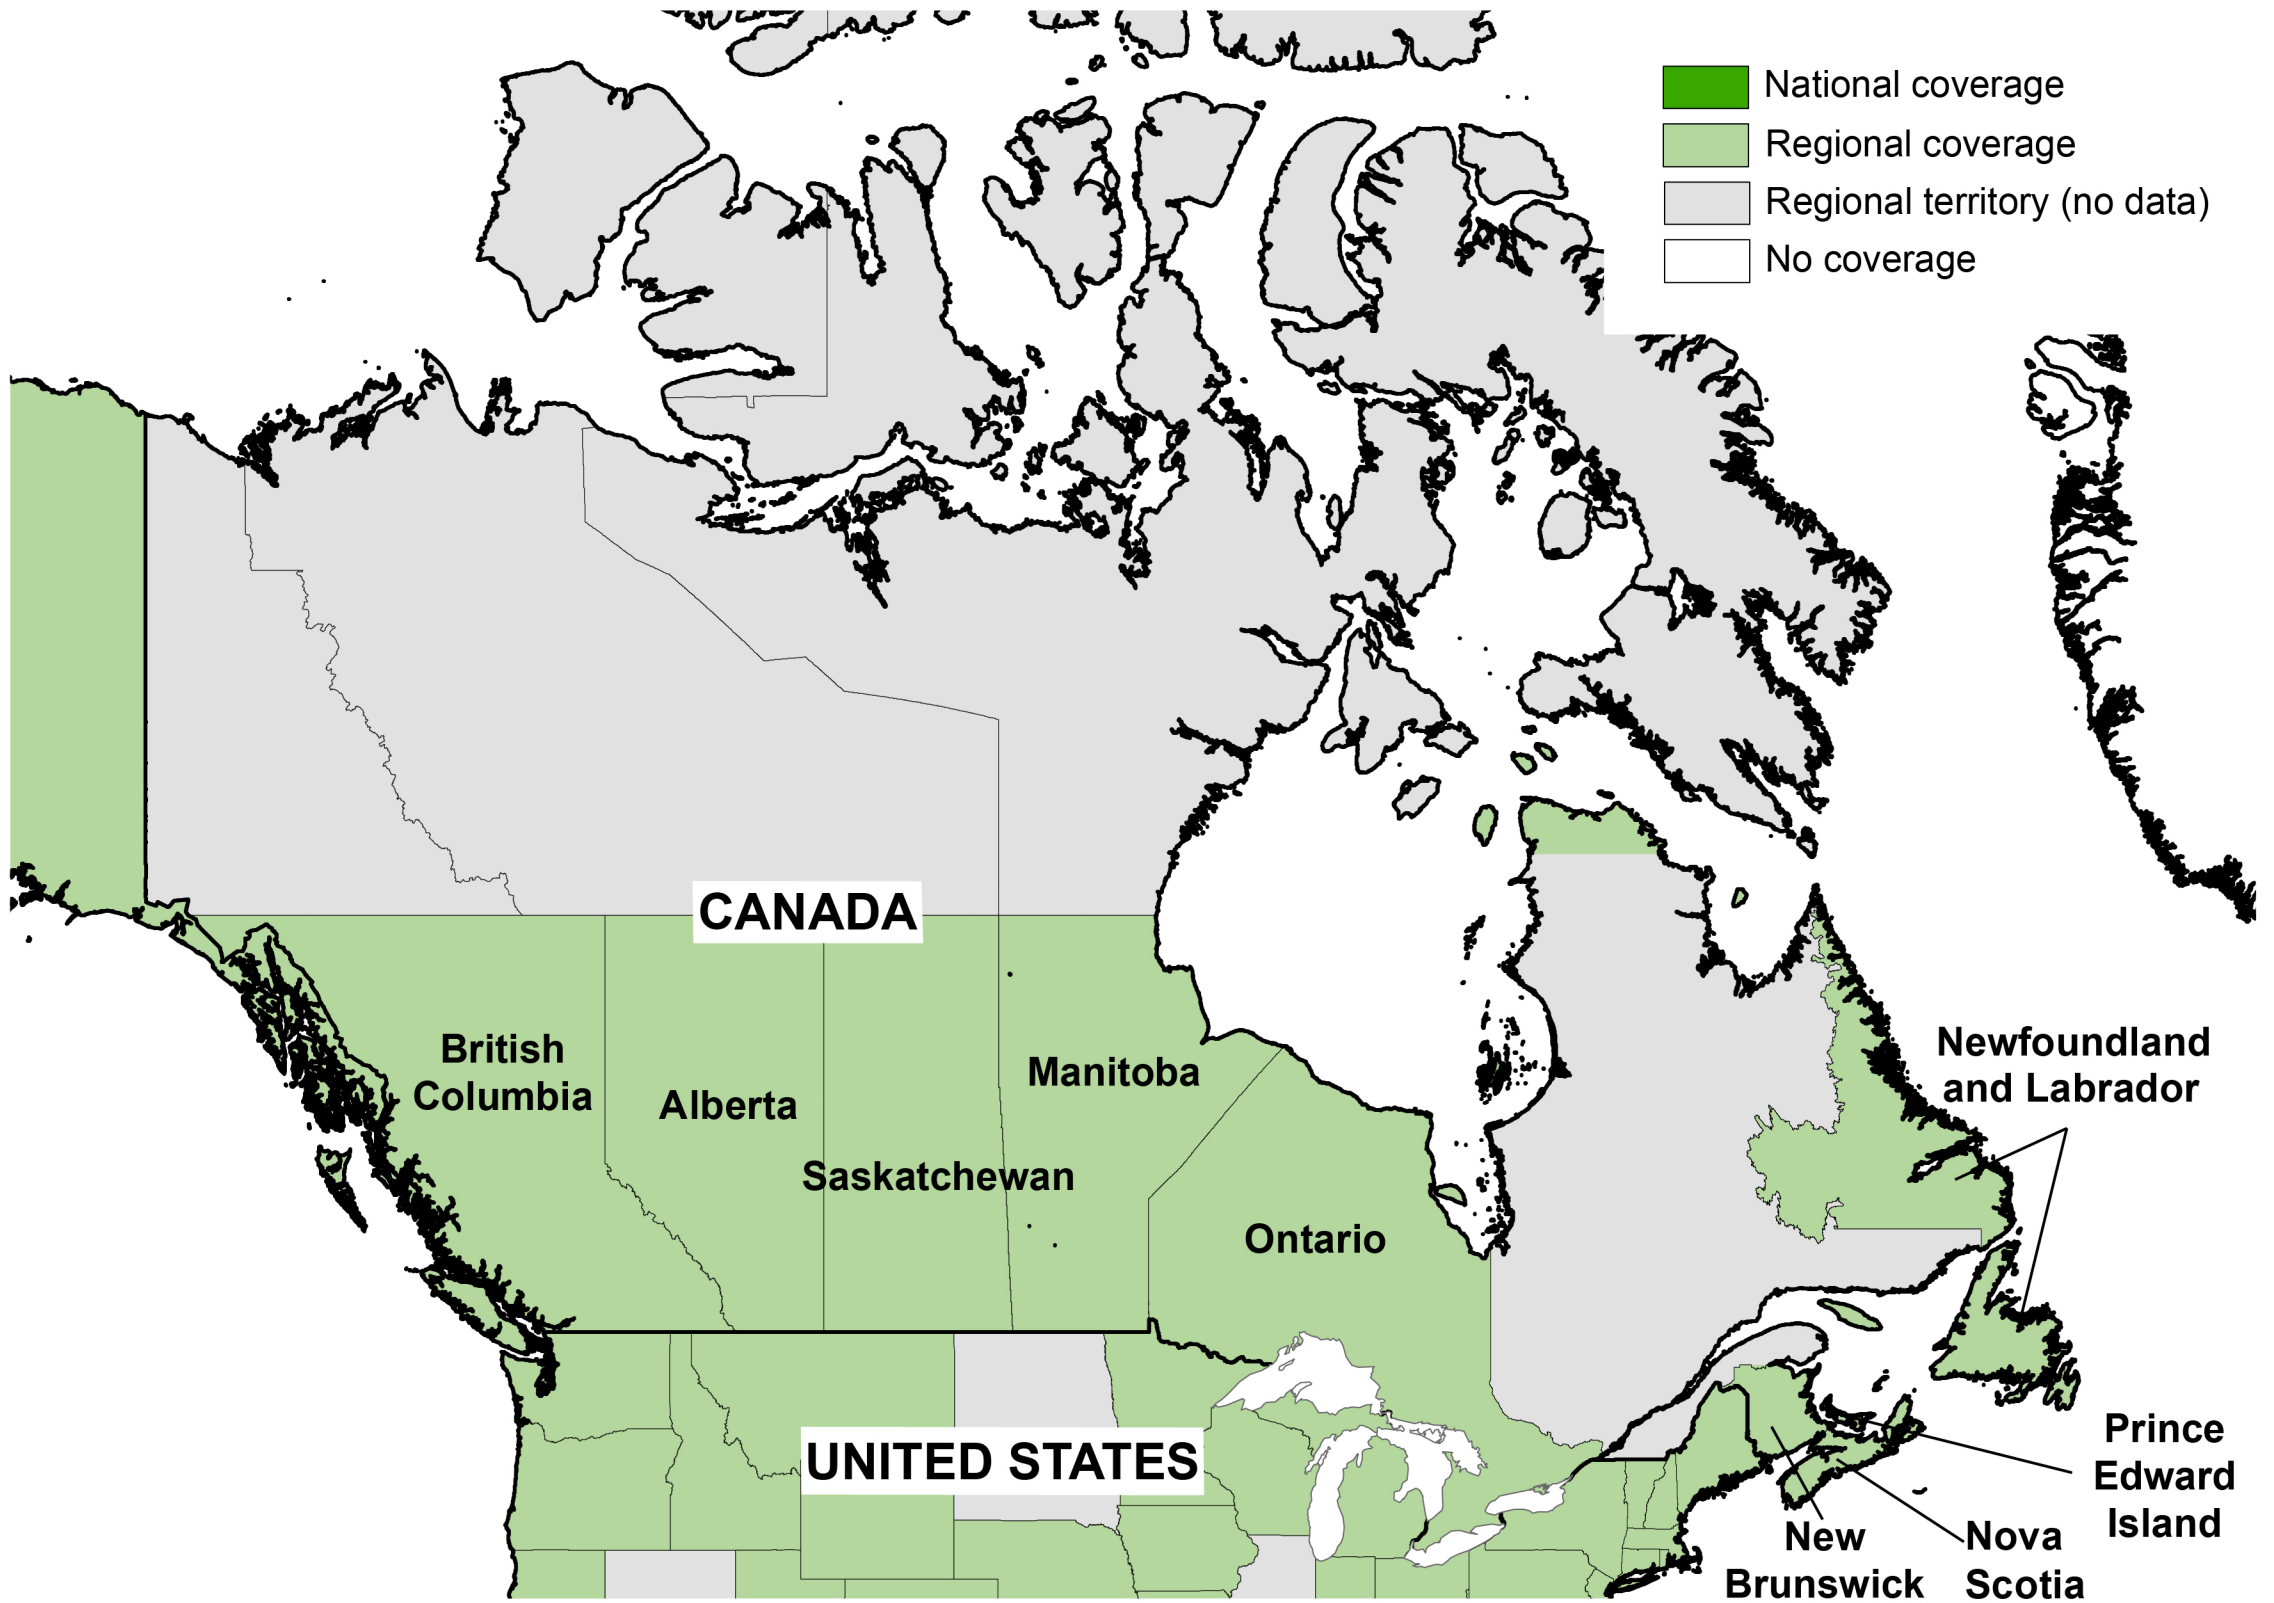

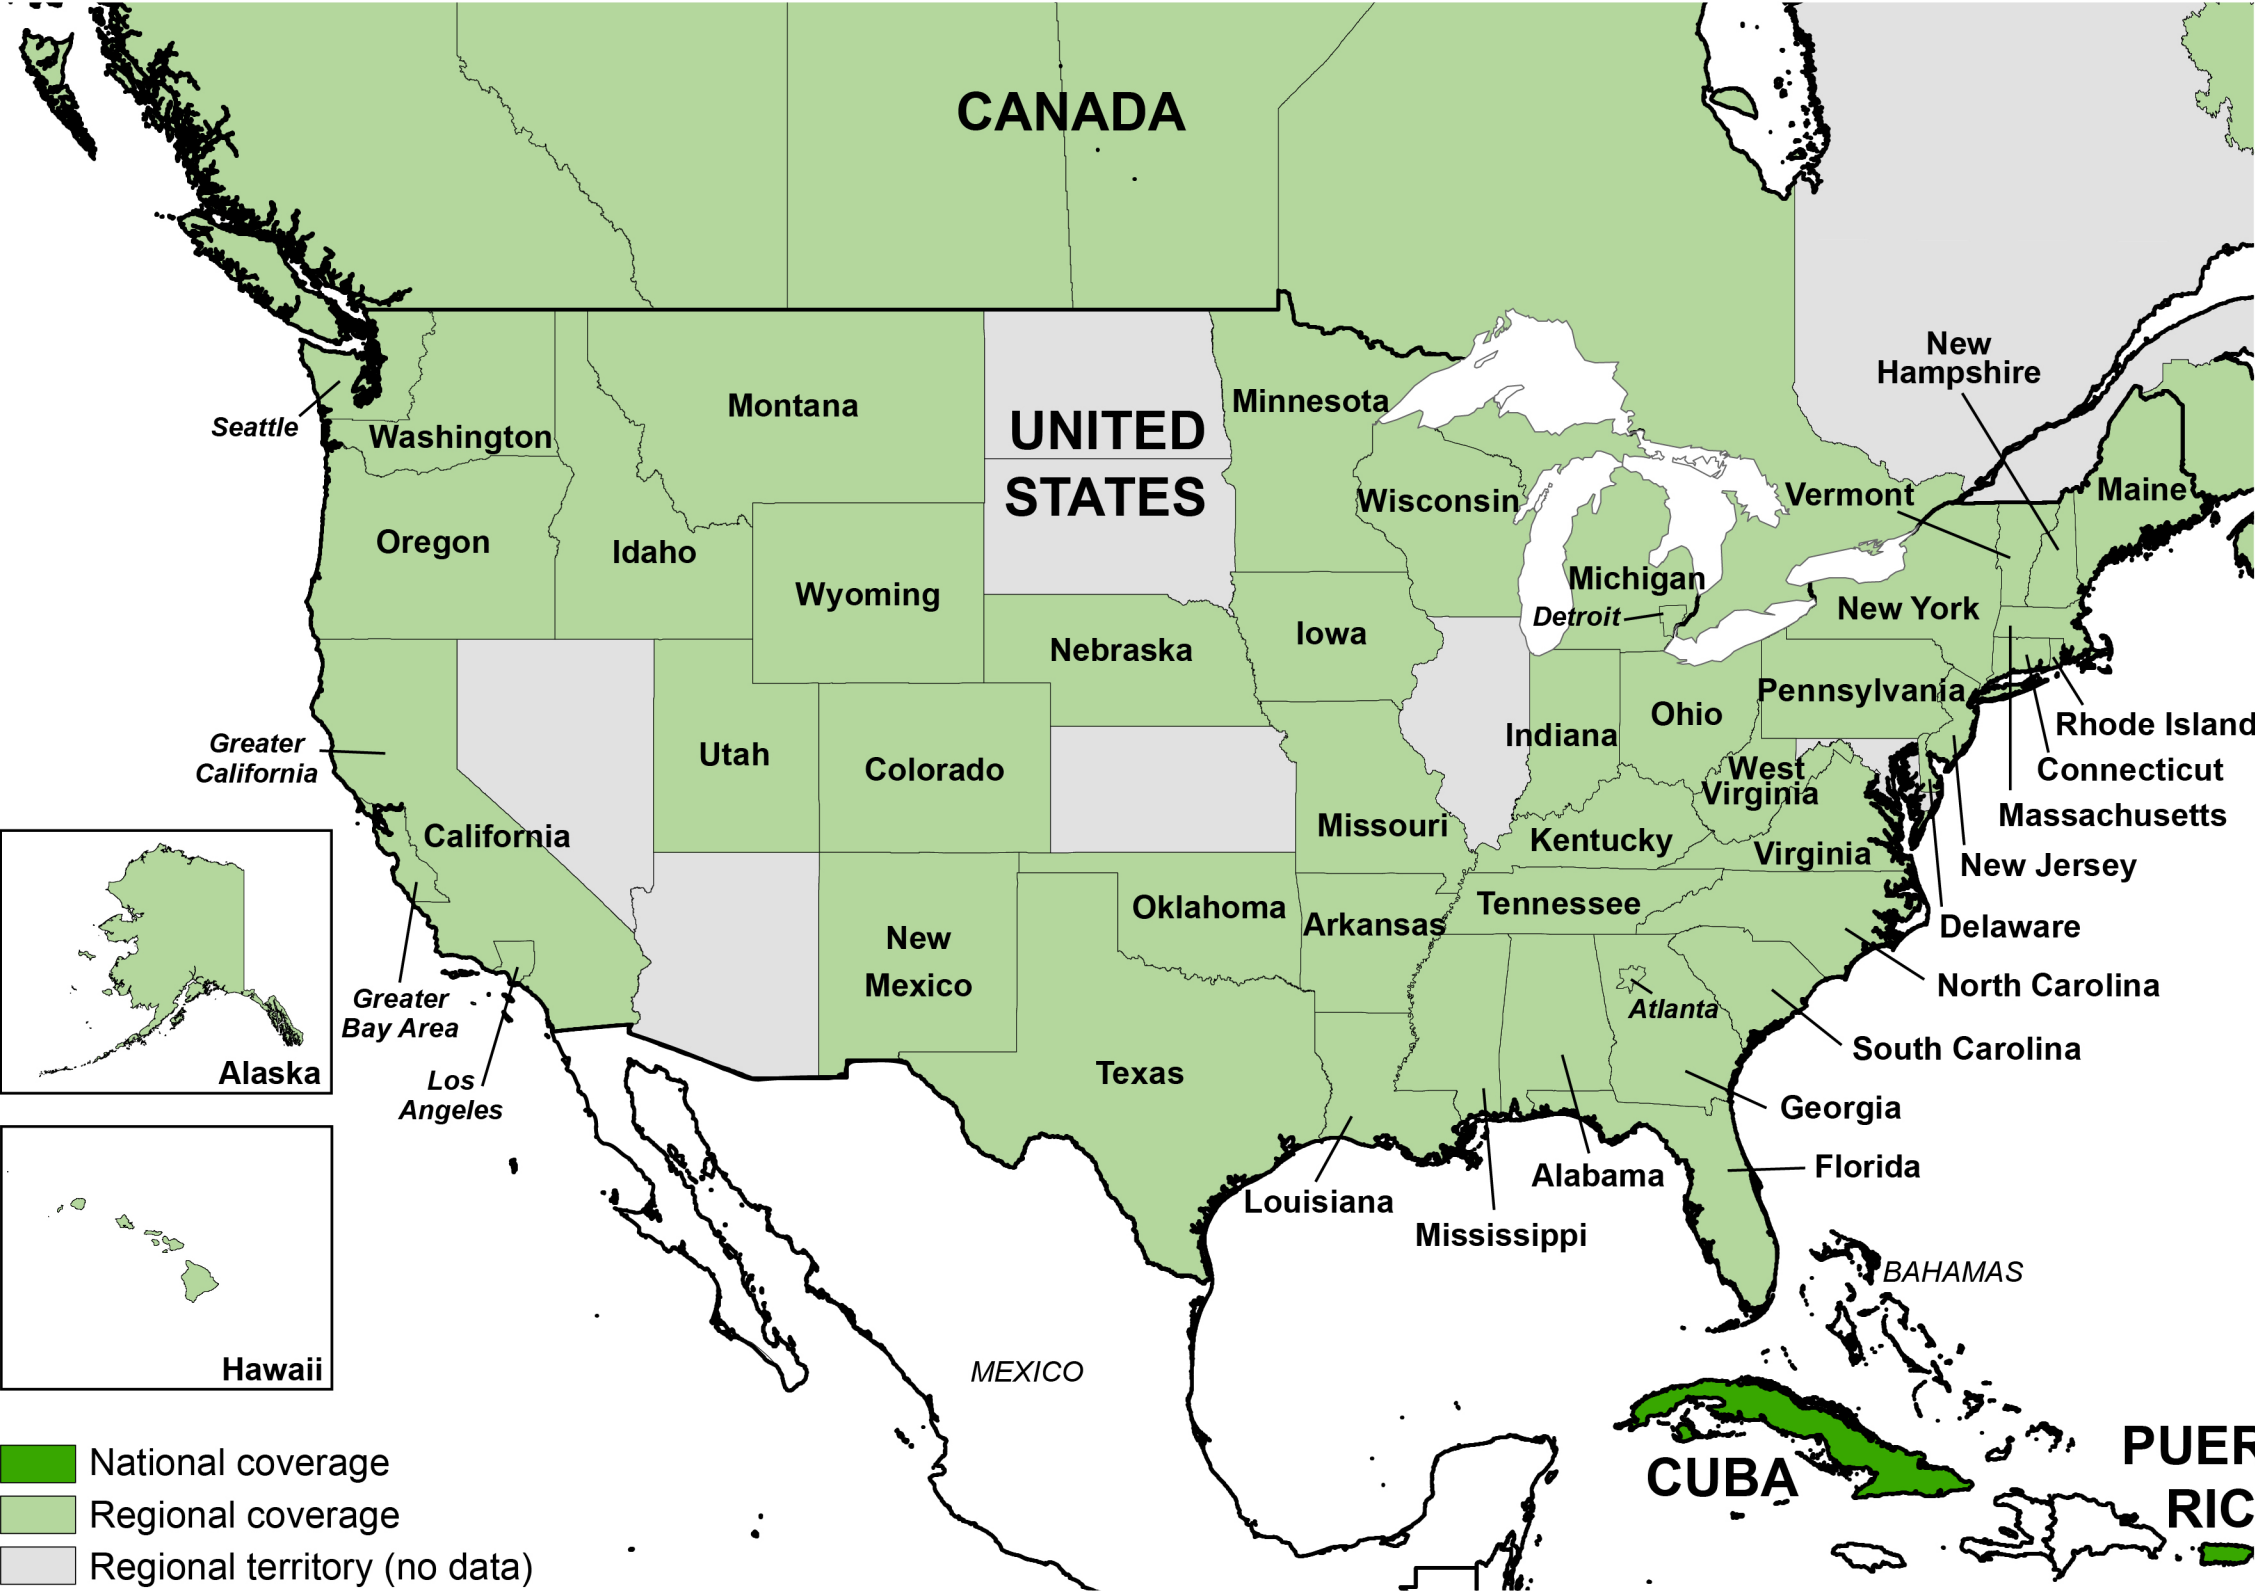

- National coverage
- Regional coverage
- Regional territory (no data)
- No coverage

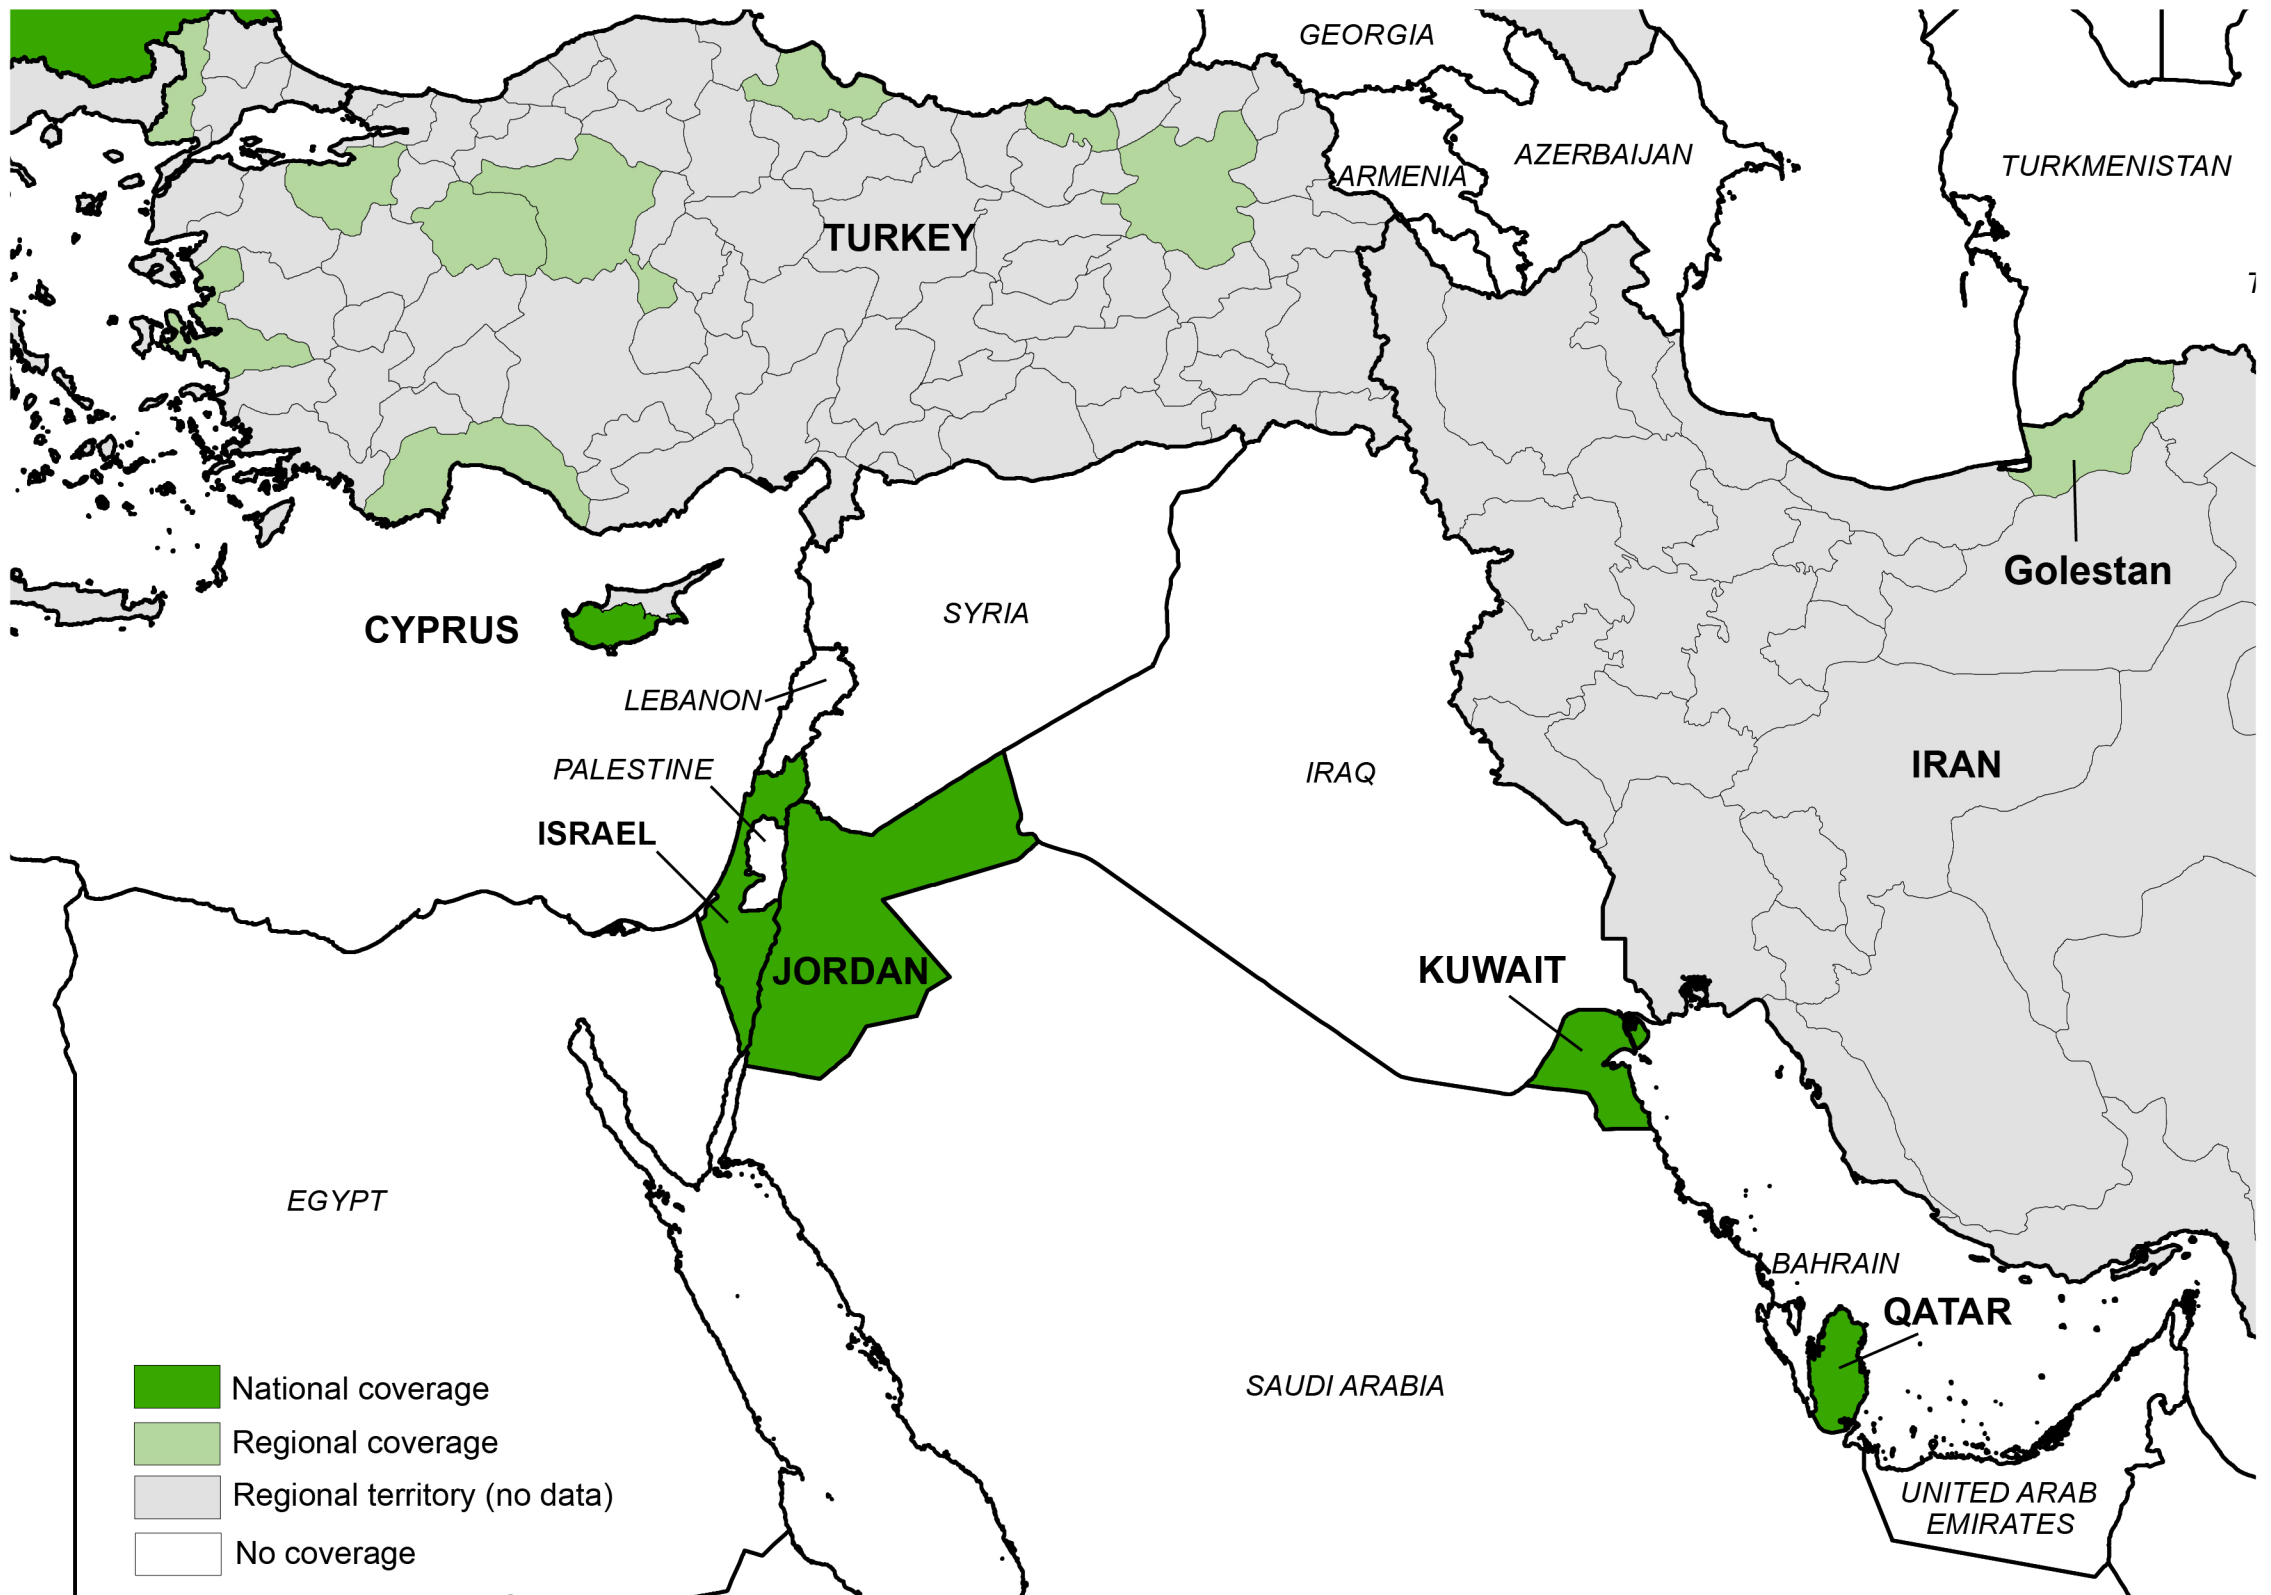

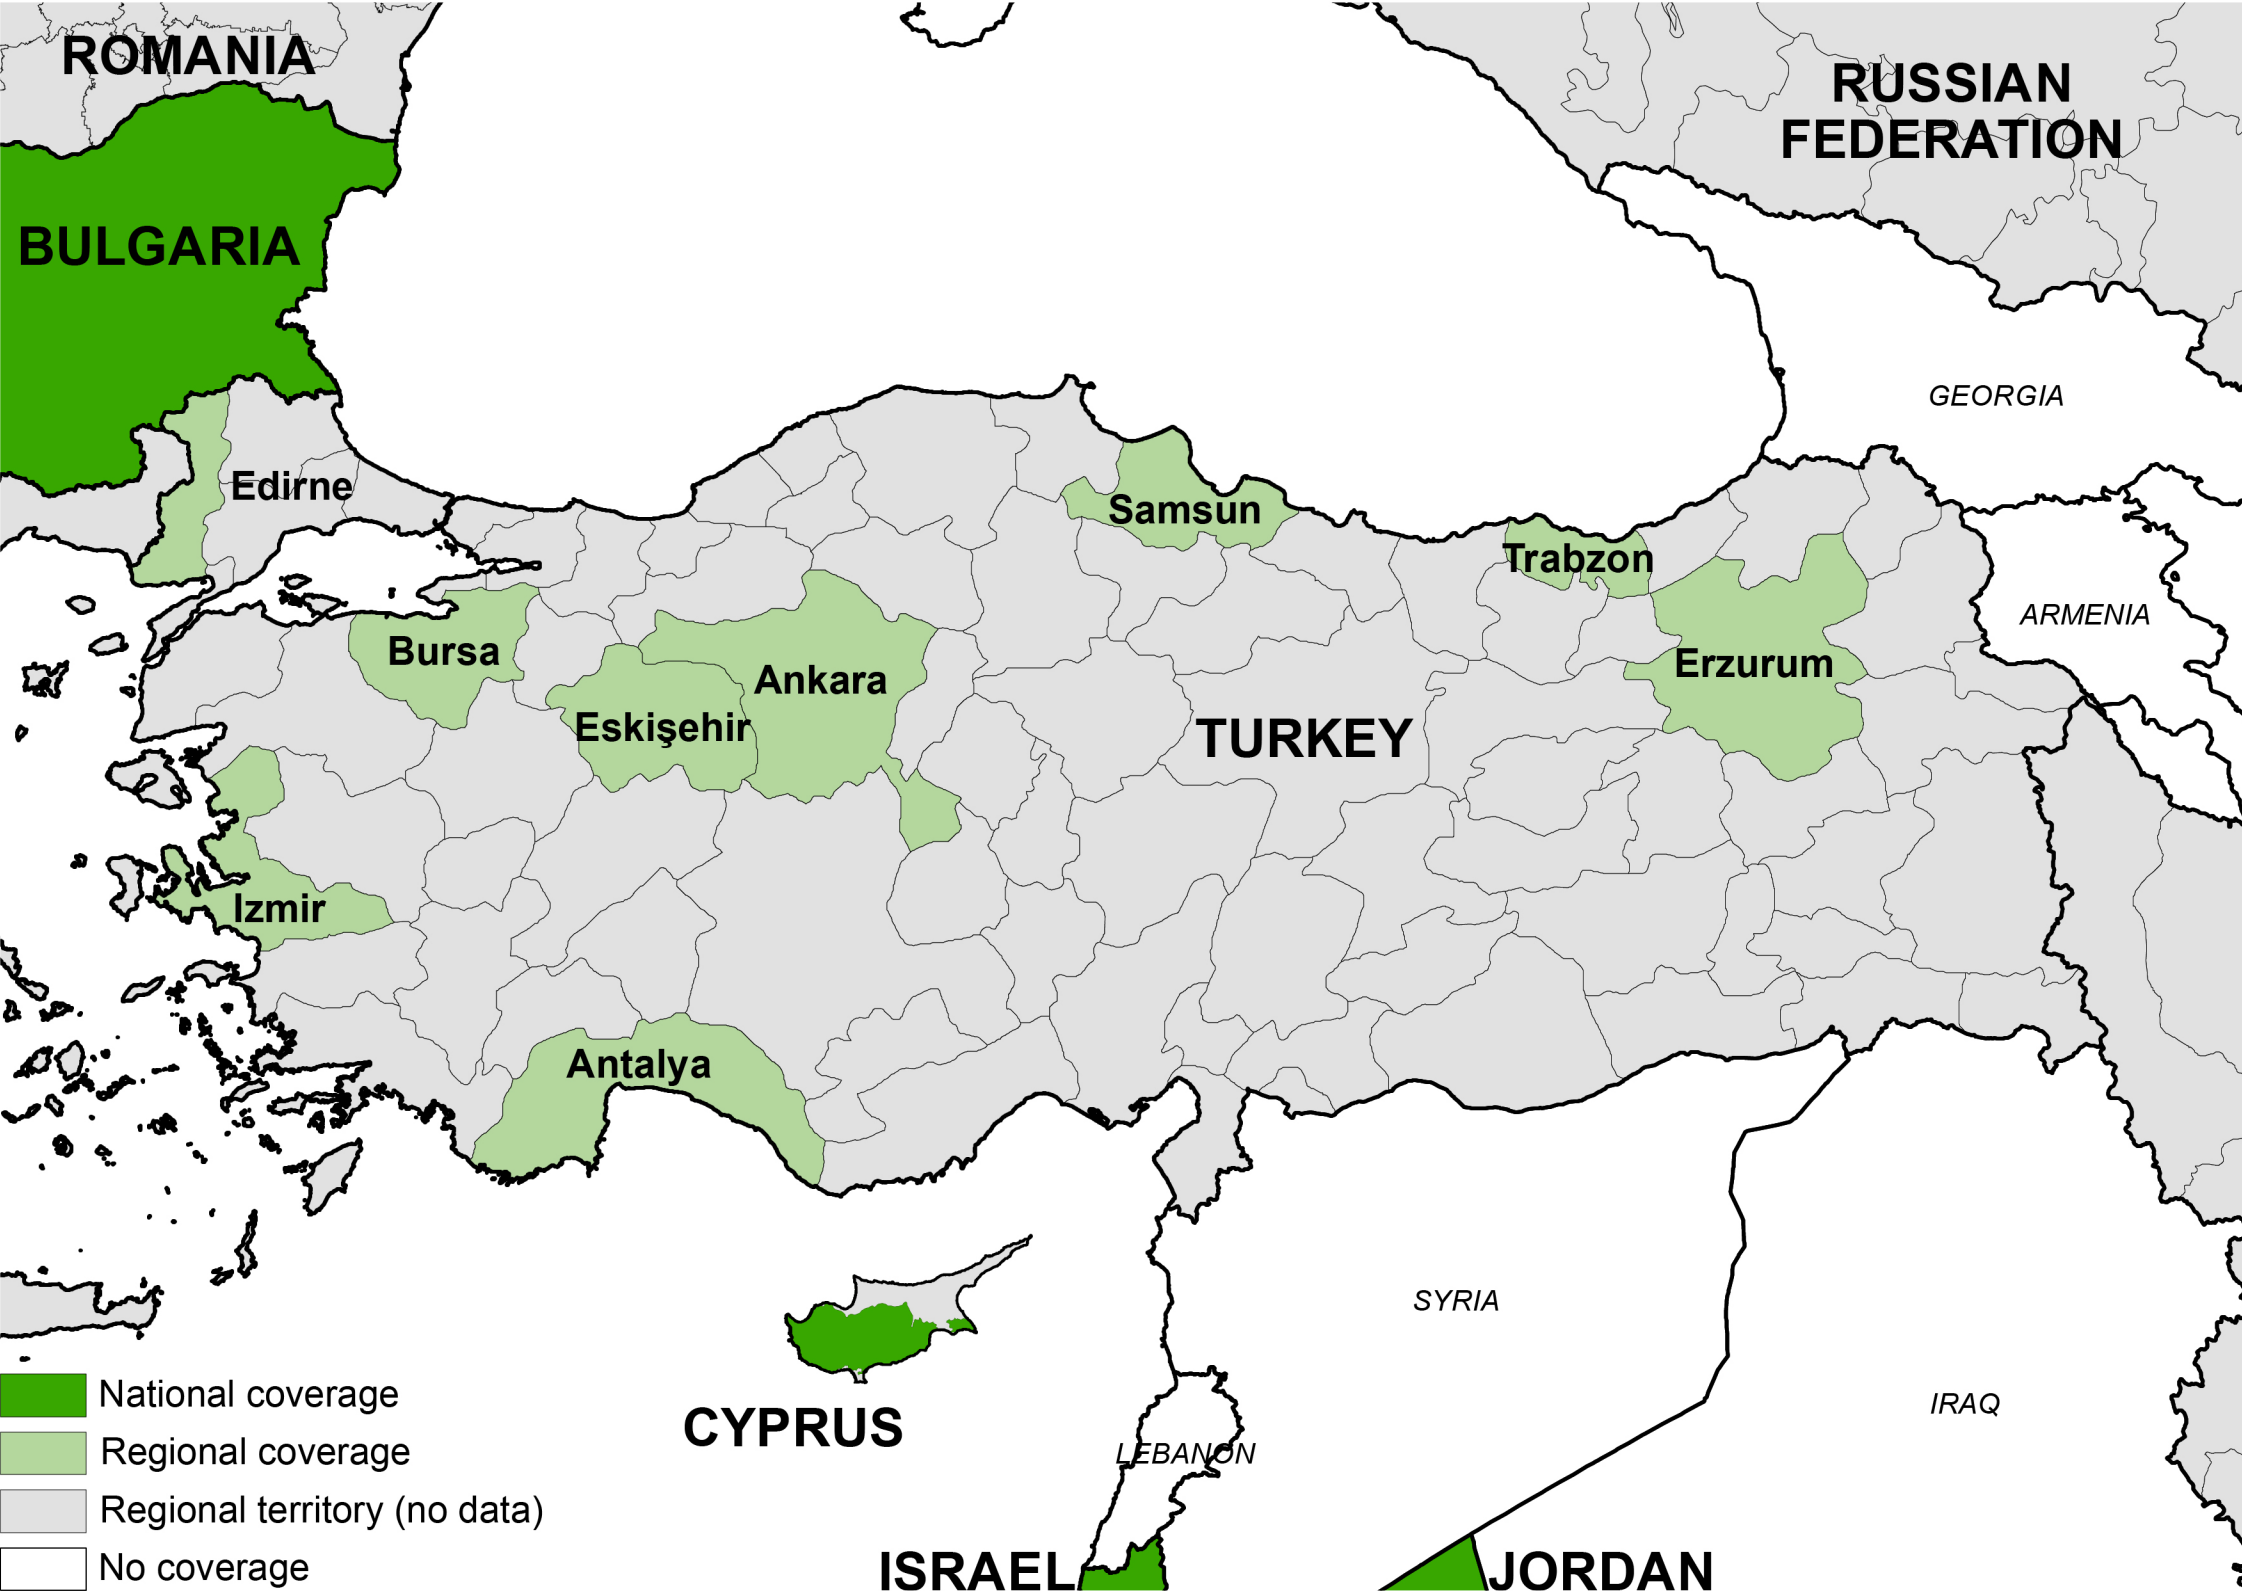

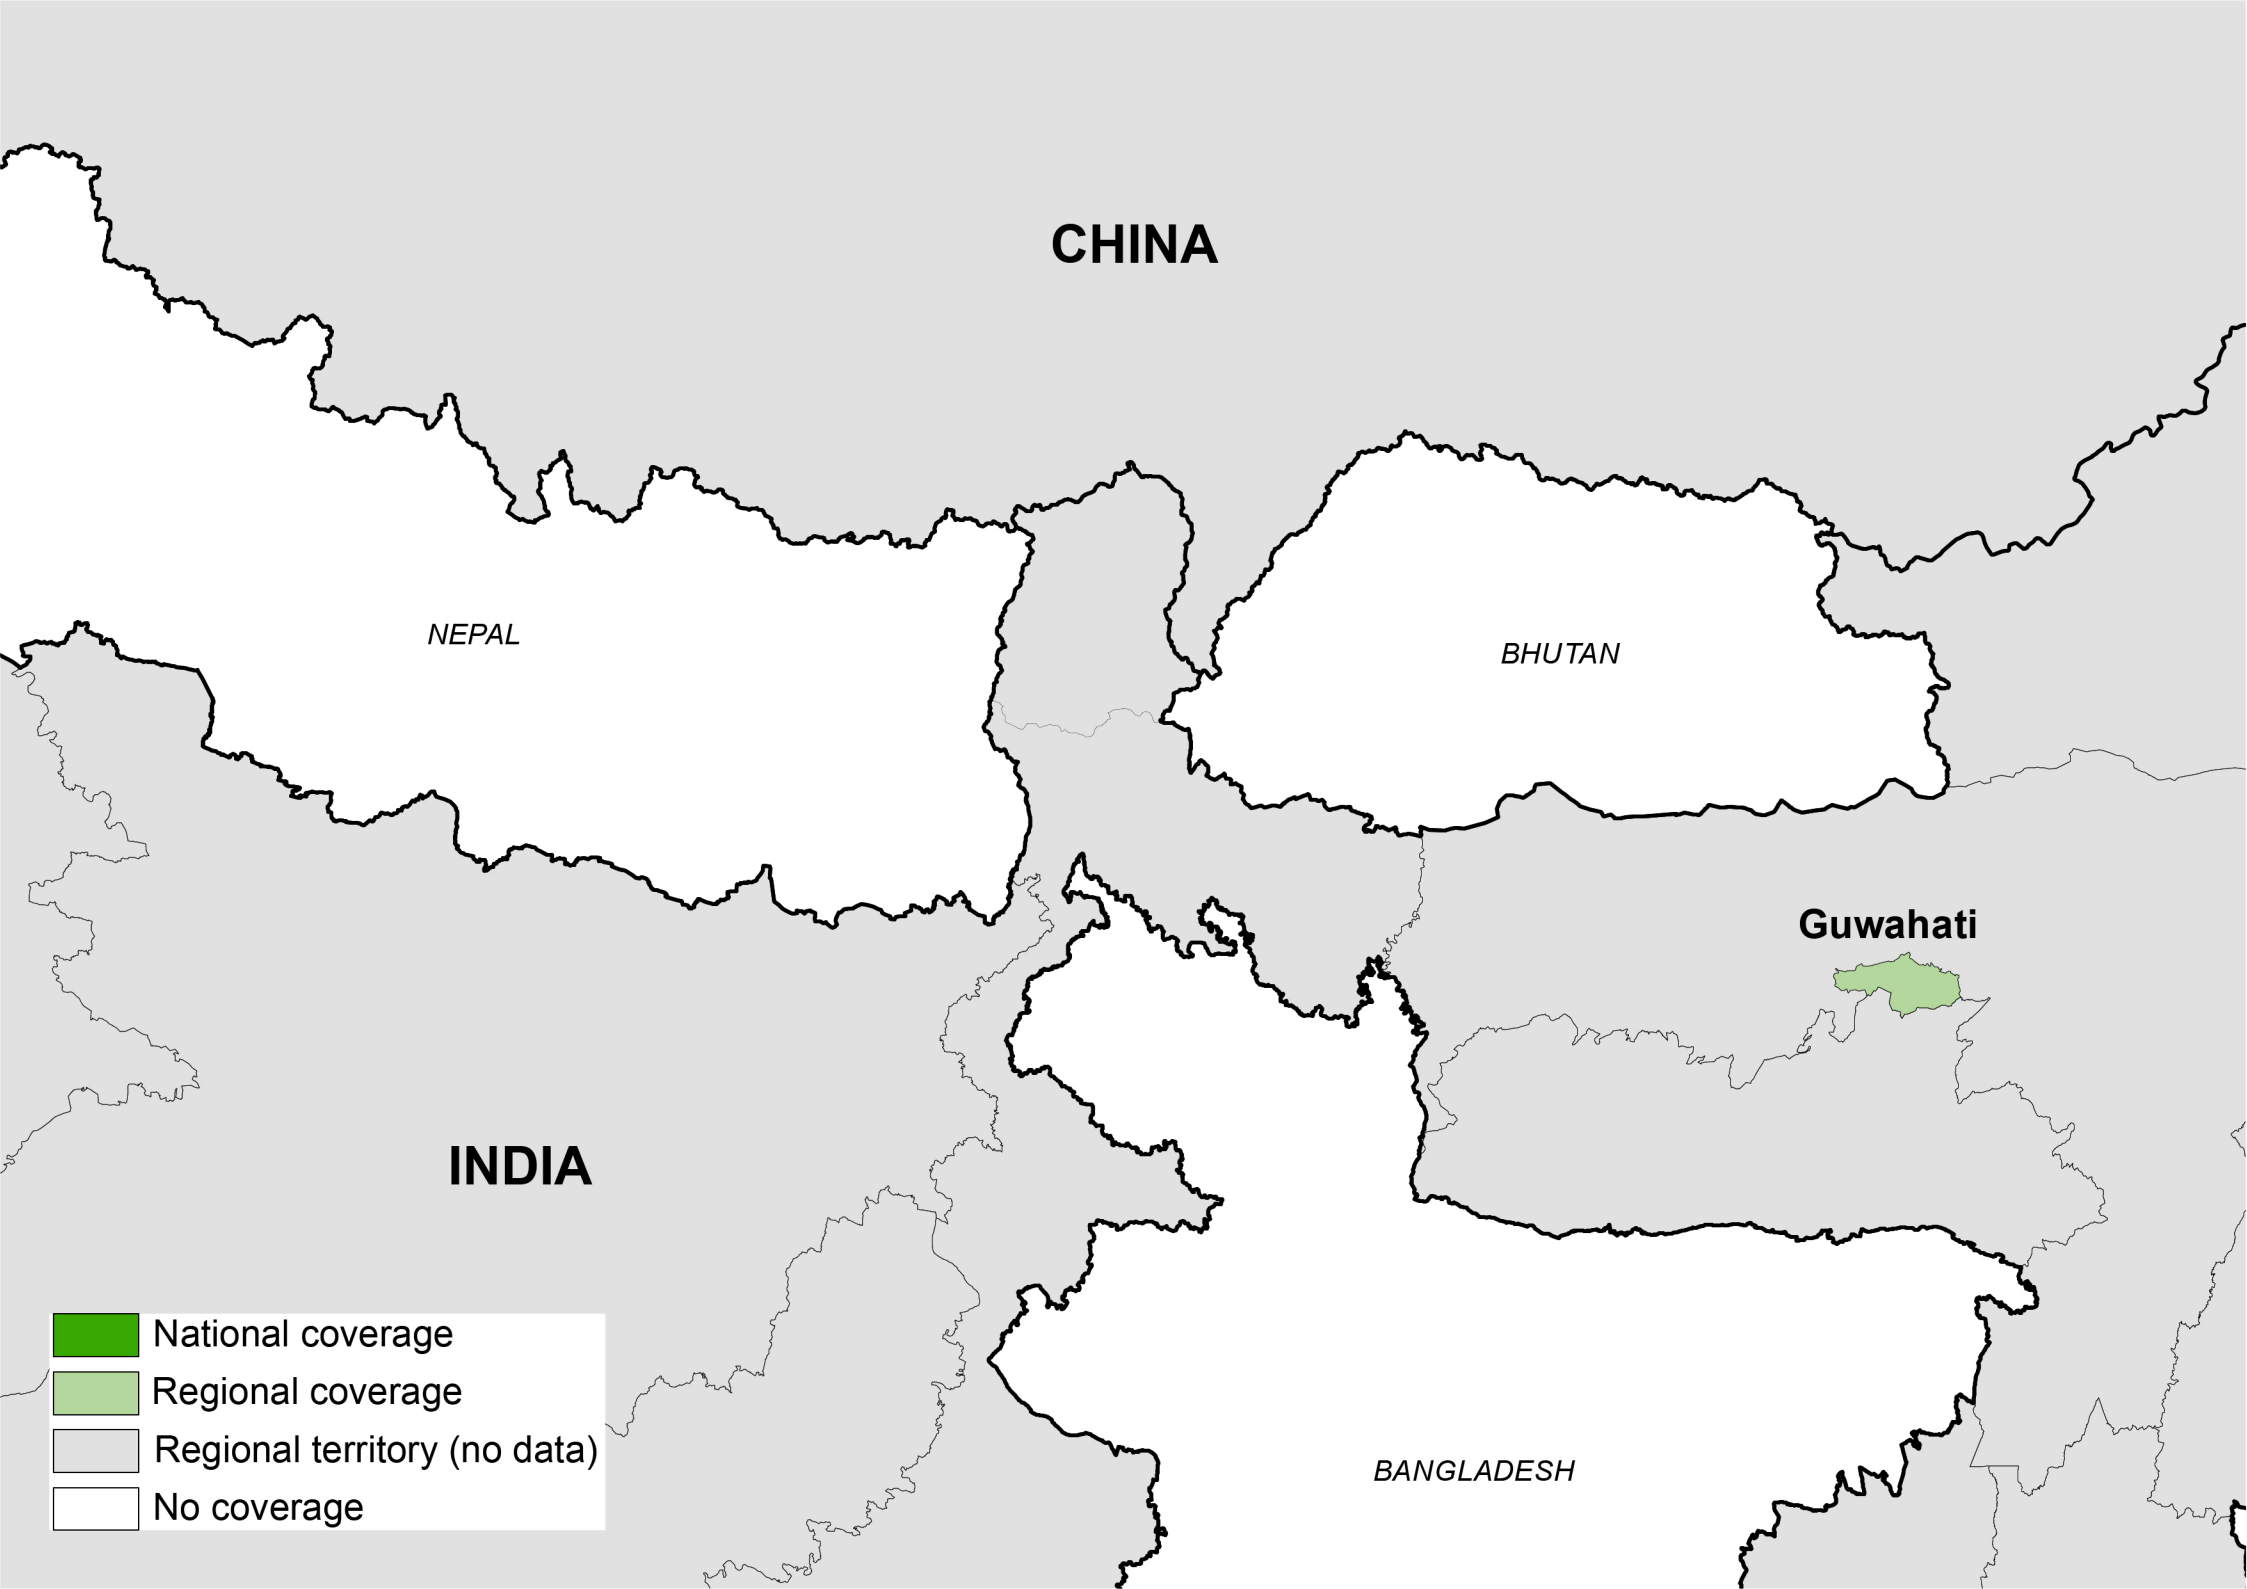

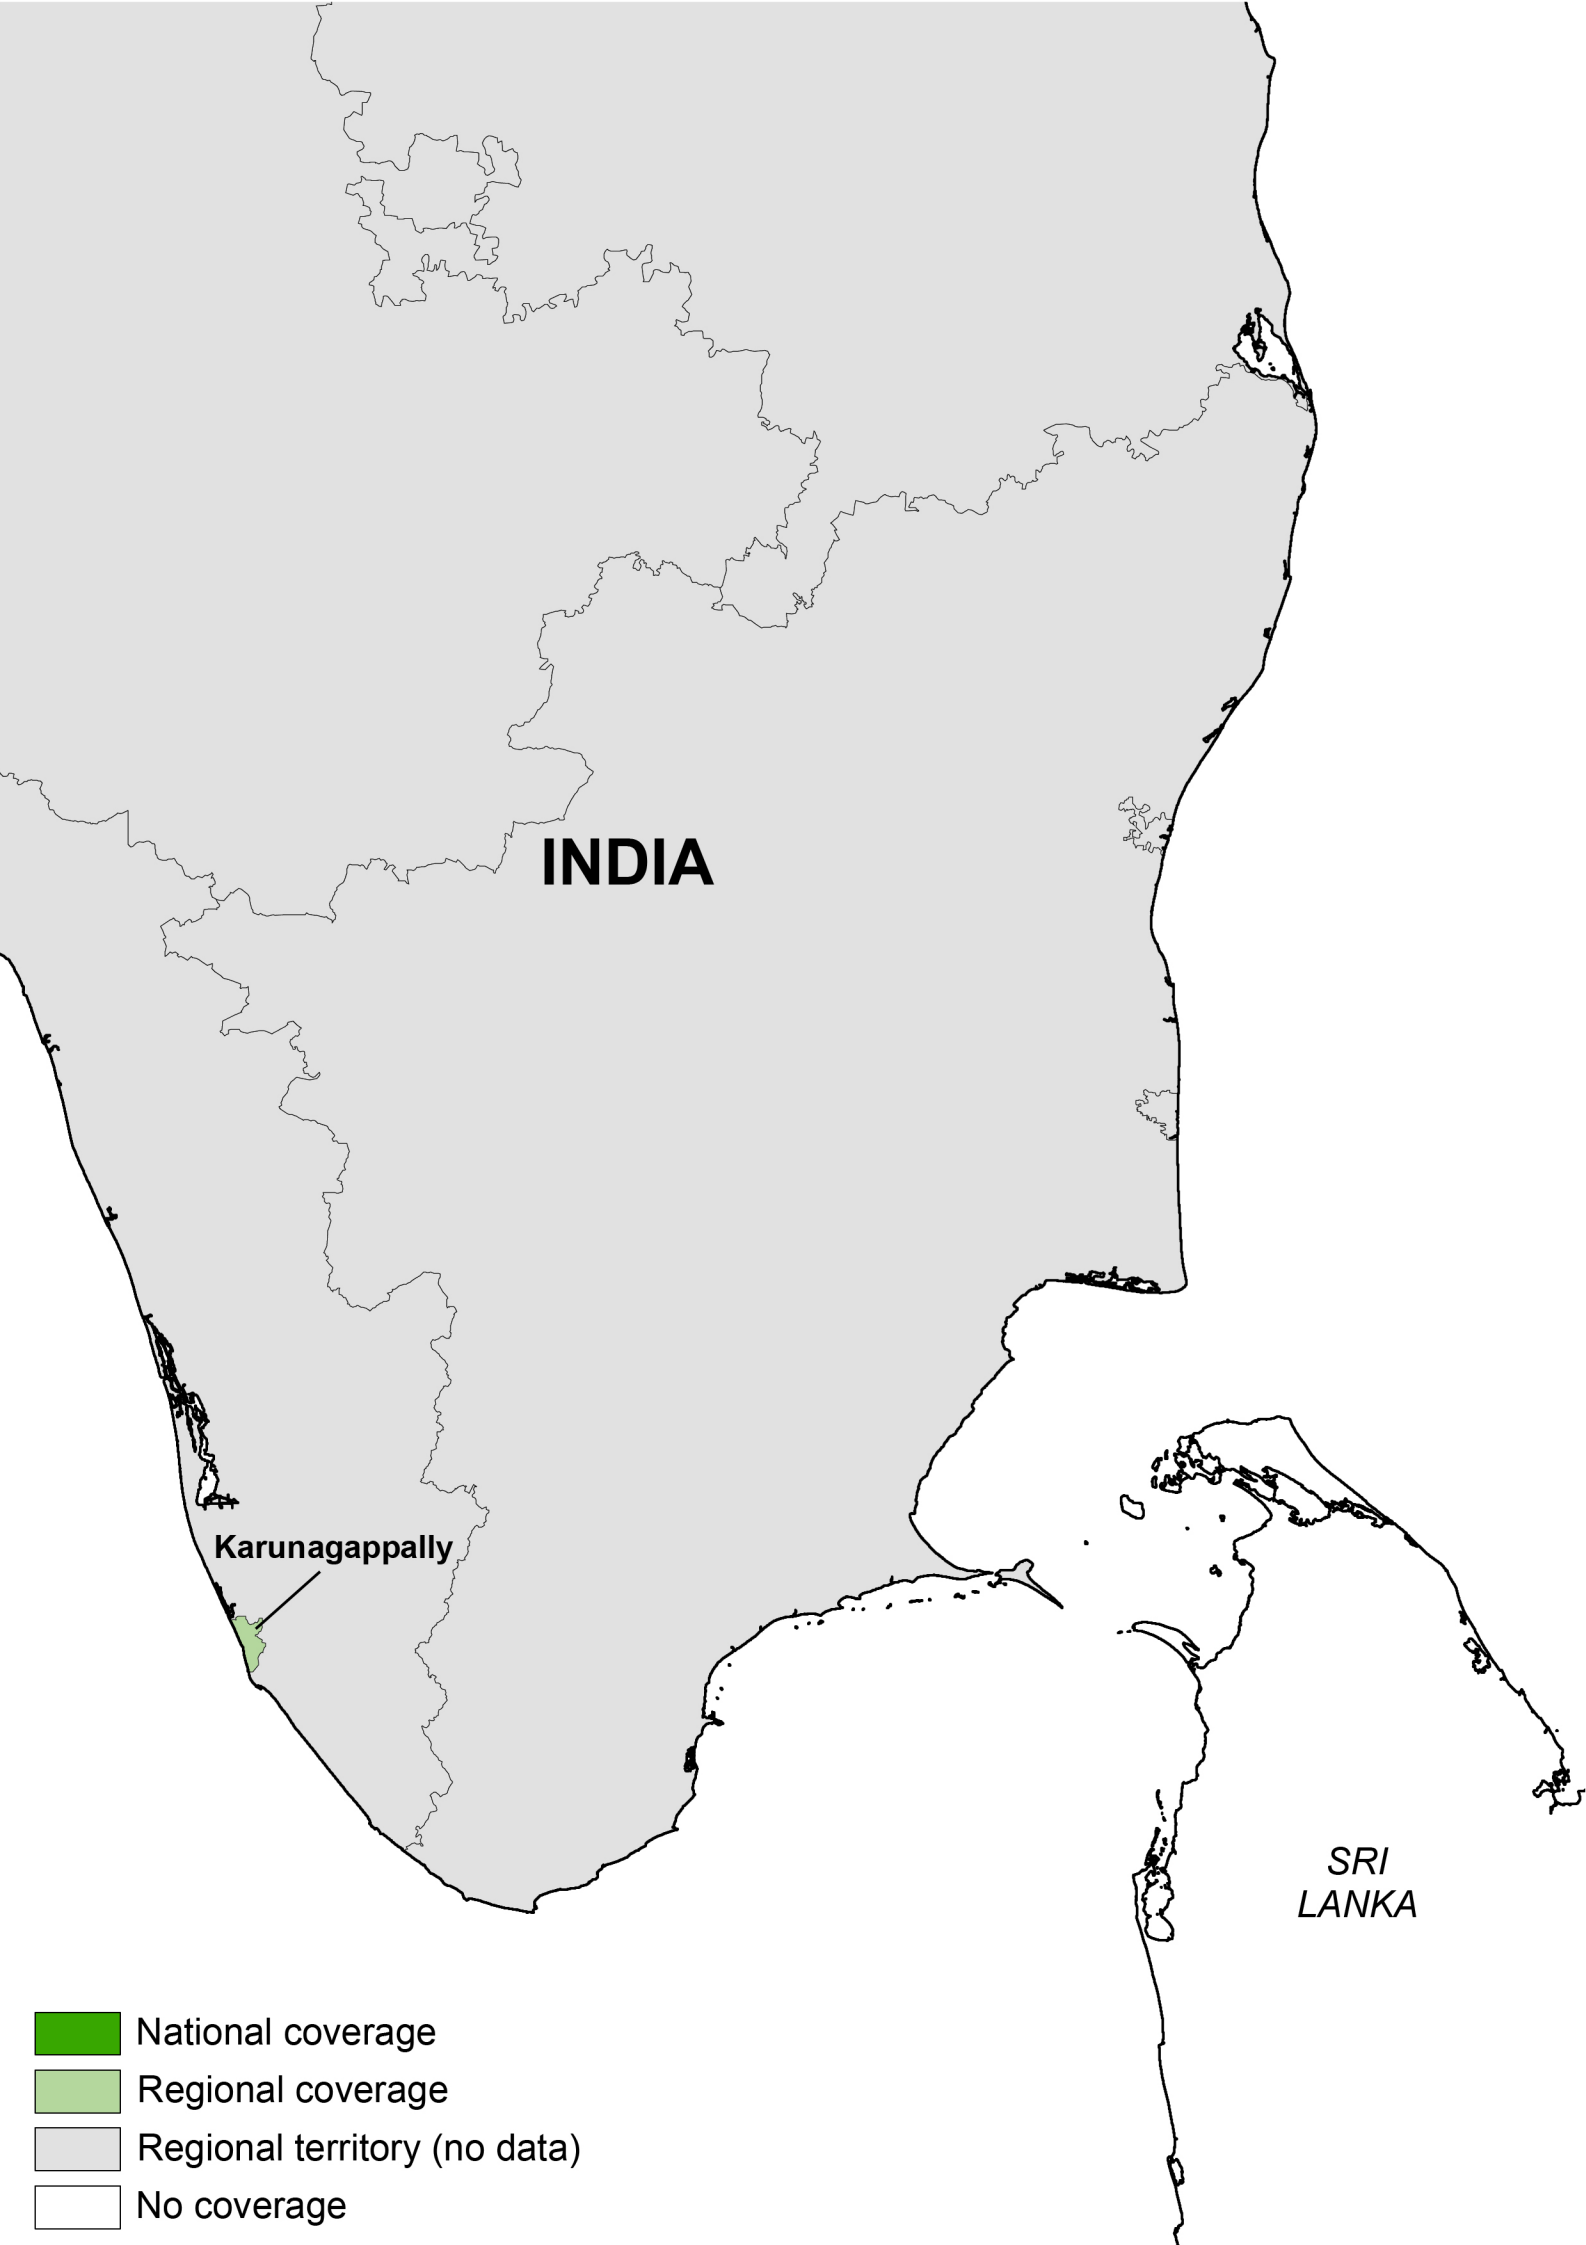

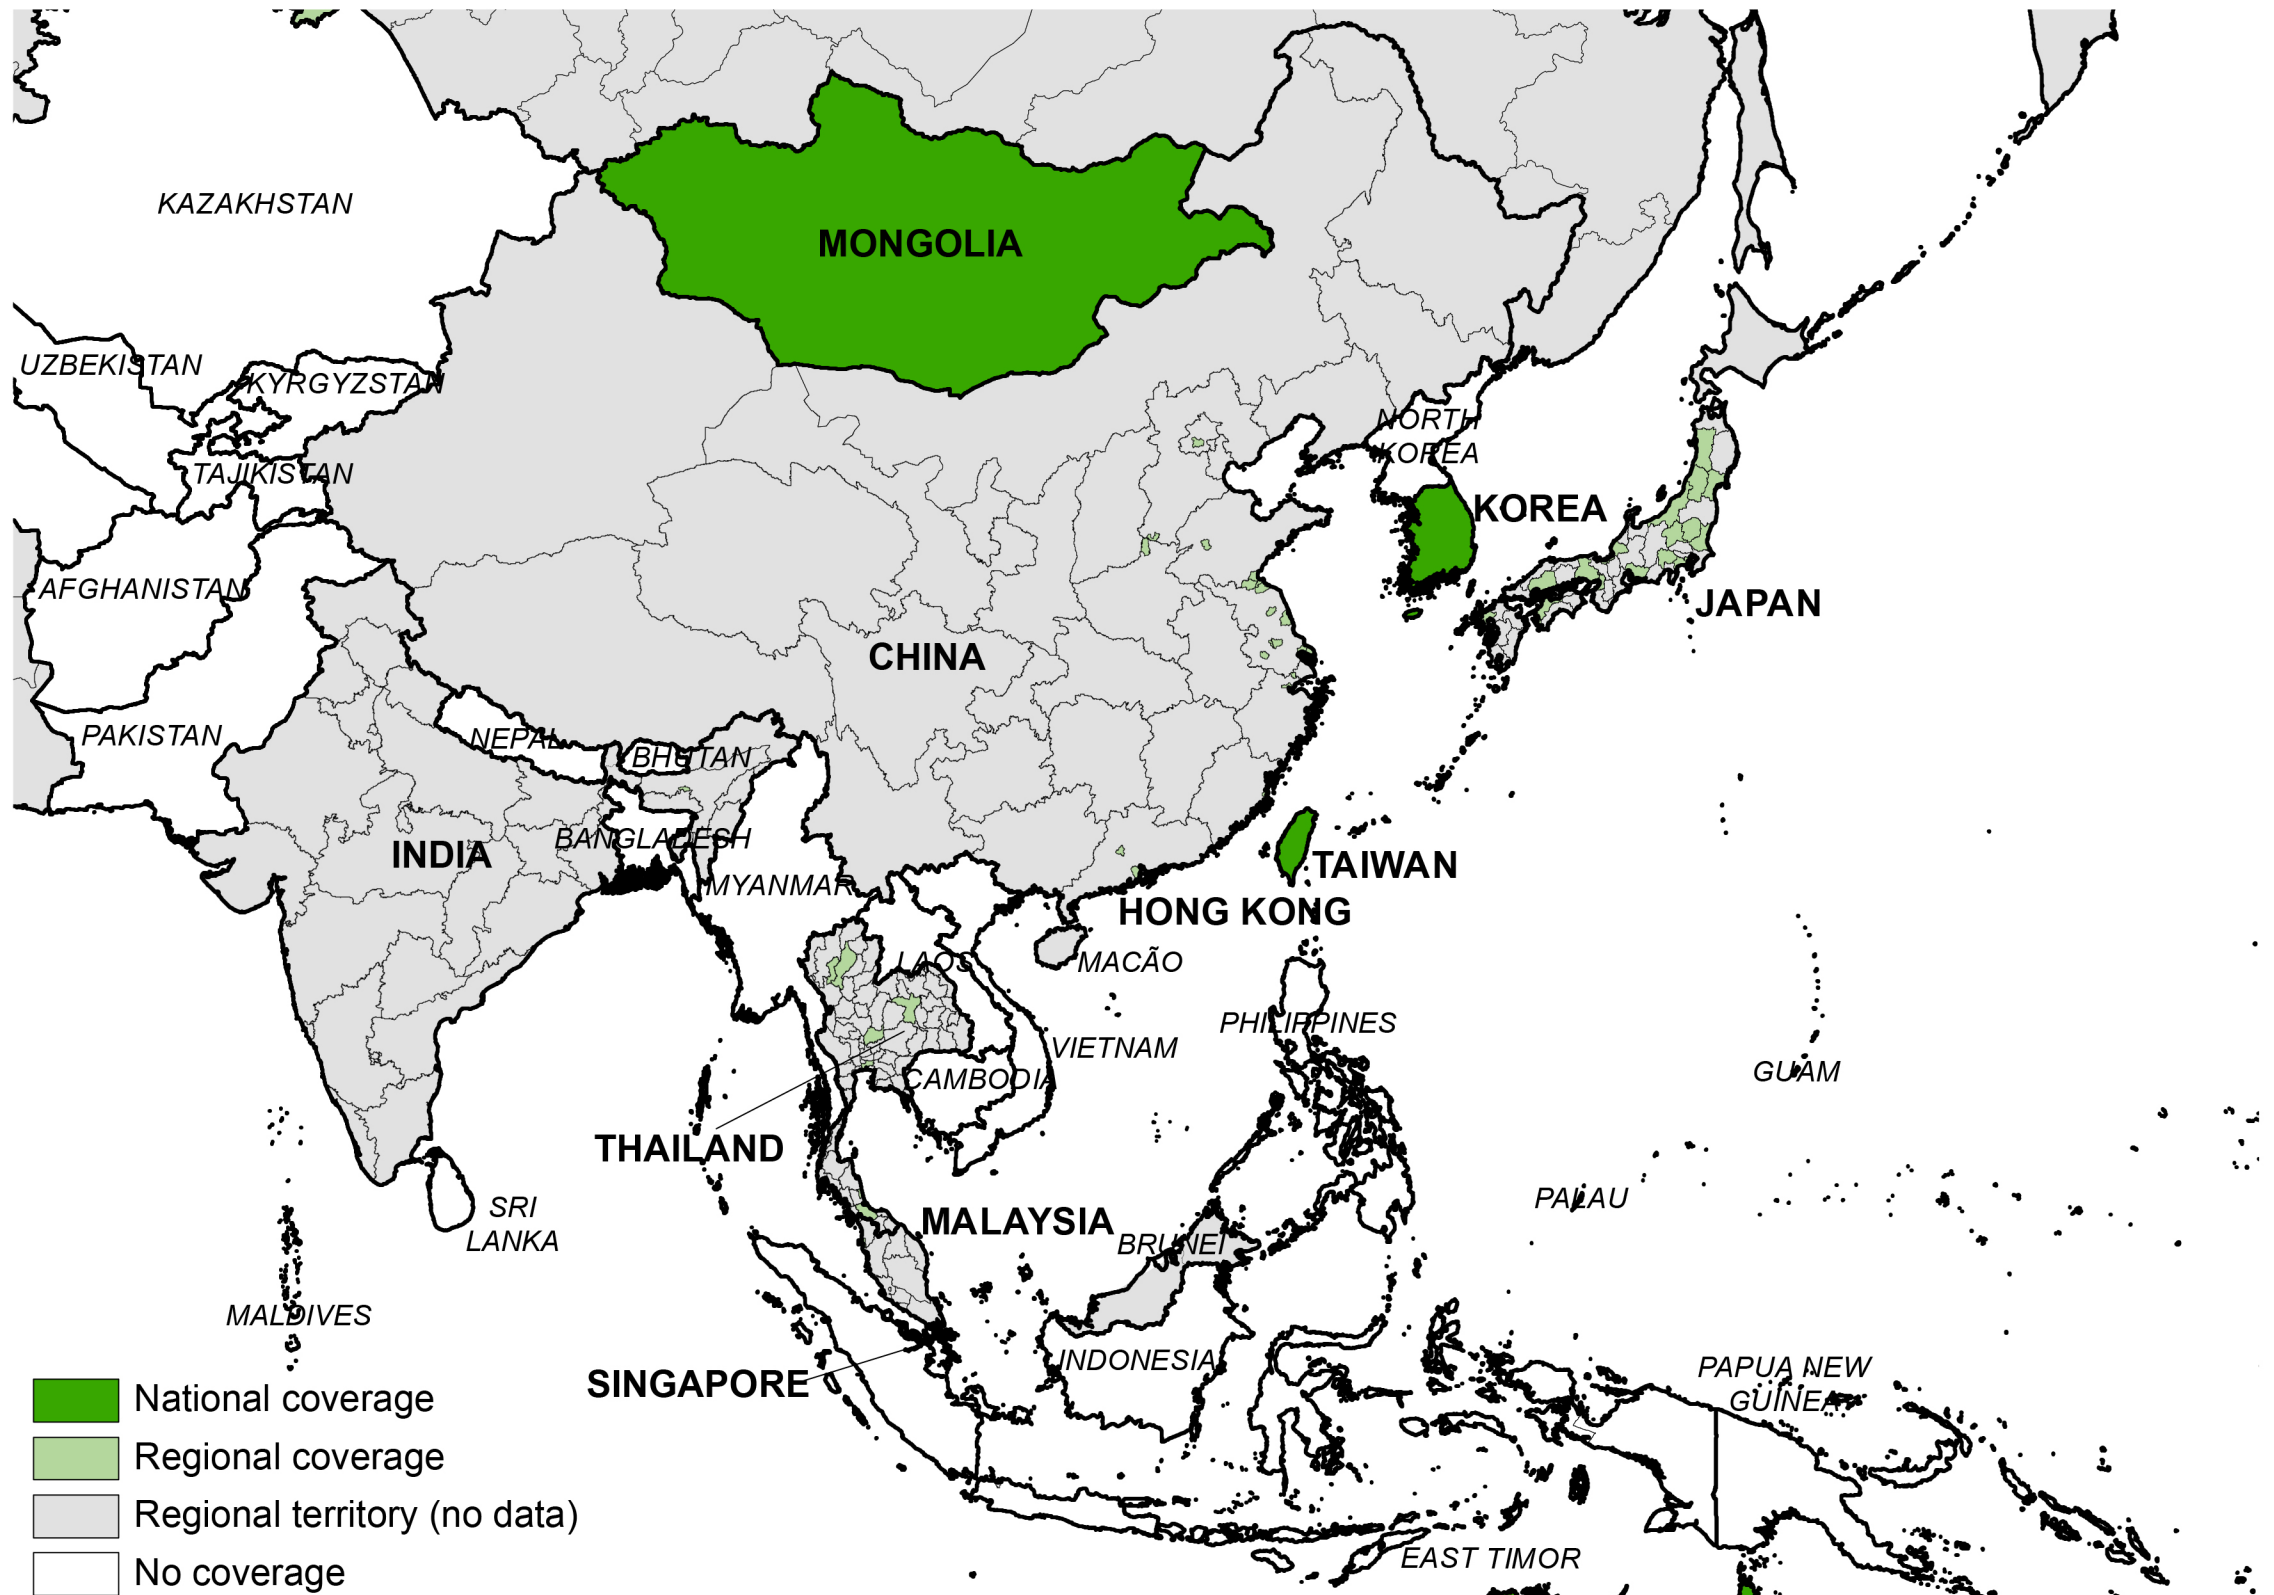

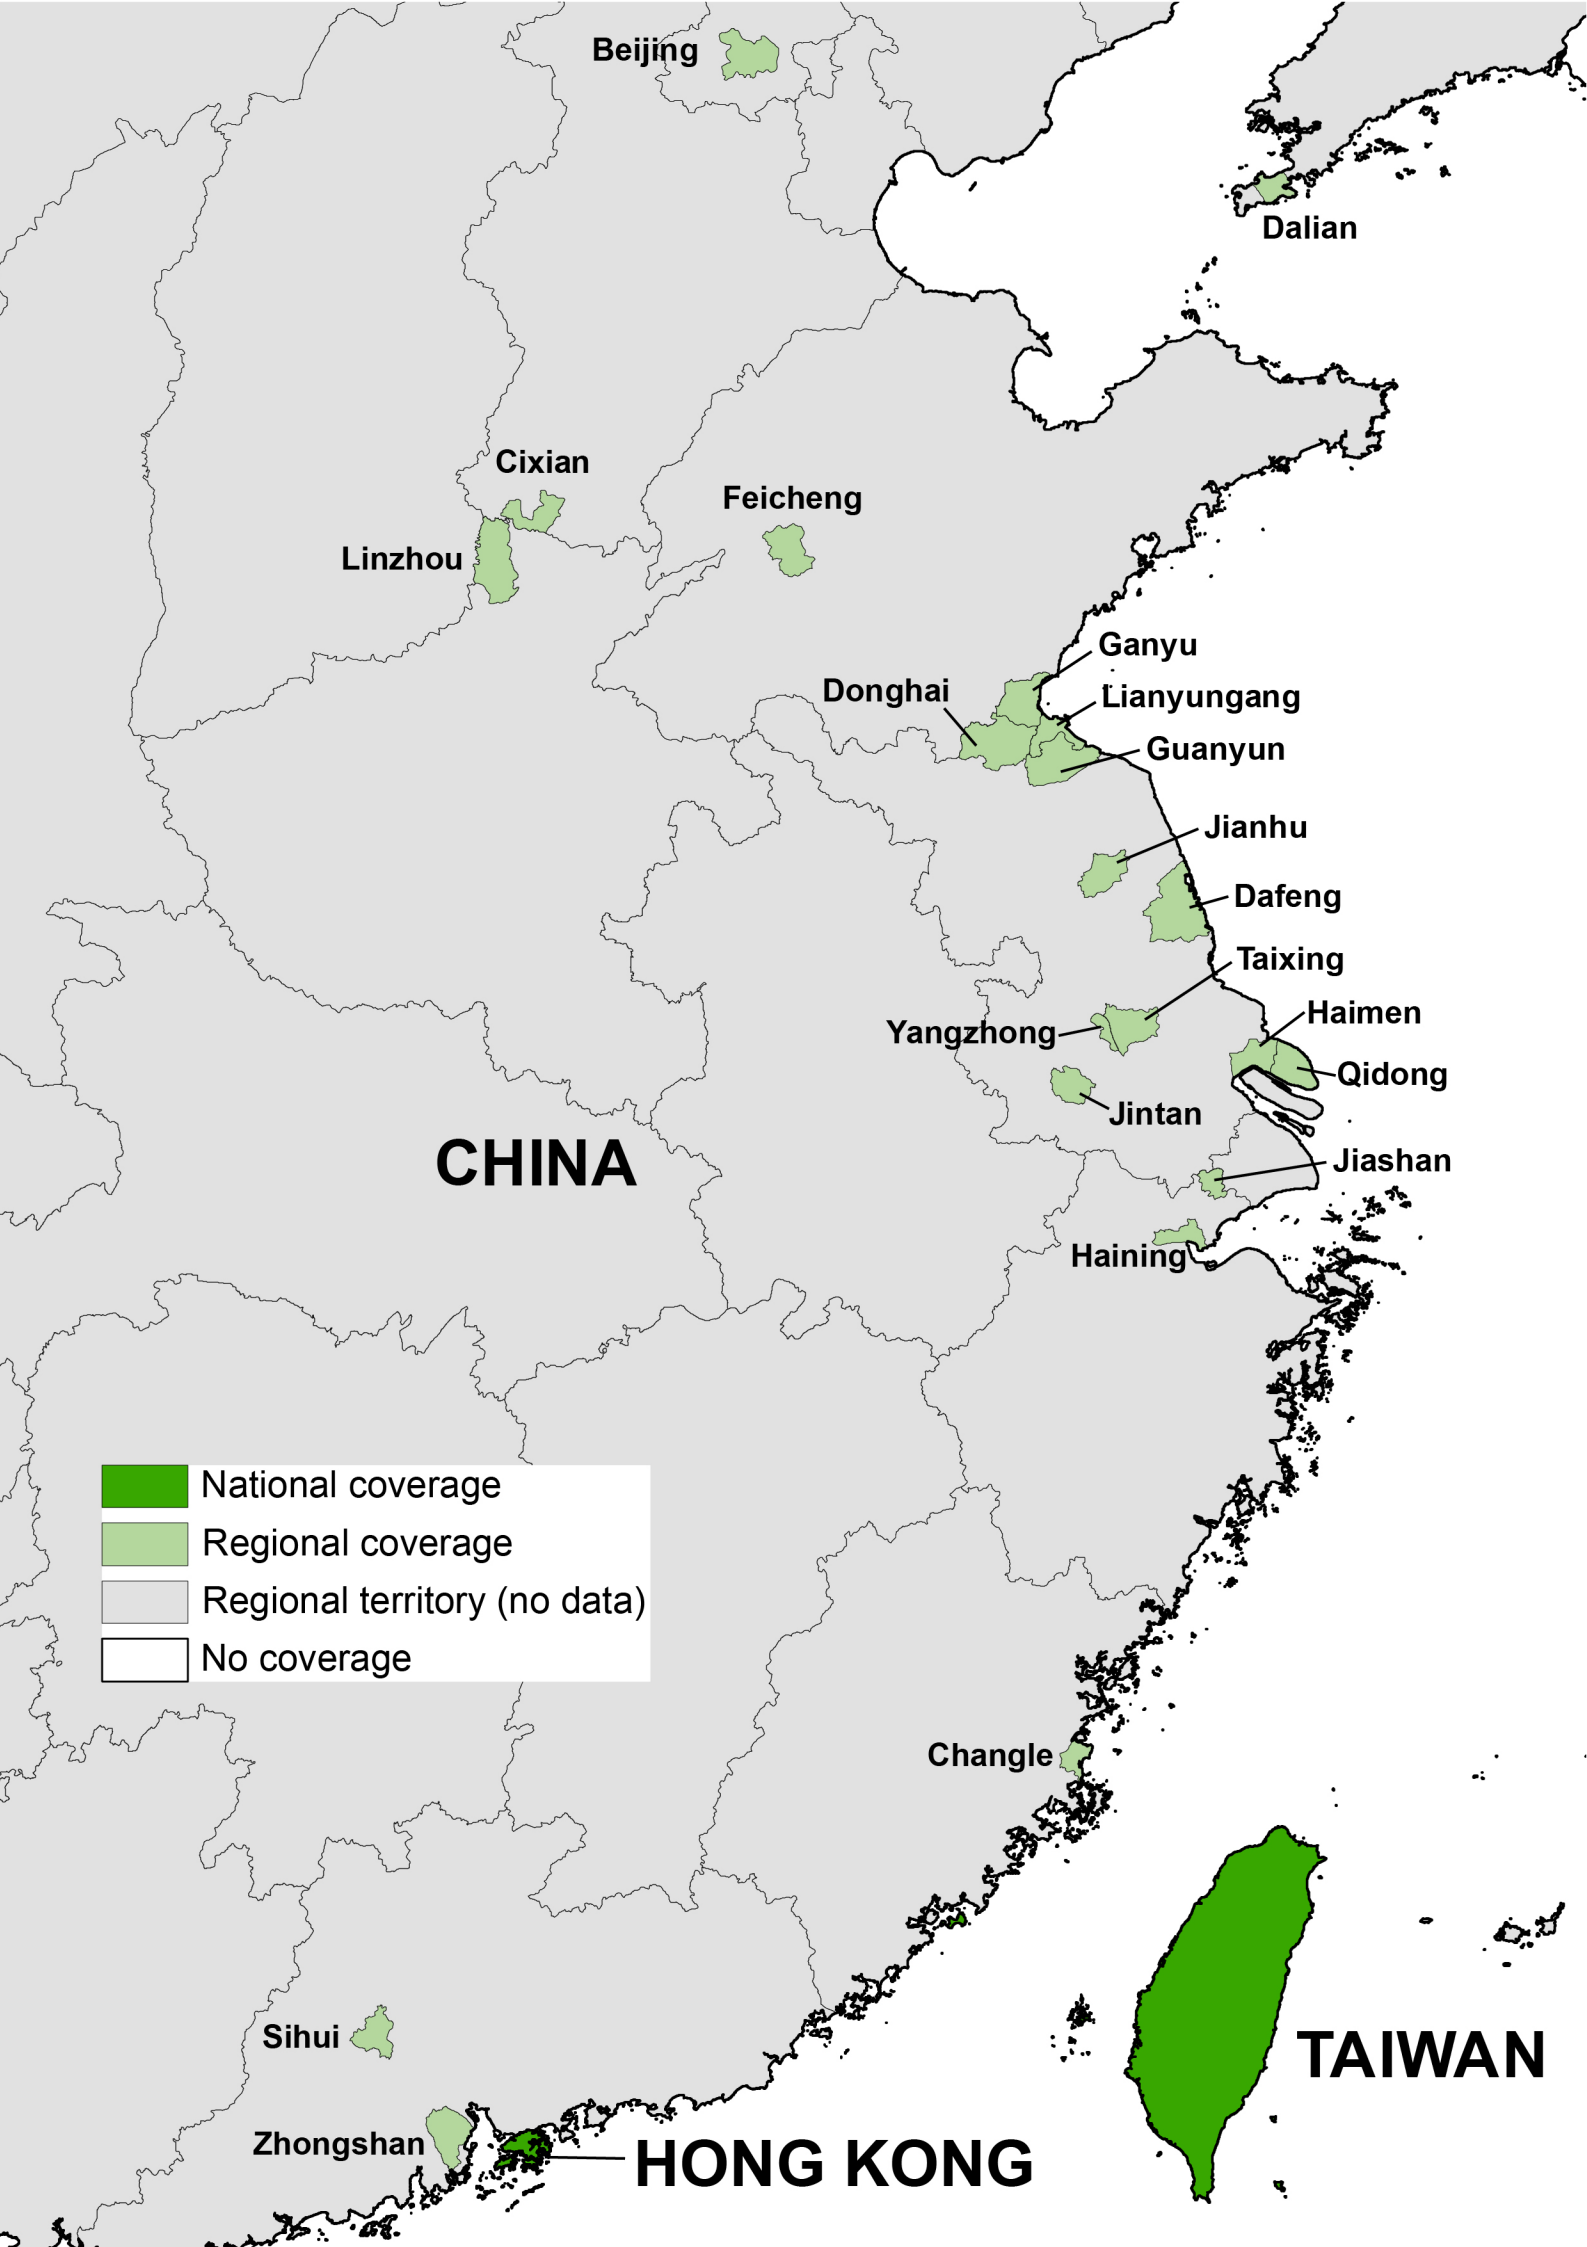

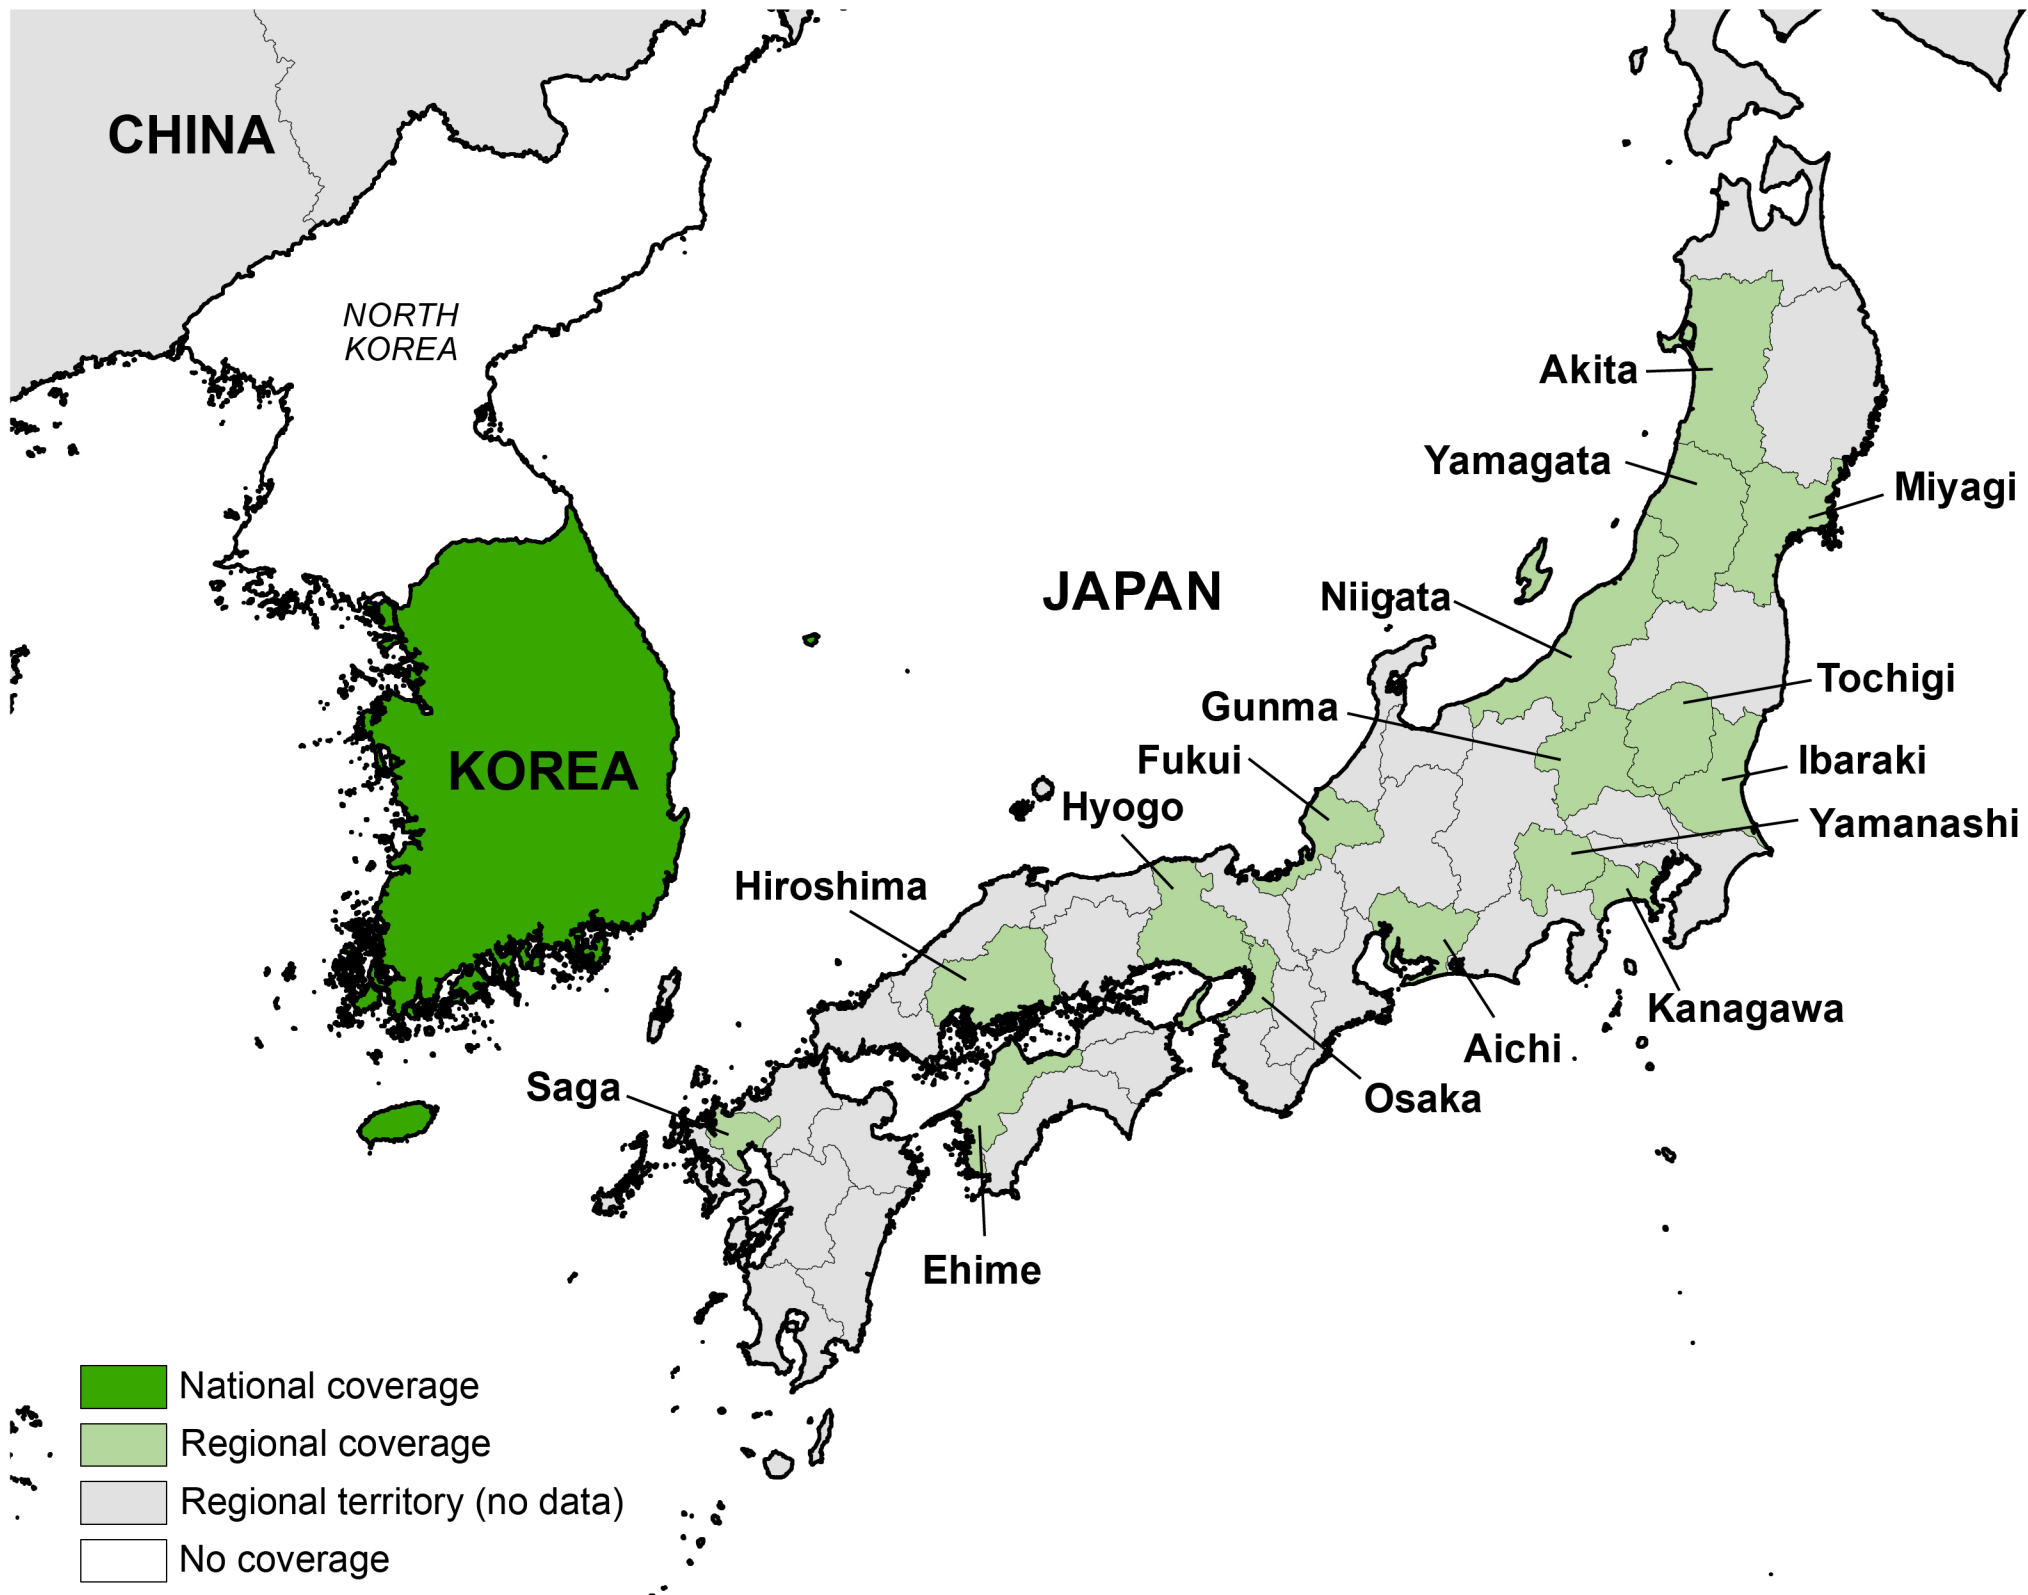

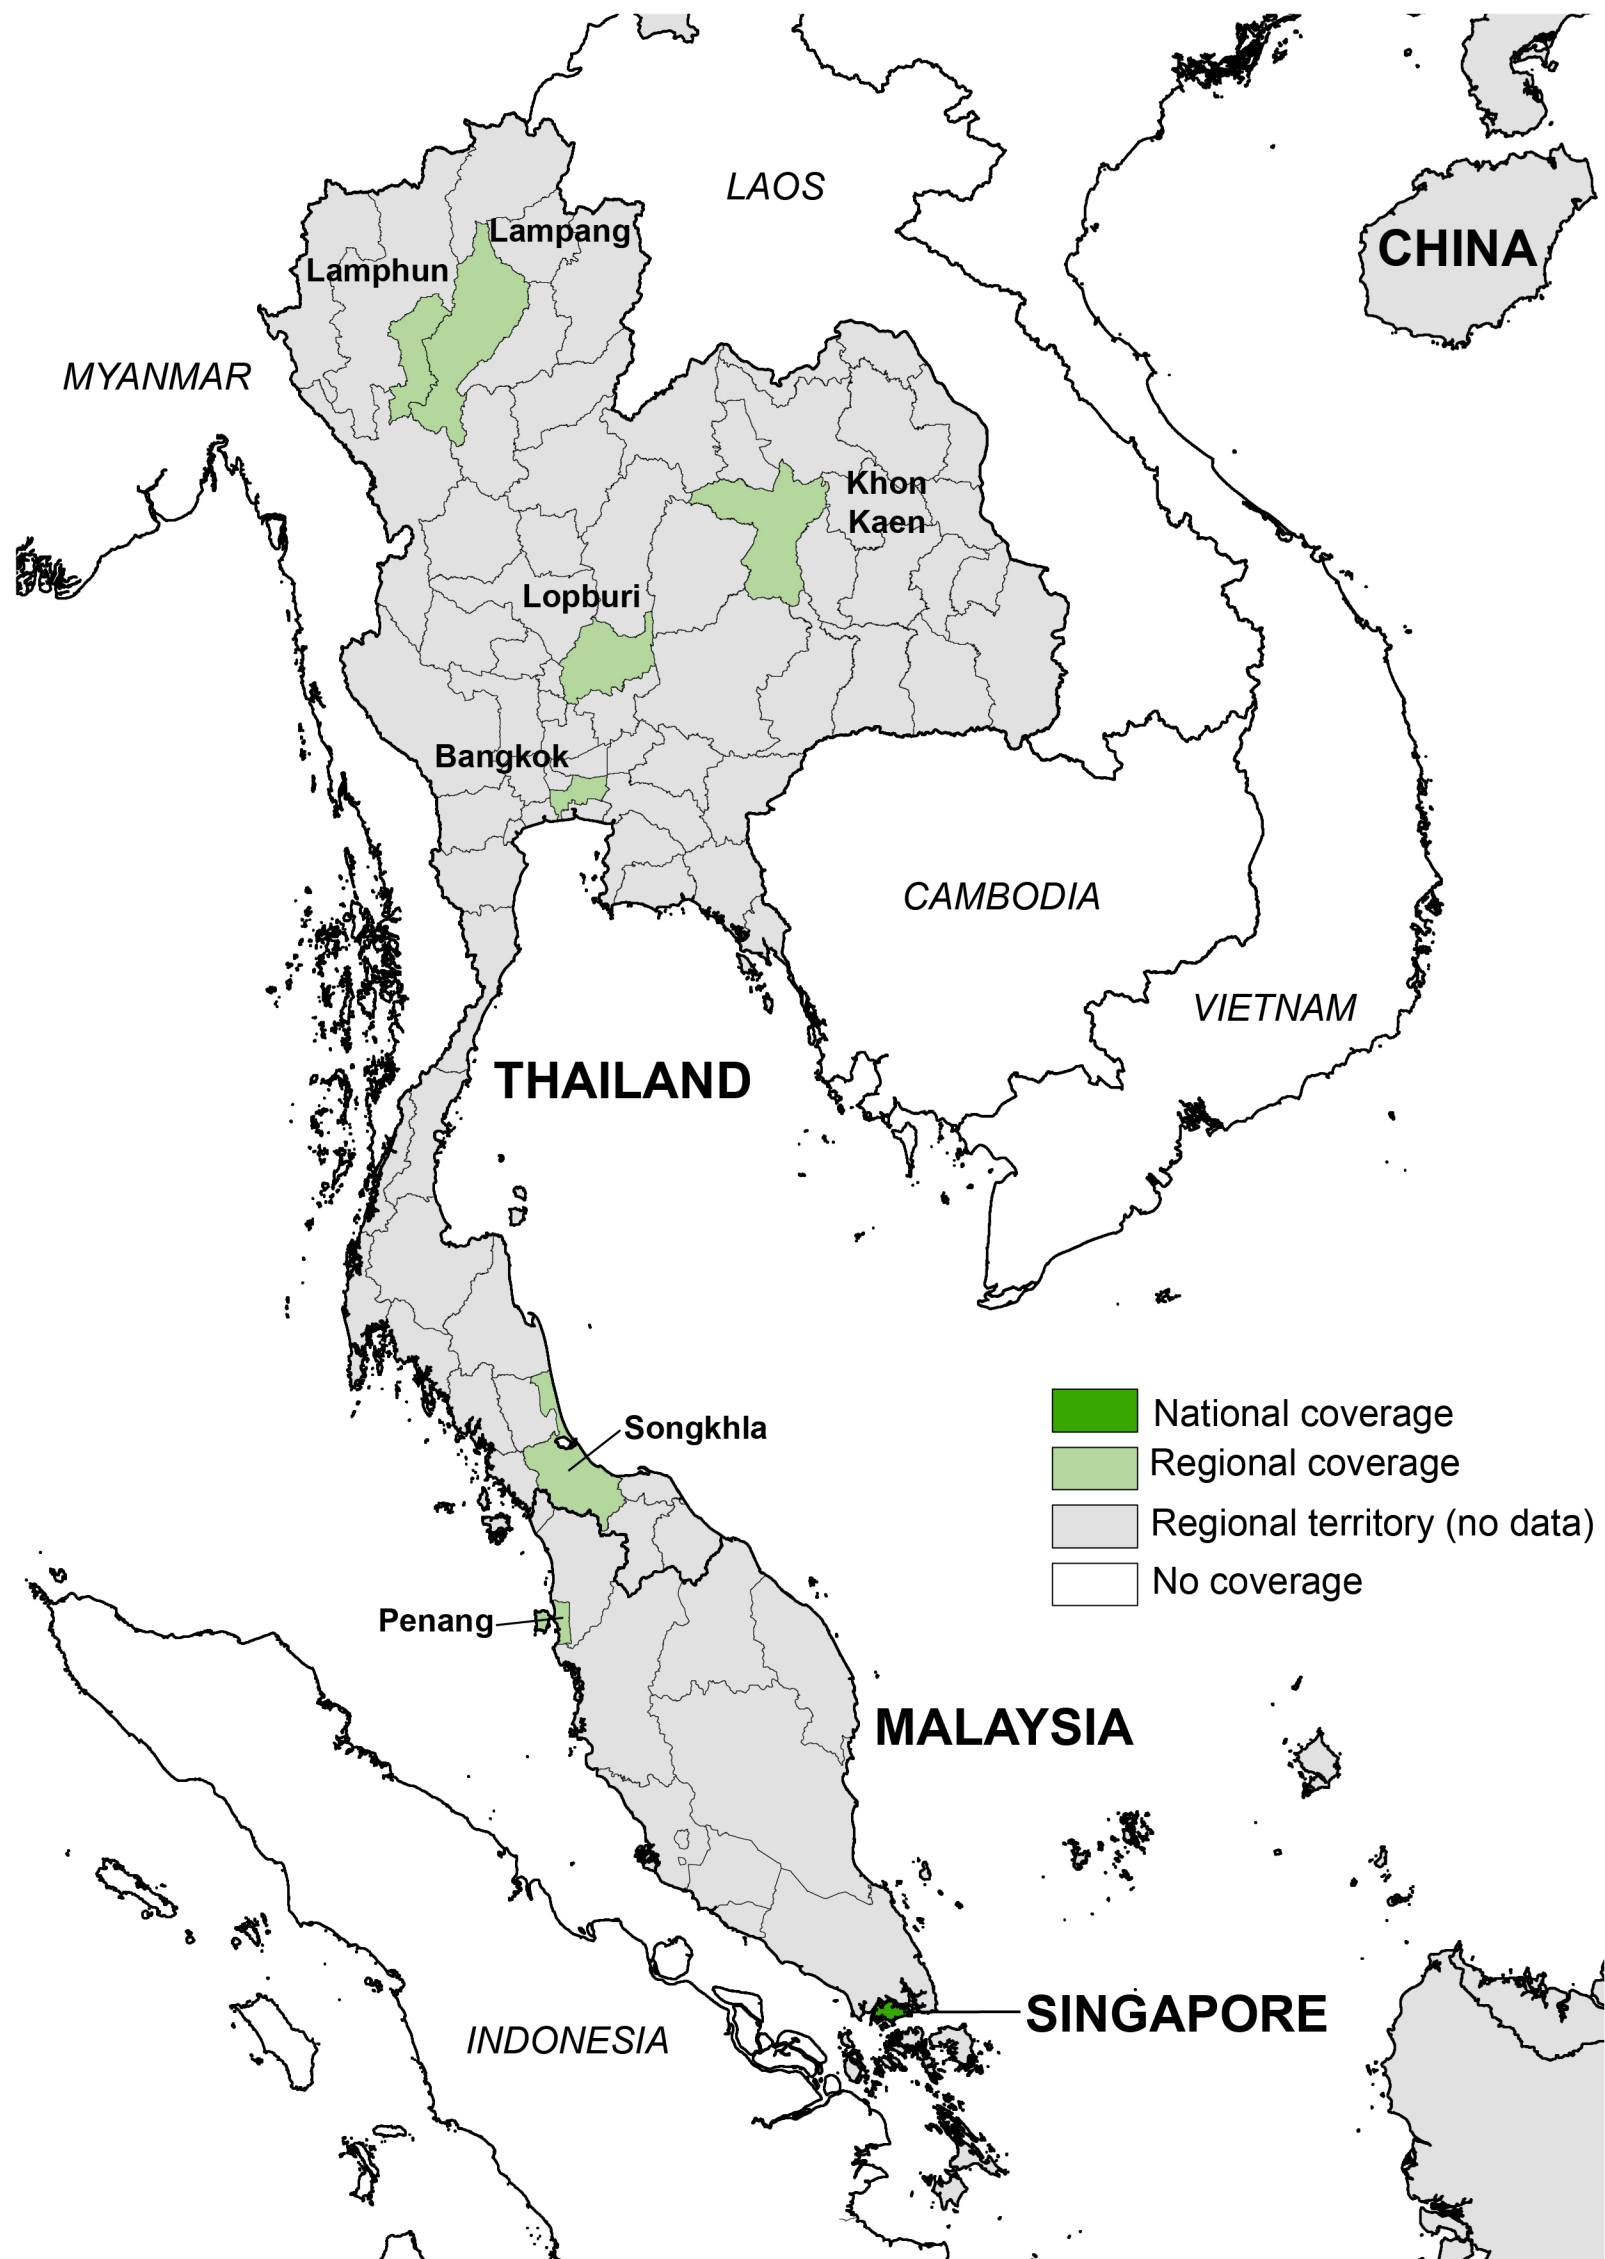

- National coverage
- Regional coverage
- Regional territory (no data)
- No coverage

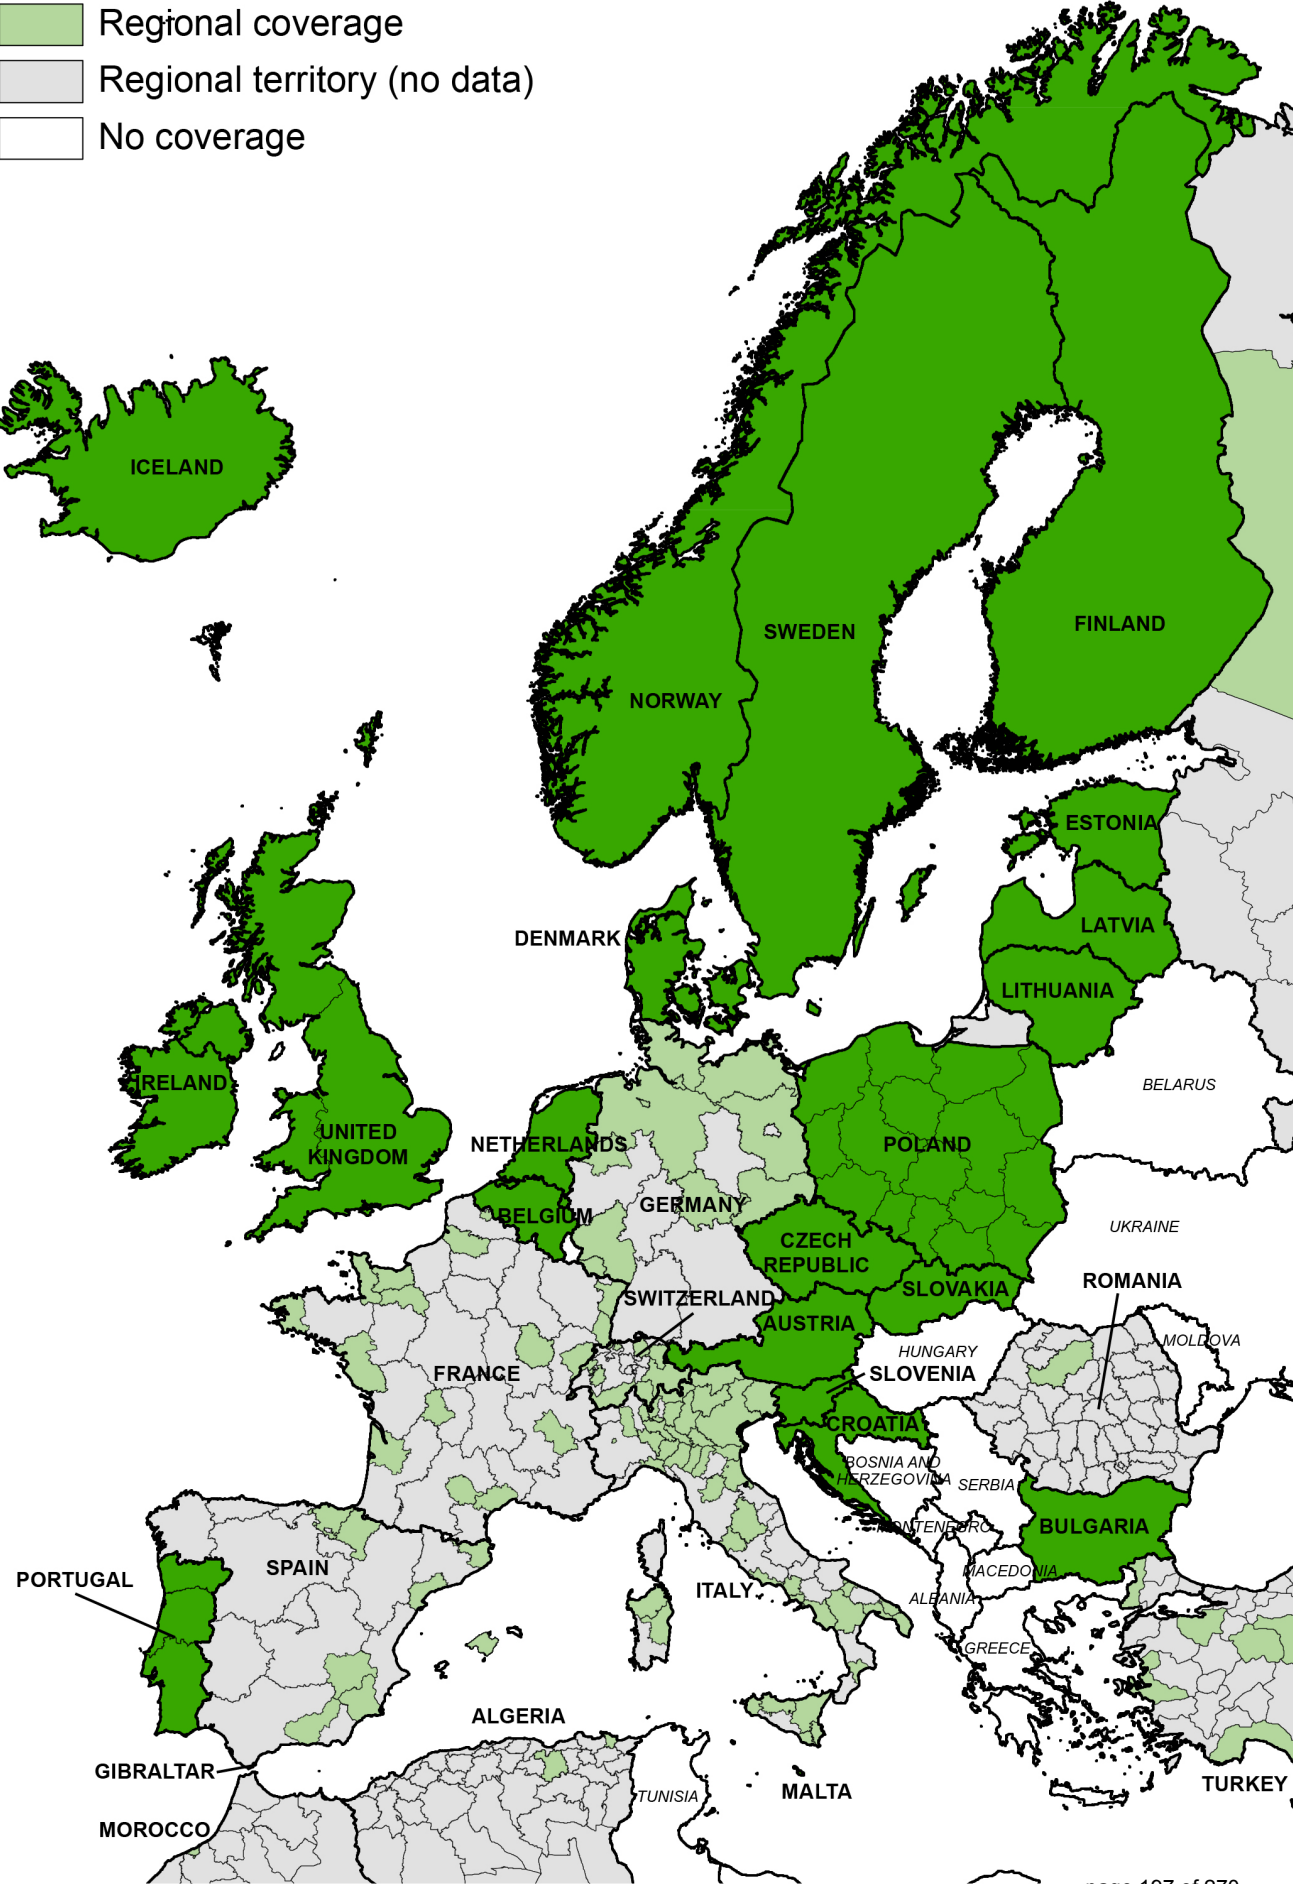

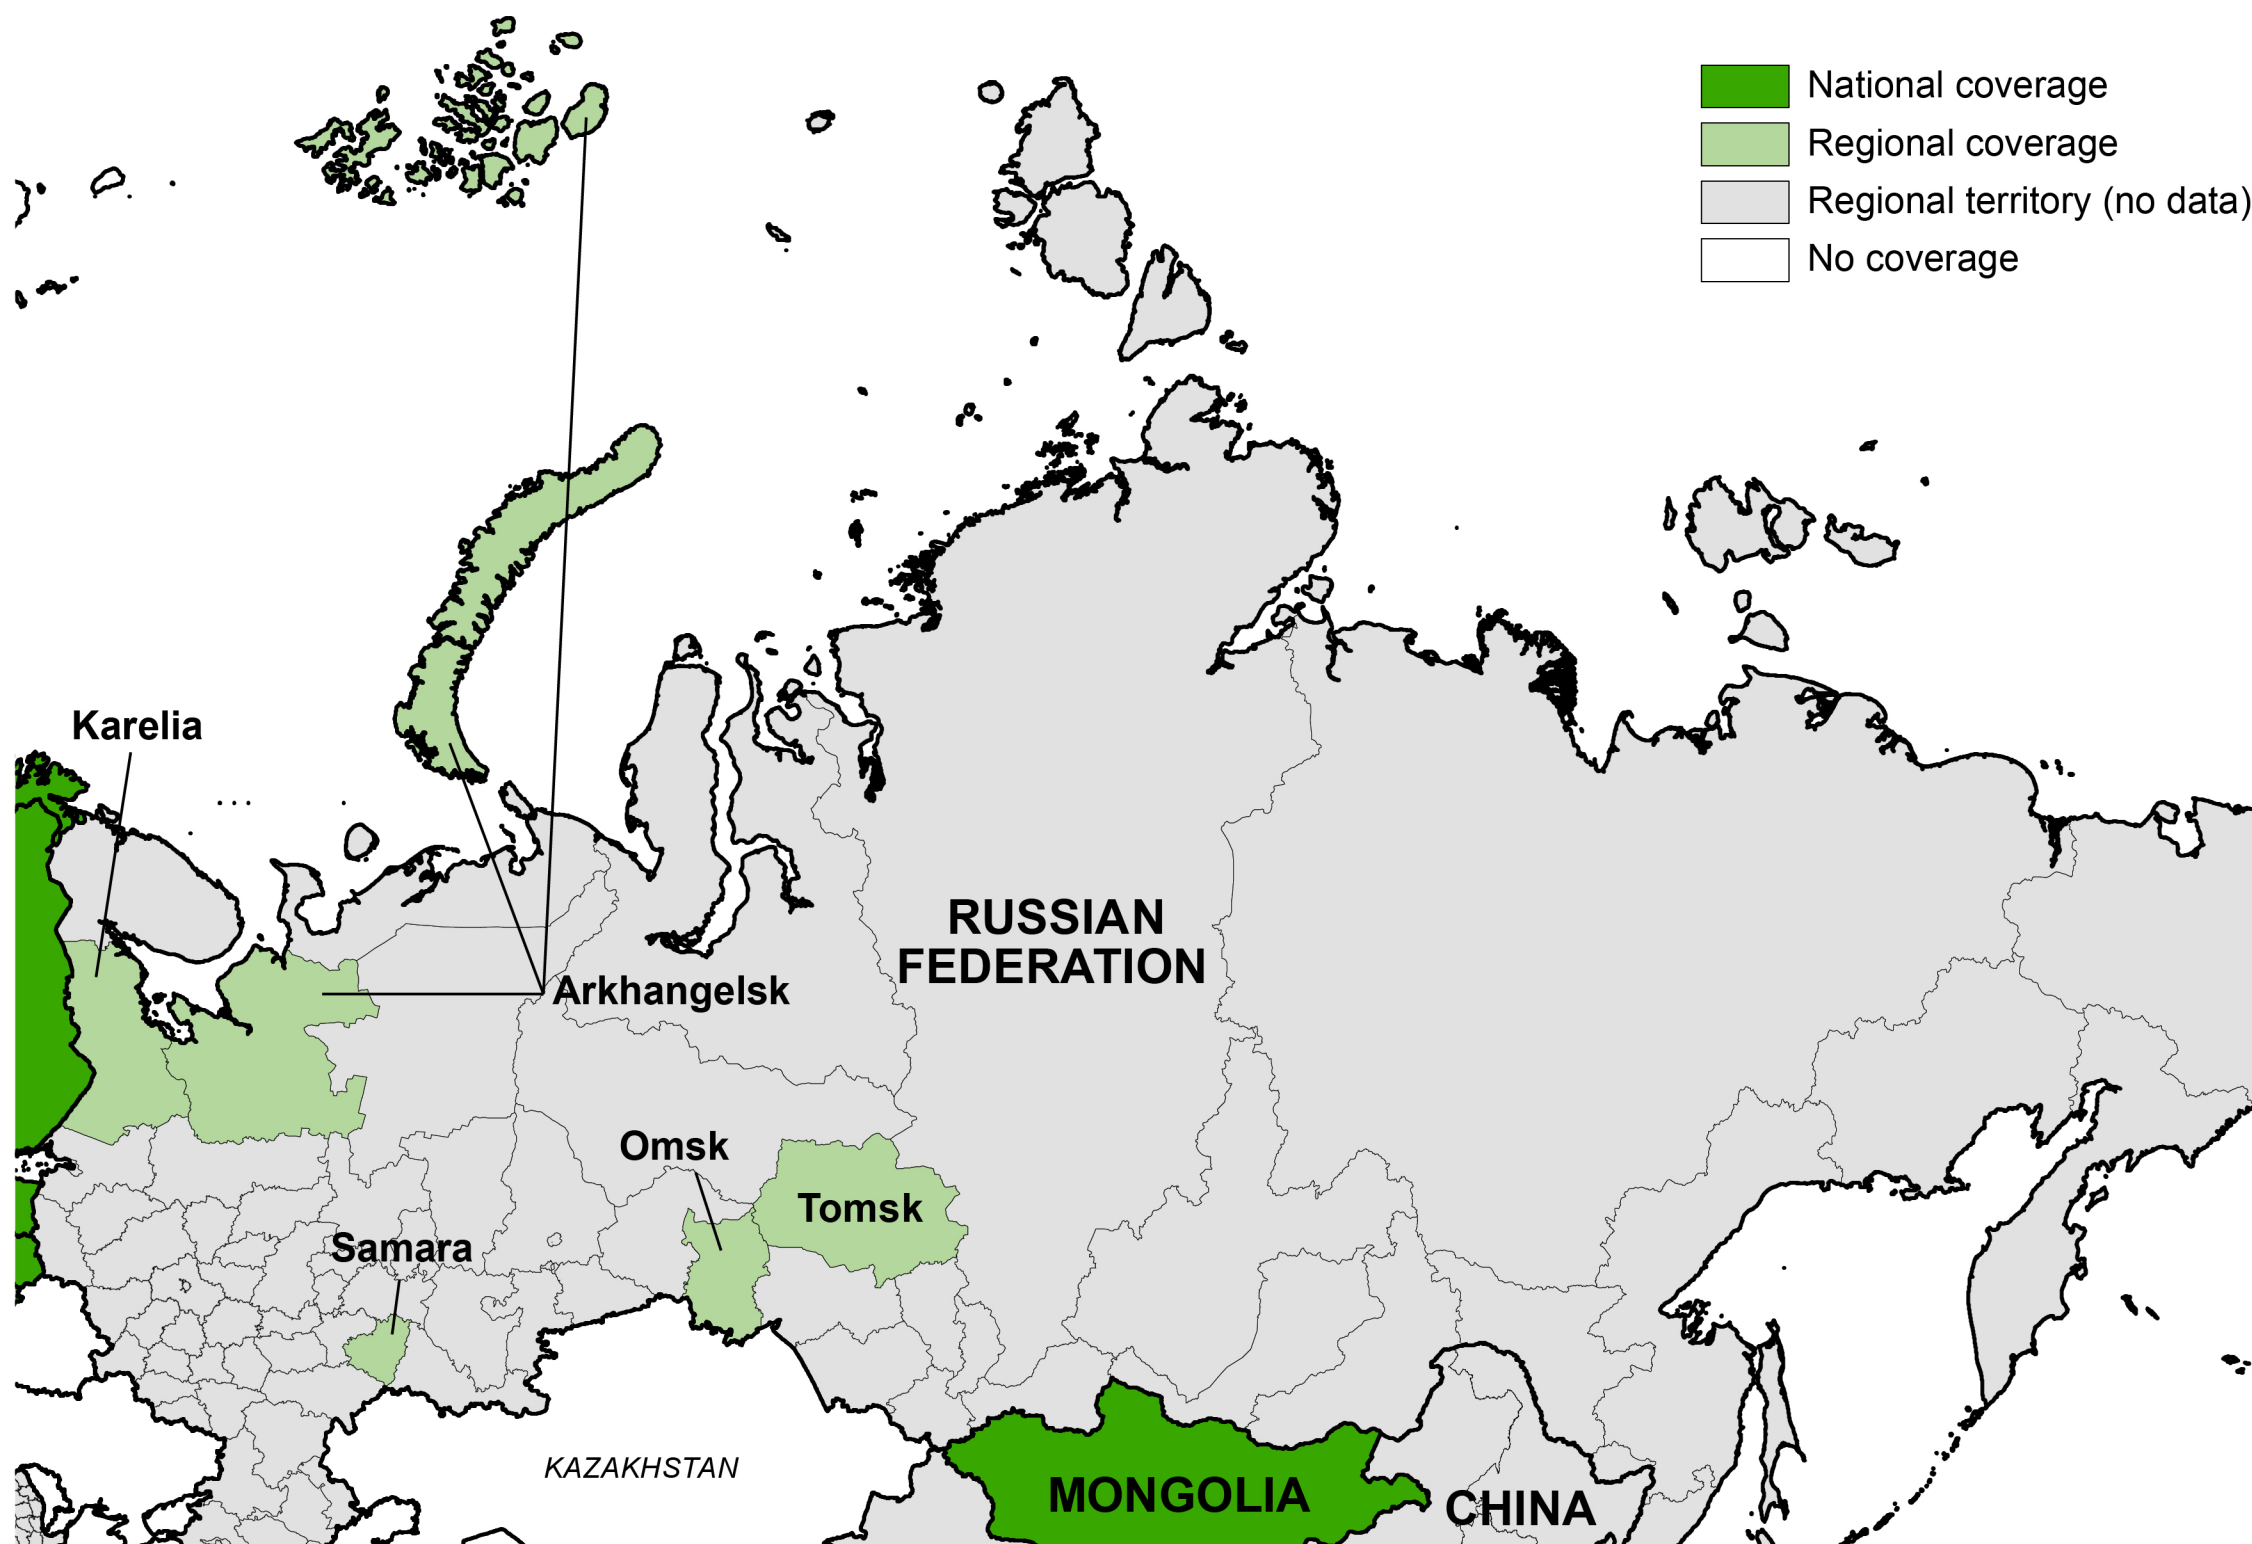

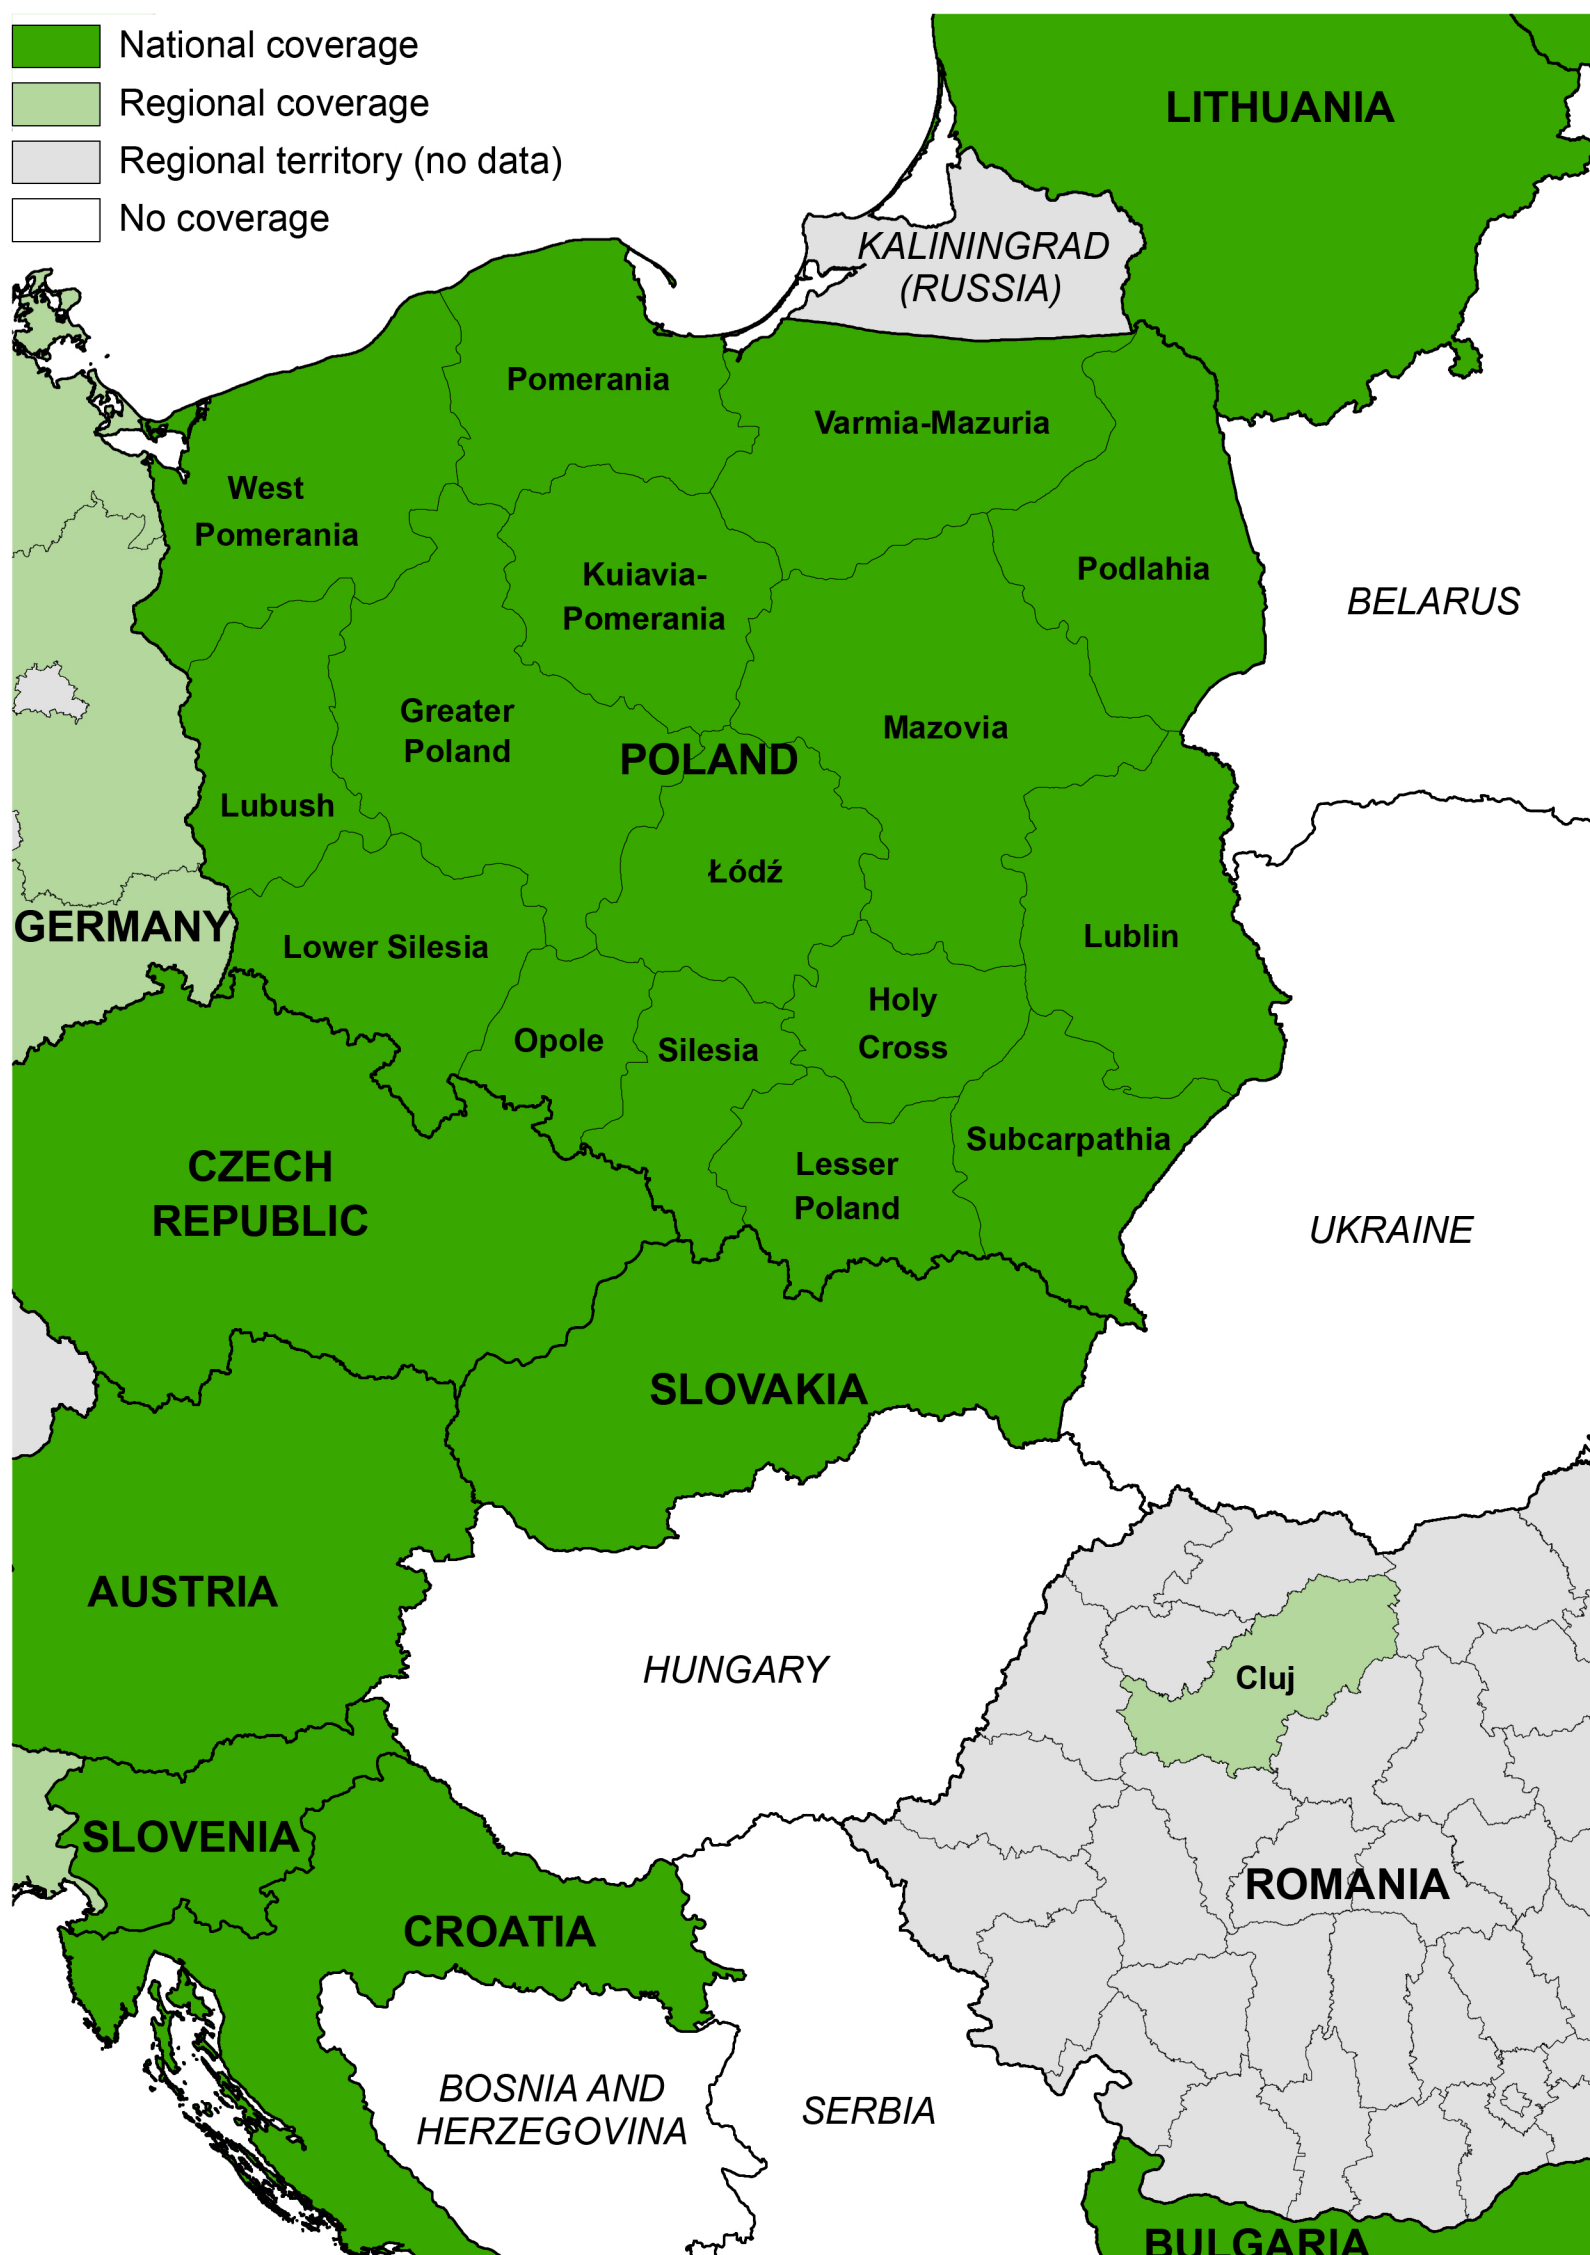

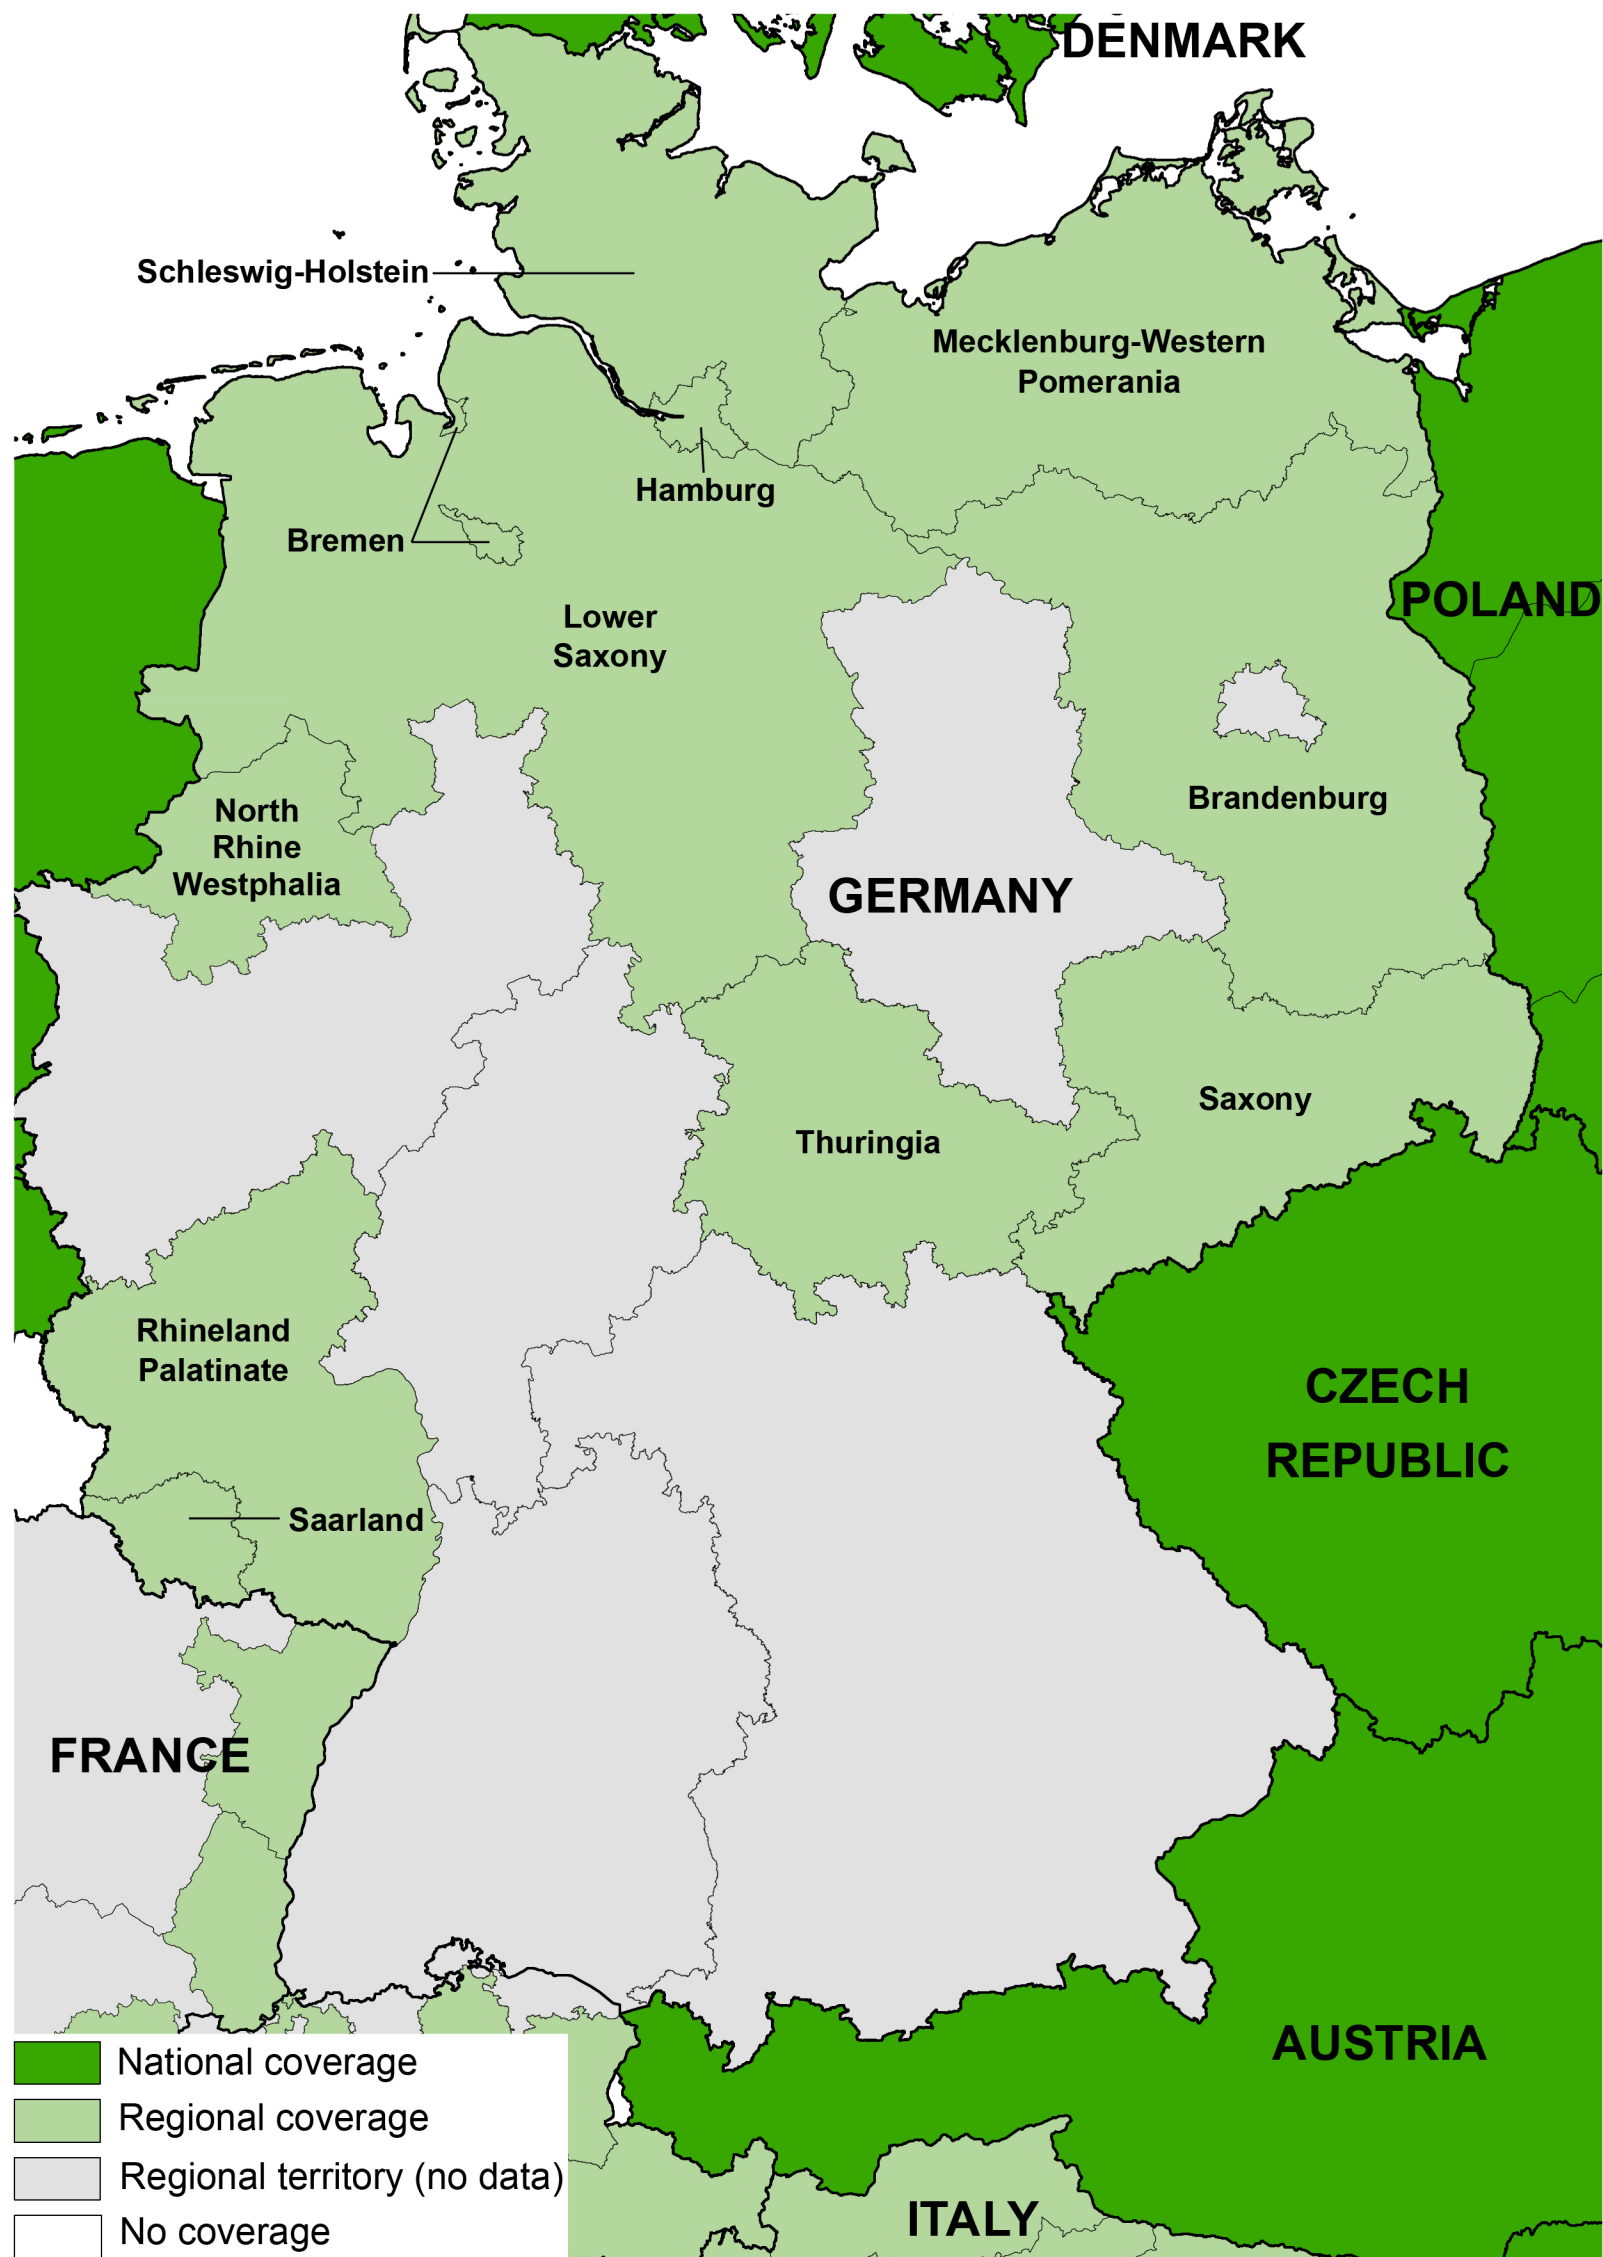

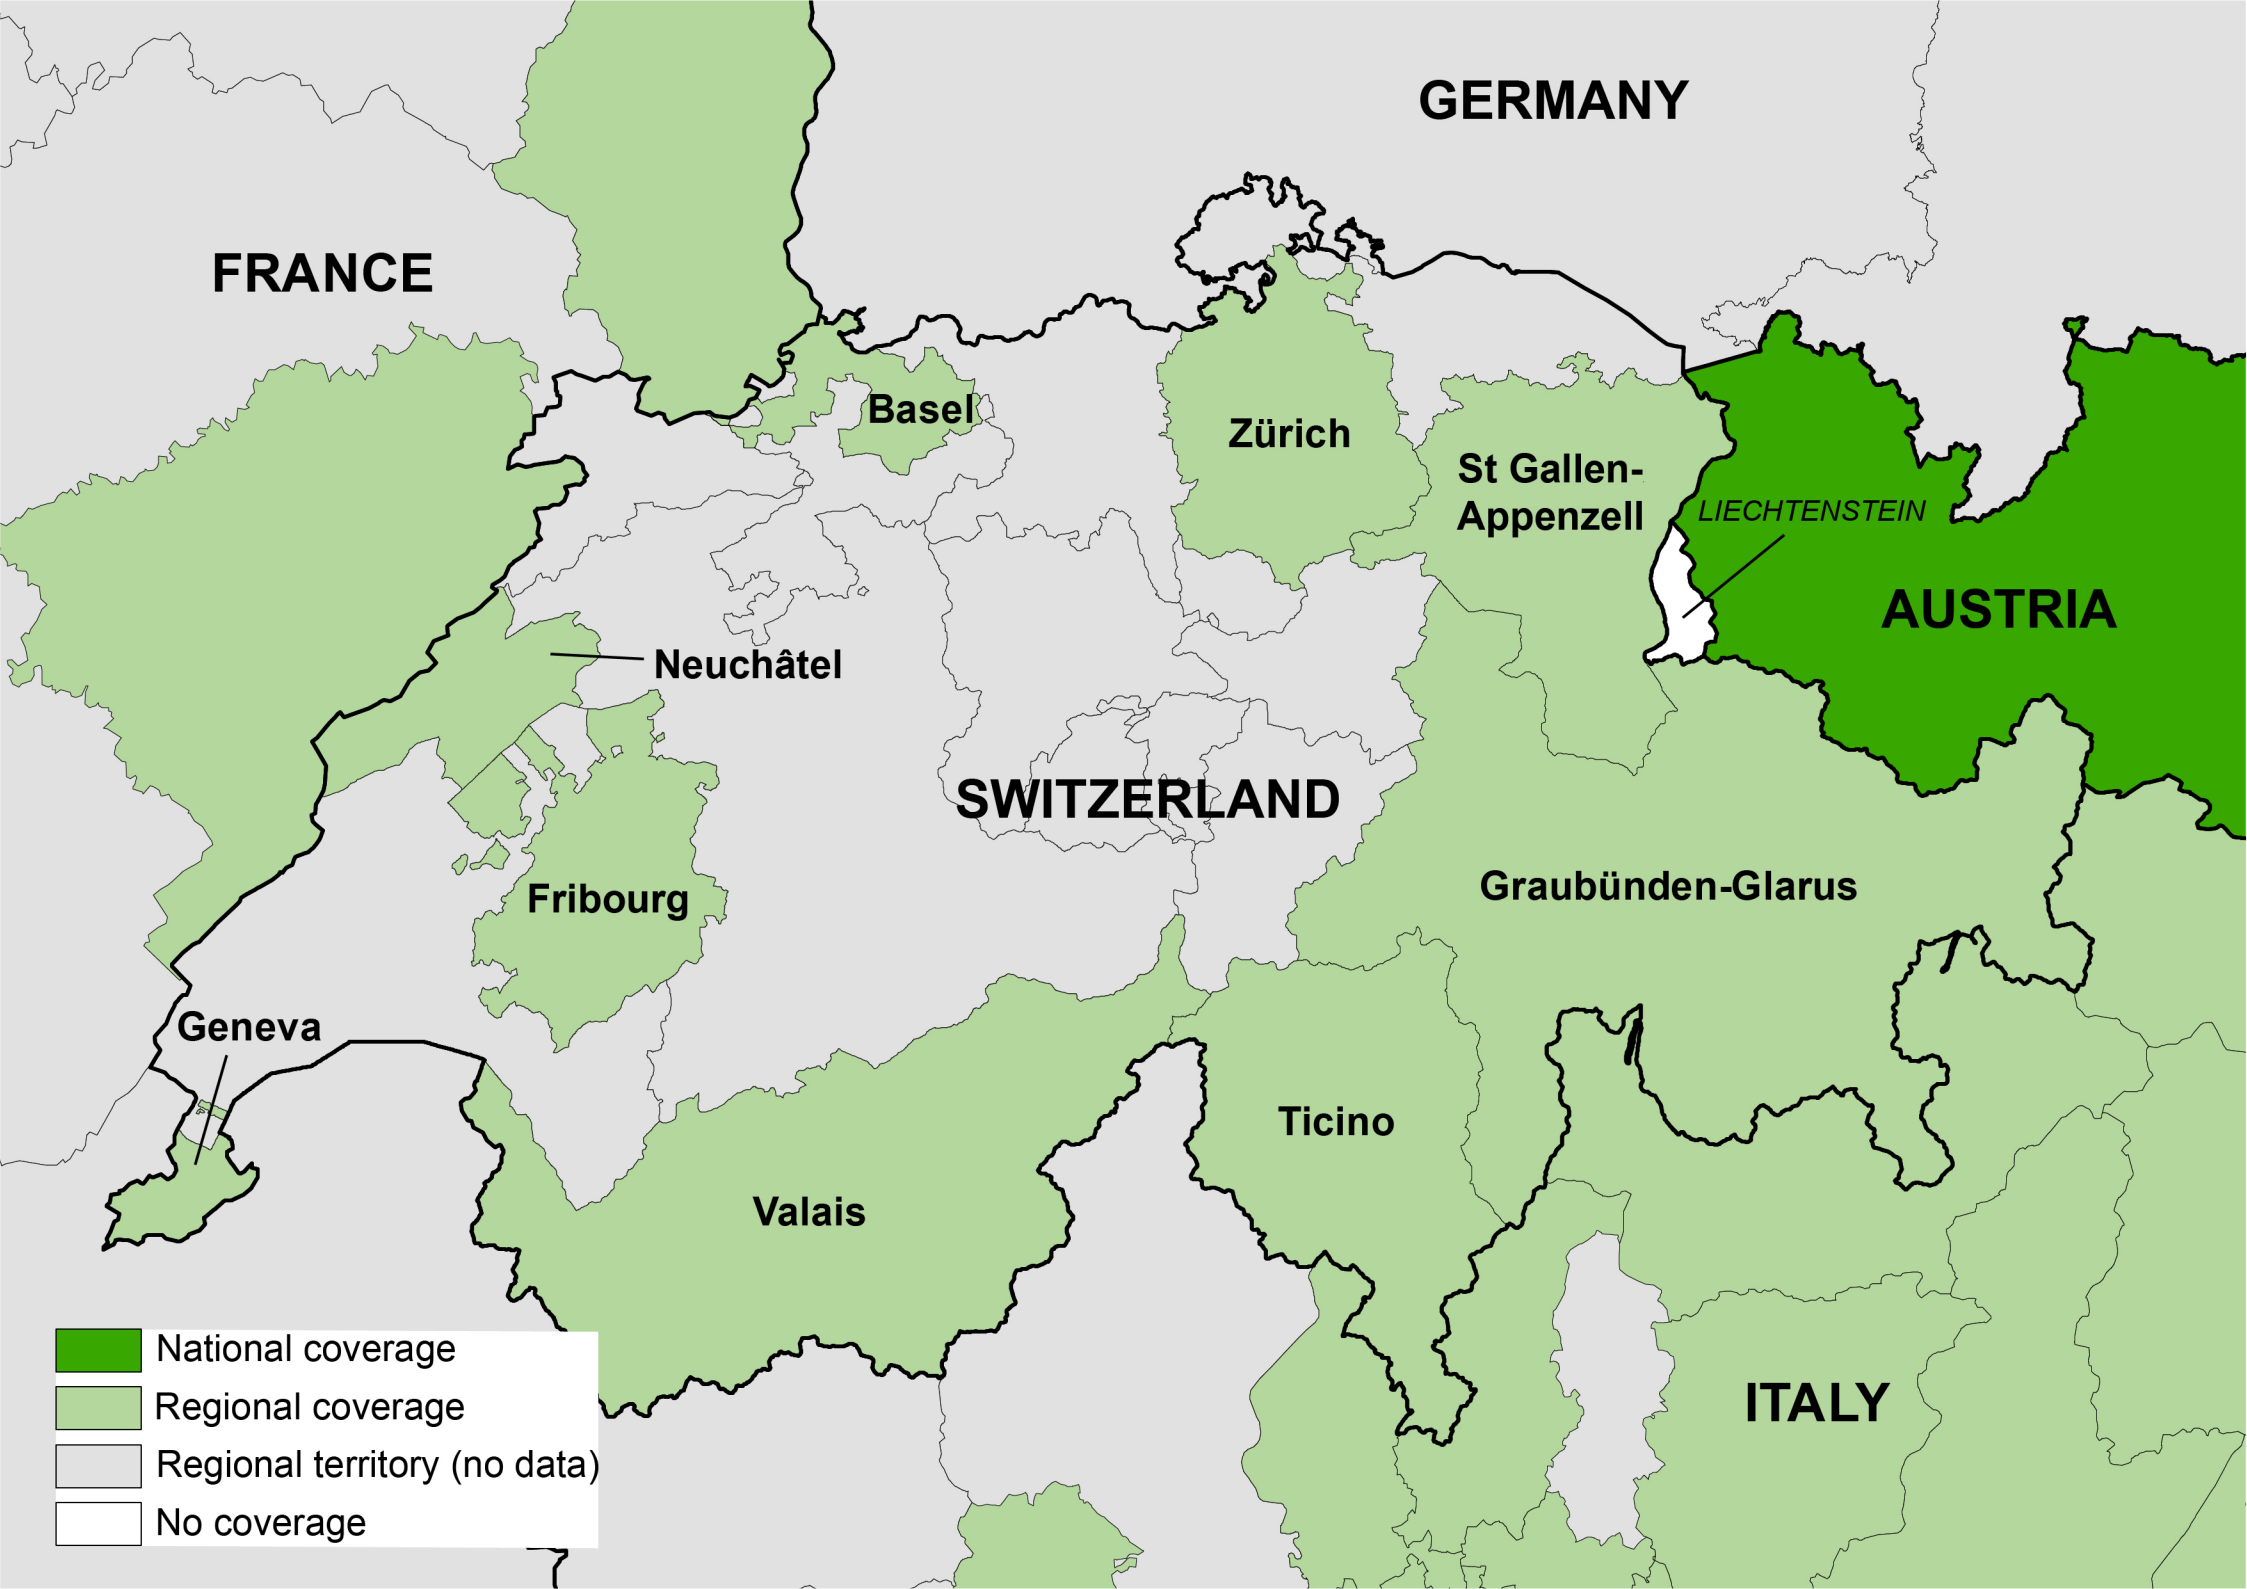

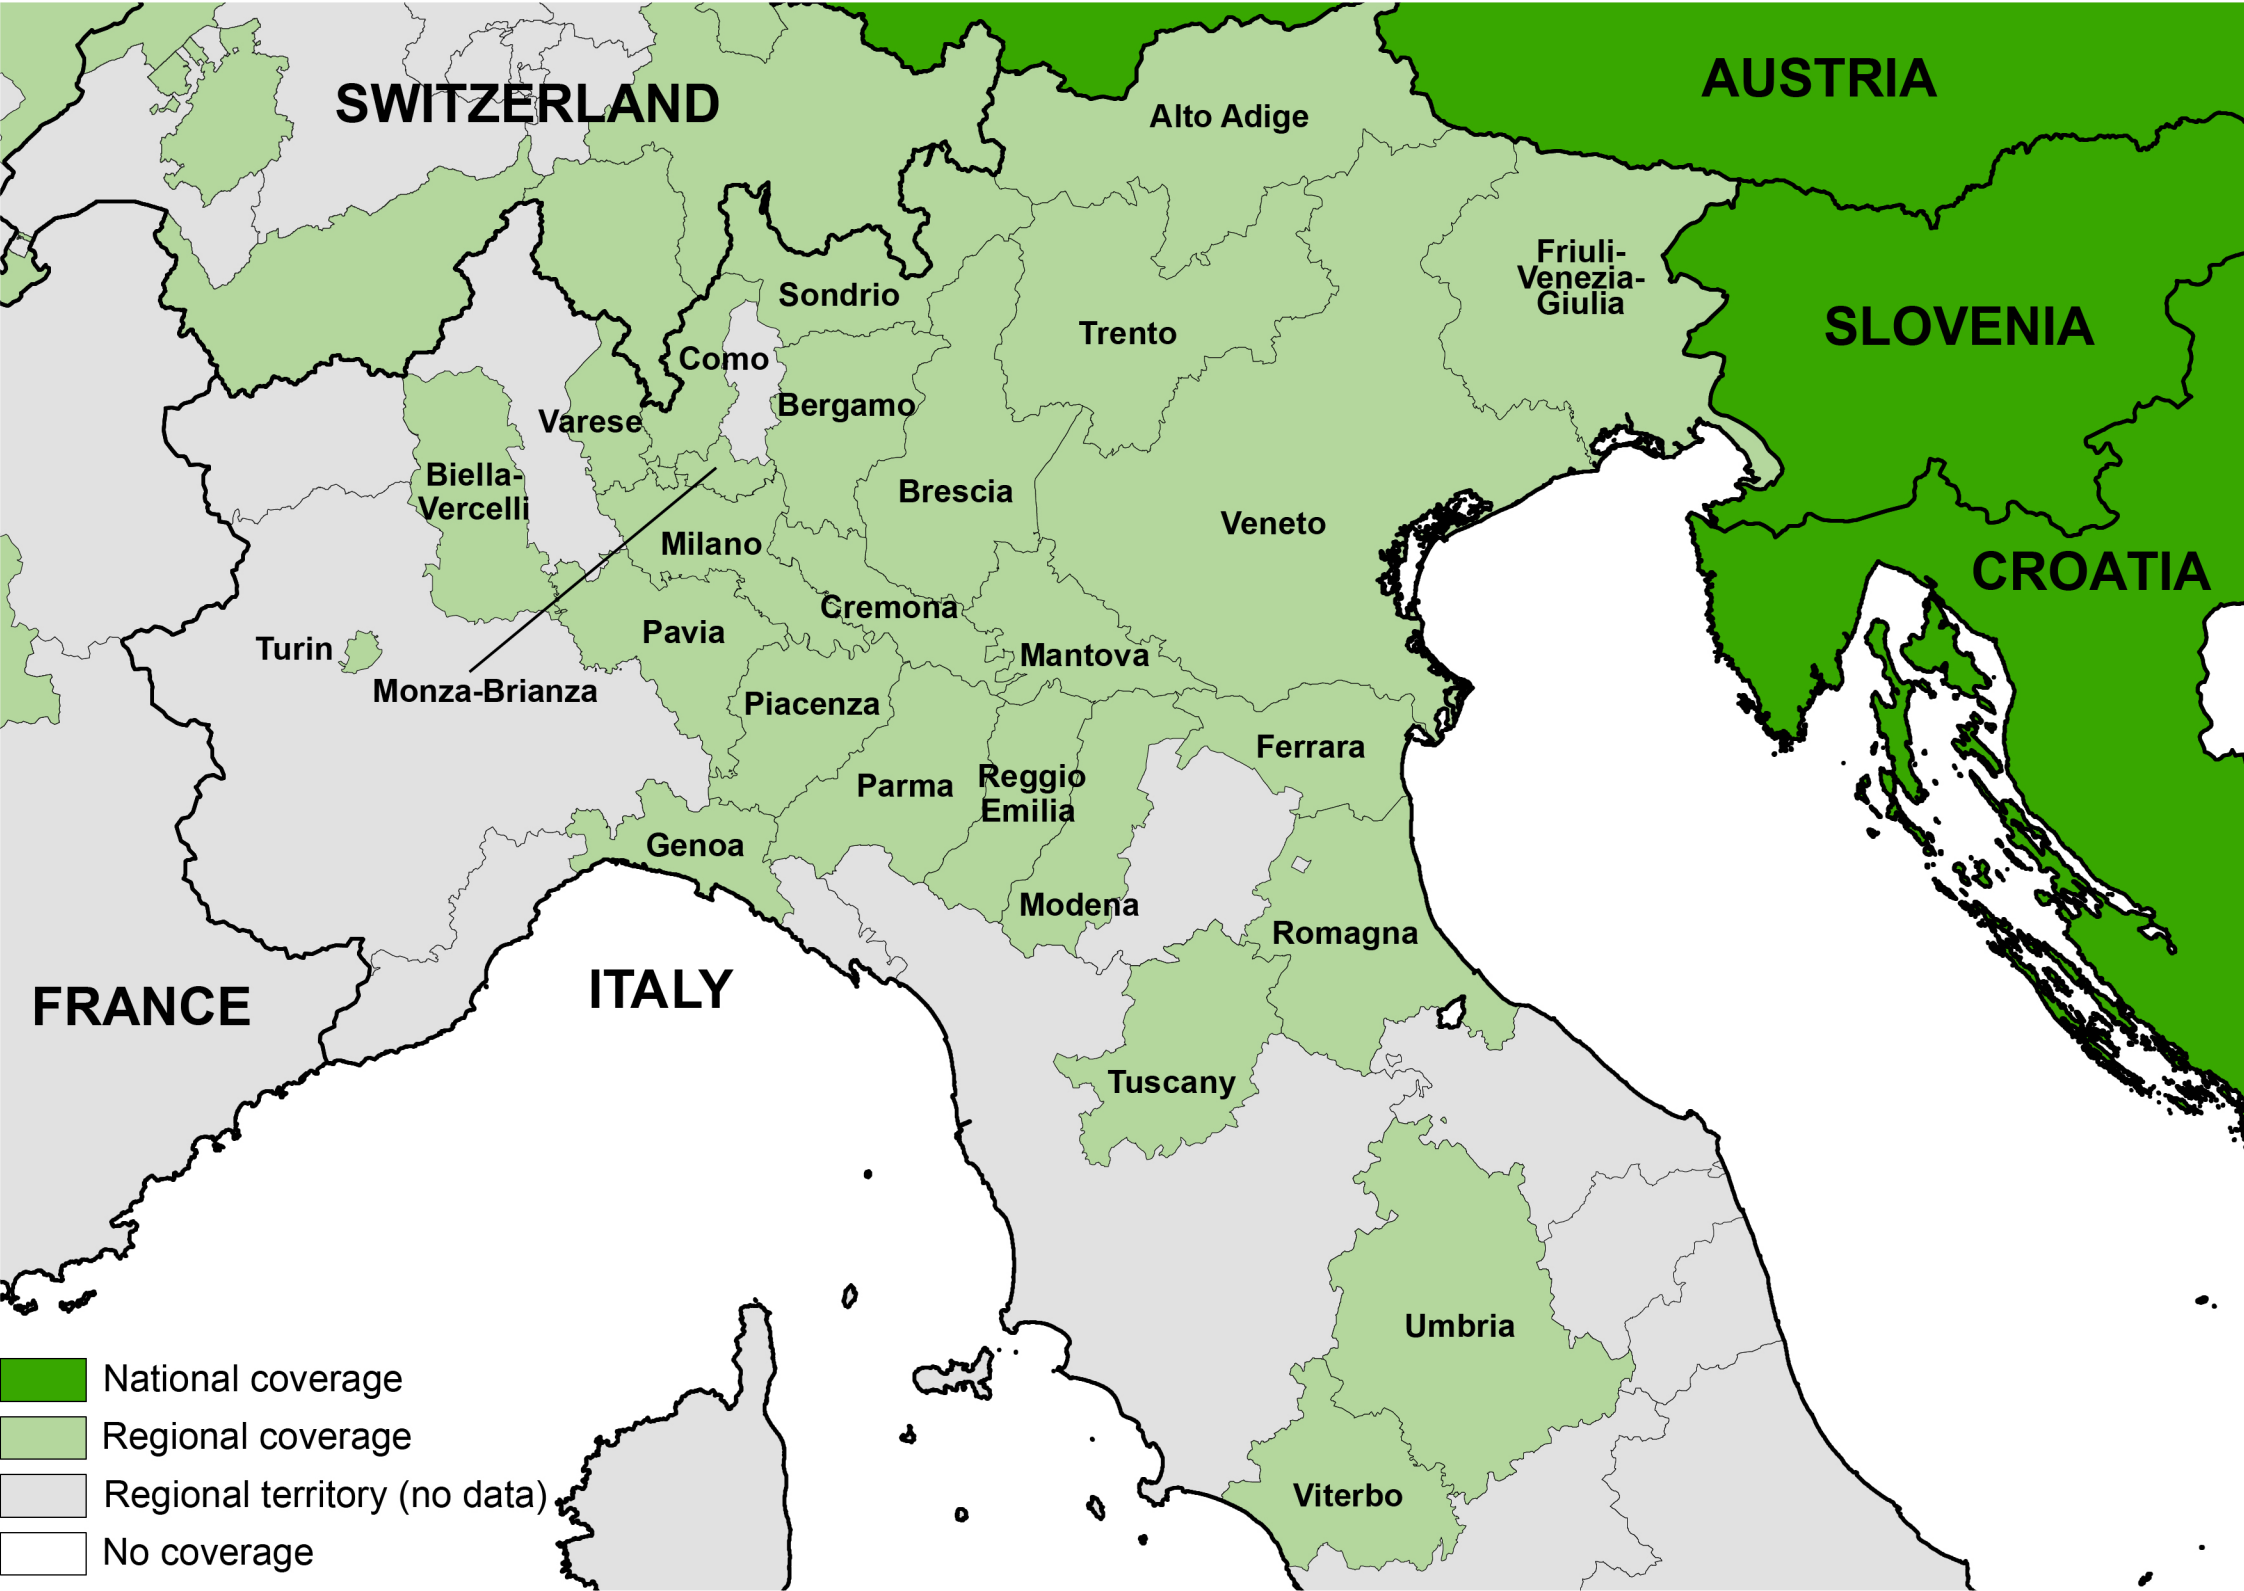

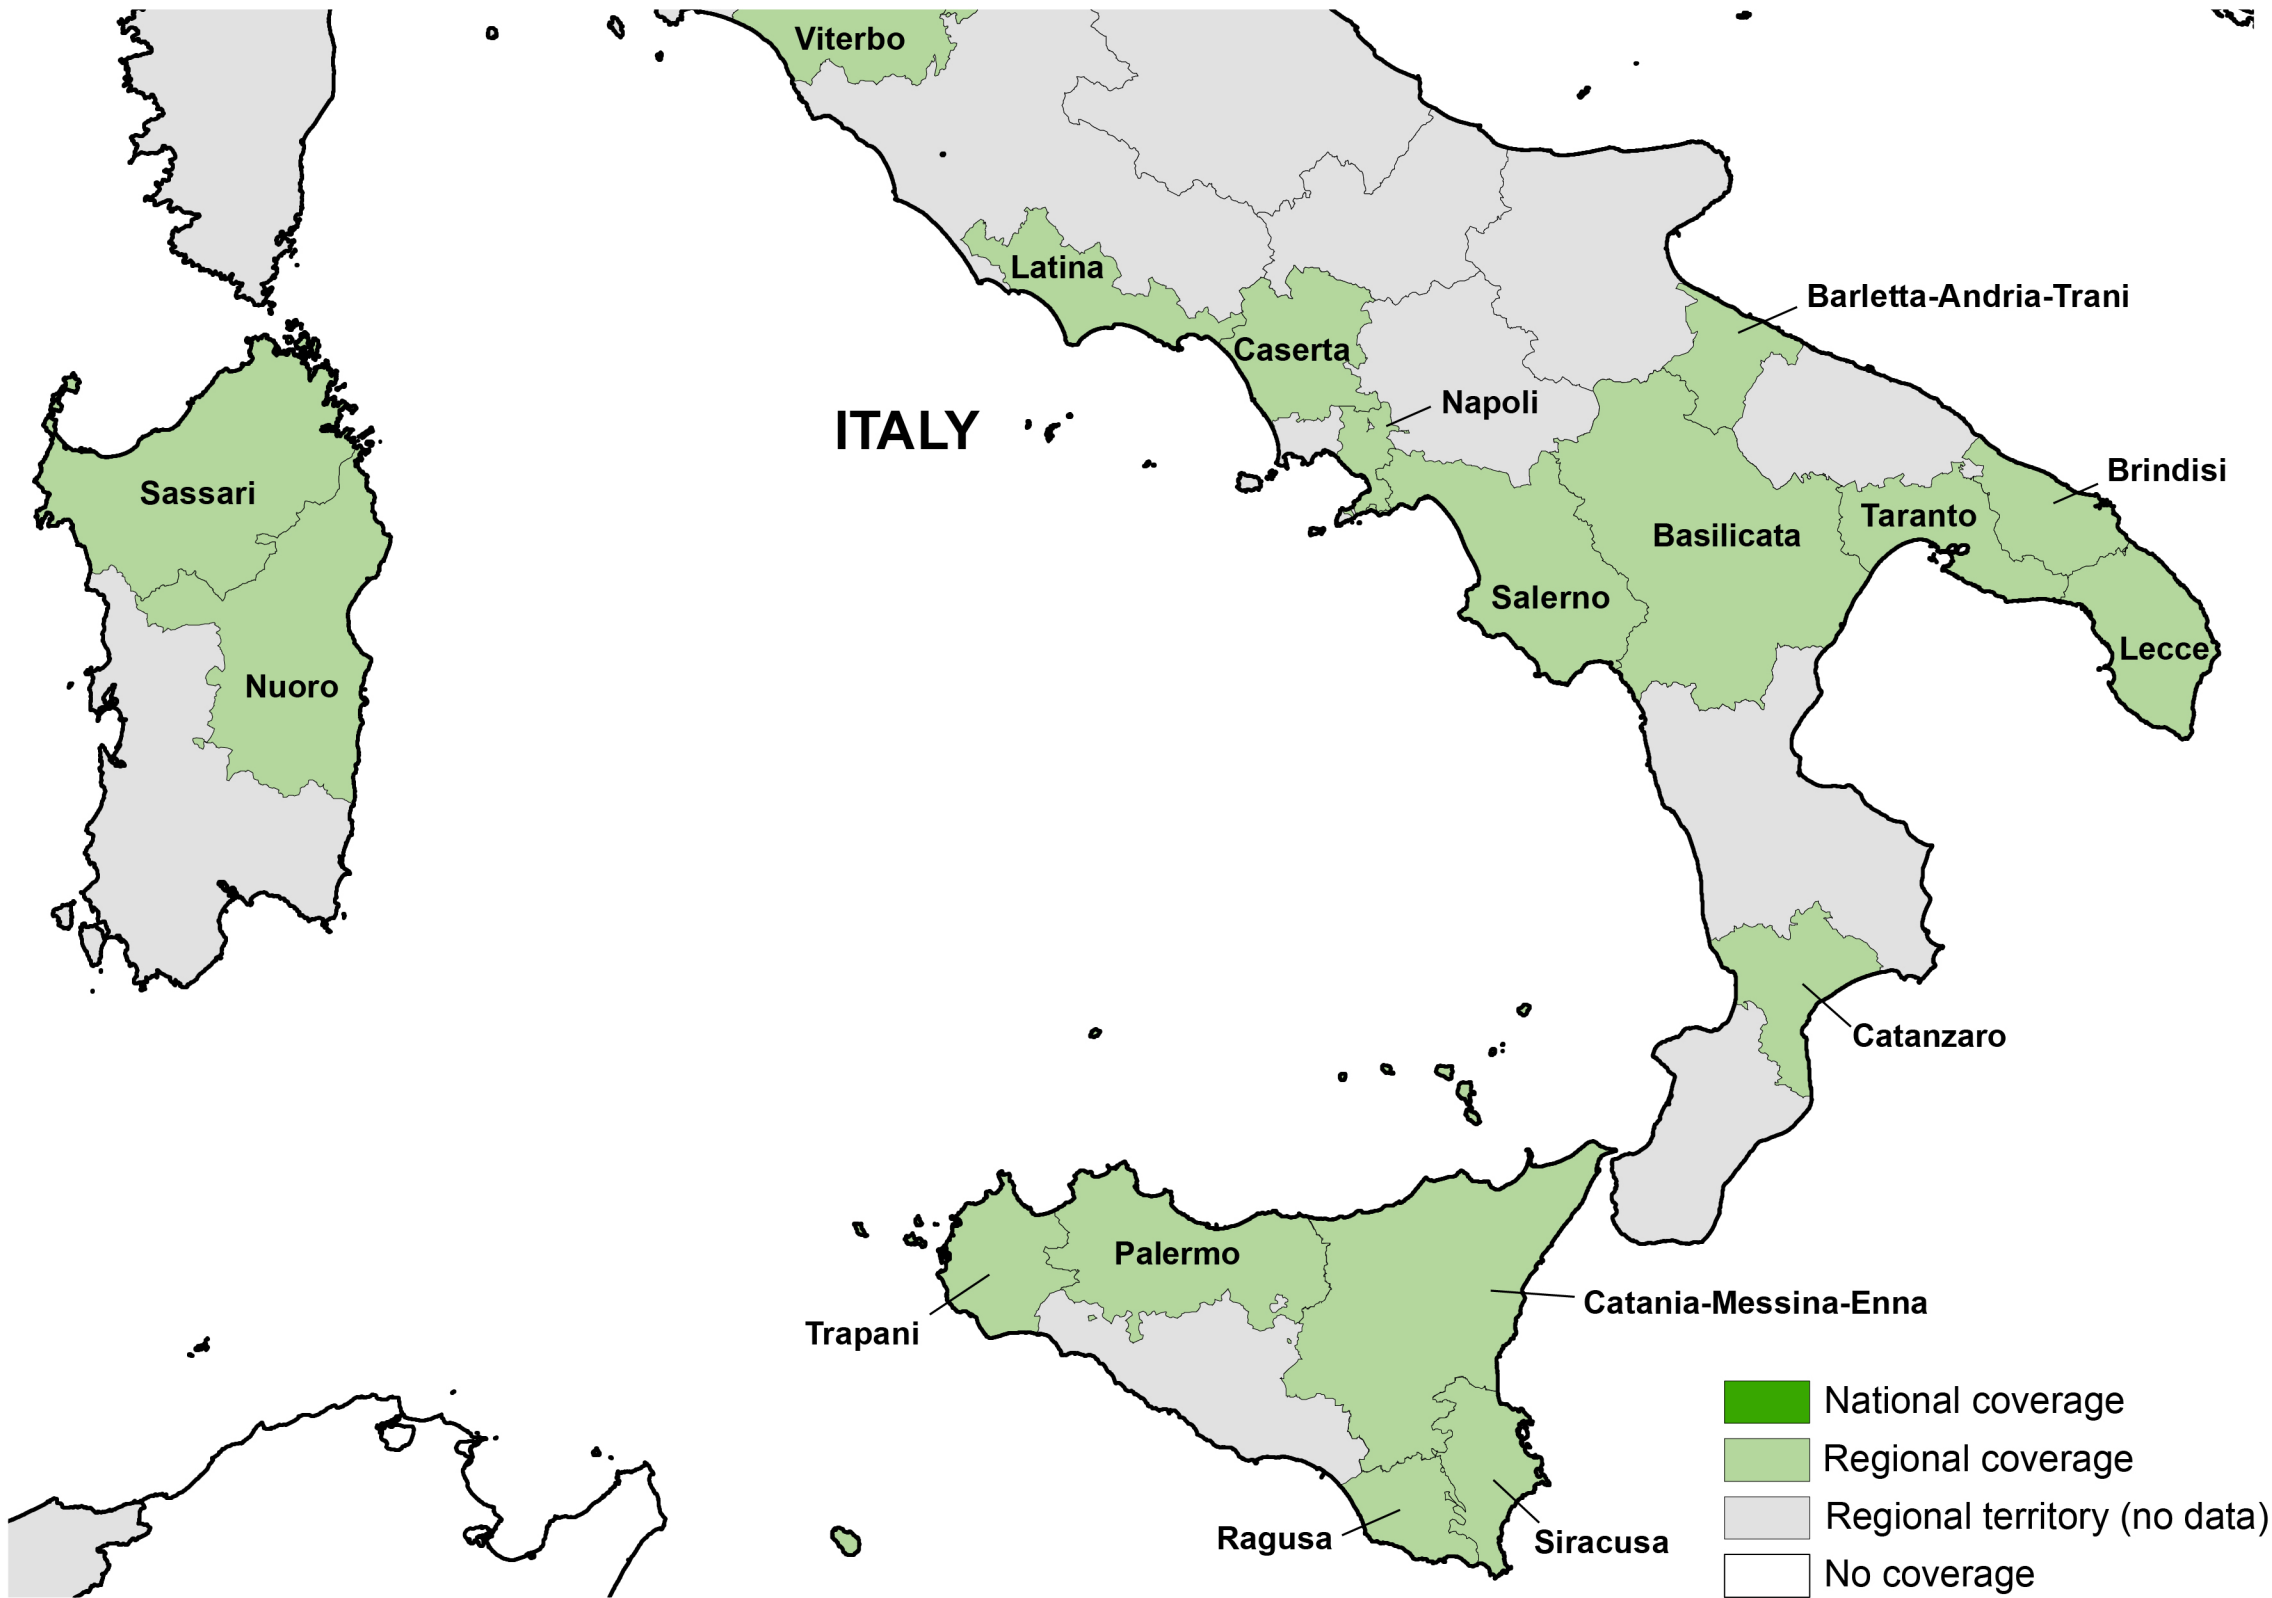

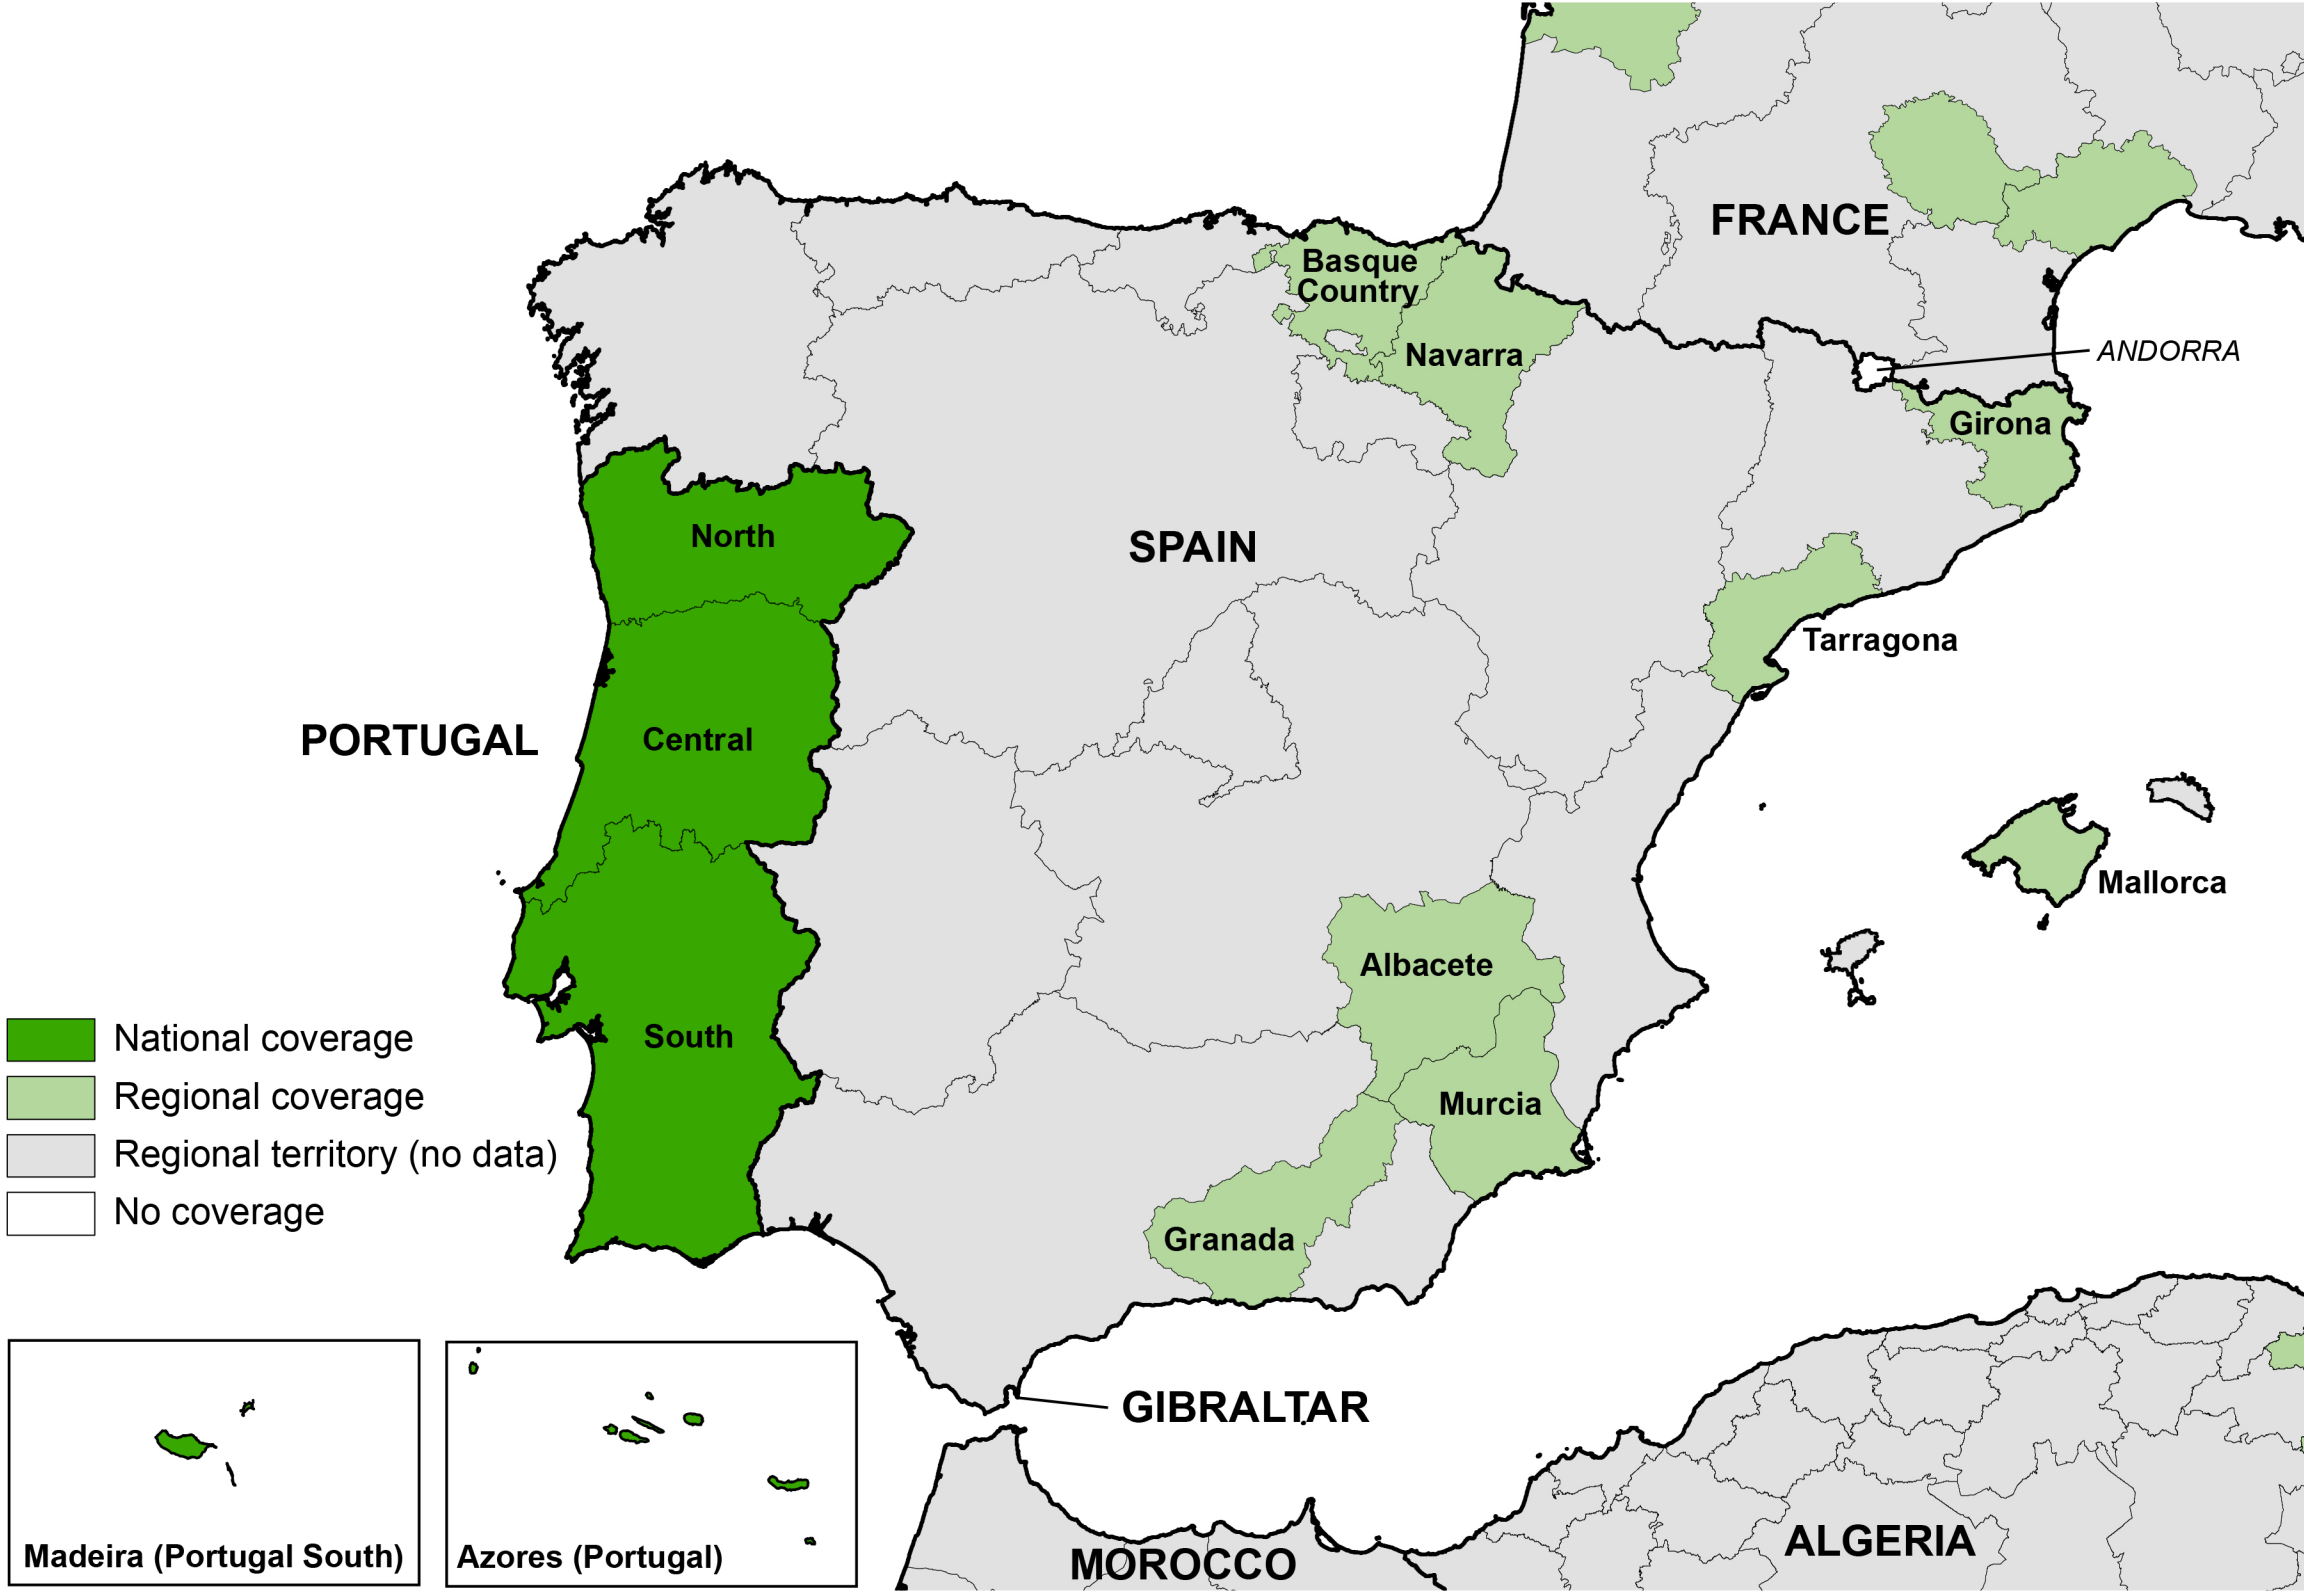

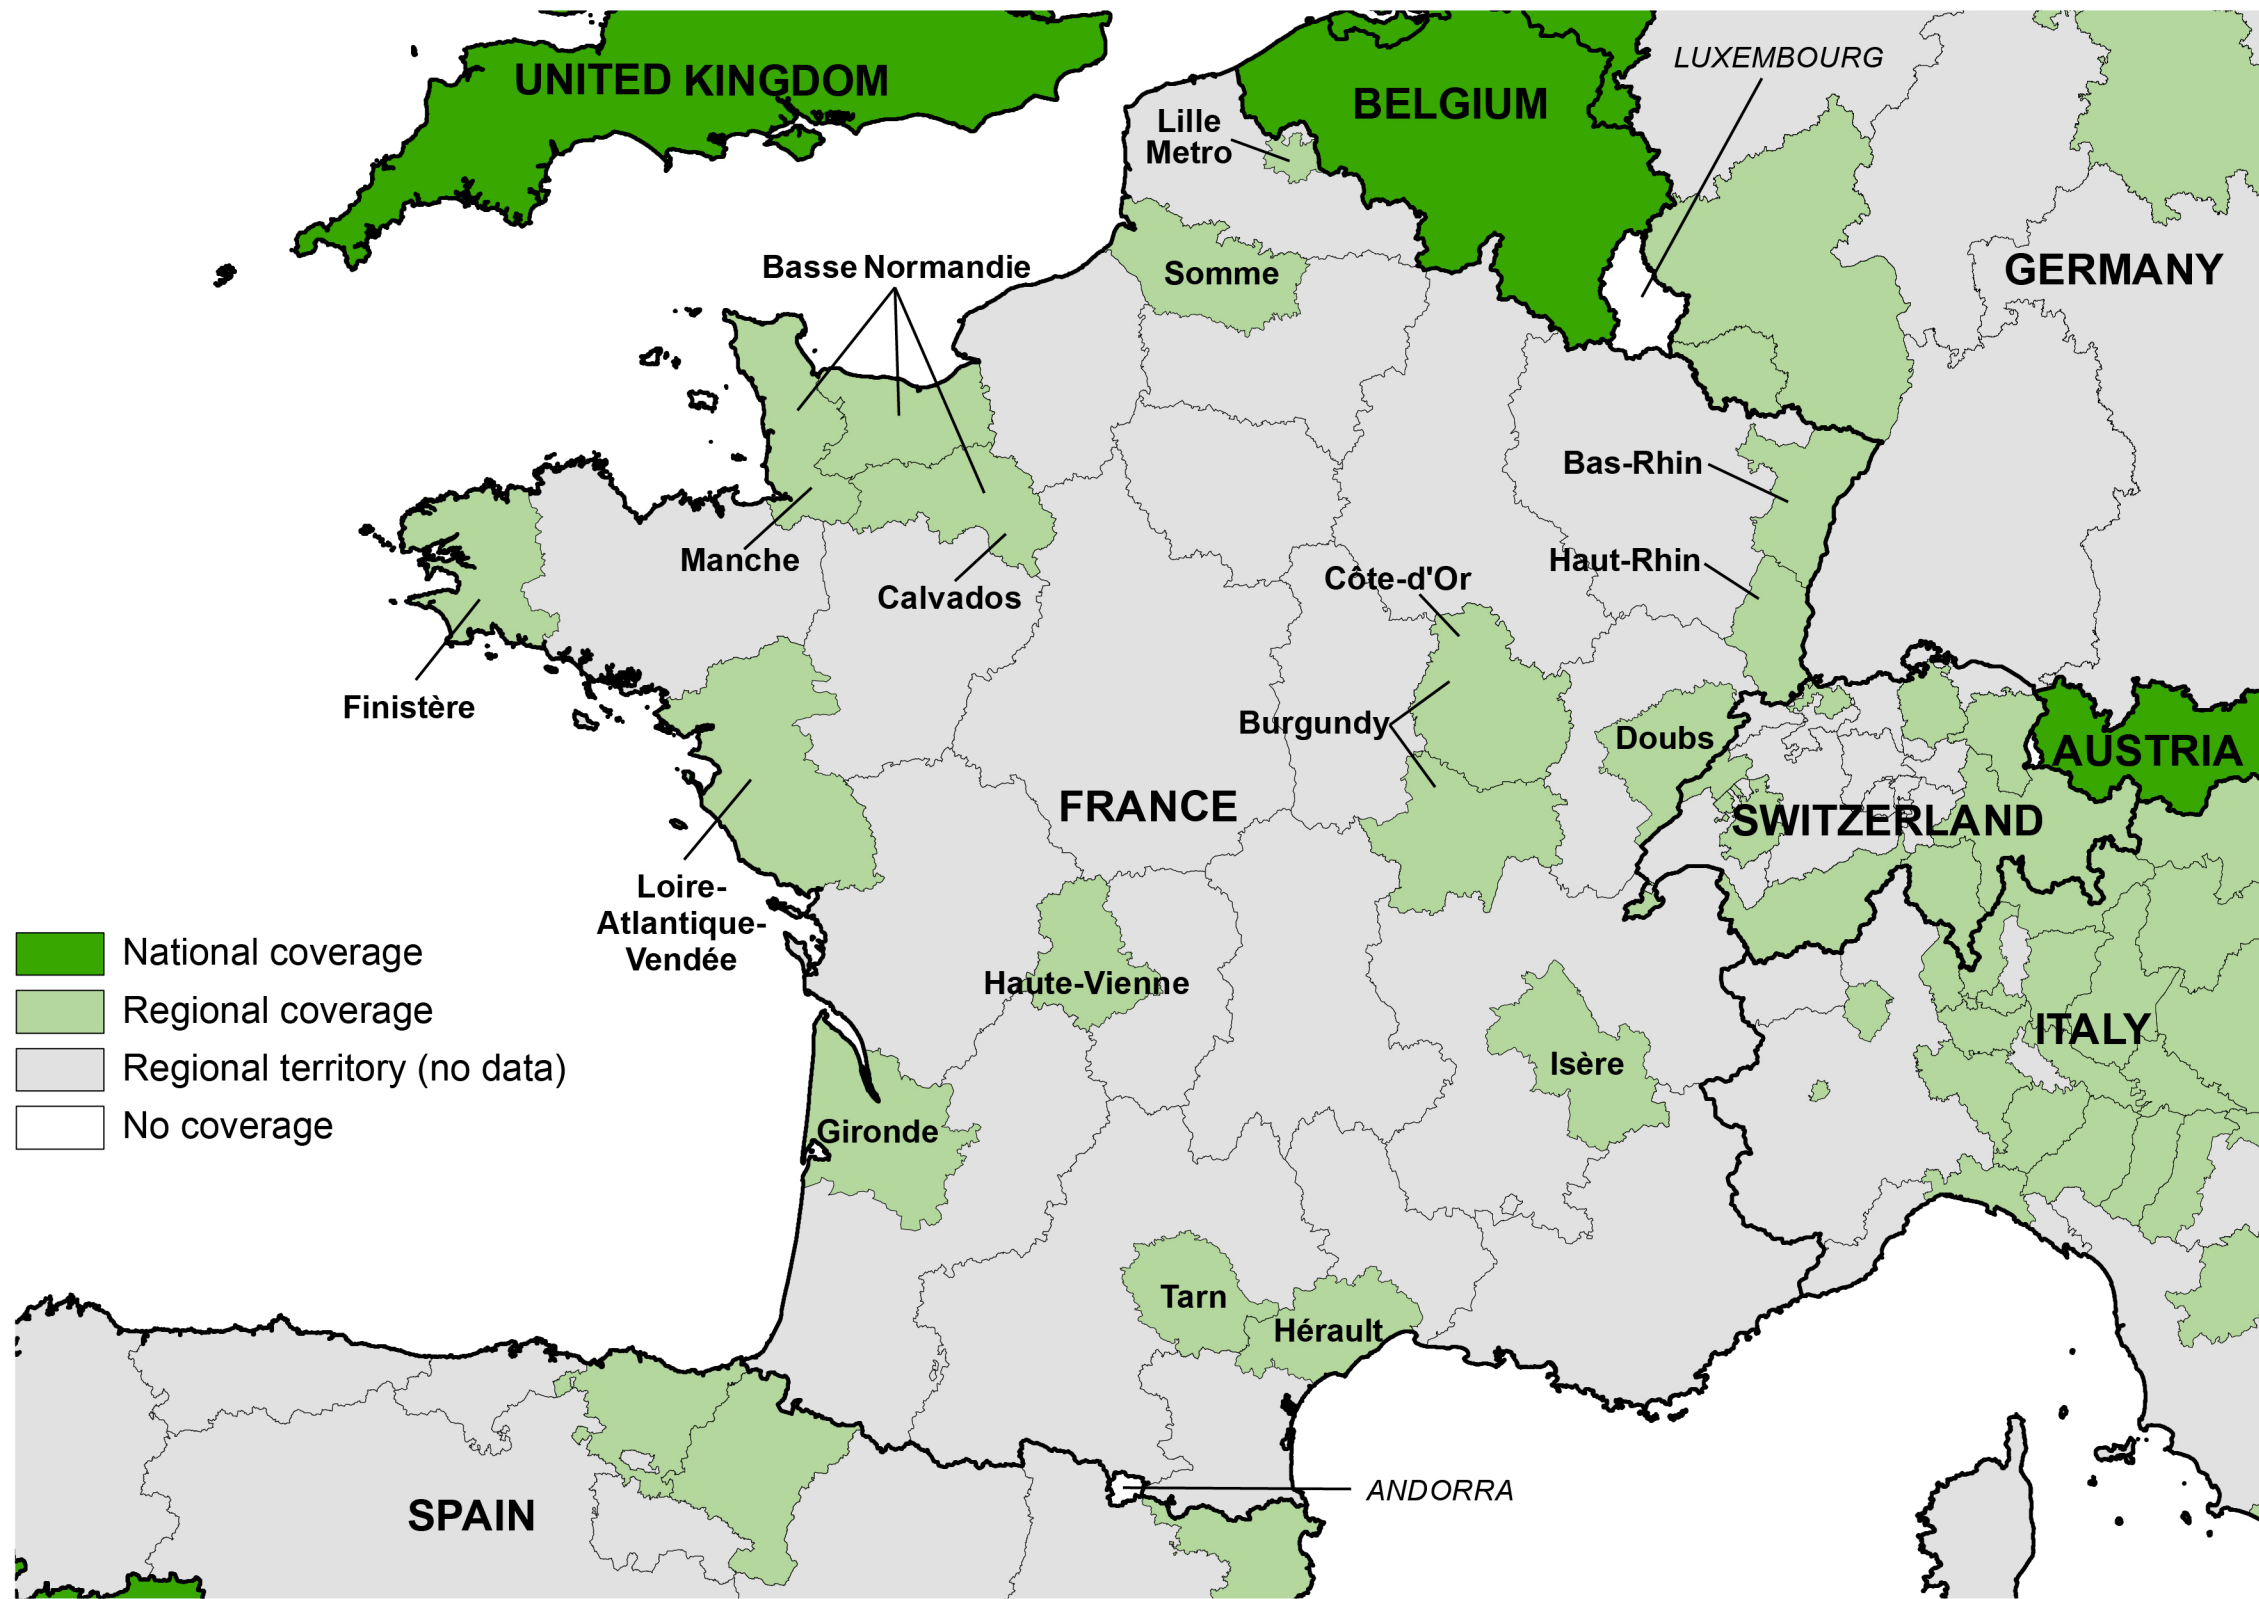

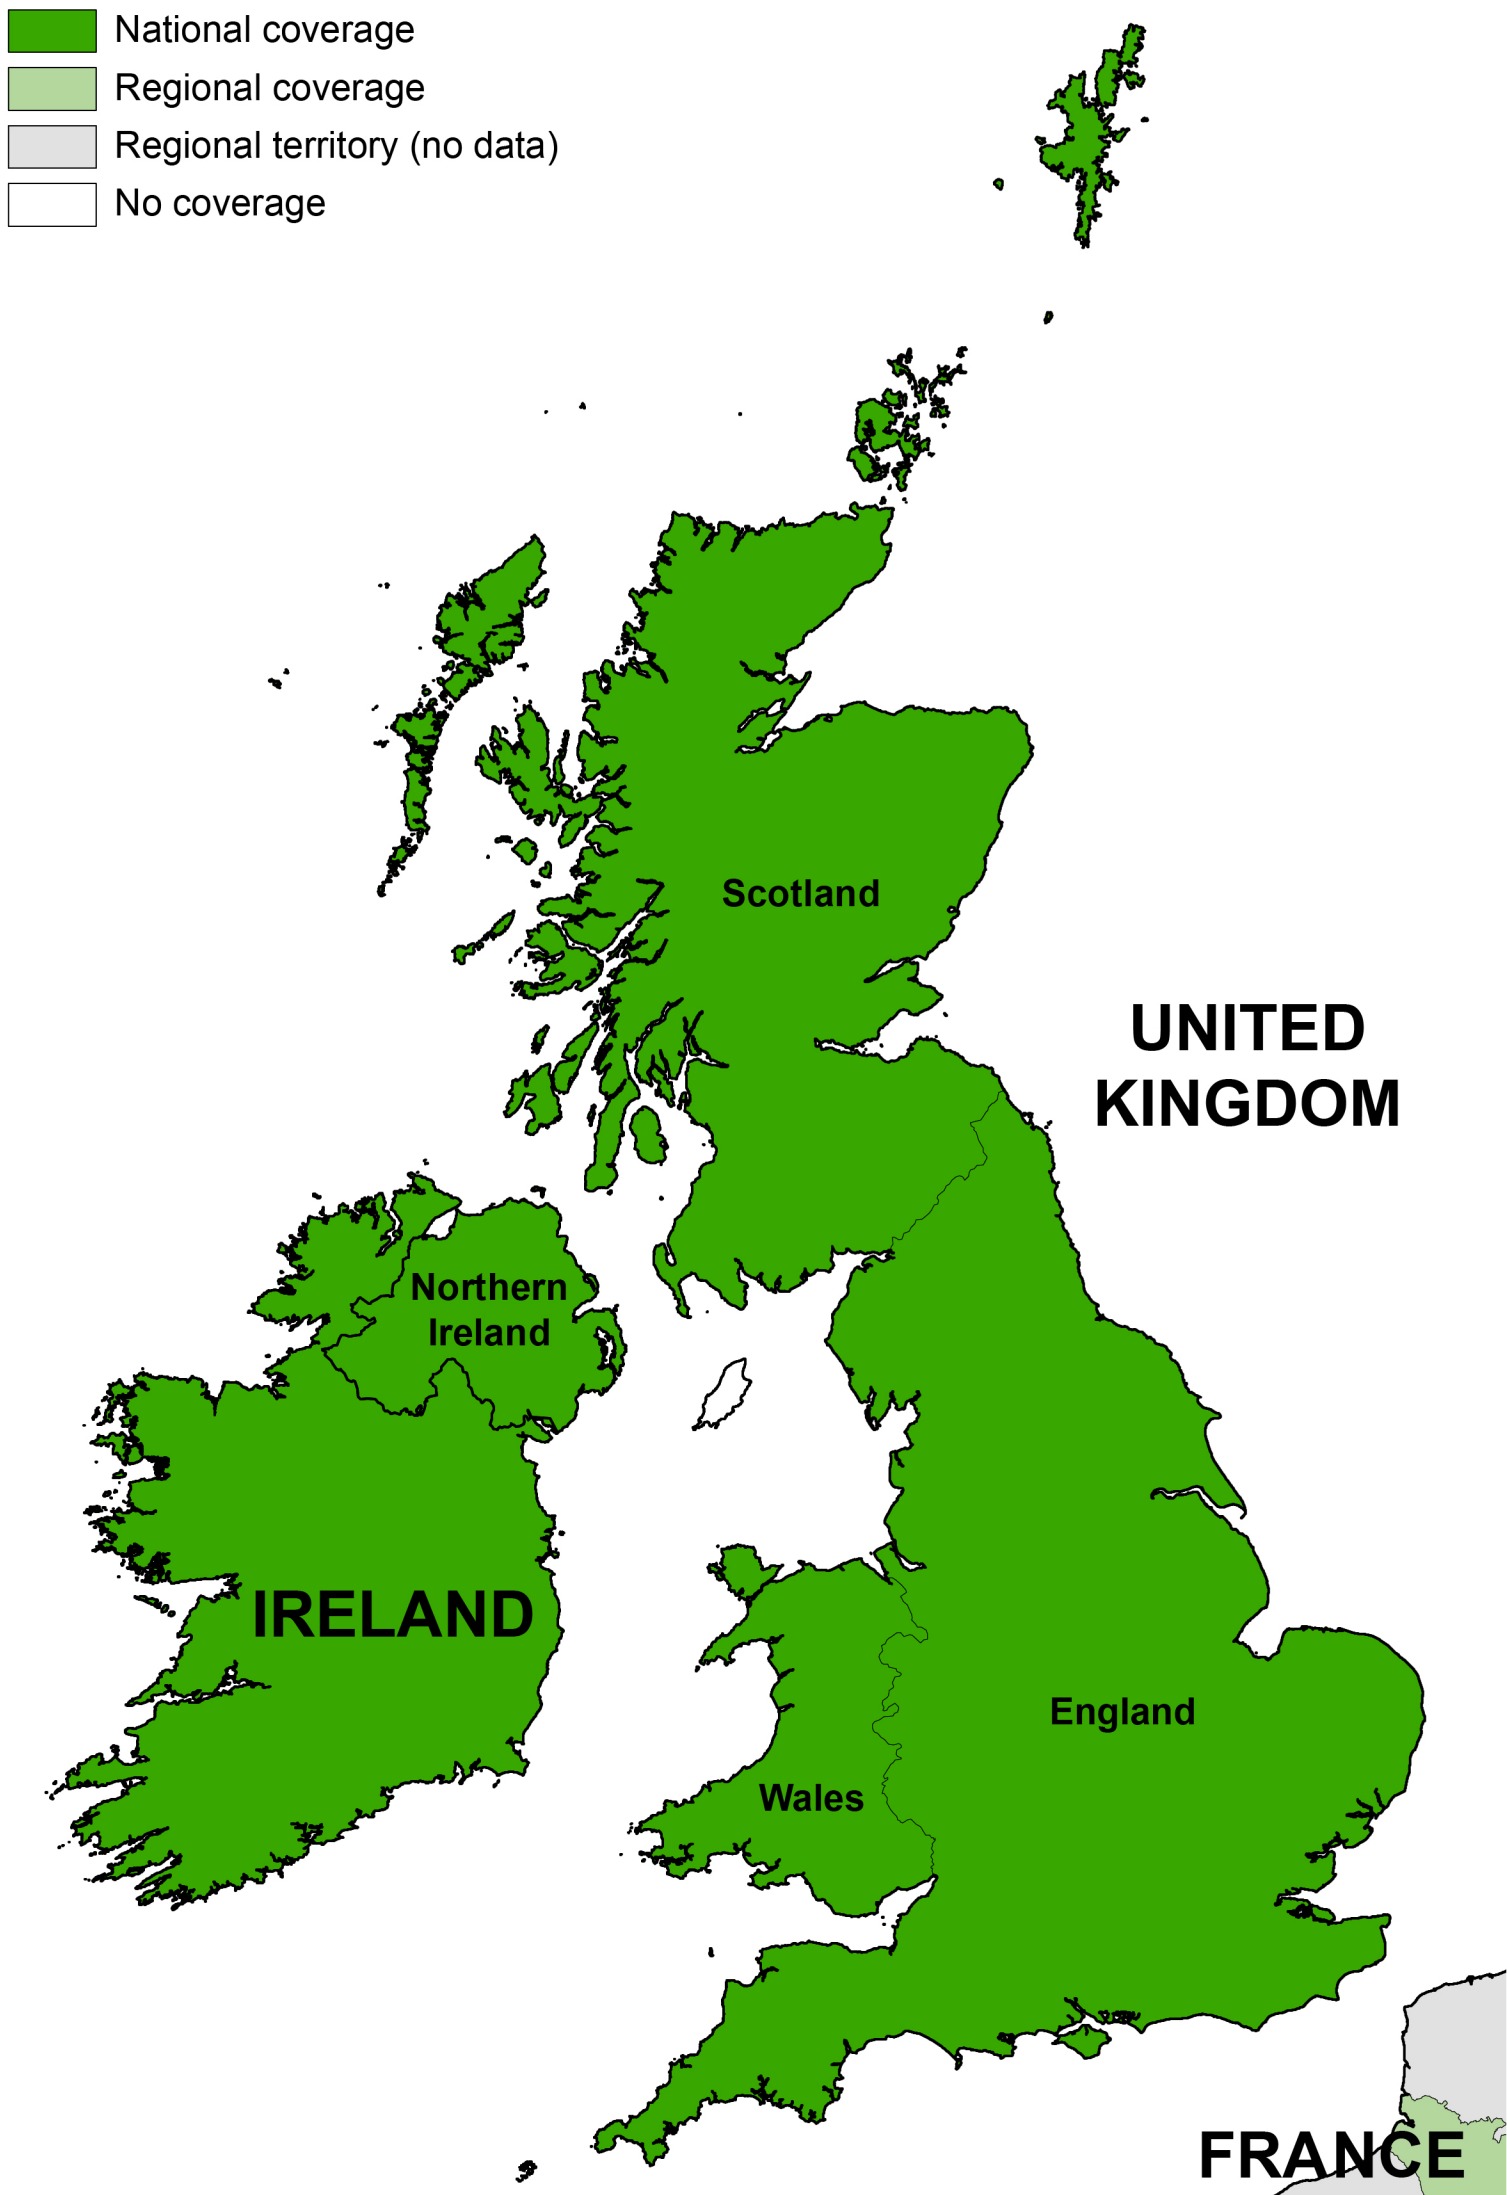

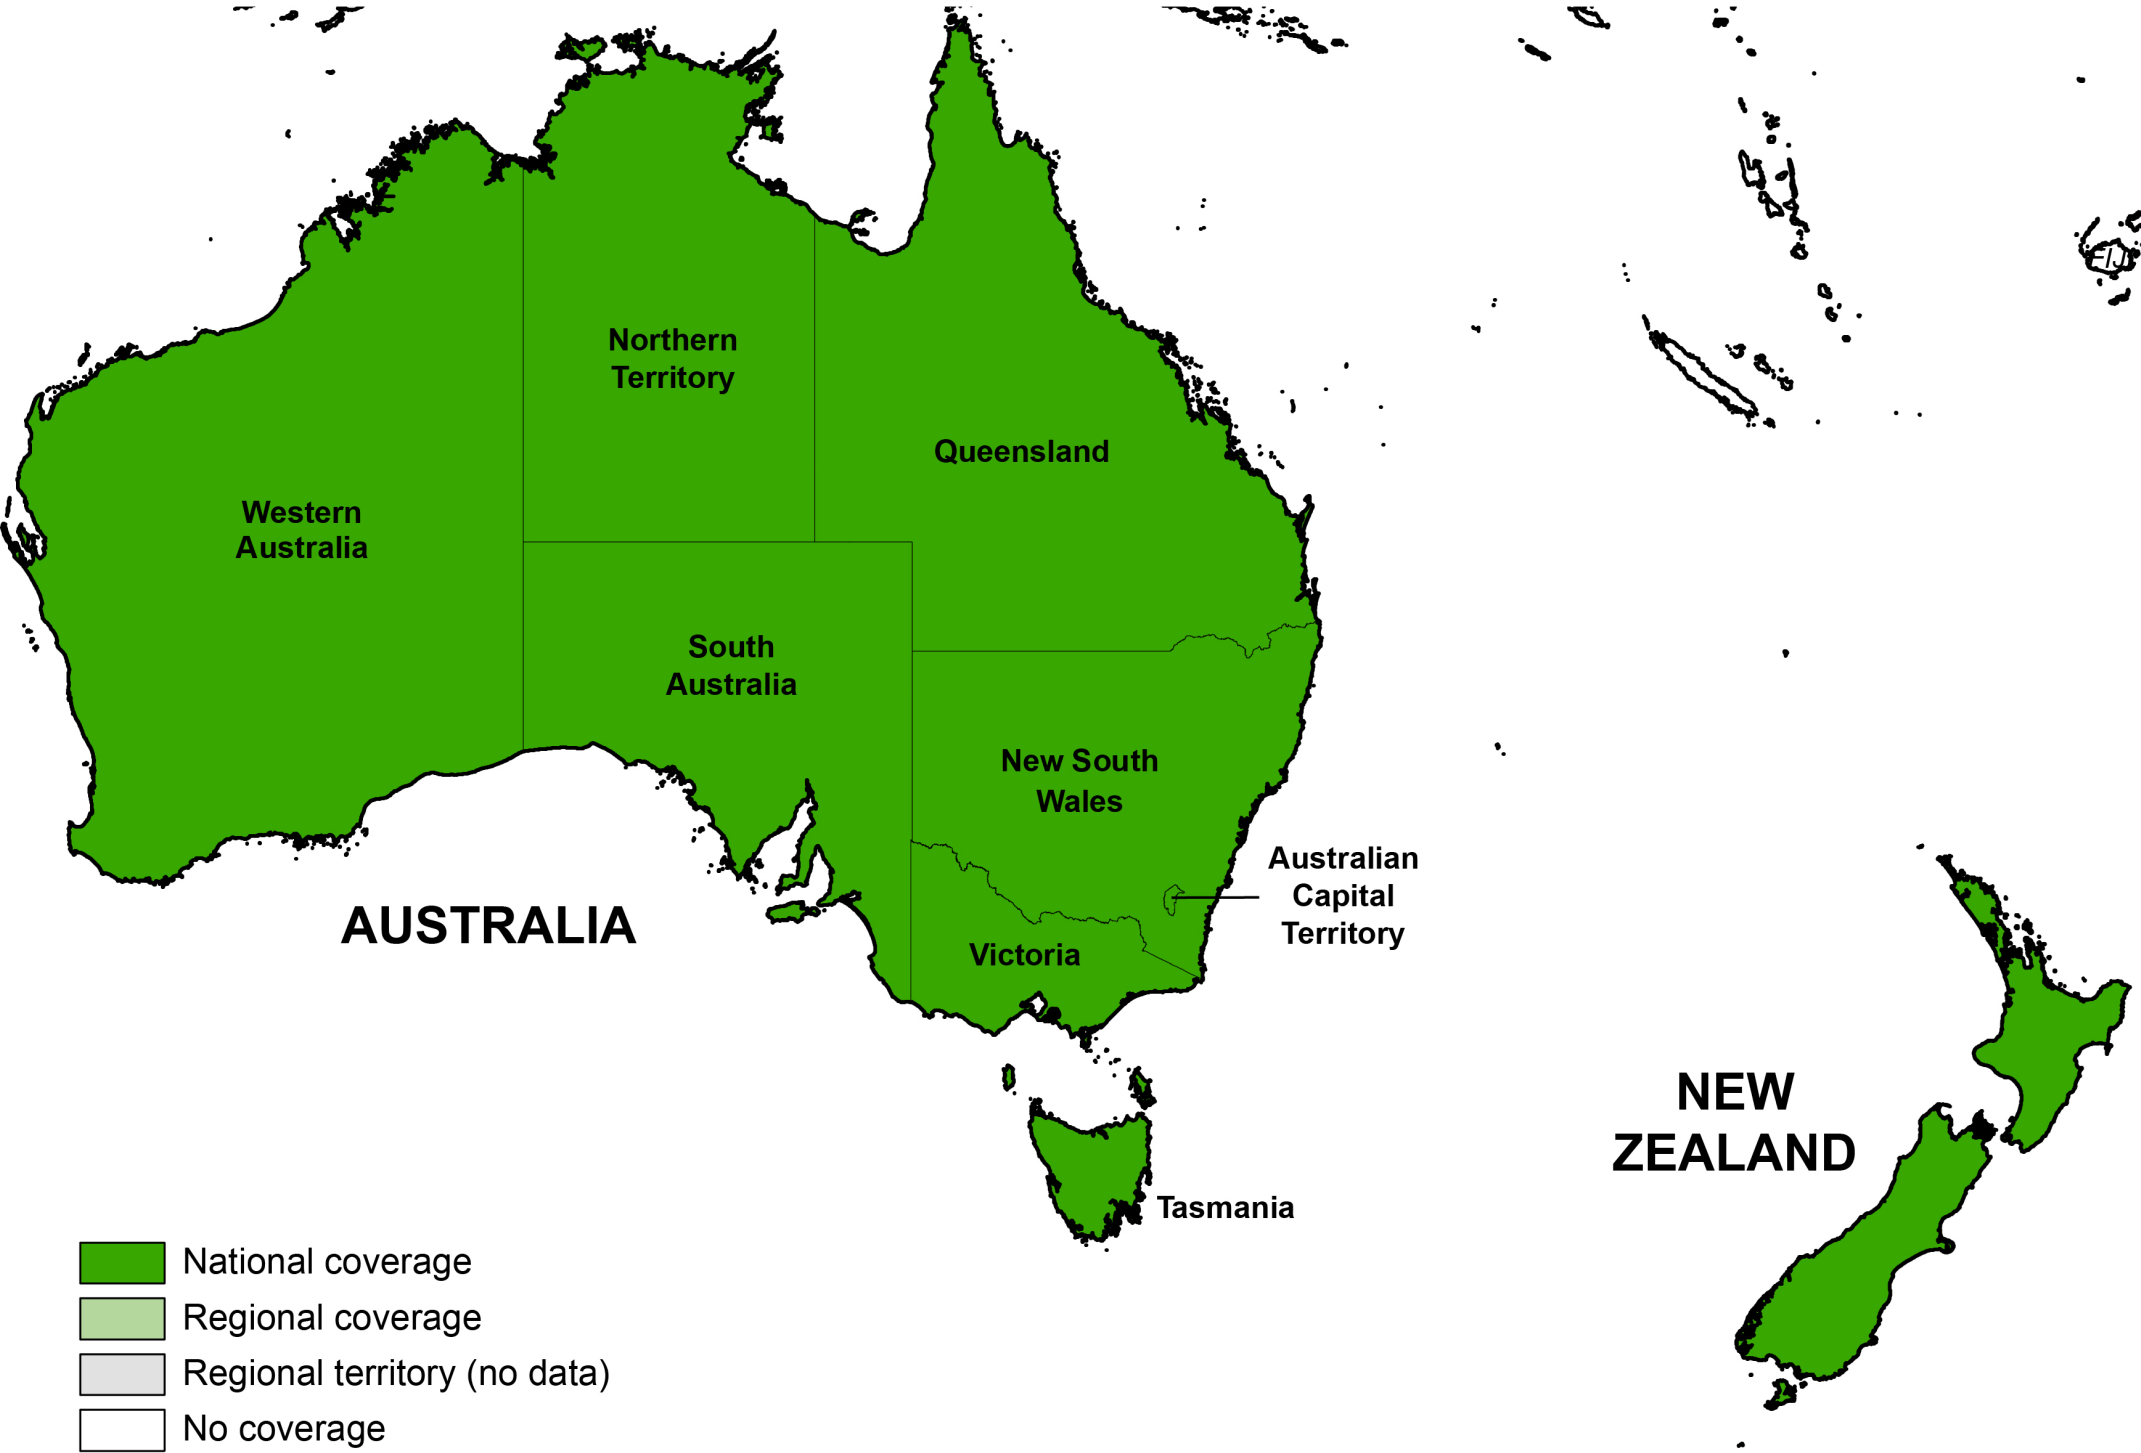

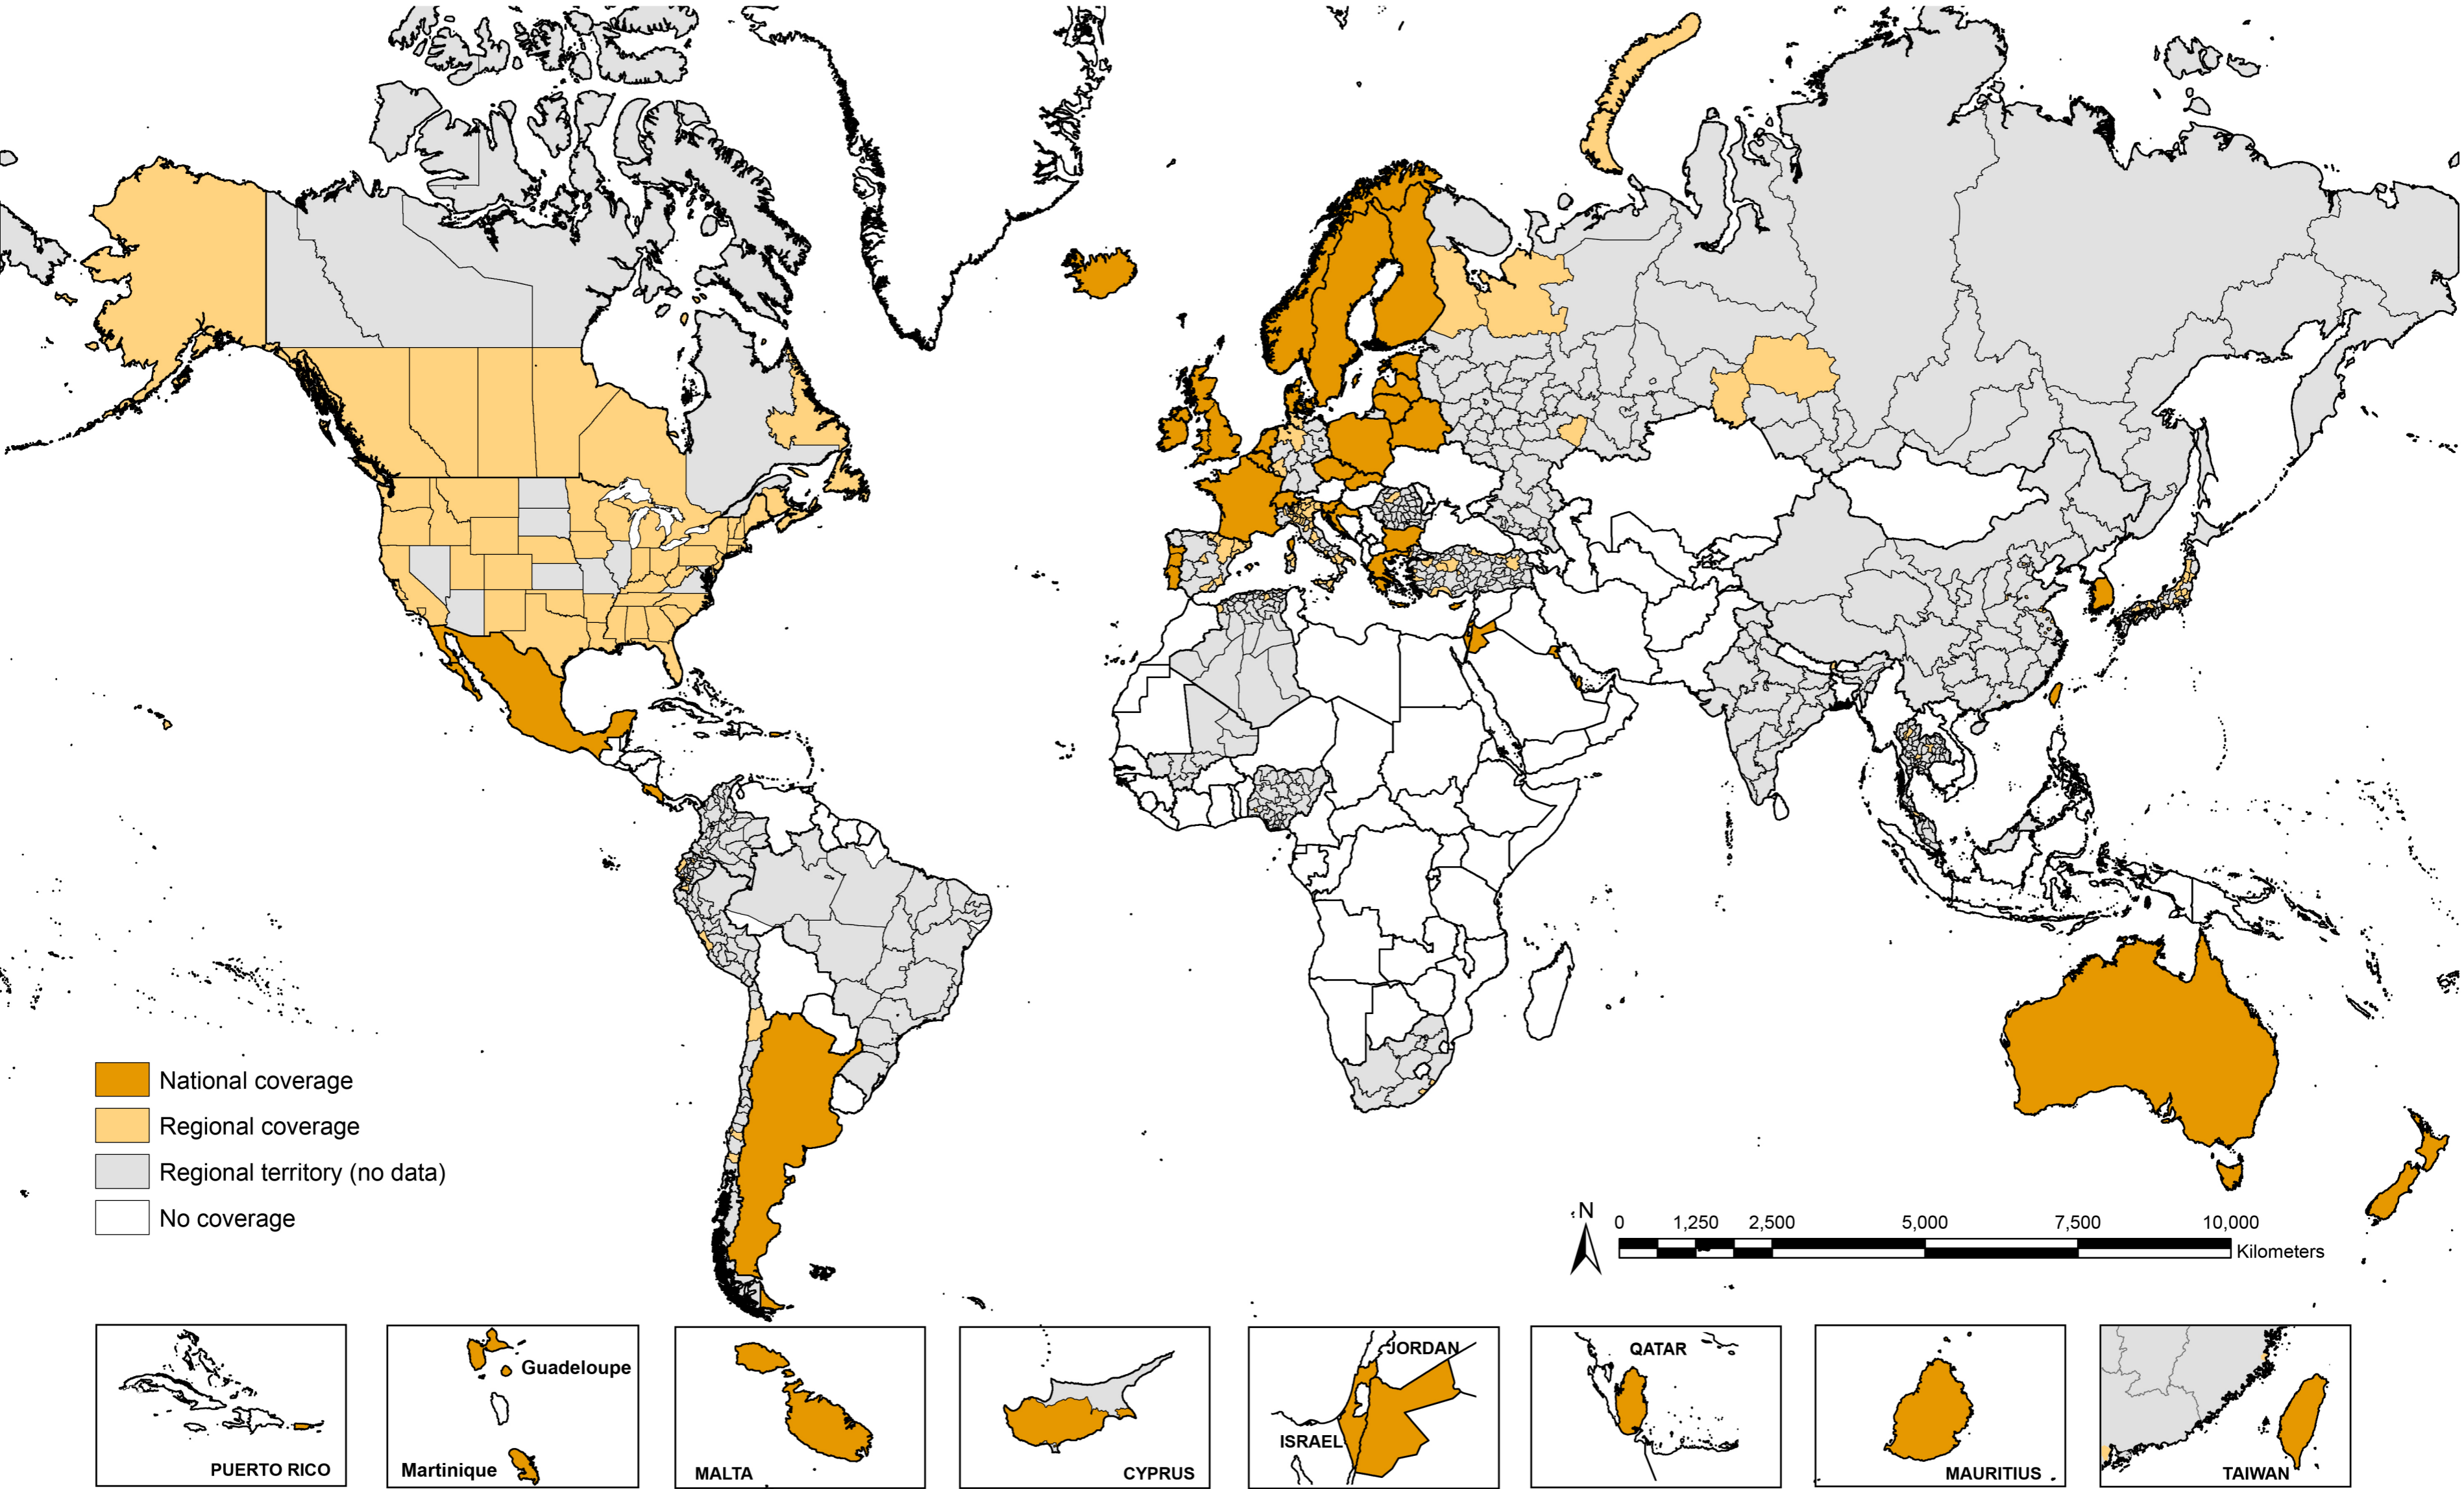

**Web-figure 2: Global distribution of age-standardised five-year net survival (%), adults (15-99 years) diagnosed with one of 15 common malignancies, and children (0-14 years) diagnosed with one of 3 common malignancies, by continent, country and period of diagnosis (2000-2004, 2005-2009, 2010-2014)**

**Adults**

|                 |                                                        |
|-----------------|--------------------------------------------------------|
| Web-figure 2.1  | Oesophagus                                             |
| Web-figure 2.2  | Stomach                                                |
| Web-figure 2.3  | Colon [also part of Figure 2 in main article]          |
| Web-figure 2.4  | Rectum                                                 |
| Web-figure 2.5  | Liver                                                  |
| Web-figure 2.6  | Pancreas                                               |
| Web-figure 2.7  | Lung                                                   |
| Web-figure 2.8  | Melanoma of the skin                                   |
| Web-figure 2.9  | Breast (women) [also part of Figure 2 in main article] |
| Web-figure 2.10 | Cervix                                                 |
| Web-figure 2.11 | Ovary                                                  |
| Web-figure 2.12 | Prostate                                               |
| Web-figure 2.13 | Brain tumours                                          |
| Web-figure 2.14 | Myeloid malignancies                                   |
| Web-figure 2.15 | Lymphoid malignancies                                  |

**Children**

|                 |                                                                  |
|-----------------|------------------------------------------------------------------|
| Web-figure 2.16 | Brain tumours                                                    |
| Web-figure 2.17 | Acute lymphoblastic leukaemia [part of Figure 2 in main article] |
| Web-figure 2.18 | Lymphomas                                                        |

Survival estimates for each country are ranked from highest to lowest within each continent. For ease of reference, the ranking of countries for 2010-2014 is also used for 2000-2004 and 2005-2009. Where data were available for more than one registry in a given country, the survival estimates are derived by pooling the data for that country, but excluding data from registries for which the estimates are considered less reliable (see text).

\* Data with 100% coverage of the national population.

† National estimate not age-standardised.

§ National estimate flagged as less reliable because the only available estimates are from a registry or registries in this category.

**Web-figure 2.1: Oesophageal cancer** – Global distribution of age-standardised five-year net survival (%) in adults (15-99 years), by continent, country Back and calendar period of diagnosis

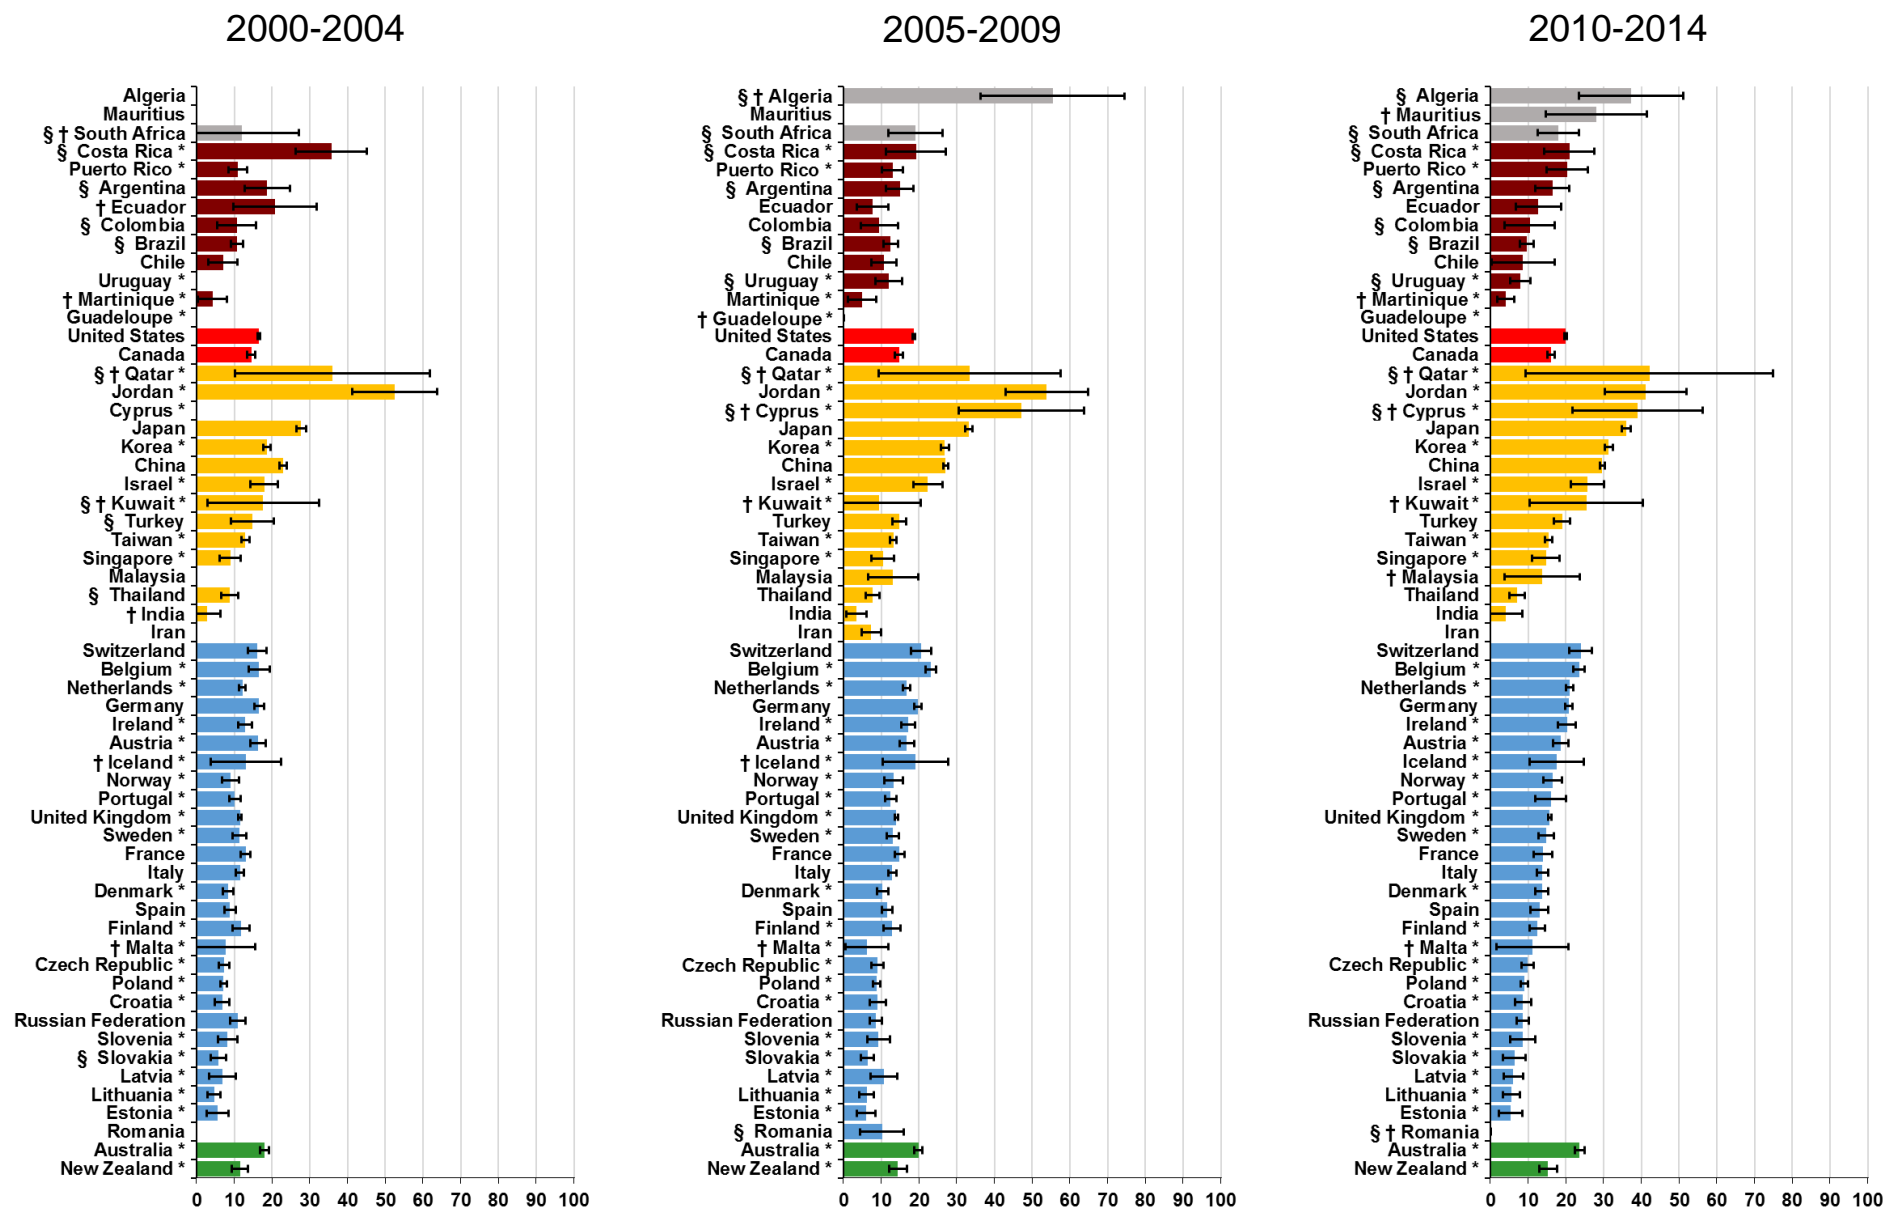

**Web-figure 2.2: Stomach cancer** – Global distribution of age-standardised five-year net survival (%) in adults (15-99 years), by continent, country and calendar period of diagnosis Back

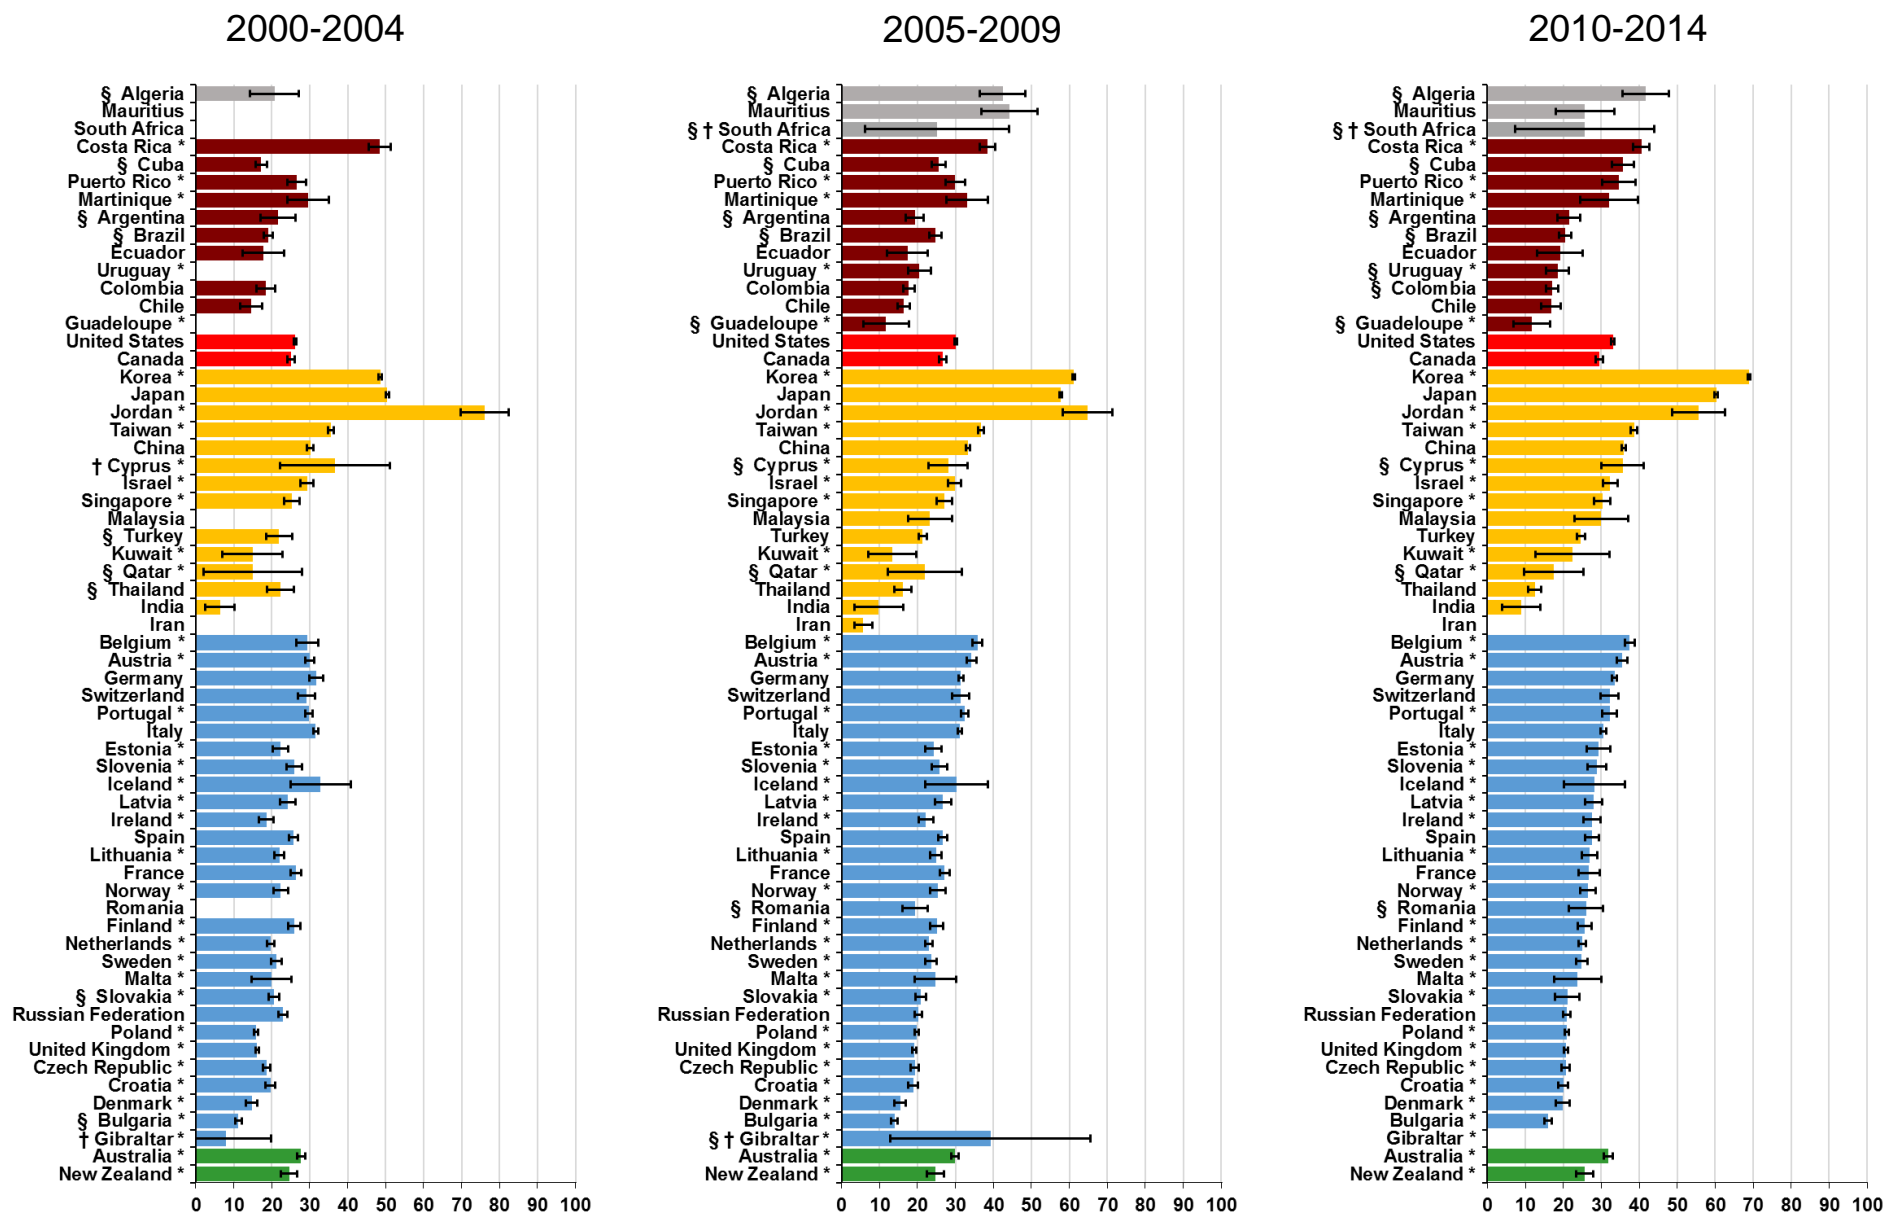

Web-figure 2.3: Colon cancer – Global distribution of age-standardised five-year net survival (%) in adults (15-99 years), by continent, country and calendar period of diagnosis

Back

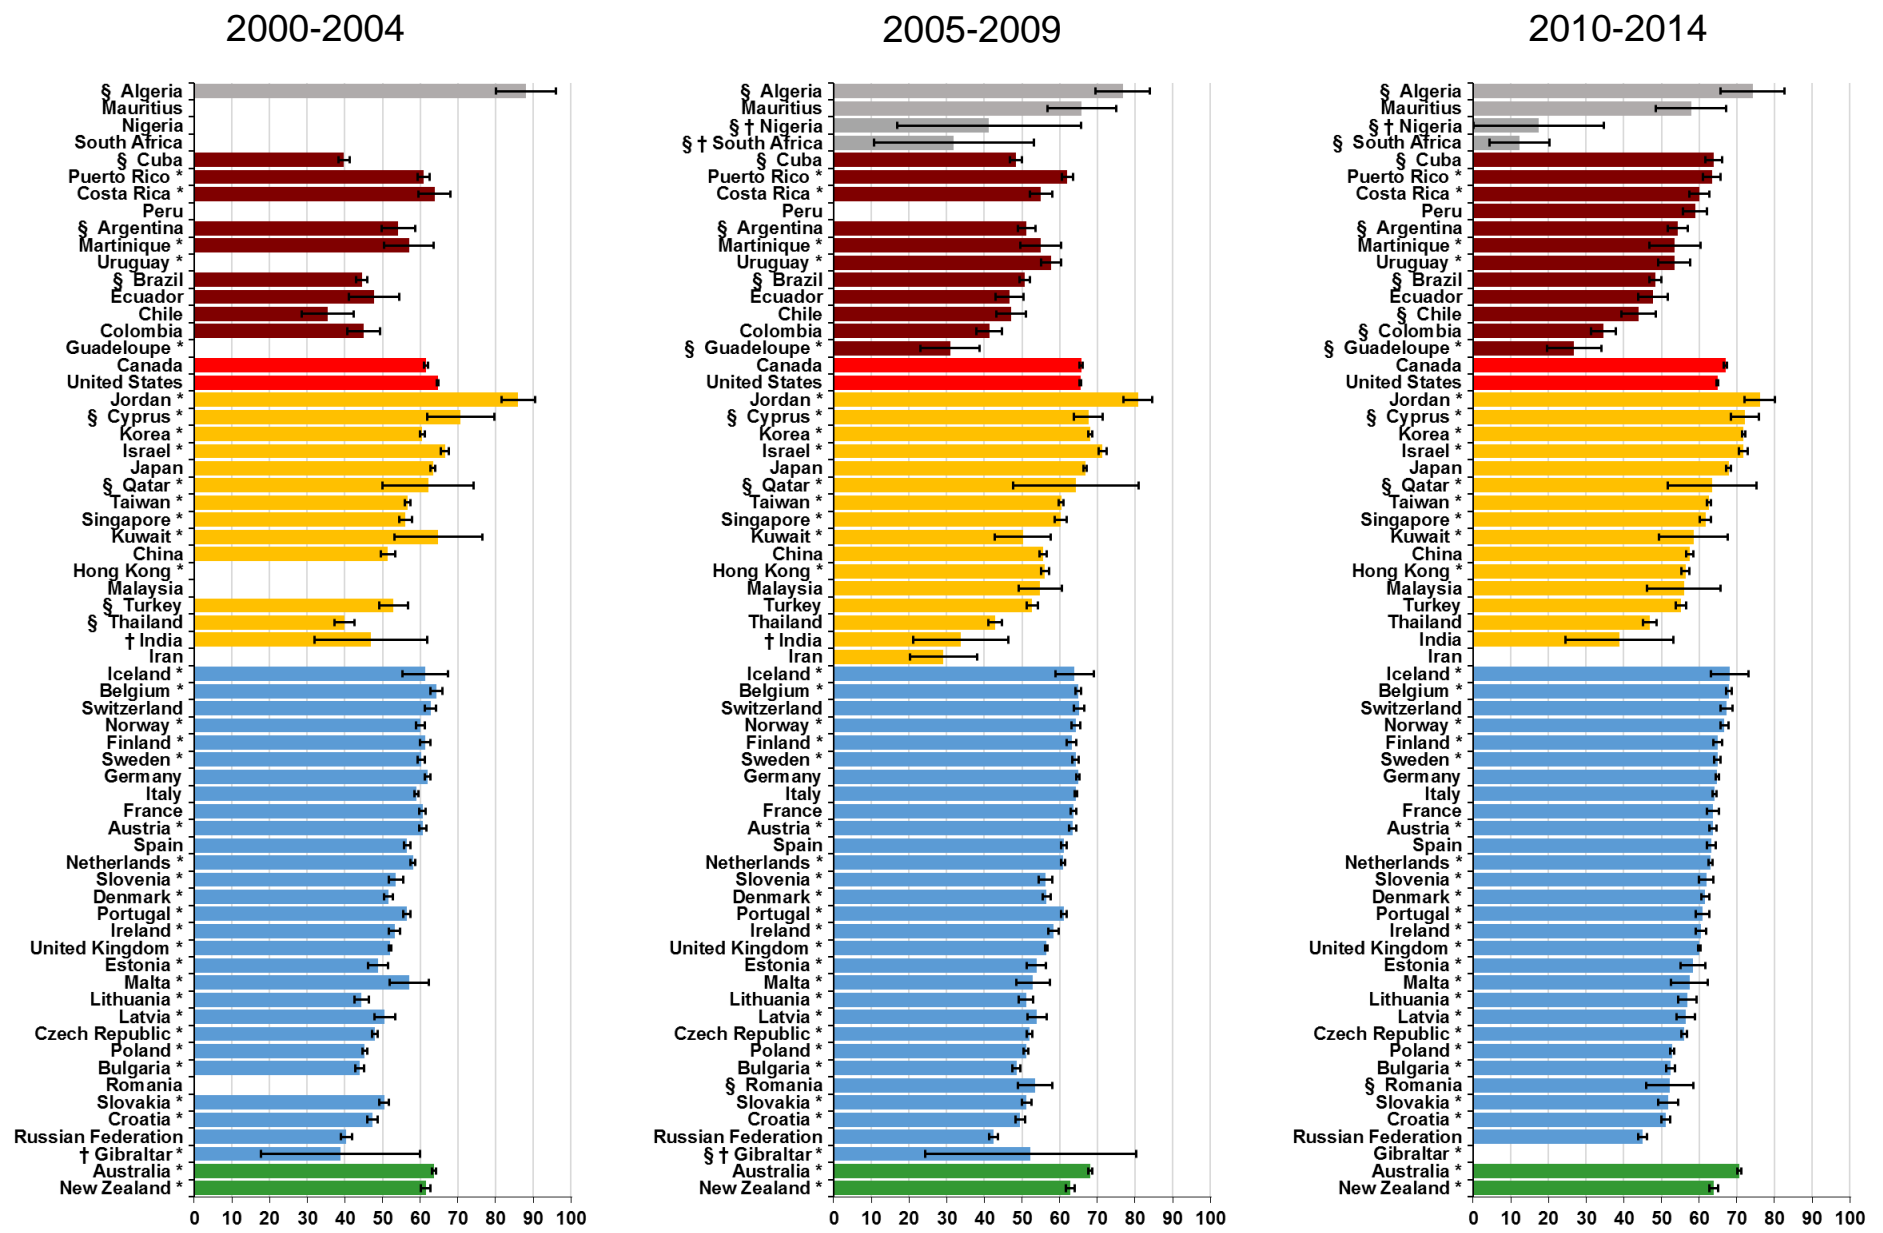

Web-figure 2.4: Rectal cancer – Global distribution of age-standardised five-year net survival (%) in adults (15-99 years), by continent, country and calendar period of diagnosis

Back

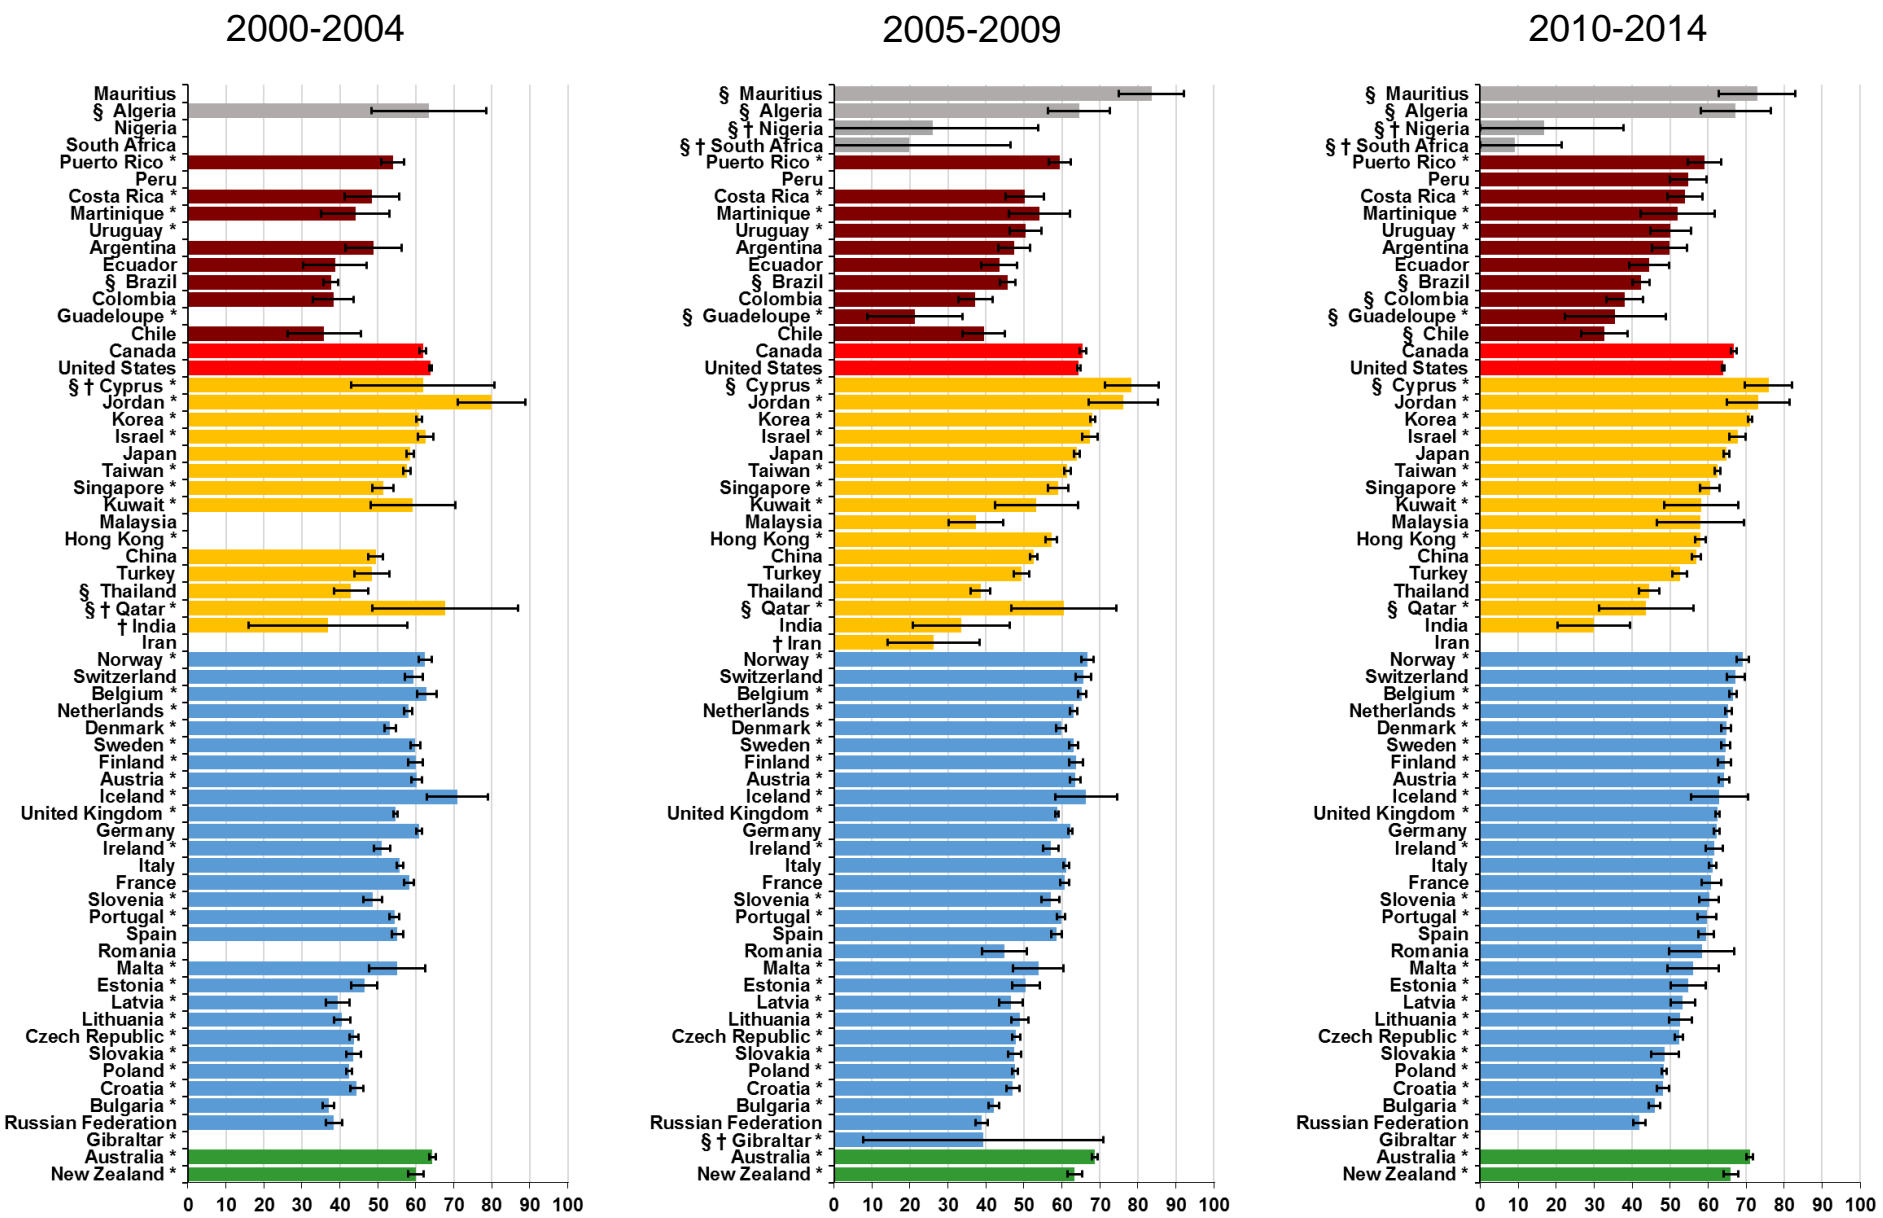

Web-figure 2.5: Liver cancer – Global distribution of age-standardised five-year net survival (%) in adults (15-99 years), by continent, country and calendar period of diagnosis

Back

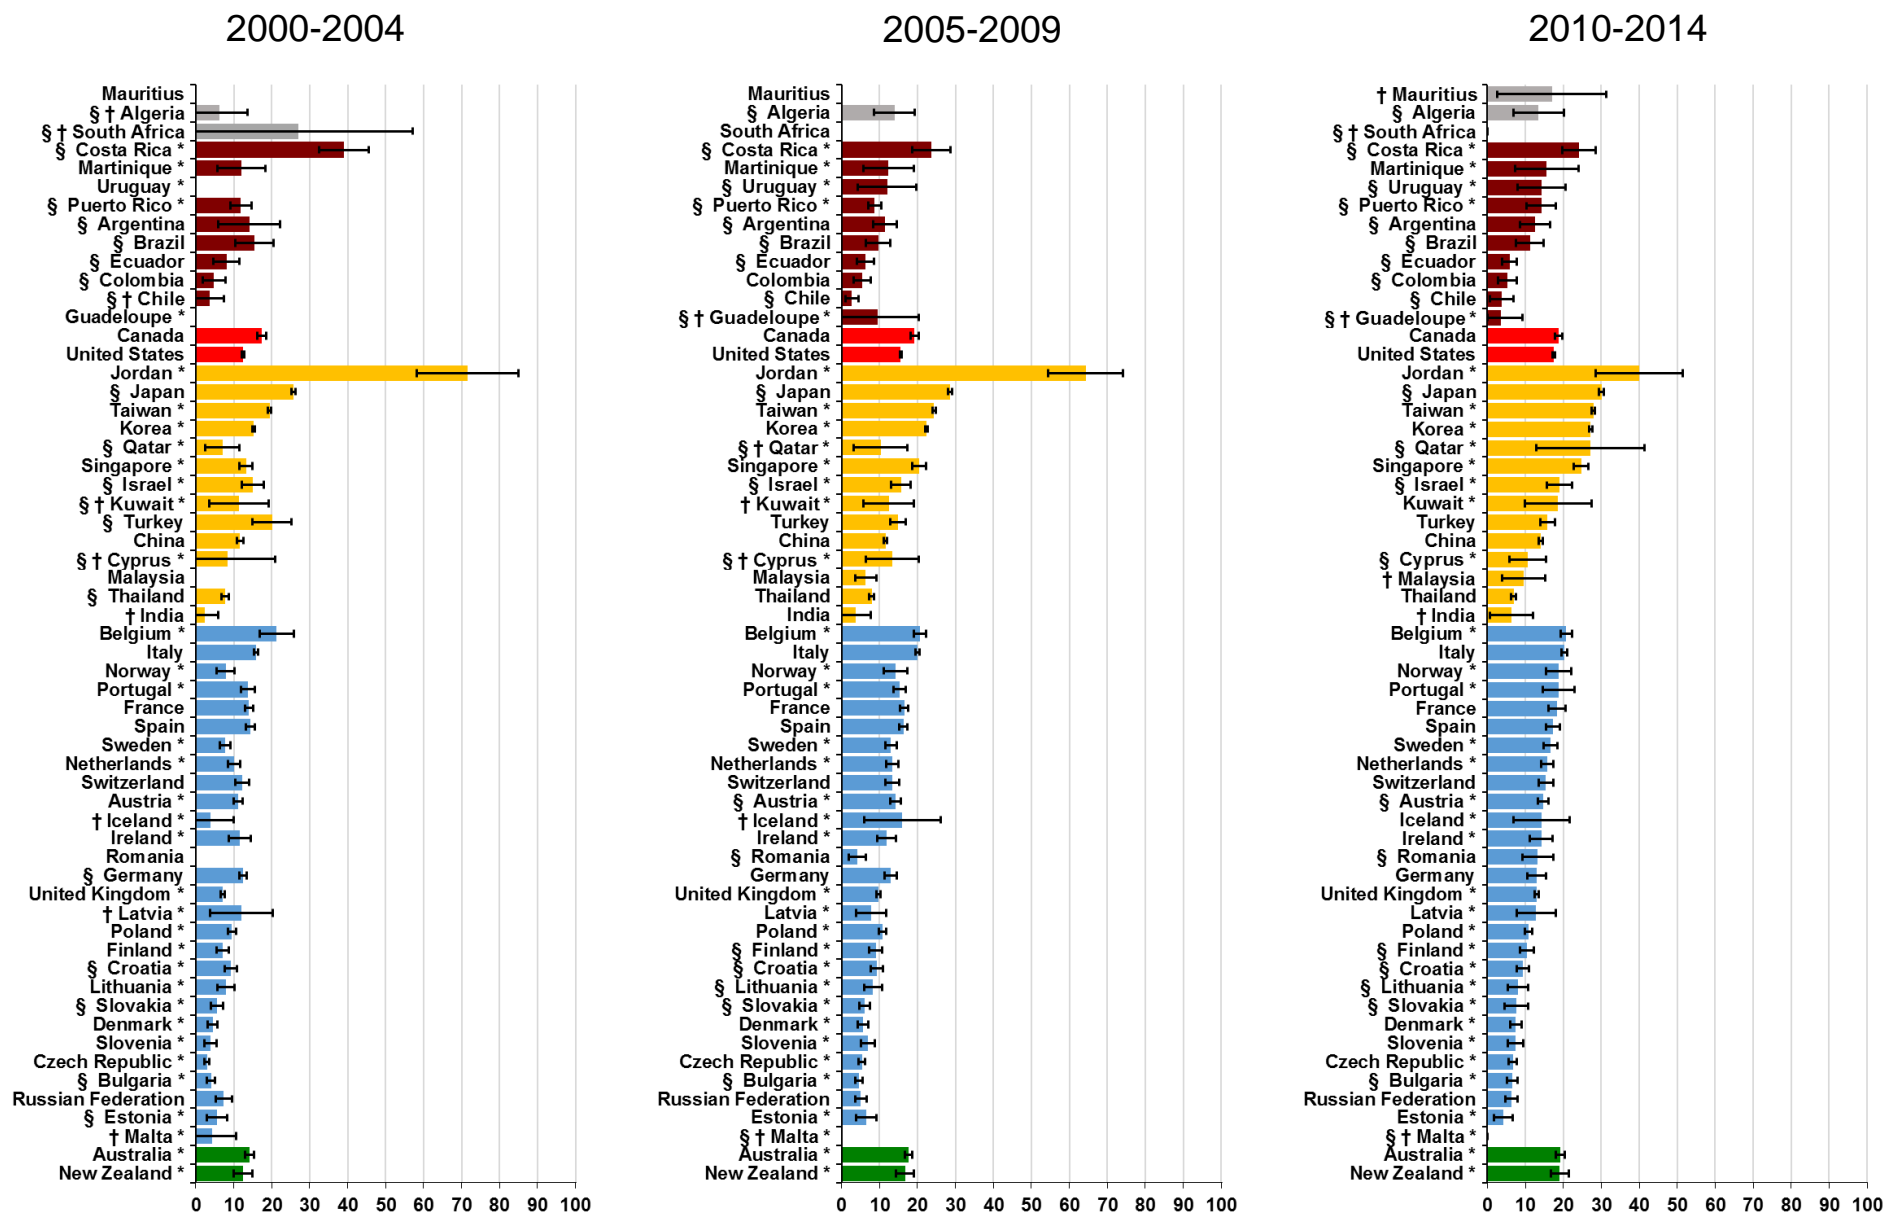

**Web-figure 2.6: Pancreatic cancer** – Global distribution of age-standardised five-year net survival (%) in adults (15-99 years), by continent, country and calendar period of diagnosis

[Back](#)

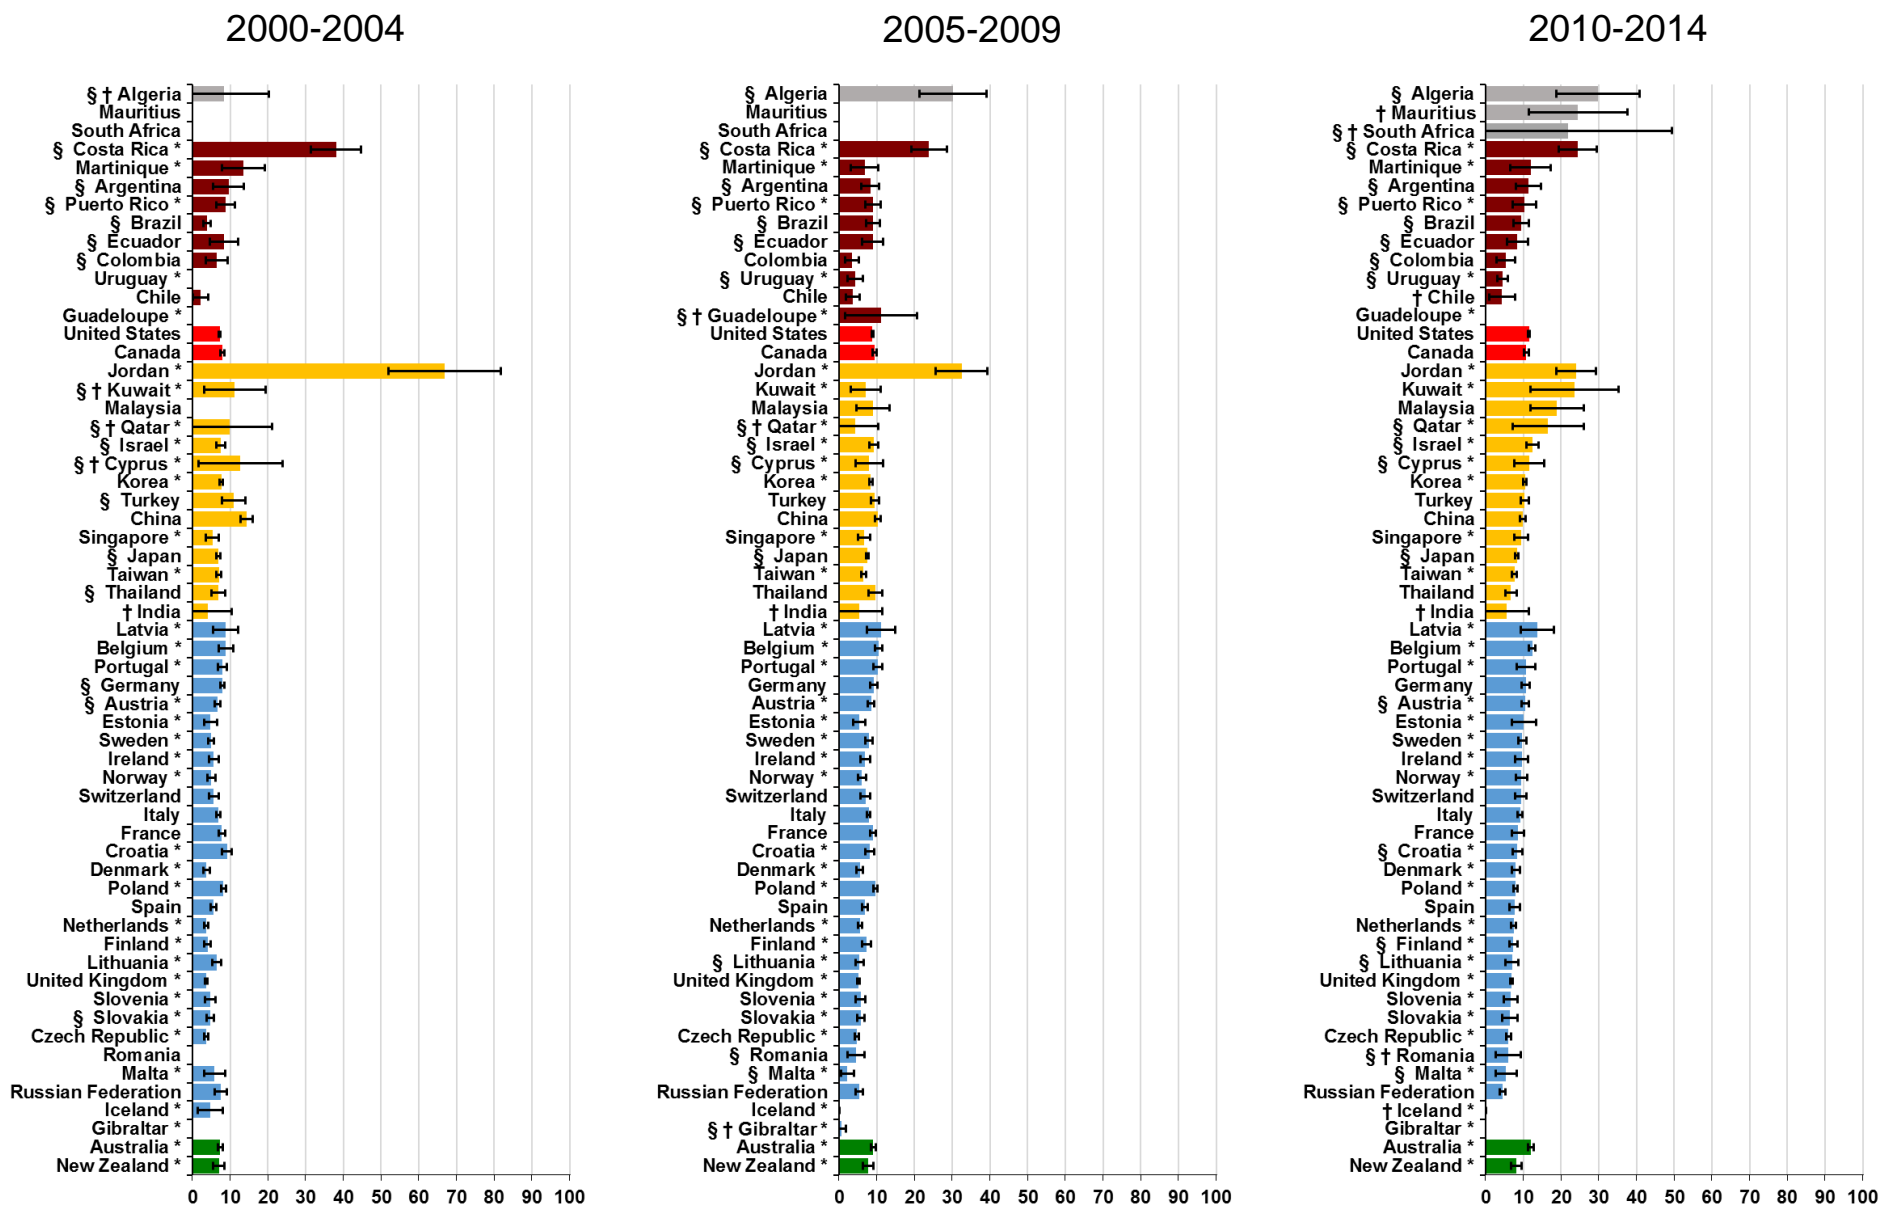

Web-figure 2.7: Lung cancer – Global distribution of age-standardised five-year net survival (%) in adults (15-99 years), by continent, country and calendar period of diagnosis

Back

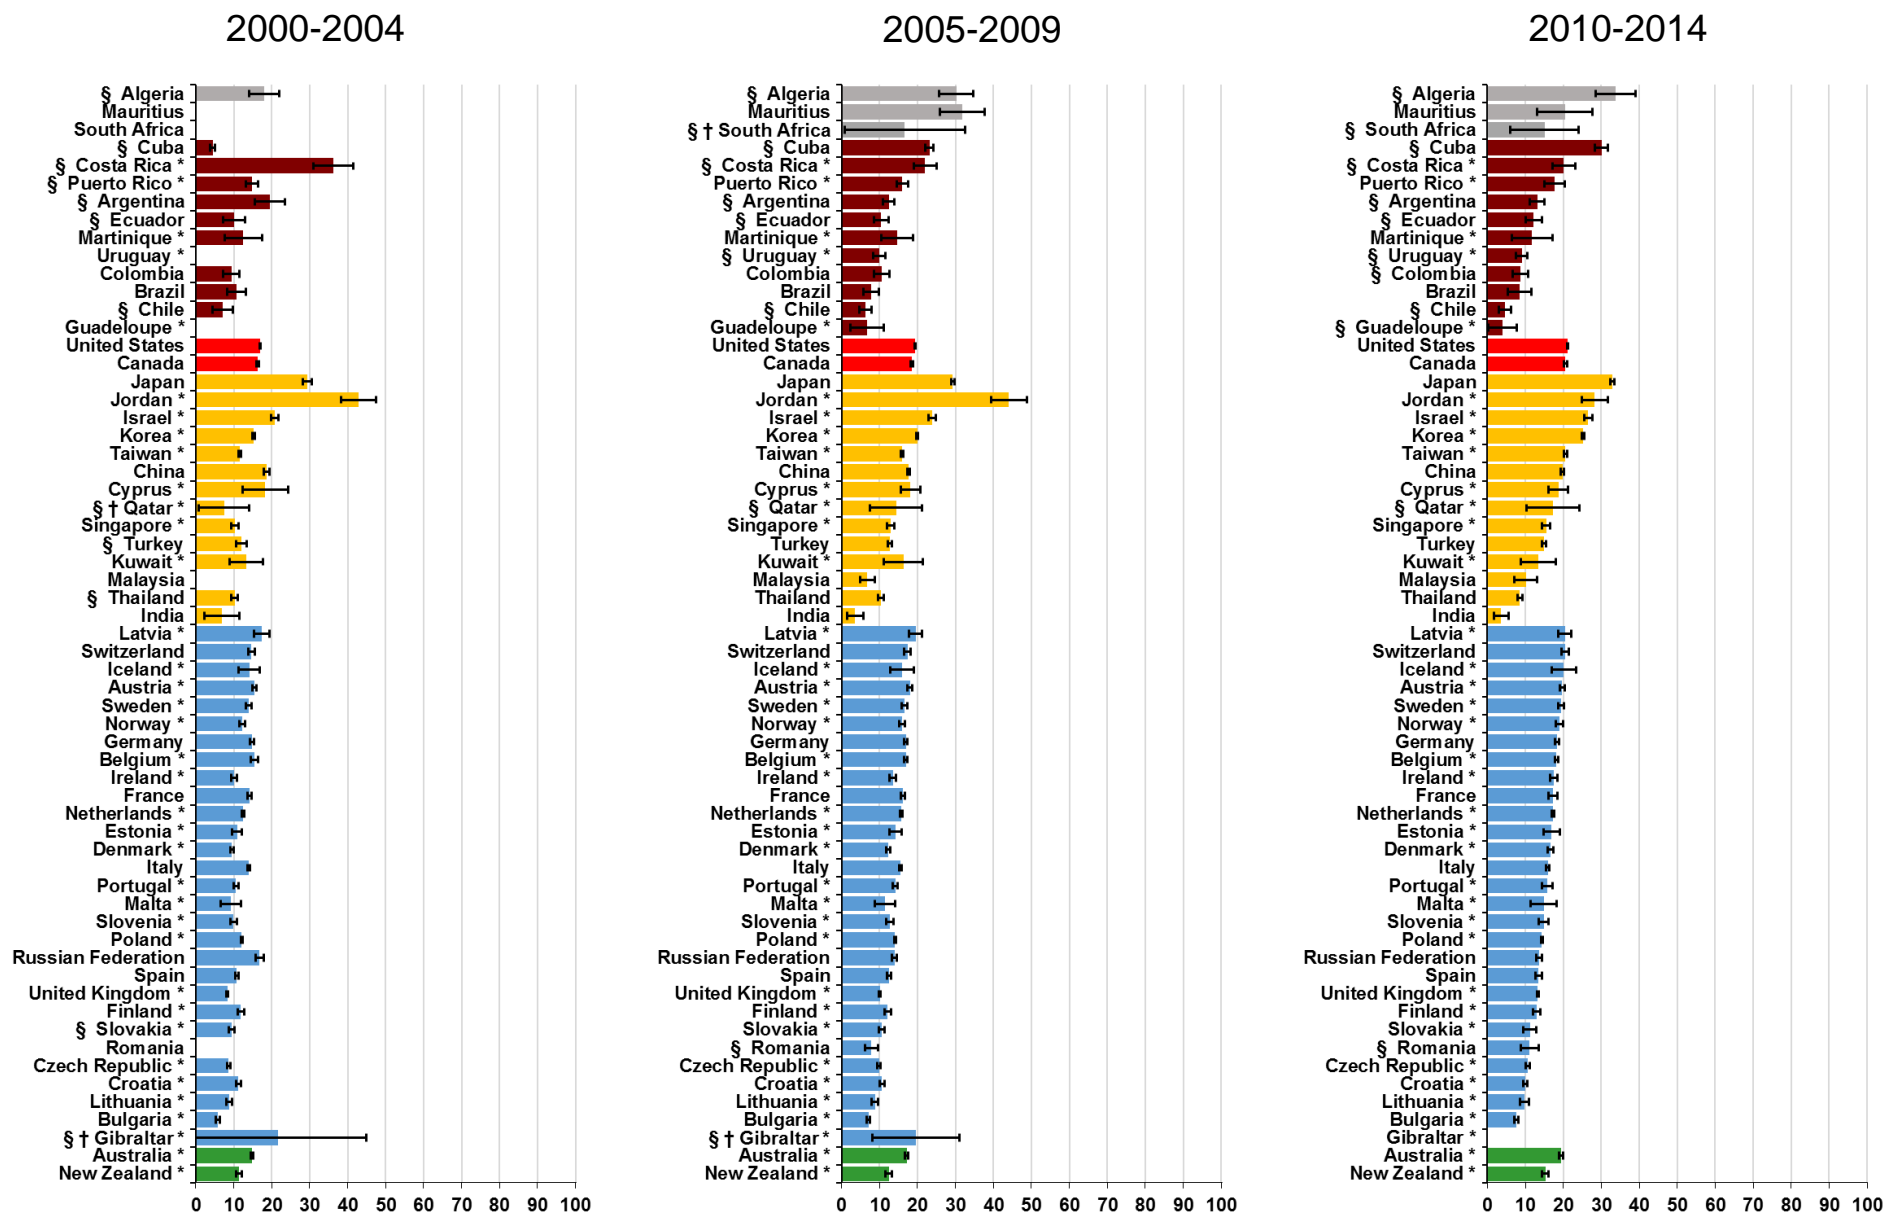

**Web-figure 2.8: Melanoma of the skin – Global distribution of age-standardised five-year net survival (%) in adults (15-99 years), by continent, country** [Back](#) and calendar period of diagnosis

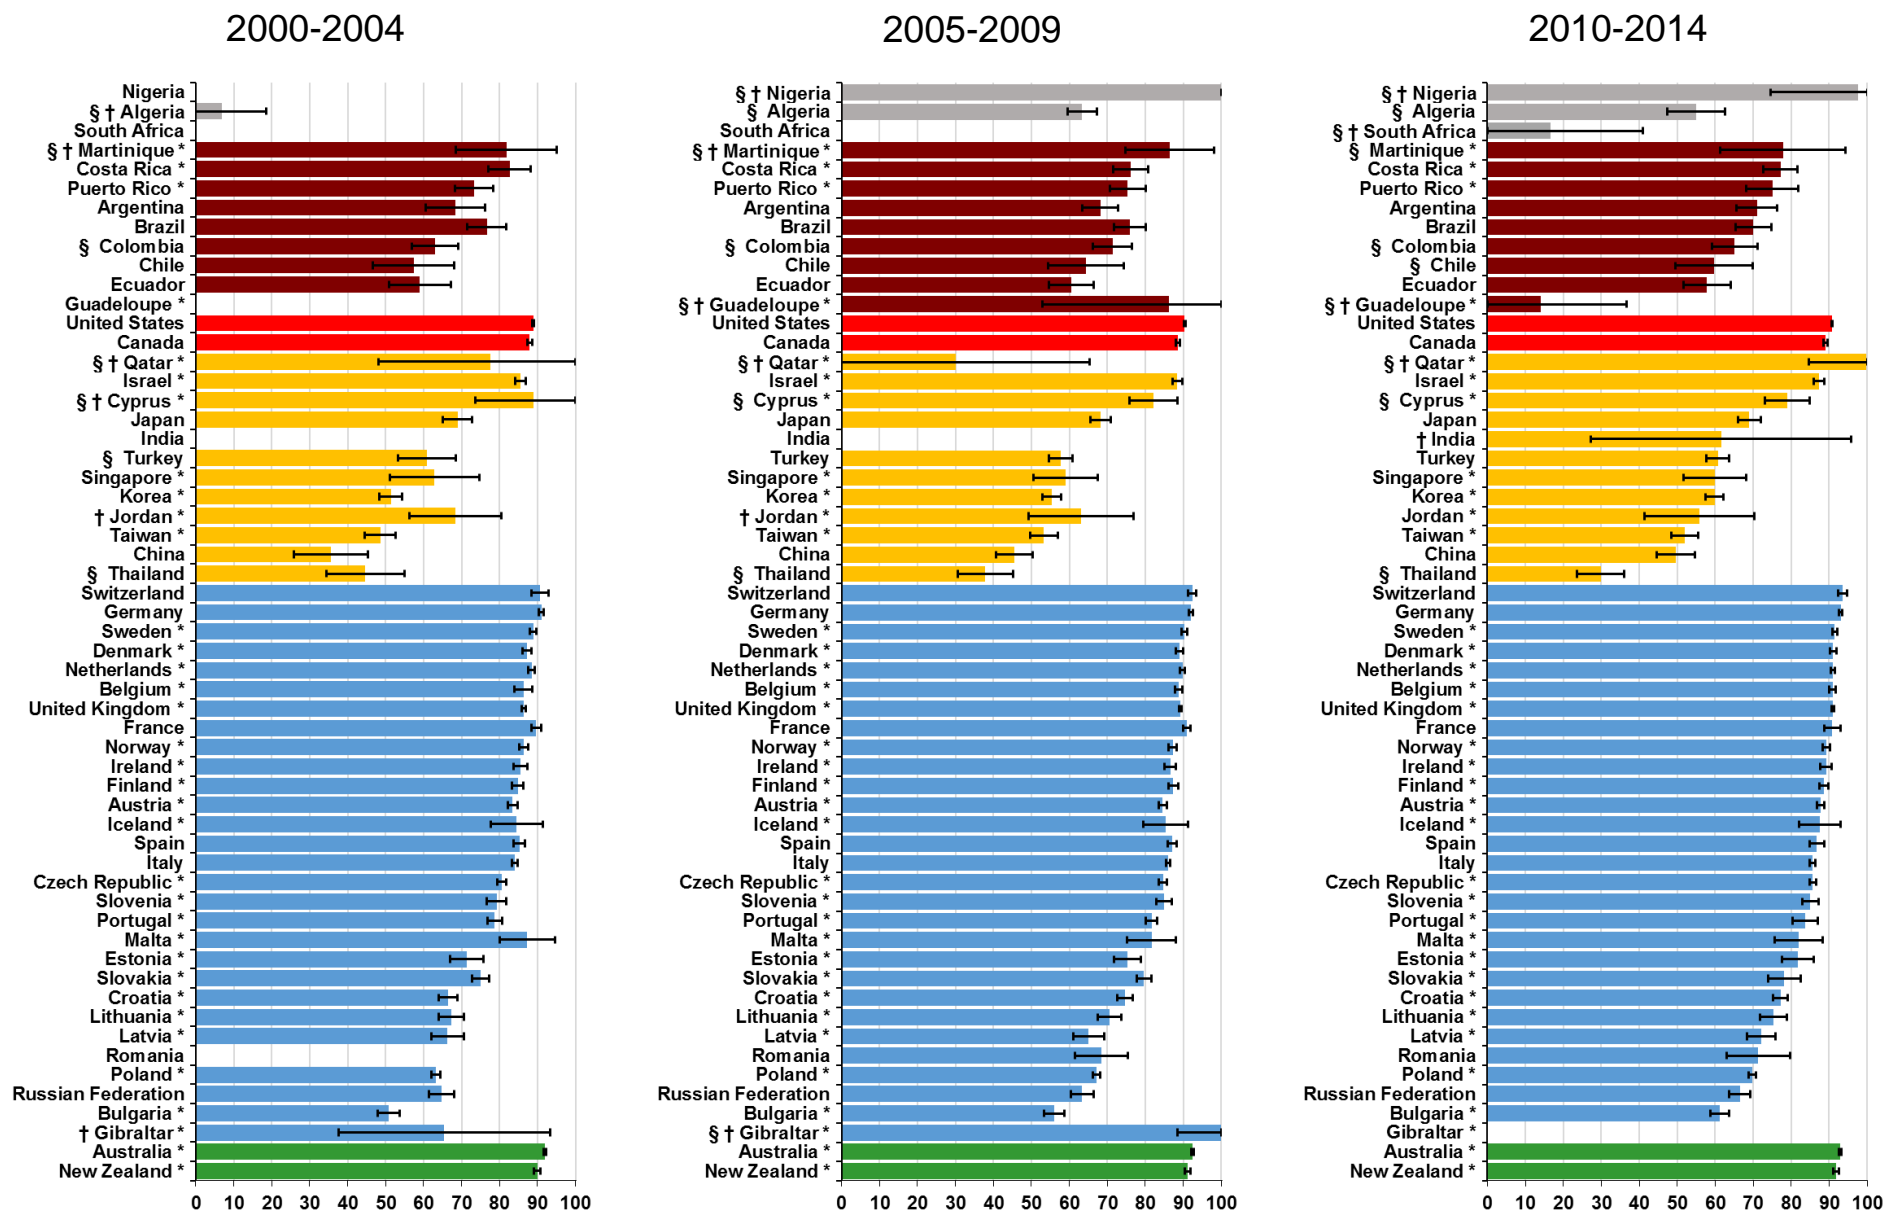

**Web-figure 2.9: Breast cancer** – Global distribution of age-standardised five-year net survival (%) in women (15-99 years), by continent, country and calendar period of diagnosis

[Back](#)

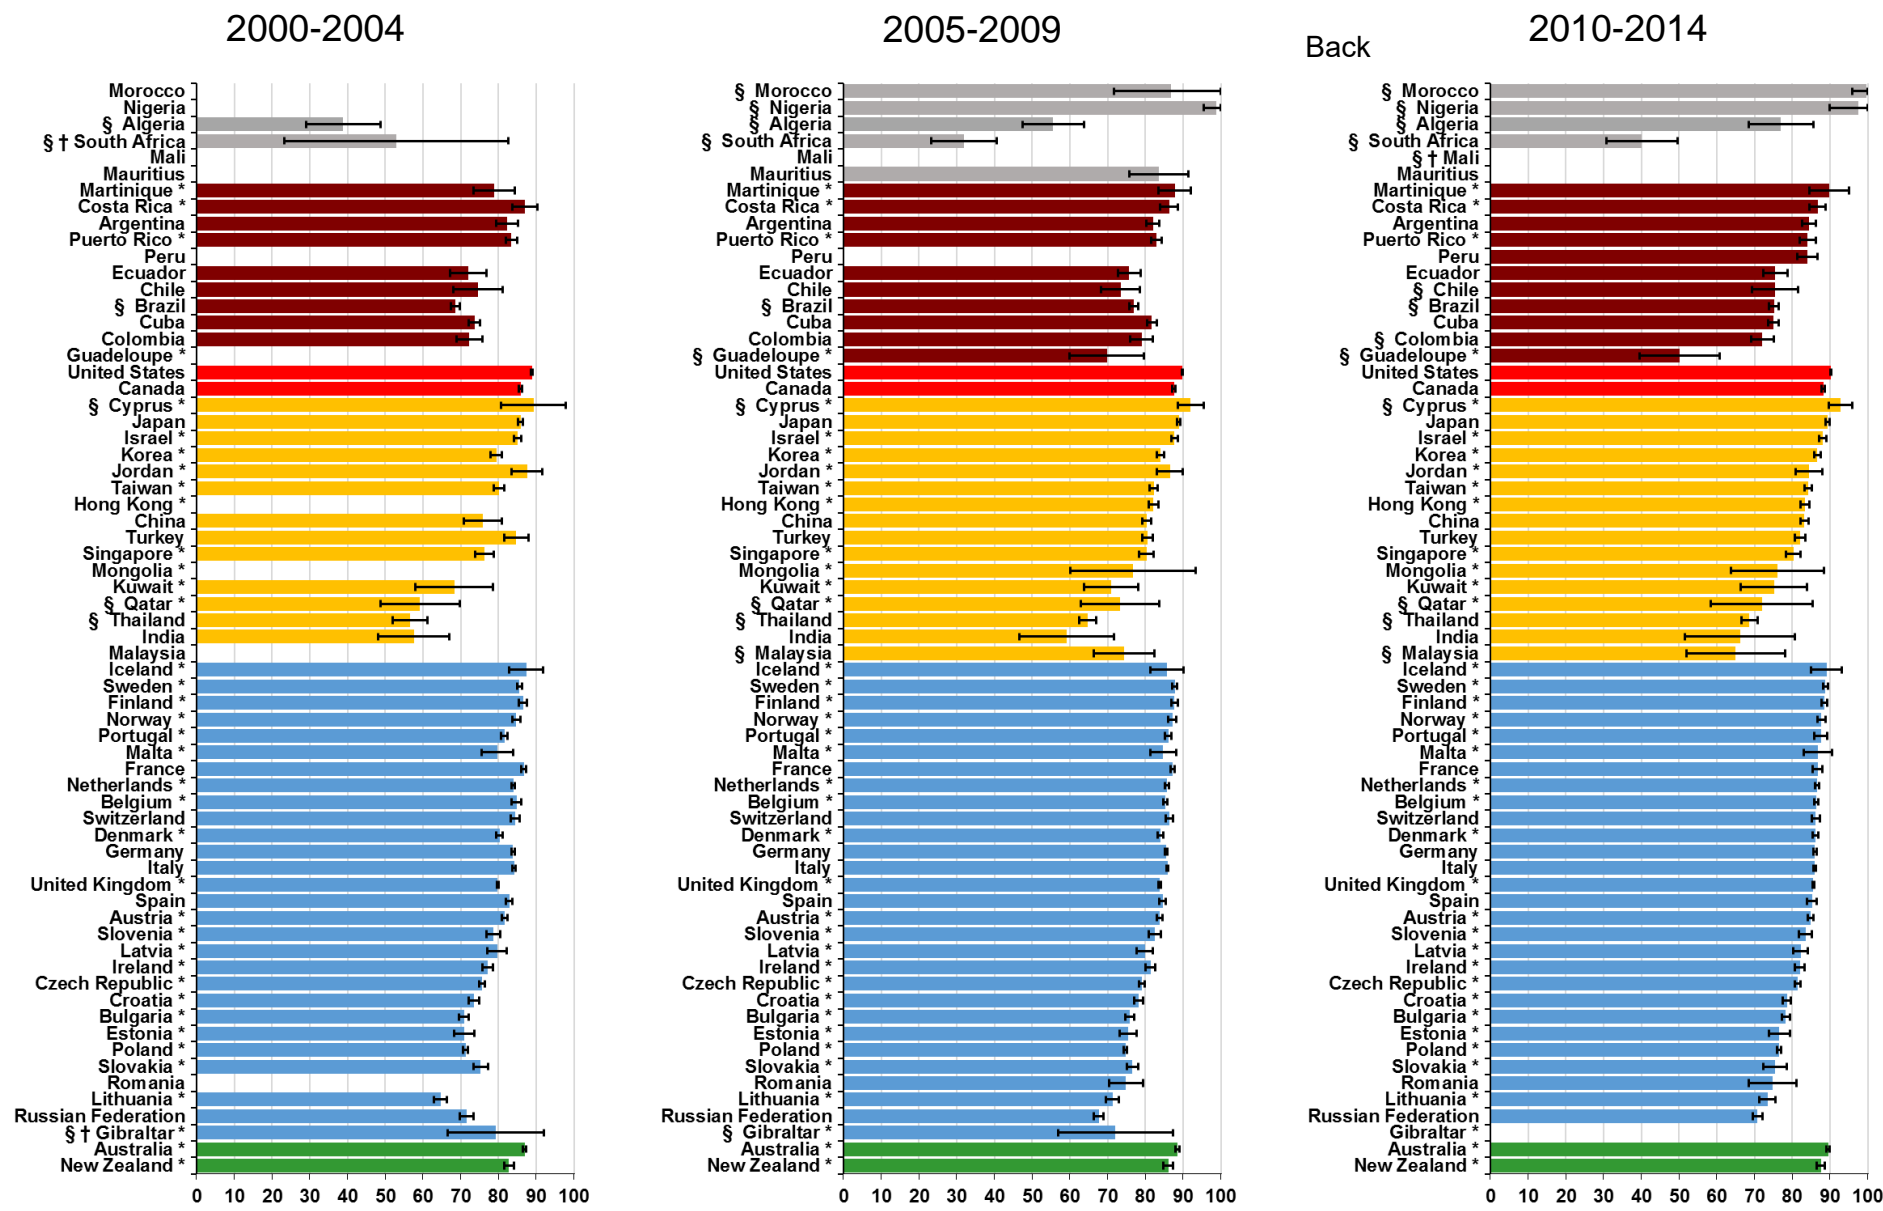

**Web-figure 2.10: Cervical cancer** – Global distribution of age-standardised five-year net survival (%) in women (15-99 years), by continent, country and calendar period of diagnosis

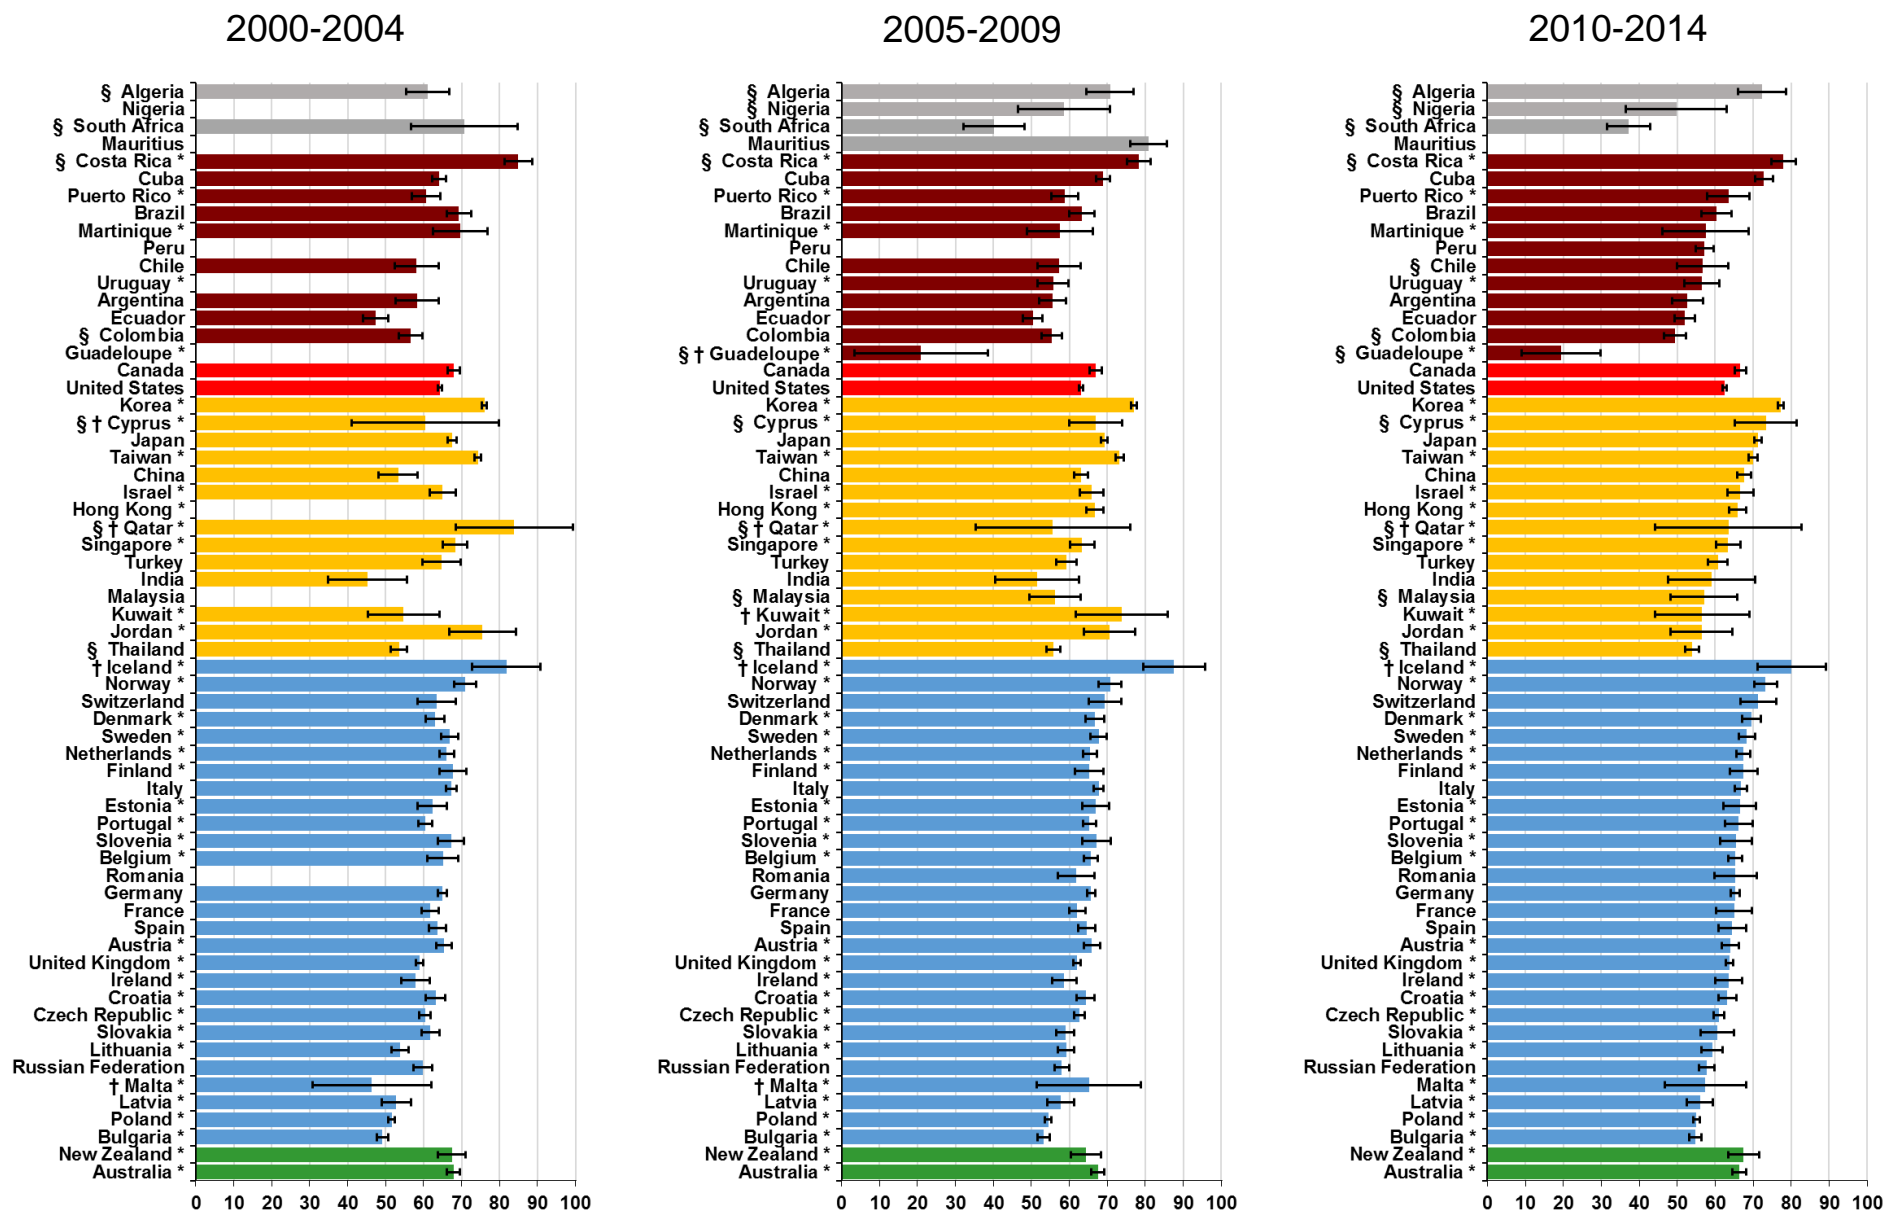

**Web-figure 2.11: Ovarian cancer** – Global distribution of age-standardised five-year net survival (%) in women (15-99 years), by continent, country and calendar period of diagnosis Back

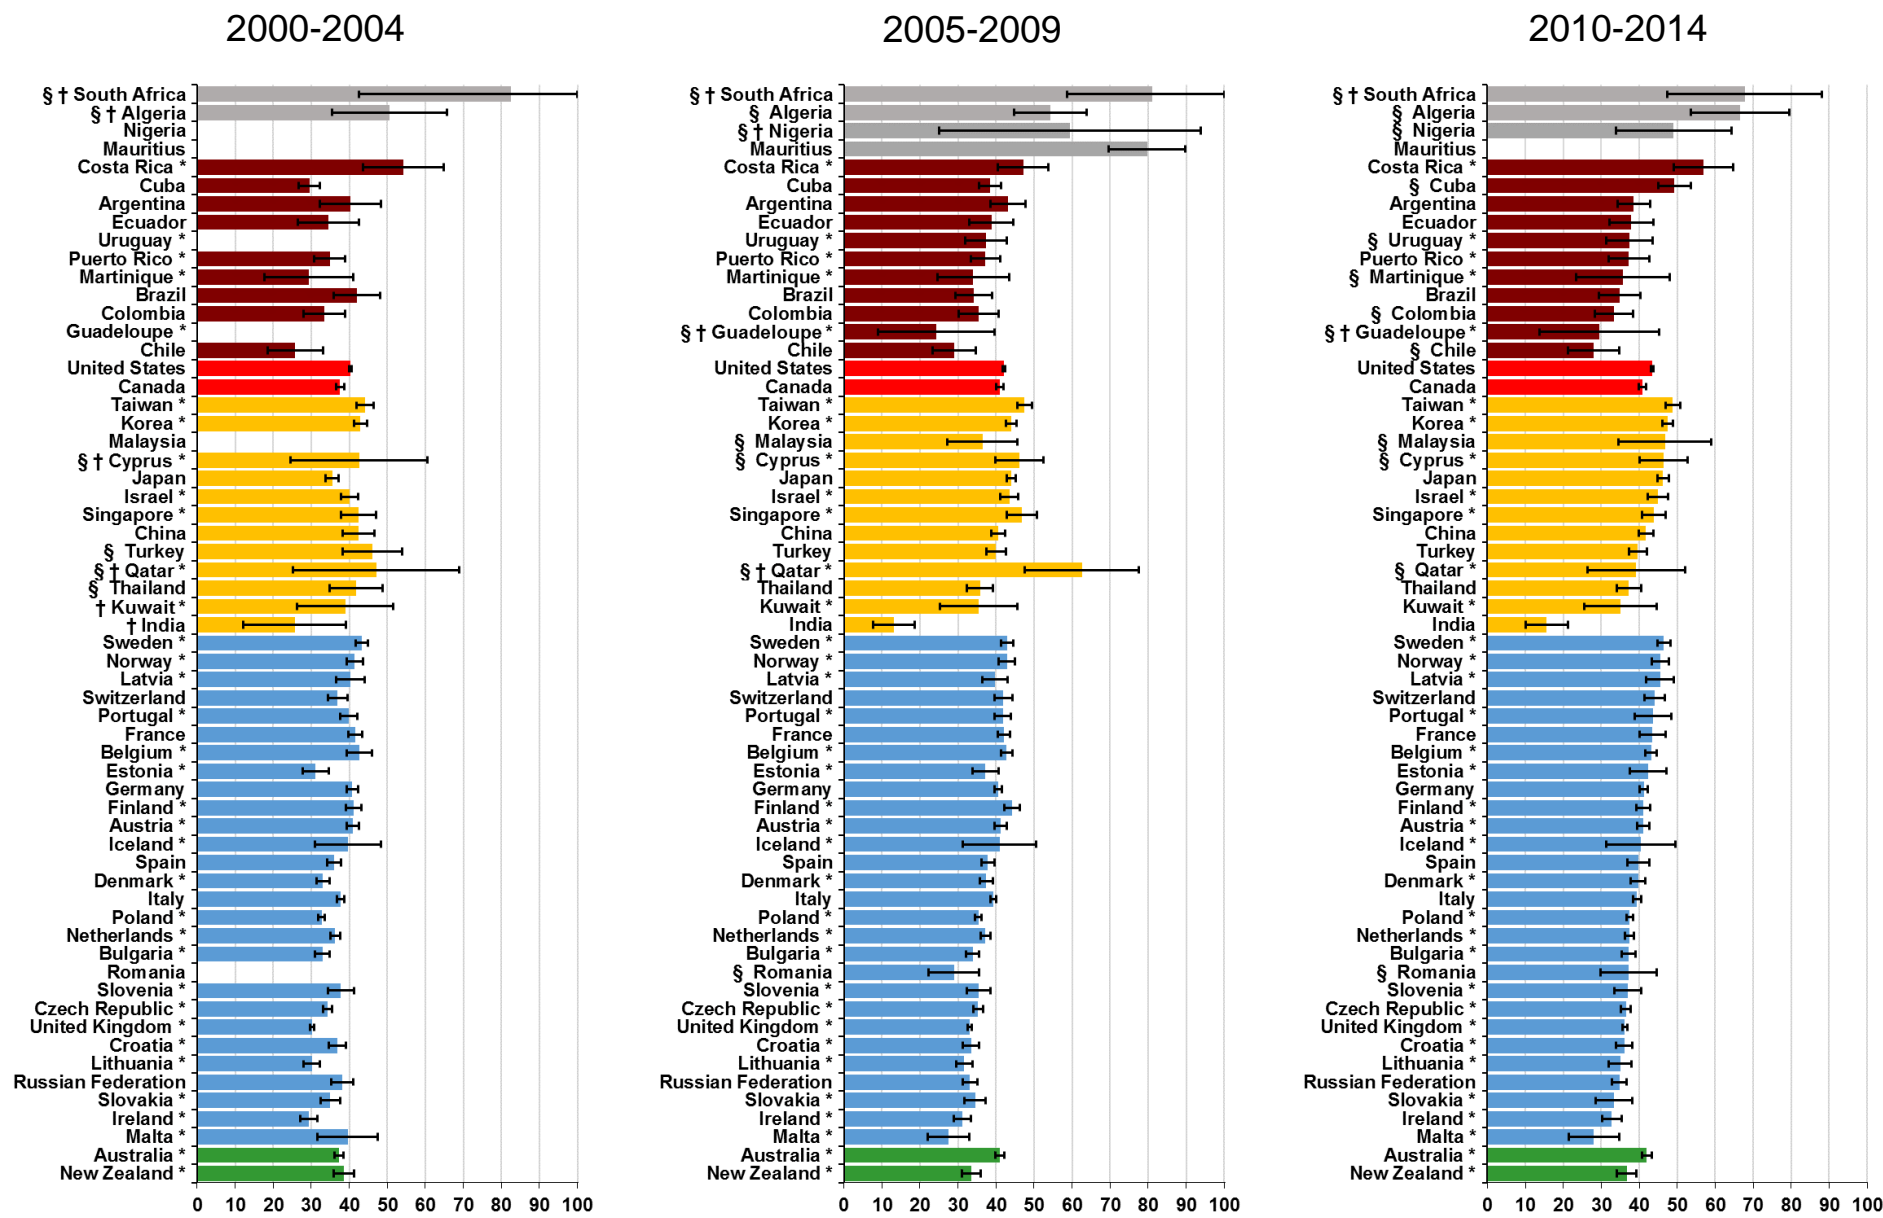

**Web-figure 2.12: Prostate cancer** – Global distribution of age-standardised five-year net survival (%) in men (15-99 years), by continent, country and calendar period of diagnosis Back

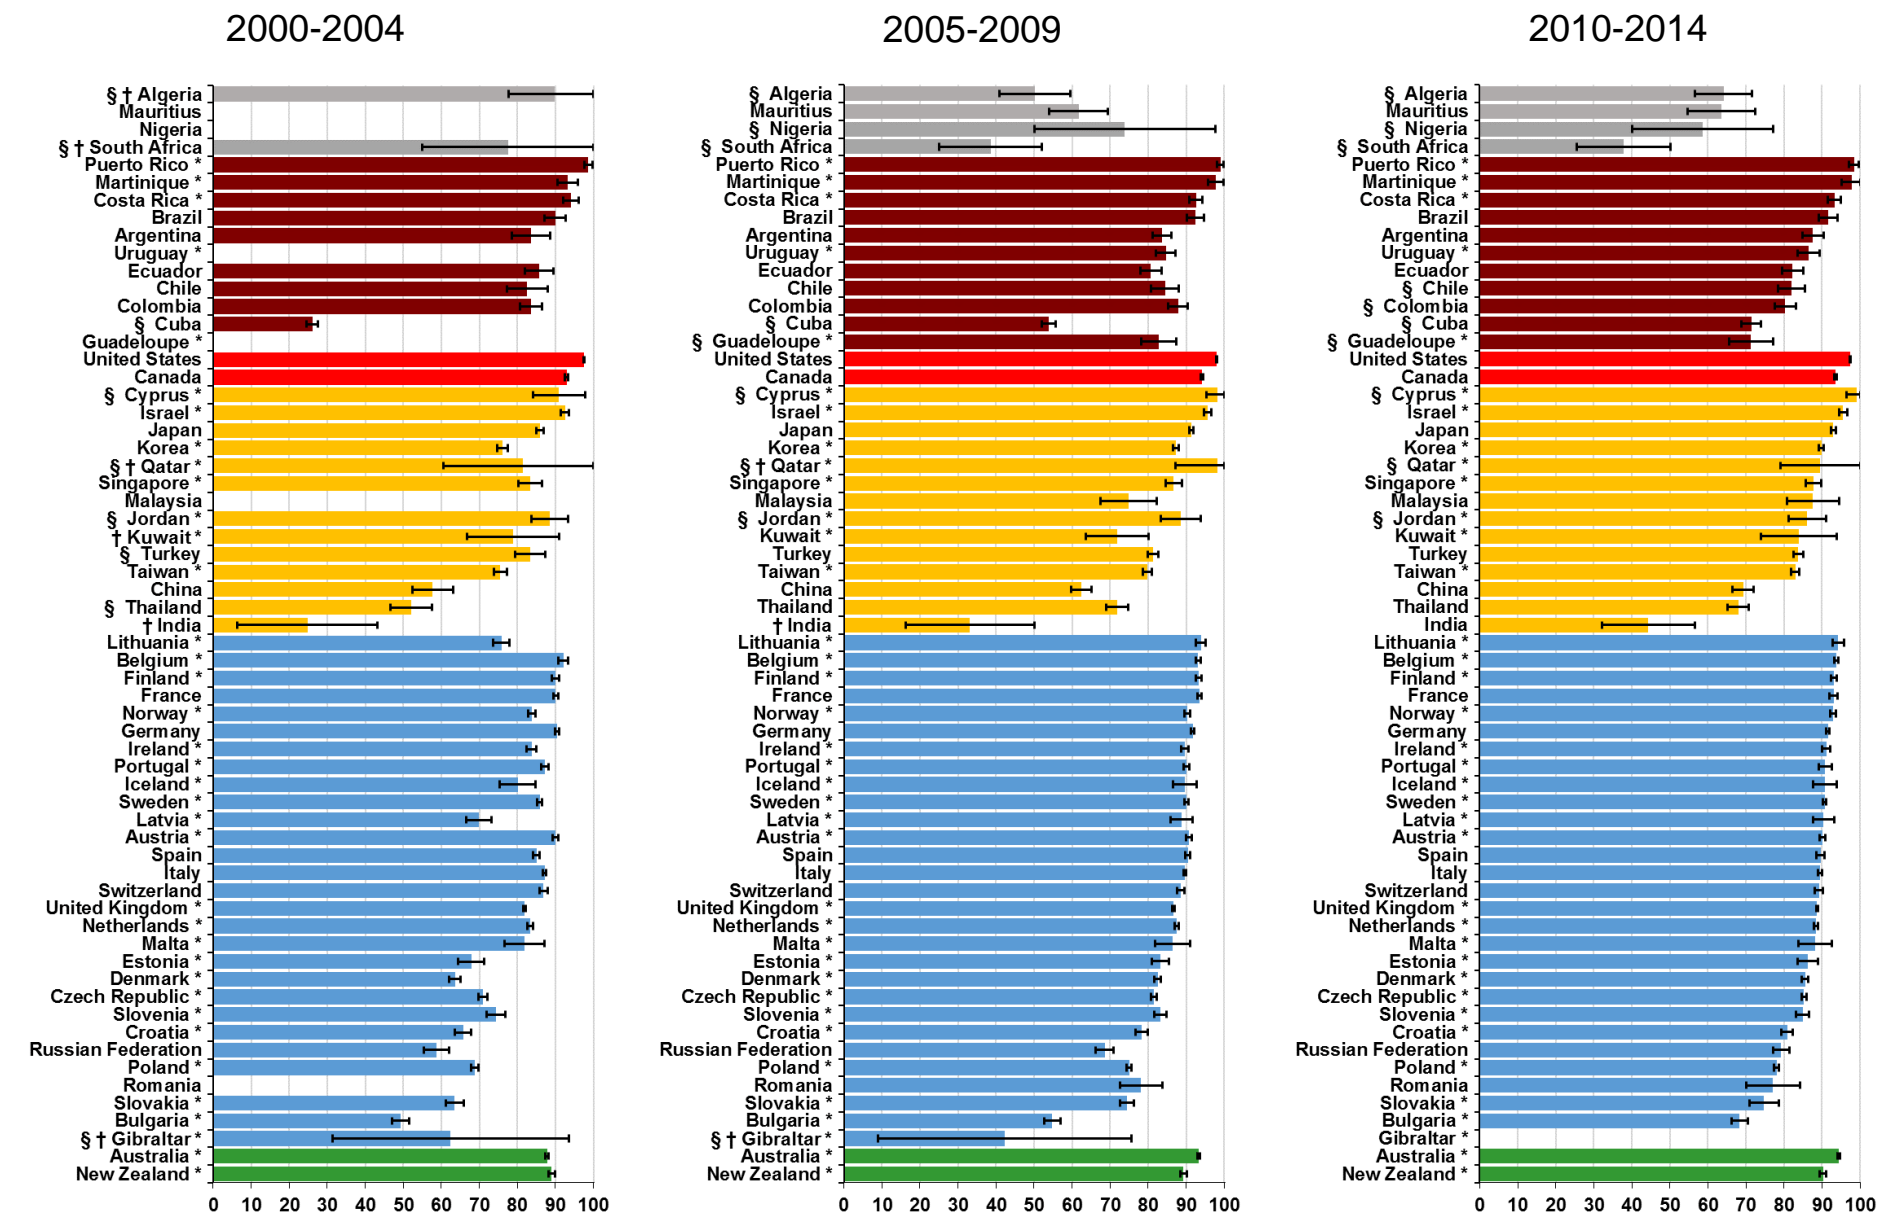

**Web-figure 2.13: Brain (adults)** – Global distribution of age-standardised five-year net survival (%) in adults (15-99 years), by continent, country and calendar period of diagnosis

[Back](#)

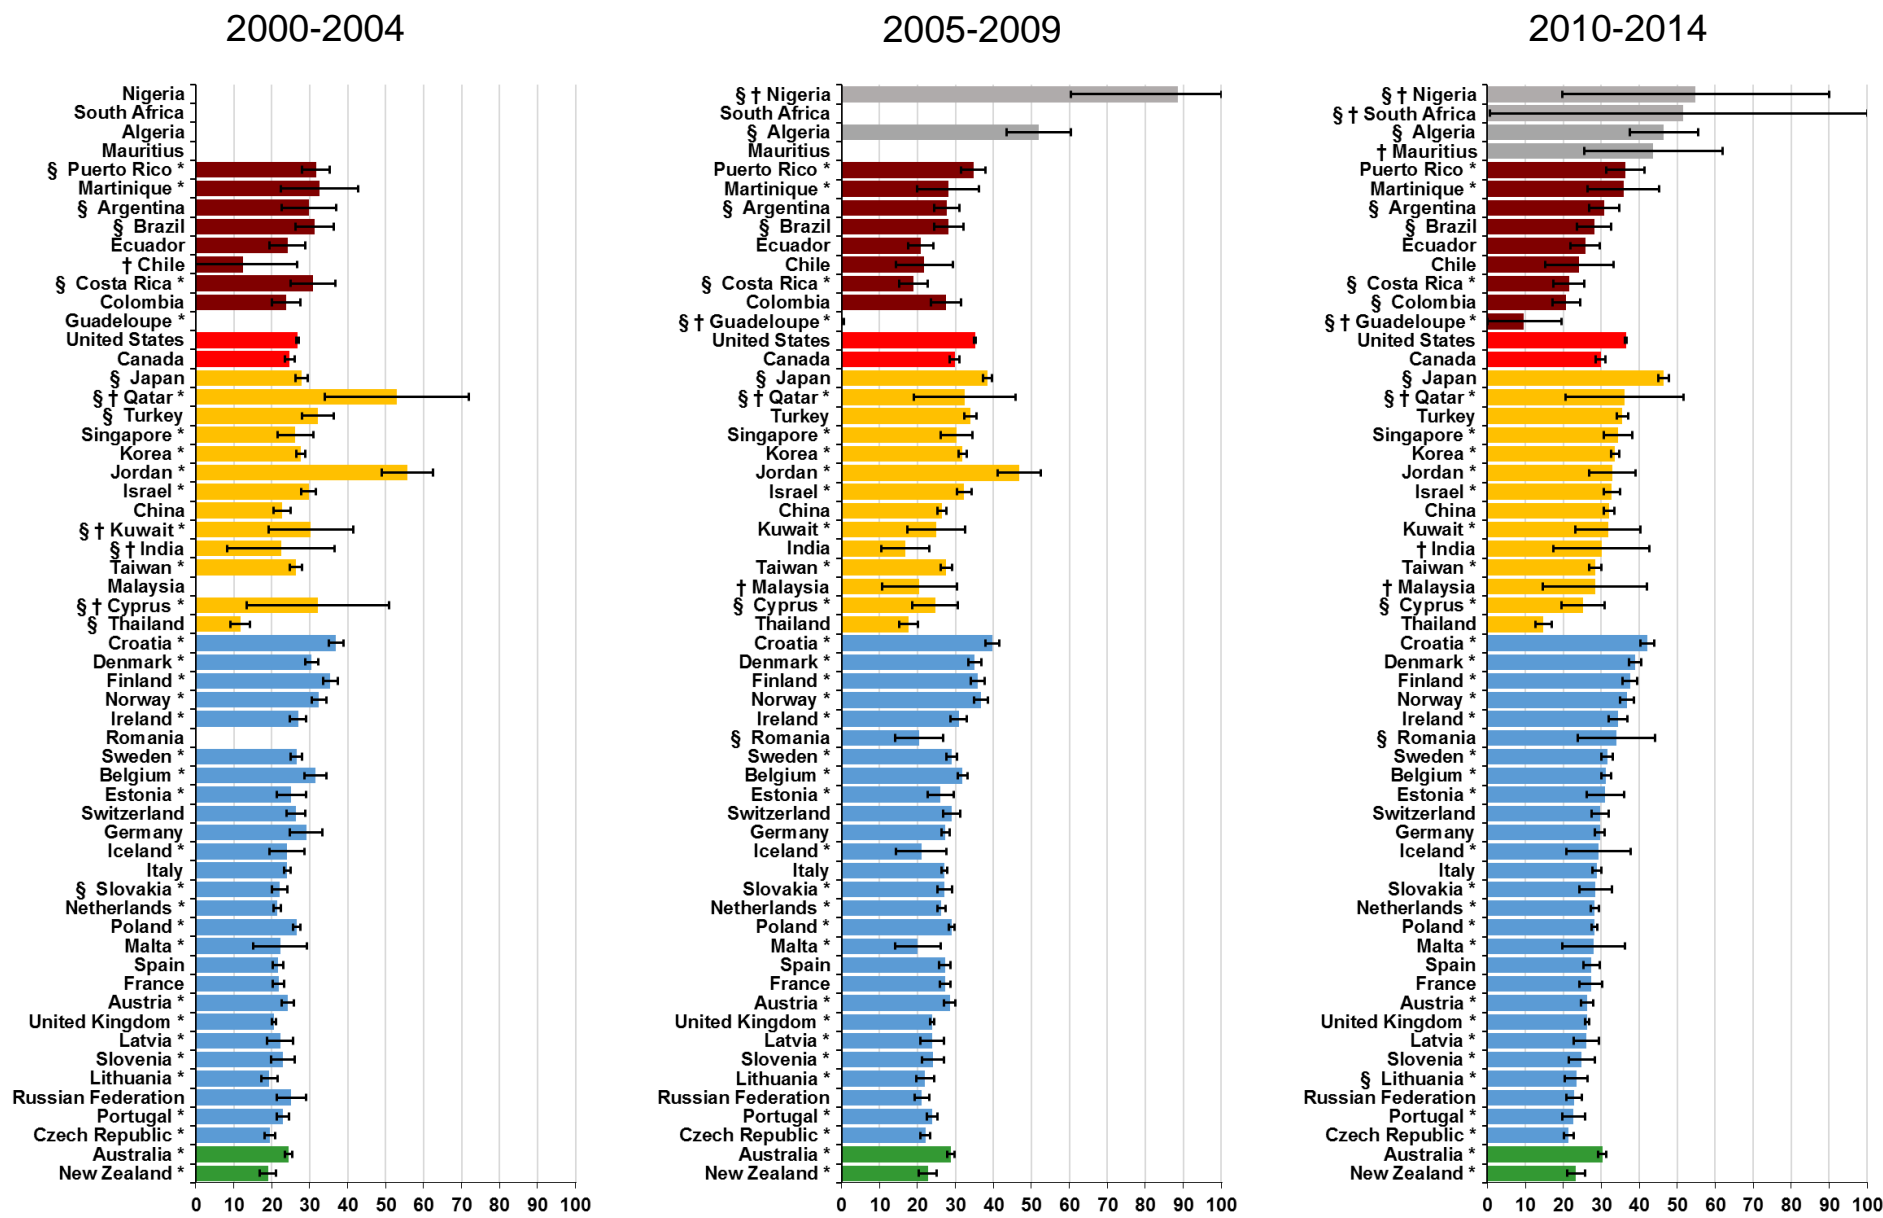

**Web-figure 2.14: Myeloid malignancies** – Global distribution of age-standardised five-year net survival (%) in adults (15-99 years), by continent, country and calendar period of diagnosis

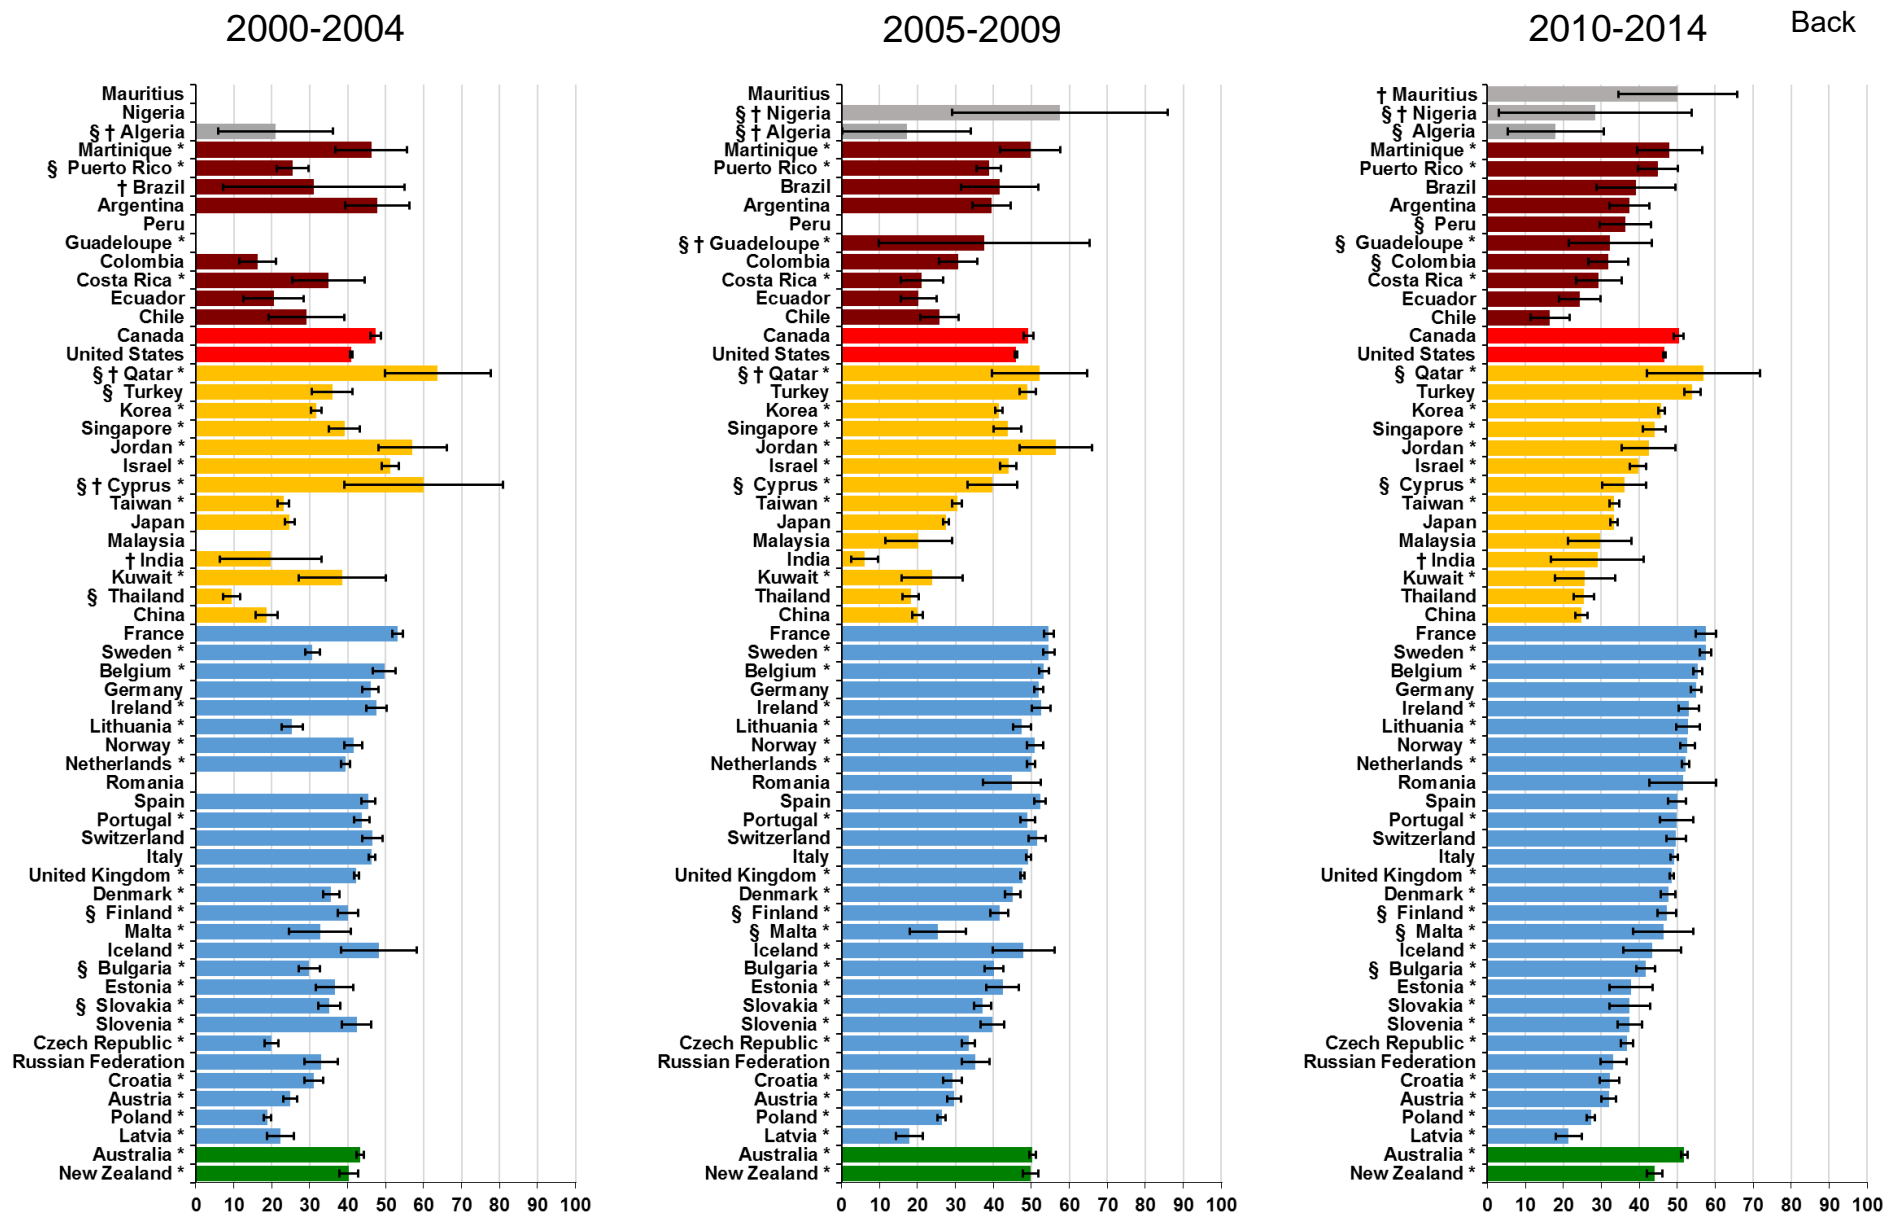

**Web-figure 2.15: Lymphoid malignancies** – Global distribution of age-standardised five-year net survival (%) in adults (15-99 years), by continent, country and calendar period of diagnosis

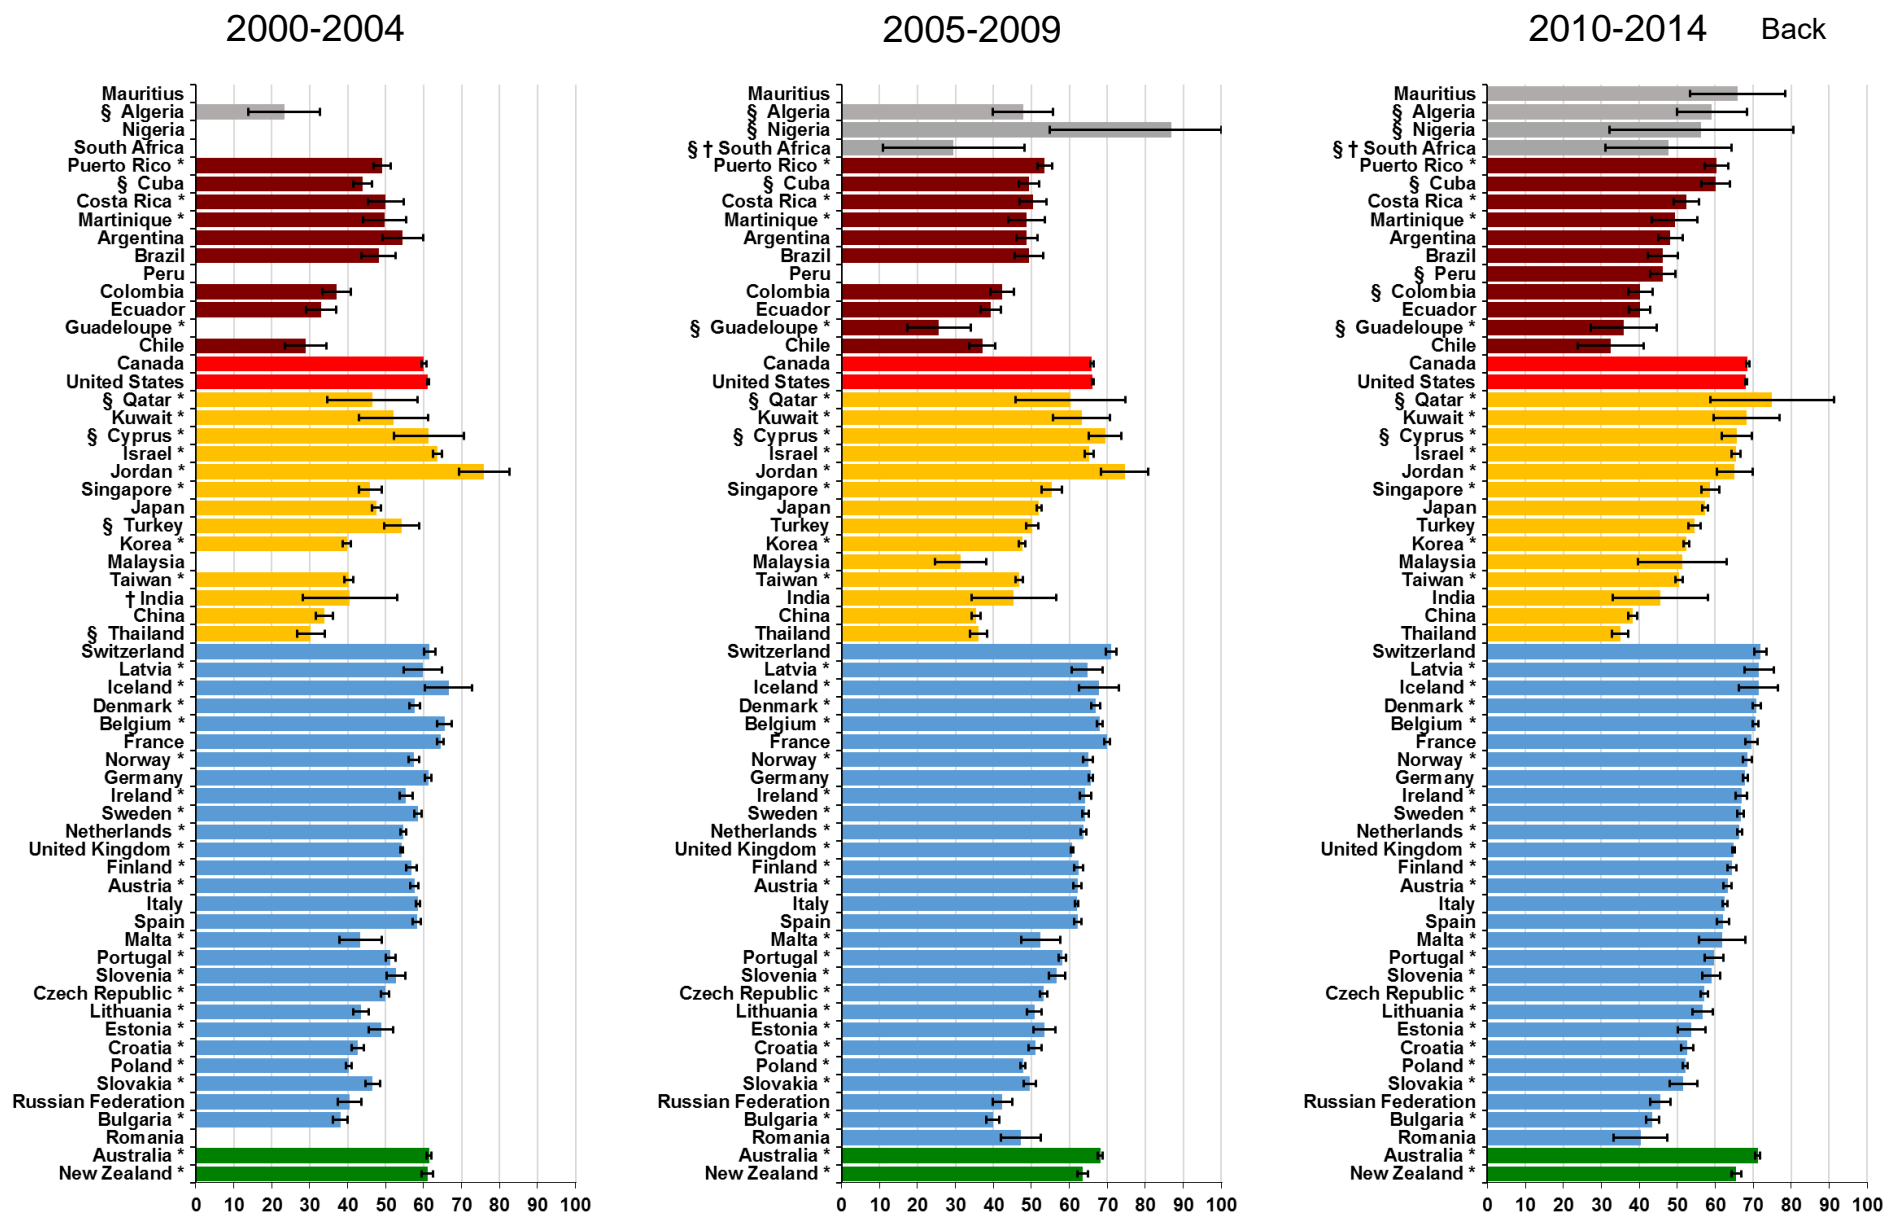

**Web-figure 2.16: Brain (children)** – Global distribution of age-standardised five-year net survival (%) in children (0-14 years), by continent, country and calendar period of diagnosis

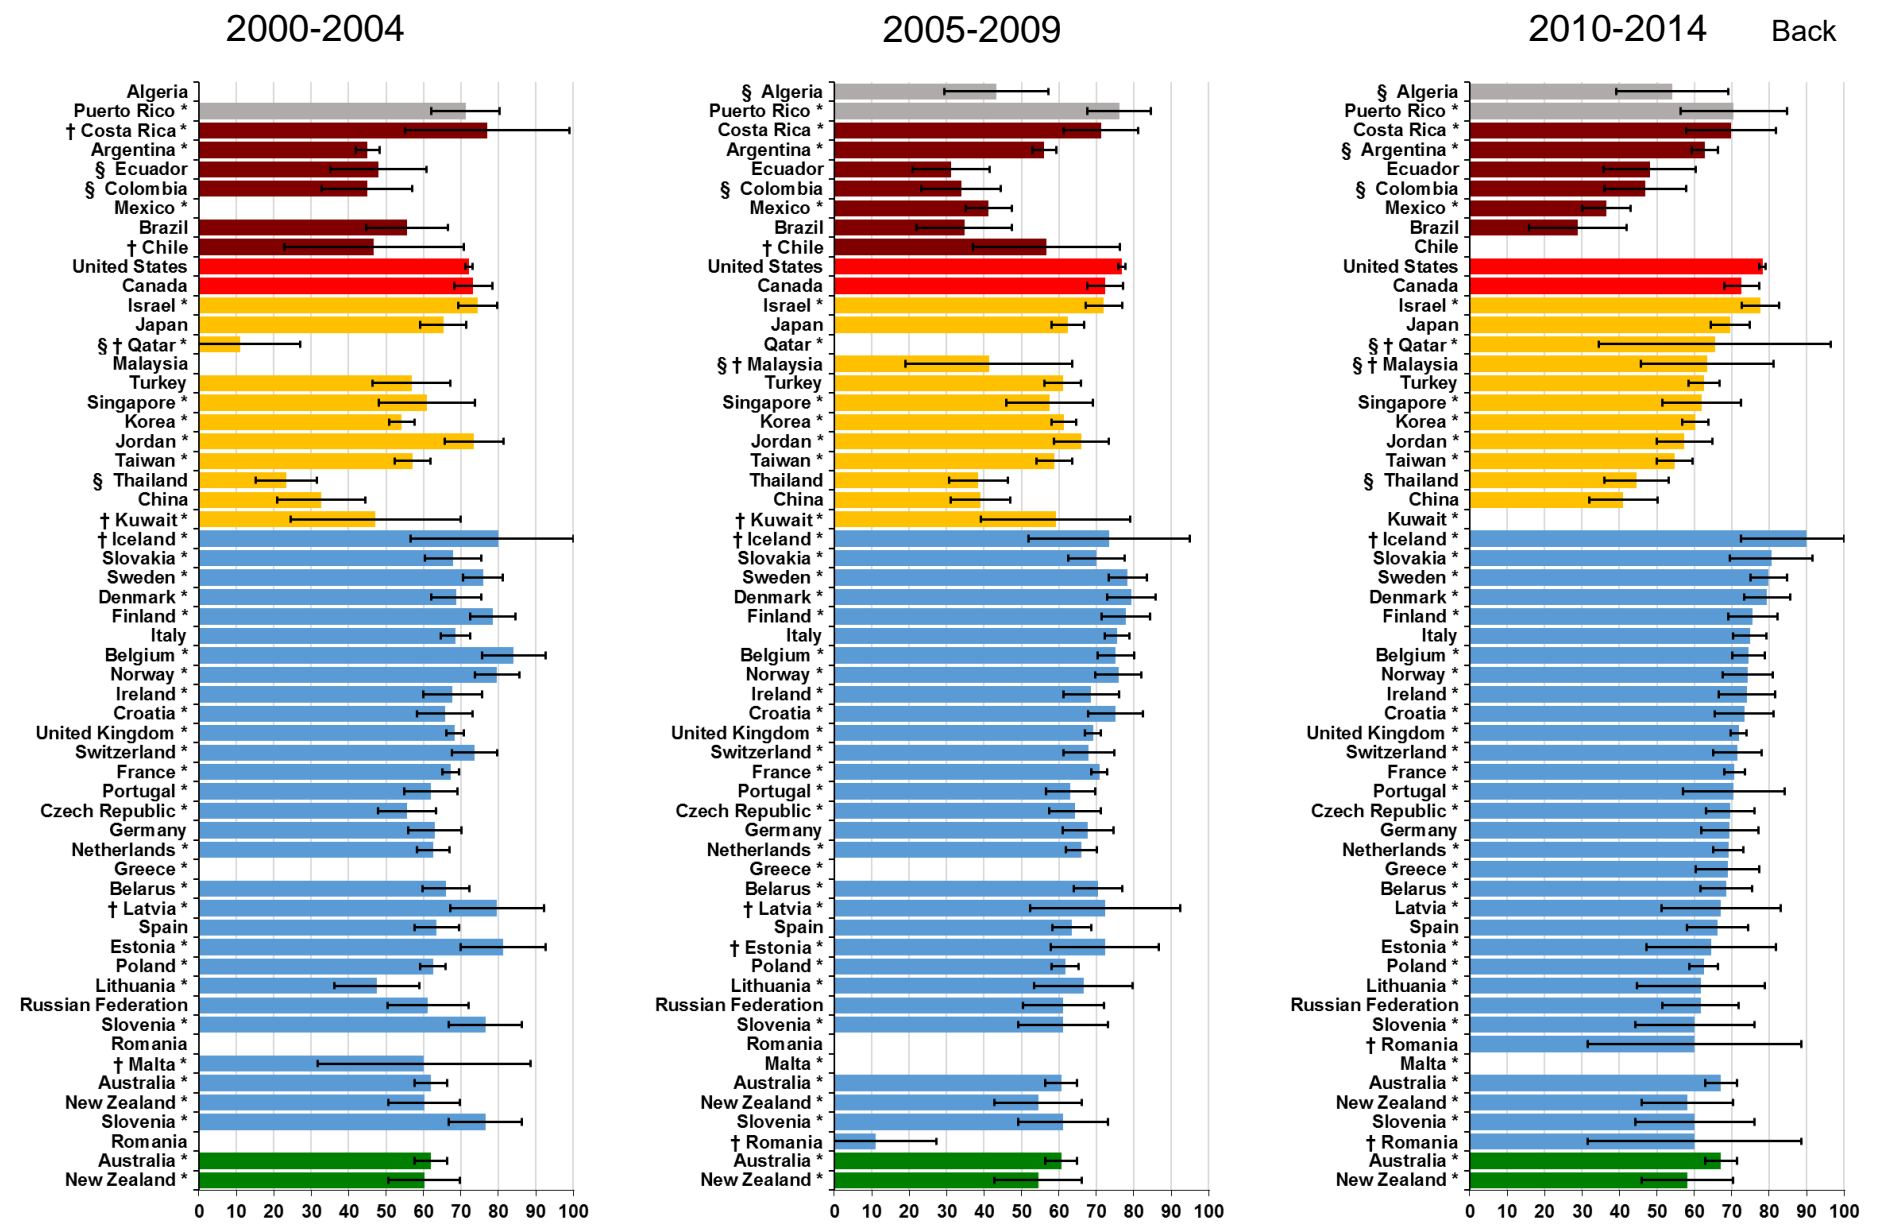

Web-figure 2.17: Acute lymphoblastic leukaemia – Global distribution of age-standardised five-year net survival (%) in children (0-14 years), by continent, country and calendar period of diagnosis

Back

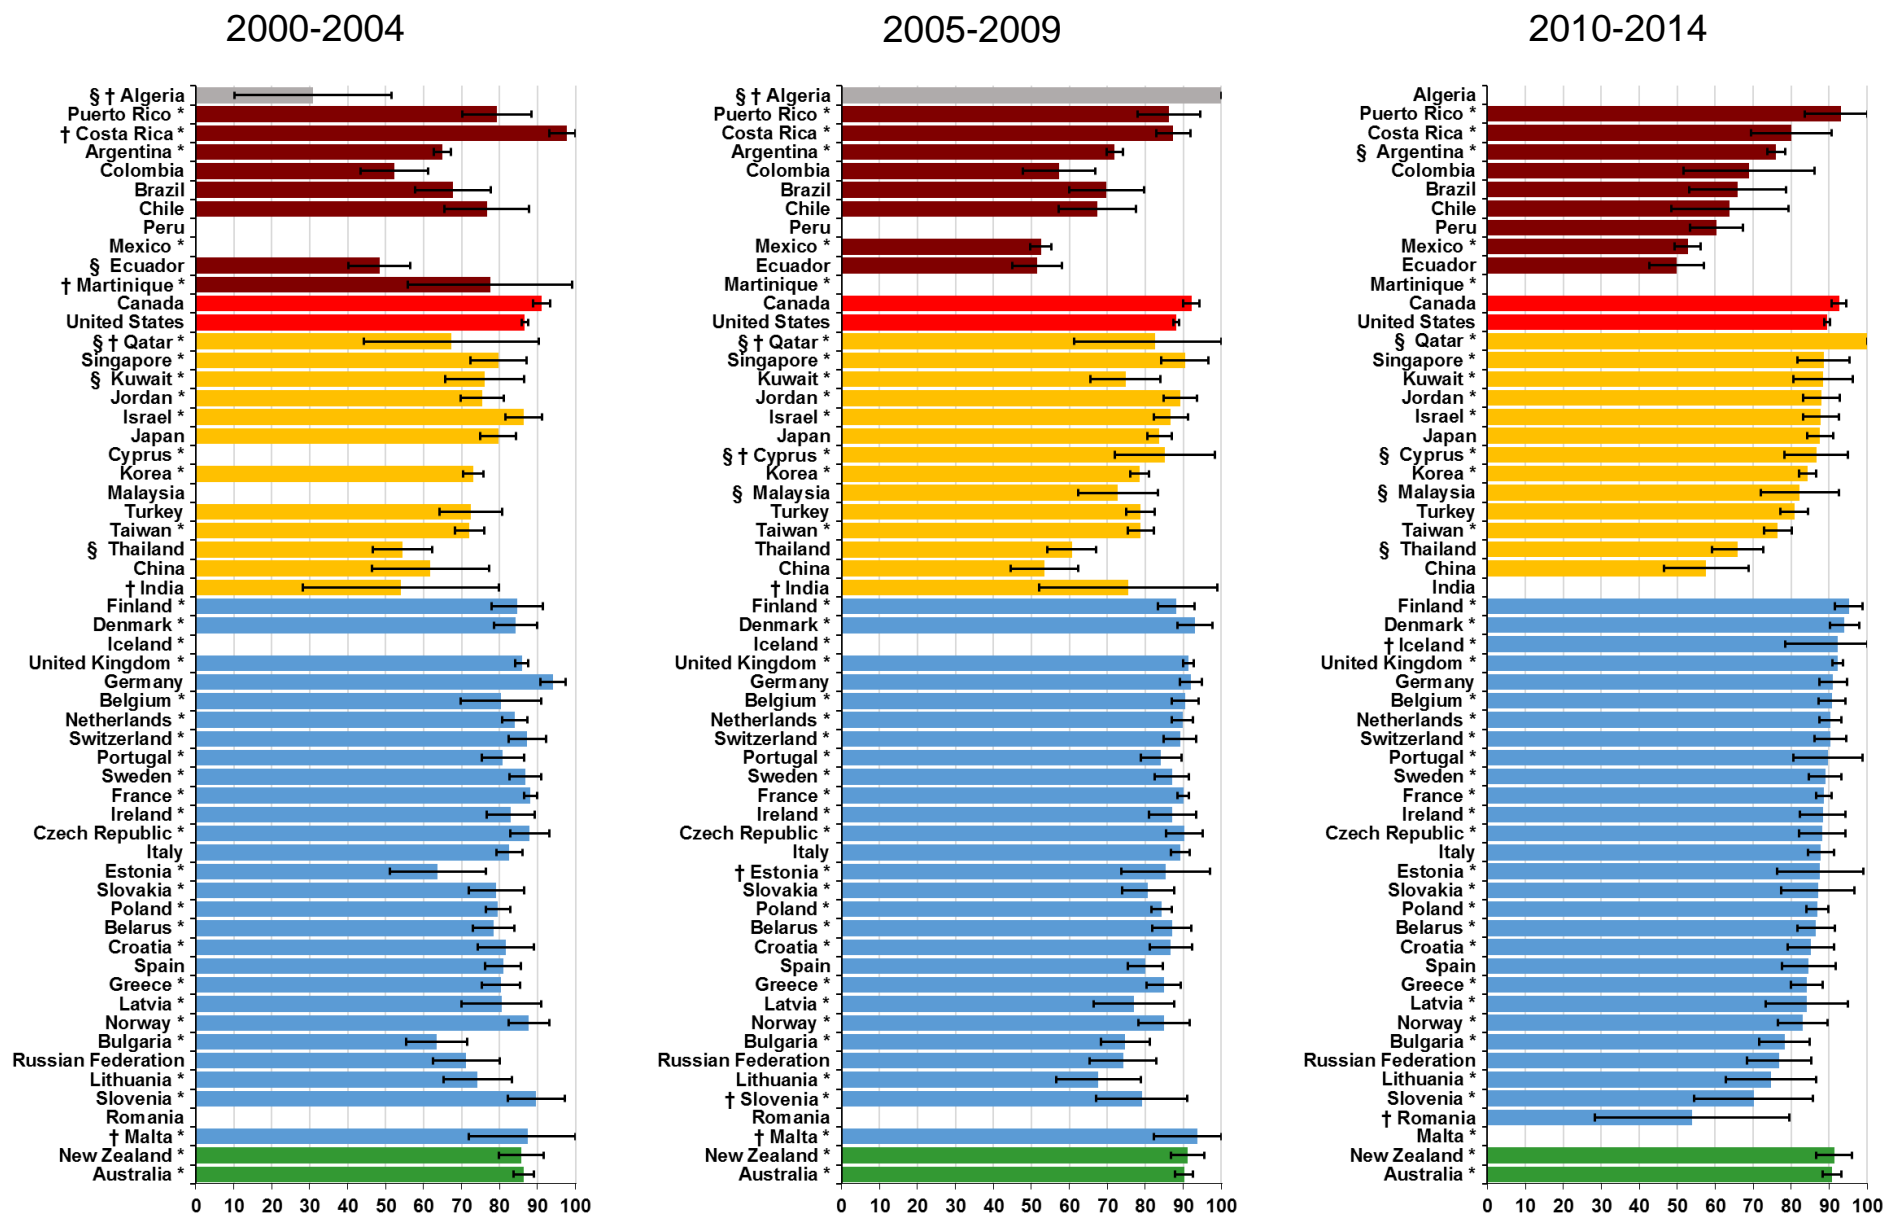

**Web-figure 2.18: Lymphomas** – Global distribution of age-standardised five-year net survival (%) in children (0-14 years), by continent, country and calendar period of diagnosis Back

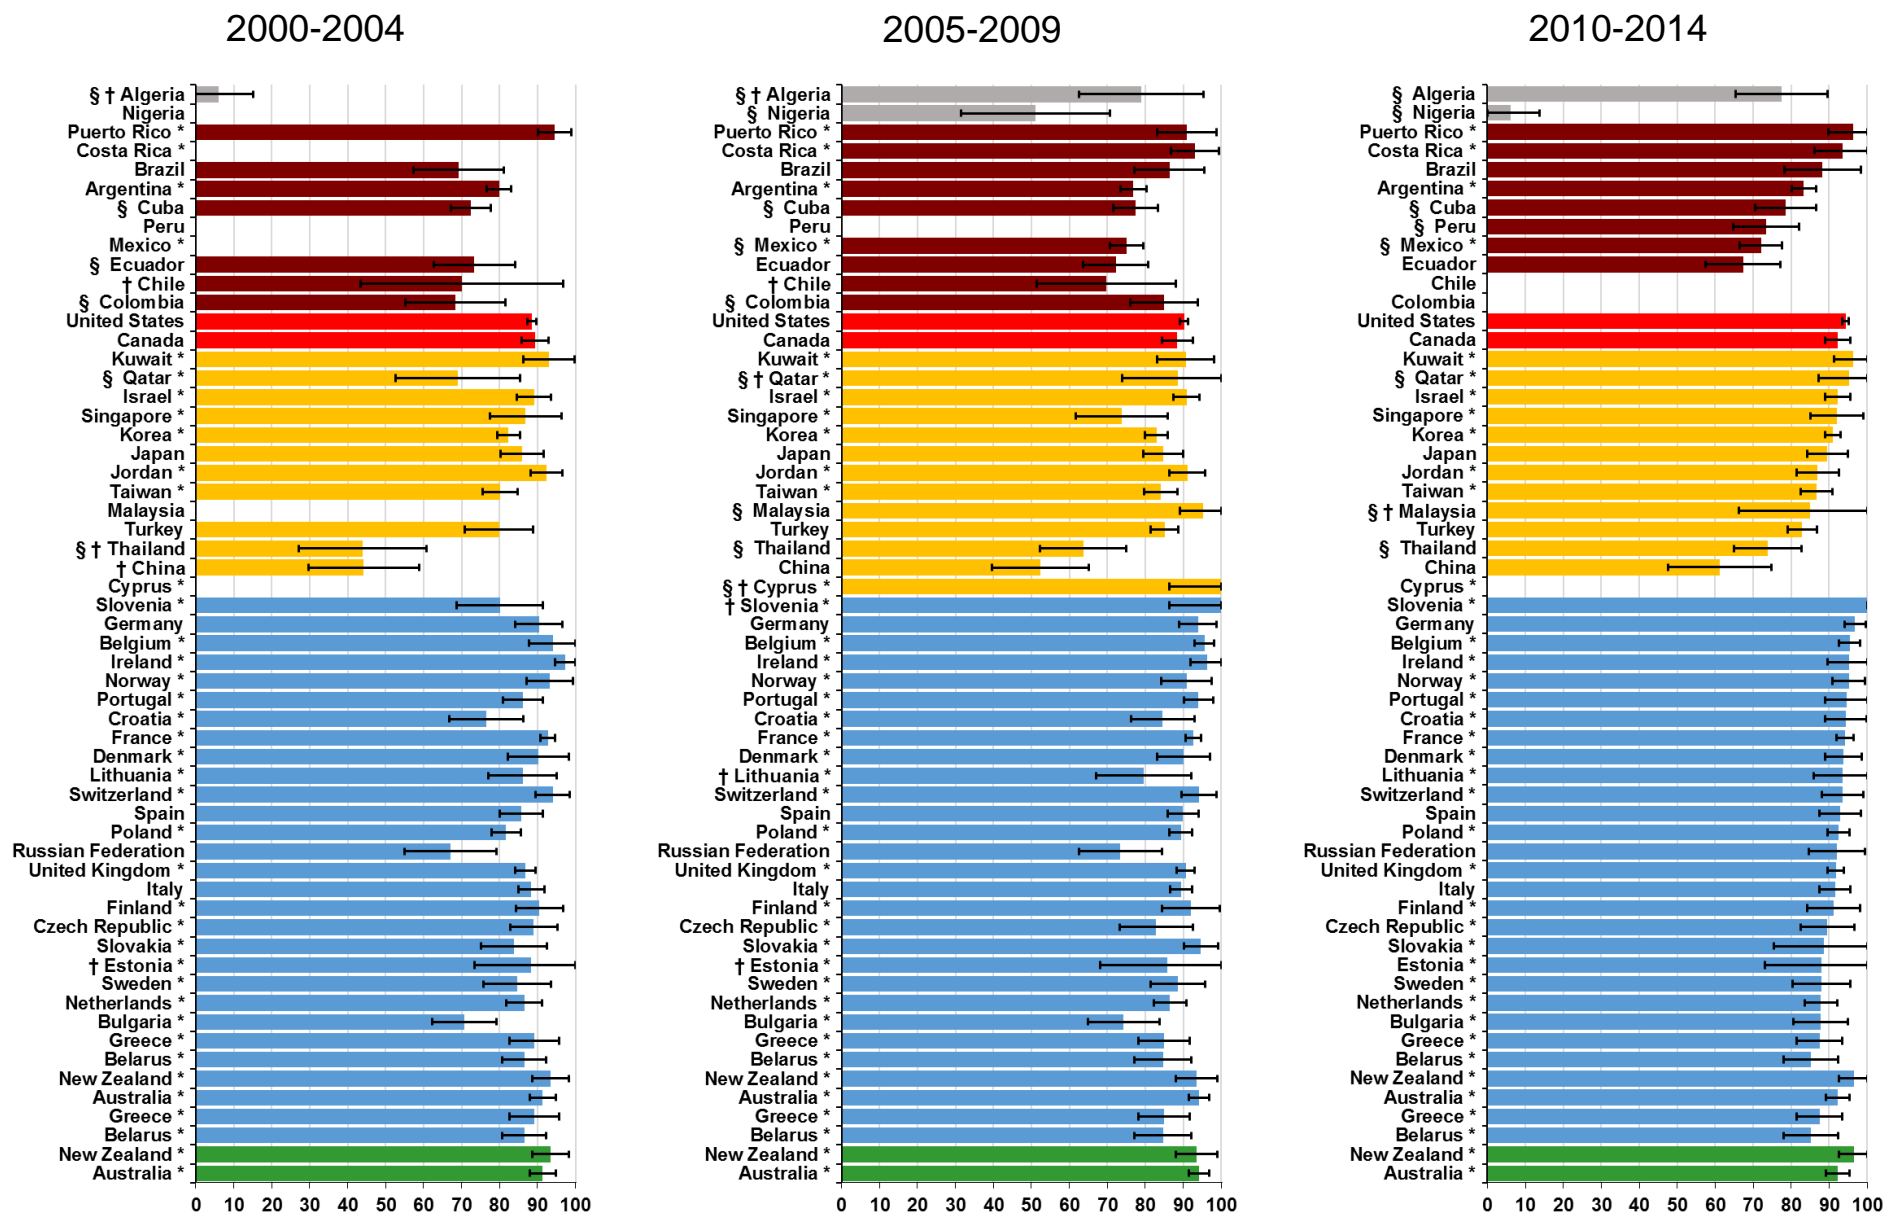

**Web-figure 3: 20-year trends in age-standardised five-year net survival (%) for adults (15-99 years) diagnosed with one of 15 common malignancies and children (0-14 years) diagnosed with one of 3 common malignancies during 1995-1999, 2000-2004, 2005-2009 and 2010-2014, by continent (or continental region) and country**

### Adults

|                 |                                                   |
|-----------------|---------------------------------------------------|
| Web-figure 3.1  | Oesophagus                                        |
| Web-figure 3.2  | Stomach                                           |
| Web-figure 3.3  | Colon                                             |
| Web-figure 3.4  | Rectum                                            |
| Web-figure 3.5  | Liver                                             |
| Web-figure 3.6  | Pancreas                                          |
| Web-figure 3.7  | Lung                                              |
| Web-figure 3.8  | Melanoma of the skin                              |
| Web-figure 3.9  | Breast (women) [also as Figure 3 in main article] |
| Web-figure 3.10 | Cervix                                            |
| Web-figure 3.11 | Ovary                                             |
| Web-figure 3.12 | Prostate                                          |
| Web-figure 3.13 | Brain tumours                                     |
| Web-figure 3.14 | Myeloid malignancies                              |
| Web-figure 3.15 | Lymphoid malignancies                             |

### Children

|                 |                                     |
|-----------------|-------------------------------------|
| Web-figure 3.16 | Brain tumours                       |
| Web-figure 3.17 | Acute lymphoblastic leukaemia (ALL) |
| Web-figure 3.18 | Lymphomas                           |

Where data were available for more than one registry in a given country, the survival estimates are derived by pooling the data for that country, but excluding data from registries for which the estimates for that cancer are considered less reliable (see text).

Estimates for 1995-99 are not available for oesophagus, pancreas, melanoma of the skin, brain tumours (adults or children) or leukaemias (adults). The definition of ALL has changed over time.

§ Continent or continental region with one or more national estimates flagged as less reliable.

Standard ISO abbreviations for country names: Algeria - DZA; Argentina - ARG; Australia - AUS; Austria - AUT; Belarus - BLR; Belgium - BEL; Brazil - BRA; Bulgaria - BGR; Canada - CAN; Chile - CHL; China - CHN; Colombia - COL; Costa Rica - CRI; Croatia - HRV; Cuba - CUB; Cyprus - CYP; Czech Republic - CZE; Denmark - DNK; Ecuador - ECU; Estonia - EST; Finland - FIN; France - FRA; Germany - DEU; Gibraltar - GIB; Greece - GRC; Guadeloupe - GLP; Hong Kong SAR - HKG; Iceland - ISL; India - IND; Iran - IRN; Ireland - IRL; Israel - ISR; Italy - ITA; Japan - JPN; Jordan - JOR; Kuwait - KWT; Latvia - LVA; Lithuania - LTU; Malaysia - MYS; Malta - MLT; Martinique - MTQ; Mauritius - MUS; Mexico - MEX; Mongolia - MNG; Morocco - MAR; Netherlands - NLD; New Zealand - NZL; Nigeria - NGA; Norway - NOR; Peru - PER; Poland - POL; Portugal - PRT; Puerto Rico - PRI; Qatar - QAT; Republic of Korea - KOR; Romania - ROU; Russian Federation - RUS; Singapore - SGP; Slovakia - SVK; Slovenia - SVN; South Africa - ZAF; Spain - ESP; Sweden - SWE; Switzerland - CHE; Taiwan - TWN; Thailand - THA; Turkey - TUR; United Kingdom of Great Britain and Northern Ireland - GBR; United States of America - USA; Uruguay - URY

**Web-figure 3.1: Oesophagus** - Trends in age-standardised five-year net survival (%) for adults (15-99 years) diagnosed during 2000-2004, 2005-2009 and 2010-2014, by continent (or continental region) and country.

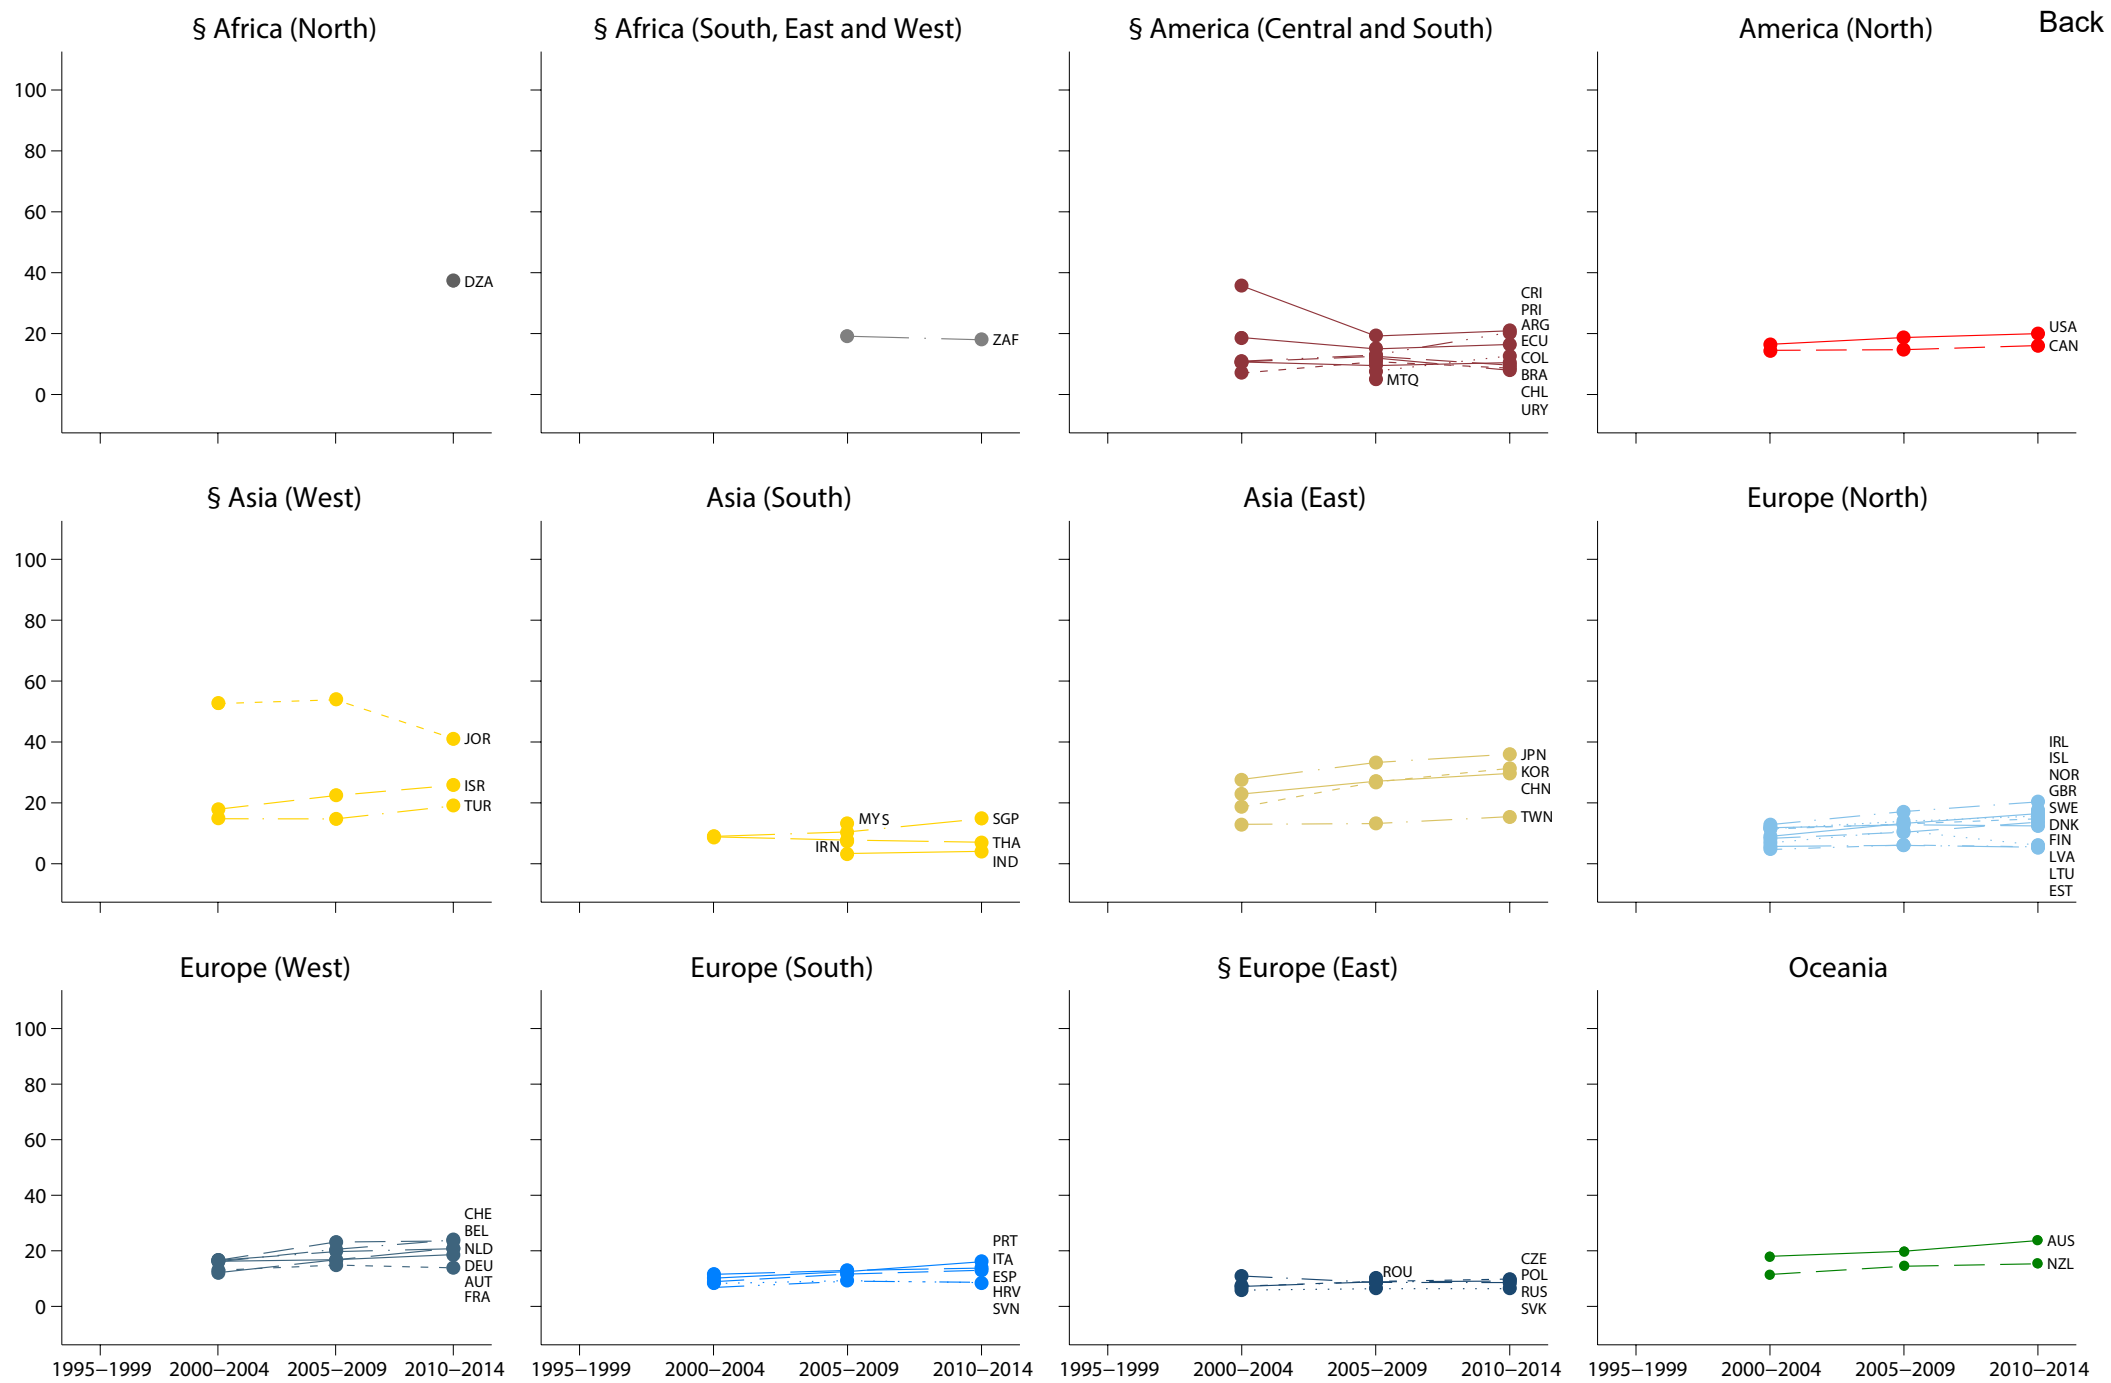

§ Continent or continental region with one or more national estimates flagged as less reliable.

**Web-figure 3.2: Stomach** - Trends in age-standardised five-year net survival (%) for adults (15-99 years) diagnosed 1995-1999, 2000-2004, 2005-2009 and 2010-2014, by continent (or continental region) and country.

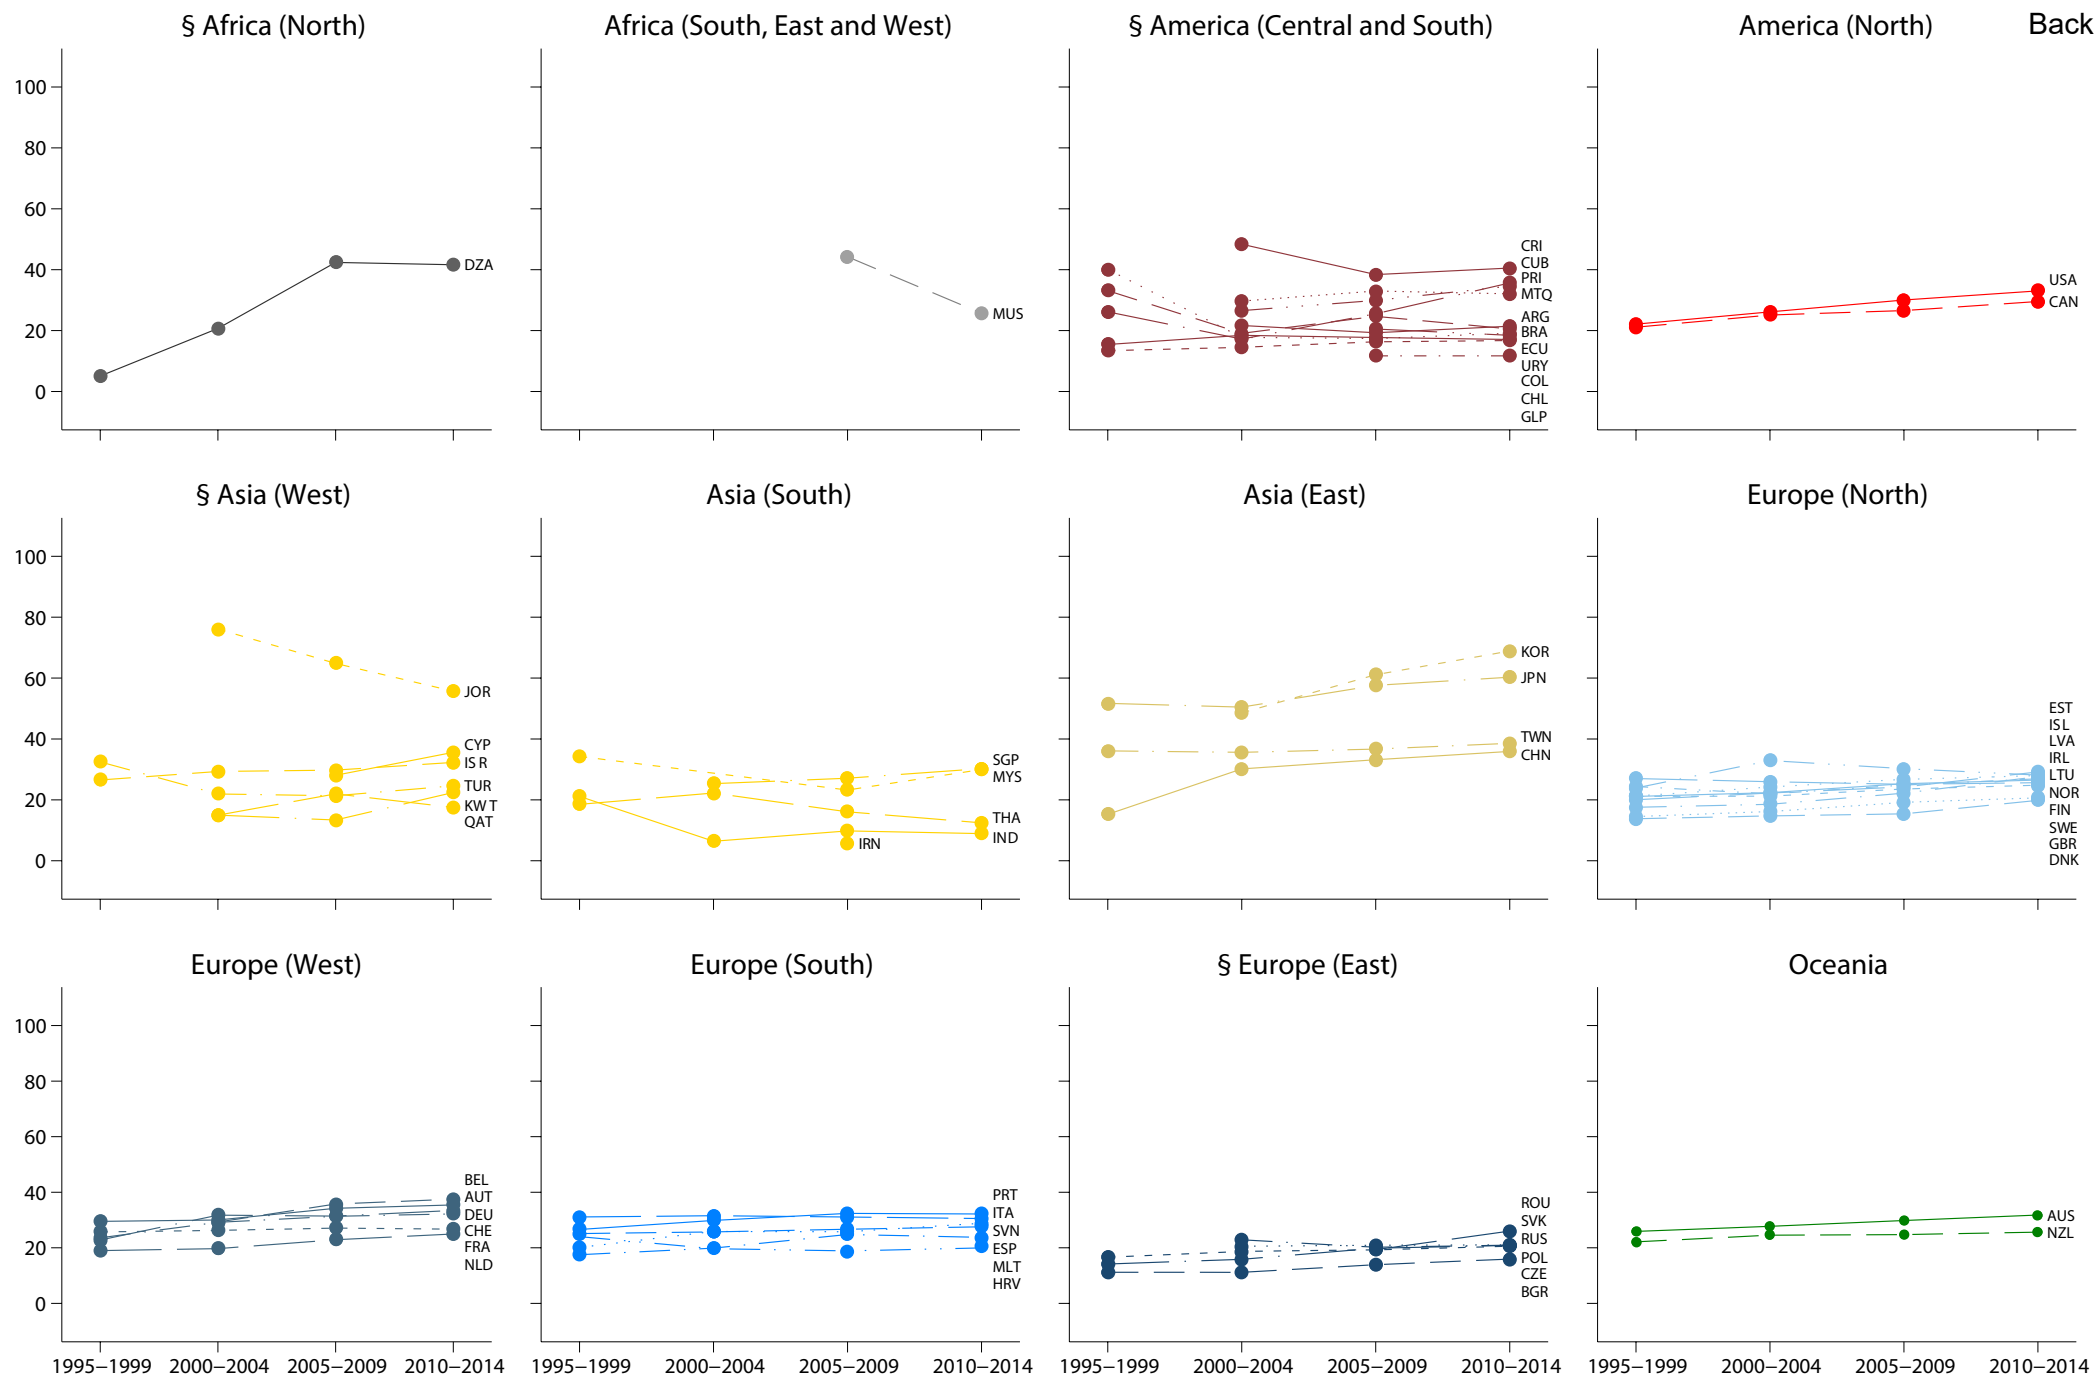

§ Continent or continental region with one or more national estimates flagged as less reliable.

**Web-figure 3.3: Colon** - Trends in age-standardised five-year net survival (%) for adults (15-99 years) diagnosed 1995-1999, 2000-2004, 2005-2009 and 2010-2014, by continent (or continental region) and country.

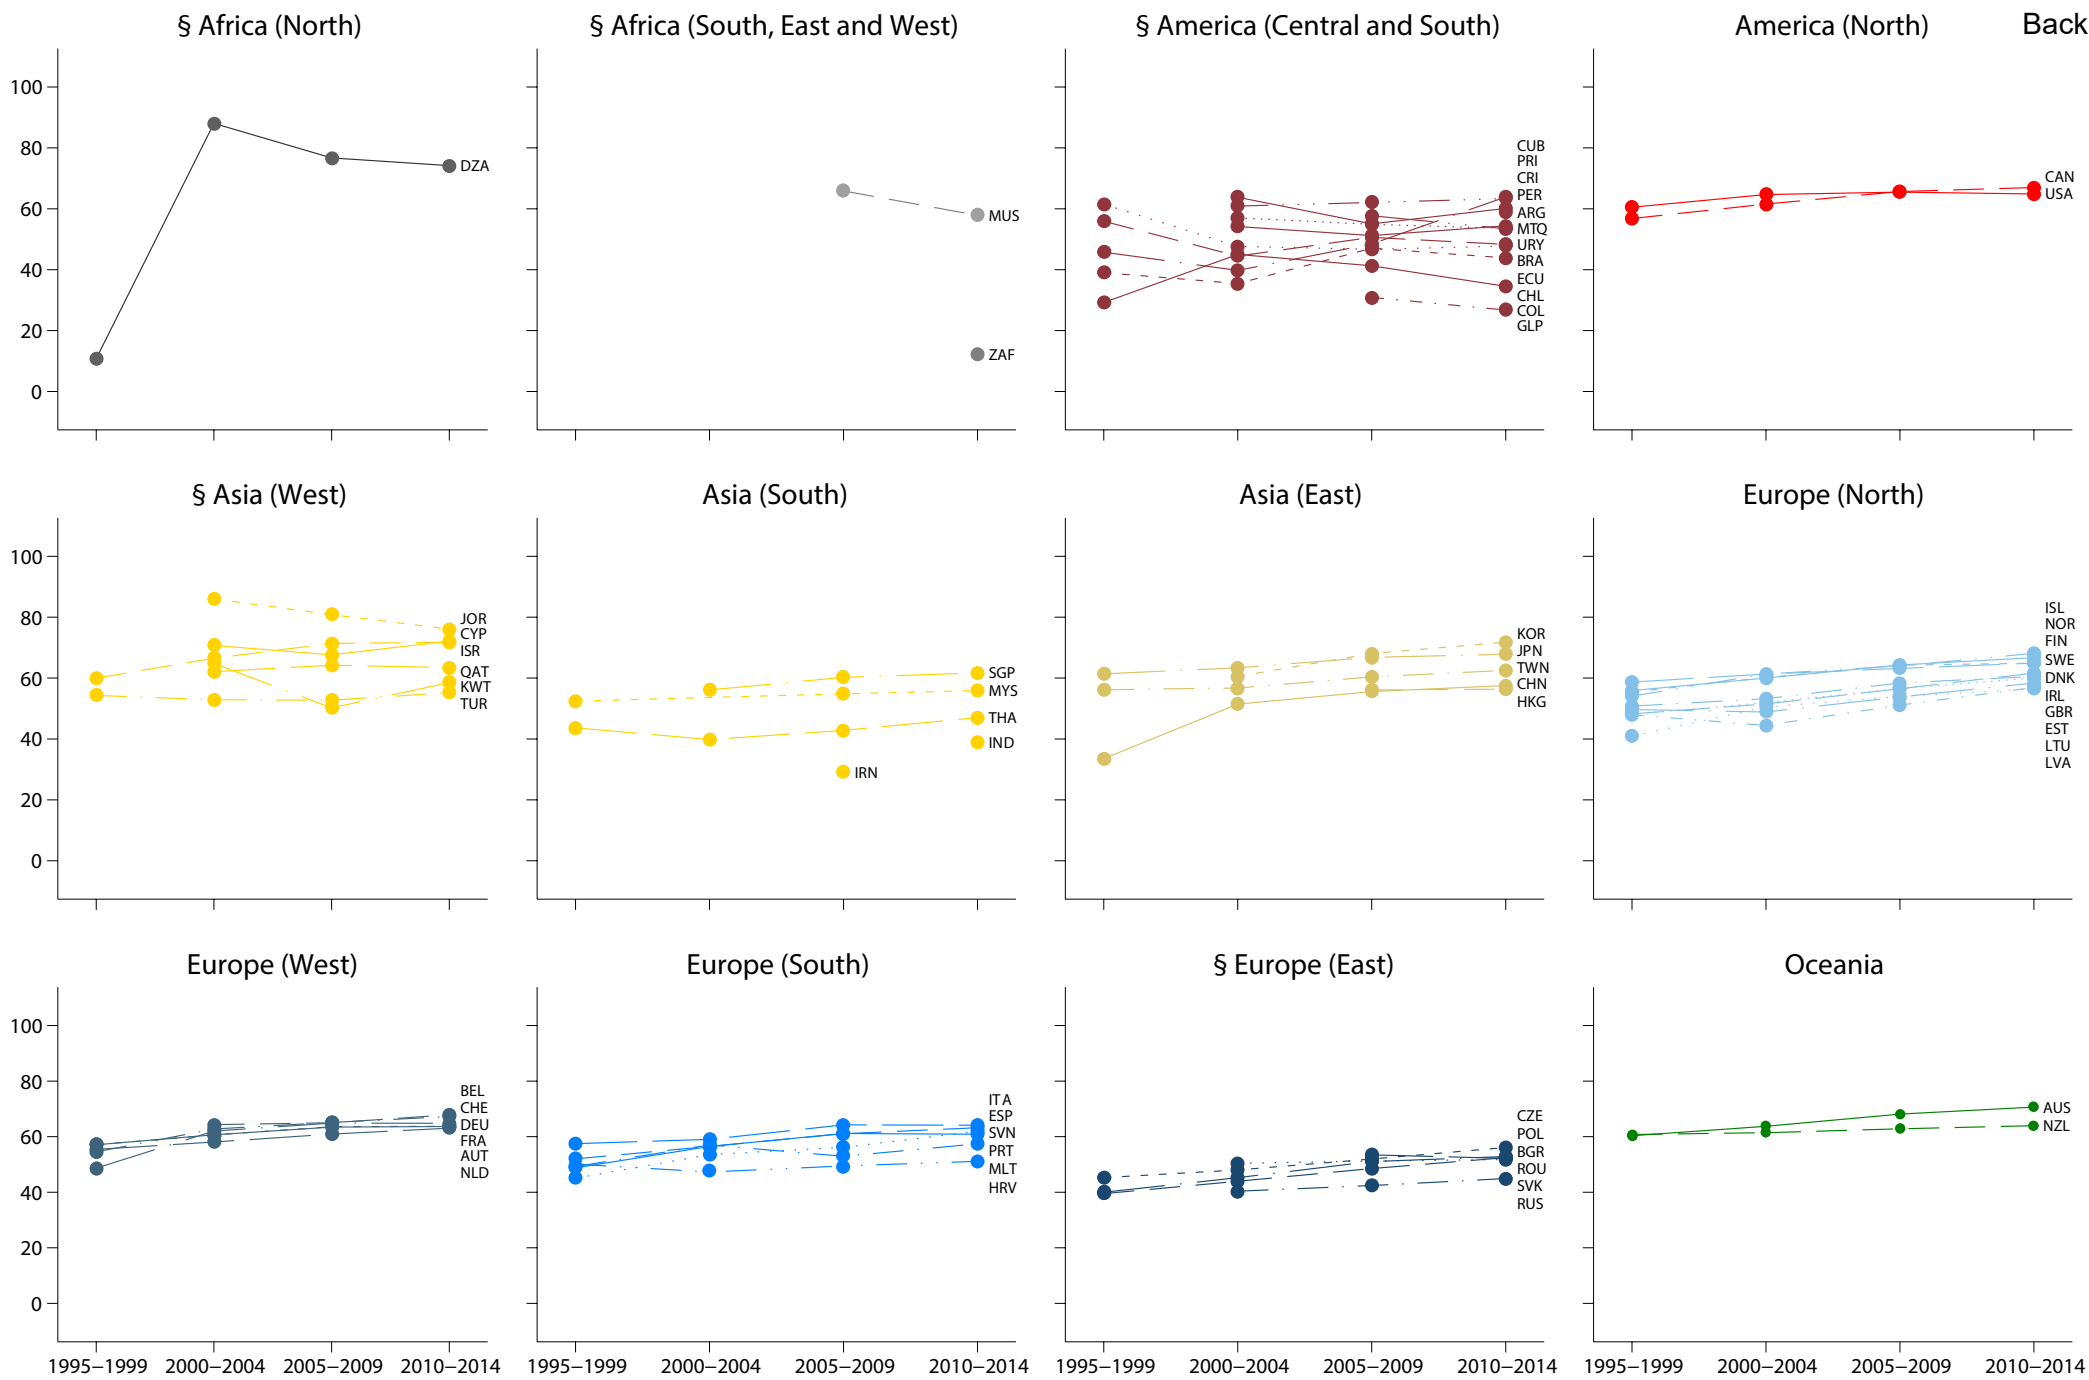

§ Continent or continental region with one or more national estimates flagged as less reliable.

**Web-figure 3.4: Rectum** - Trends in age-standardised five-year net survival (%) for adults (15-99 years) diagnosed 1995-1999, 2000-2004, 2005-2009 and 2010-2014, by continent (or continental region) and country.

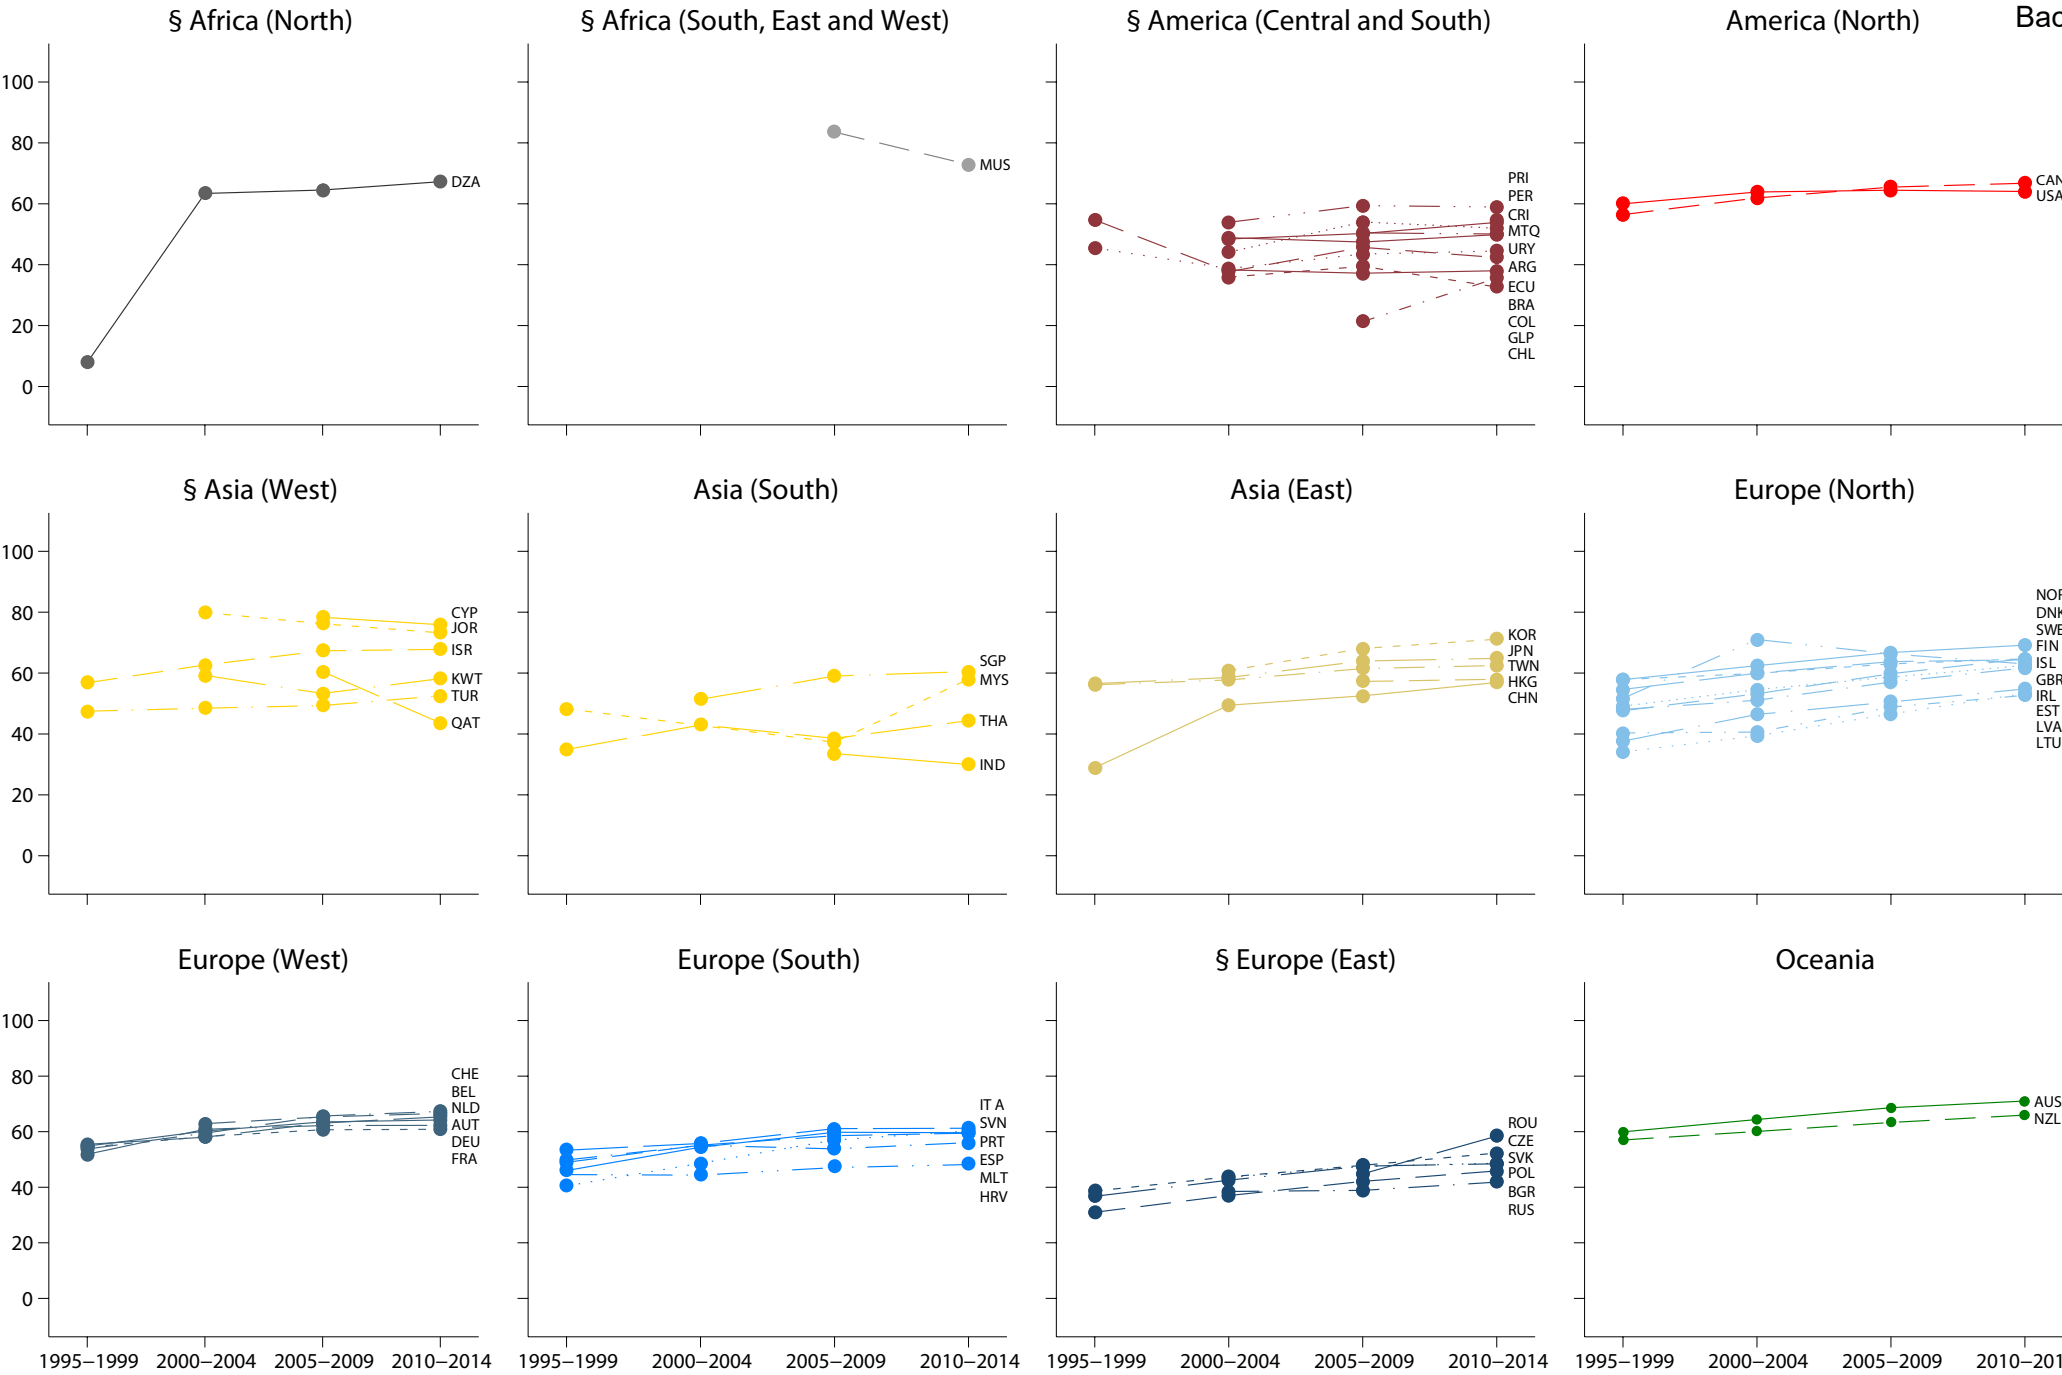

§ Continent or continental region with one or more national estimates flagged as less reliable.

**Web-figure 3.5: Liver** - Trends in age-standardised five-year net survival (%) for adults (15-99 years) diagnosed during 2000-2004, 2005-2009 and 2010-2014, by continent (or continental region) and country.

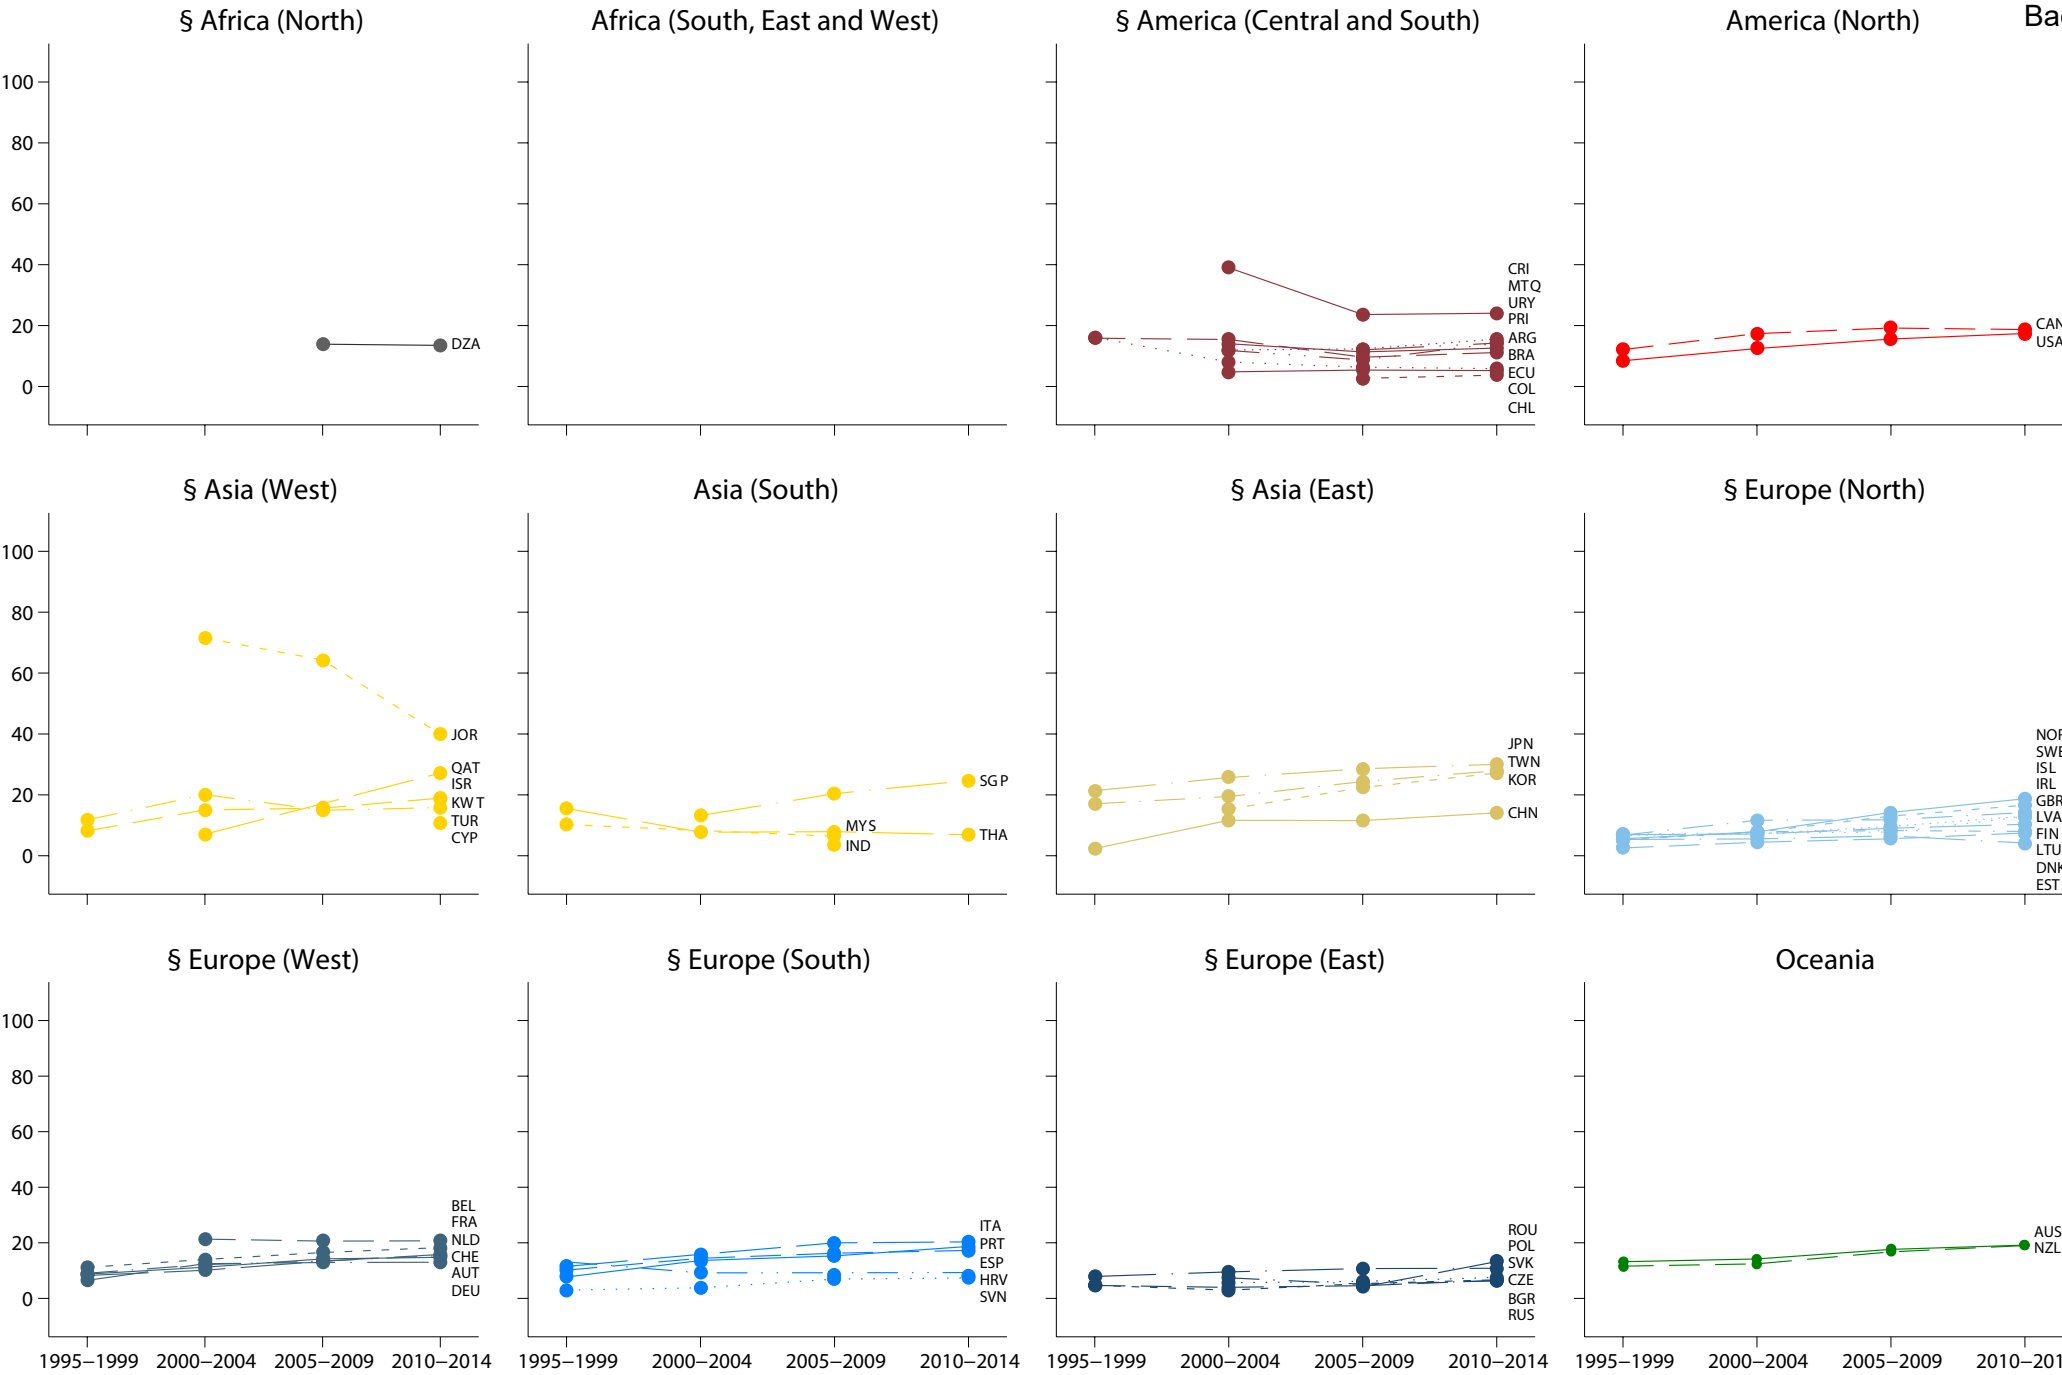

**Web-figure 3.6: Pancreas** - Trends in age-standardised five-year net survival (%) for adults (15-99 years) diagnosed during 2000-2004, 2005-2009 and 2010-2014, by continent (or continental region) and country.

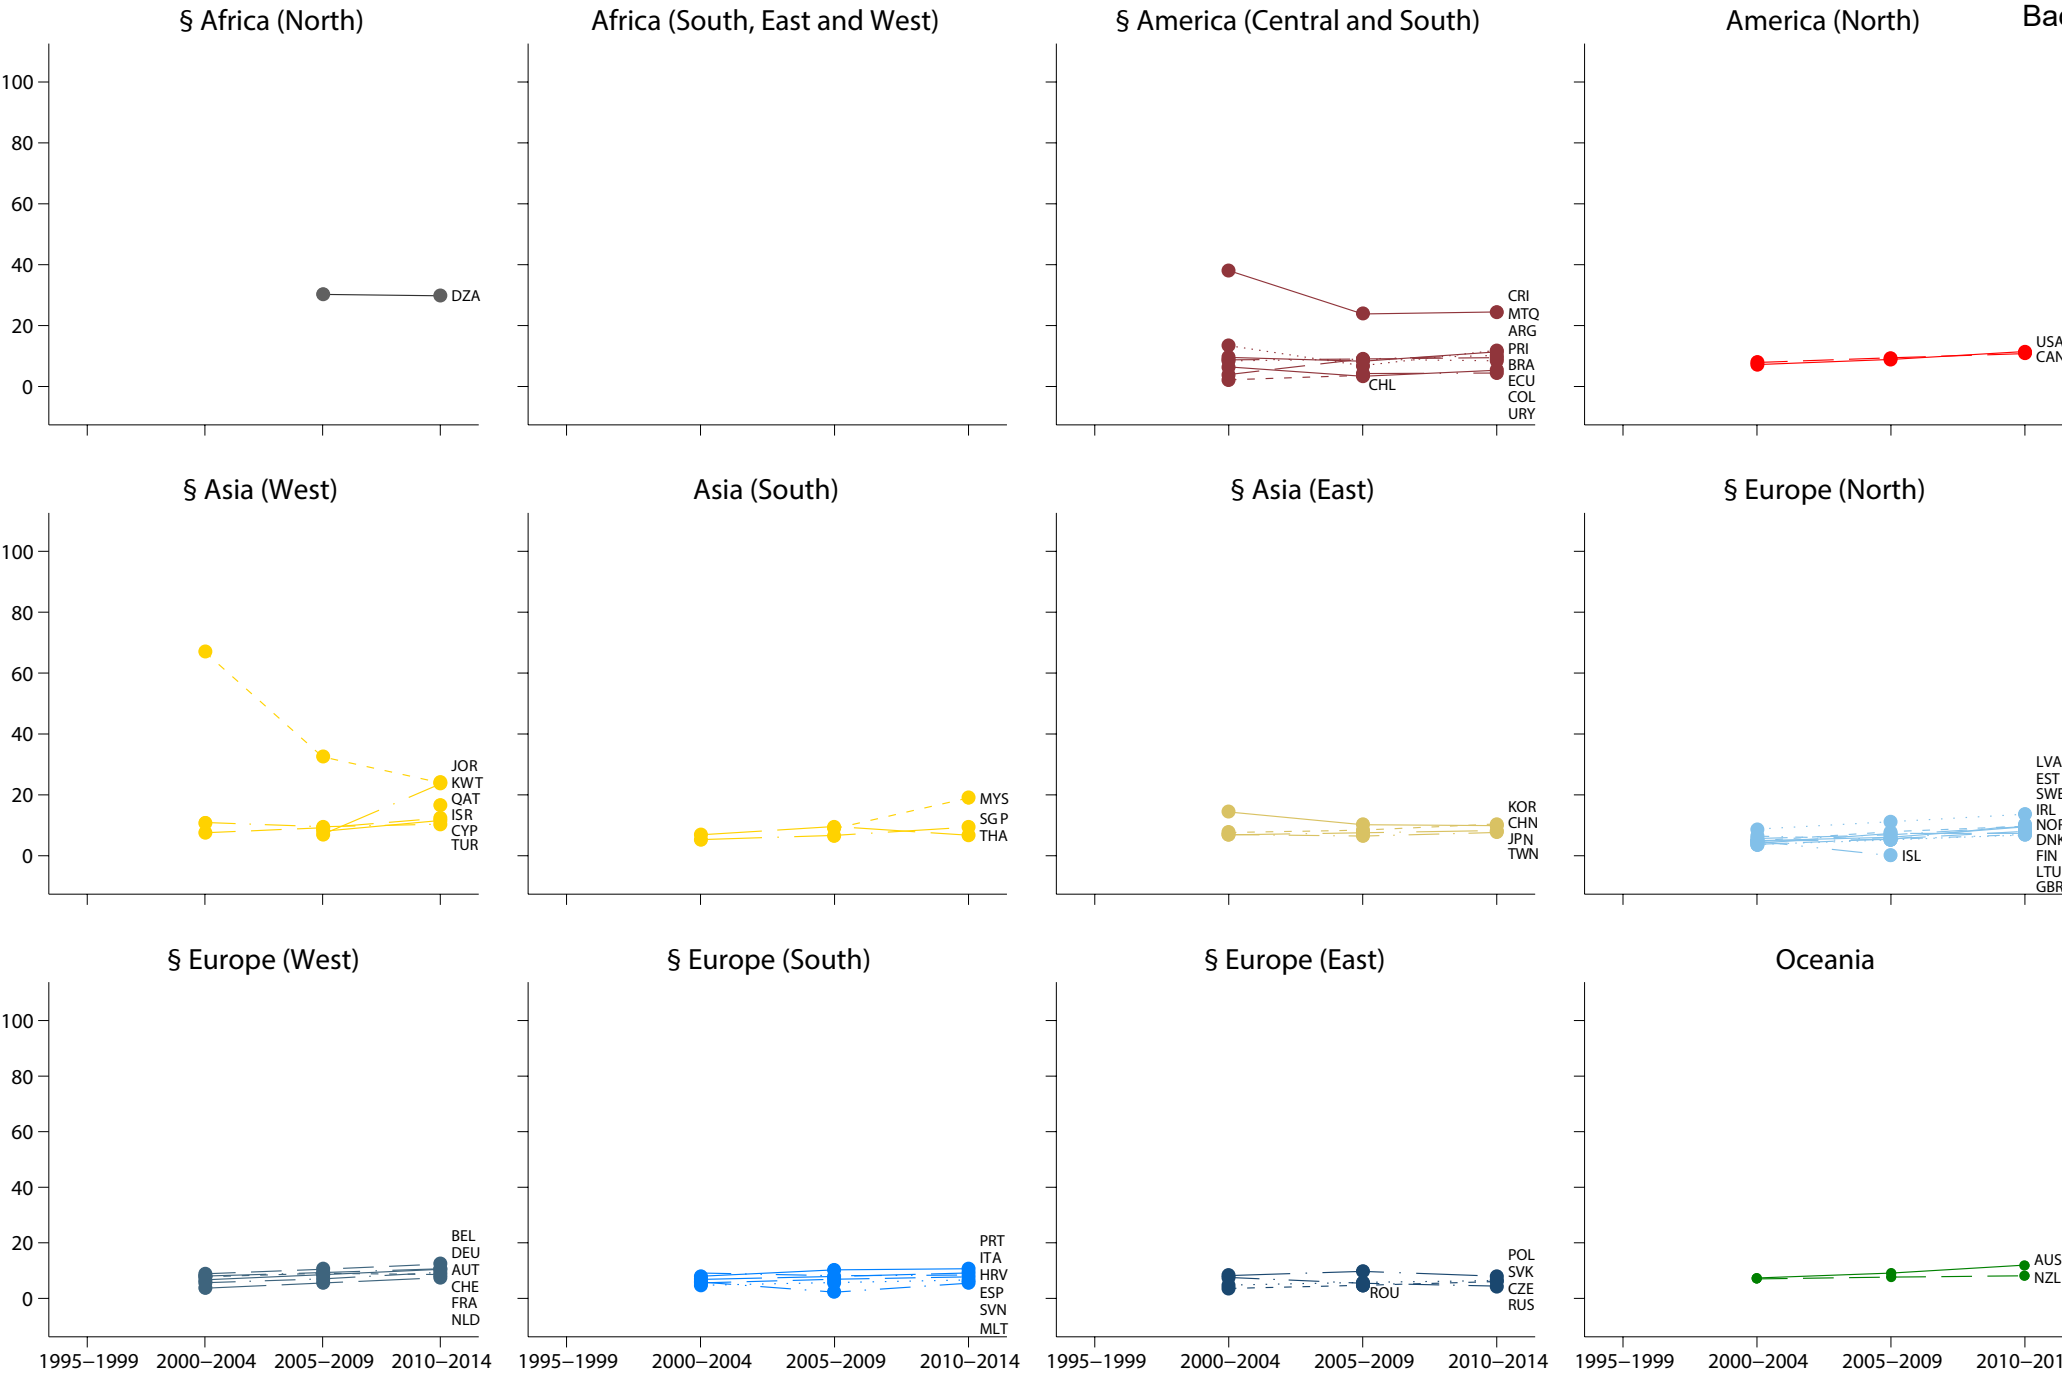

§ Continent or continental region with one or more national estimates flagged as less reliable.

**Web-figure 3.7: Lung** - Trends in age-standardised five-year net survival (%) for adults (15-99 years) diagnosed during 1995-1999, 2000-2004, 2005-2009 and 2010-2014, by continent (or continental region) and country.

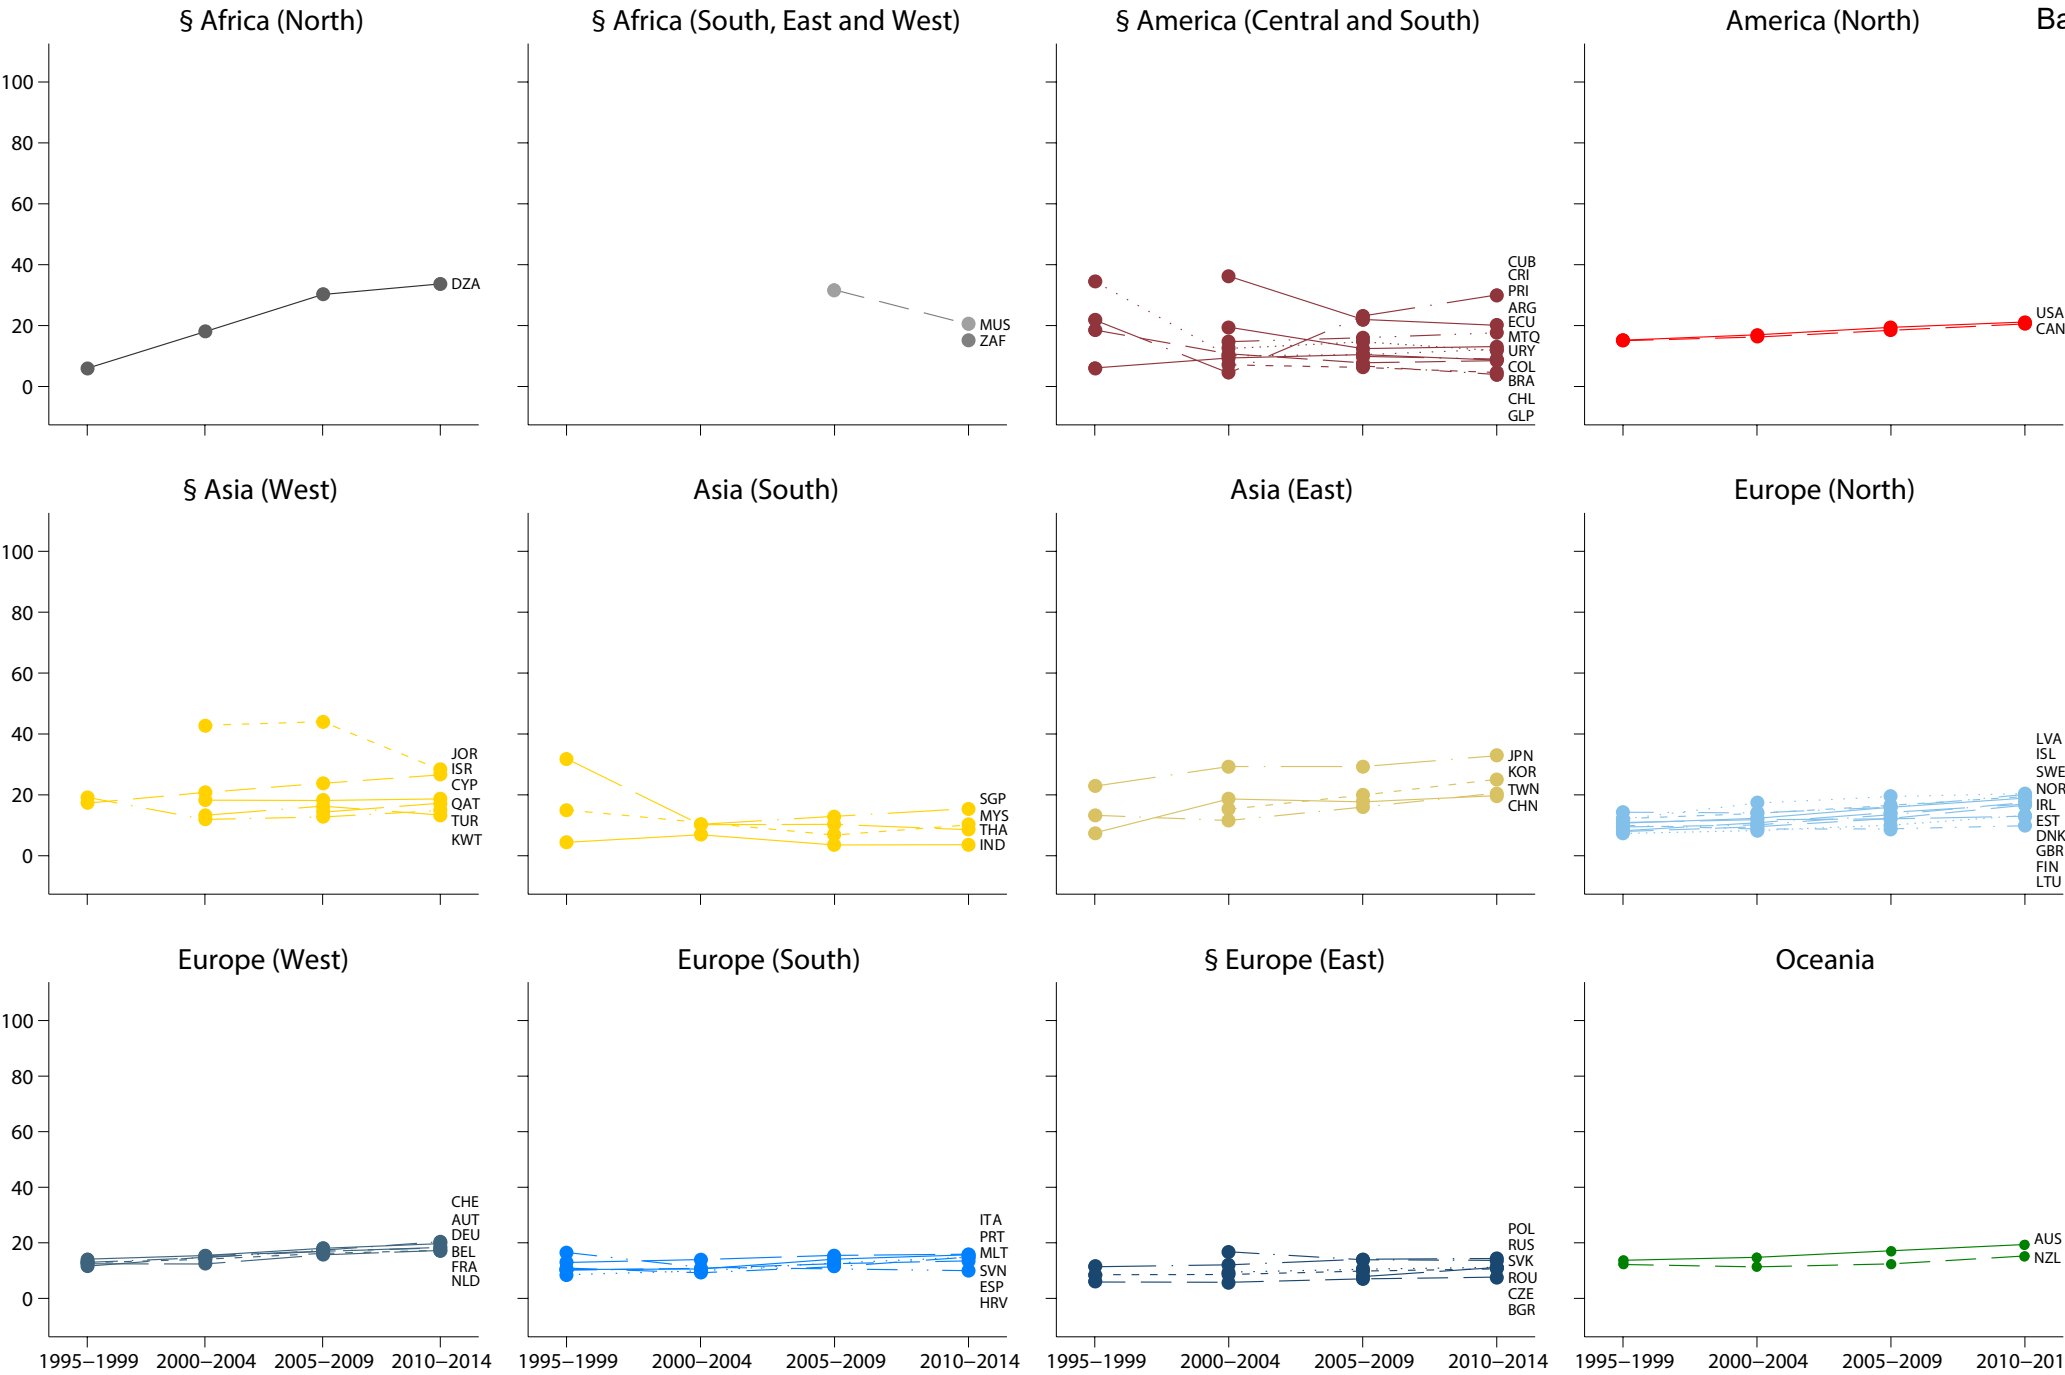

§ Continent or continental region with one or more national estimates flagged as less reliable.

**Web-figure 3.8: Melanoma of the skin** - Trends in age-standardised five-year net survival (%) for adults (15-99 years) diagnosed during 2000-2004, 2005-2009 and 2010-2014, by continent (or continental region) and country.

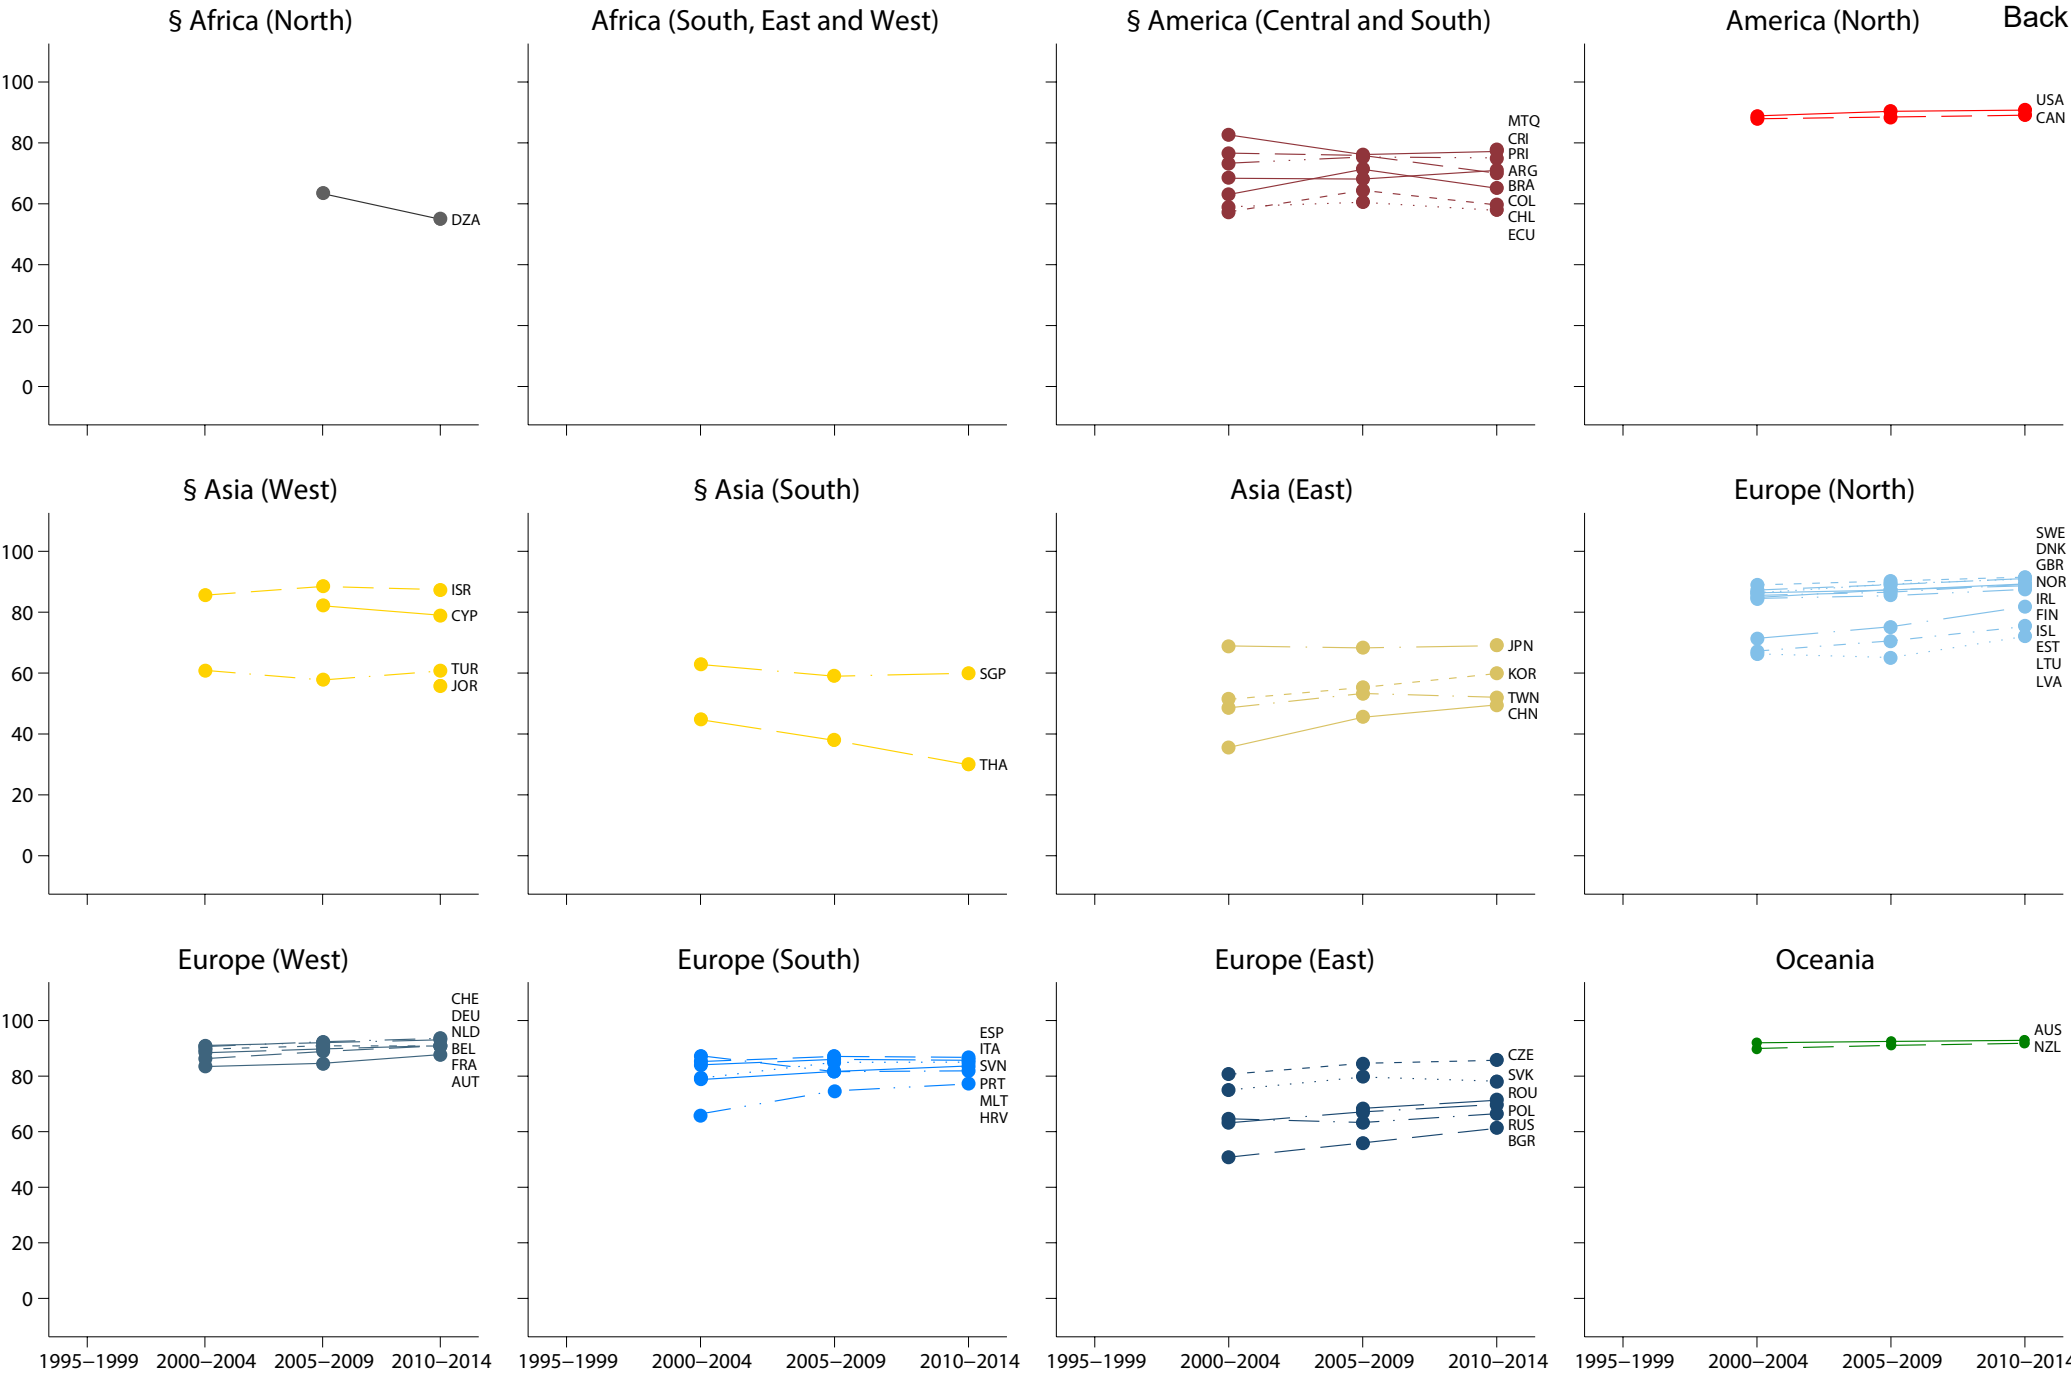

§ Continent or continental region with one or more national estimates flagged as less reliable.

**Web-figure 3.9: Breast (women)** - Trends in age-standardised five-year net survival (%) for women (15-99 years) diagnosed during 1995-1999, 2000-2004, 2005-2009 and 2010-2014, by continent (or continental region) and country.

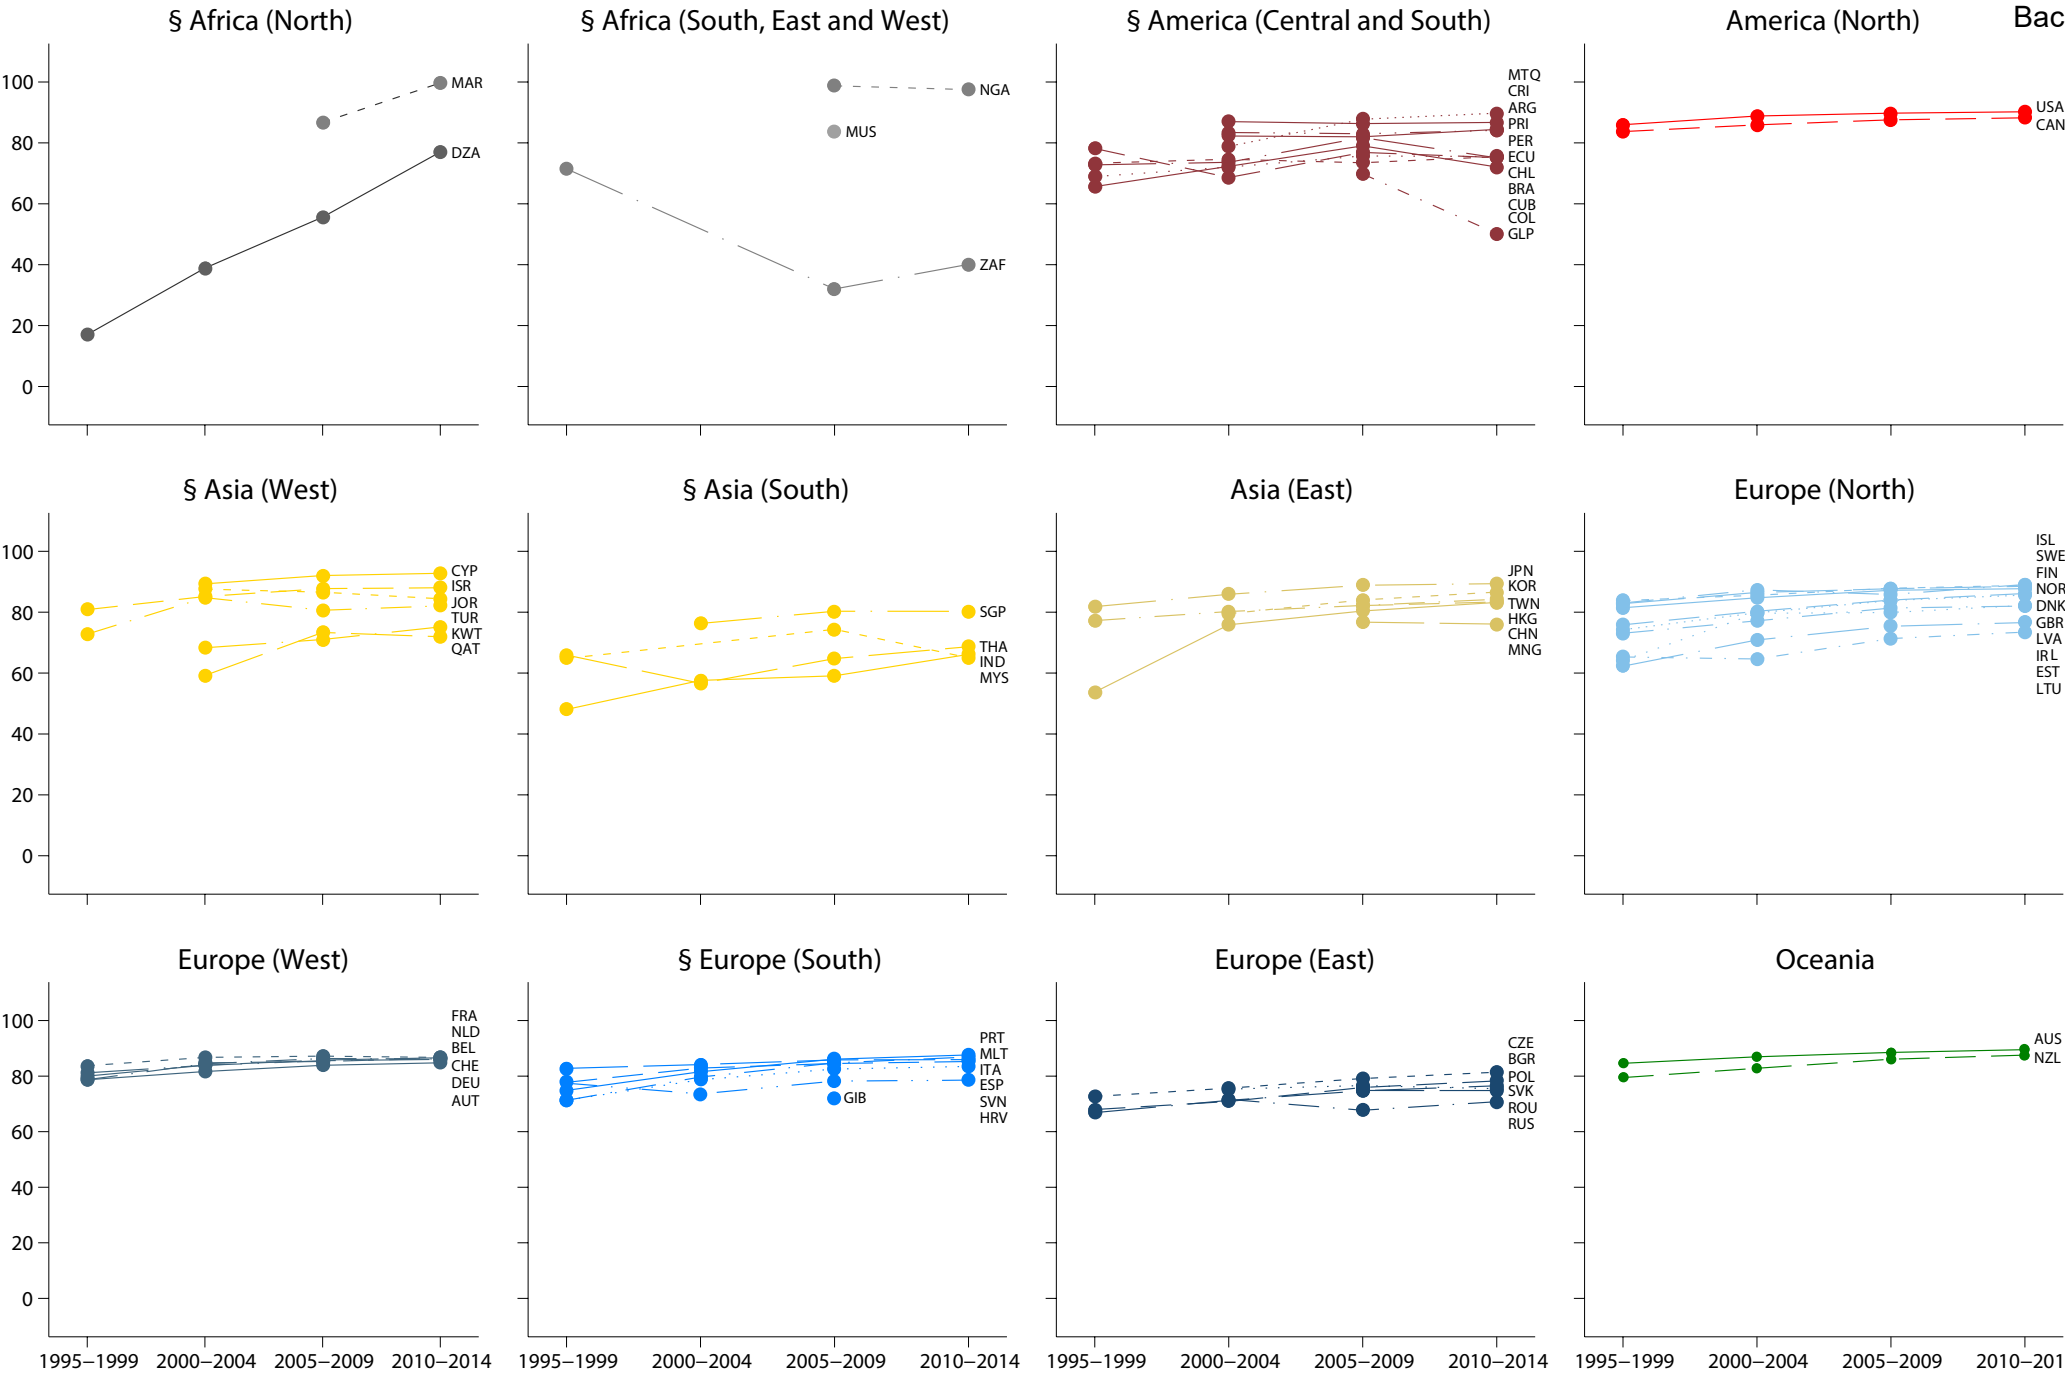

§ Continent or continental region with one or more national estimates flagged as less reliable.

**Web-figure 3.10: Cervix** - Trends in age-standardised five-year net survival (%) for women (15-99 years) diagnosed during 1995-1999, 2000-2004, 2005-2009 and 2010-2014, by continent (or continental region) and country.

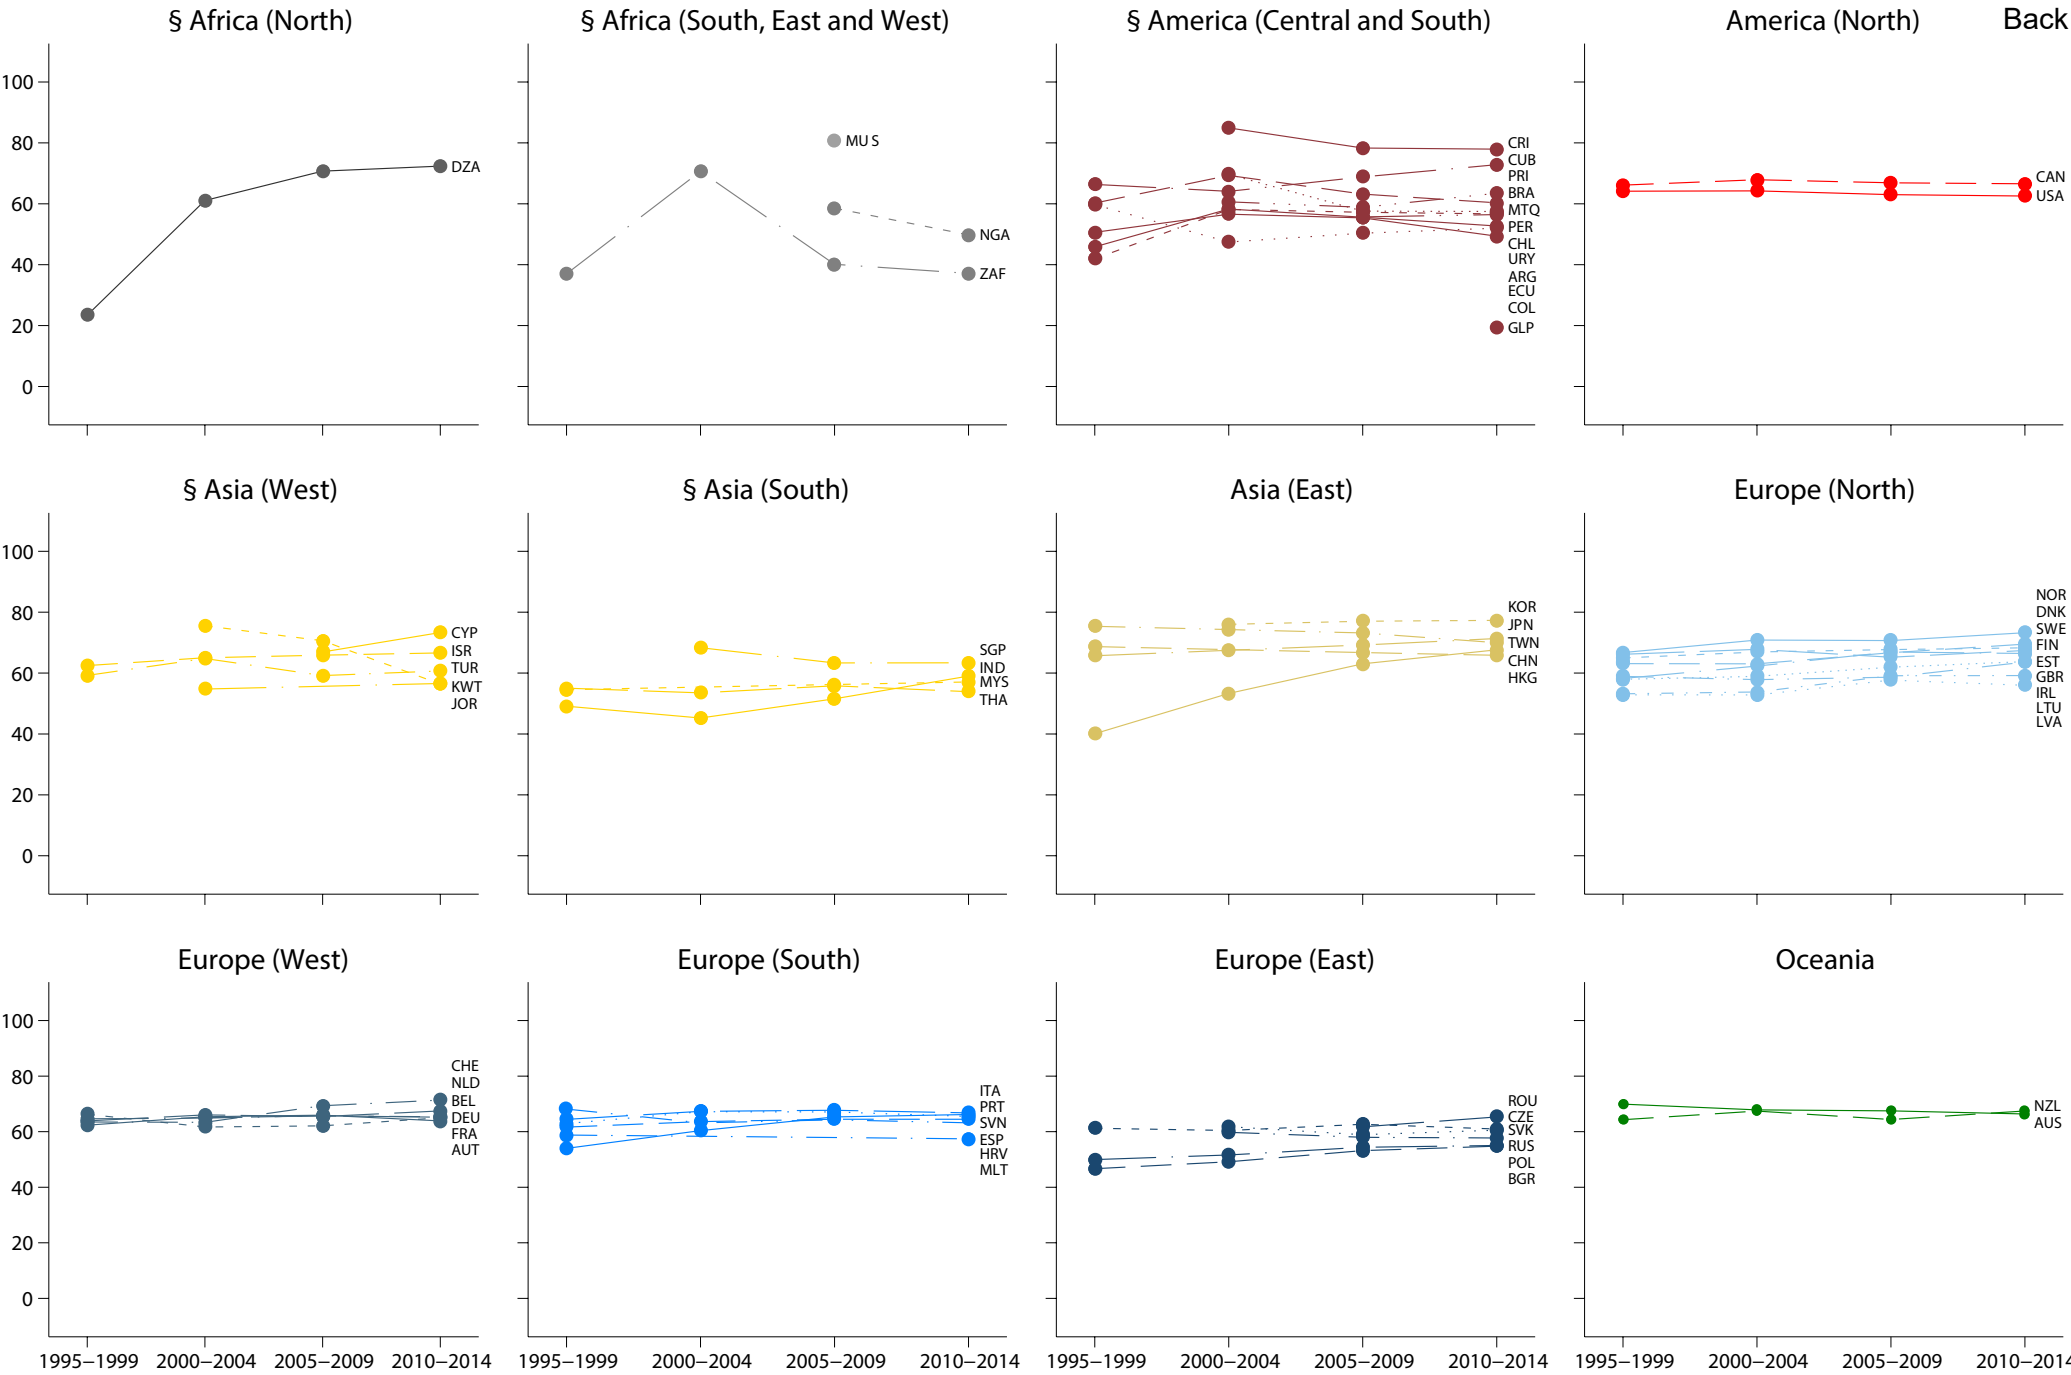

§ Continent or continental region with one or more national estimates flagged as less reliable.

**Web-figure 3.11: Ovary** - Trends in age-standardised five-year net survival (%) for women (15-99 years) diagnosed during 1995-1999, 2000-2004, 2005-2009 and 2010-2014, by continent (or continental region) and country.

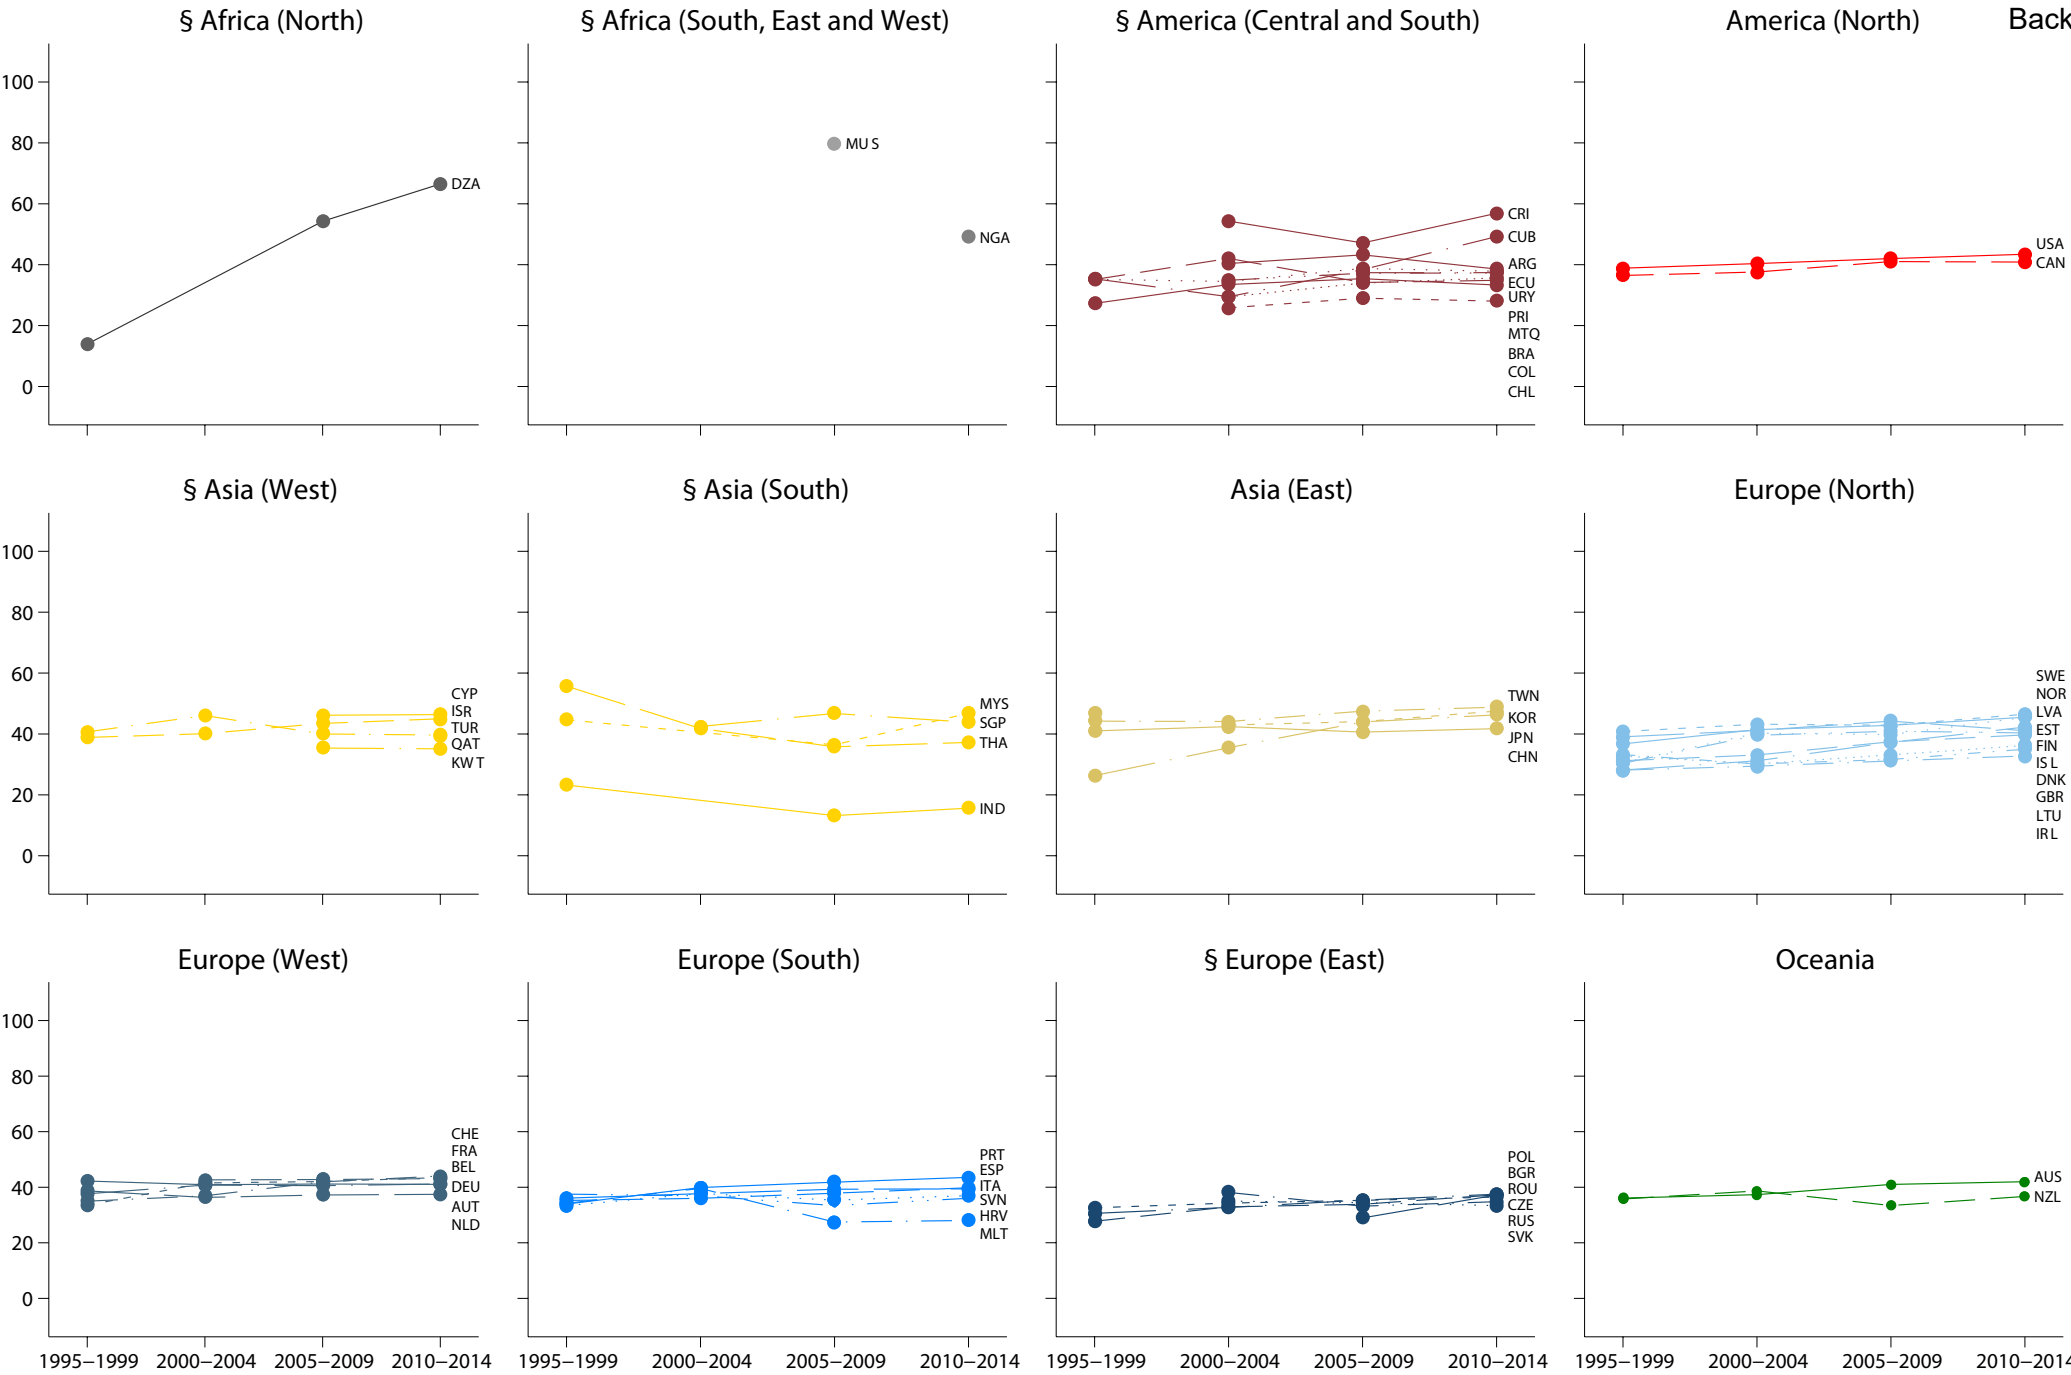

§ Continent or continental region with one or more national estimates flagged as less reliable.

**Web-figure 3.12: Prostate** - Trends in age-standardised five-year net survival (%) for men (15-99 years) diagnosed during 1995-1999, 2000-2004, 2005-2009 and 2010-2014, by continent (or continental region) and country.

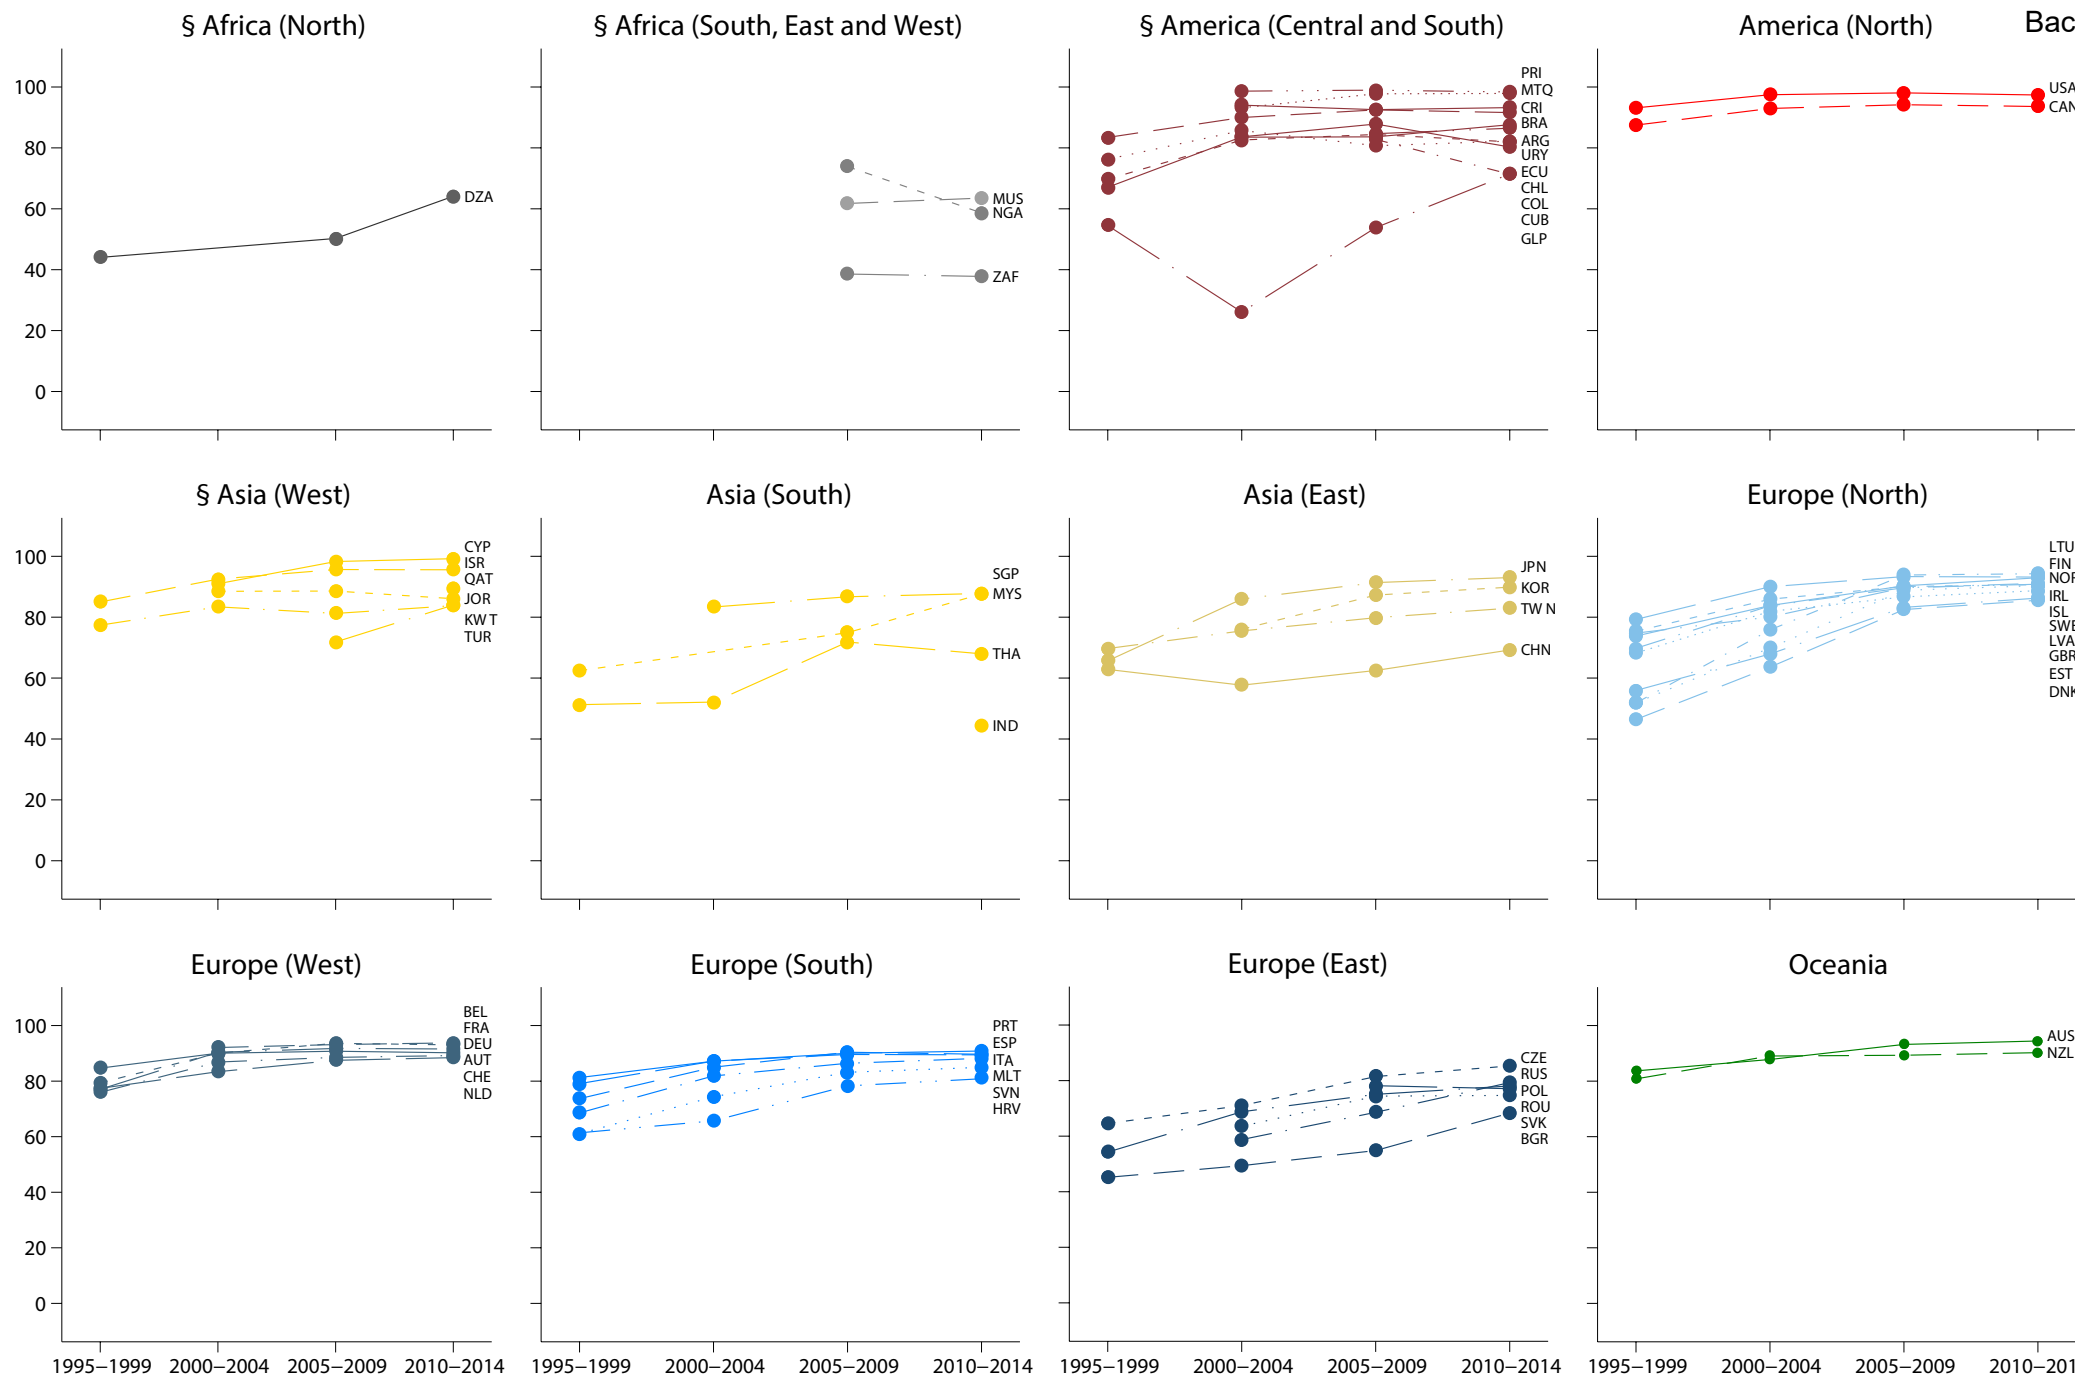

§ Continent or continental region with one or more national estimates flagged as less reliable.



**Web-figure 3.14: Myeloid malignancies** - Trends in age-standardised five-year net survival (%) for adults (15-99 years) diagnosed during 2000-2004, 2005-2009 and 2010-2014, by continent (or continental region) and country.

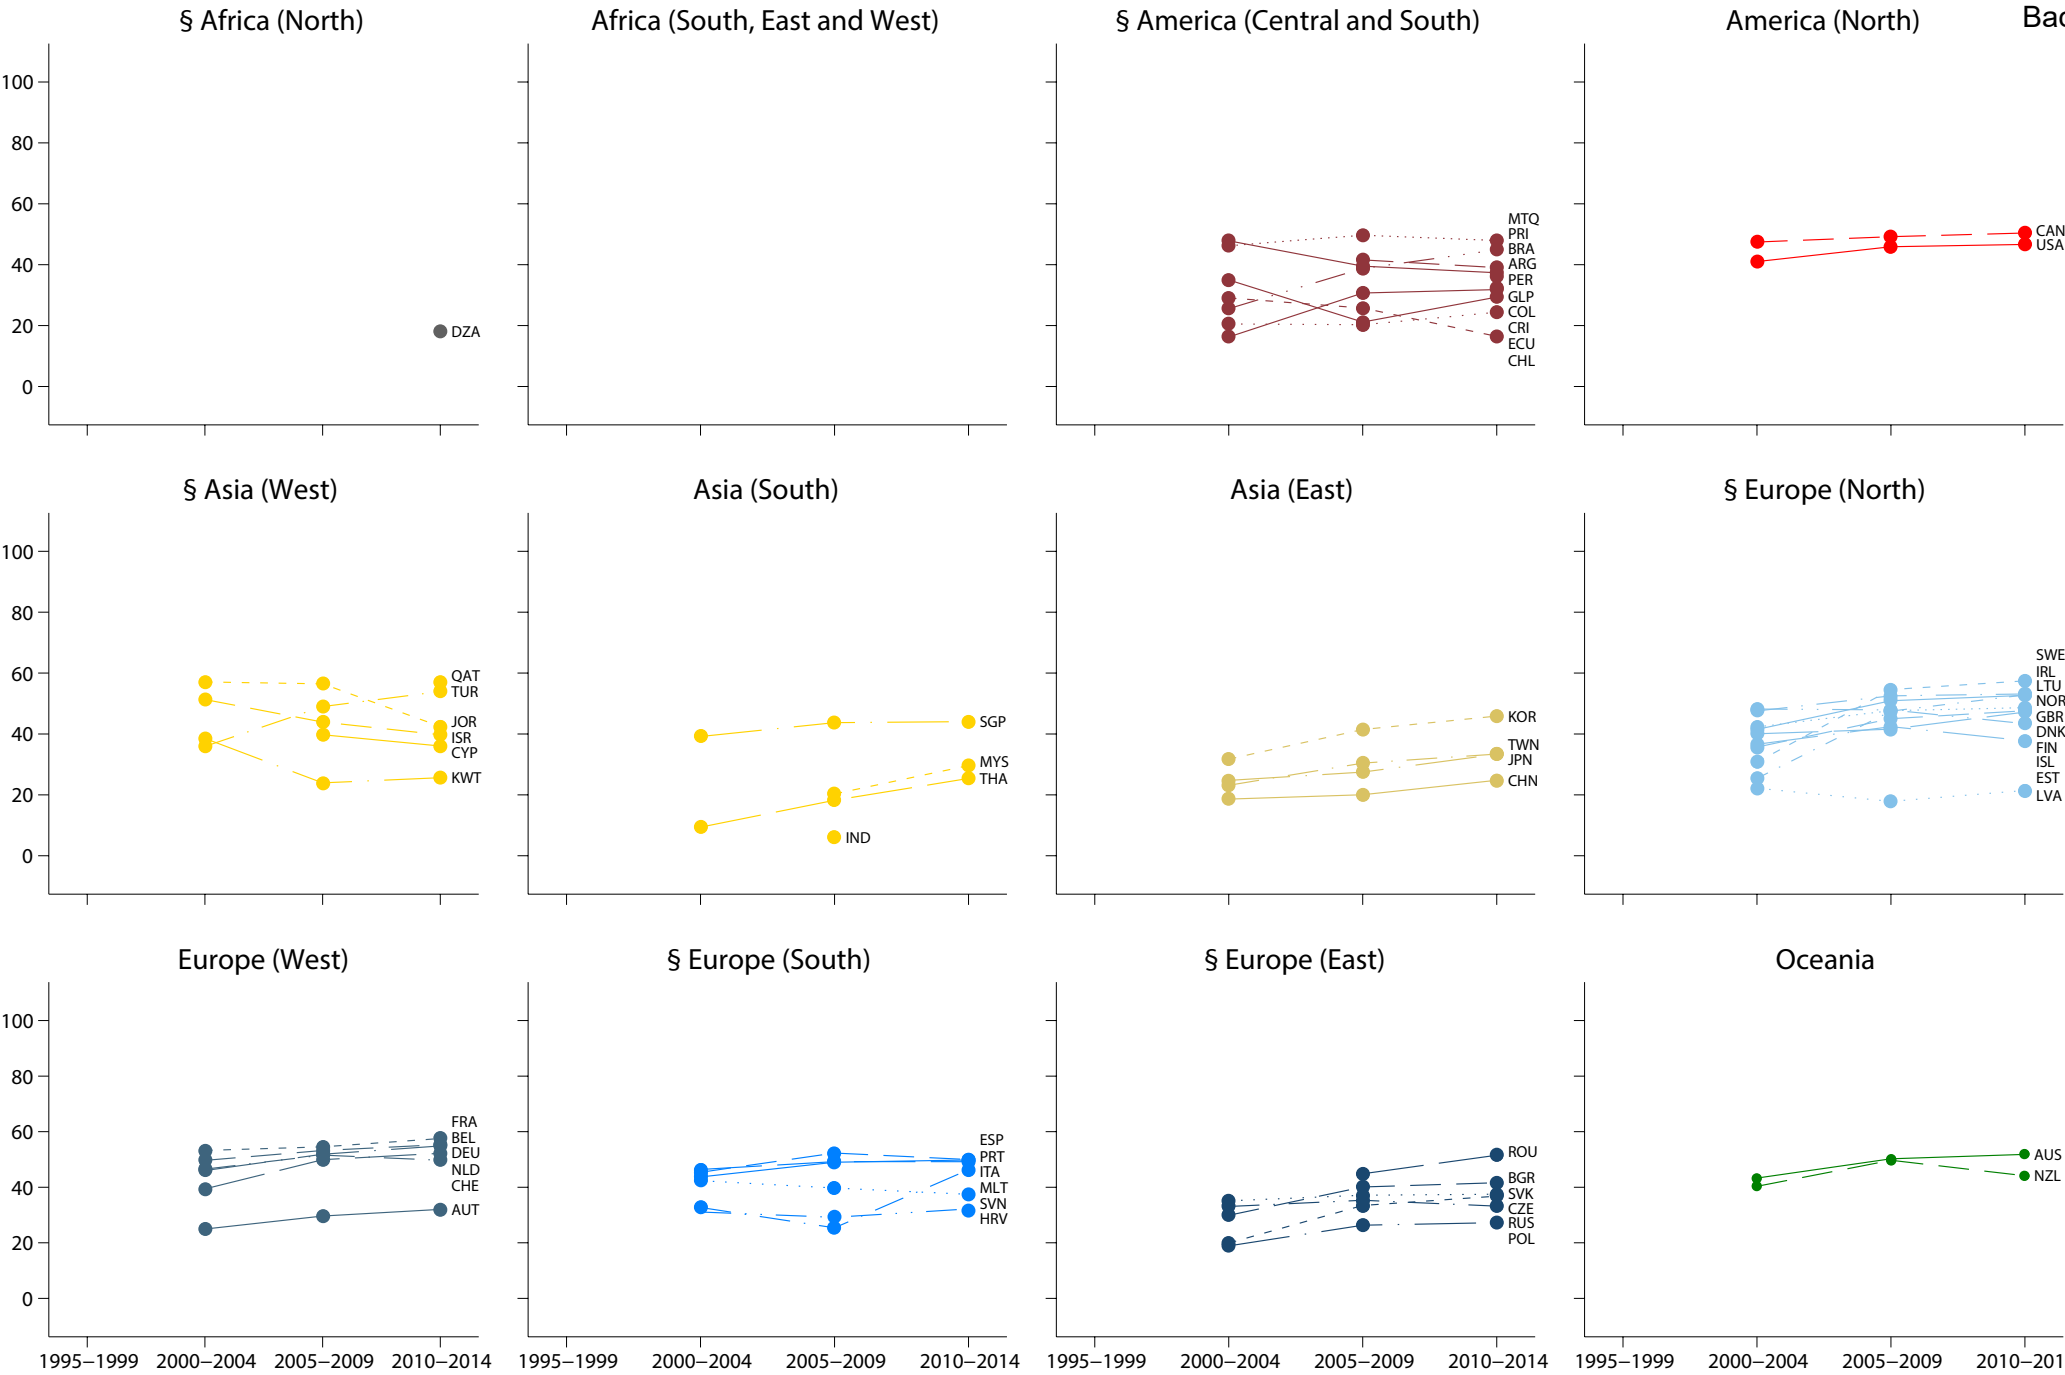

§ Continent or continental region with one or more national estimates flagged as less reliable.

**Web-figure 3.15: Lymphoid malignancies** - Trends in age-standardised five-year net survival (%) for adults (15-99 years) diagnosed during 2000-2004, 2005-2009 and 2010-2014, by continent (or continental region) and country.

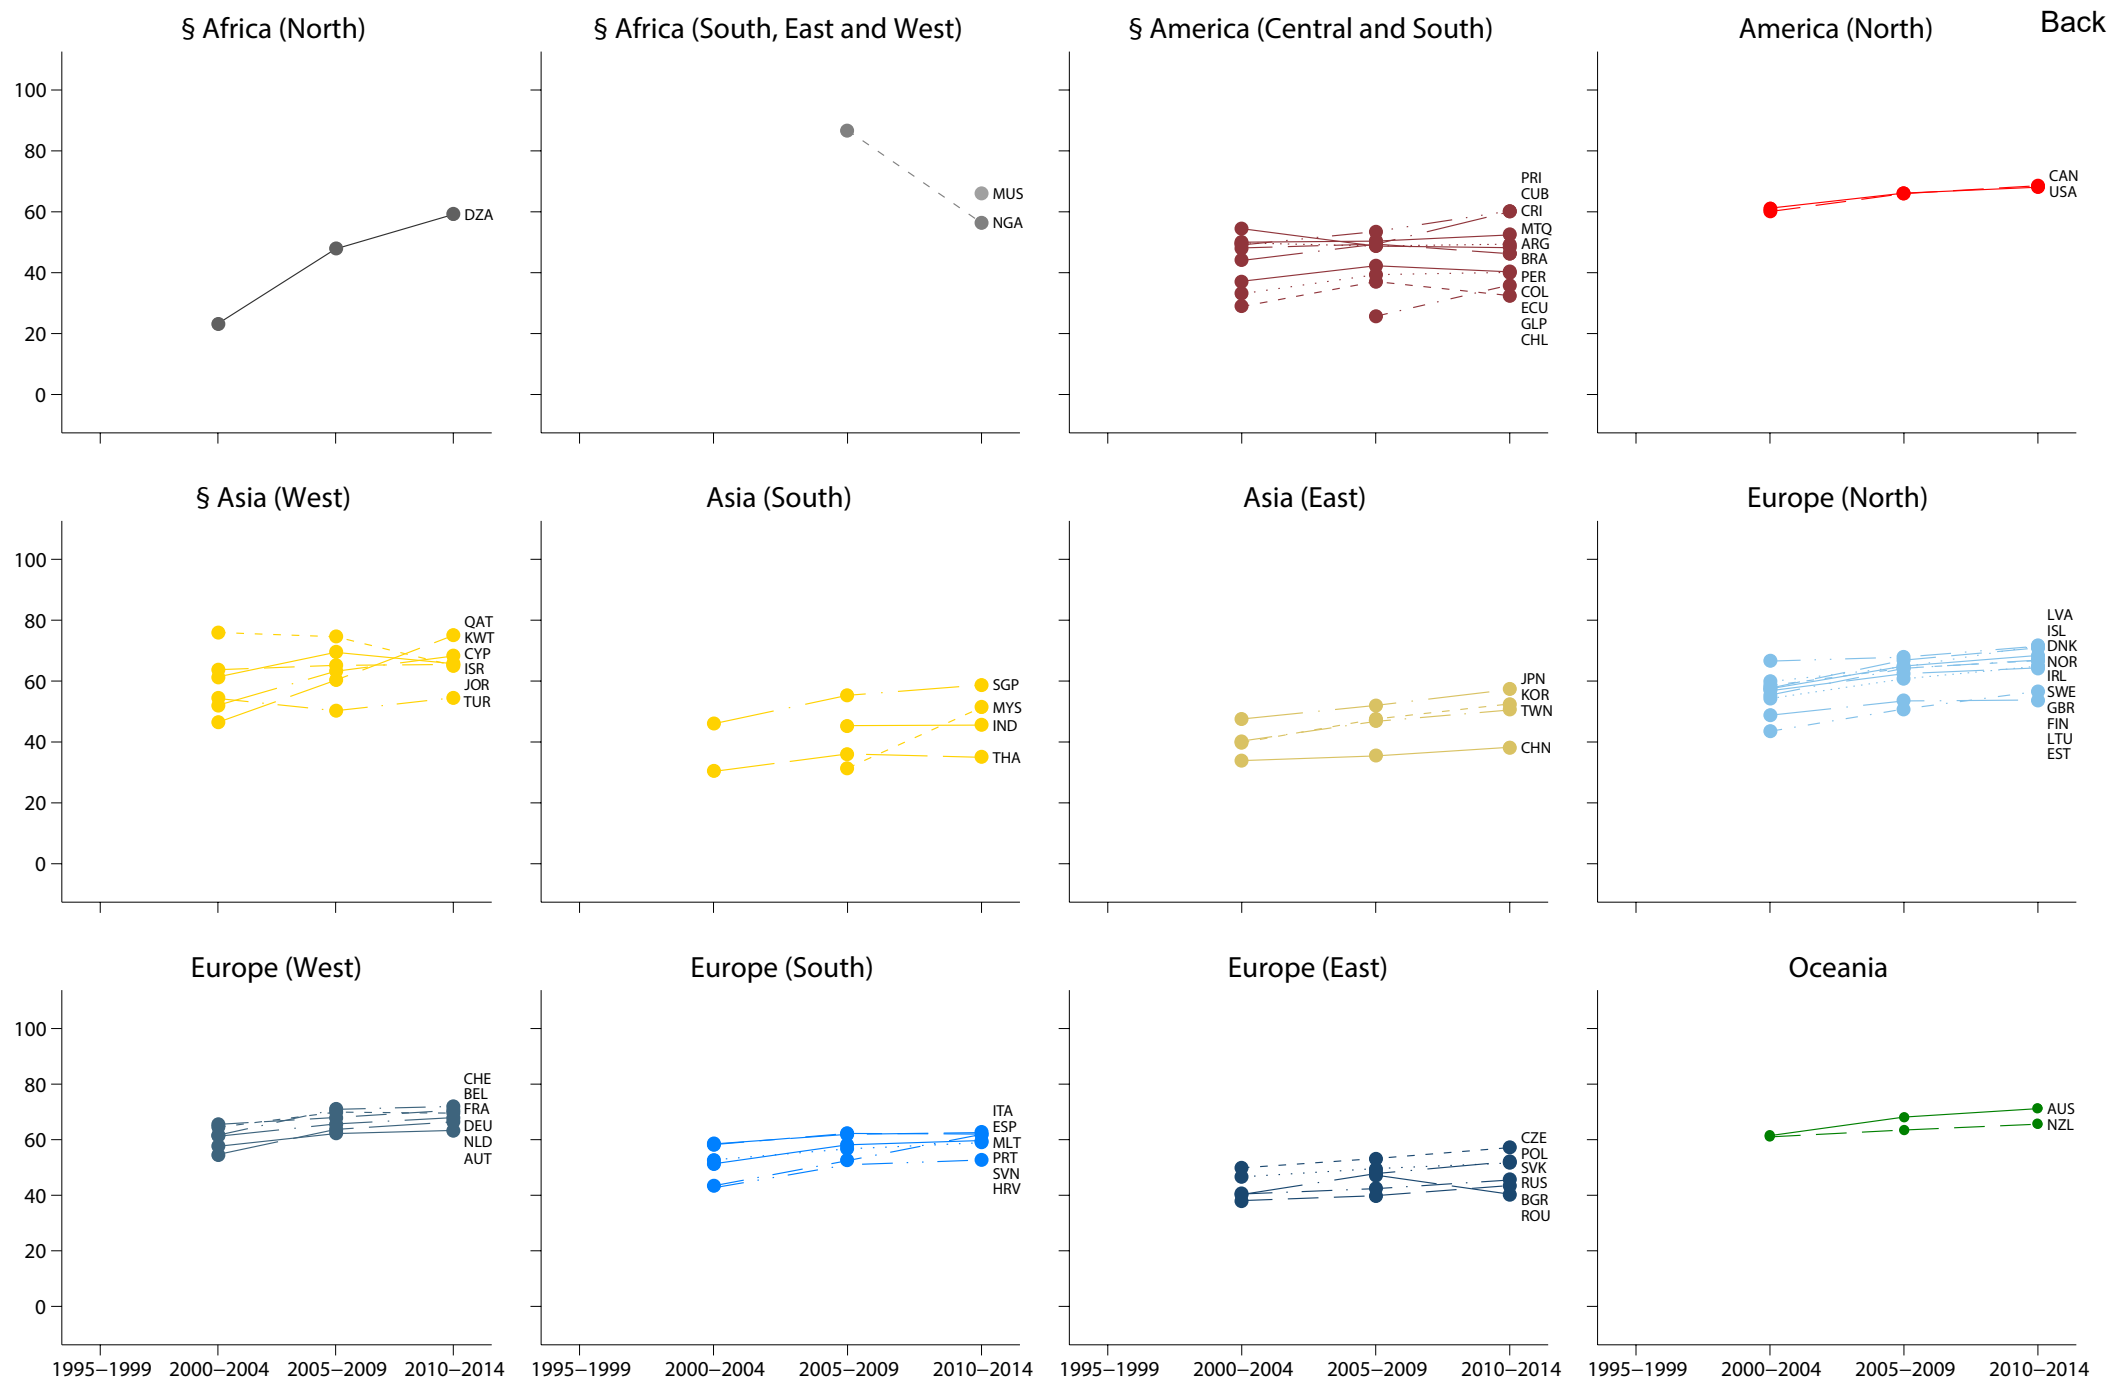

**Web-figure 3.16: Brain (children)** - Trends in age-standardised five-year net survival (%) for children (0-14) years diagnosed during 2000-2004, 2005-2009 and 2010-2014, by continent (or continental region) and country.

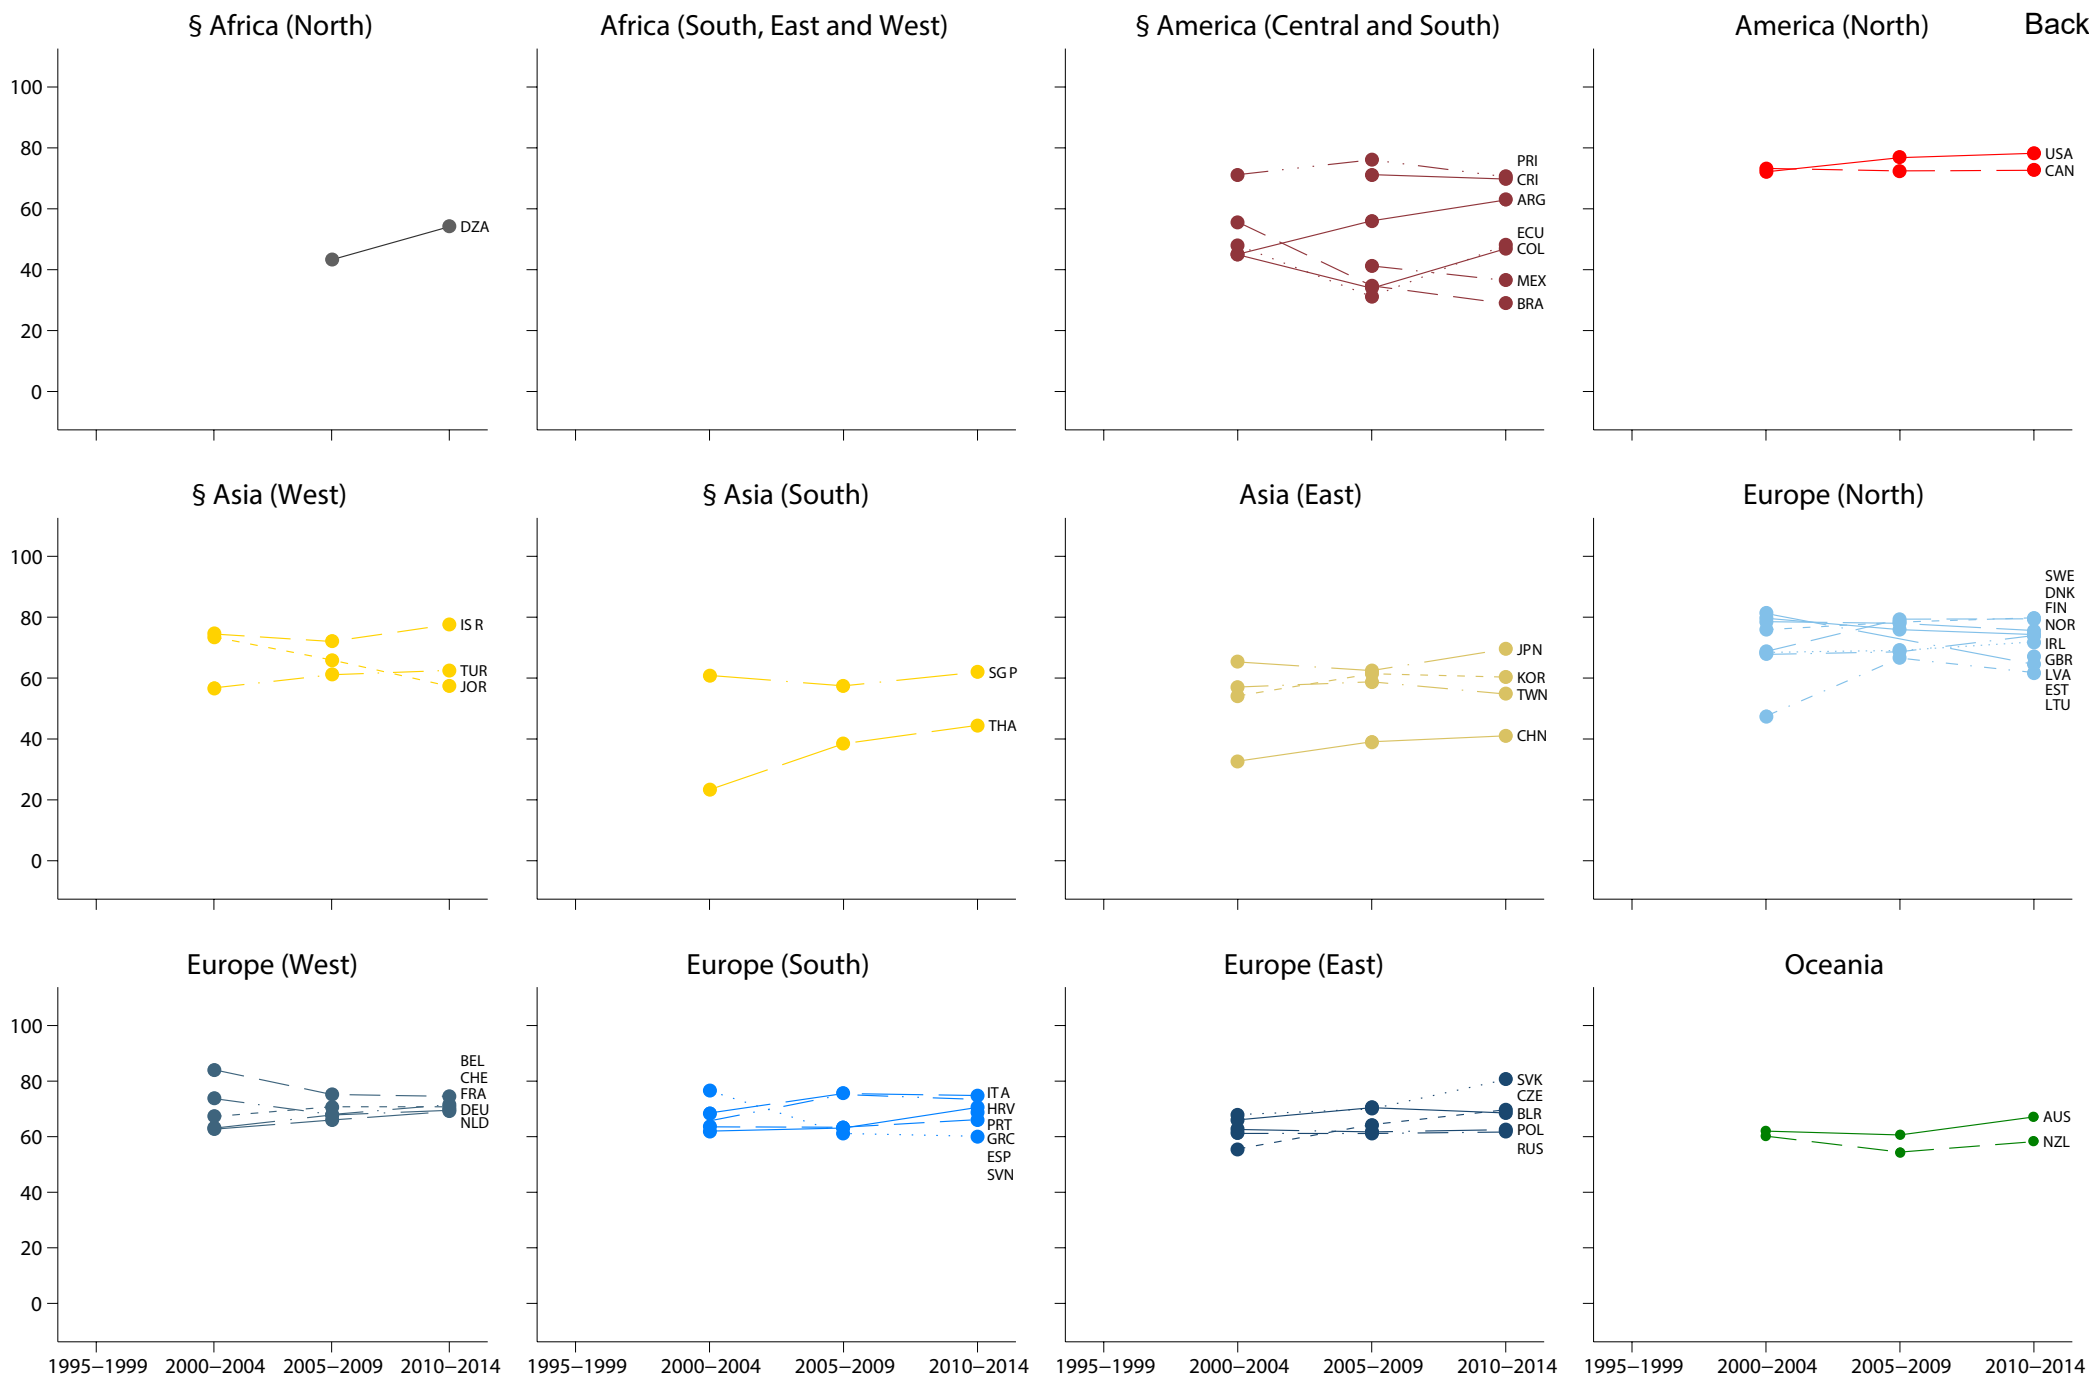

§ Continent or continental region with one or more national estimates flagged as less reliable.

**Web-figure 3.17: Acute lymphoblastic leukaemia (children)** - Trends in age-standardised five-year net survival (%) for children (0-14 years) diagnosed during 1995-1999,2000-2004, 2005-2009 and 2010-2014, by continent (or continental region) and country.

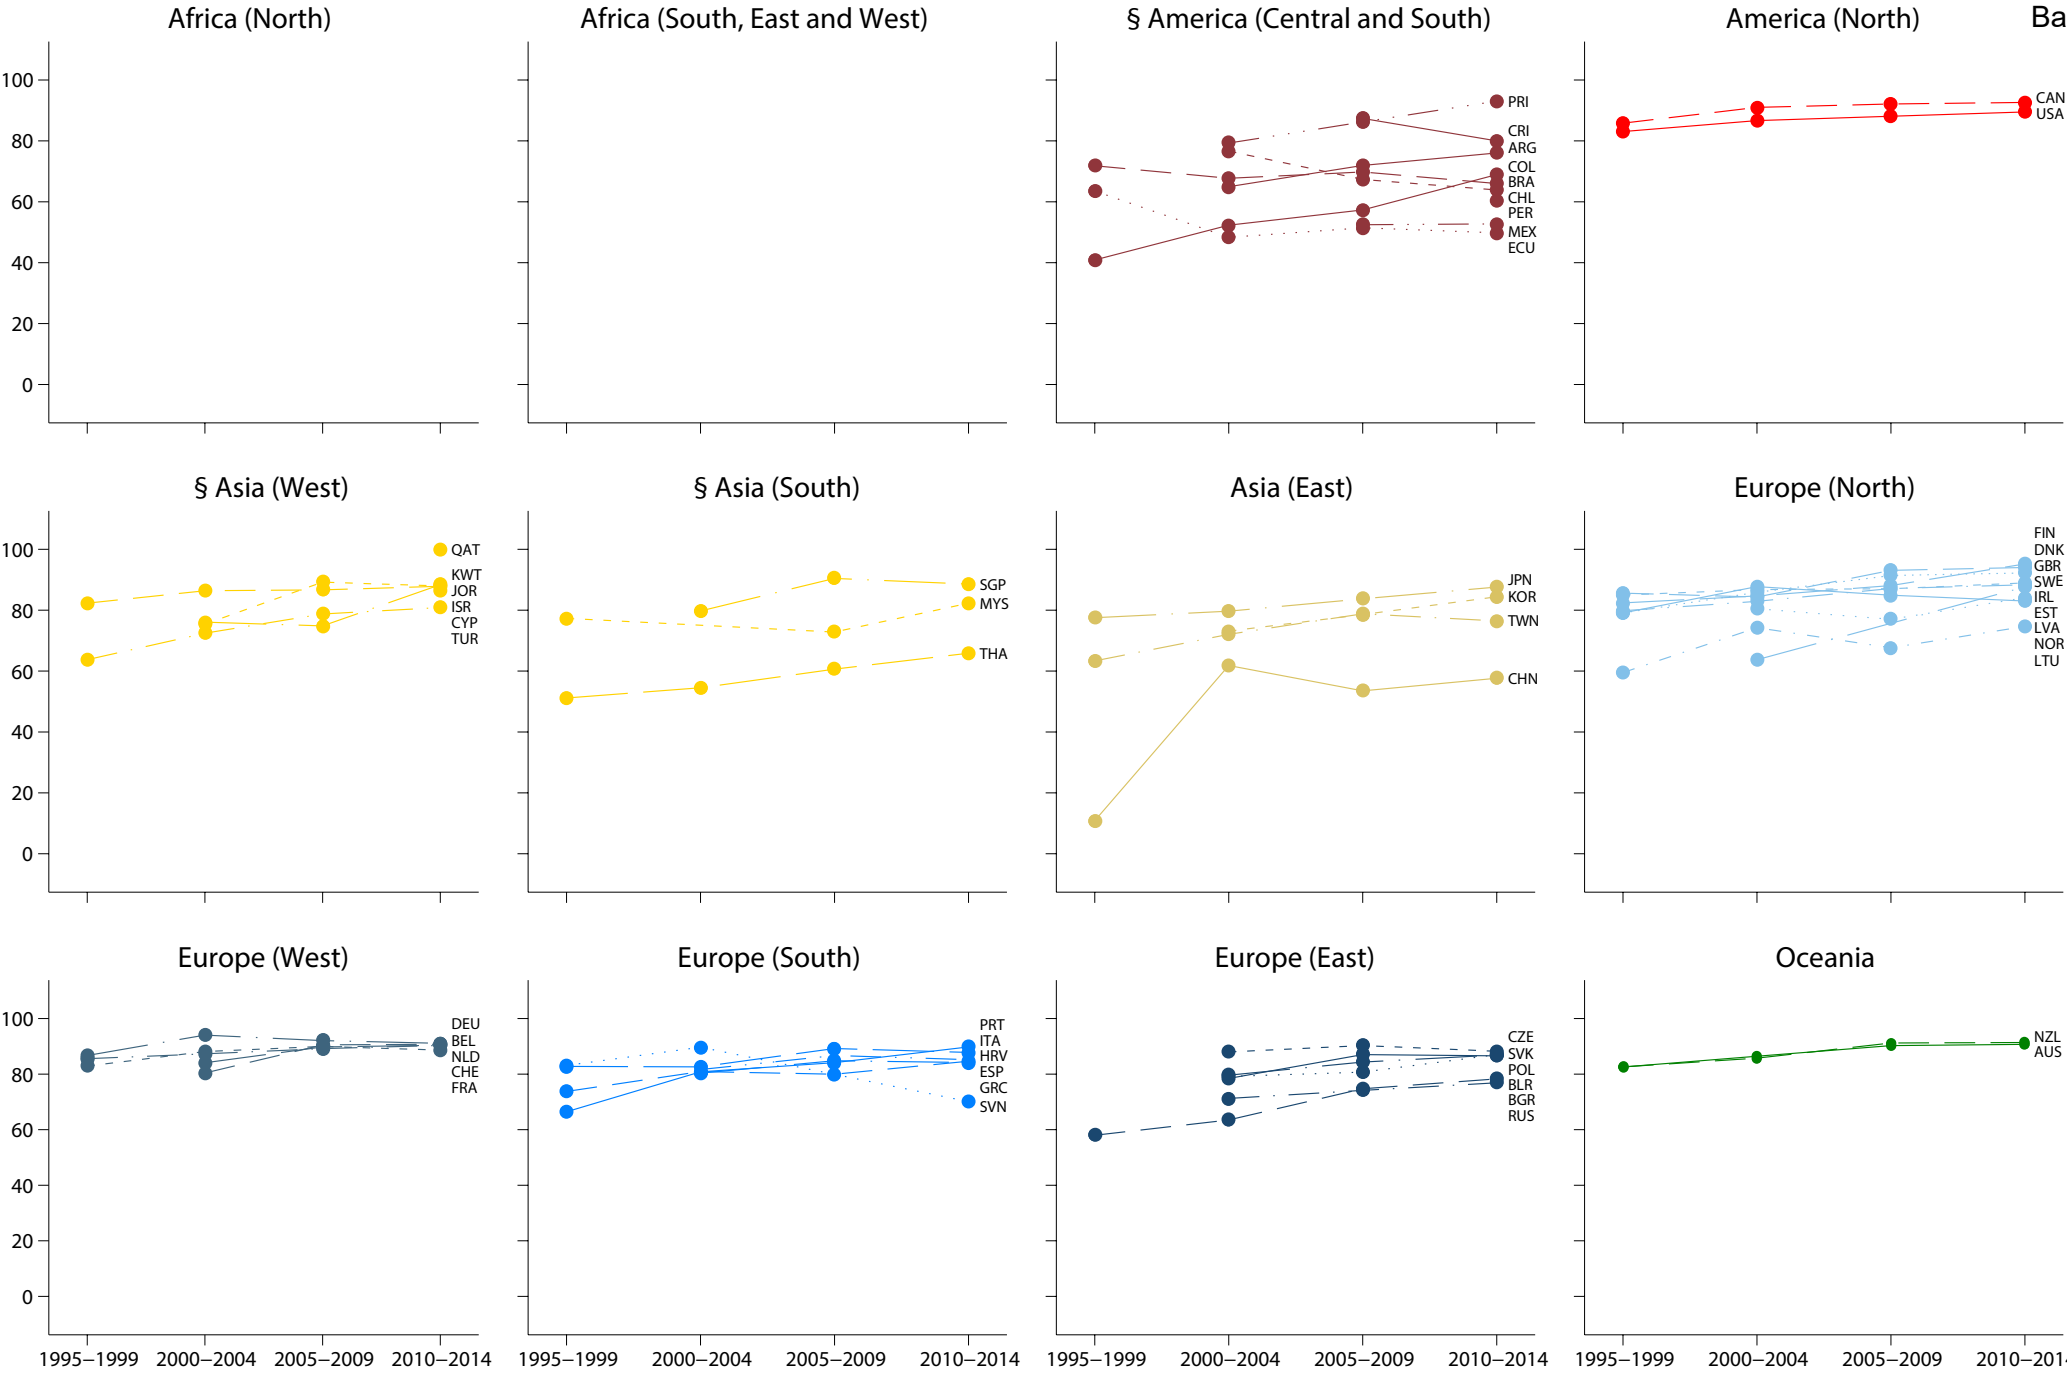

**Web-figure 3.18: Lymphomas (children)** - Trends in age-standardised five-year net survival (%) for children (0-14 years) diagnosed during 2000-2004, 2005-2009 and 2010-2014, by continent (or continental region) and country.

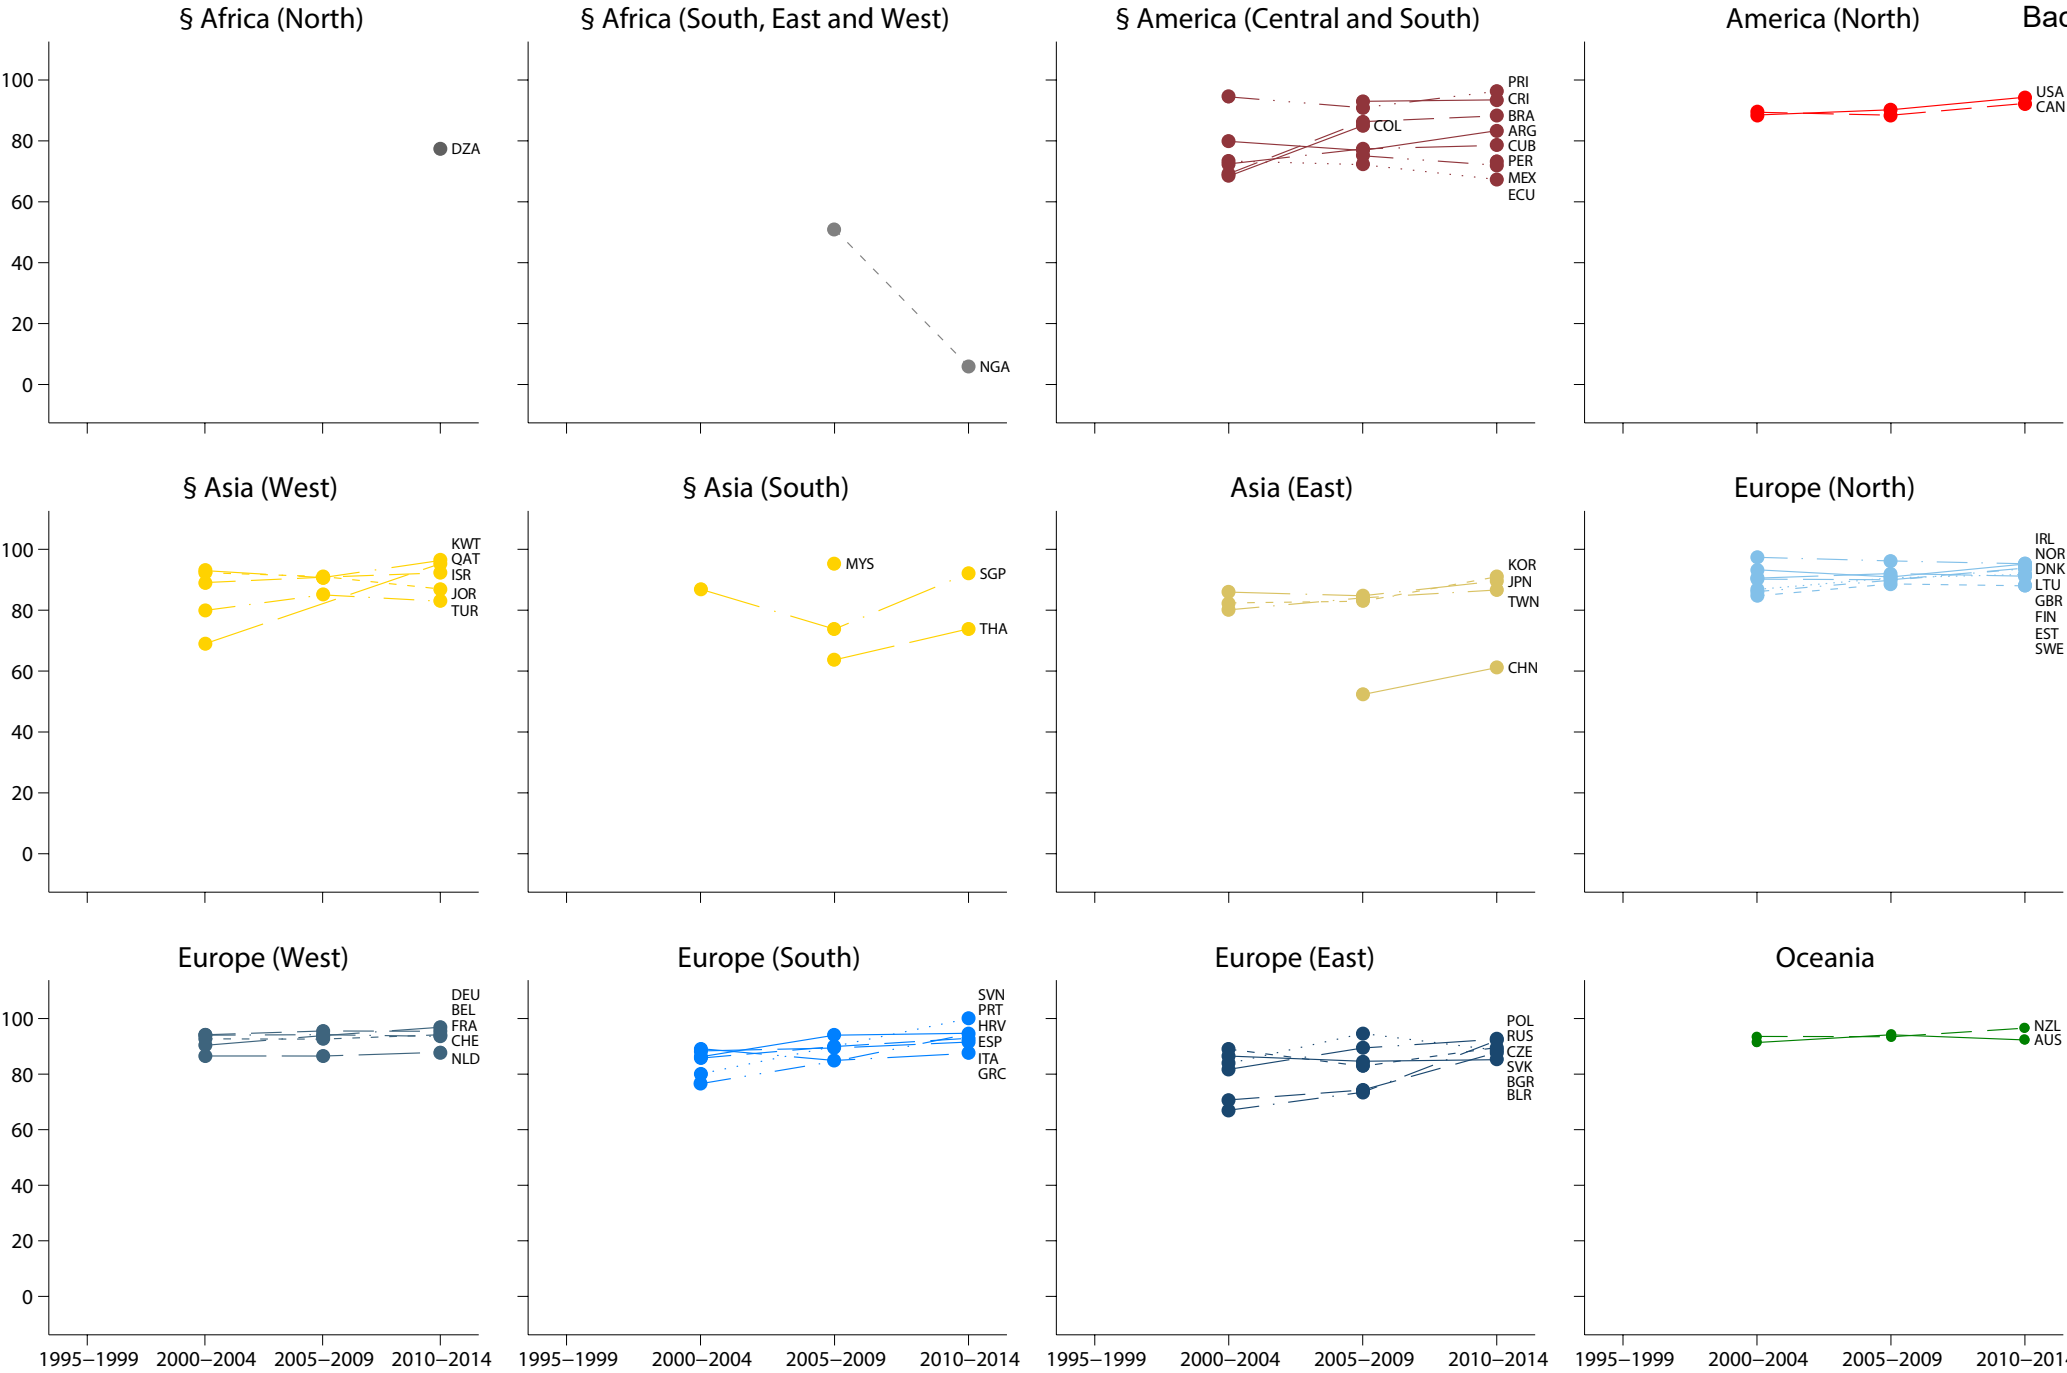

§ Continent or continental region with one or more national estimates flagged as less reliable.

**Web-figure 4: Range of age-standardised five-year net survival (%), adults (15-99 years) diagnosed with one of 15 common malignancies, and children (0-14 years) diagnosed with one of 3 common malignancies, by continent and period of diagnosis (2000-2004, 2005-2009 and 2010-2014)**

**Adults**

|                 |                                                   |
|-----------------|---------------------------------------------------|
| Web-figure 4.1  | Oesophagus                                        |
| Web-figure 4.2  | Stomach                                           |
| Web-figure 4.3  | Colon [also in Figure 4 in main article]          |
| Web-figure 4.4  | Rectum                                            |
| Web-figure 4.5  | Liver                                             |
| Web-figure 4.6  | Pancreas                                          |
| Web-figure 4.7  | Lung                                              |
| Web-figure 4.8  | Melanoma of the skin                              |
| Web-figure 4.9  | Breast (women) [also in Figure 4 in main article] |
| Web-figure 4.10 | Cervix                                            |
| Web-figure 4.11 | Ovary                                             |
| Web-figure 4.12 | Prostate                                          |
| Web-figure 4.13 | Brain tumours                                     |
| Web-figure 4.14 | Myeloid malignancies                              |
| Web-figure 4.15 | Lymphoid malignancies                             |

**Children**

|                 |                                                                  |
|-----------------|------------------------------------------------------------------|
| Web-figure 4.16 | Brain tumours                                                    |
| Web-figure 4.17 | Acute lymphoblastic leukaemia [also in Figure 4 in main article] |
| Web-figure 4.18 | Lymphomas                                                        |

Each box-plot shows the range of survival estimates among all cancer registries for which suitable estimates could be obtained for patients diagnosed in each calendar period, in each continent. The number of registries included in each box-plot is shown in parentheses. Survival estimates considered less reliable are not included (see text). The vertical line inside each box represents the median survival estimate among all contributing registries (the central value in the range, or 50th centile). The box covers the inter-quartile range (IQR) between the lower and upper quartiles (25th and 75th centiles). Where there are only a few widely scattered estimates, the median may be close to the lower or upper quartile. The extreme limits of the box-plot are 1.5\*IQR below the lower quartile and 1.5\*IQR above the upper quartile. Open circles indicate 'outlier' values, outside this range.

**Web-figure 4.1: Oesophageal cancer** – Global range of age-standardised five-year net survival (%) estimates among 234 cancer registry populations in 50 countries, by continent and calendar period of diagnosis (2000-2004, 2005-2009, 2010-2014): adults (15-99 years)

[Back](#)

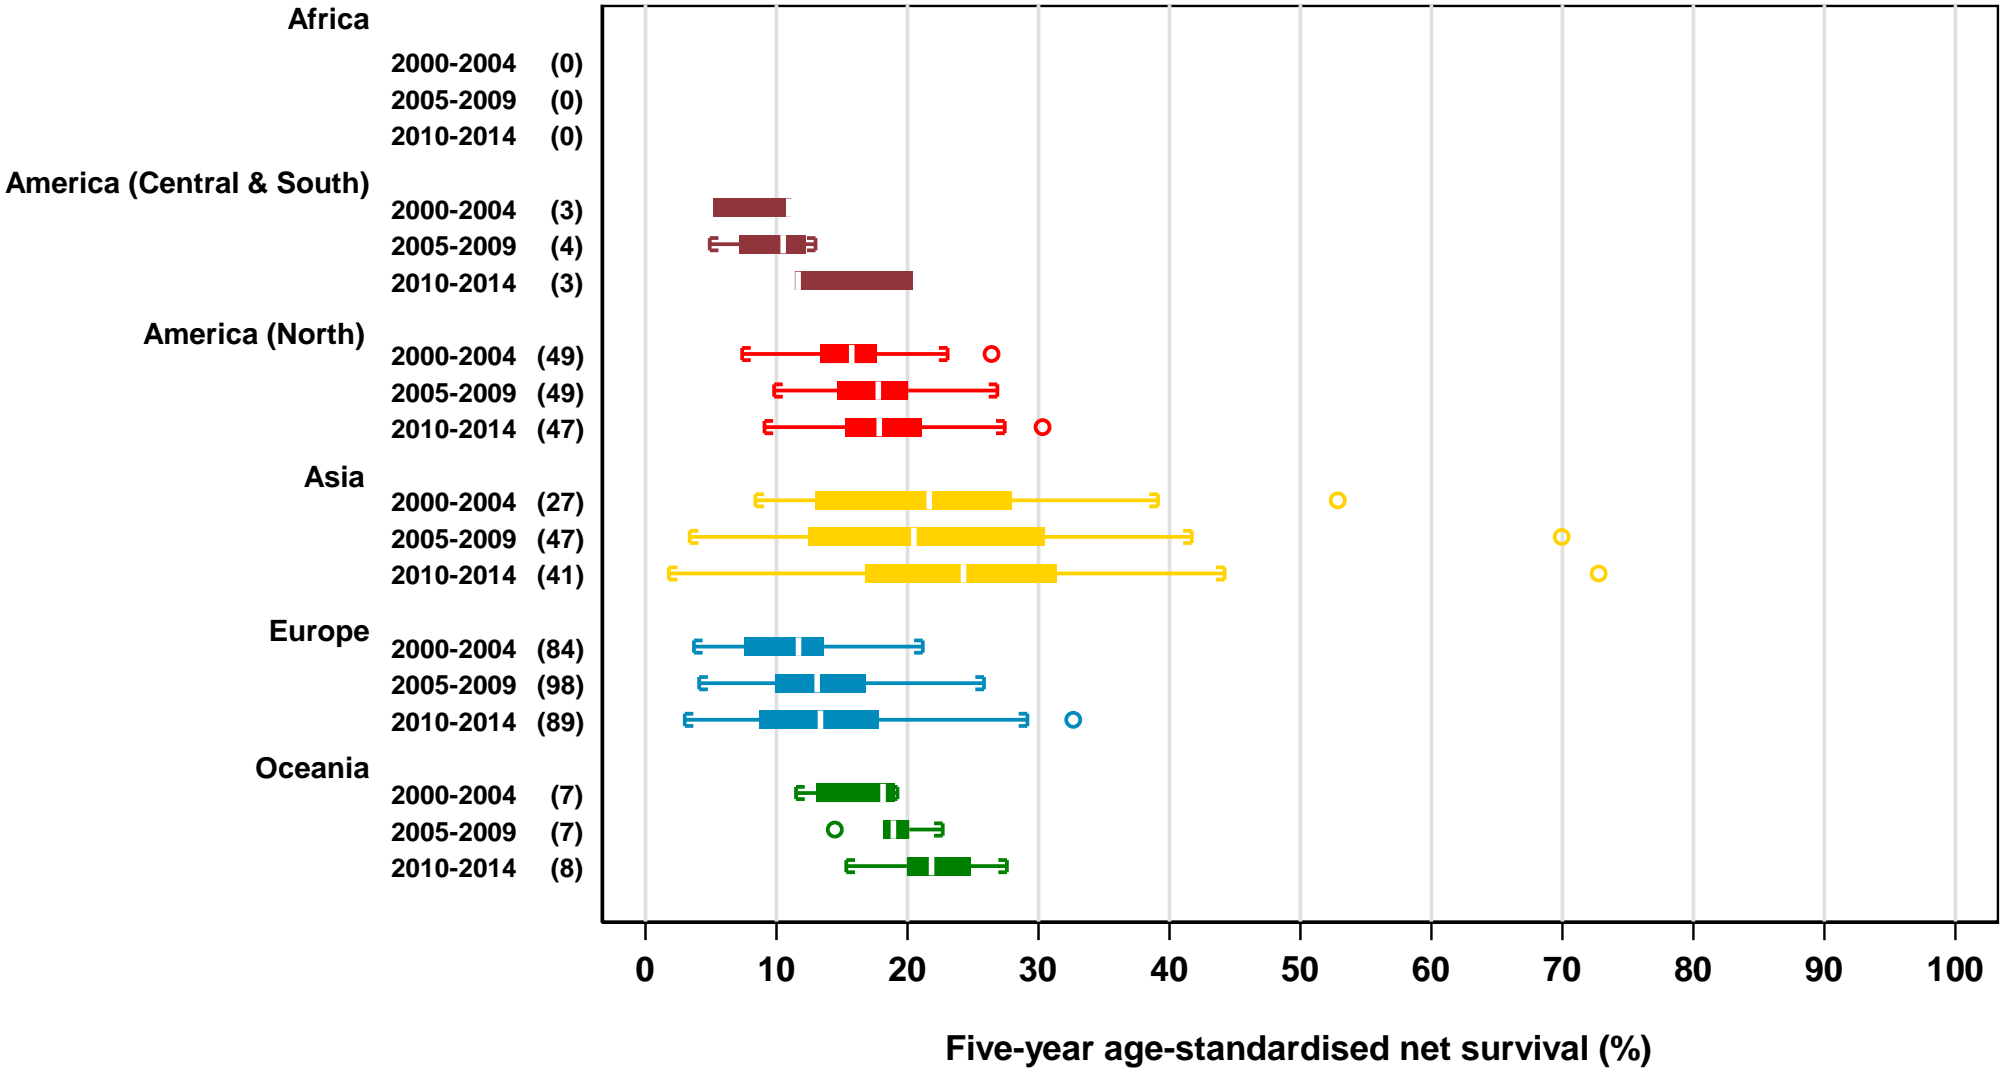

**Web-figure 4.2: Stomach cancer** – Global range of age-standardised five-year net survival (%) estimates among 281 cancer registry populations in 60 countries, by continent and calendar period of diagnosis (2000-2004, 2005-2009, 2010-2014): adults (15-99 years)

[Back](#)

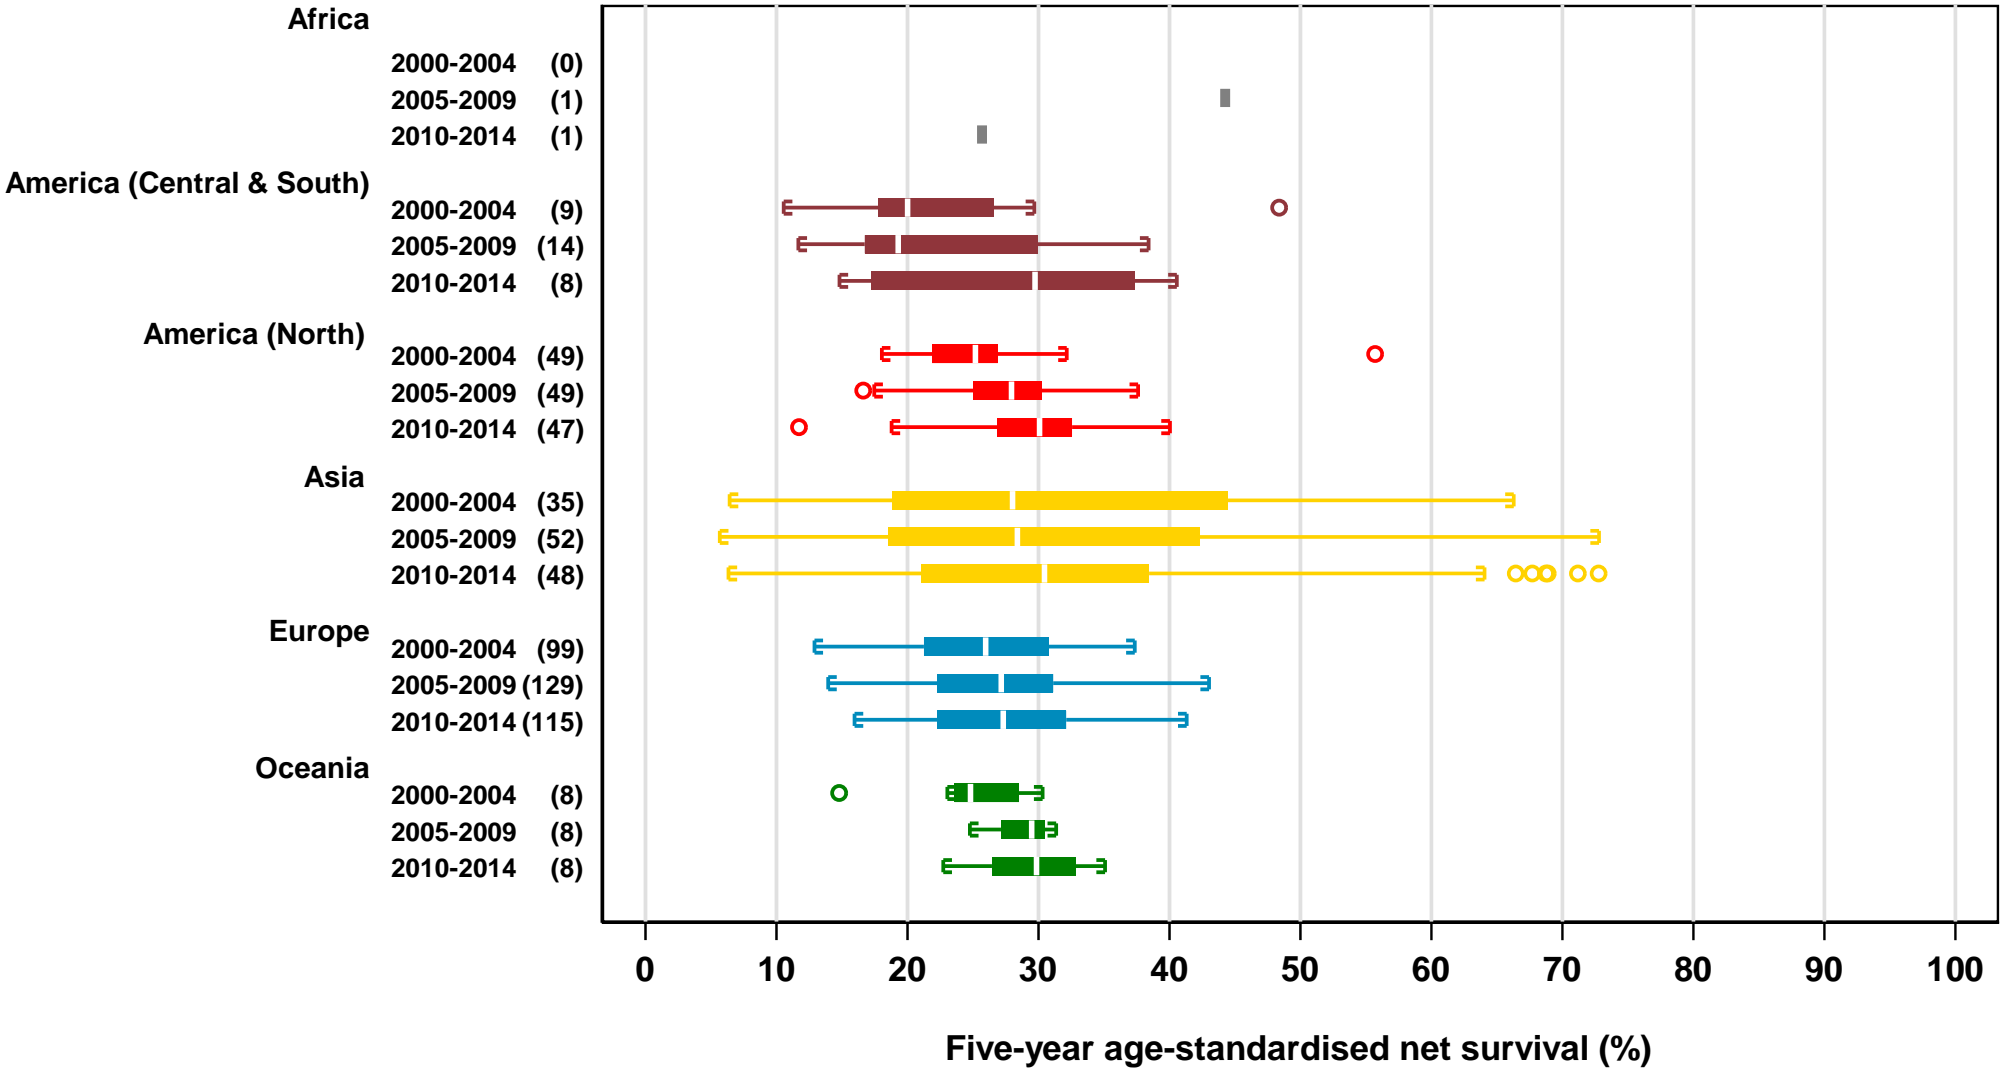

**Web-figure 4.3: Colon cancer** – Global range of age-standardised five-year net survival (%) estimates among 288 cancer registry populations in 63 countries, by continent and calendar period of diagnosis (2000-2004, 2005-2009, 2010-2014): adults (15-99 years)

[Back](#)

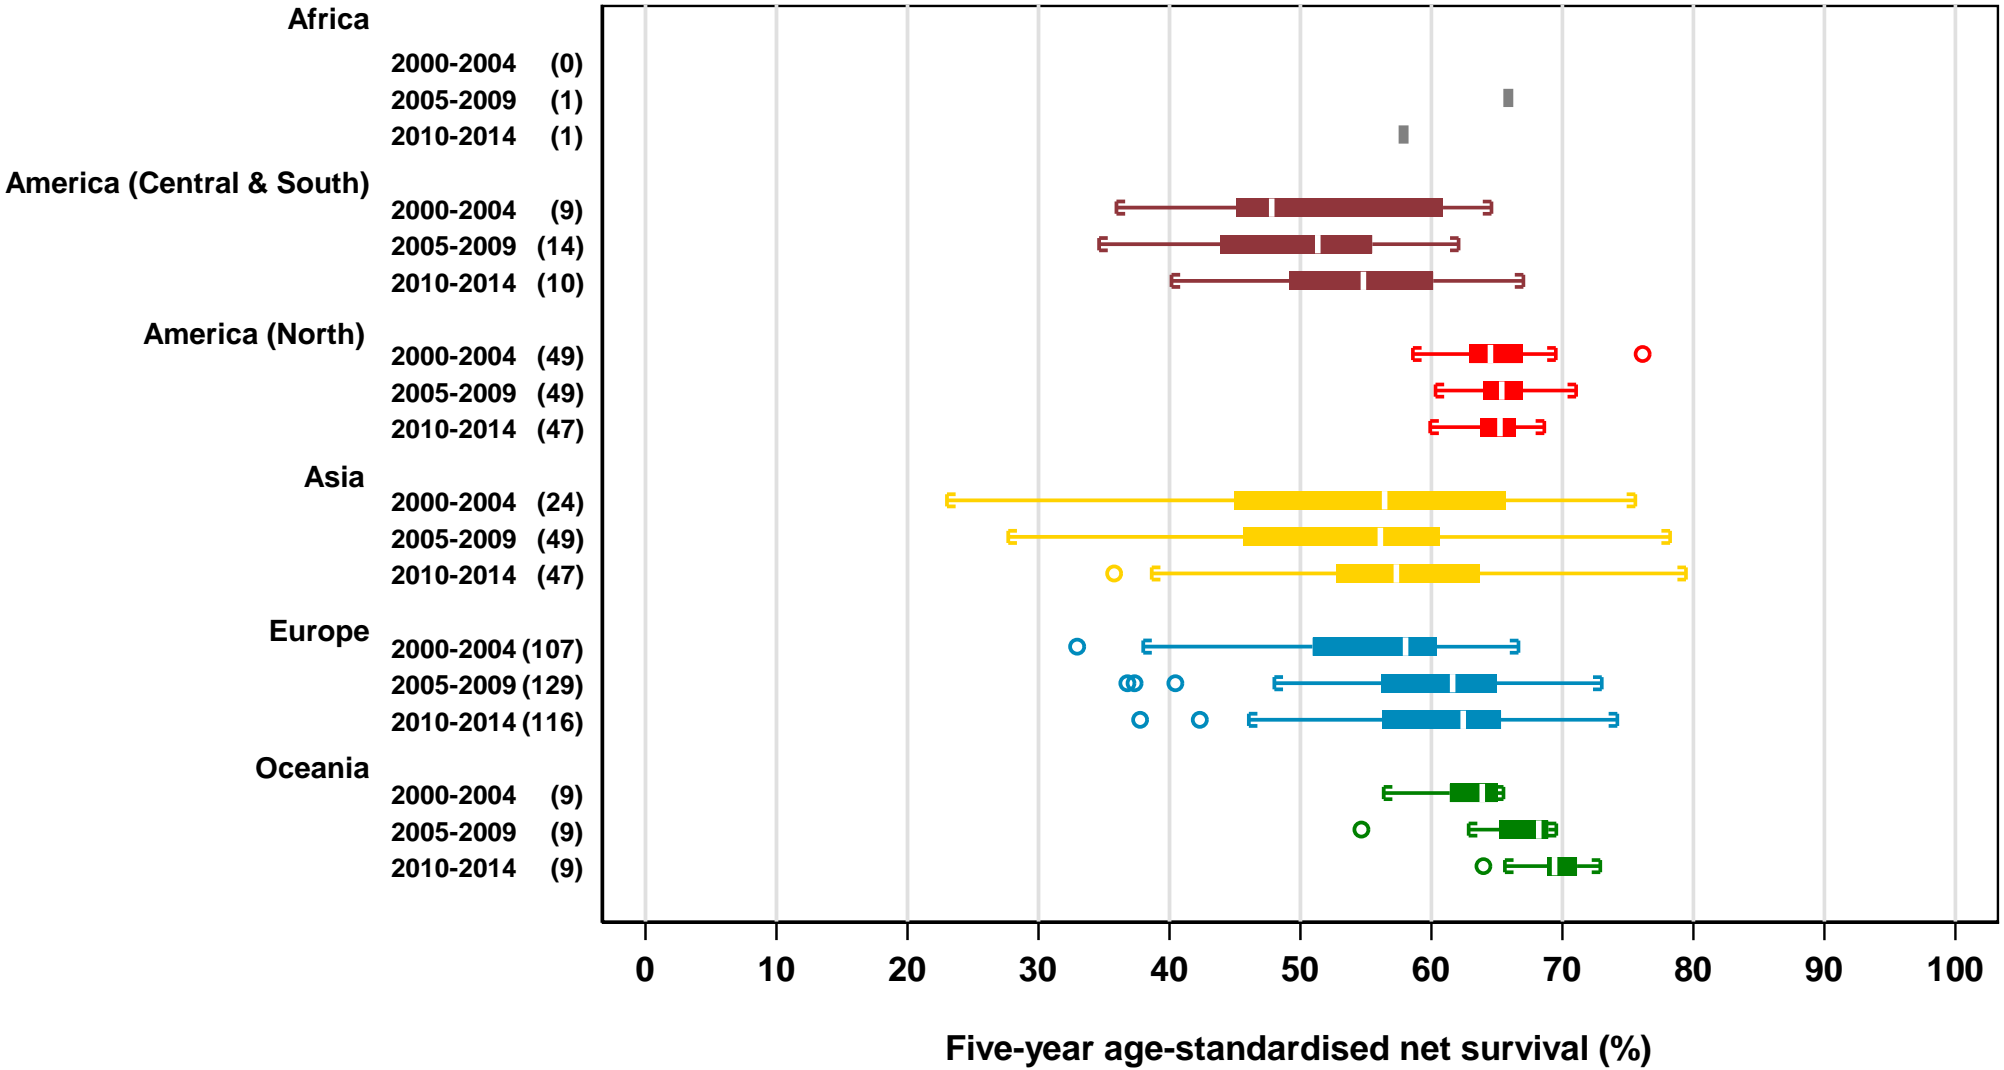

**Web-figure 4.4: Rectal cancer** – Global range of age-standardised five-year net survival (%) estimates among 279 cancer registry populations in 60 countries, by continent and calendar period of diagnosis (2000-2004, 2005-2009, 2010-2014): adults (15-99 years)

[Back](#)

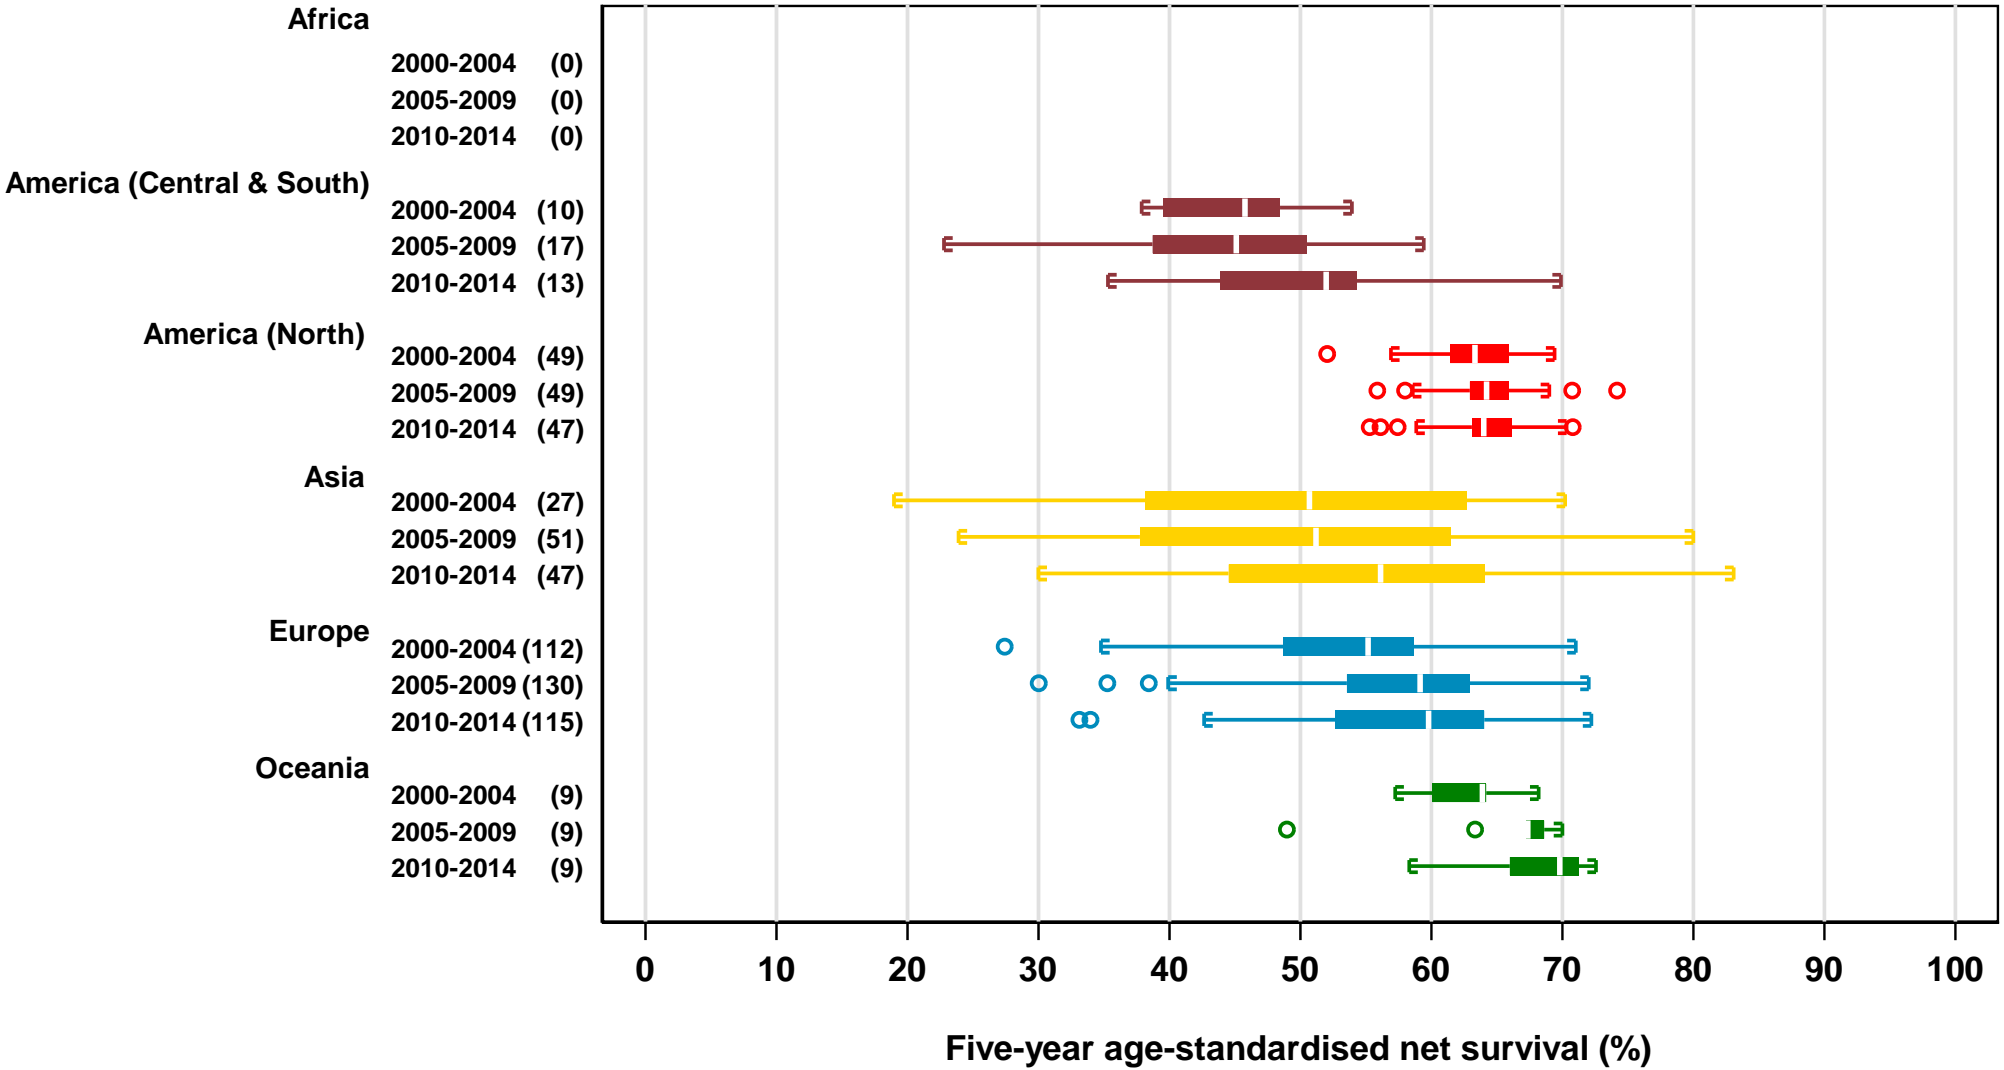

**Web-figure 4.5: Liver cancer** – Global range of age-standardised five-year net survival (%) estimates among 262 cancer registry populations in 55 countries, by continent and calendar period of diagnosis (2000-2004, 2005-2009, 2010-2014): adults (15-99 years)

[Back](#)

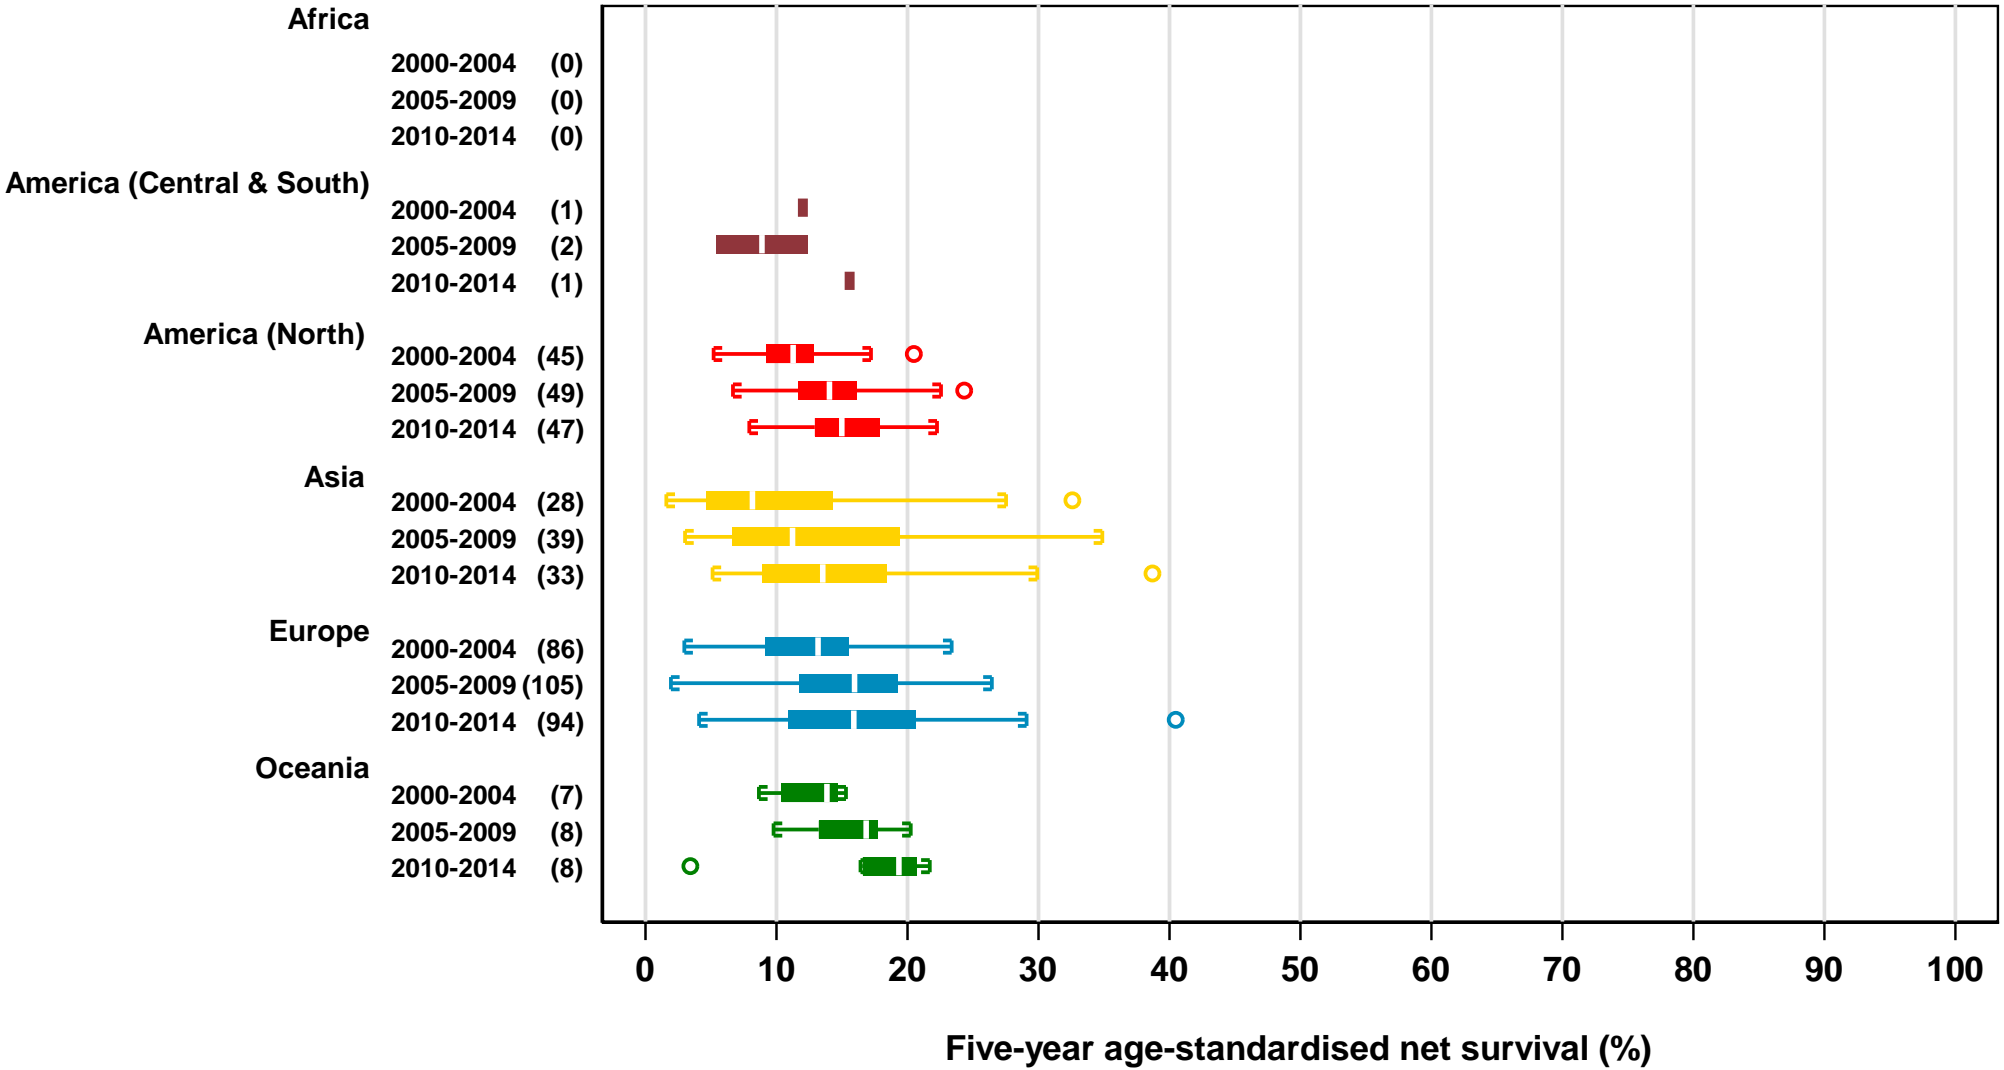

**Web-figure 4.6: Pancreatic cancer** – Global range of age-standardised five-year net survival (%) estimates among 261 cancer registry populations in 53 countries, by continent and calendar period of diagnosis (2000-2004, 2005-2009, 2010-2014): adults (15-99 years)

[Back](#)

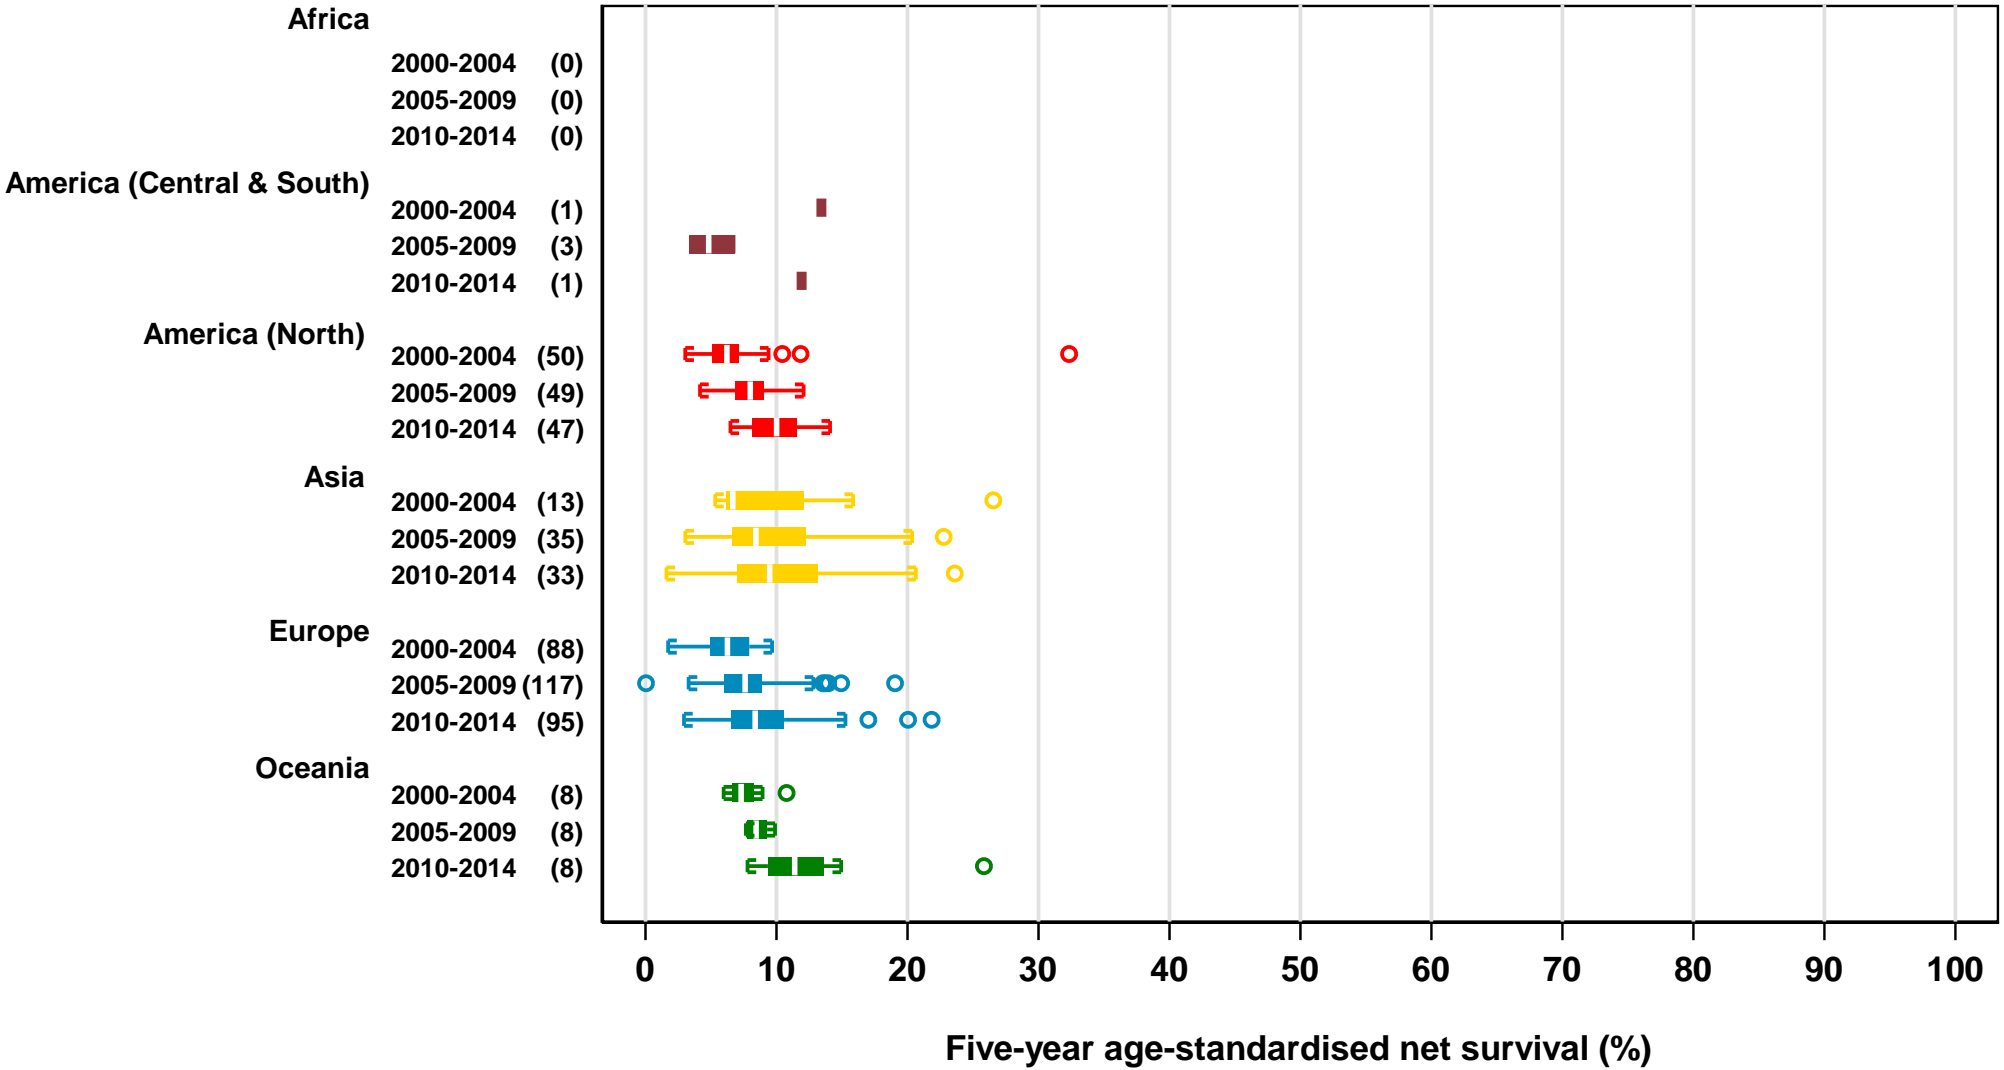

**Web-figure 4.7: Lung cancer** – Global range of age-standardised five-year net survival (%) estimates among 279 cancer registry populations in 60 countries, by continent and calendar period of diagnosis (2000-2004, 2005-2009, 2010-2014): adults (15-99 years)

[Back](#)

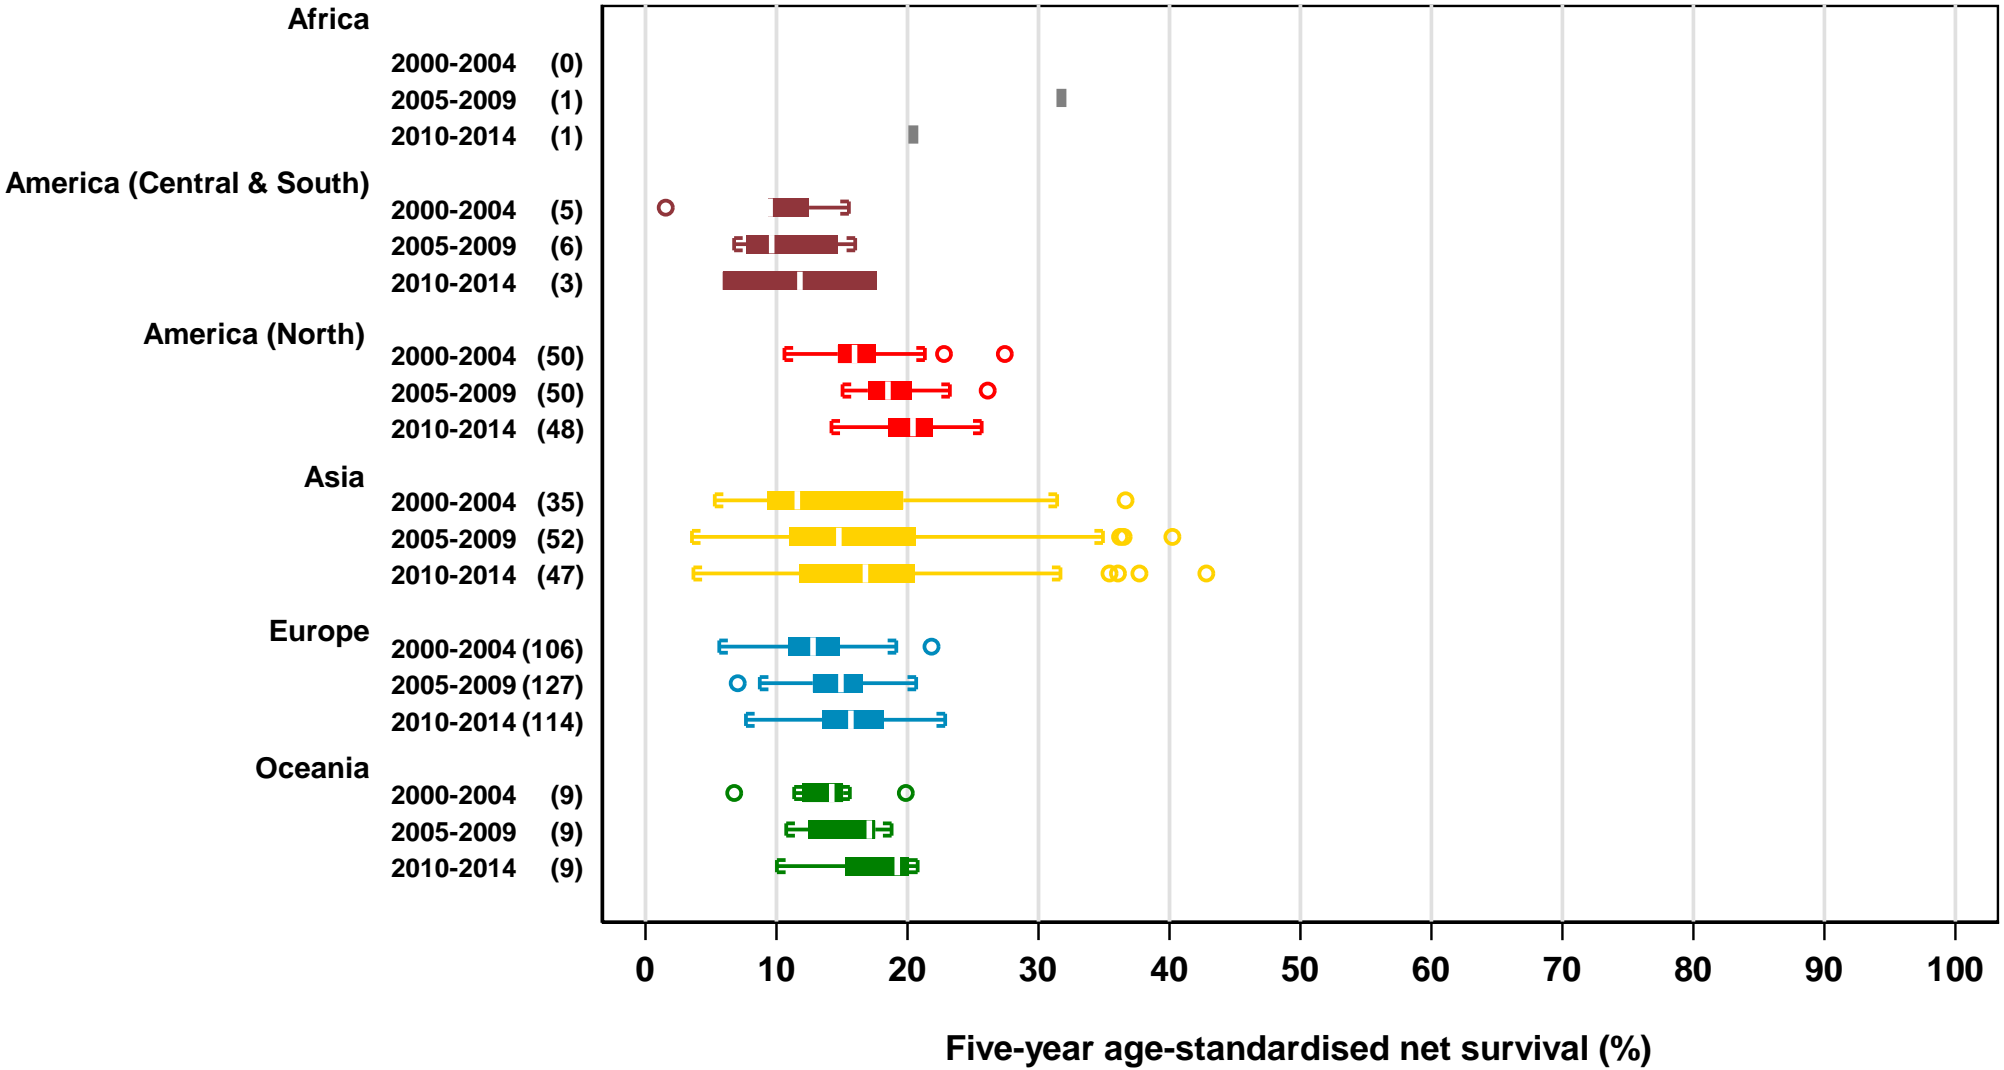

**Web-figure 4.8: Melanoma of the skin** – Global range of age-standardised five-year net survival (%) estimates among 228 cancer registry populations in 51 countries, by continent and calendar period of diagnosis (2000-2004, 2005-2009, 2010-2014): adults (15-99 years)

[Back](#)

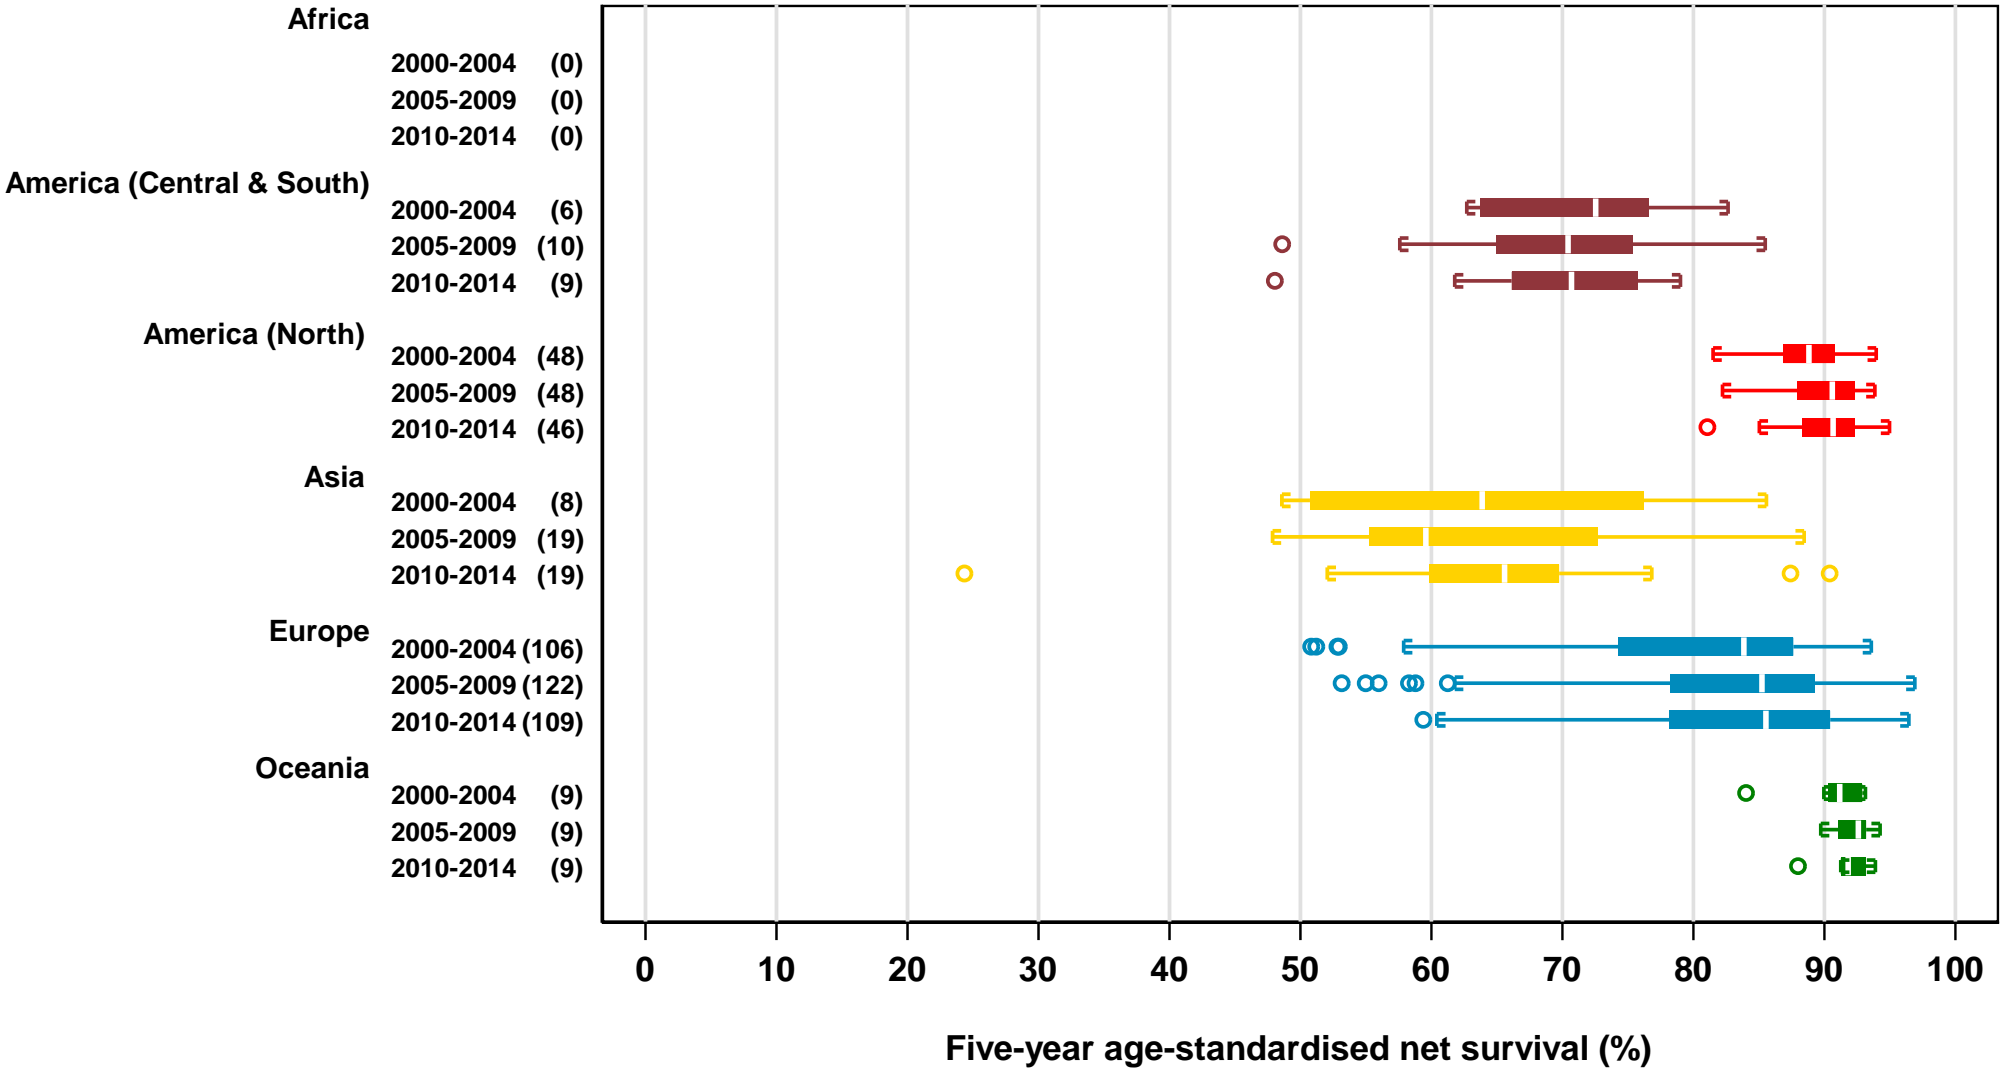

**Web-figure 4.9: Breast cancer** – Global range of age-standardised five-year net survival (%) estimates among 290 cancer registry populations in 65 countries, by continent and calendar period of diagnosis (2000-2004, 2005-2009, 2010-2014): women (15-99 years)

[Back](#)

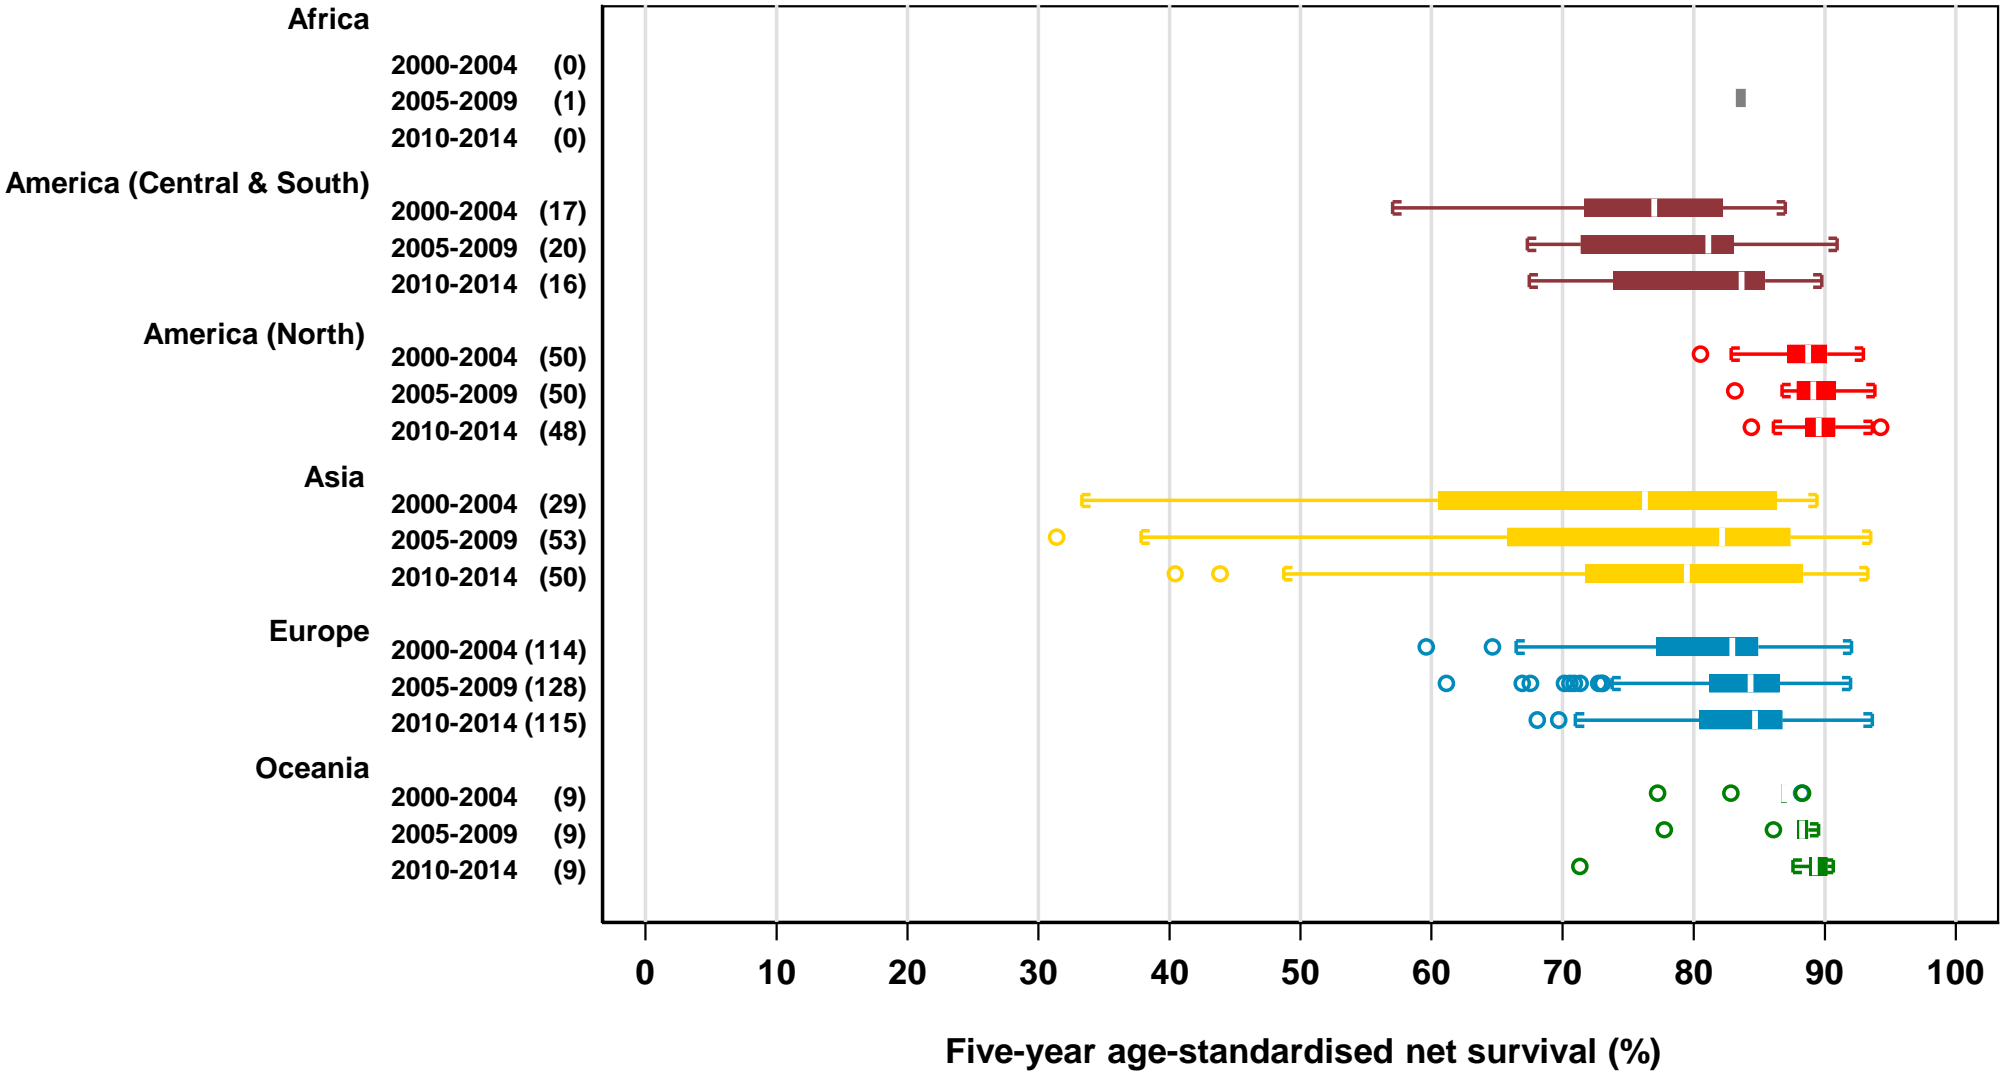

**Web-figure 4.10: Cervical cancer** – Global range of age-standardised five-year net survival (%) estimates among 269 cancer registry populations in 61 countries, by continent and calendar period of diagnosis (2000-2004, 2005-2009, 2010-2014): women (15-99 years)

[Back](#)

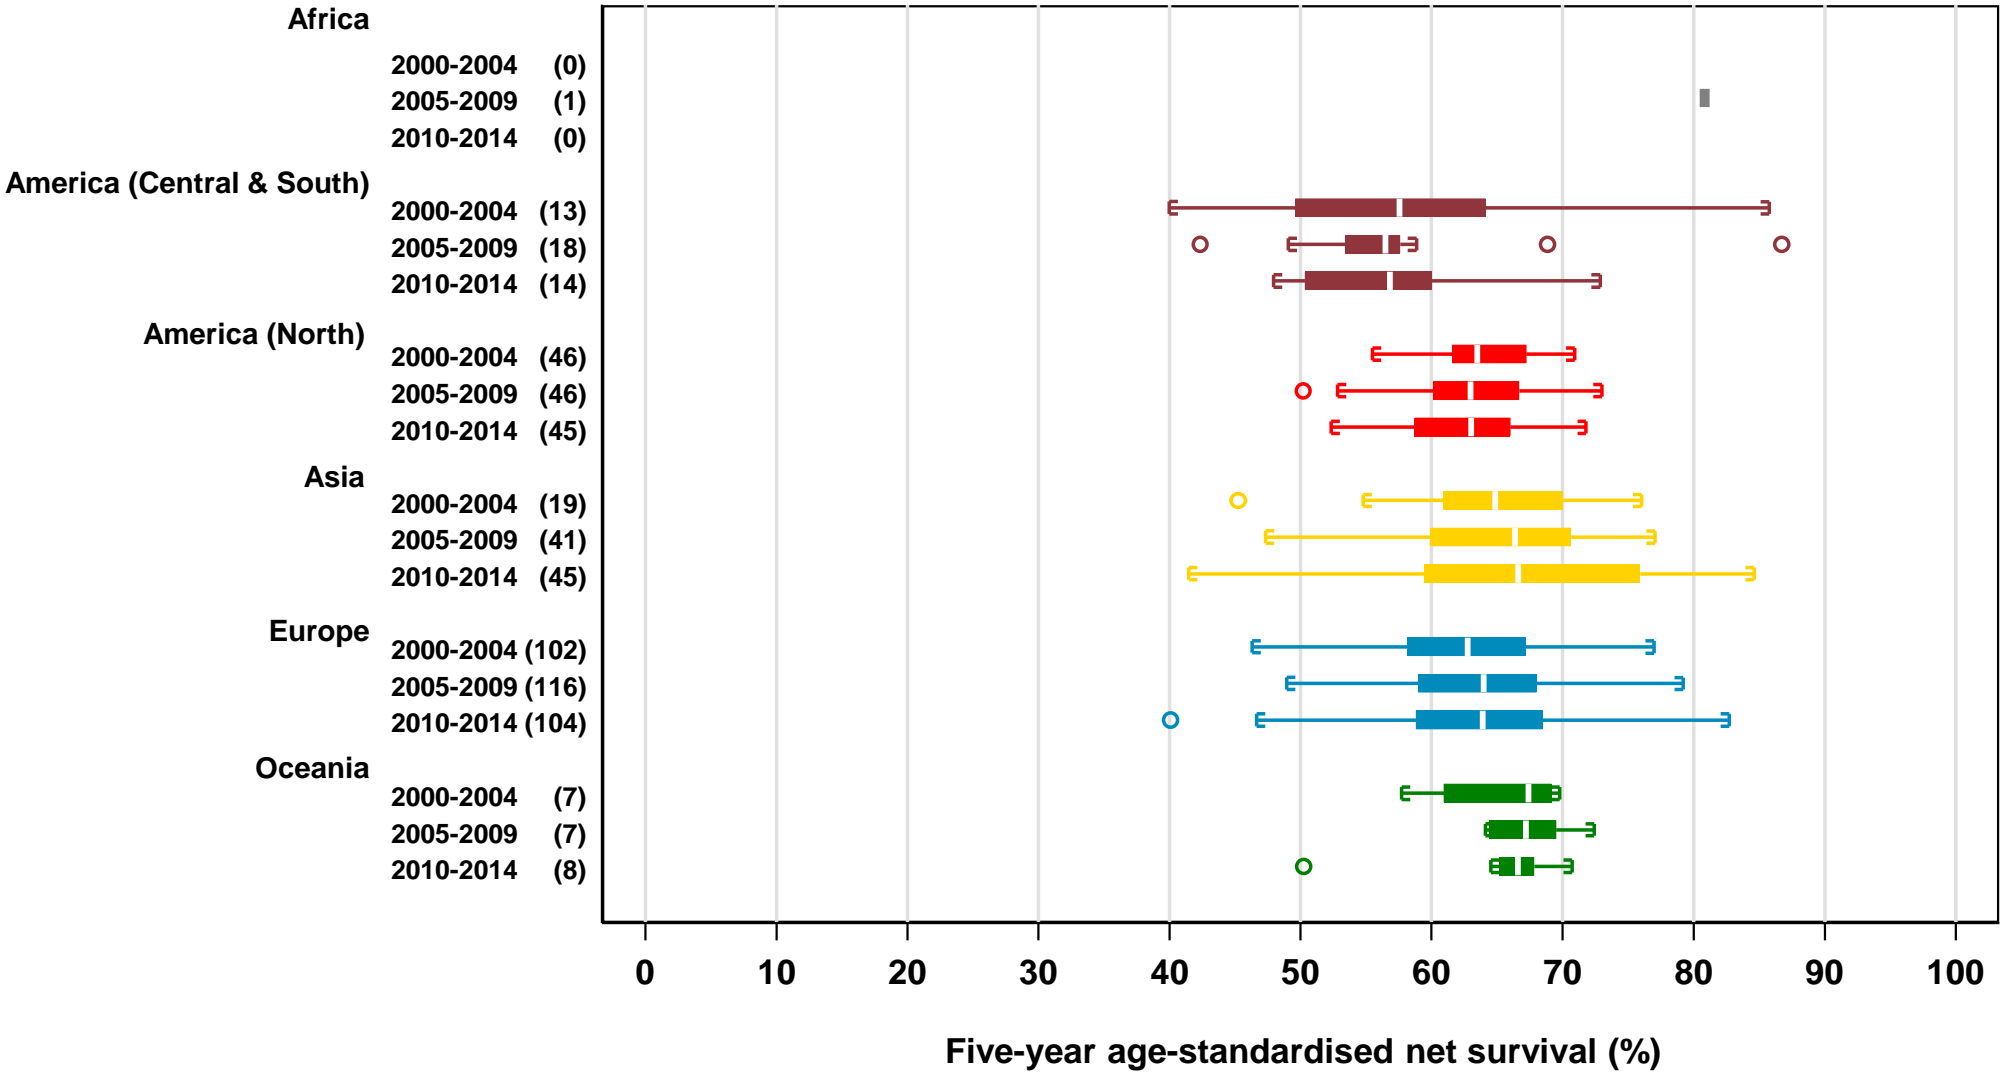

**Web-figure 4.11: Ovarian cancer** – Global range of age-standardised five-year net survival (%) estimates among 267 cancer registry populations in 58 countries, by continent and calendar period of diagnosis (2000-2004, 2005-2009, 2010-2014): women (15-99 years)

[Back](#)

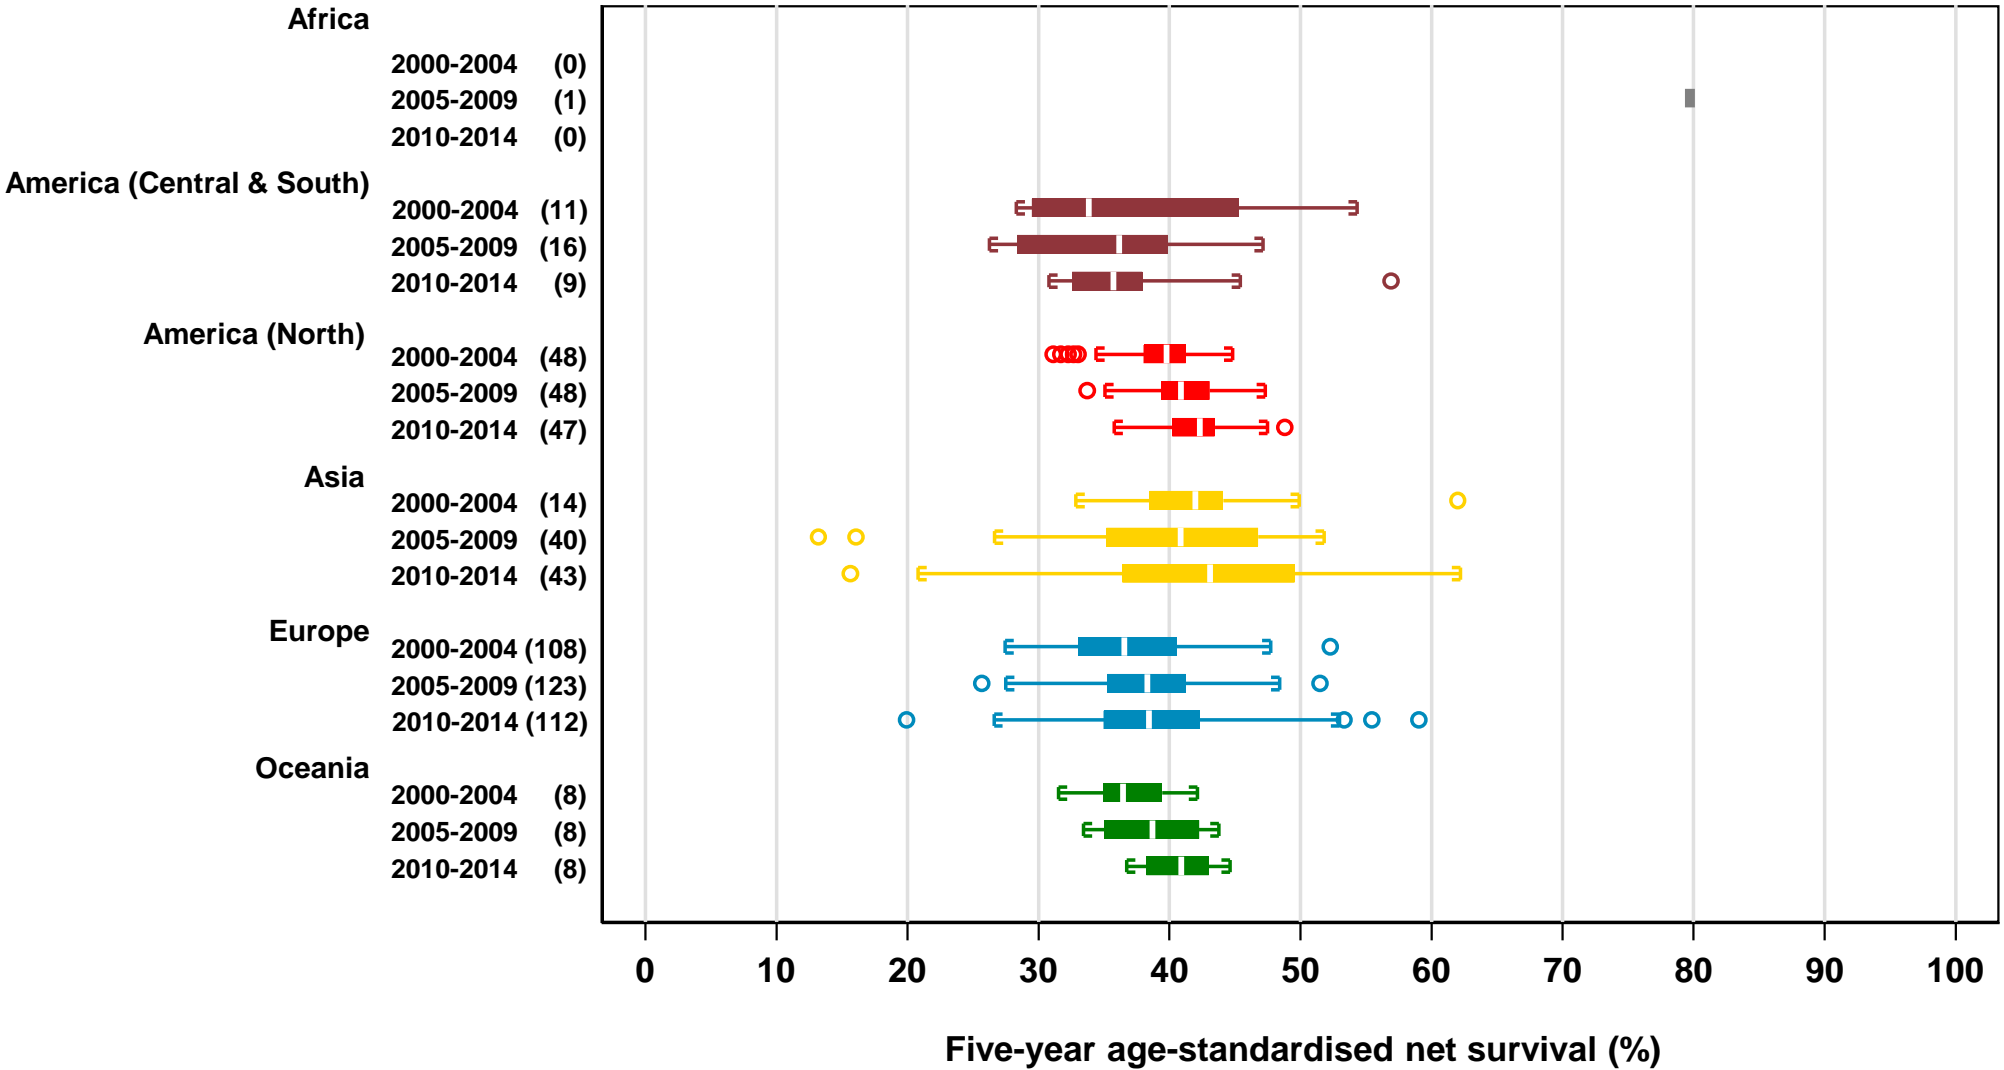

**Web-figure 4.12: Prostate cancer** – Global range of age-standardised five-year net survival (%) estimates among 266 cancer registry populations in 61 countries, by continent and calendar period of diagnosis (2000-2004, 2005-2009, 2010-2014): men (15-99 years)

[Back](#)

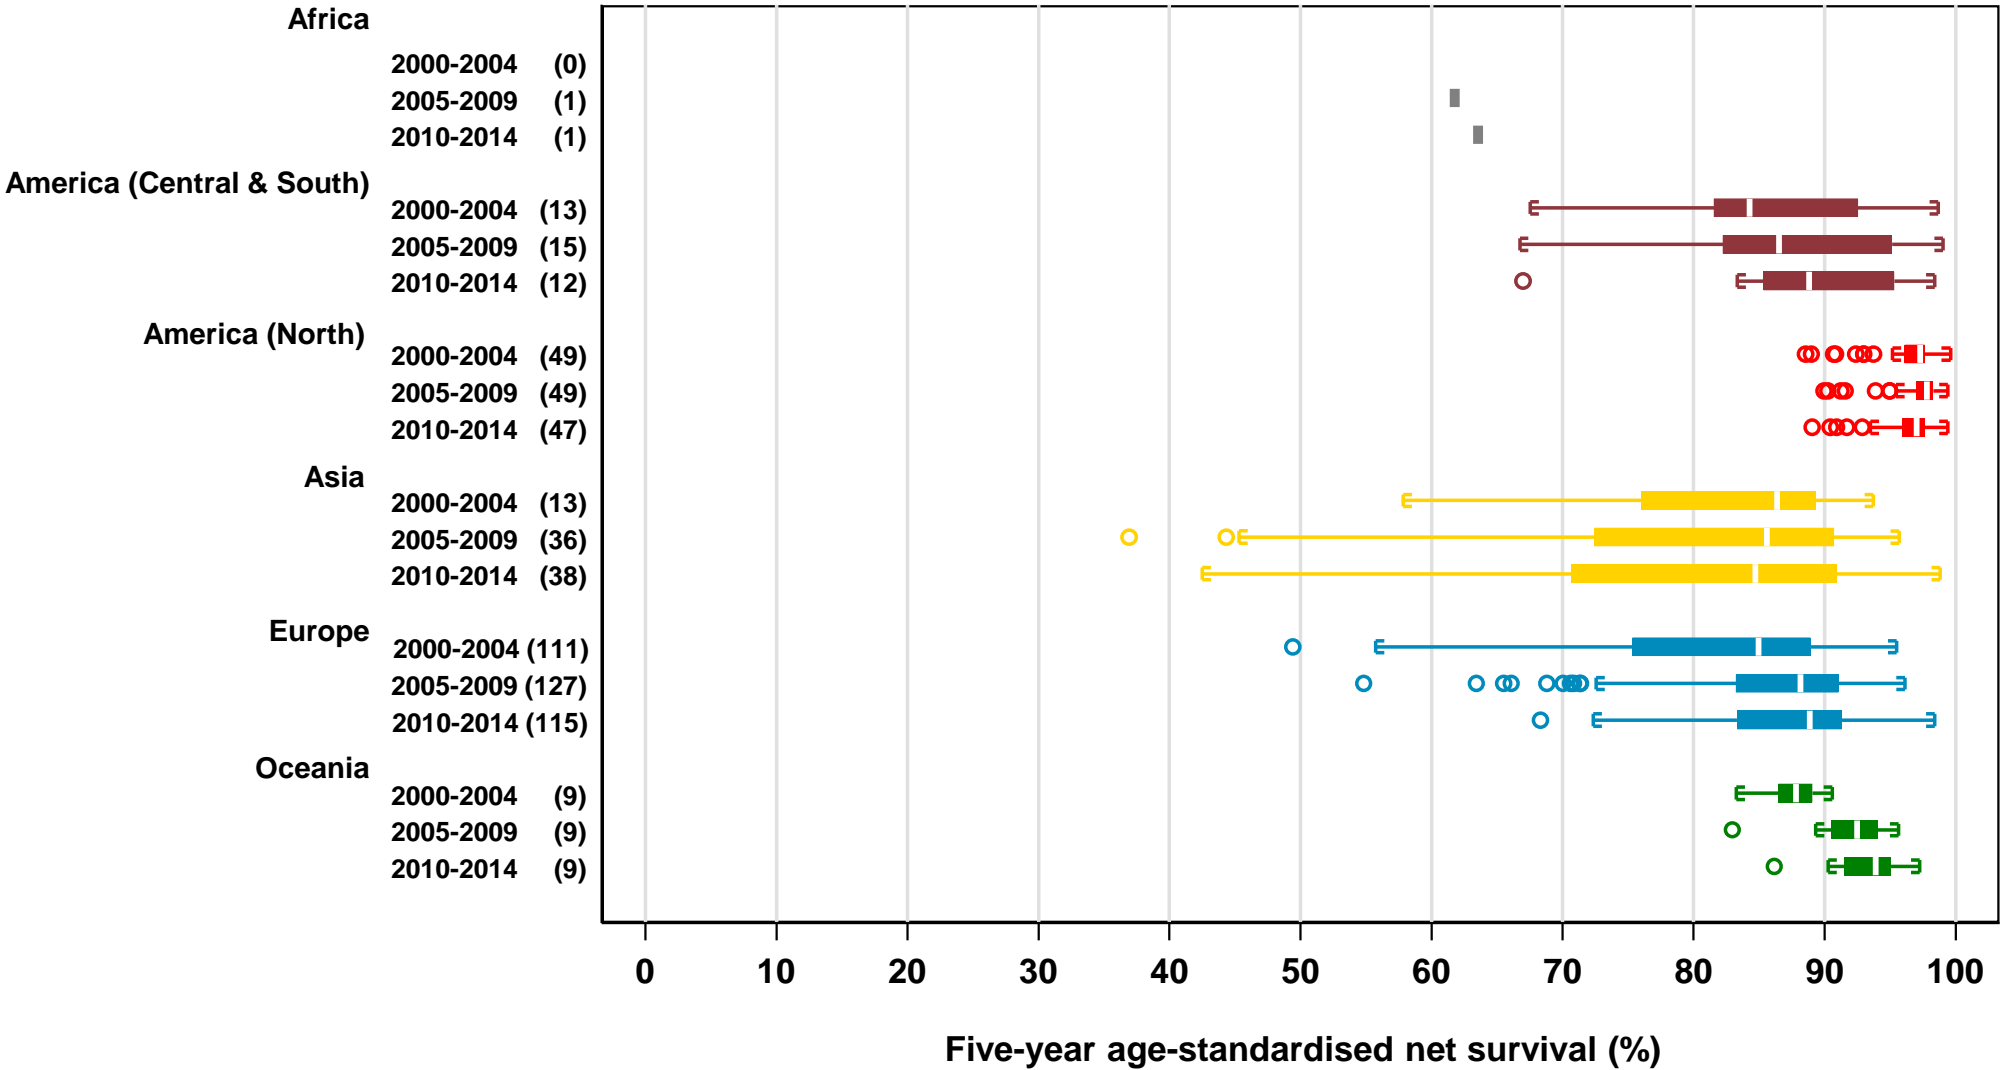

**Web-figure 4.13: Brain (adults)** – Global range of age-standardised five-year net survival (%) estimates among 257 cancer registry populations in 52 countries, by continent and calendar period of diagnosis (2000-2004, 2005-2009, 2010-2014): adults (15-99 years)

[Back](#)

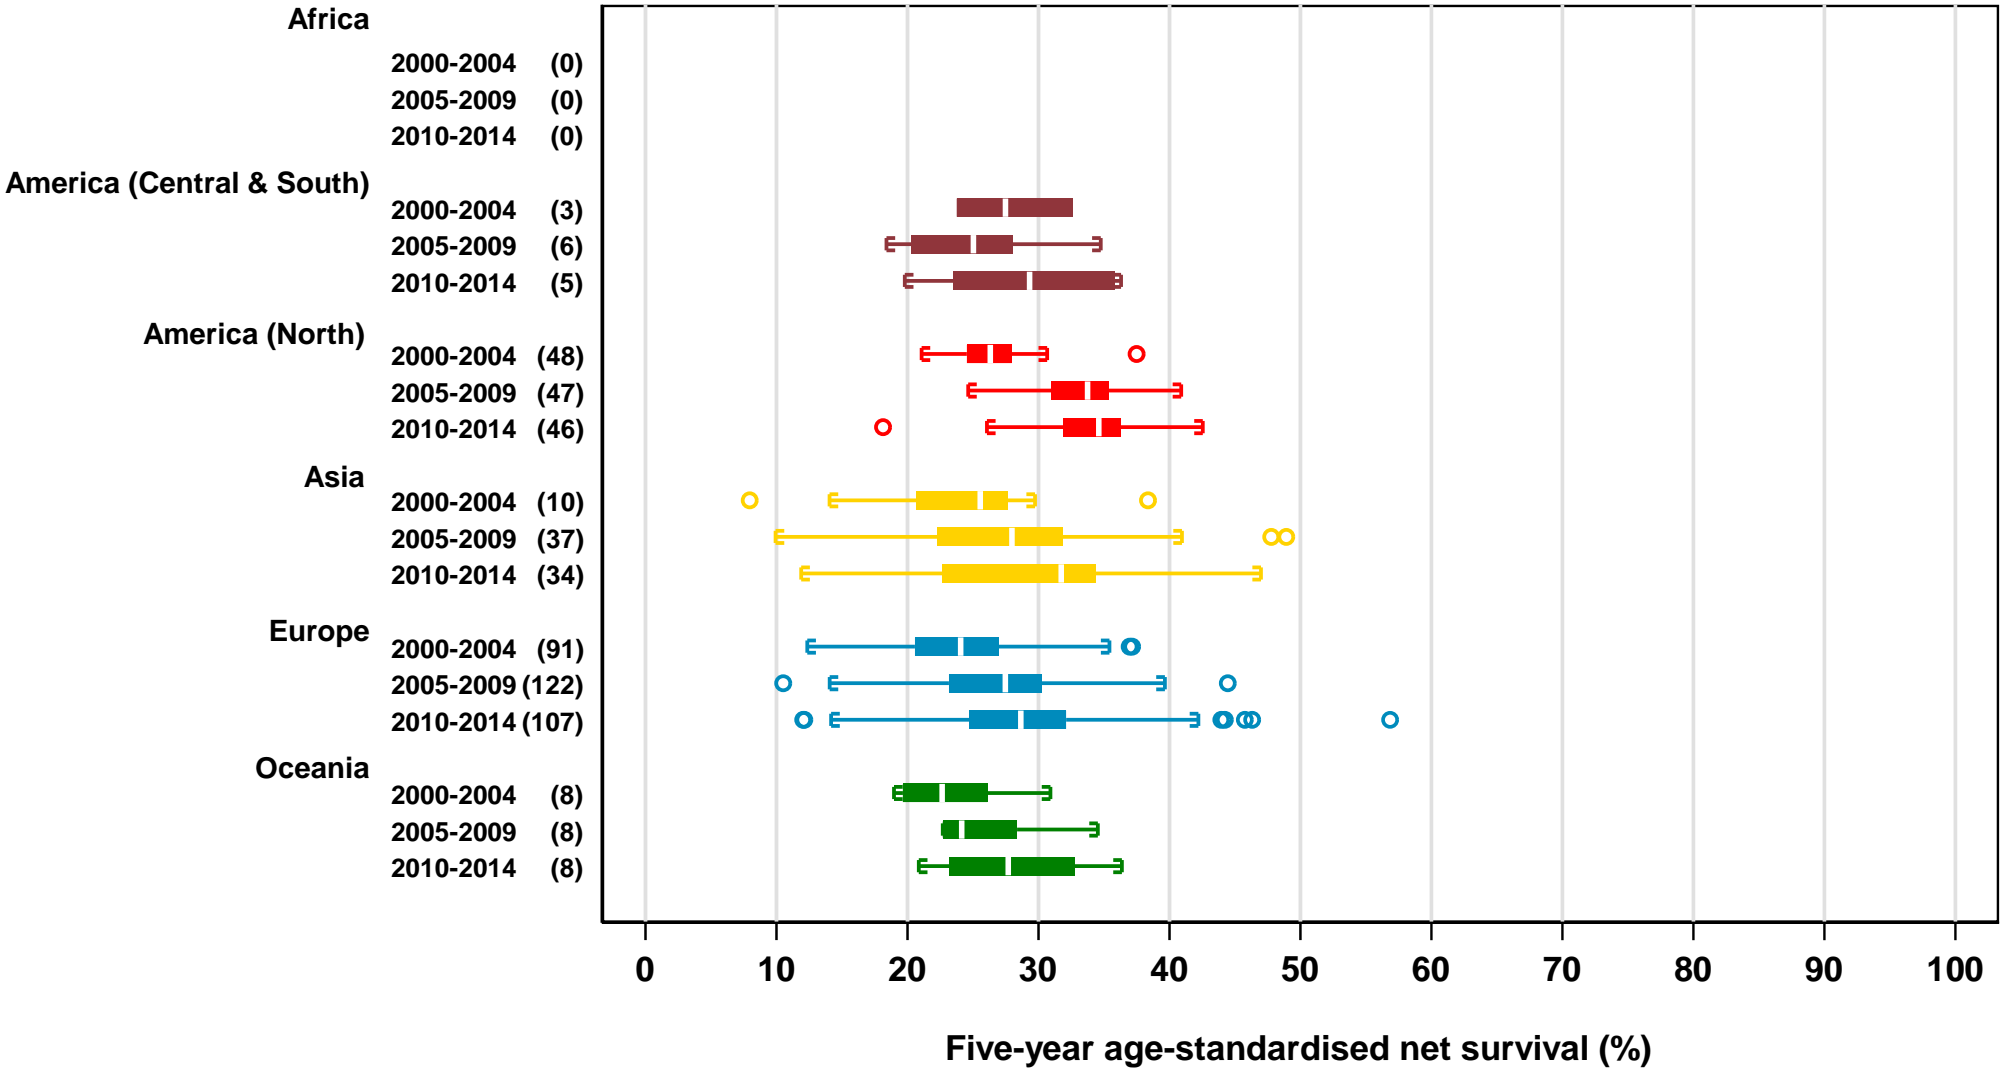

**Web-figure 4.14: Myeloid malignancies (adults)** – Global range of age-standardised five-year net survival (%) estimates among 267 cancer registry populations in 56 countries, by continent and calendar period of diagnosis (2000-2004, 2005-2009, 2010-2014): adults (15-99 years)

[Back](#)

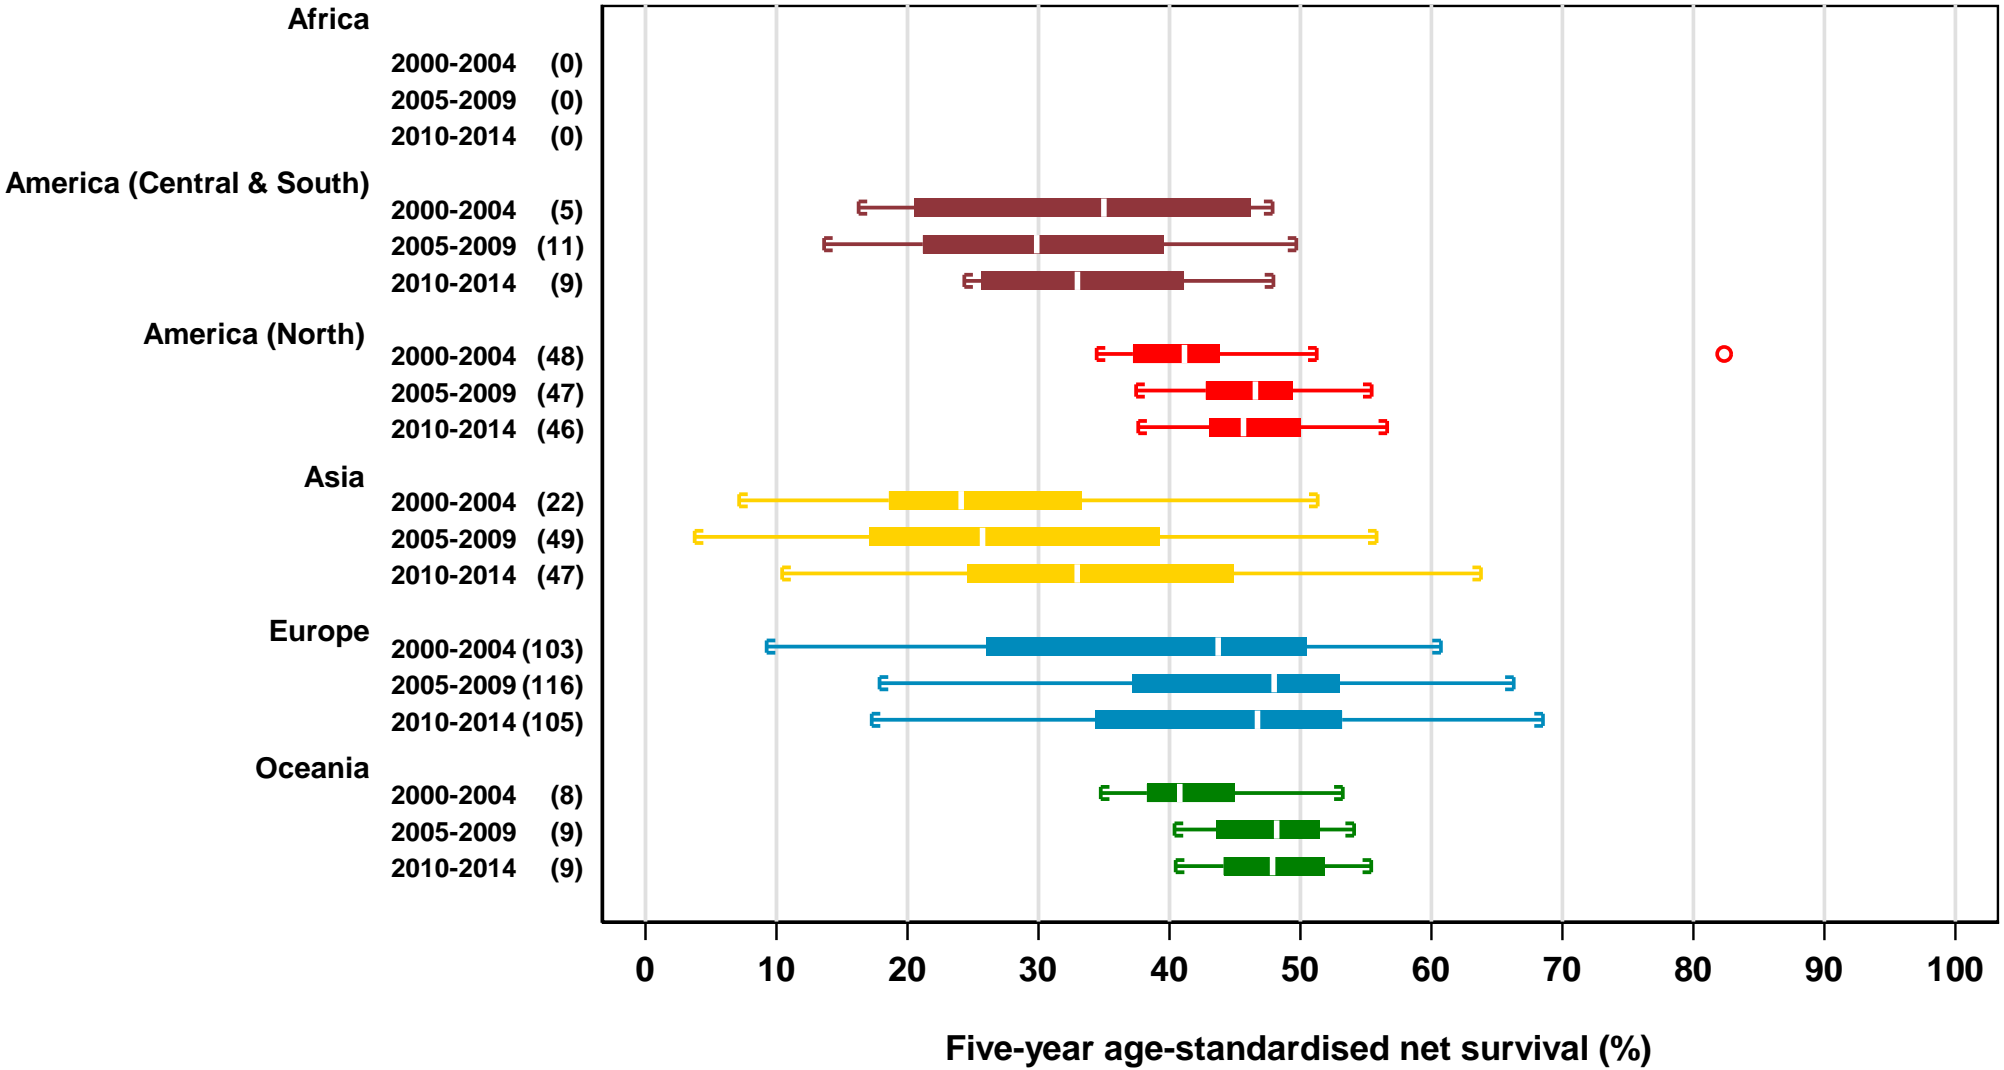

**Web-figure 4.15: Lymphoid malignancies (adults)** – Global range of age-standardised five-year net survival (%) estimates among 277 cancer registry populations in 60 countries, by continent and calendar period of diagnosis (2000-2004, 2005-2009, 2010-2014): adults (15-99 years)

[Back](#)

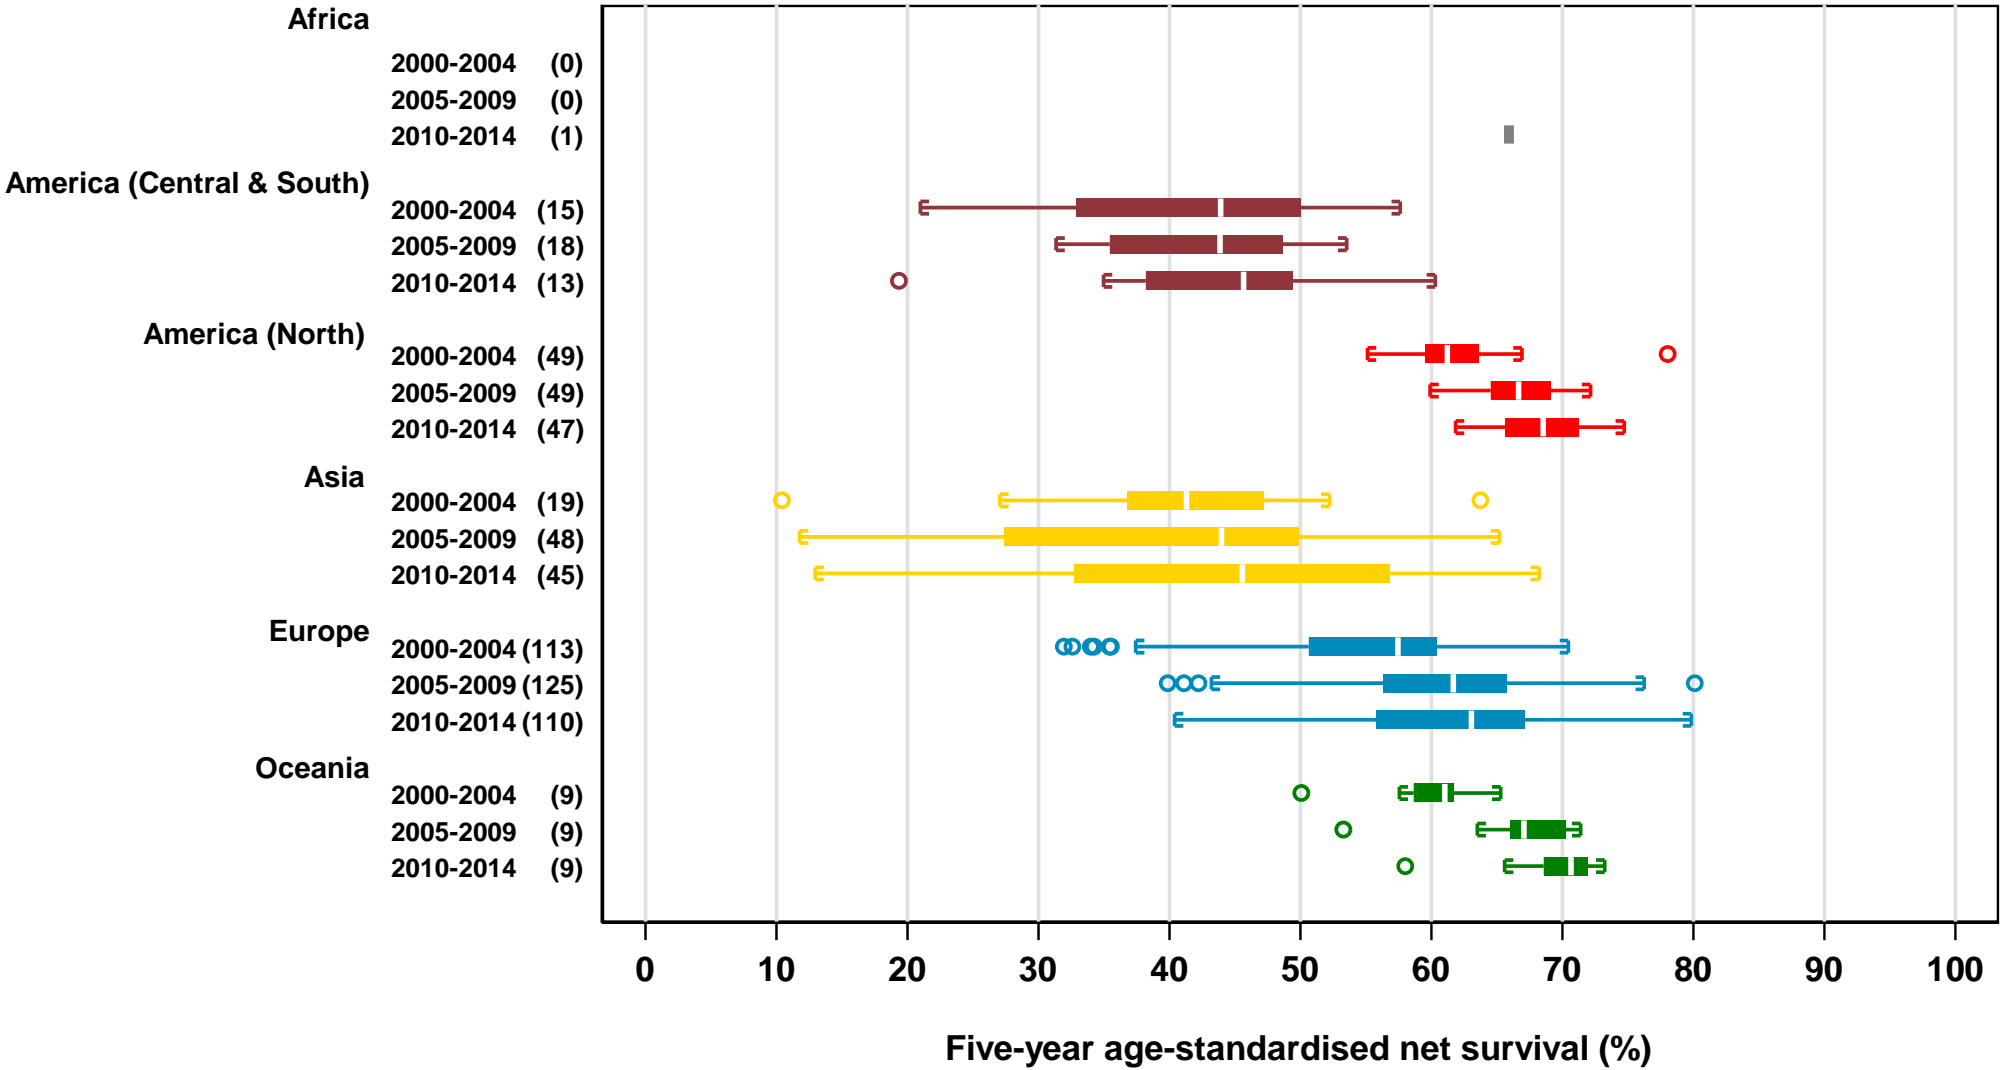

**Web-figure 4.16: Brain (children)** – Global range of age-standardised five-year net survival (%) estimates among 155 cancer registry populations in 46 countries, by continent and calendar period of diagnosis (2000-2004, 2005-2009, 2010-2014): children (0-14 years)

[Back](#)

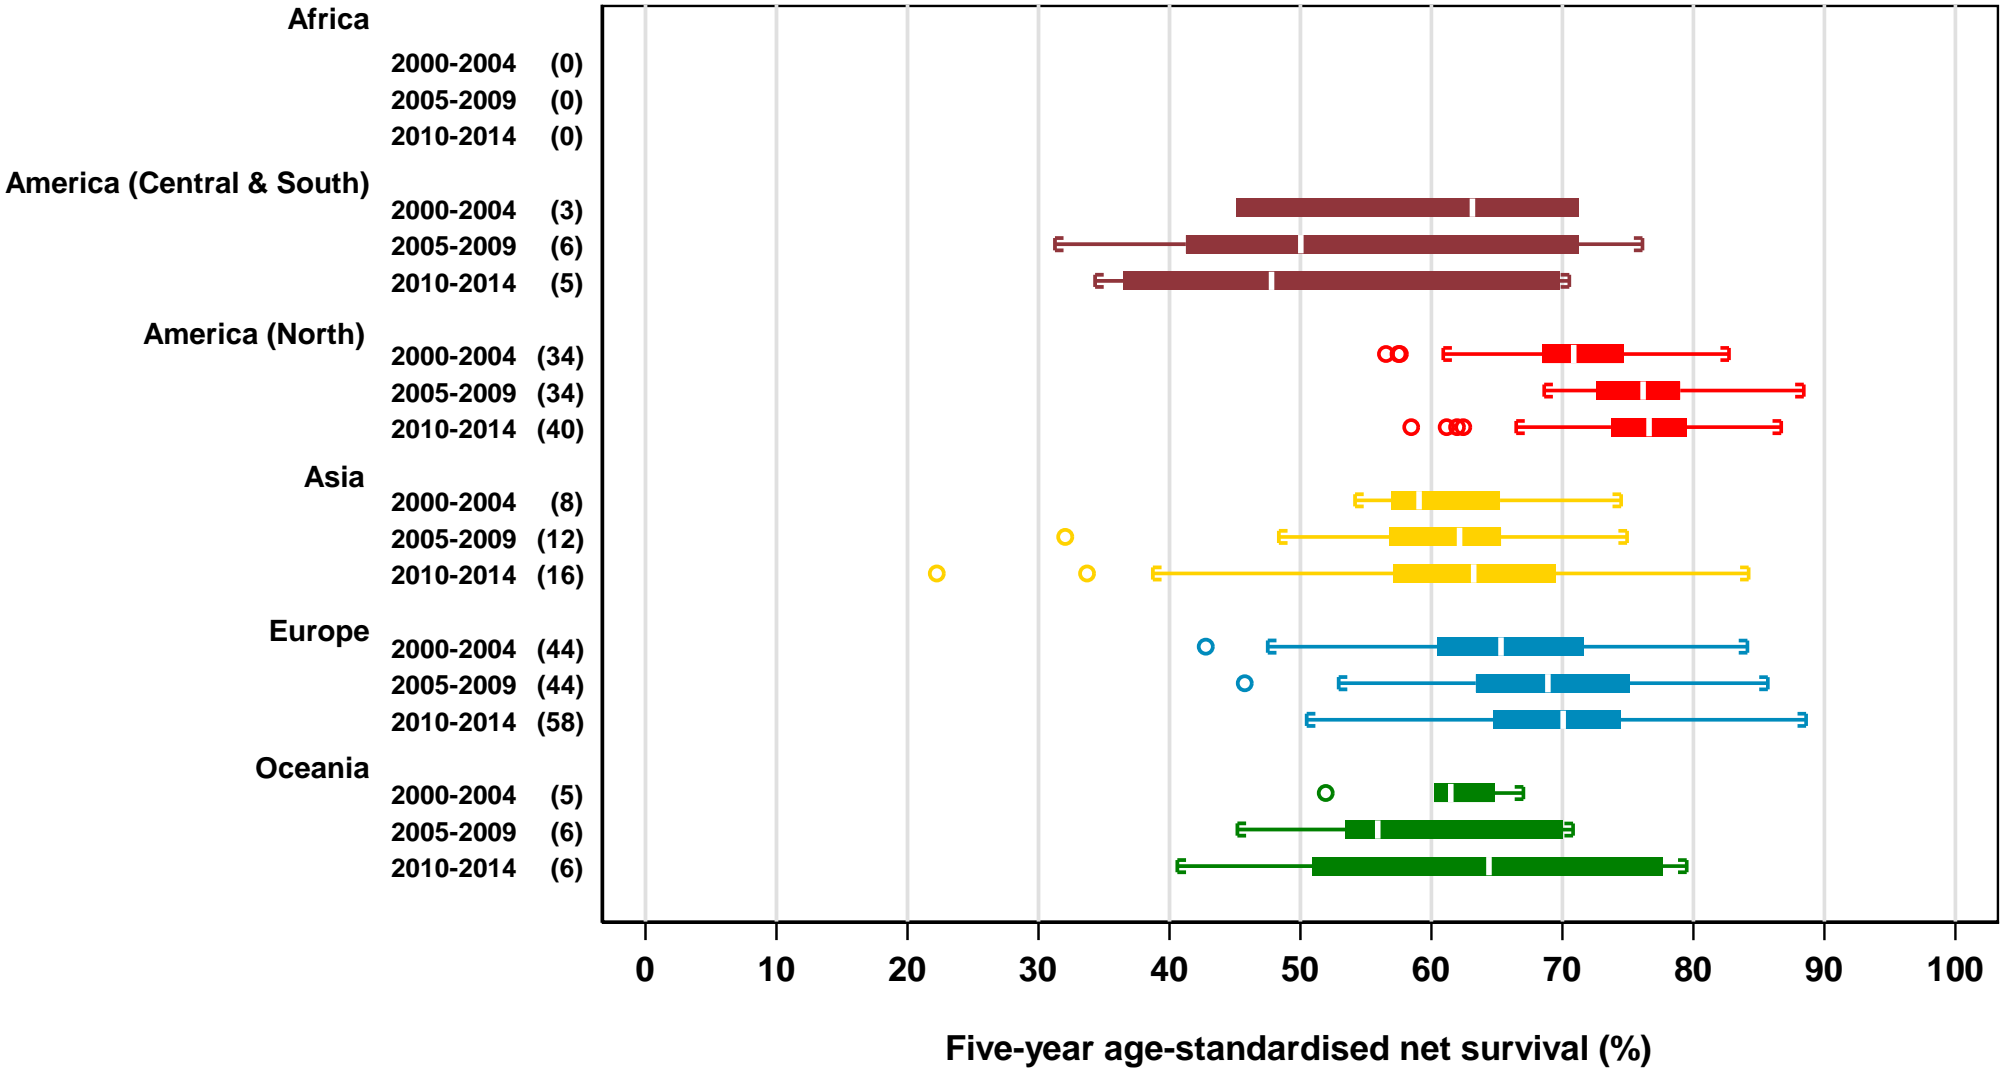

**Web-figure 4.17: Acute lymphoblastic leukaemia (children)** – Global range of age-standardised five-year net survival (%) estimates among 167 cancer registry populations in 52 countries, by continent and calendar period of diagnosis (2000-2004, 2005-2009, 2010-2014): children (0-14 years)

[Back](#)

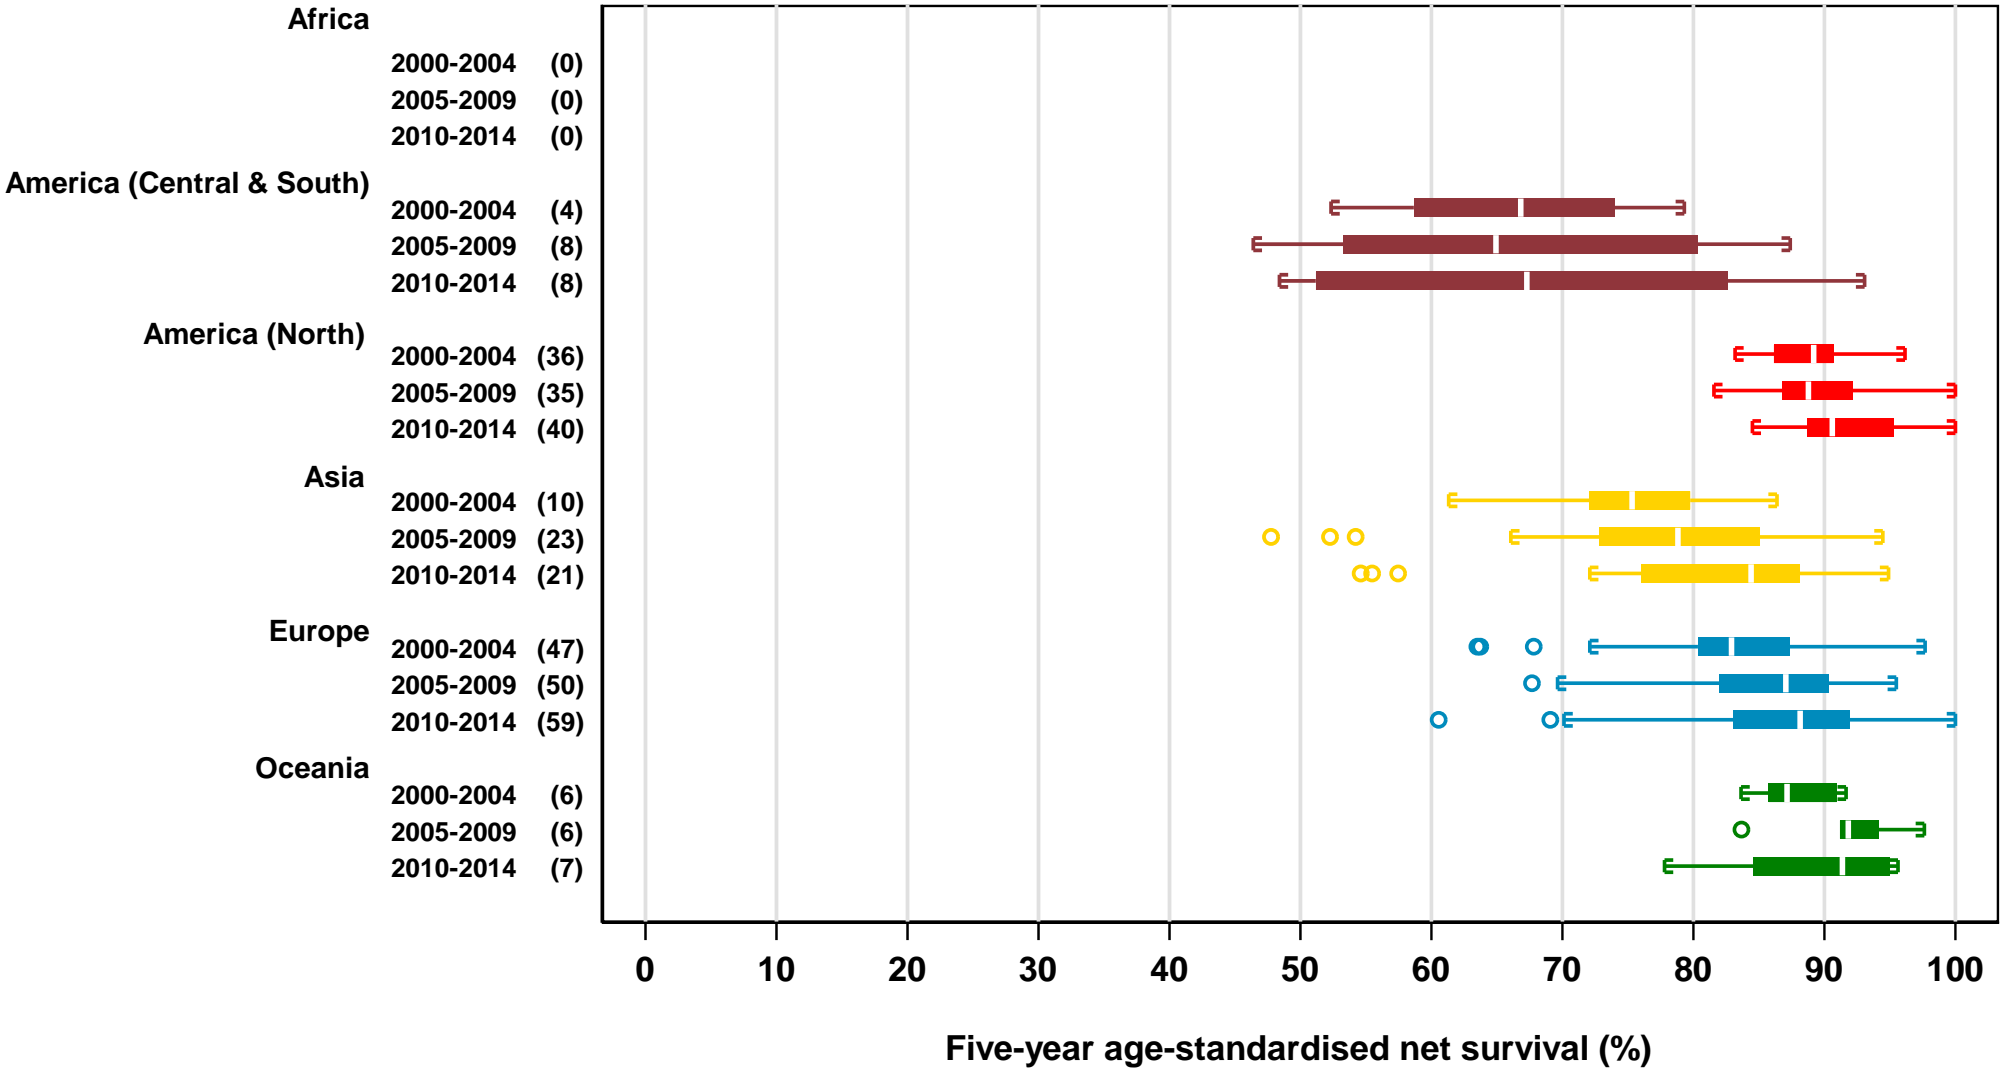

**Web-figure 4.18: Lymphomas (children)** – Global range of age-standardised five-year net survival (%) estimates among 139 cancer registry populations in 52 countries, by continent and calendar period of diagnosis (2000-2004, 2005-2009, 2010-2014): children (0-14 years)

[Back](#)

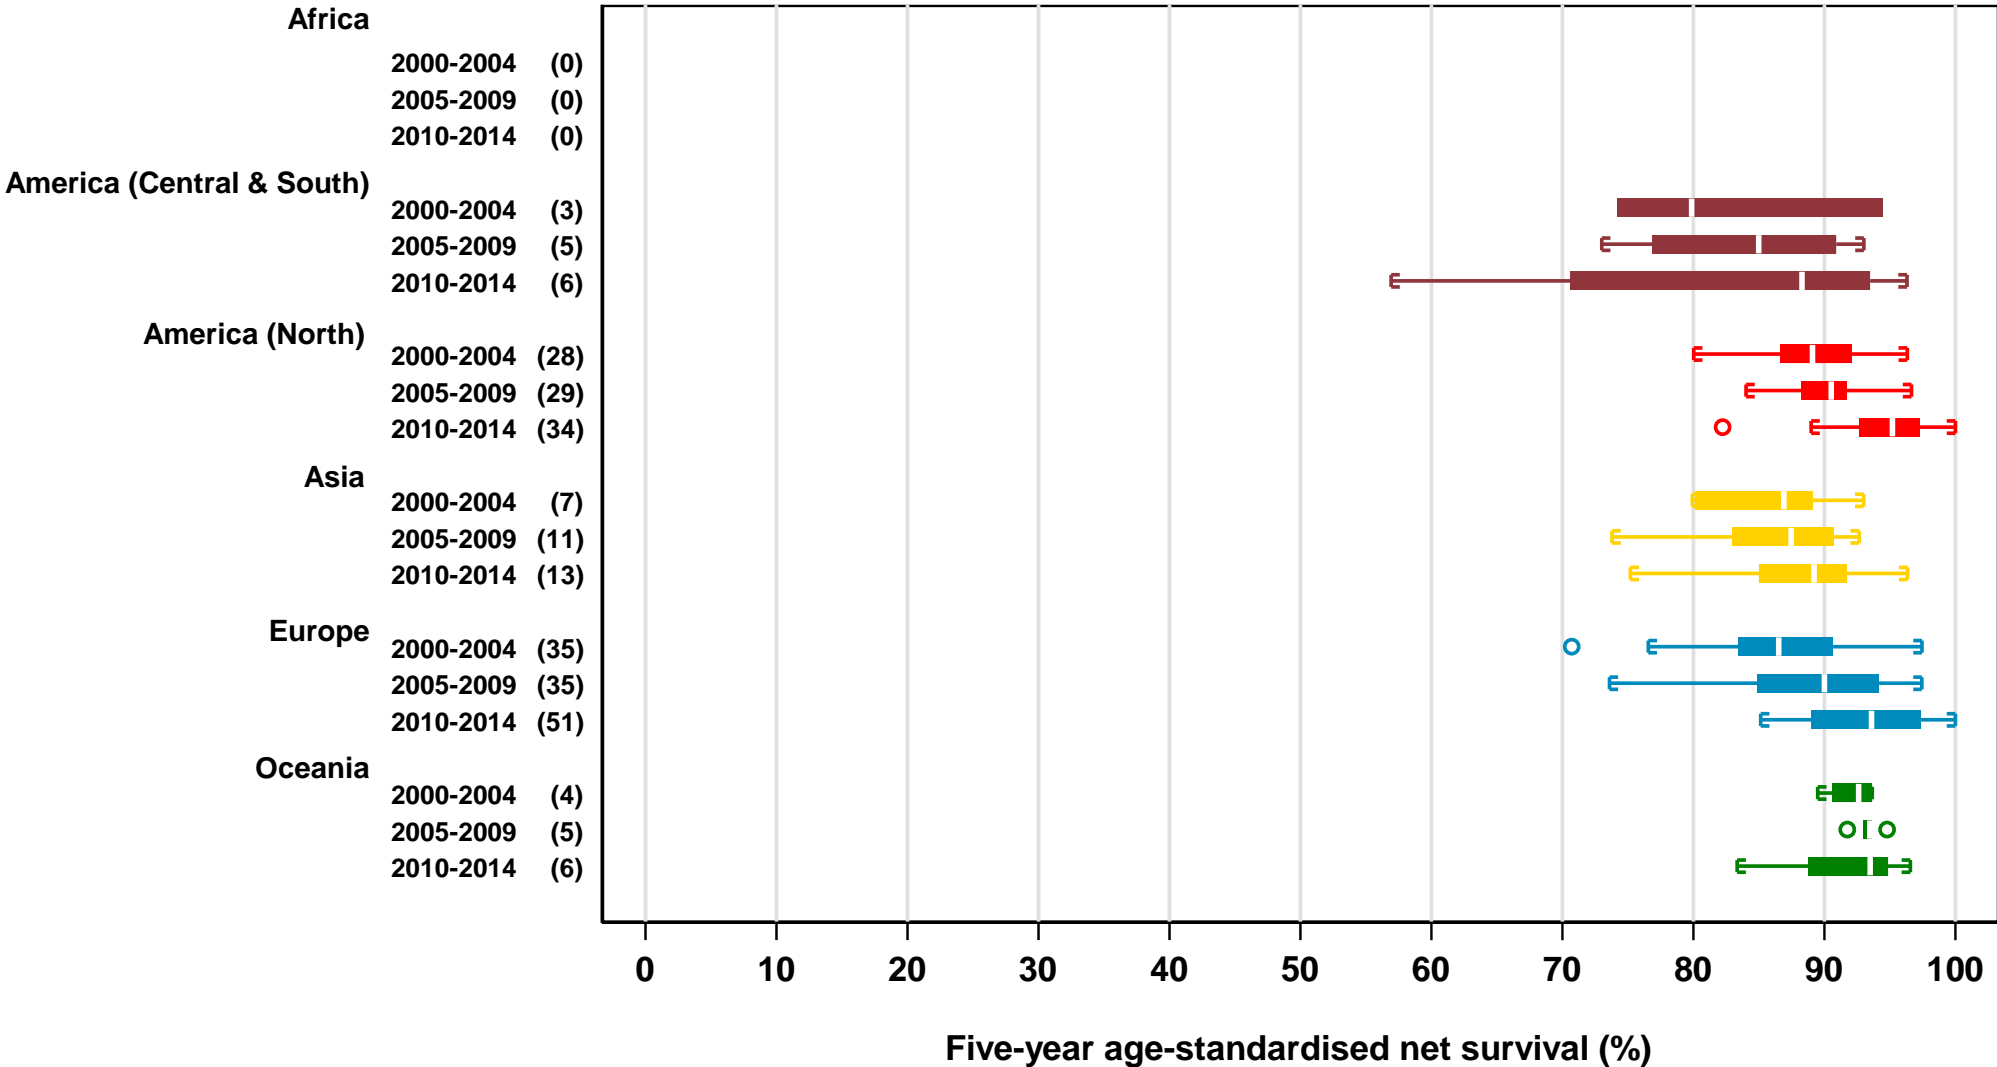

## Web-annex 1 Structure of survival analyses, patients diagnosed 2000-2014

|                            |      | Calendar year of follow-up                                                                                      |      |      |      |      |      |      |      |      |      |                 |      |      |      |      |      |
|----------------------------|------|-----------------------------------------------------------------------------------------------------------------|------|------|------|------|------|------|------|------|------|-----------------|------|------|------|------|------|
|                            |      | Calendar years within which conditional probabilities are used to estimate cumulative survival up to five years |      |      |      |      |      |      |      |      |      |                 |      |      |      |      |      |
|                            |      | 2000                                                                                                            | 2001 | 2002 | 2003 | 2004 | 2005 | 2006 | 2007 | 2008 | 2009 | 2010            | 2011 | 2012 | 2013 | 2014 |      |
| Calendar year of diagnosis | 2000 | 0                                                                                                               | 1    | 2    | 3    | 4    | 5    | 6    | 7    | 8    | 9    | 10              | 11   | 12   | 13   | 14   | 2000 |
|                            | 2001 |                                                                                                                 | 0    | 1    | 2    | 3    | 4    | 5    | 6    | 7    | 8    | 9               | 10   | 11   | 12   | 13   | 2001 |
|                            | 2002 |                                                                                                                 |      | 0    | 1    | 2    | 3    | 4    | 5    | 6    | 7    | 8               | 9    | 10   | 11   | 12   | 2002 |
|                            | 2003 | Cohort analysis                                                                                                 |      |      | 0    | 1    | 2    | 3    | 4    | 5    | 6    | 7               | 8    | 9    | 10   | 11   | 2003 |
|                            | 2004 |                                                                                                                 |      |      | 0    | 1    | 2    | 3    | 4    | 5    | 6    | 7               | 8    | 9    | 10   |      | 2004 |
|                            | 2005 |                                                                                                                 |      |      |      | 0    | 1    | 2    | 3    | 4    | 5    | 6               | 7    | 8    | 9    |      | 2005 |
|                            | 2006 |                                                                                                                 |      |      |      |      | 0    | 1    | 2    | 3    | 4    | 5               | 6    | 7    | 8    |      | 2006 |
|                            | 2007 |                                                                                                                 |      |      |      |      |      | 0    | 1    | 2    | 3    | 4               | 5    | 6    | 7    |      | 2007 |
|                            | 2008 |                                                                                                                 |      |      |      |      |      |      | 0    | 1    | 2    | 3               | 4    | 5    | 6    |      | 2008 |
|                            | 2009 |                                                                                                                 |      |      |      |      |      |      |      | 0    | 1    | 2               | 3    | 4    | 5    |      | 2009 |
| Calendar year of diagnosis | 2010 |                                                                                                                 |      |      |      |      |      |      |      |      | 0    | 1               | 2    | 3    | 4    |      | 2010 |
|                            | 2011 |                                                                                                                 |      |      |      |      |      |      |      |      |      | 0               | 1    | 2    | 3    |      | 2011 |
|                            | 2012 |                                                                                                                 |      |      |      |      |      |      |      |      |      |                 | 0    | 1    | 2    |      | 2012 |
|                            | 2013 |                                                                                                                 |      |      |      |      |      |      |      |      |      |                 |      | 0    | 1    |      | 2013 |
|                            | 2014 |                                                                                                                 |      |      |      |      |      |      |      |      |      |                 |      |      | 0    |      | 2014 |
|                            |      |                                                                                                                 |      |      |      |      |      |      |      |      |      | Period analysis |      |      |      |      |      |

Patients diagnosed between 2000 and 2014 may be followed up in successive years until the end of 2014 (or later). The numbers in the cells indicate the **minimum number of complete years of follow-up** available for patients who were diagnosed in a given year (rows) and who survived to the end of a later year (columns).

Three calendar periods of diagnosis are defined. Patients diagnosed during 2000-2004 and 2005-2009 all have a potential follow-up of at least 5 years by the end of 2014. Their survival can be estimated in classical **cohort** fashion (solid outlines): conditional probabilities of survival are multiplied within successive intervals (along the row) to obtain a cumulative probability of survival up to five years. For patients who were diagnosed or followed up during 2010-2014, a **period** estimate of survival is obtained by multiplying the conditional probabilities of survival up to five years within each calendar year (column) (shaded area; see text).

## Web-annex 2: CONCORD-3 life table report

**Method:** Single-year-of-age life tables for Finland for the years 2000 and 2014 were constructed from the numbers of deaths and population counts by single year of age, sex and calendar year, using Poisson regression and flexible functions. Life tables for intervening years were constructed by linear interpolation. (Rachet B, Maringe C, Woods LM, Ellis L, Spika D, Allemani C. Multivariable flexible modelling for estimating complete, smoothed life tables for sub-national populations. *BMC Public Health* 2015; **15**: 1240).

**Source:** Statistics Finland

**Registry population (2014):** 5,479,660

## Year 2000

Table 1: Summary statistics

| Sex    | Life expectancy at birth (years) | Probability (%) of dying between exact ages |             |             |
|--------|----------------------------------|---------------------------------------------|-------------|-------------|
|        |                                  | 15-60 years                                 | 60-85 years | 85-99 years |
| Male   | 74.3                             | 14.1                                        | 71.1        | 99.0        |
| Female | 81.2                             | 6.0                                         | 50.1        | 98.3        |

Figure 1: Observed and fitted mortality rates (mx; logarithmic scale) by age and sex

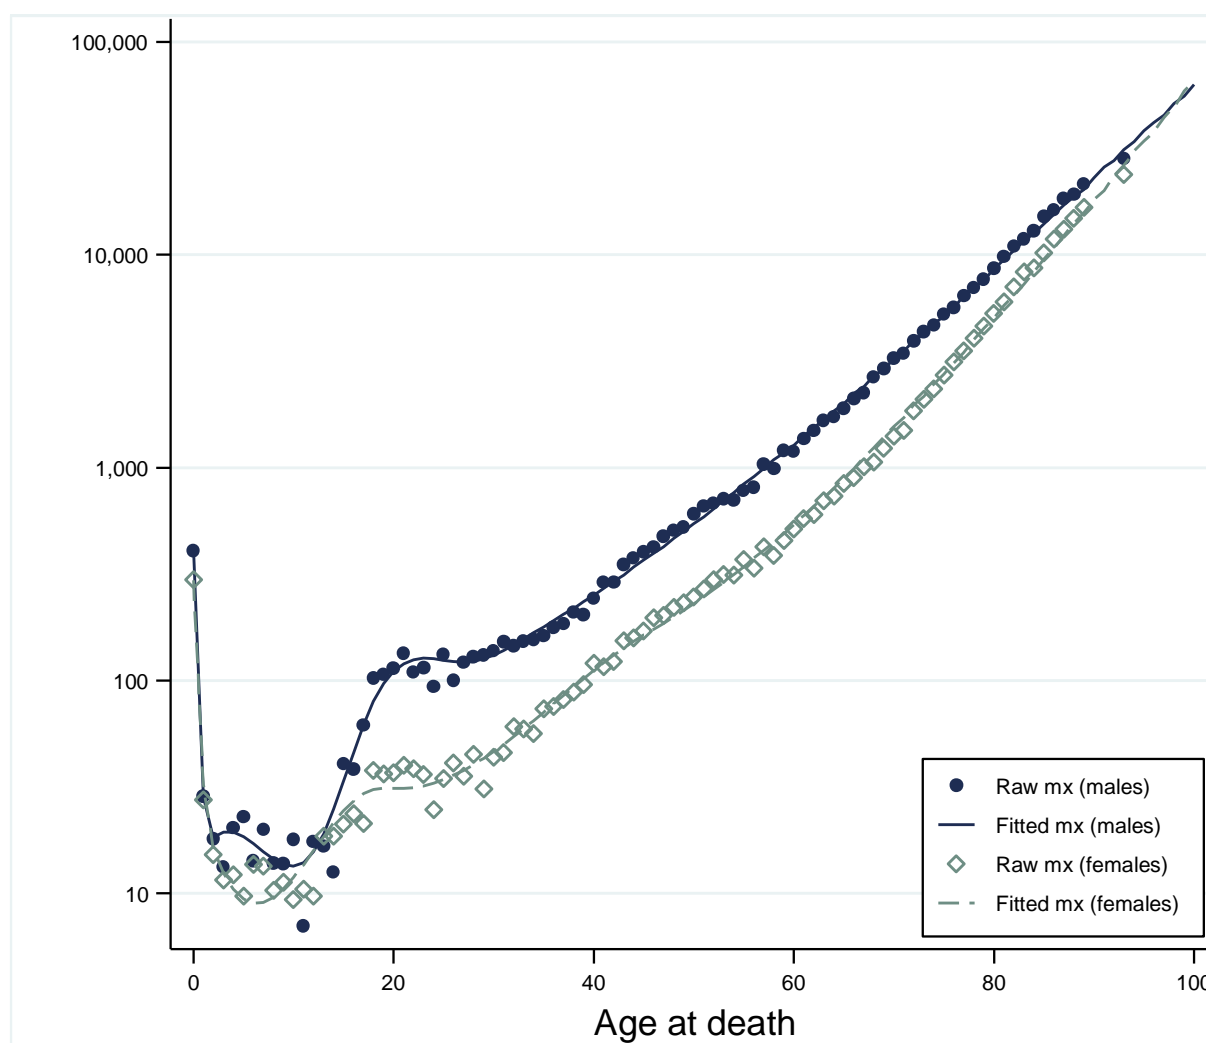

**Figure 2: Observed and fitted mortality rates (mx; arithmetic scale) by broad age band and sex**

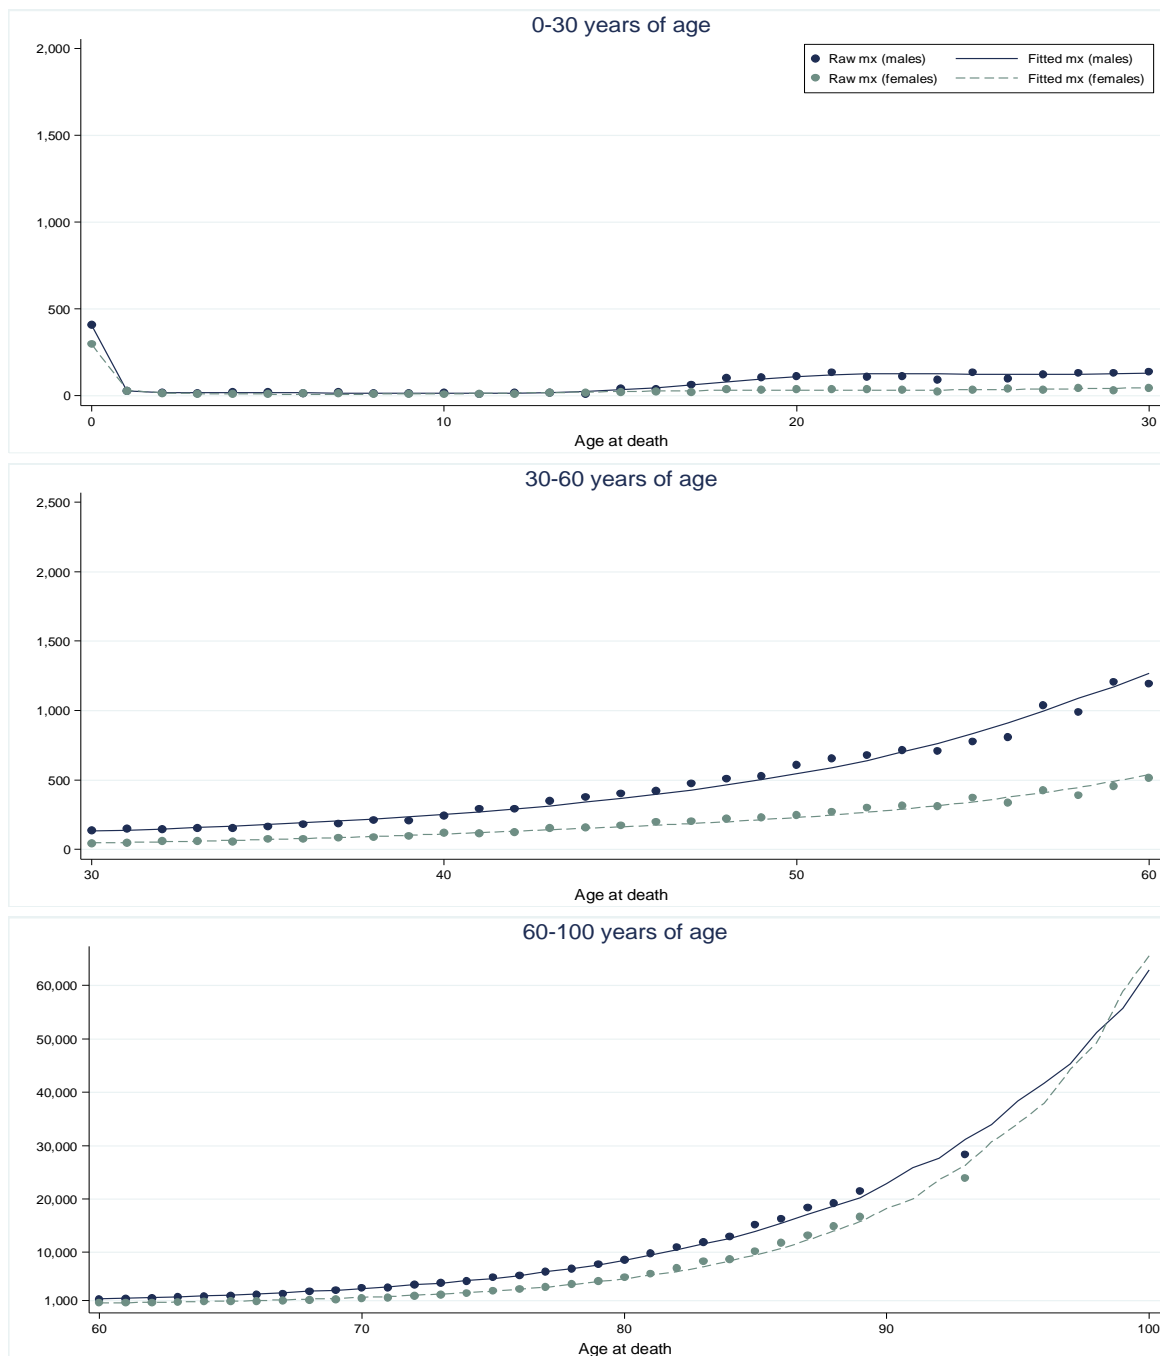

**Figure 3: Fitted versus observed mortality rates: residual deviance**

We plotted the deviance residuals of the model against age to assess goodness of fit. Deviance residuals are a measure of how closely the modelled values fit the observed data. They should be approximately normally distributed if the model fits the data well. The ideal range is between -2 and +2 (the red lines).

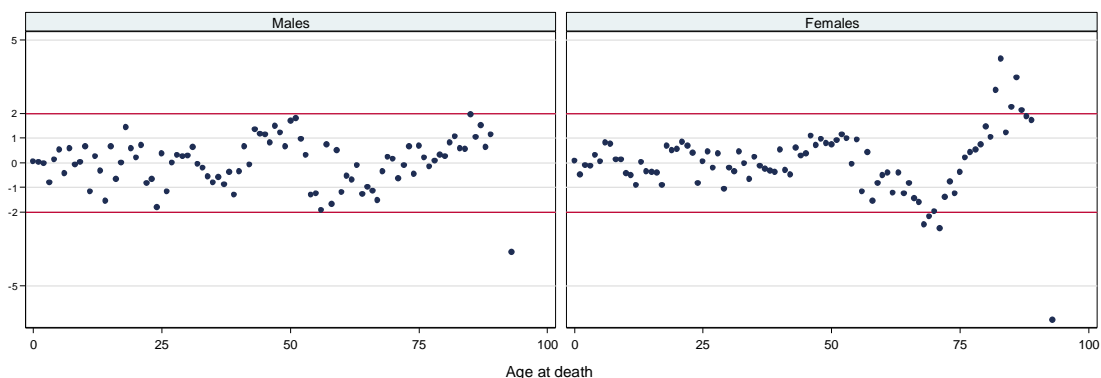

\*The lines at +2 and -2 show the ideal range for deviance residuals.

Table 1: Summary statistics

| Sex    | Life expectancy at birth (years) | Probability (%) of dying between exact ages |             |             |
|--------|----------------------------------|---------------------------------------------|-------------|-------------|
|        |                                  | 15-60 years                                 | 60-85 years | 85-99 years |
| Male   | 78.3                             | 9.8                                         | 58.9        | 97.2        |
| Female | 84.1                             | 4.4                                         | 40.2        | 94.3        |

Figure 1: Observed and fitted mortality rates (mx; logarithmic scale) by age and sex

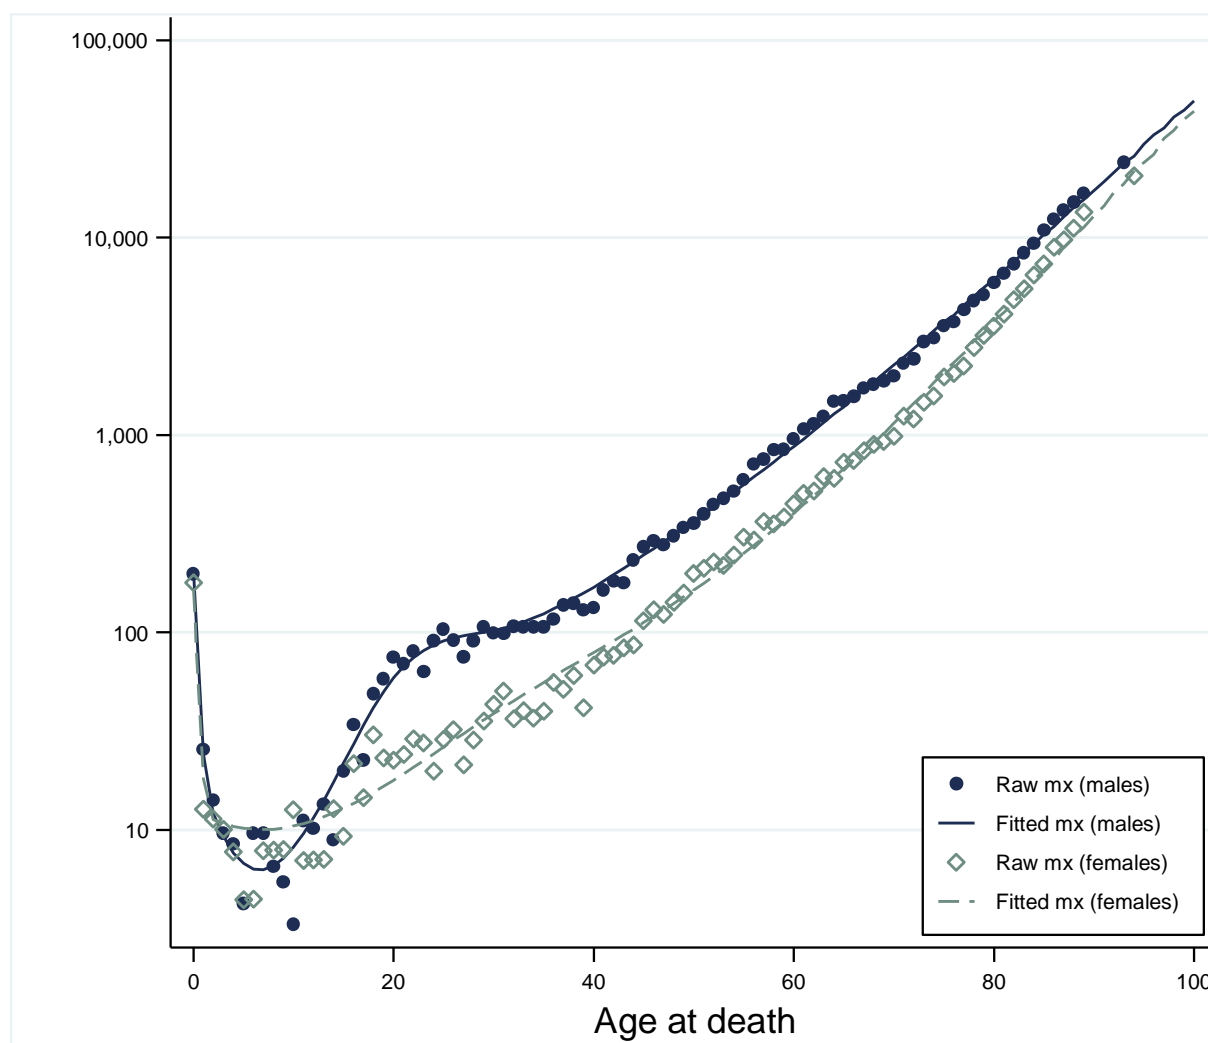

**Figure 2: Observed and fitted mortality rates (mx; arithmetic scale) by broad age band and sex**

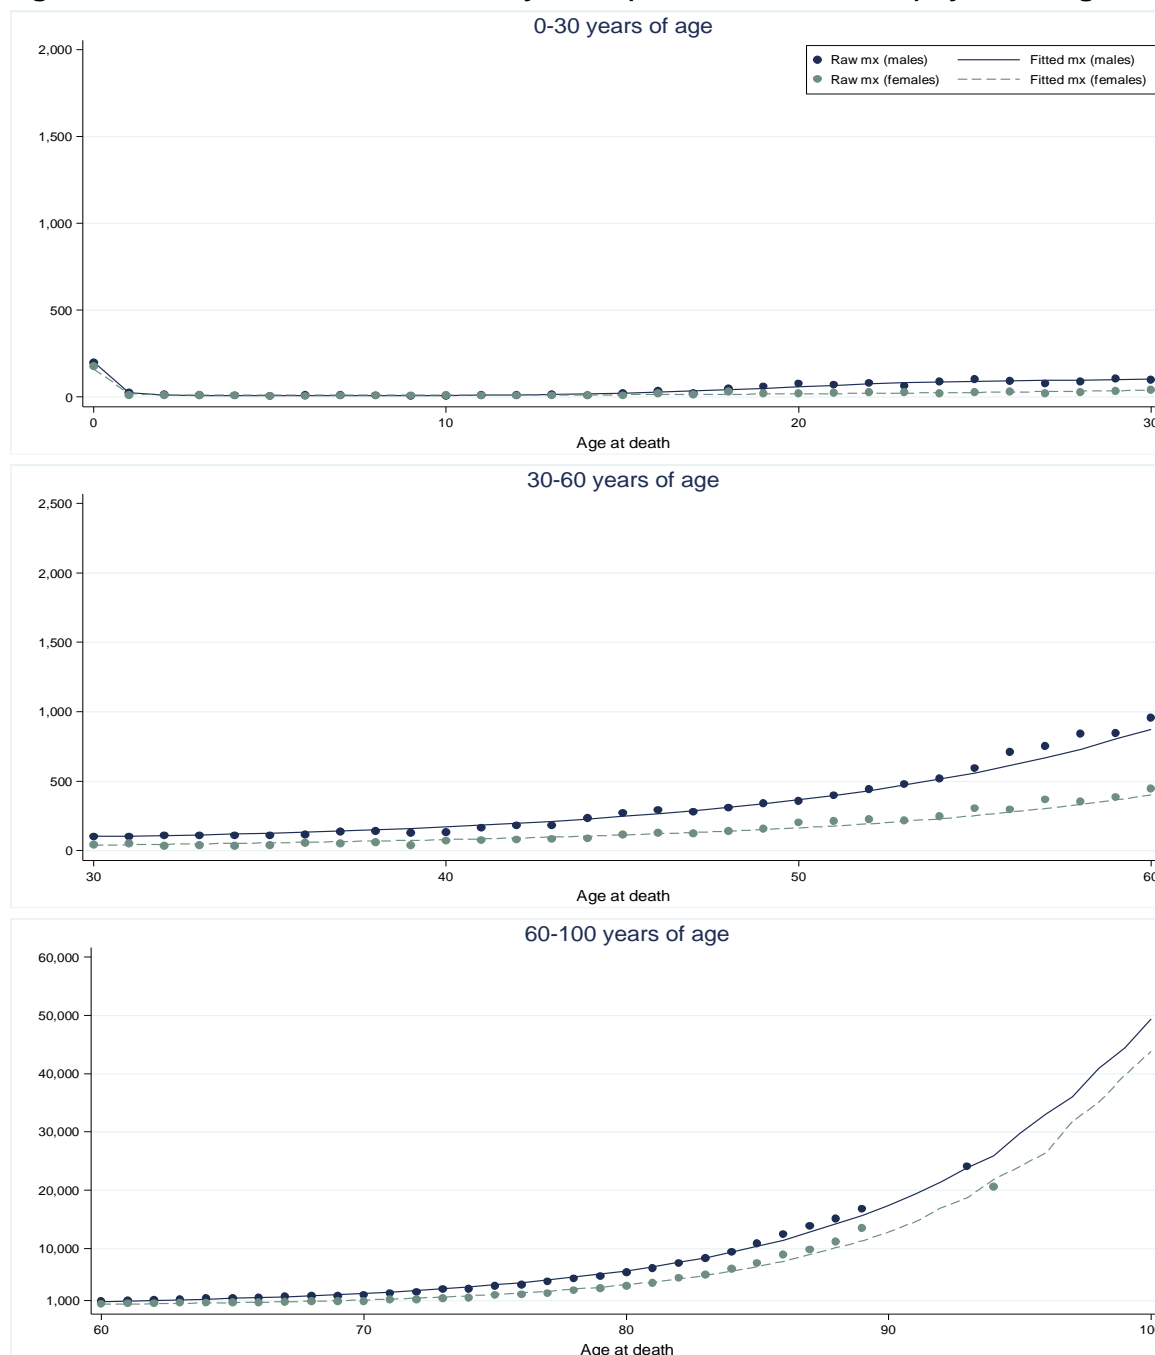

**Figure 3: Fitted versus observed mortality rates: residual deviance**

We plotted the deviance residuals of the model against age to assess goodness of fit. Deviance residuals are a measure of how closely the modelled values fit the observed data. They should be approximately normally distributed if the model fits the data well. The ideal range is between -2 and +2 (the red lines).

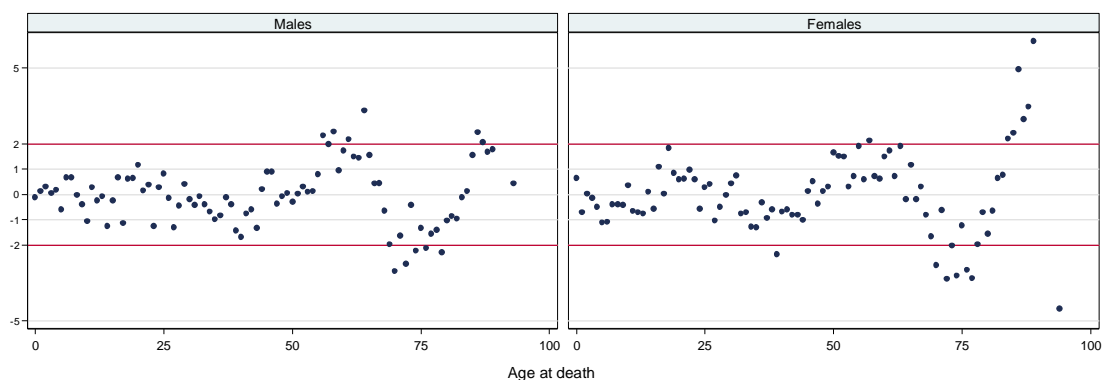

\*The lines at +2 and -2 show the ideal range for deviance residuals.
